# Supplementary material for: Making the Genome Huge: The Case of Triatoma delpontei, a Triatominae Species with More than 50% of Its Genome Full of Satellite DNA
Source: MDPI journal article supplement (doi:10.3390/genes14020371), 2023-01-31

**Figure S6.** RepeatProfiler results for the analyses of all satDNAs found in *T. delpontei* over three genomes: *T. delpontei*, Andean and non-Andean *T. infestans* lineages

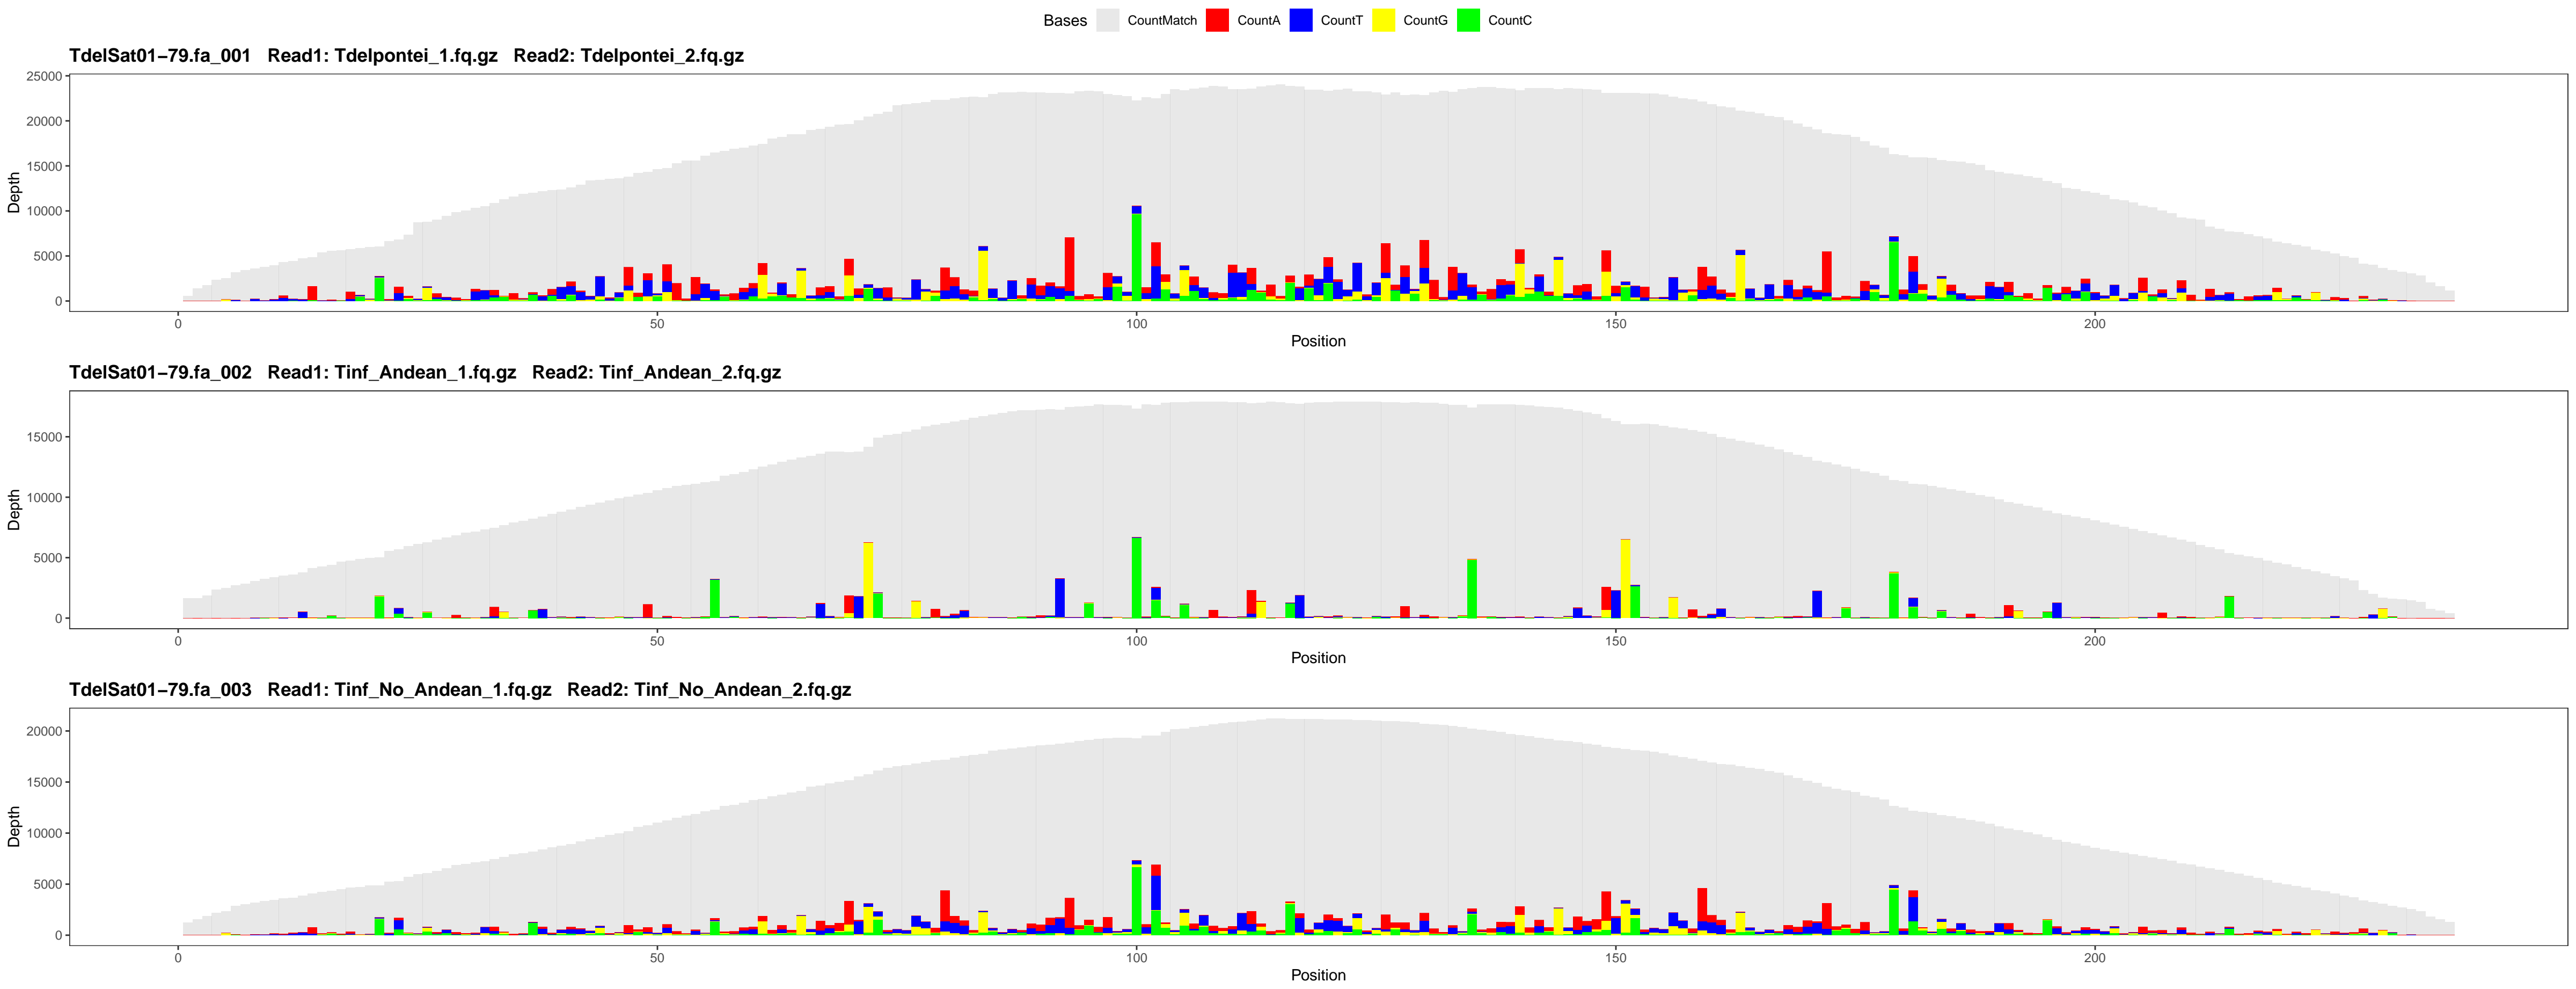

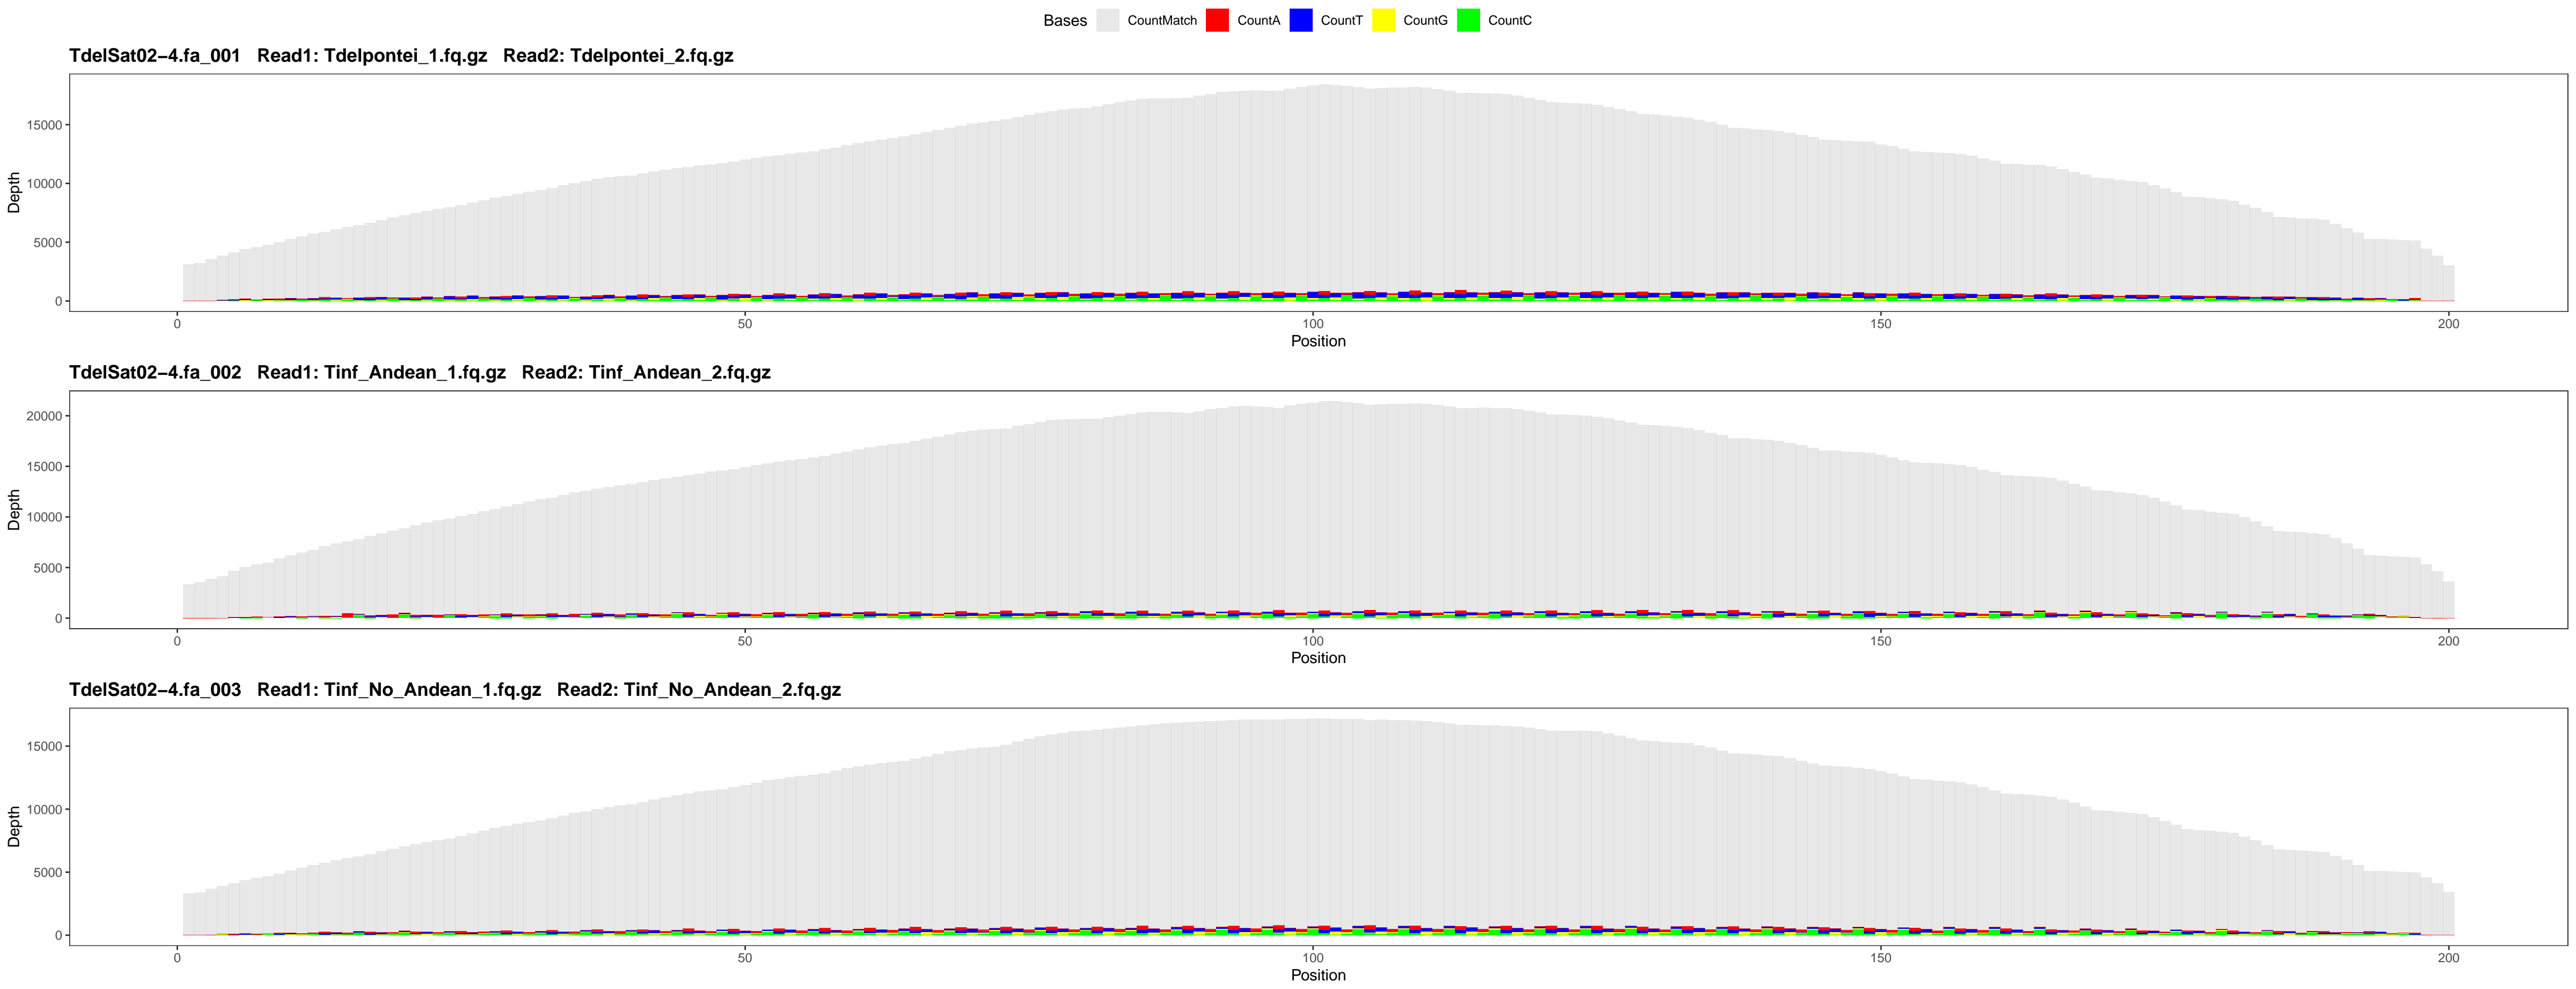

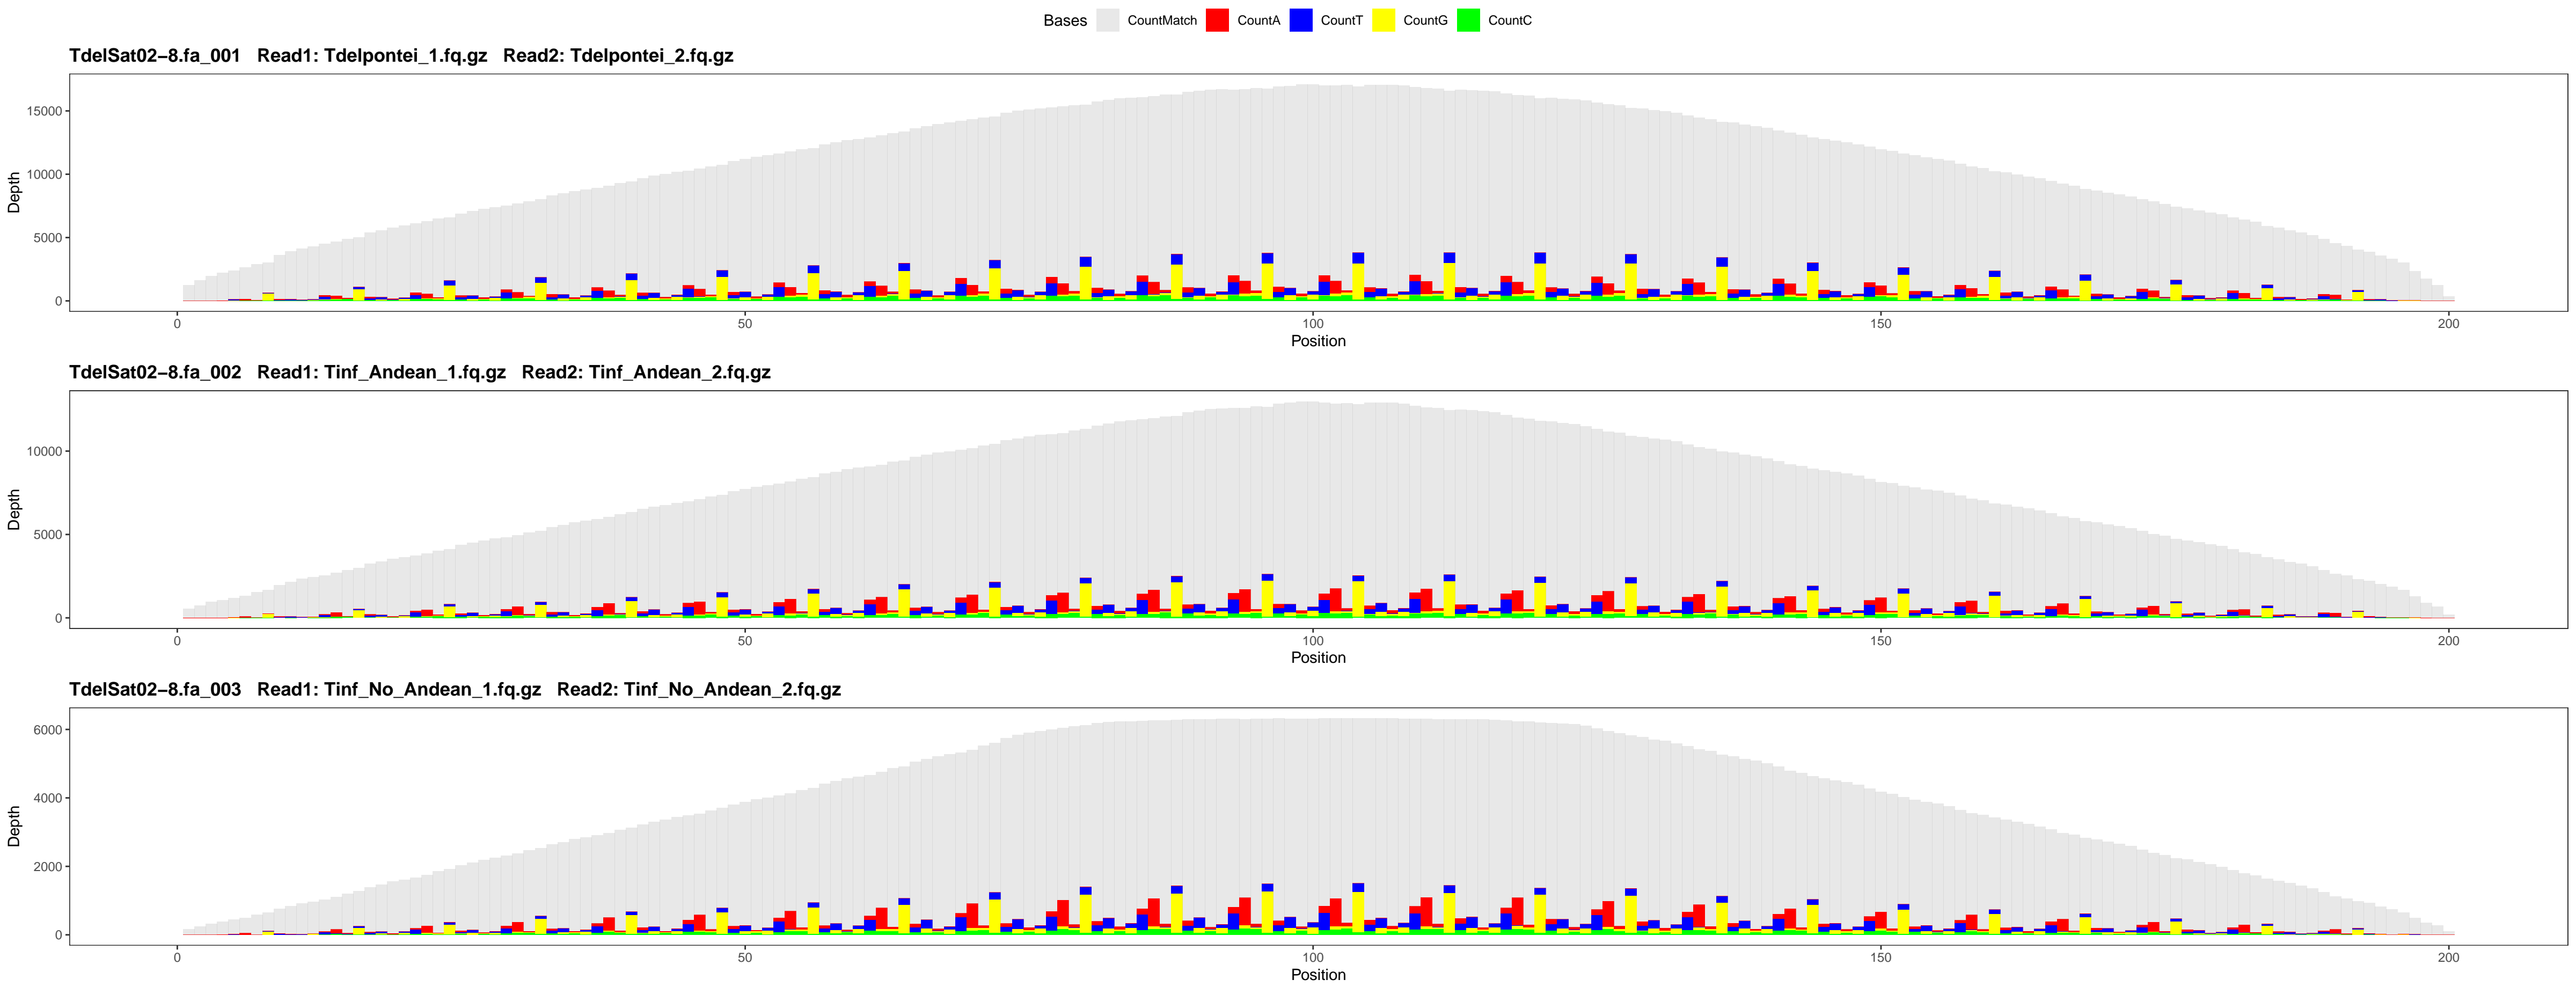

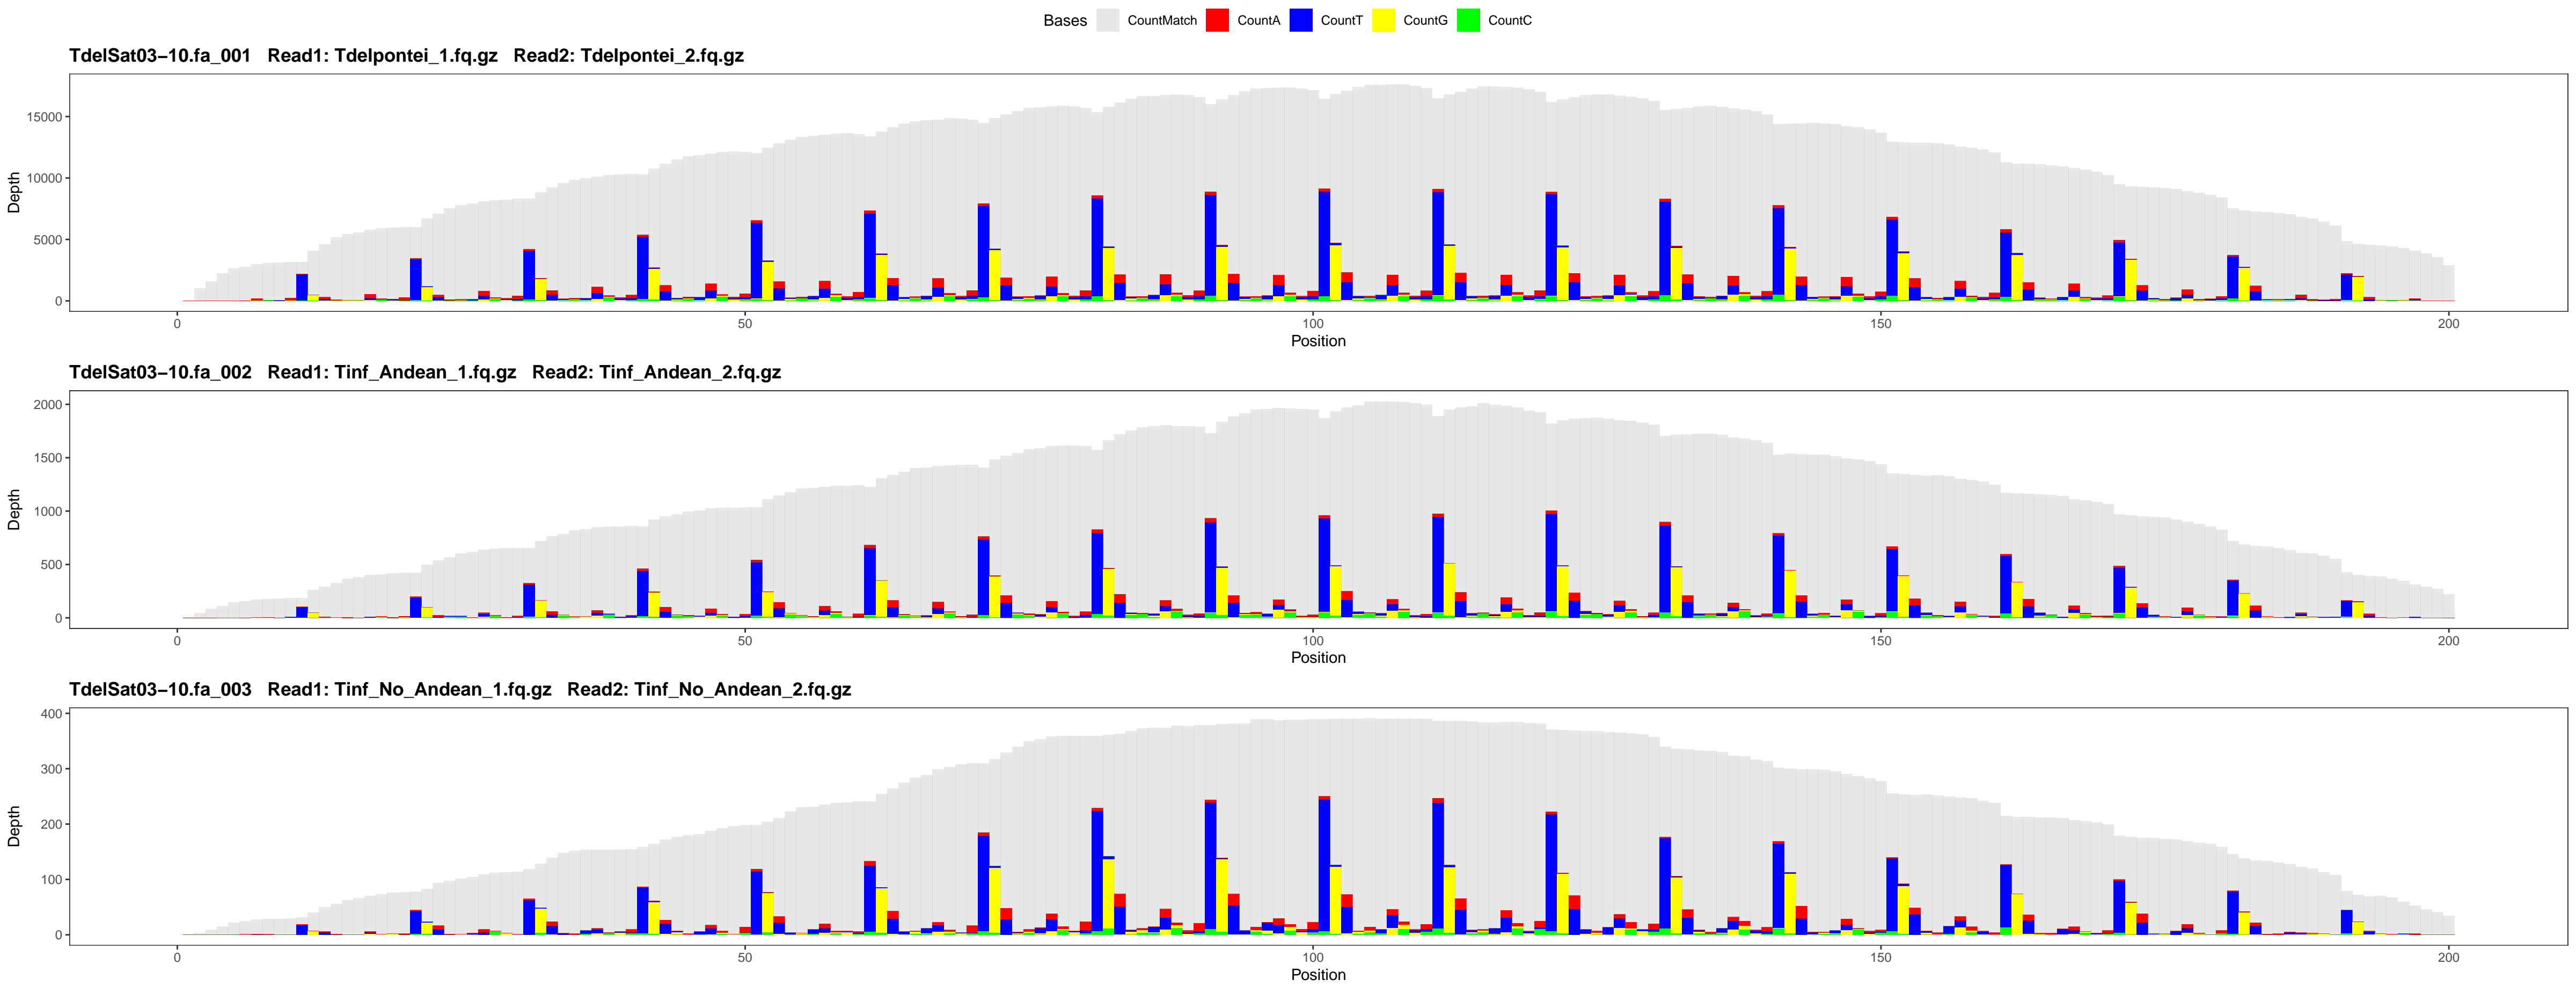

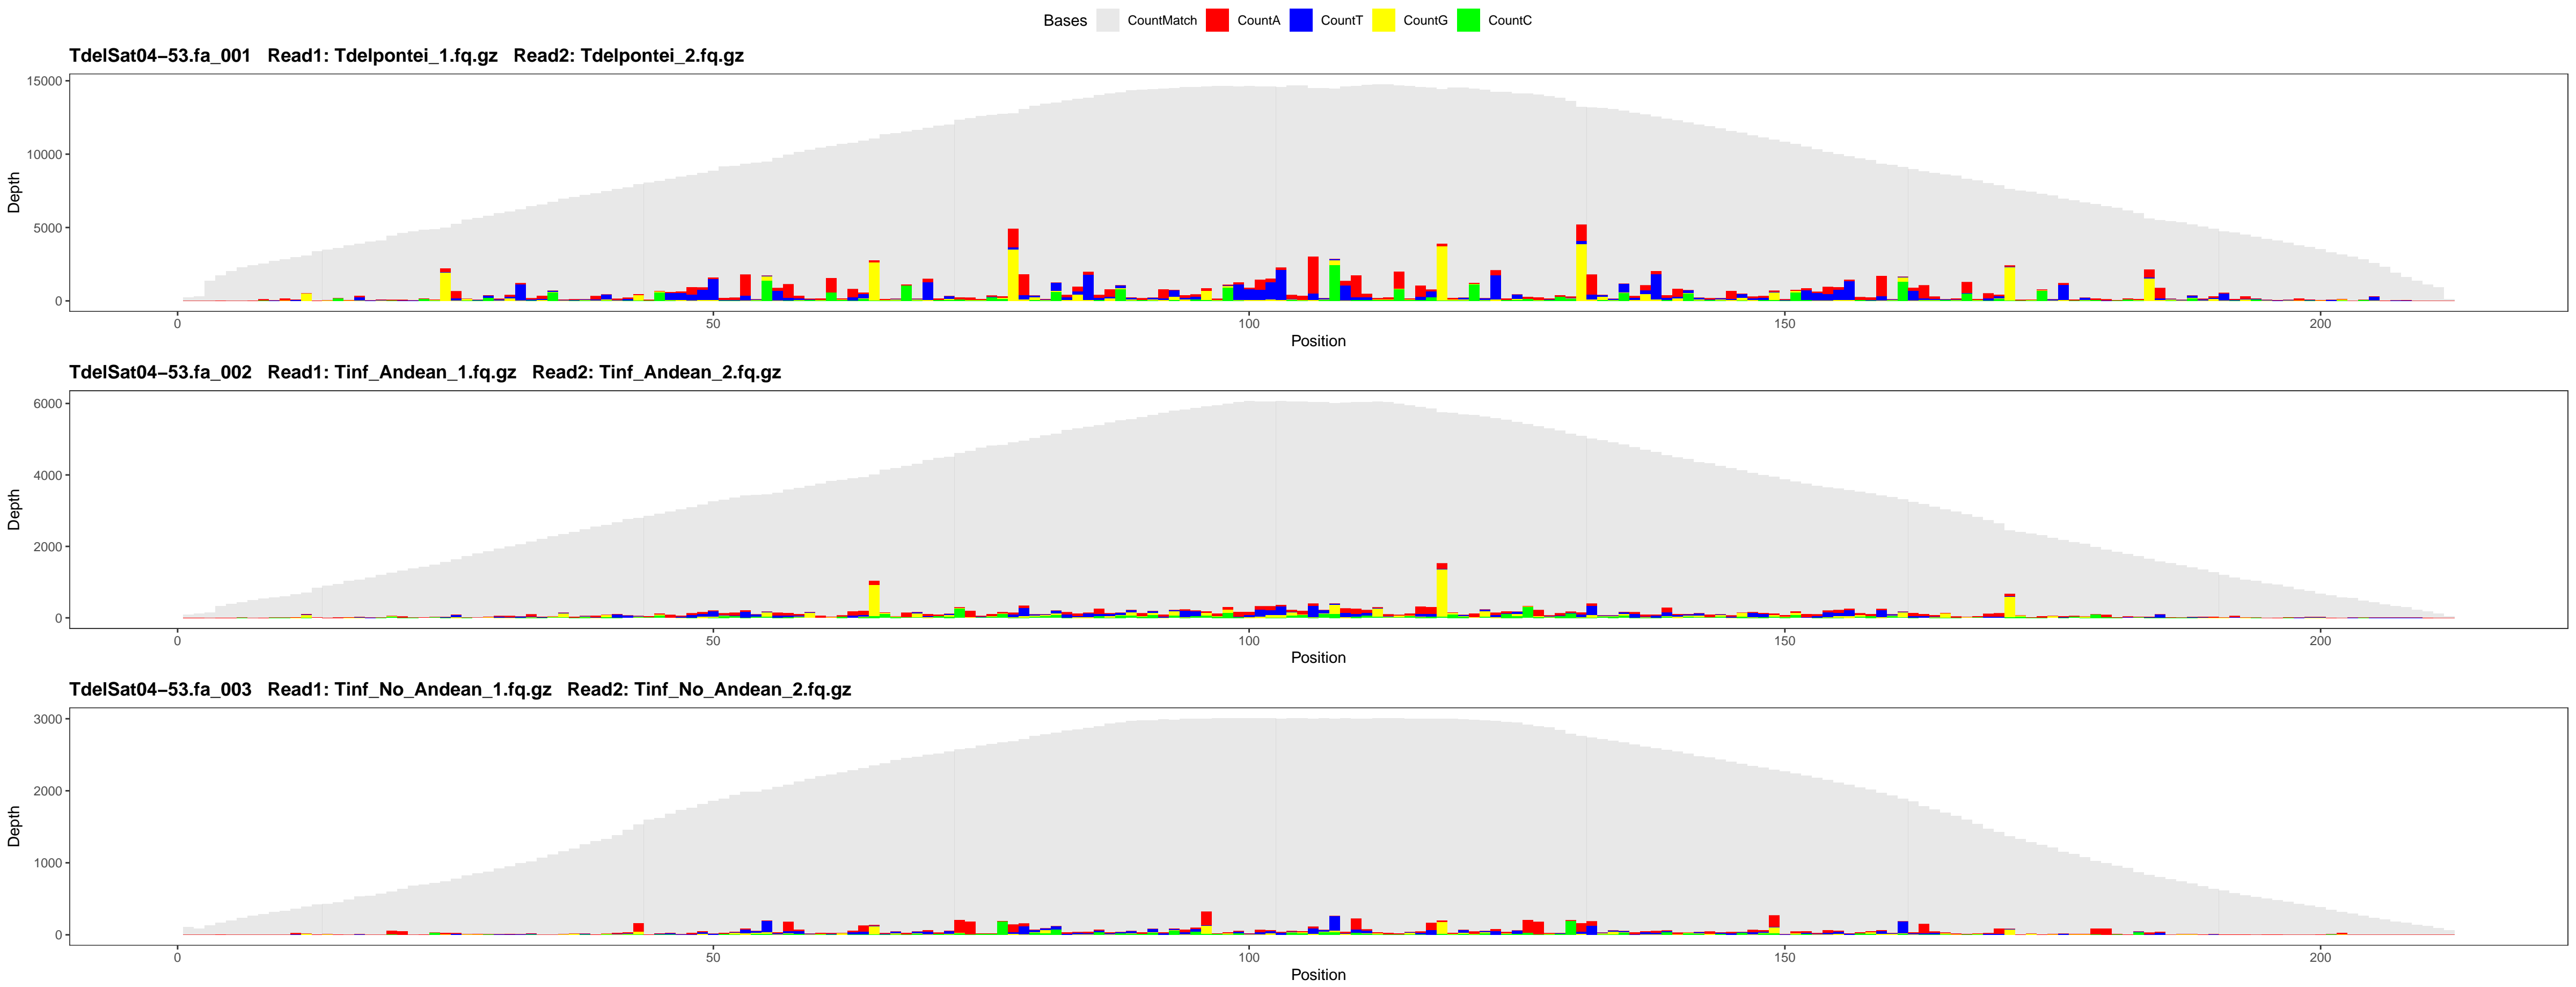

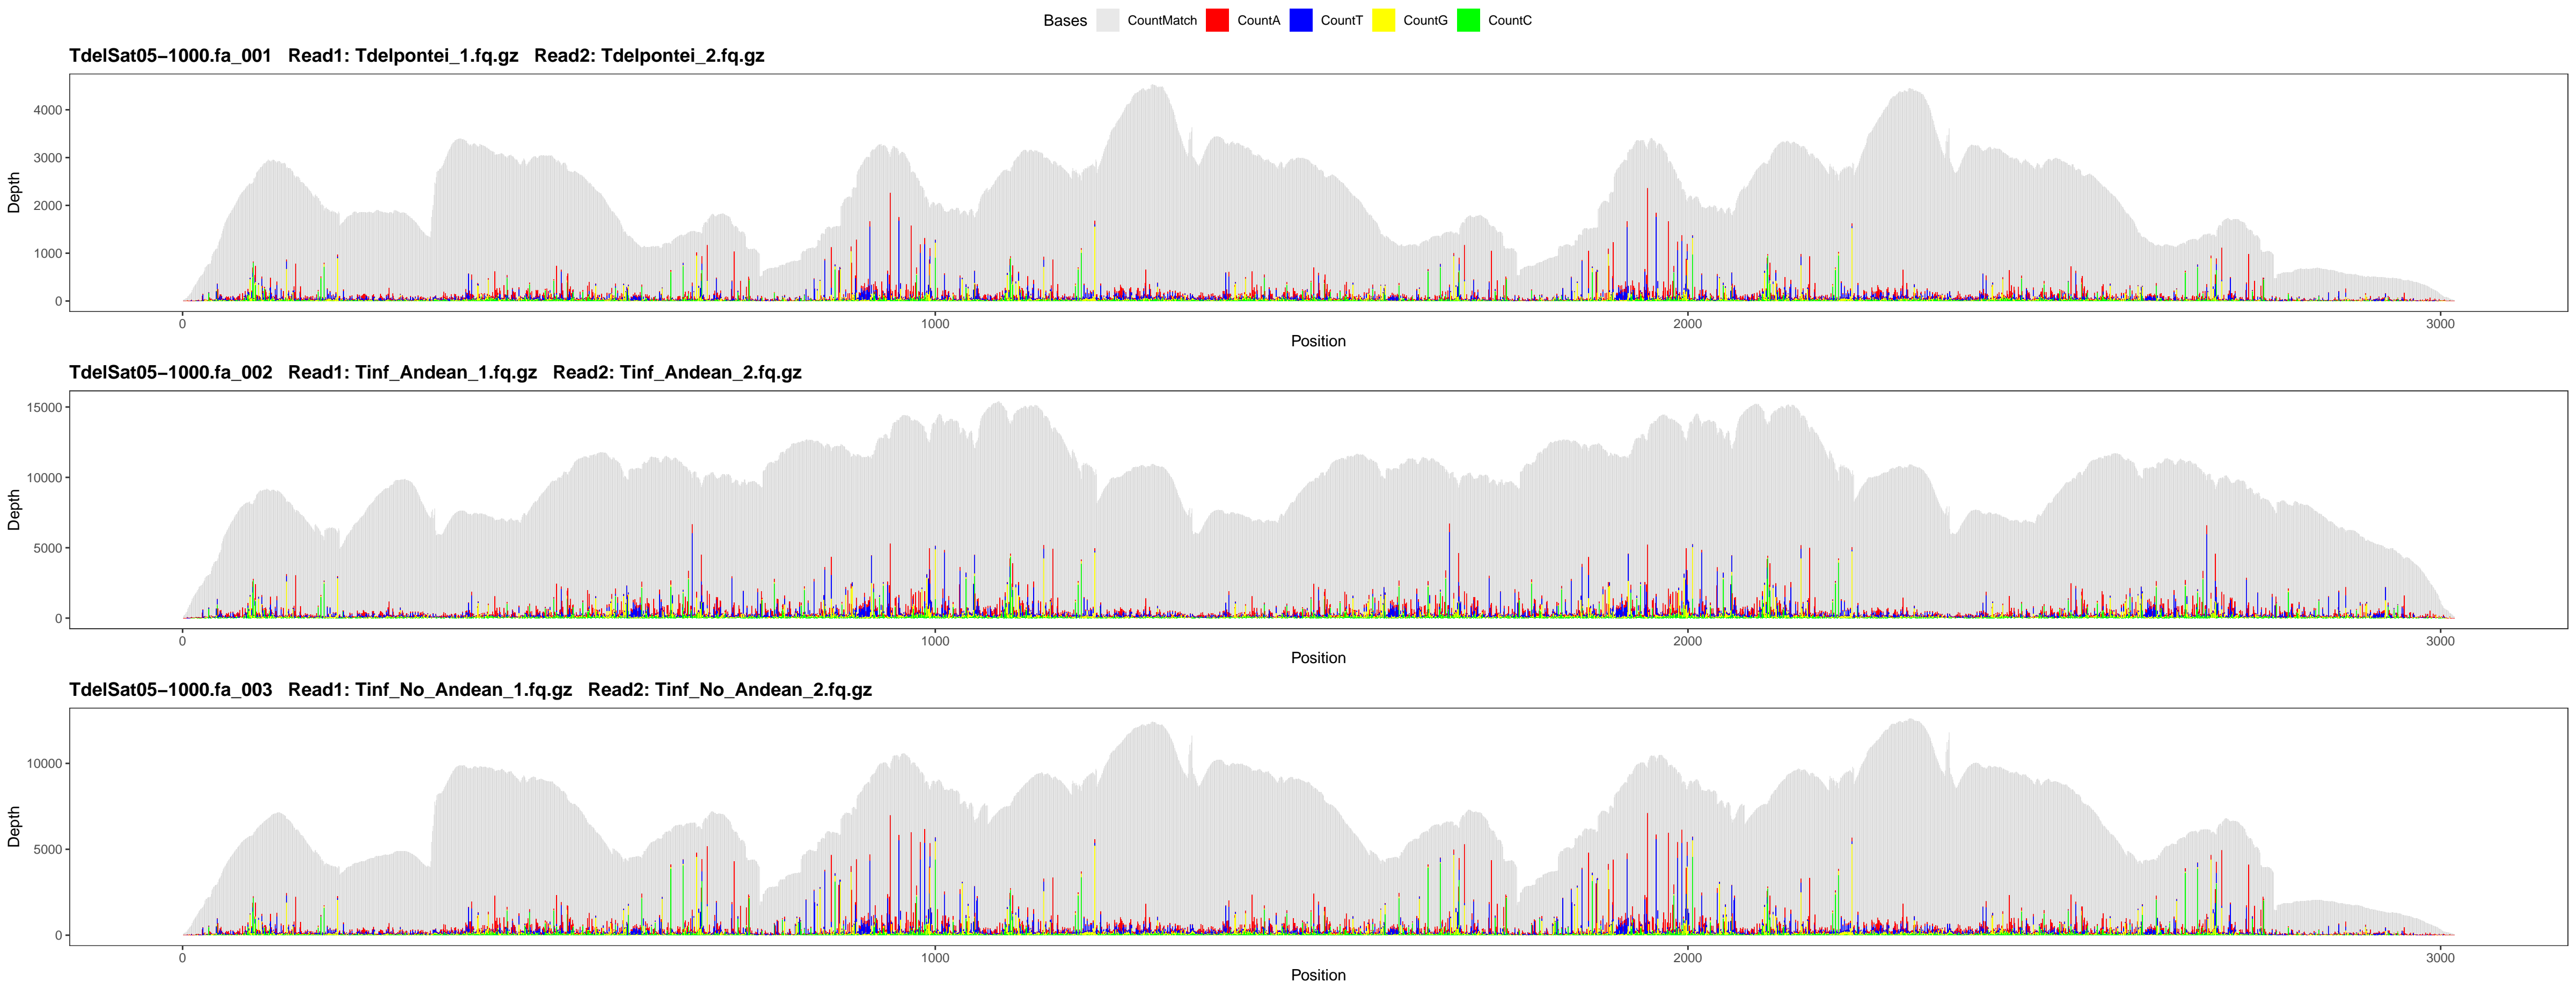

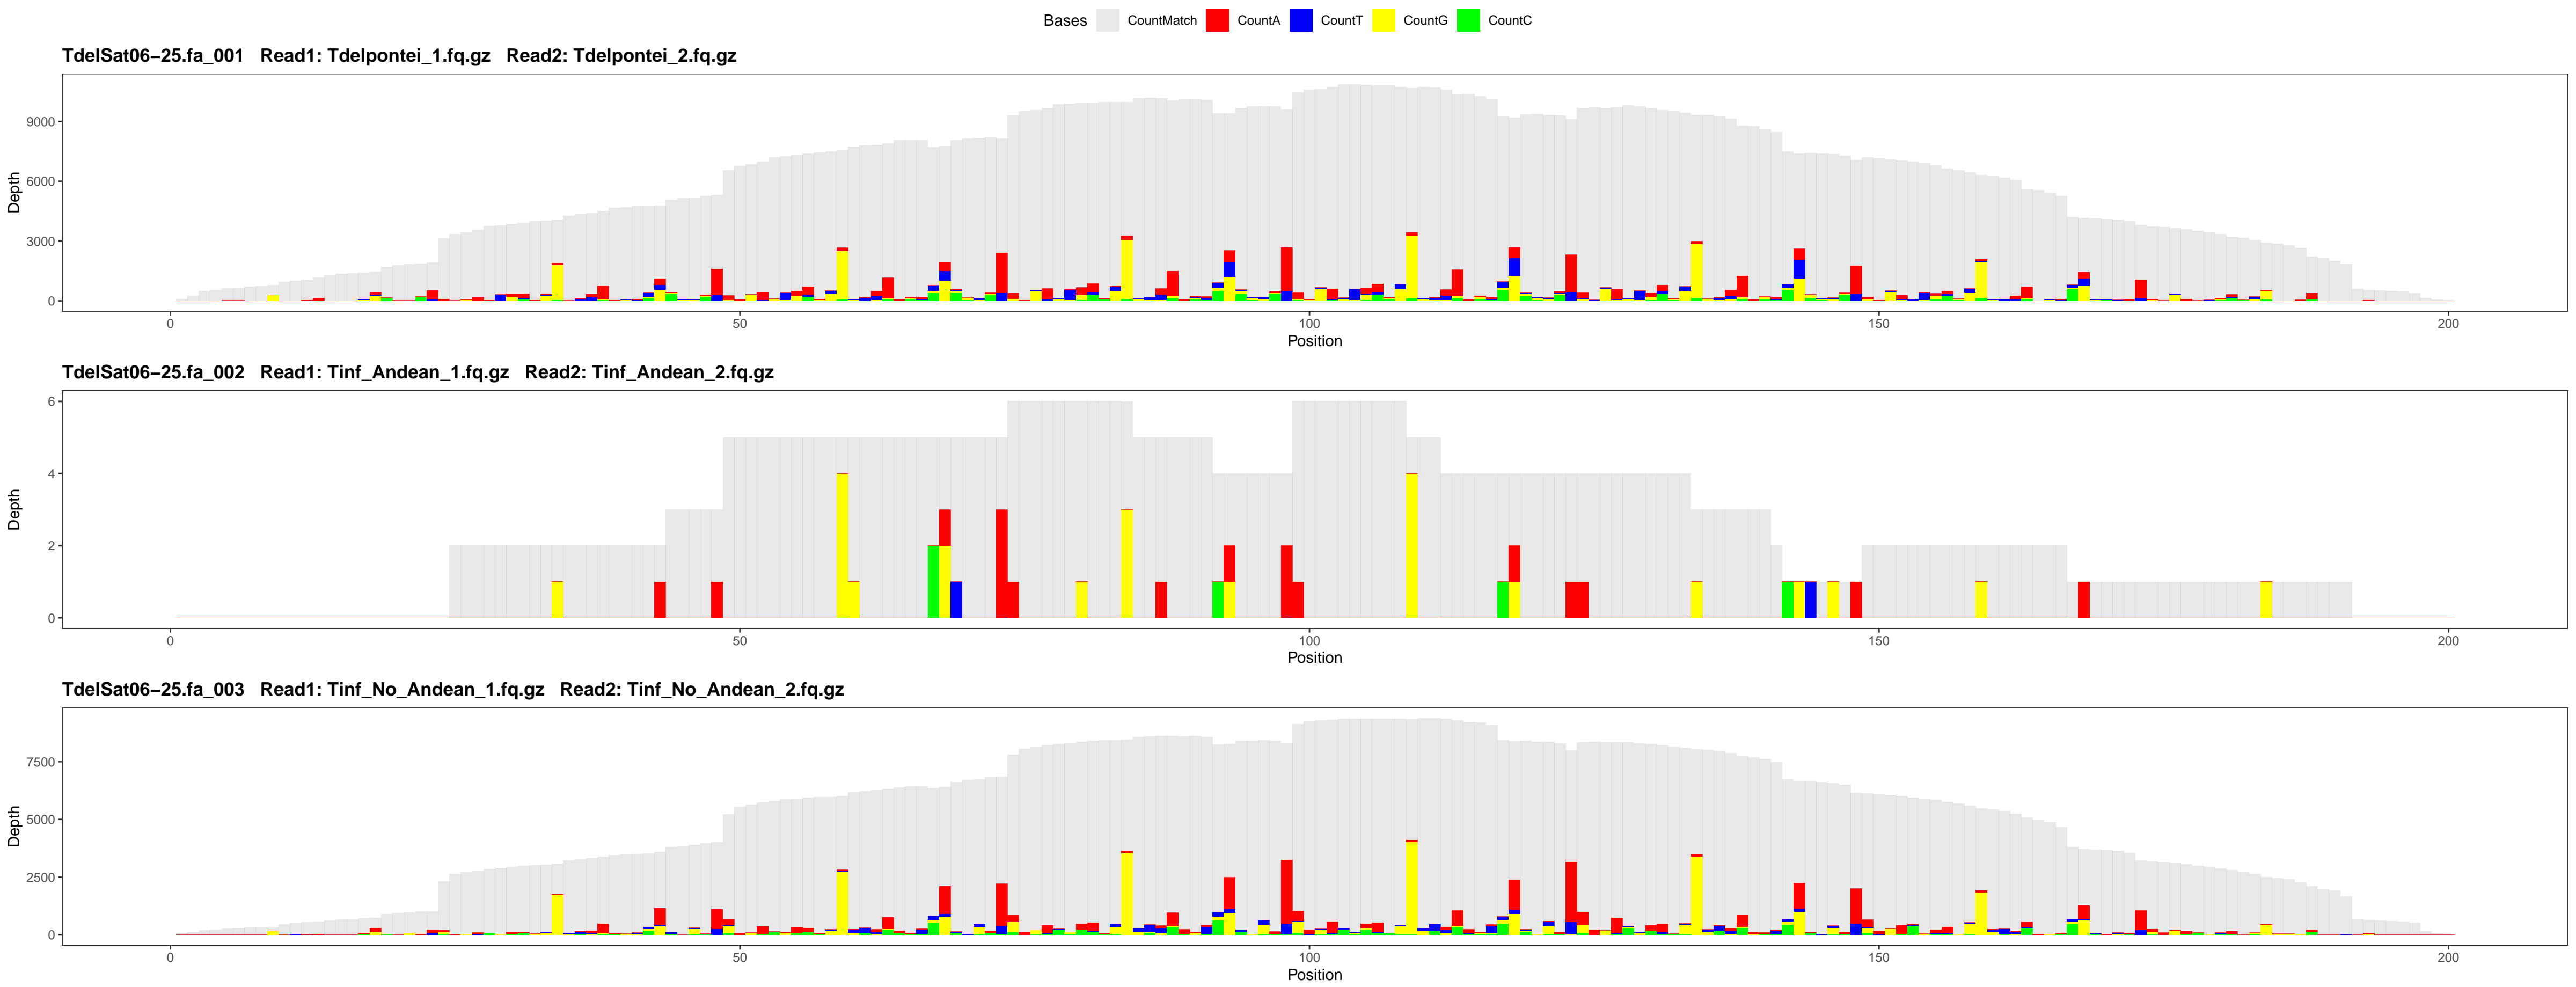



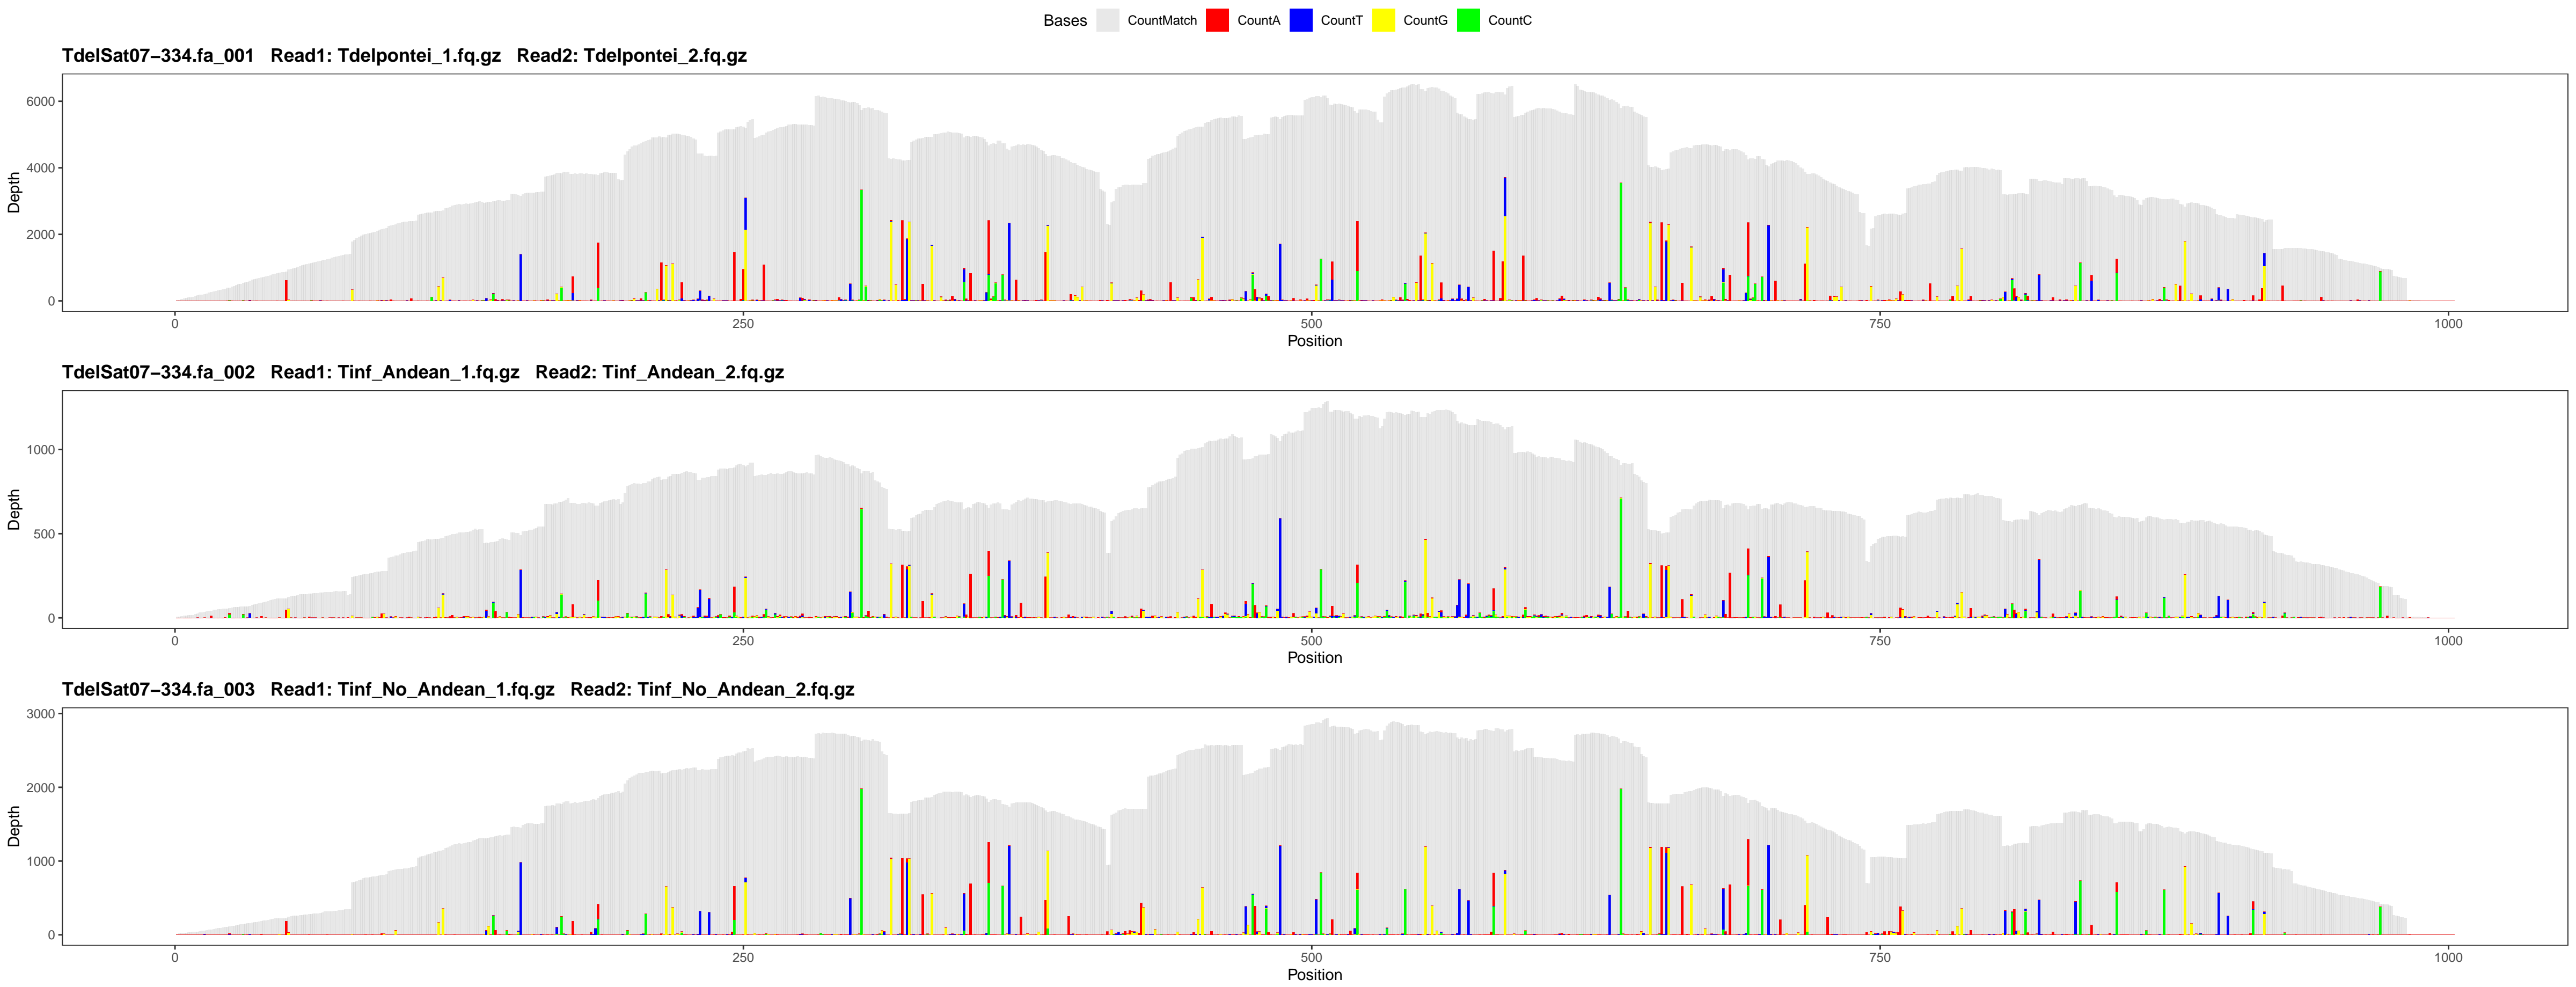

Bases CountMatch CountA CountT CountG CountC

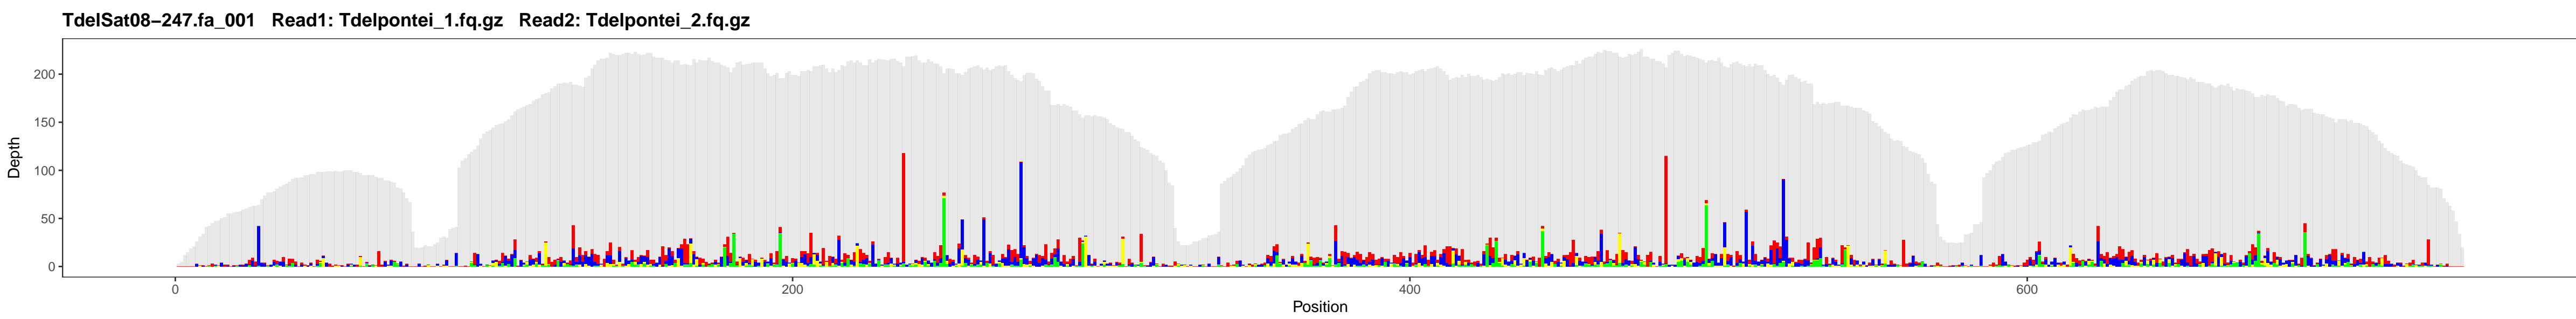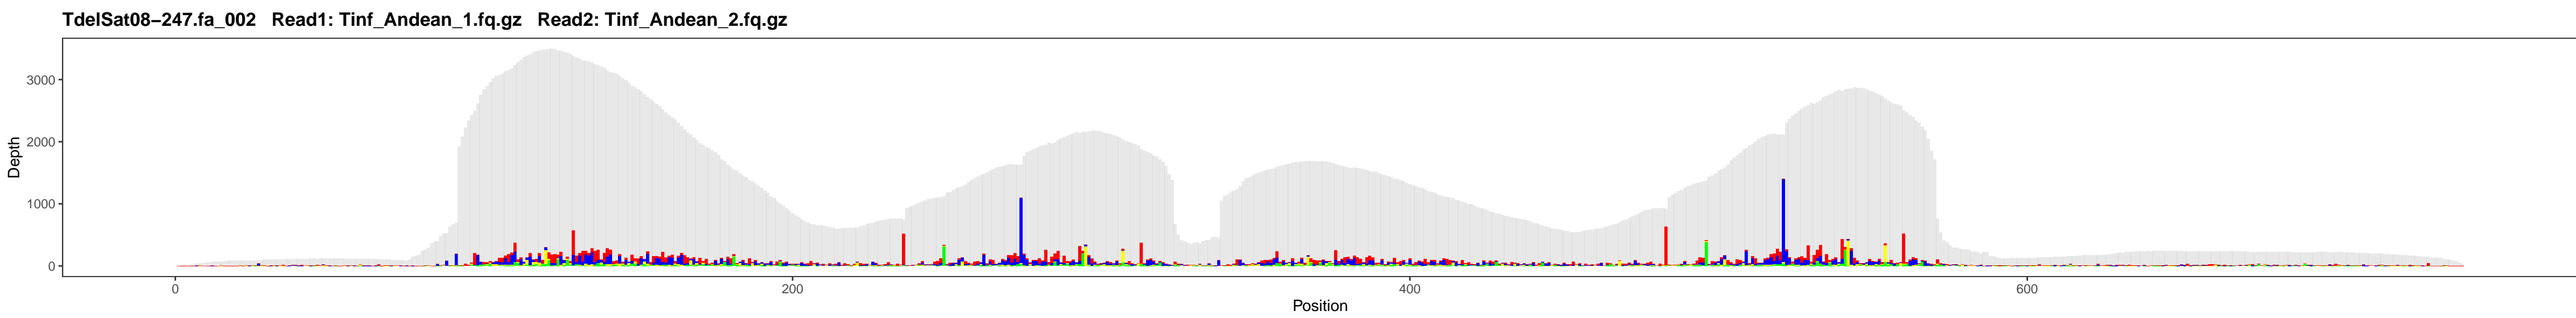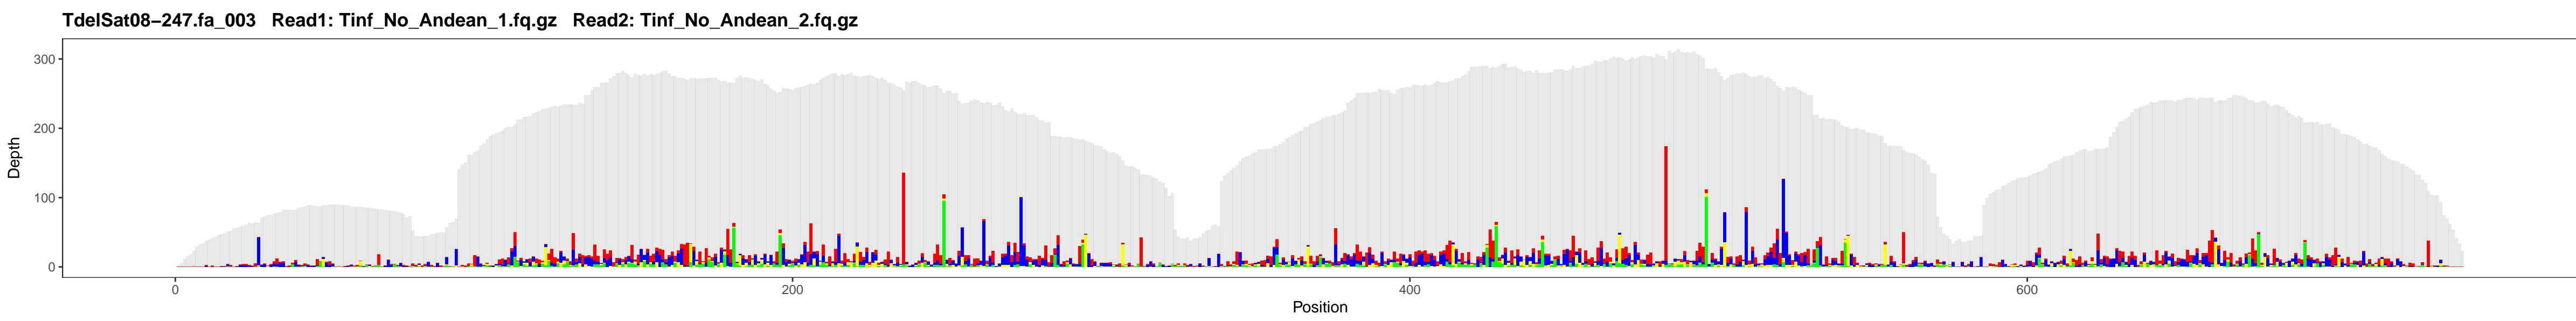

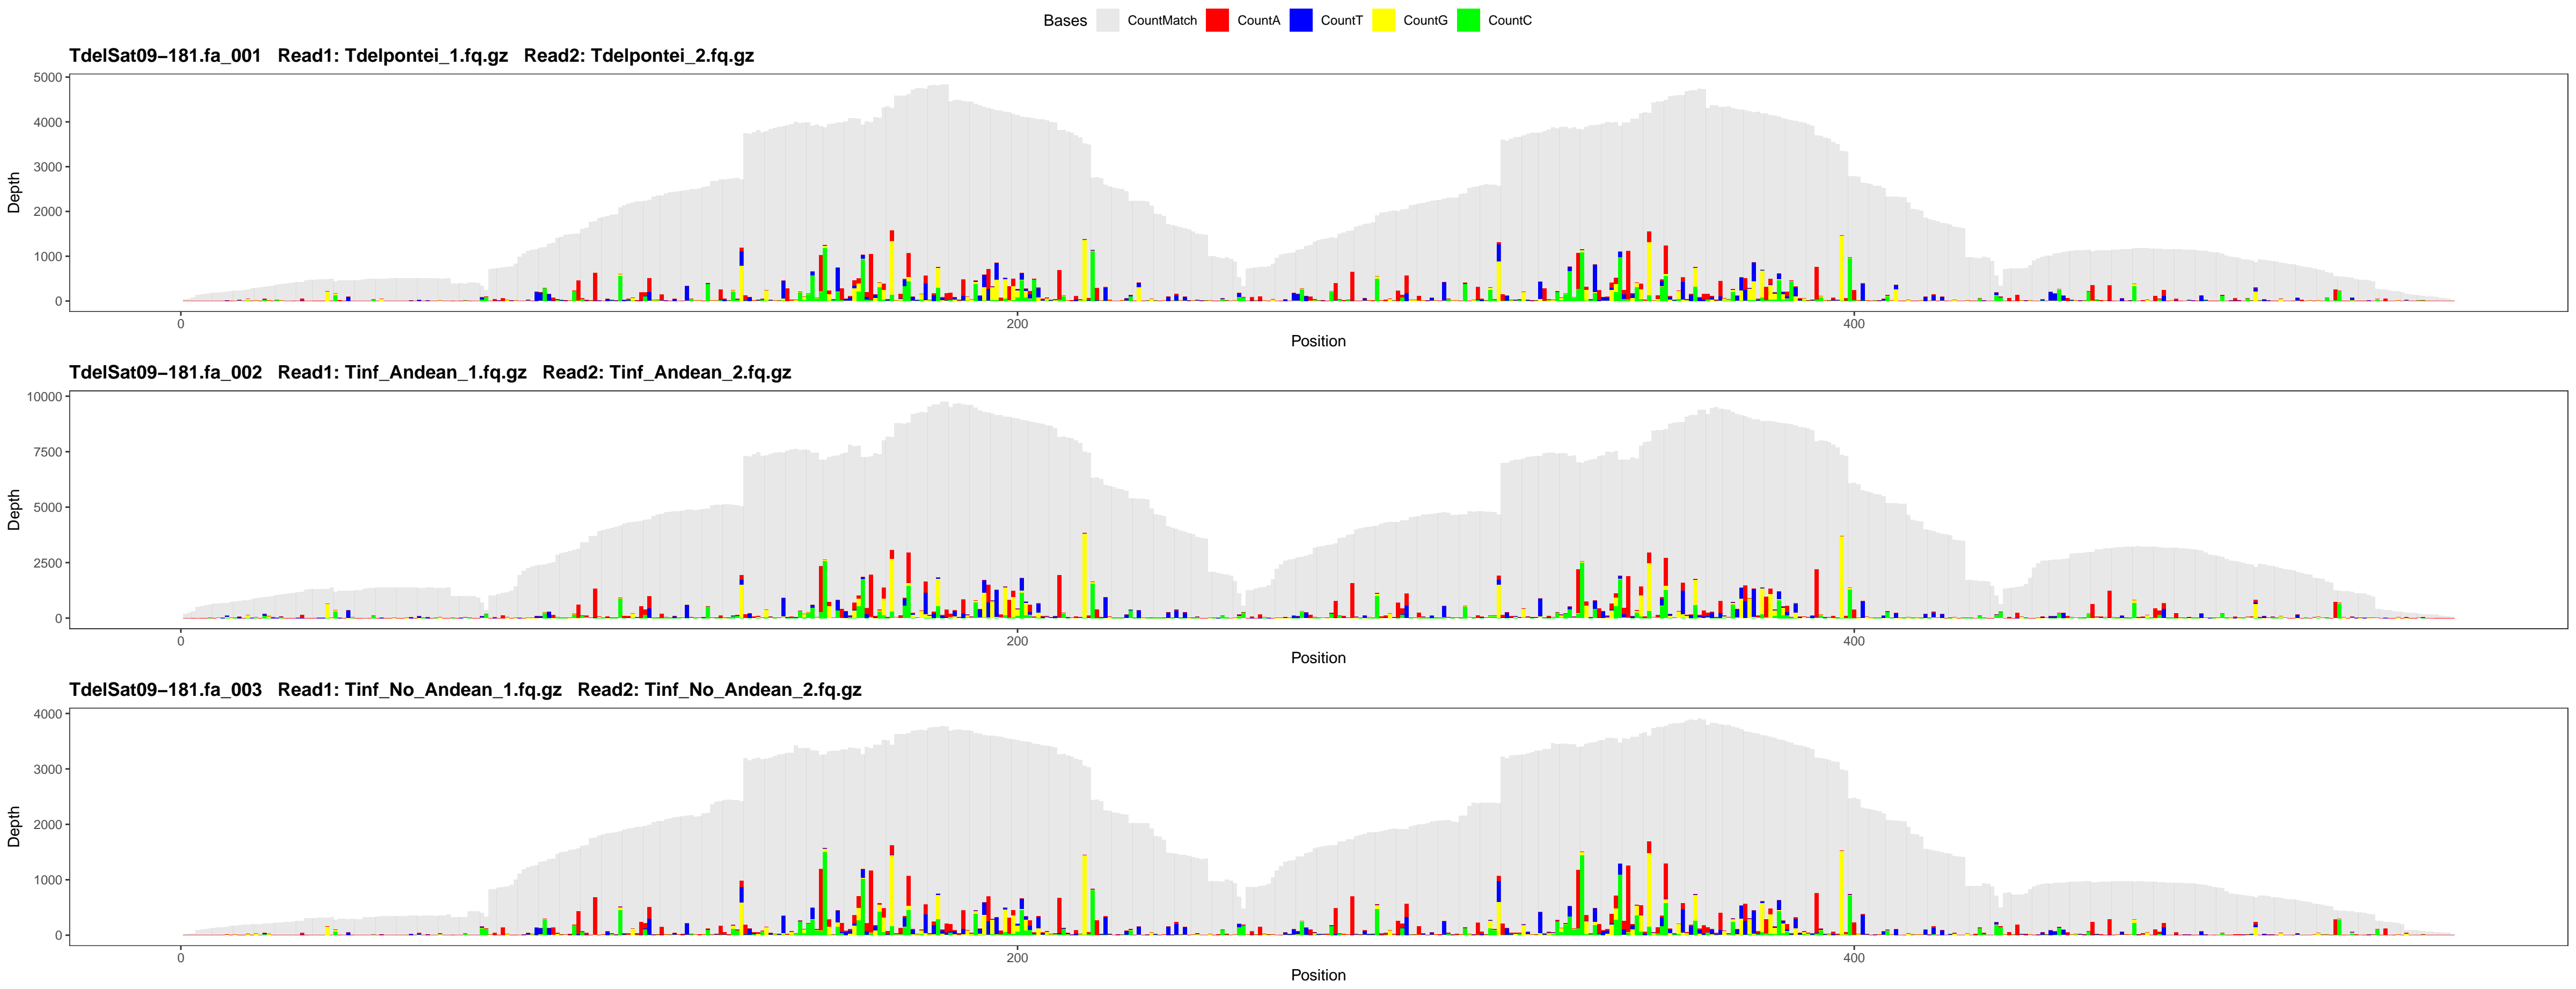

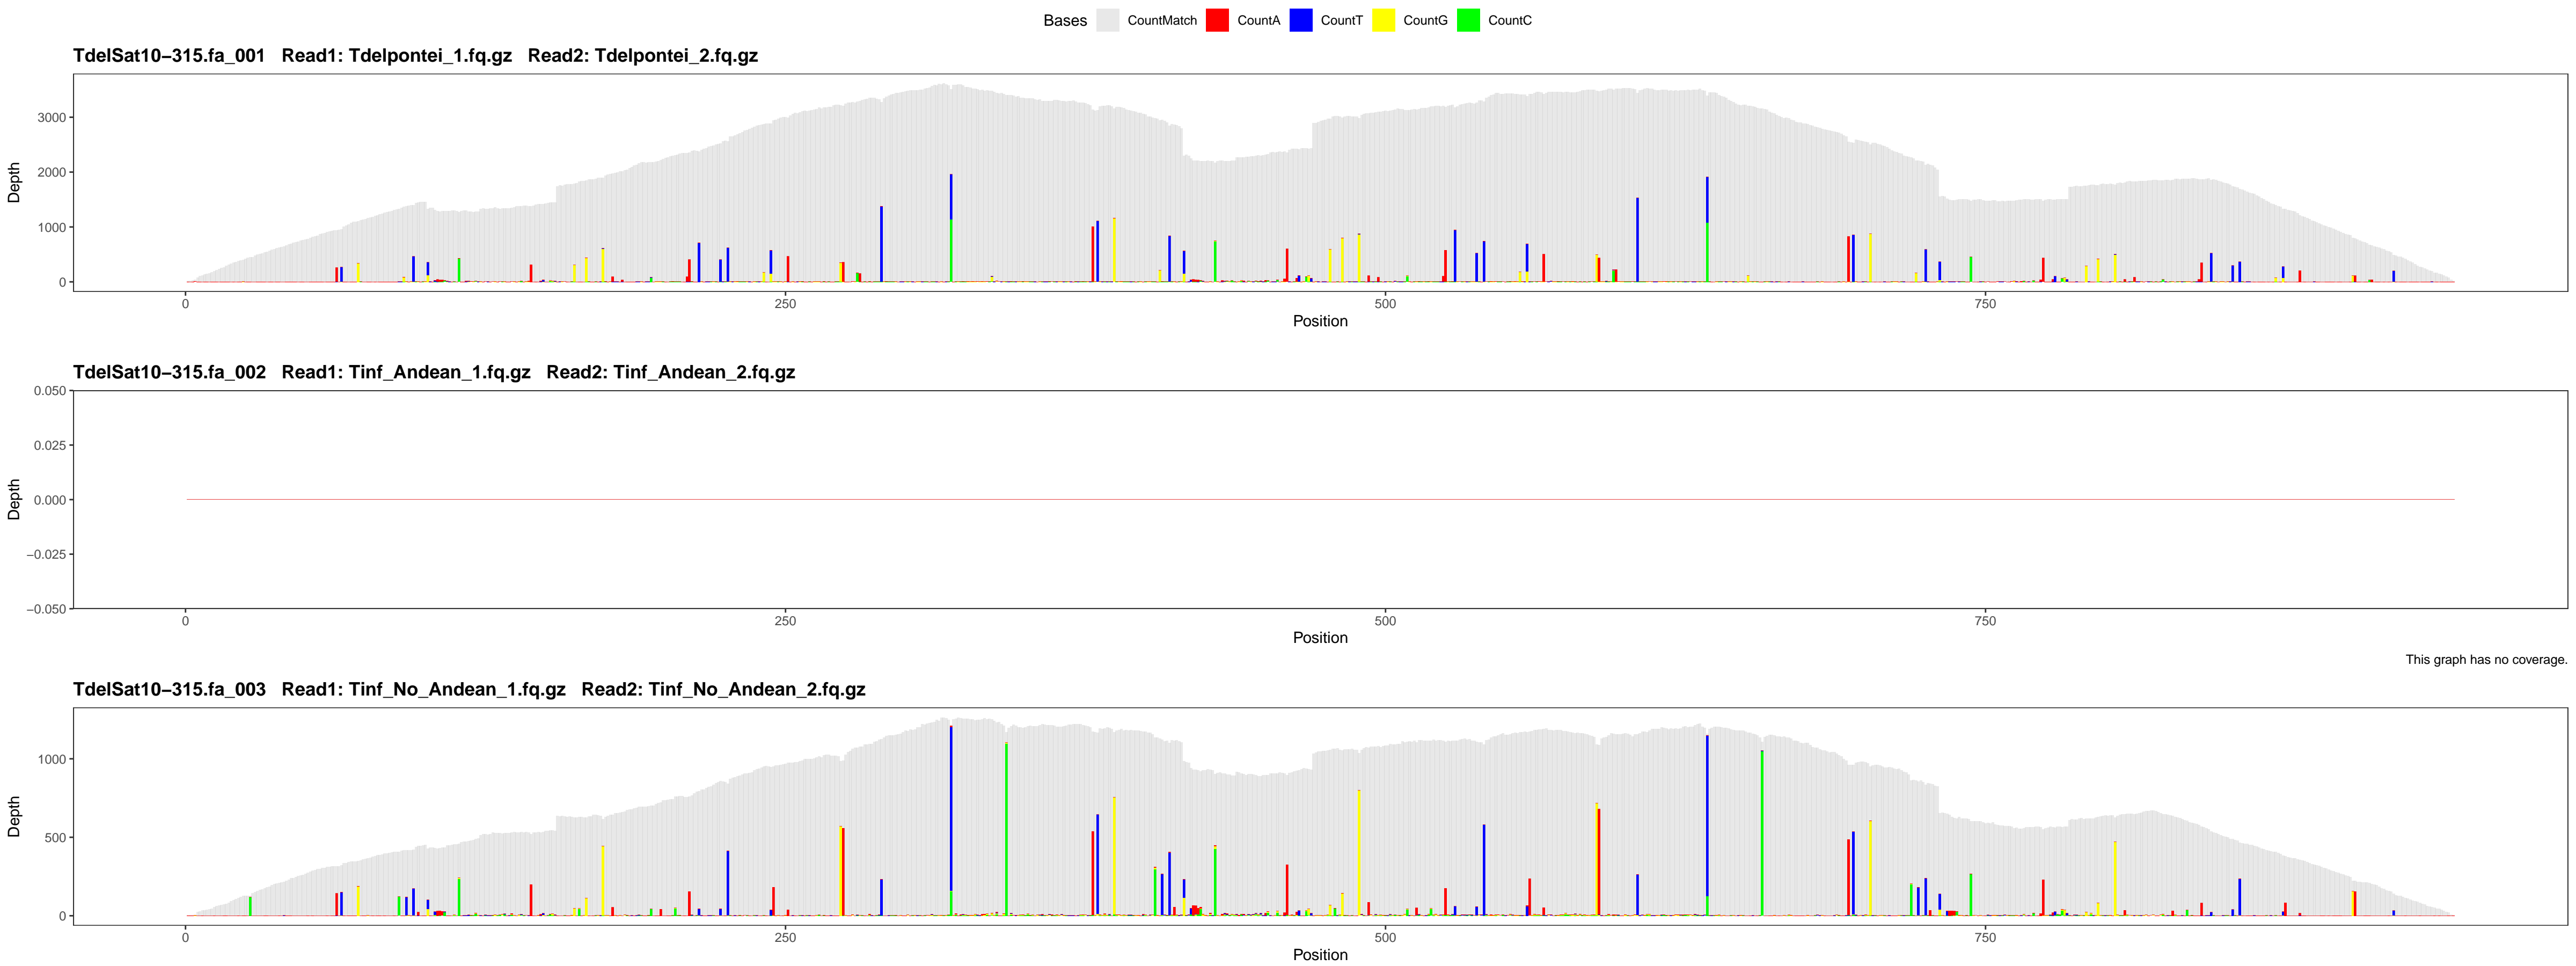

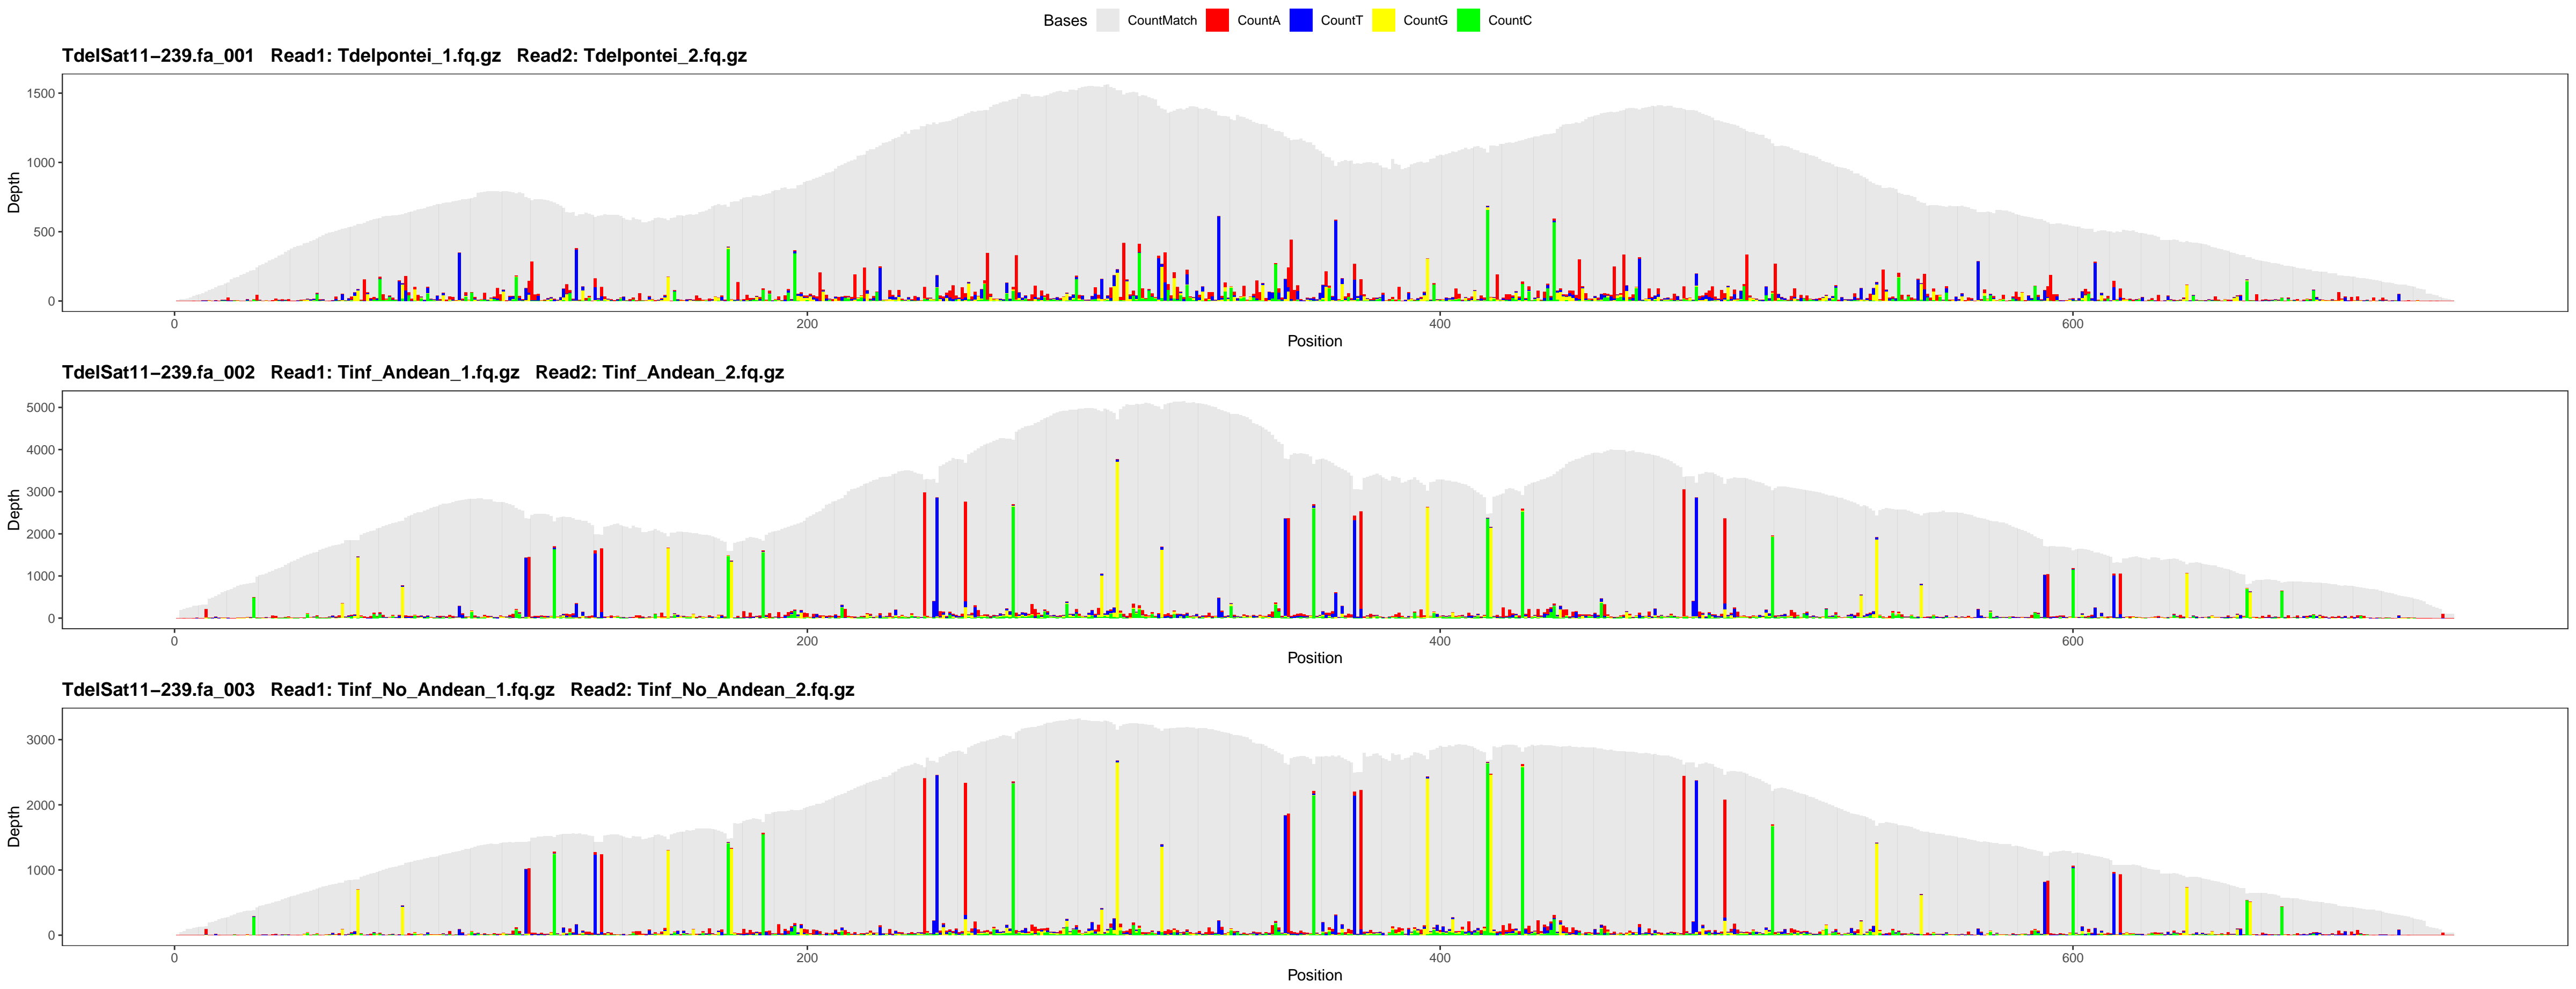

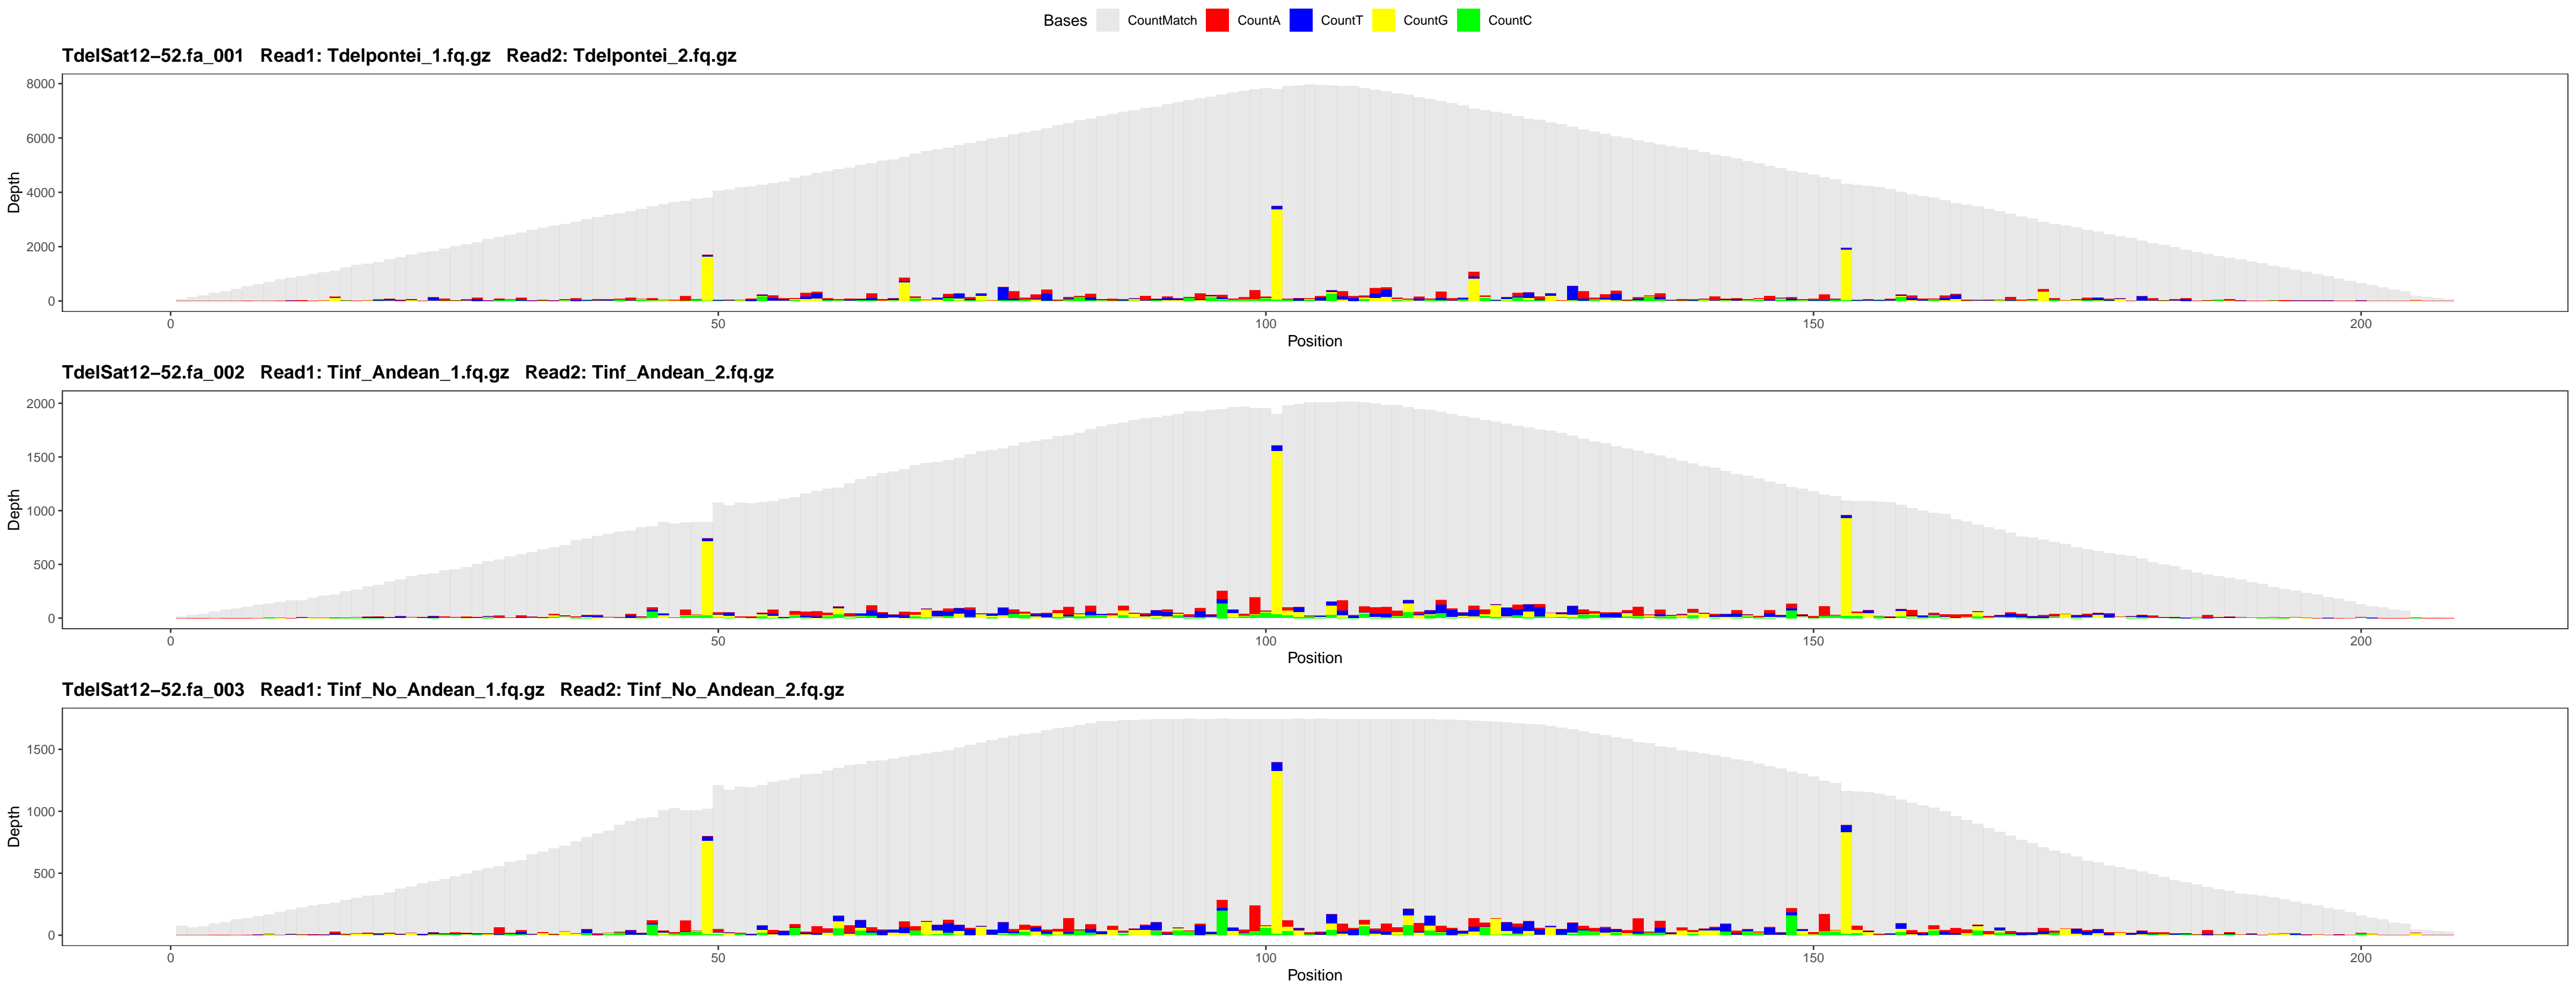

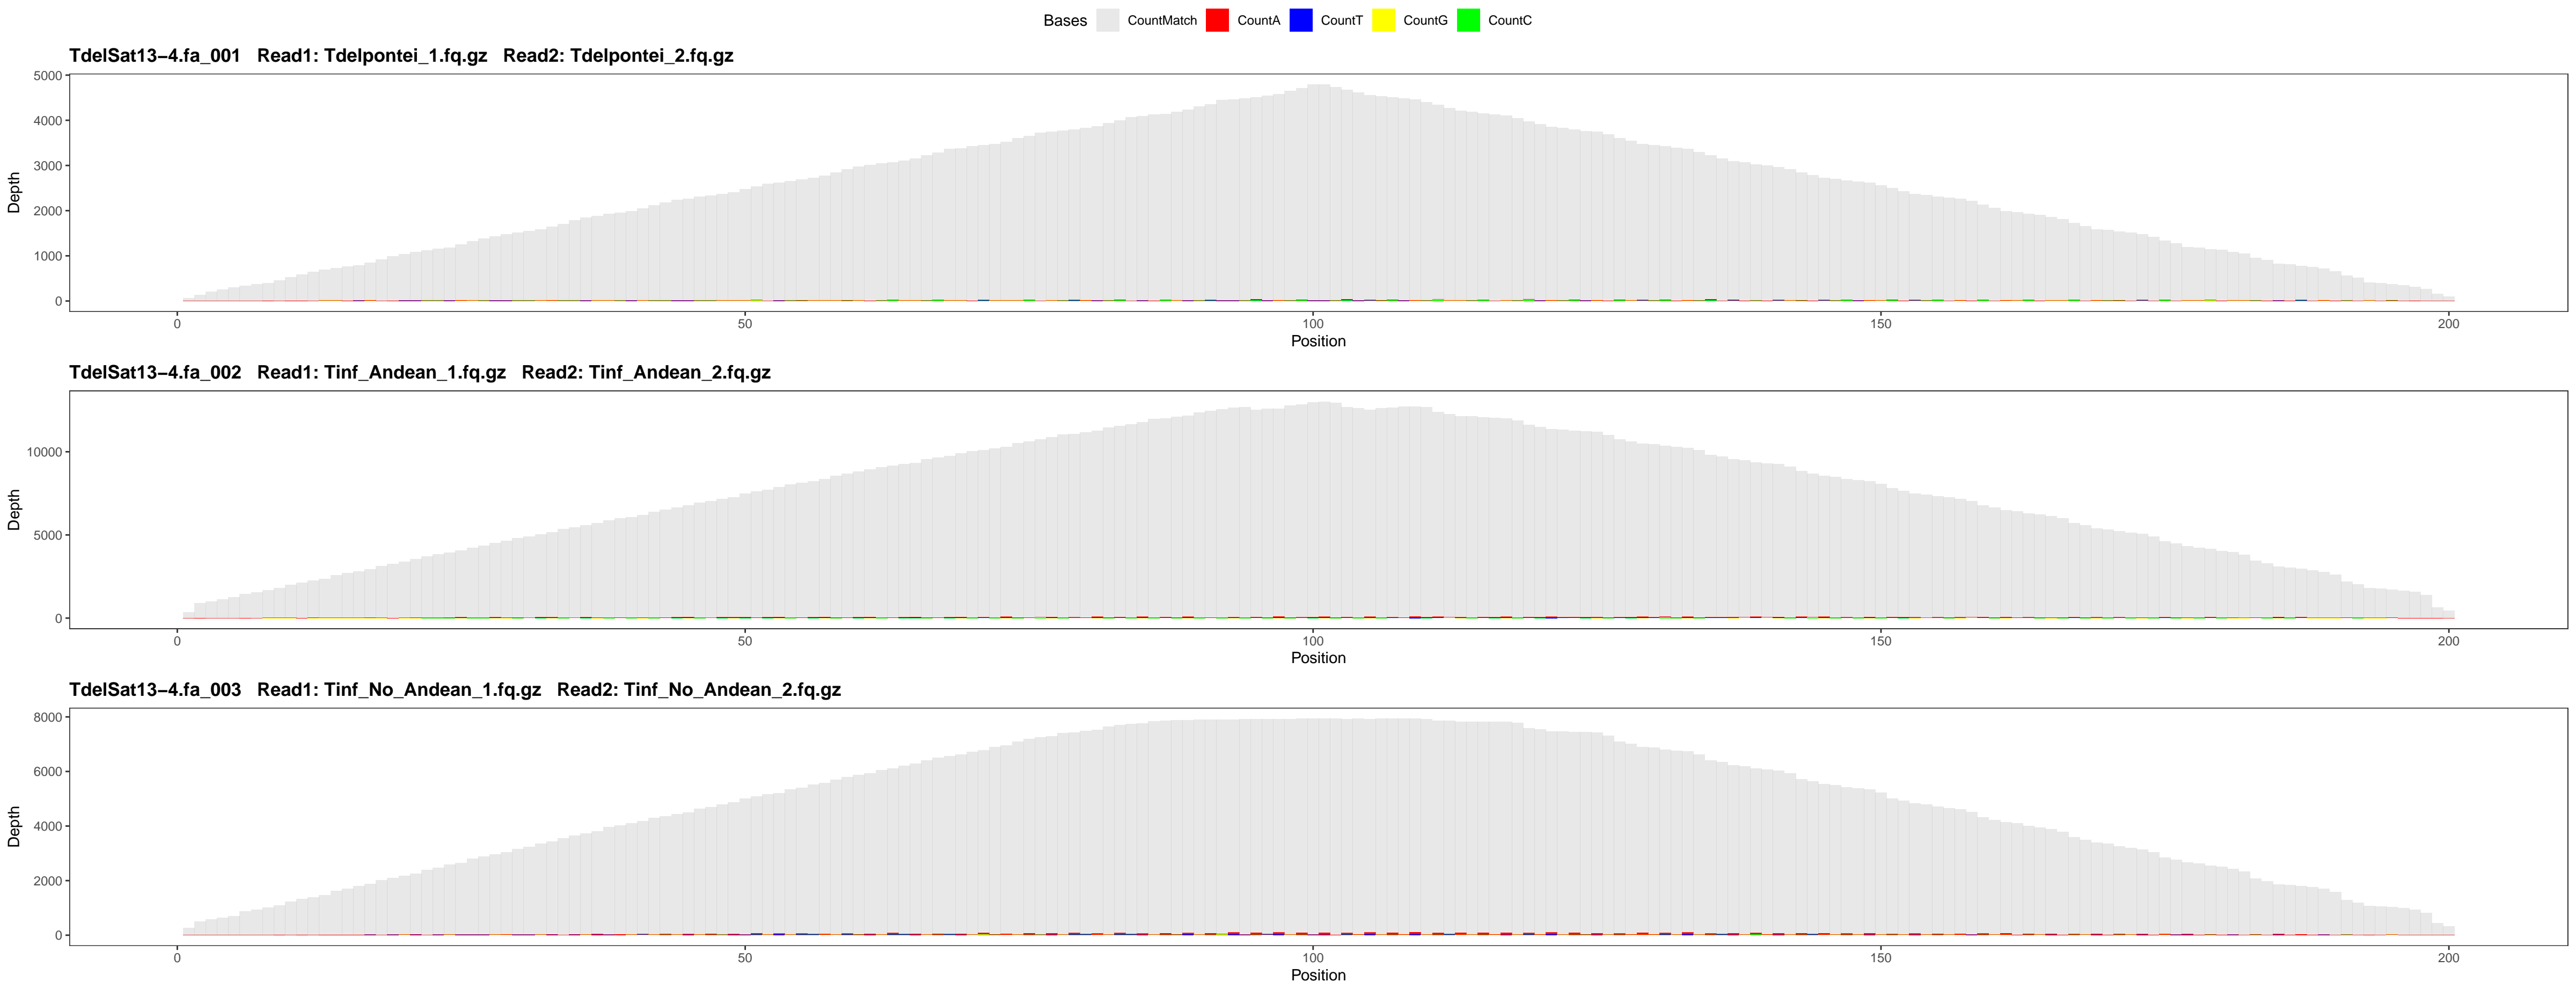

Bases CountMatch CountA CountT CountG CountC

TdelSat14-94.fa\_001 Read1: Tdelpontei\_1.fq.gz Read2: Tdelpontei\_2.fq.gz

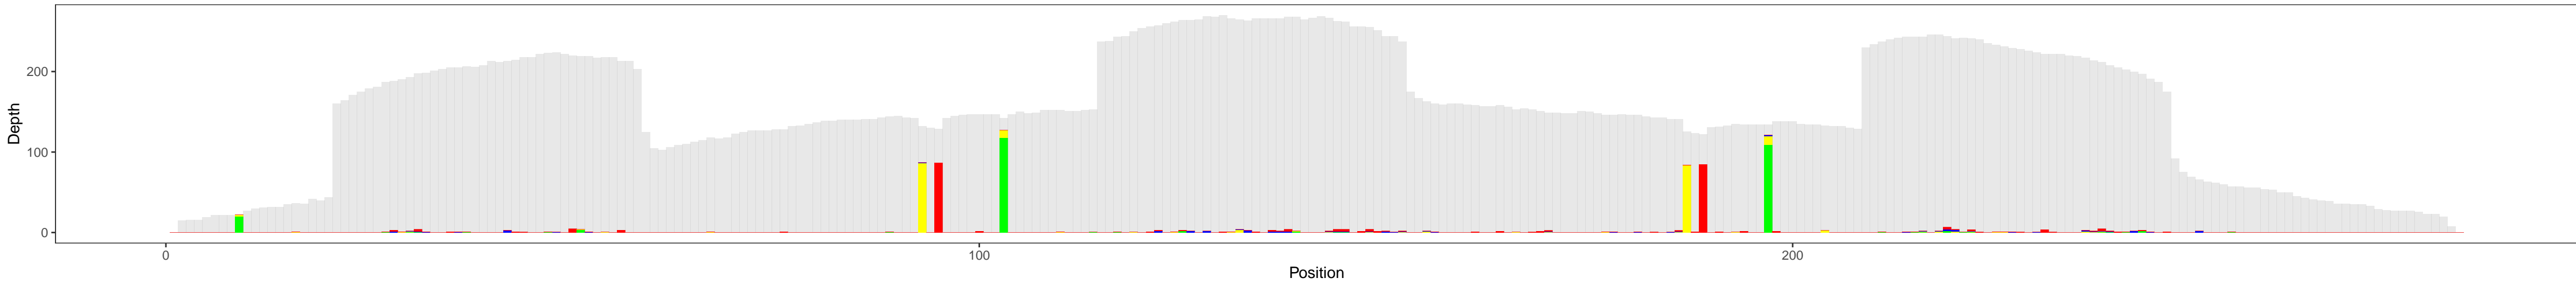

TdelSat14-94.fa\_002 Read1: Tinf\_Andean\_1.fq.gz Read2: Tinf\_Andean\_2.fq.gz

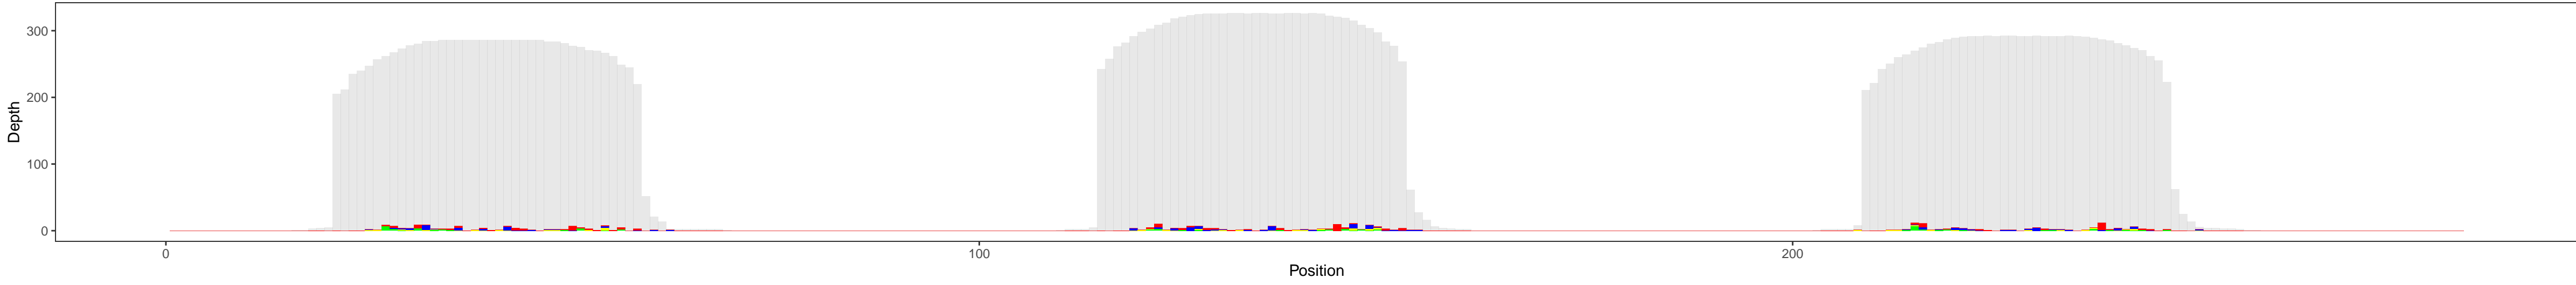

TdelSat14-94.fa\_003 Read1: Tinf\_No\_Andean\_1.fq.gz Read2: Tinf\_No\_Andean\_2.fq.gz

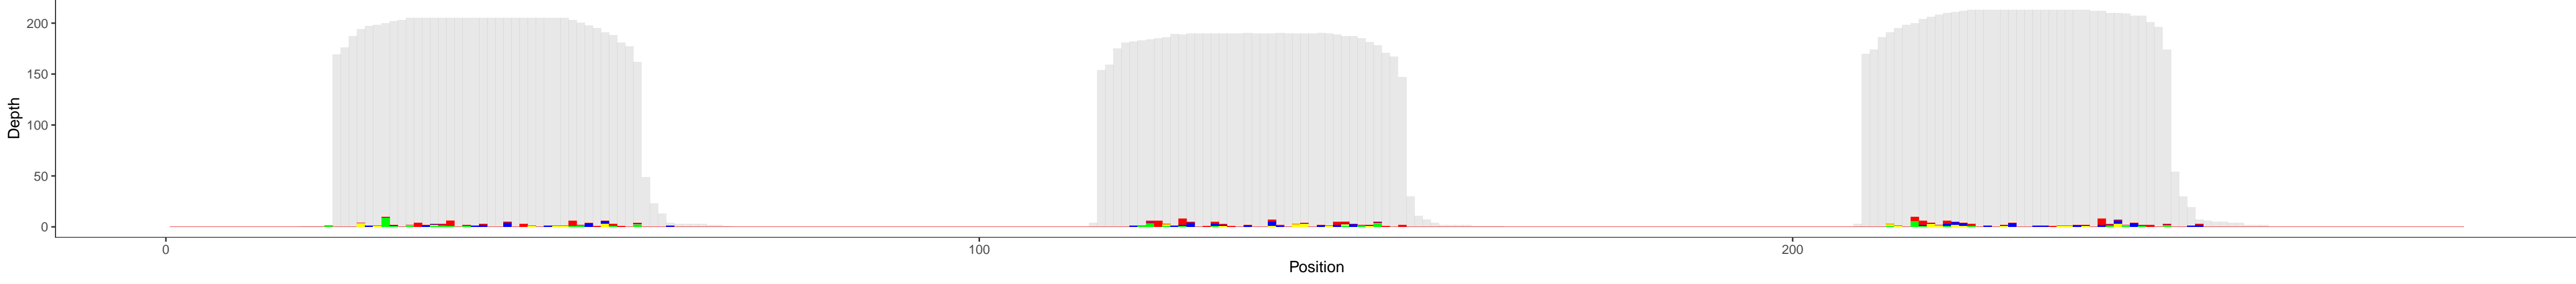



Bases CountMatch CountA CountT CountG CountC

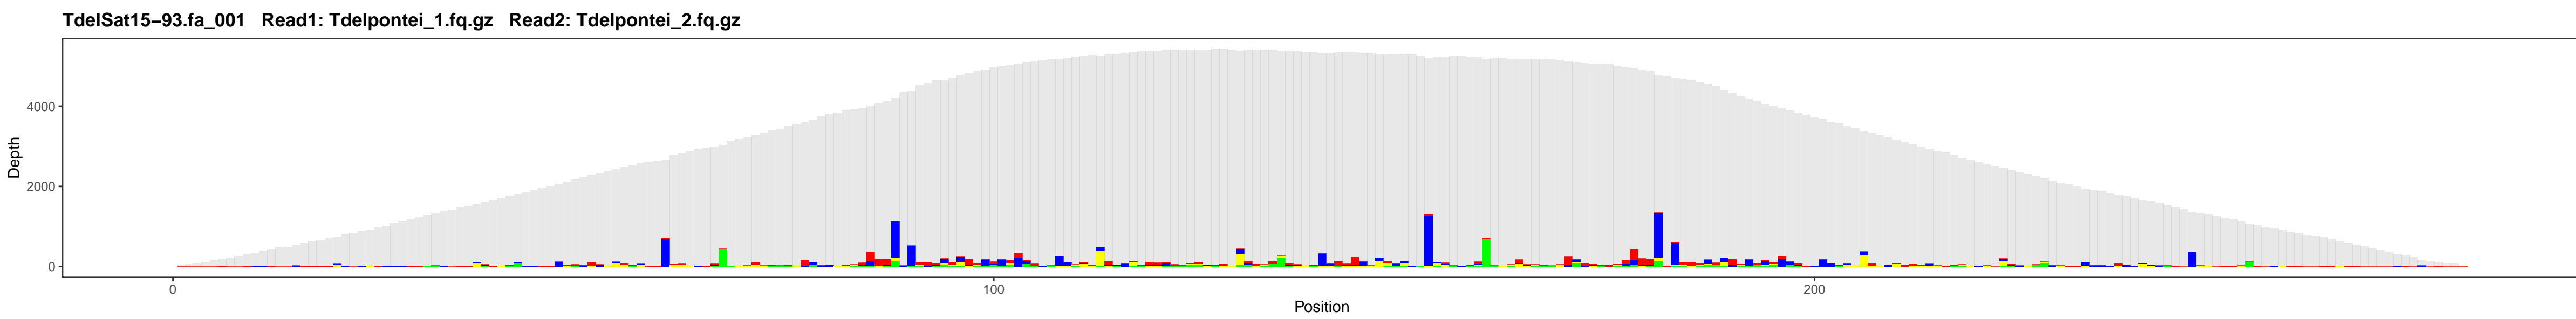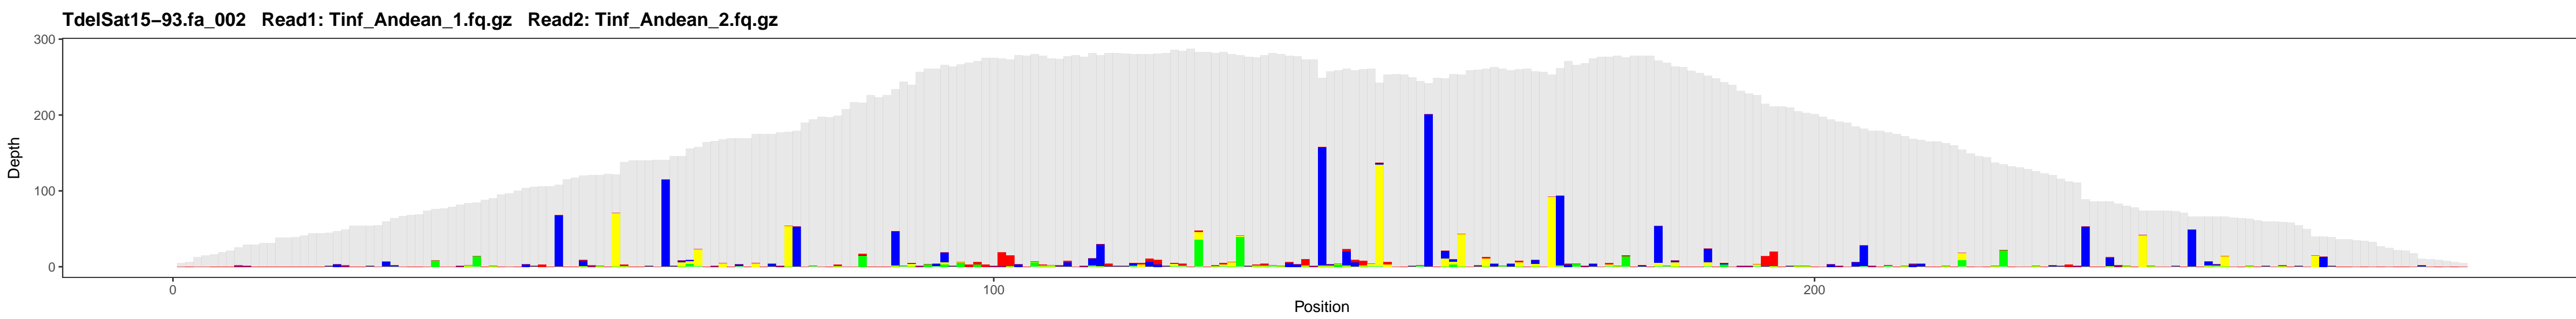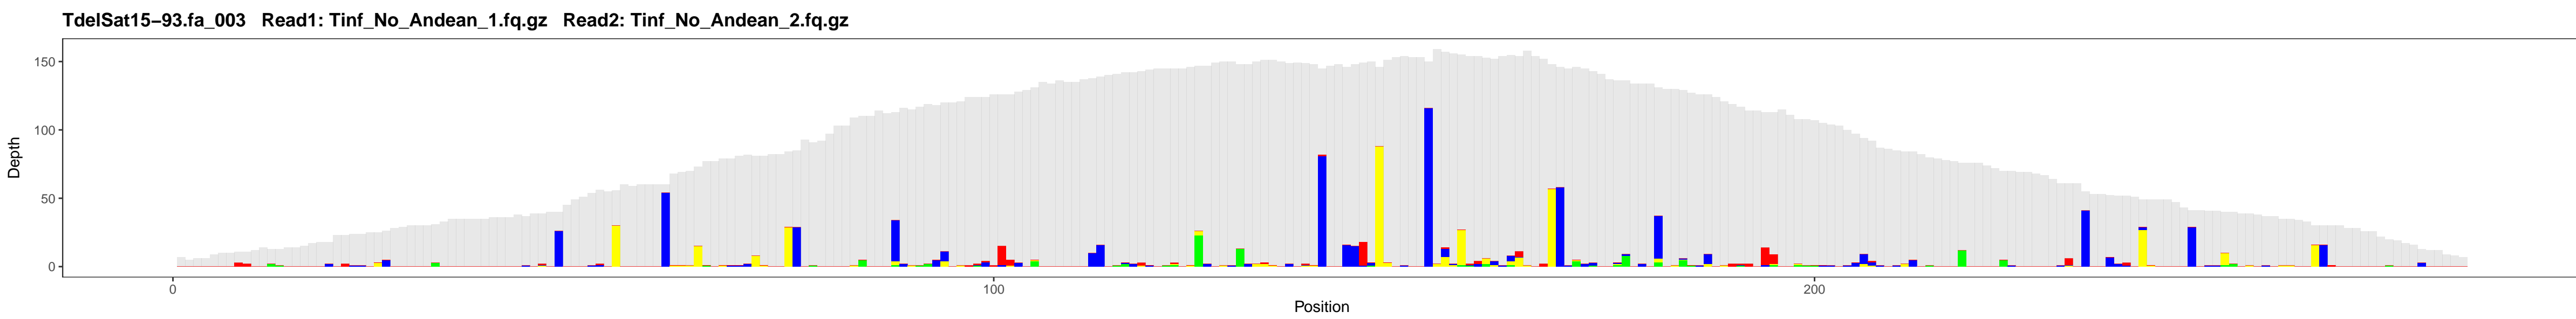

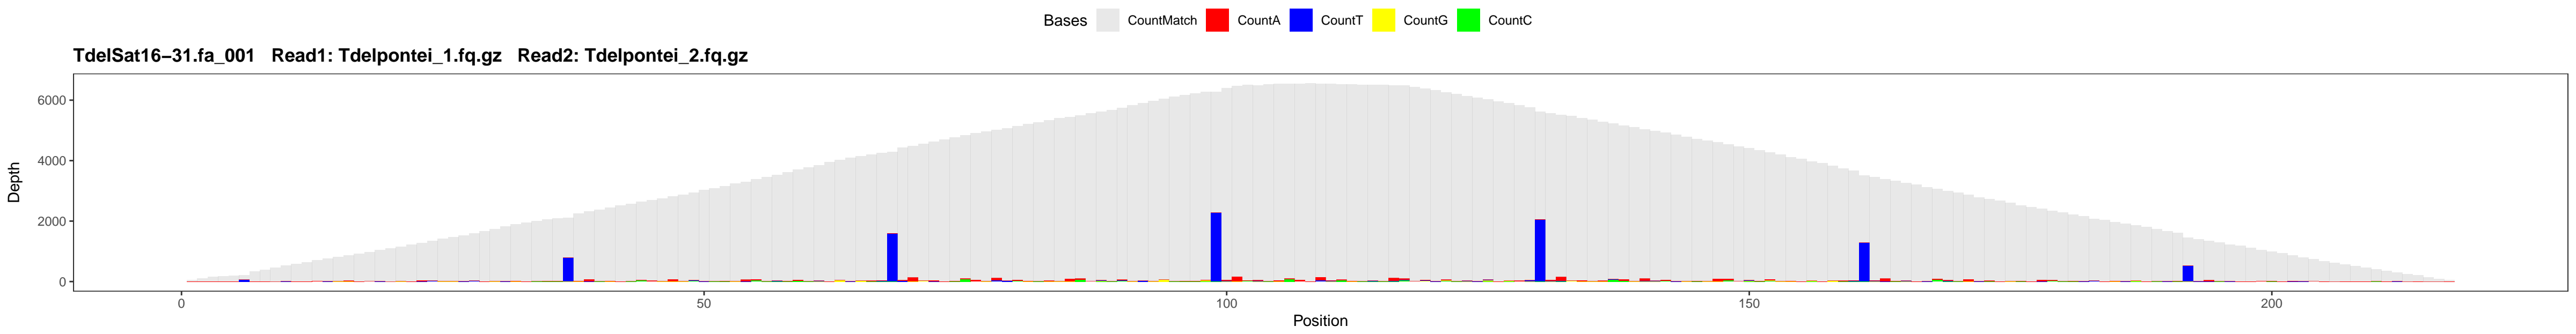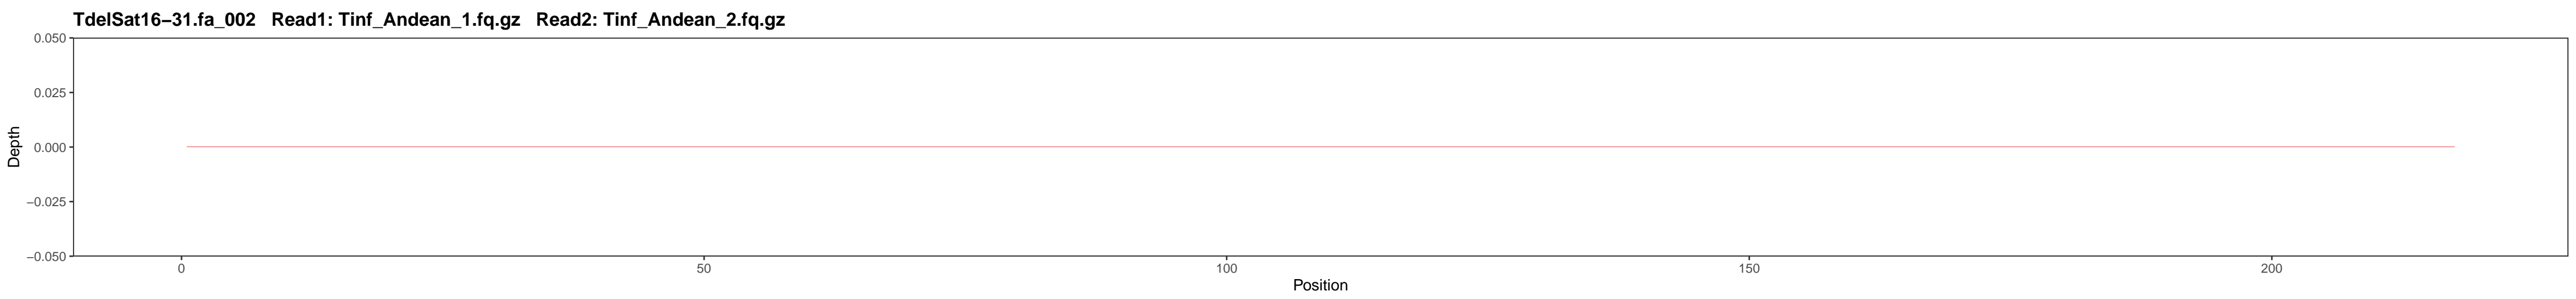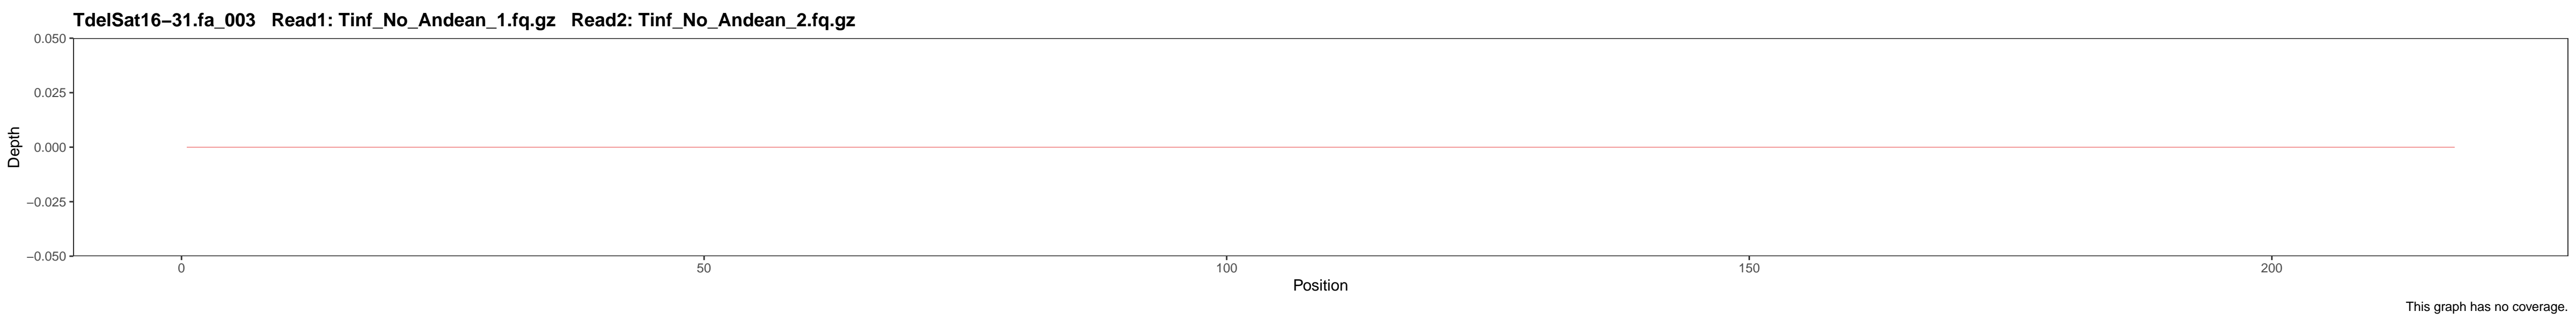

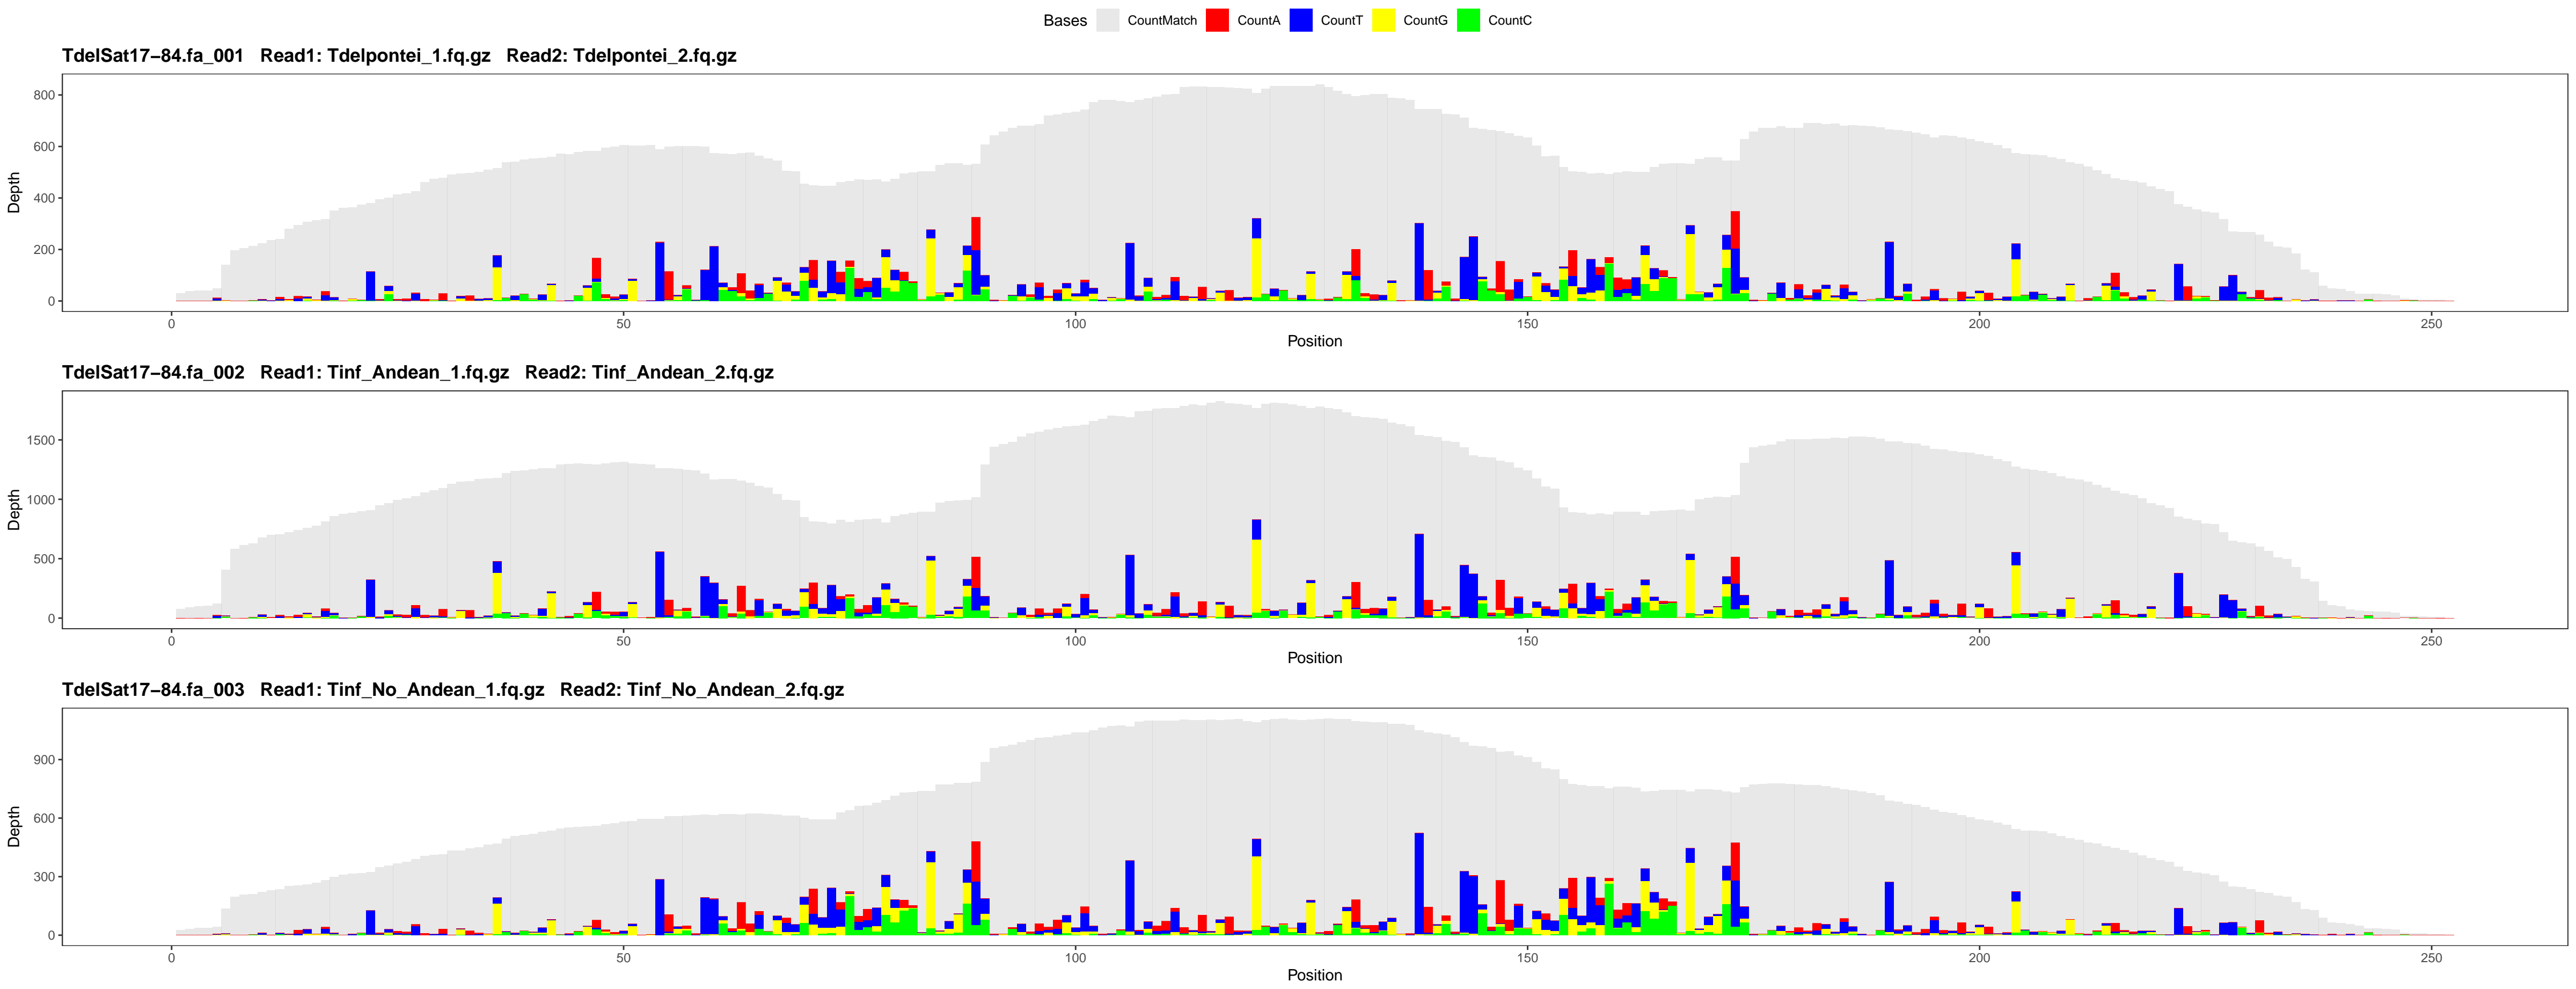

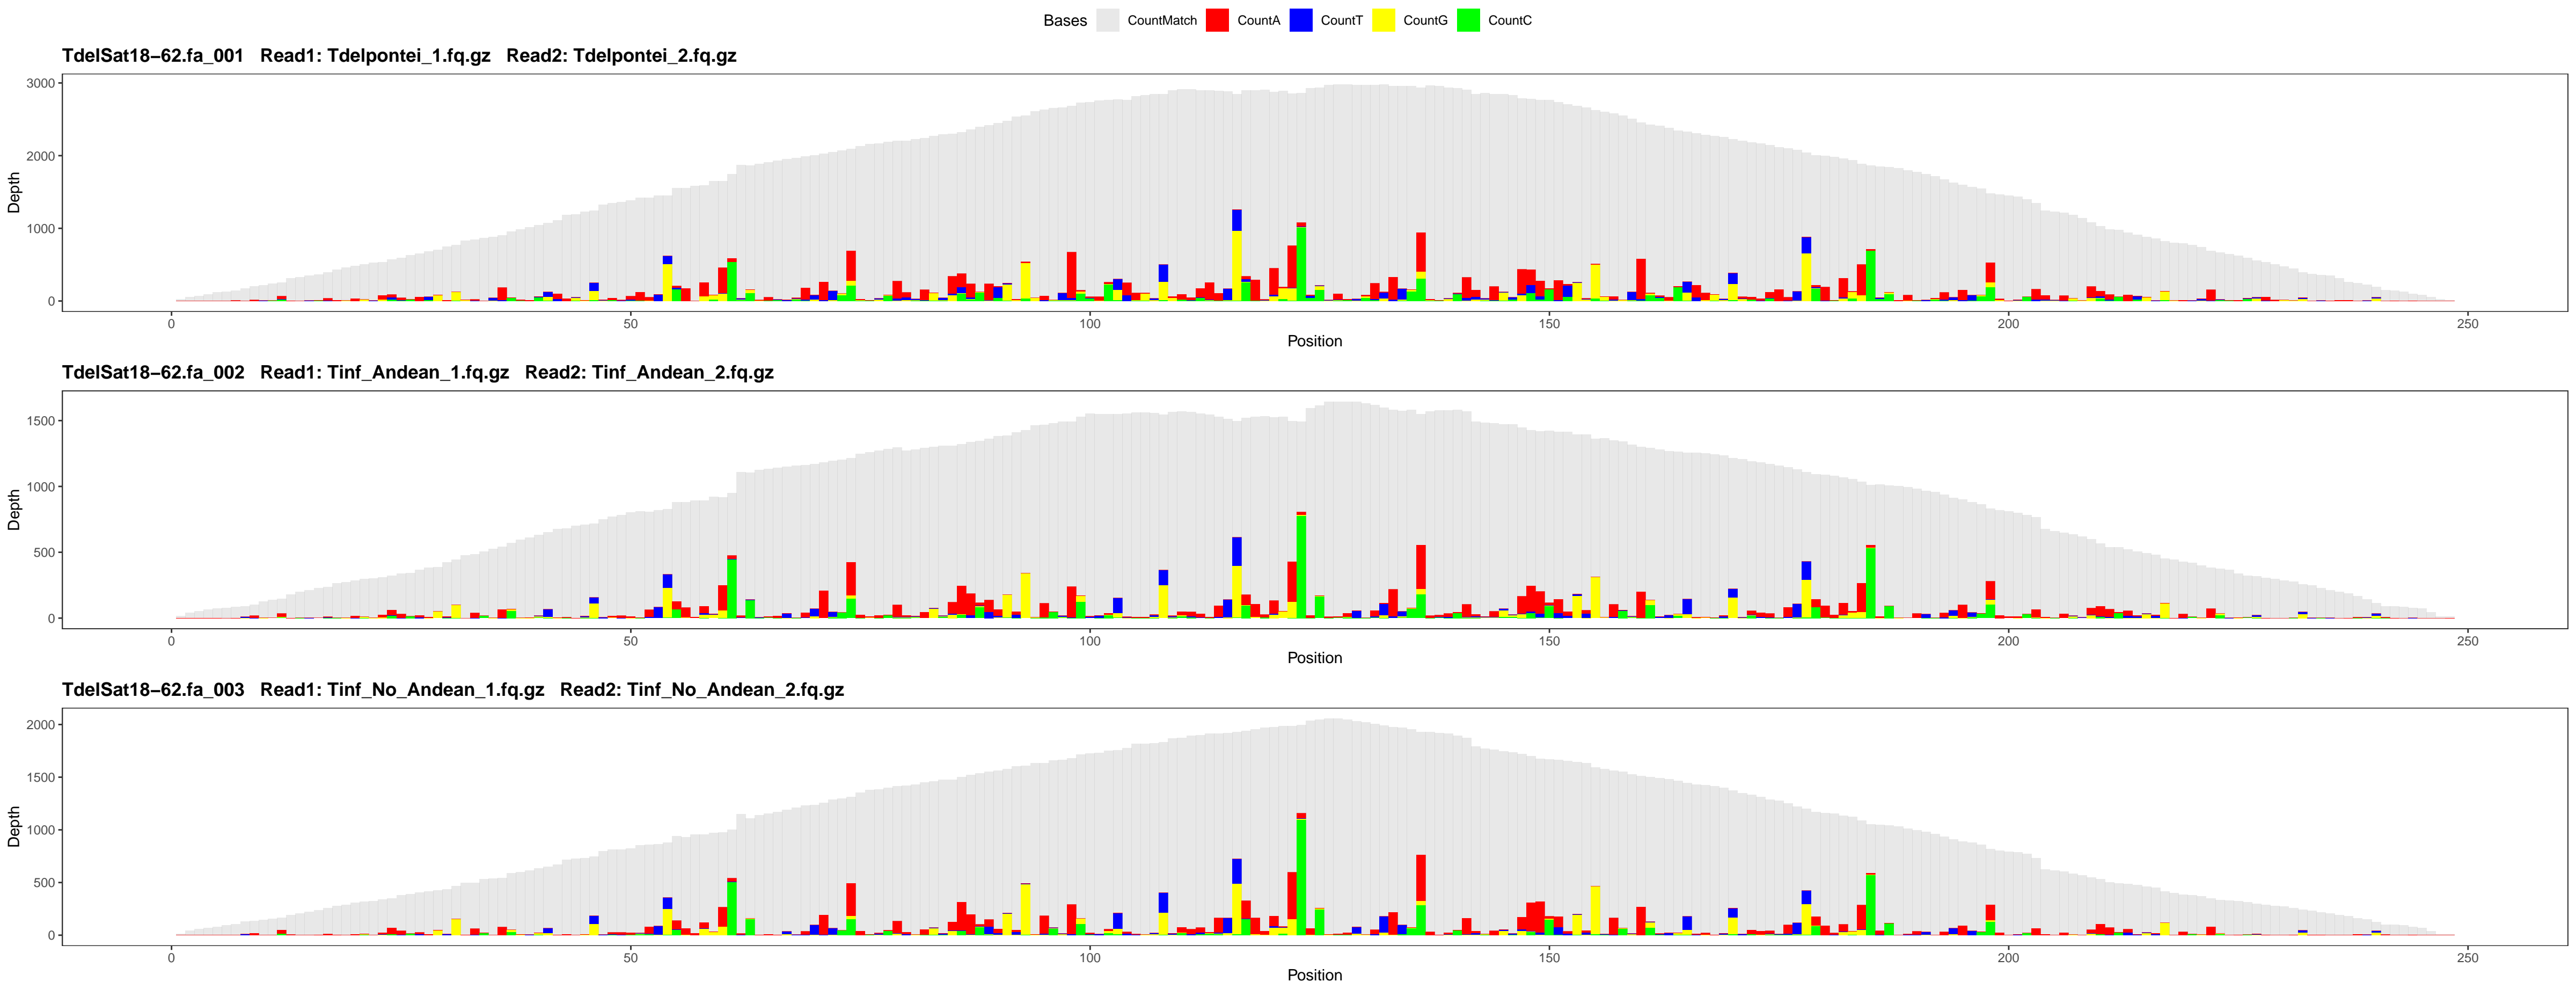

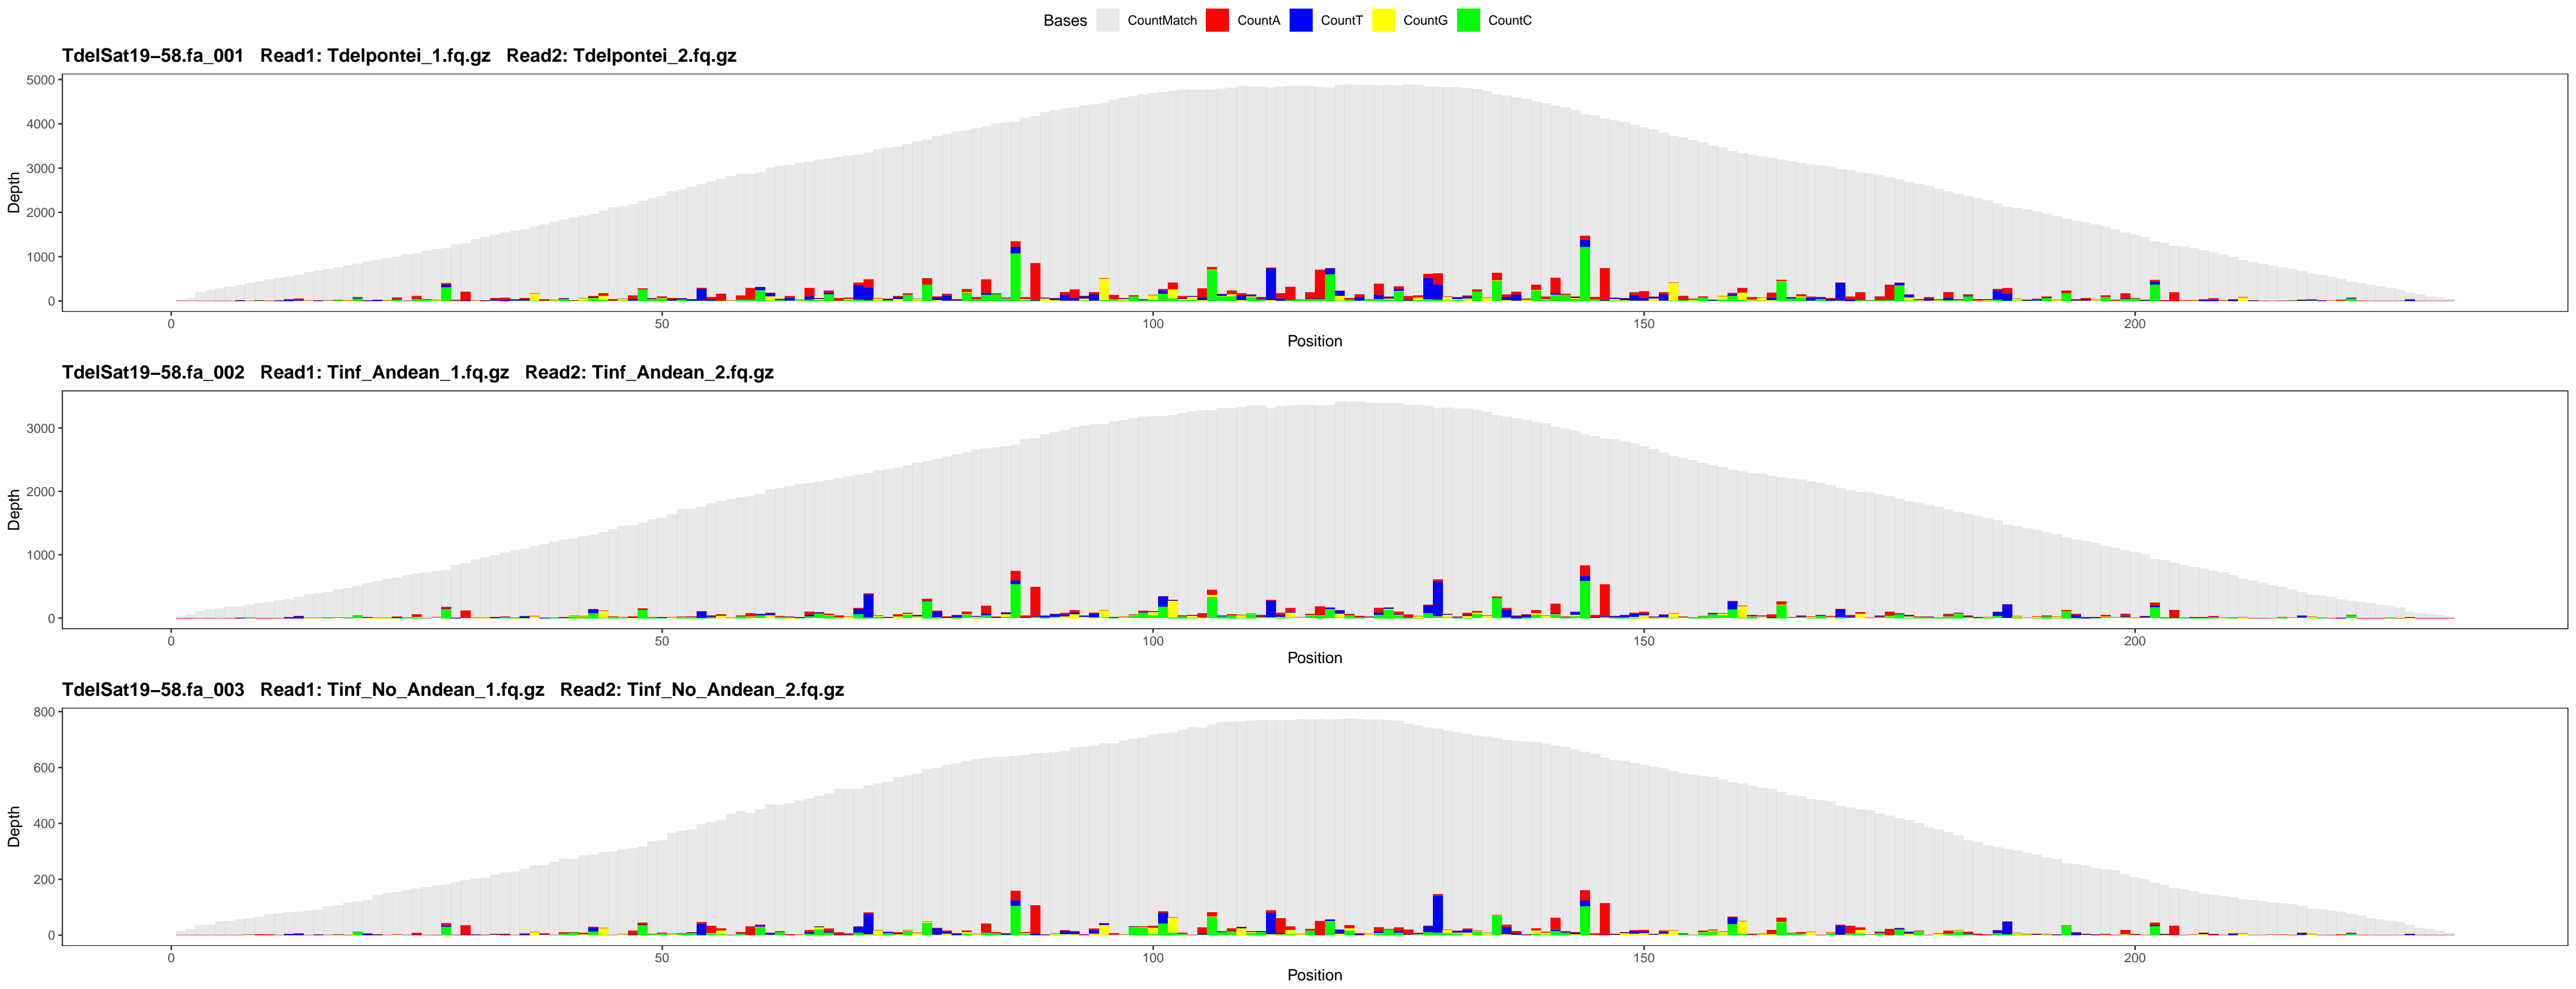

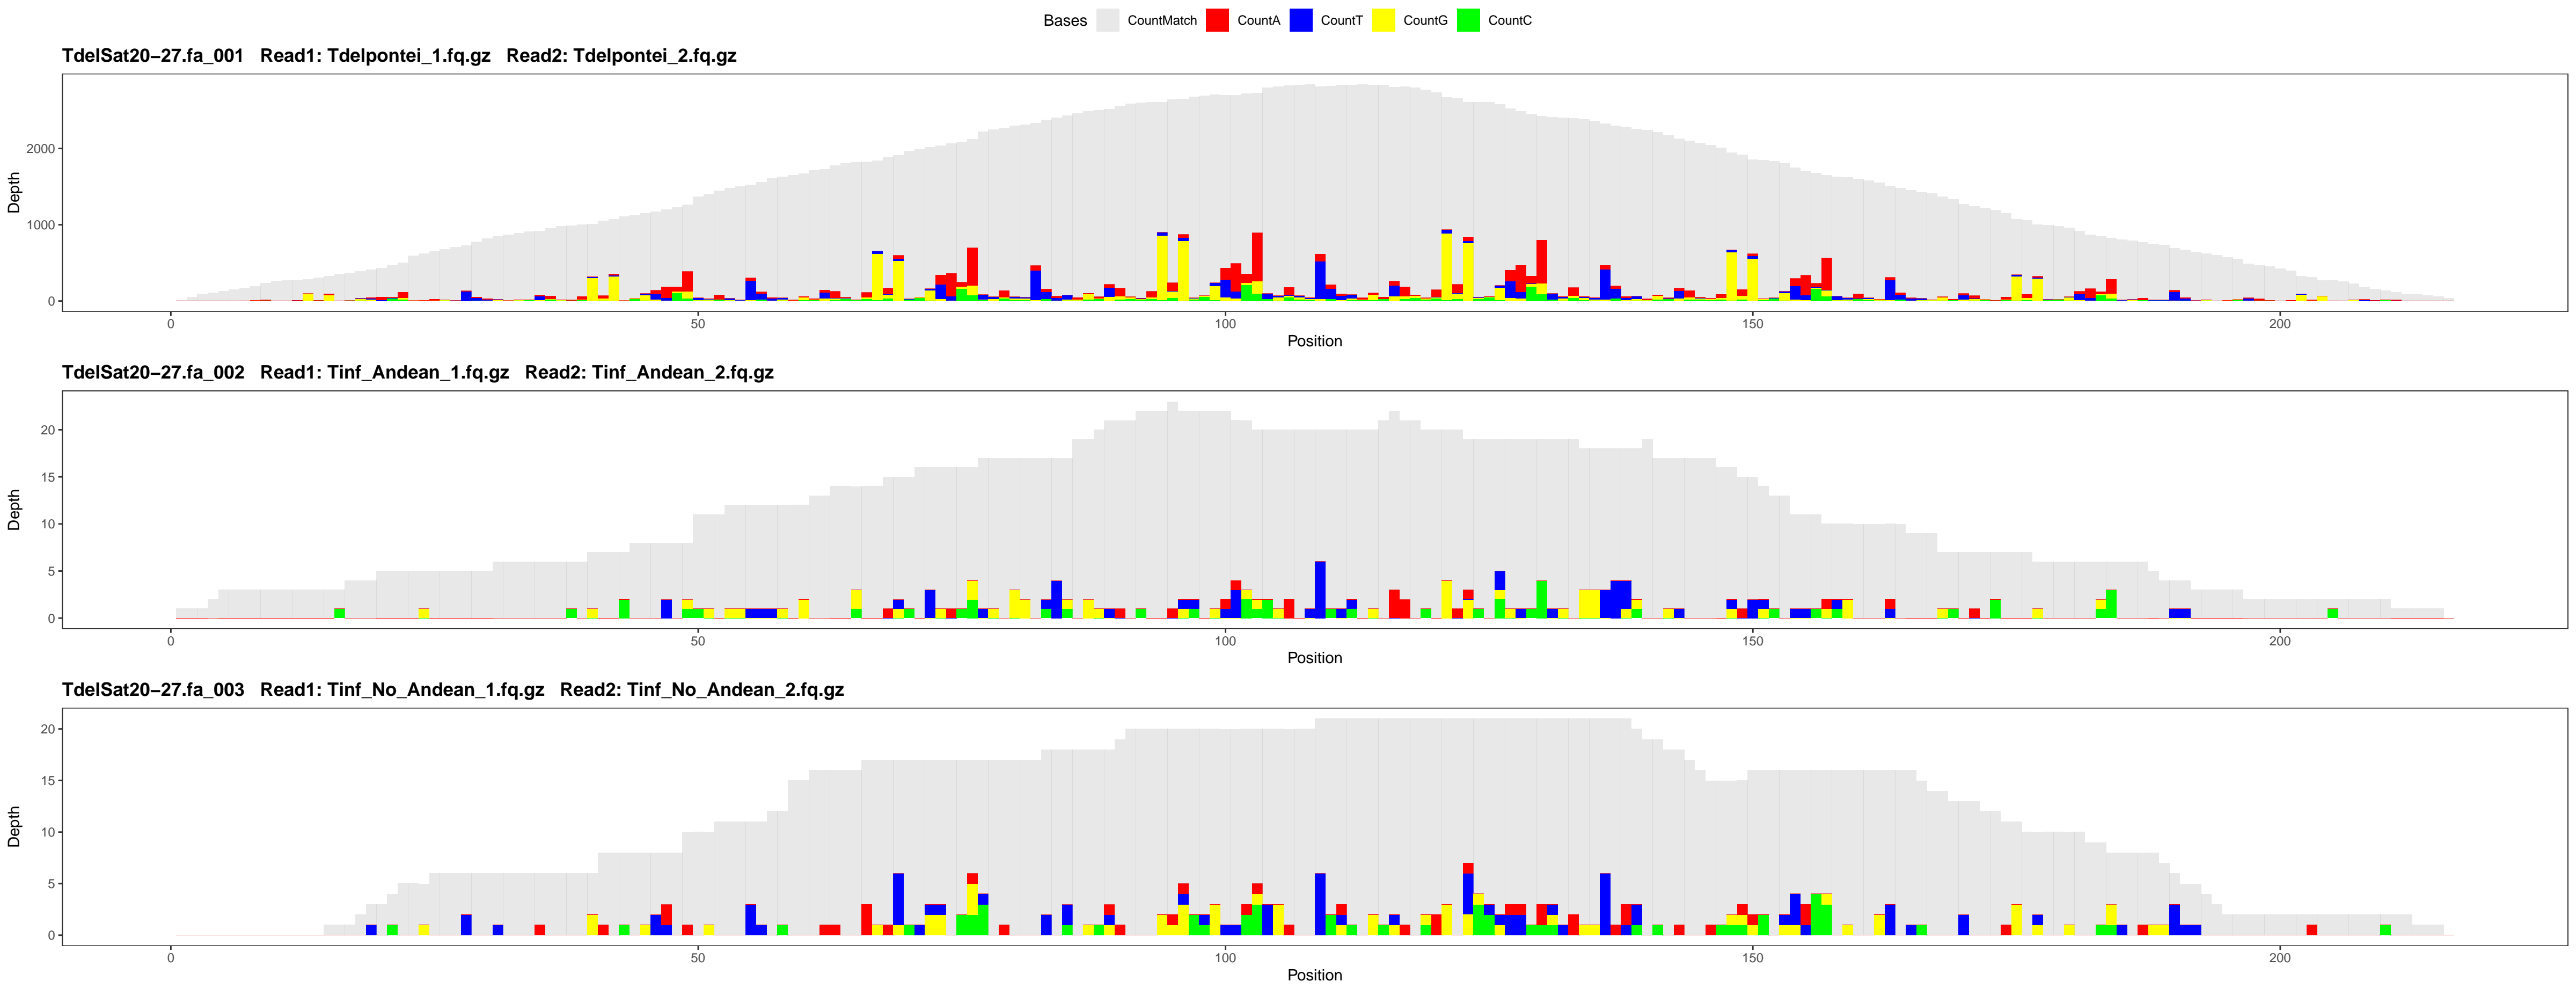

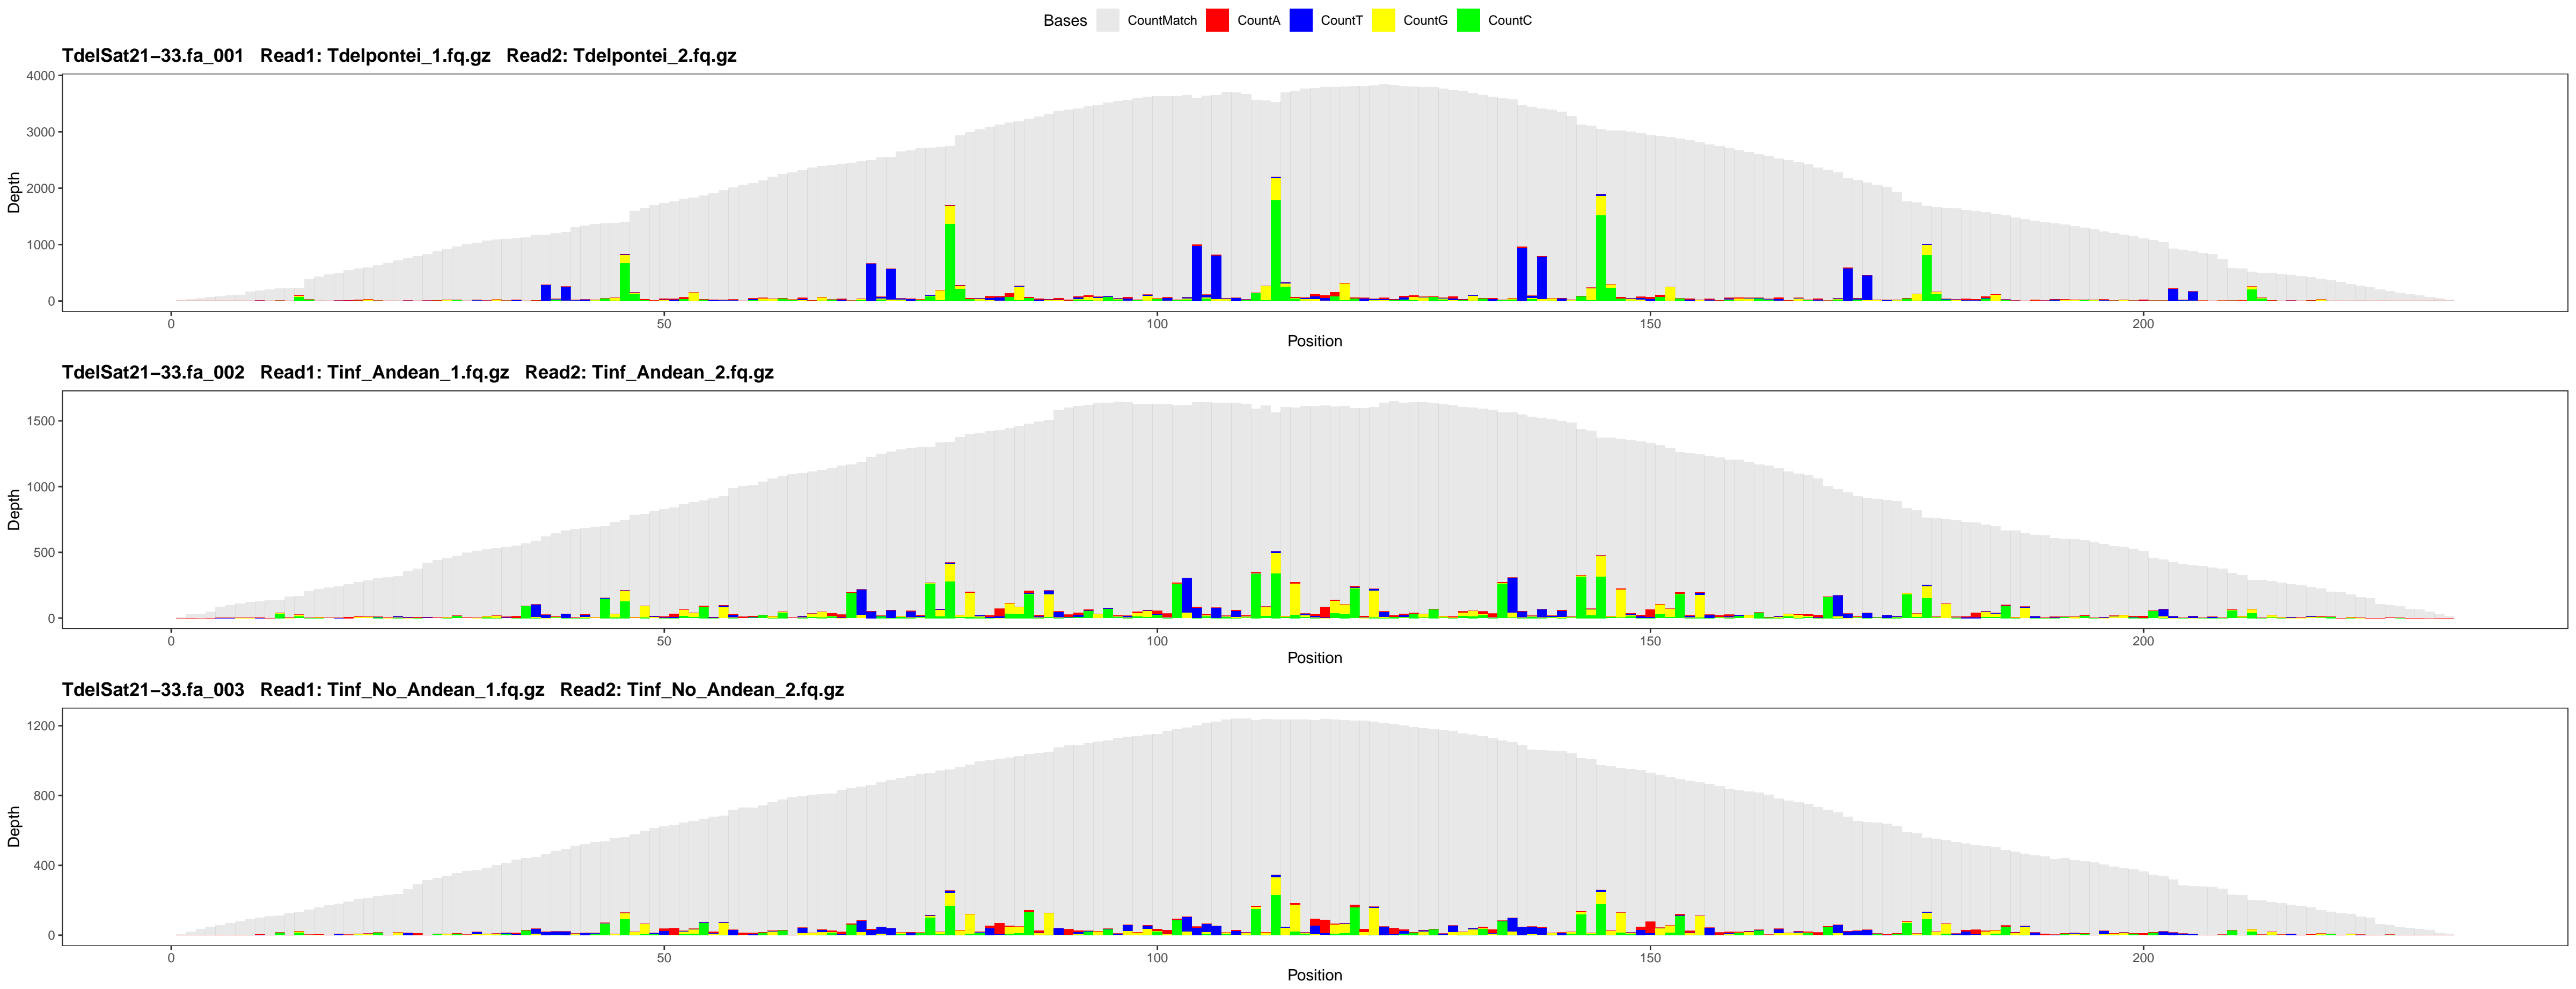

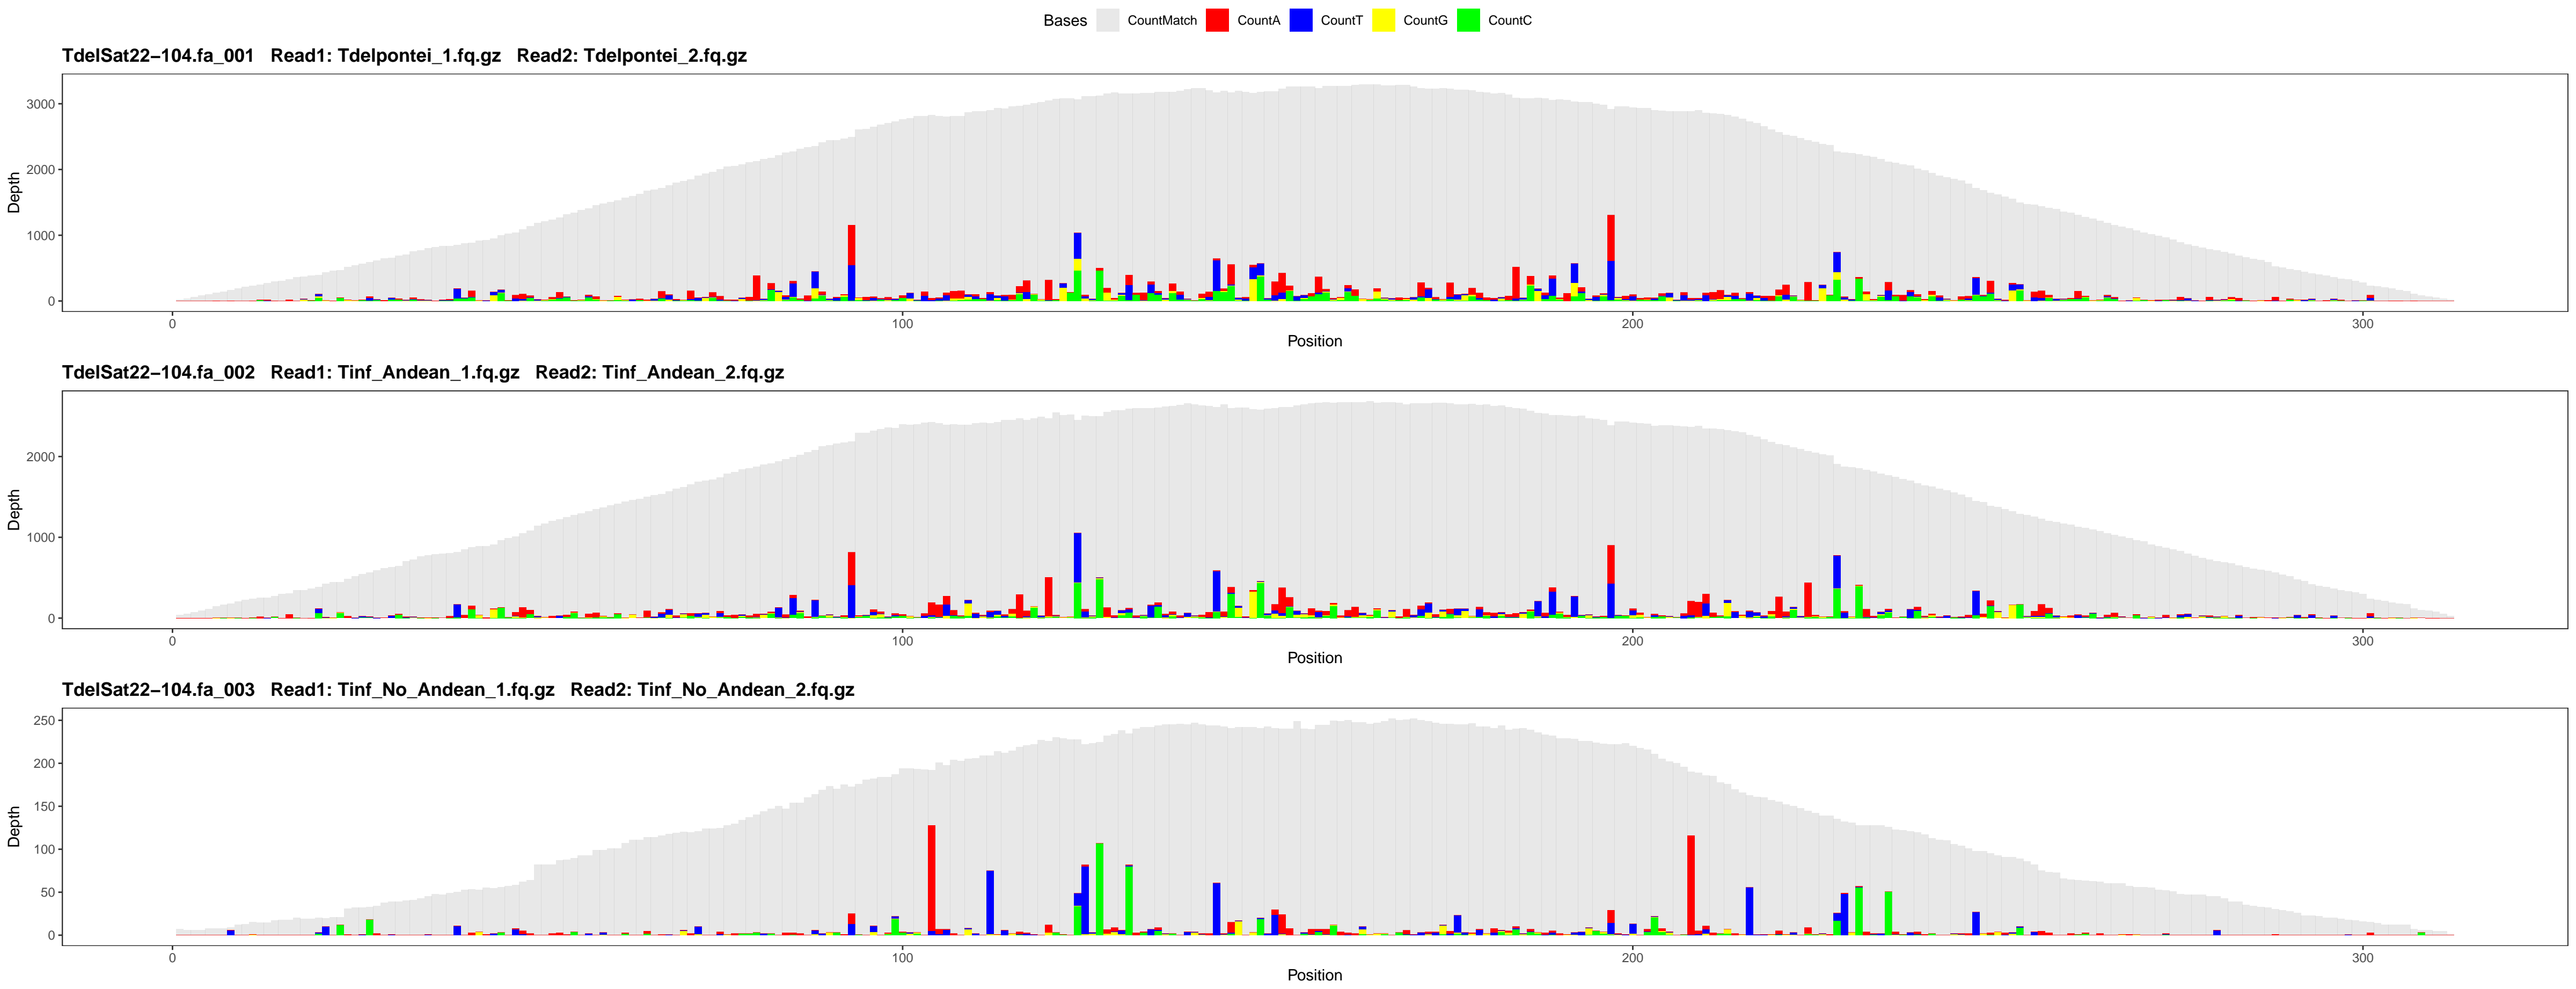



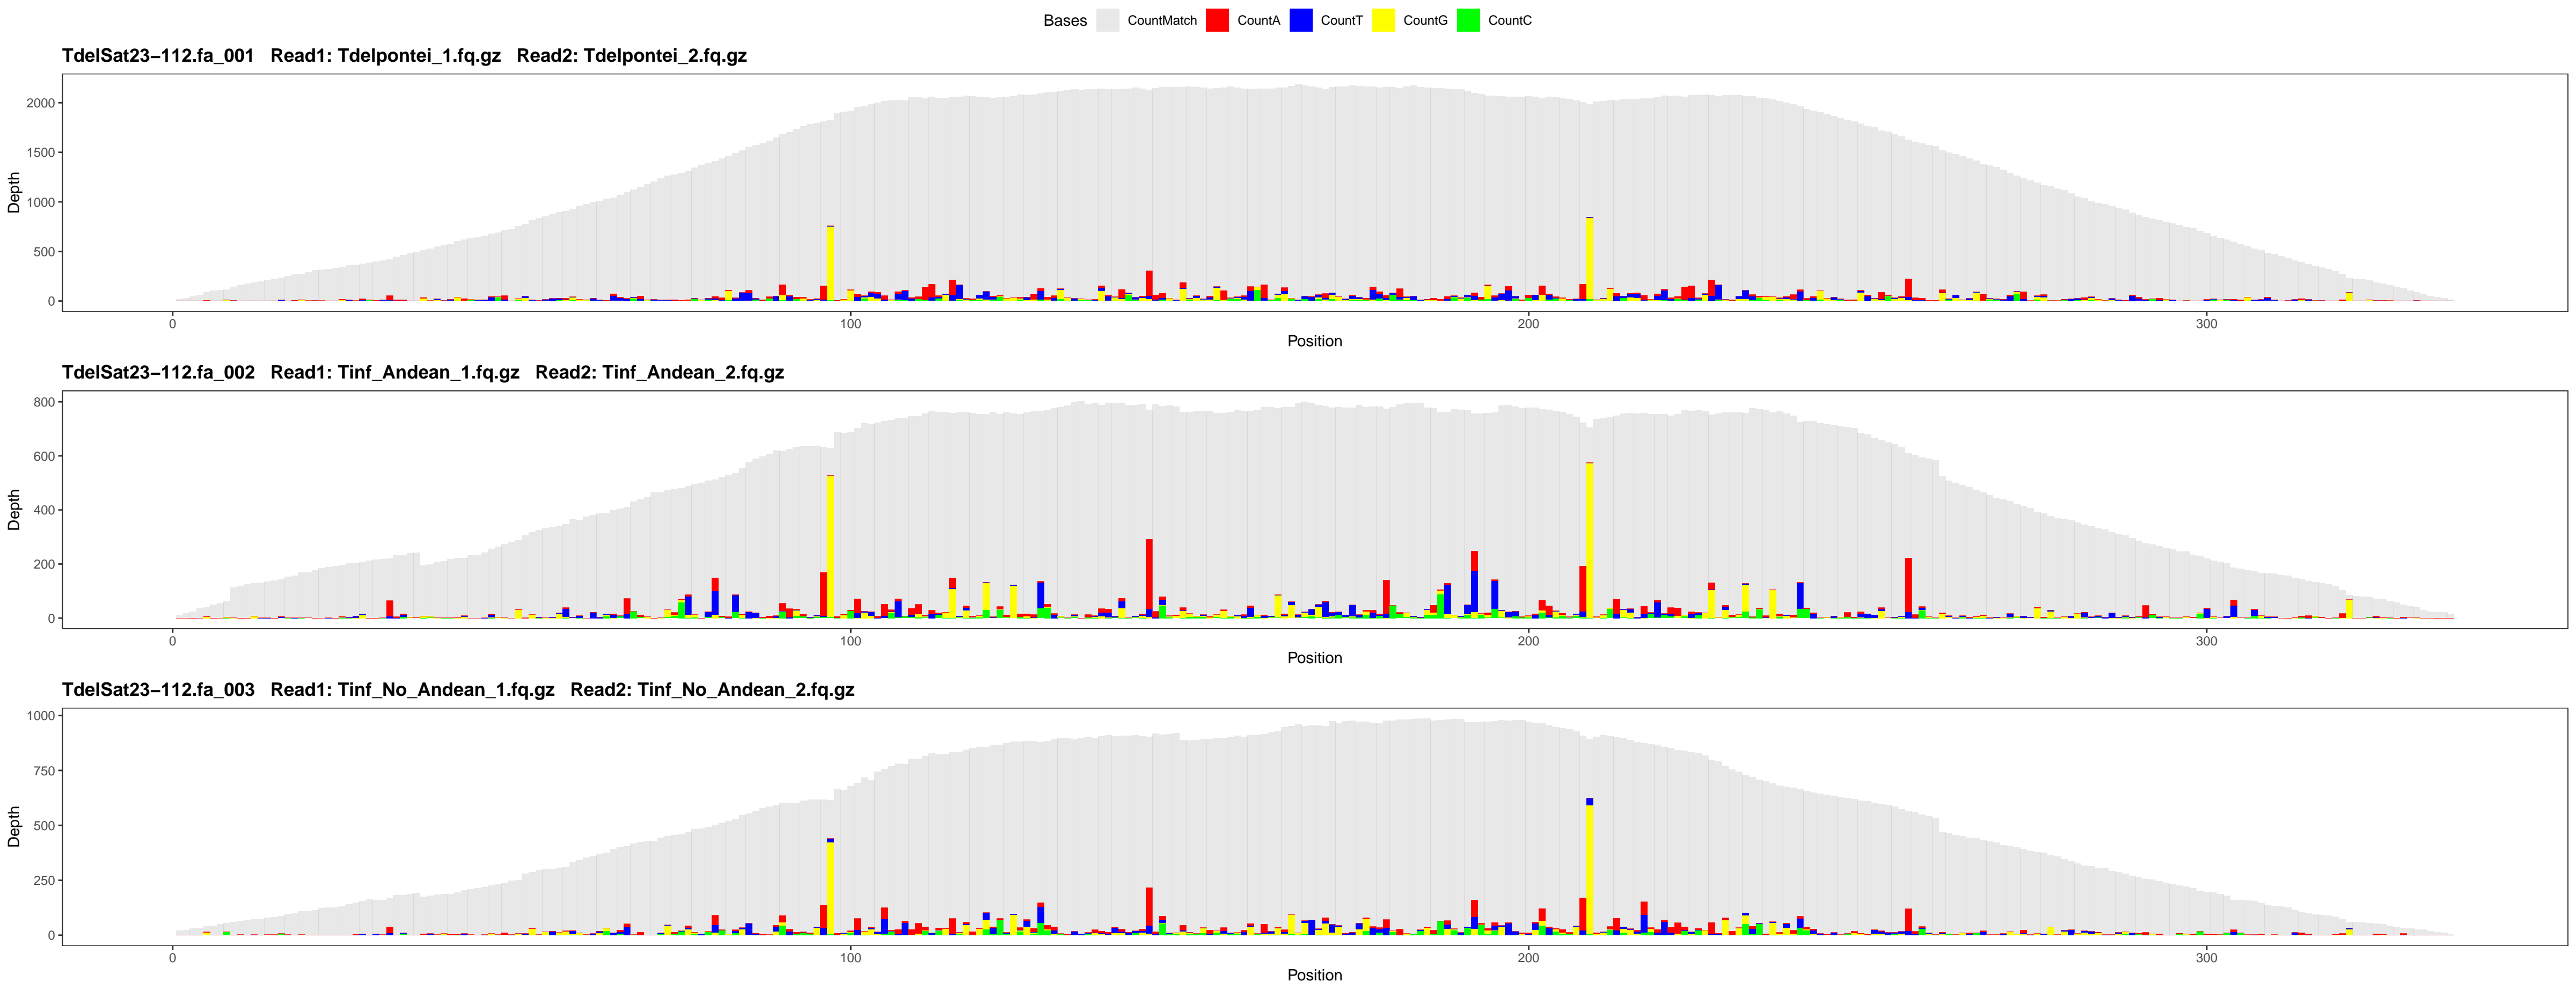

Bases CountMatch CountA CountT CountG CountC

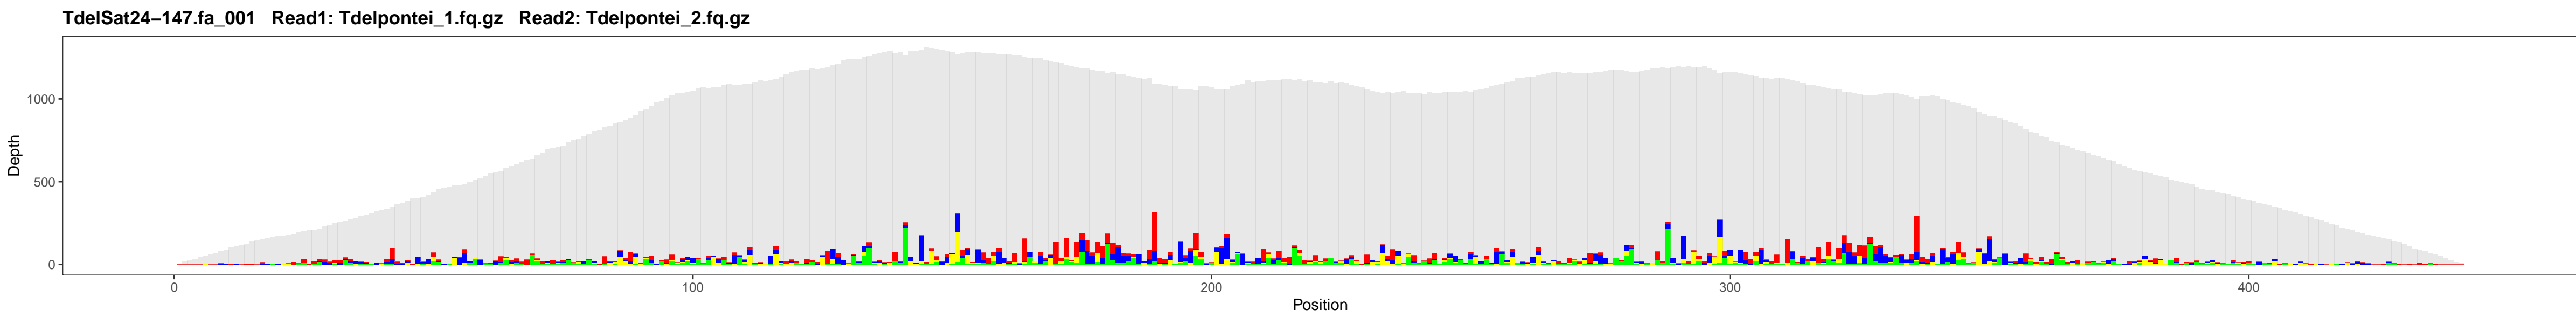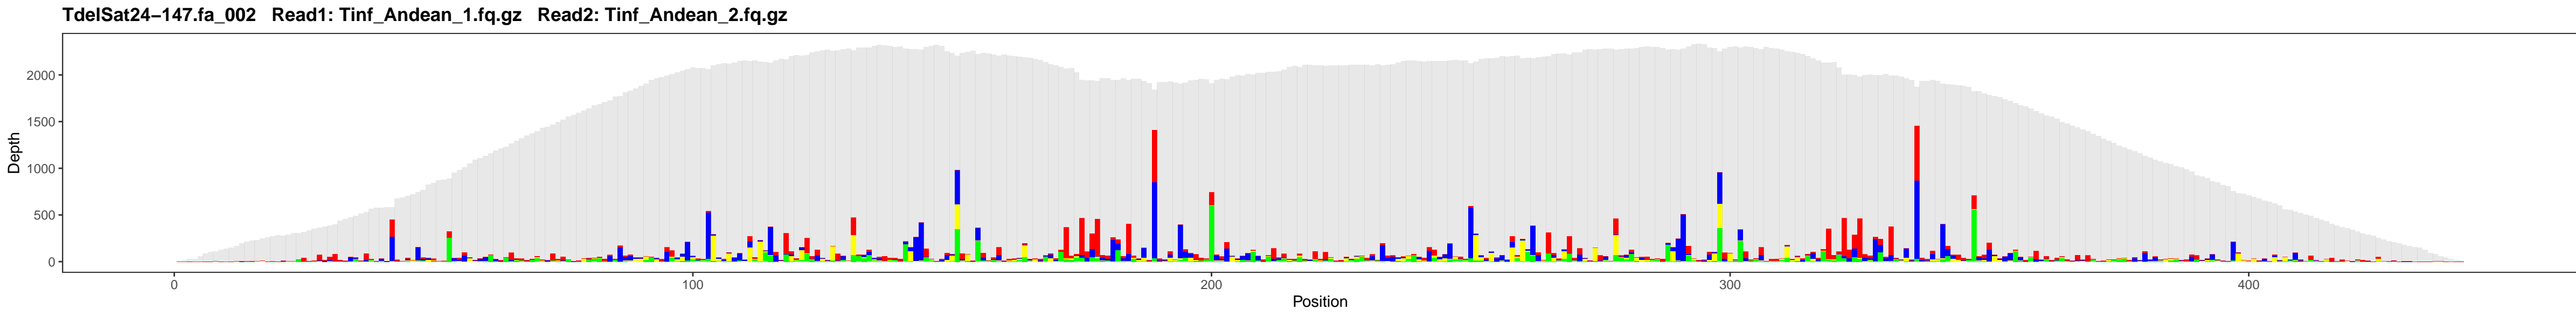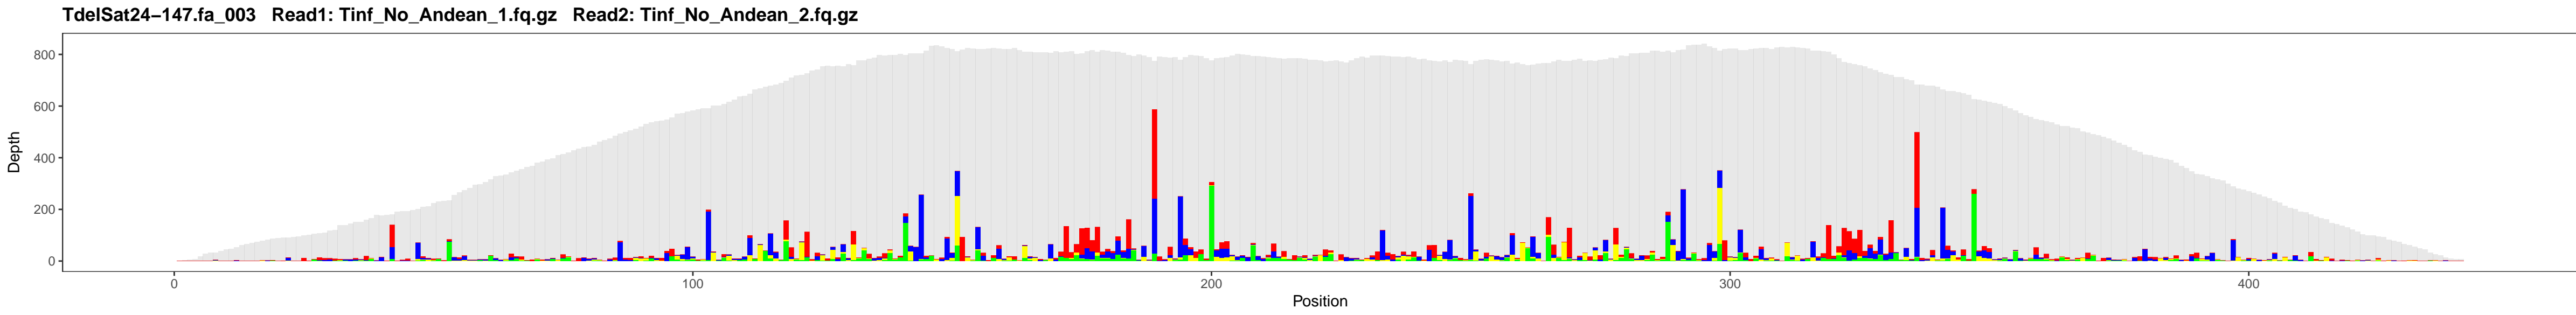

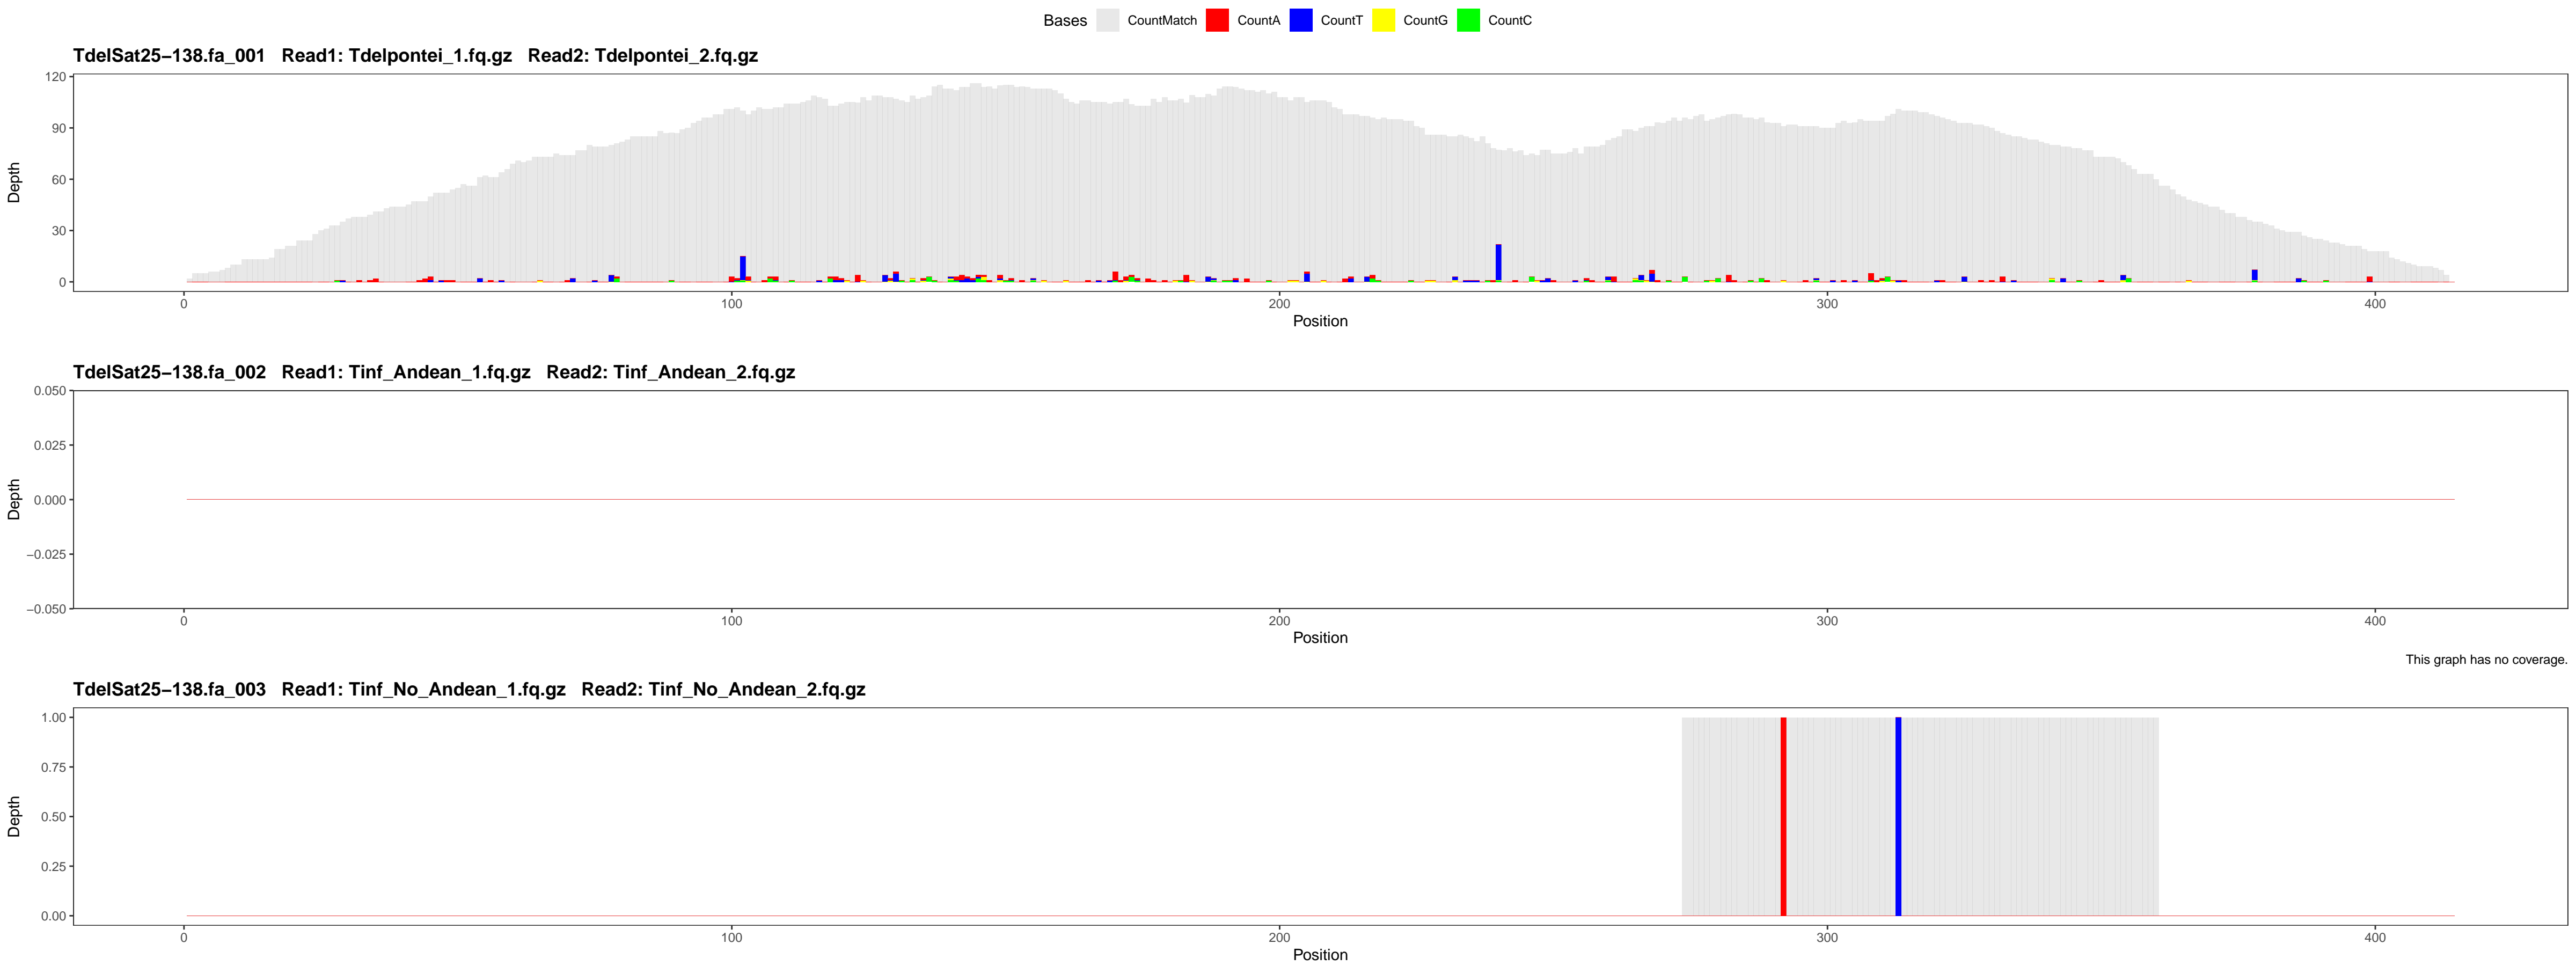

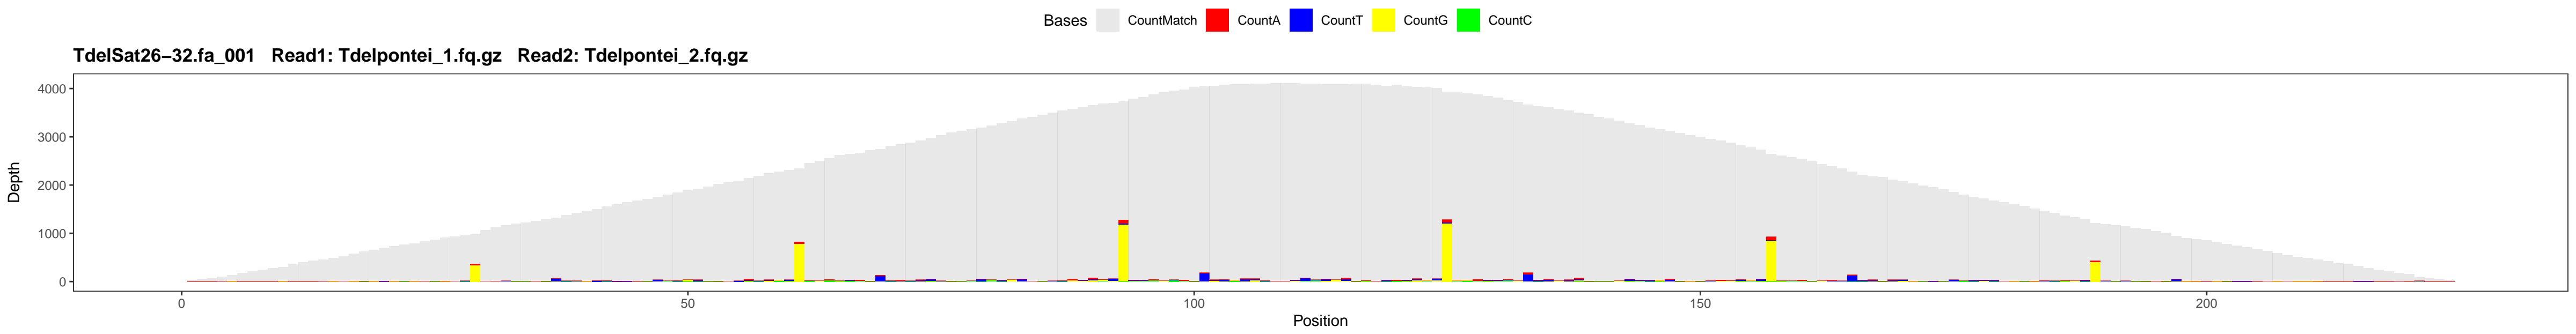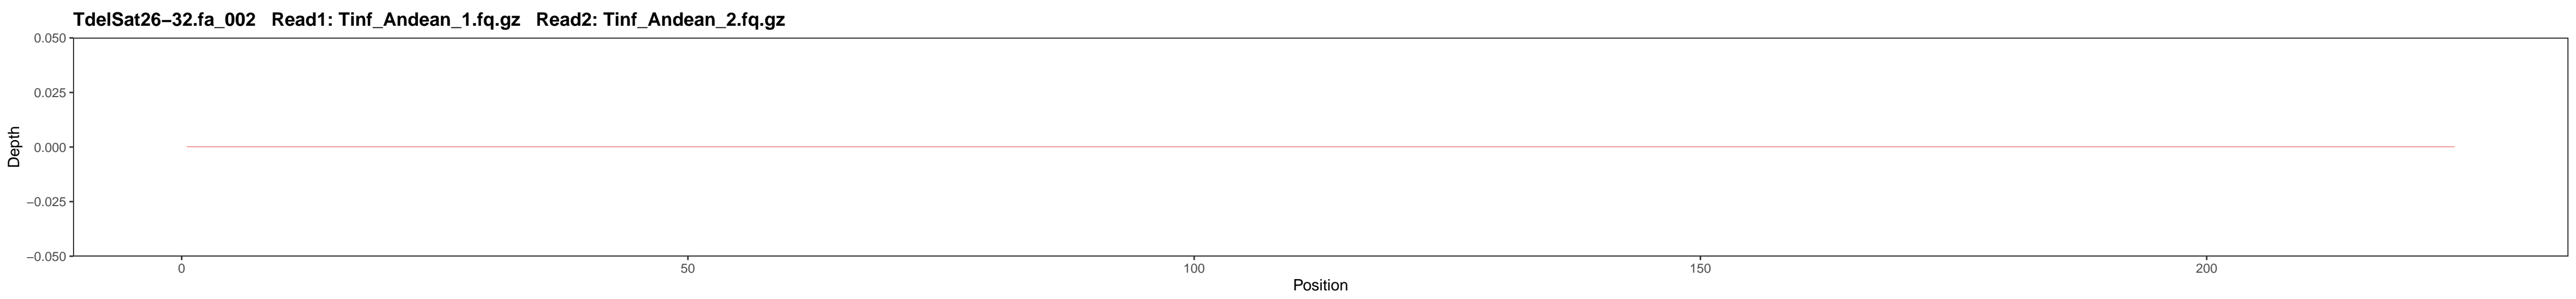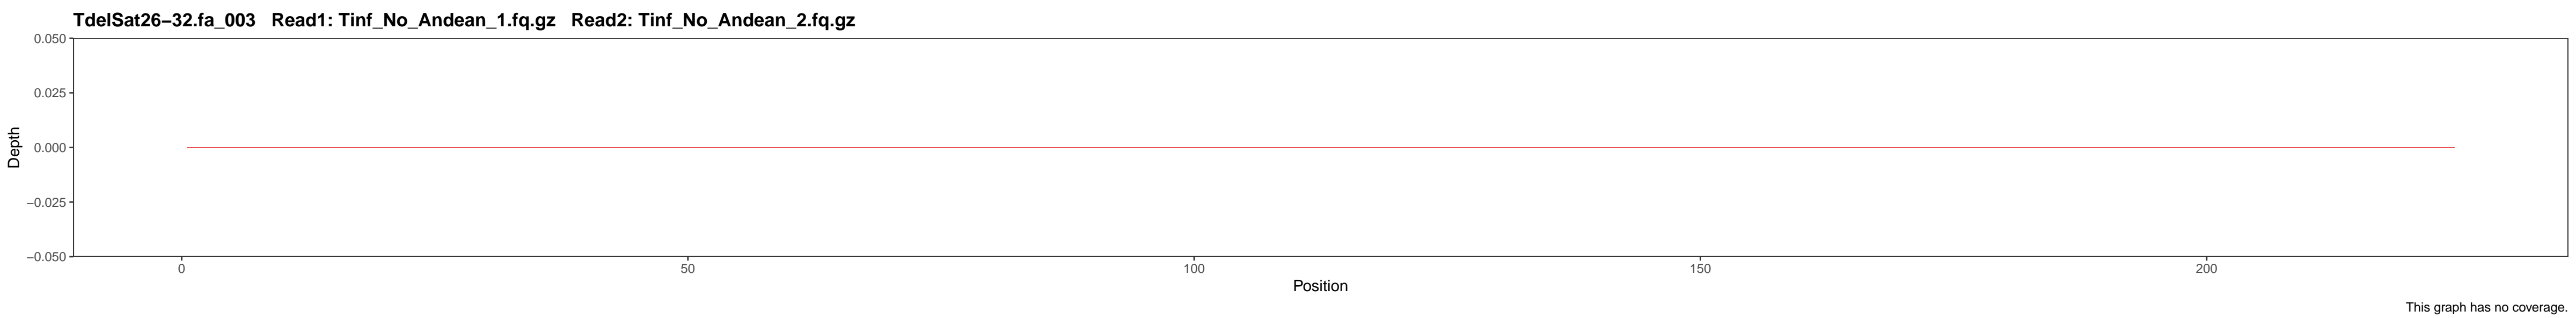

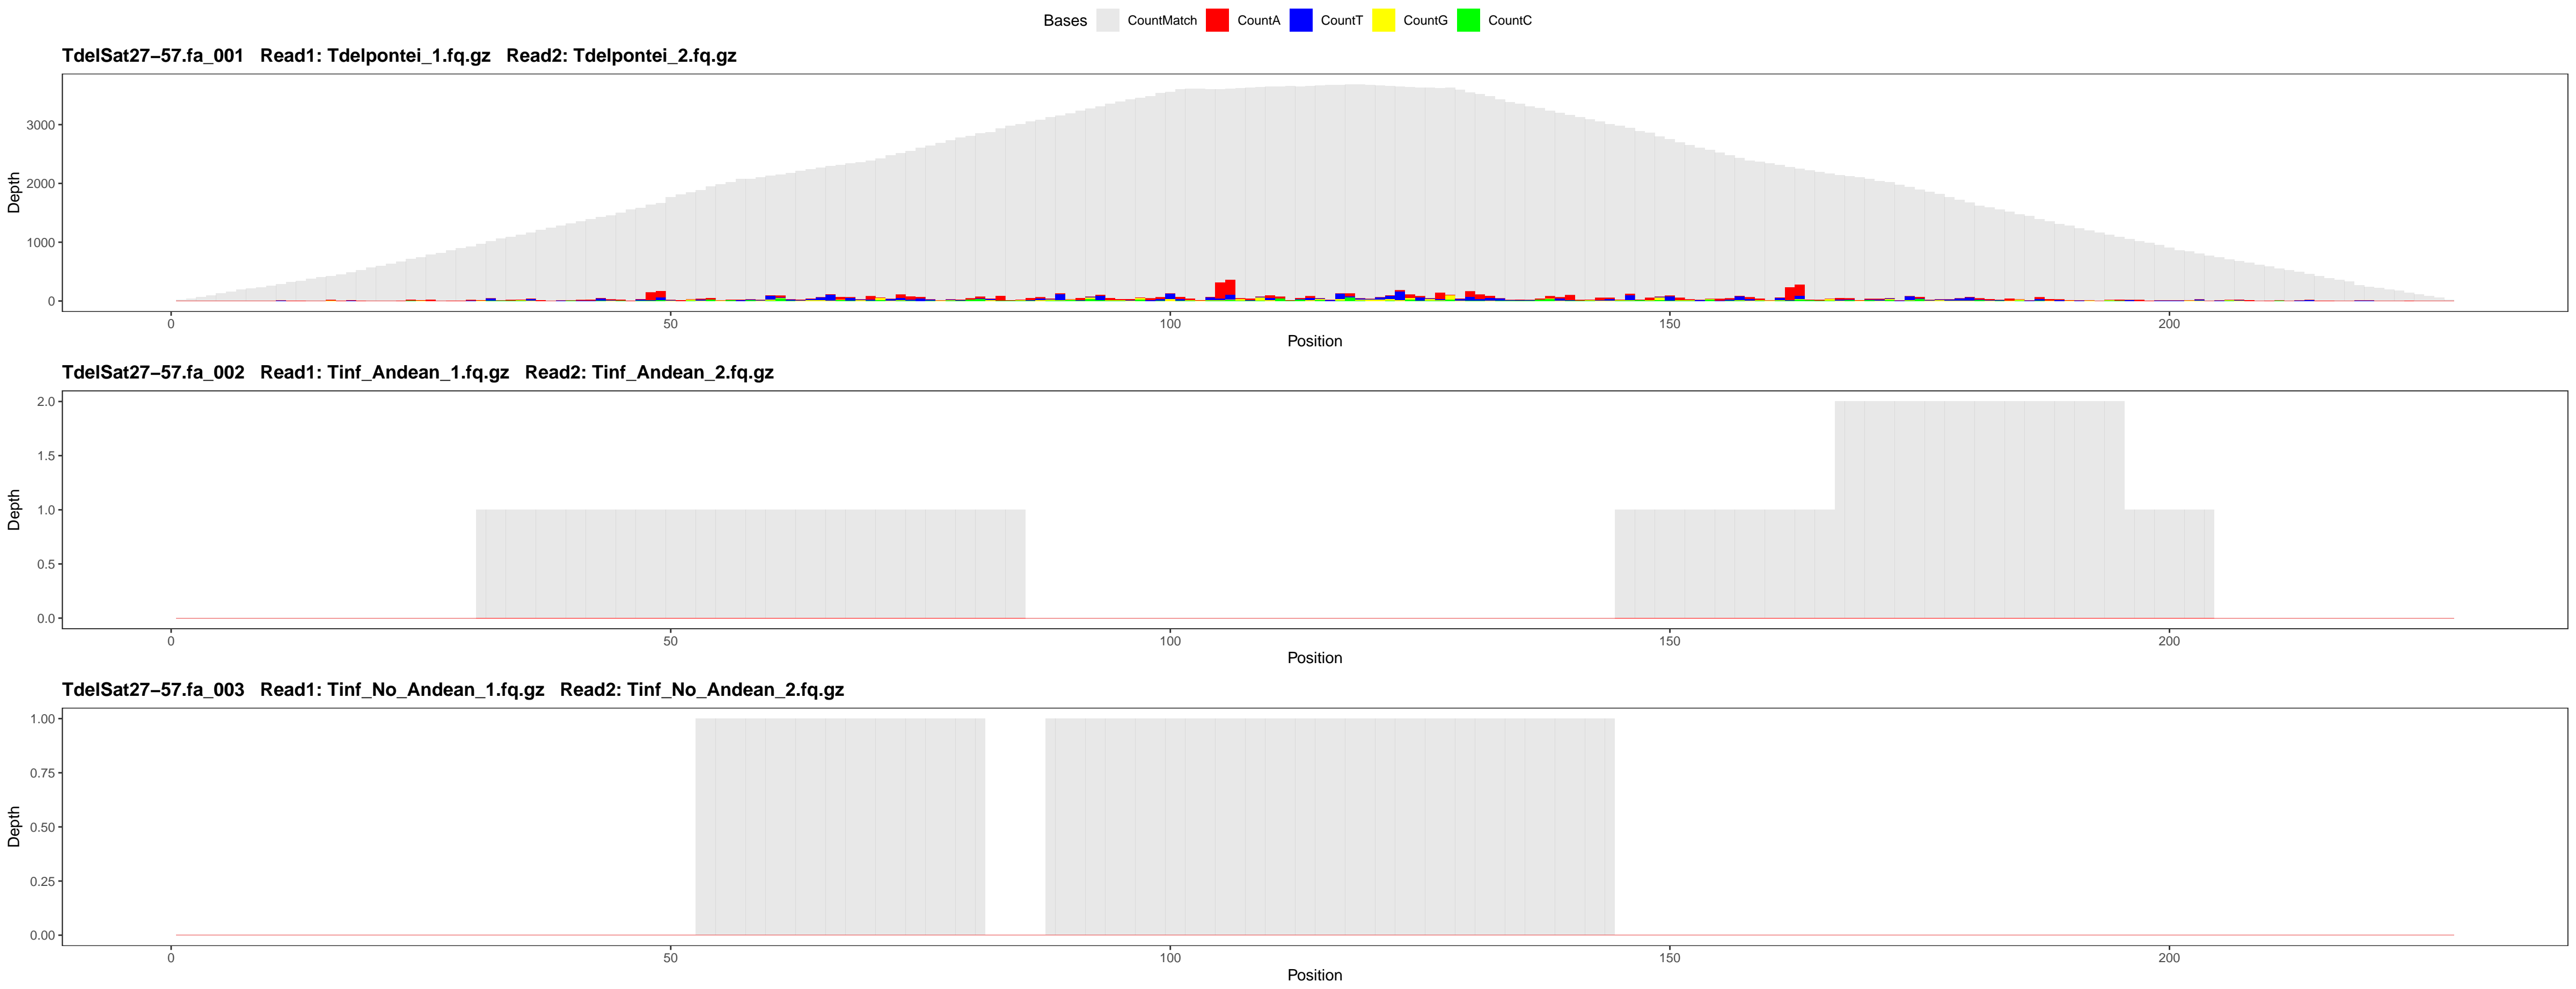

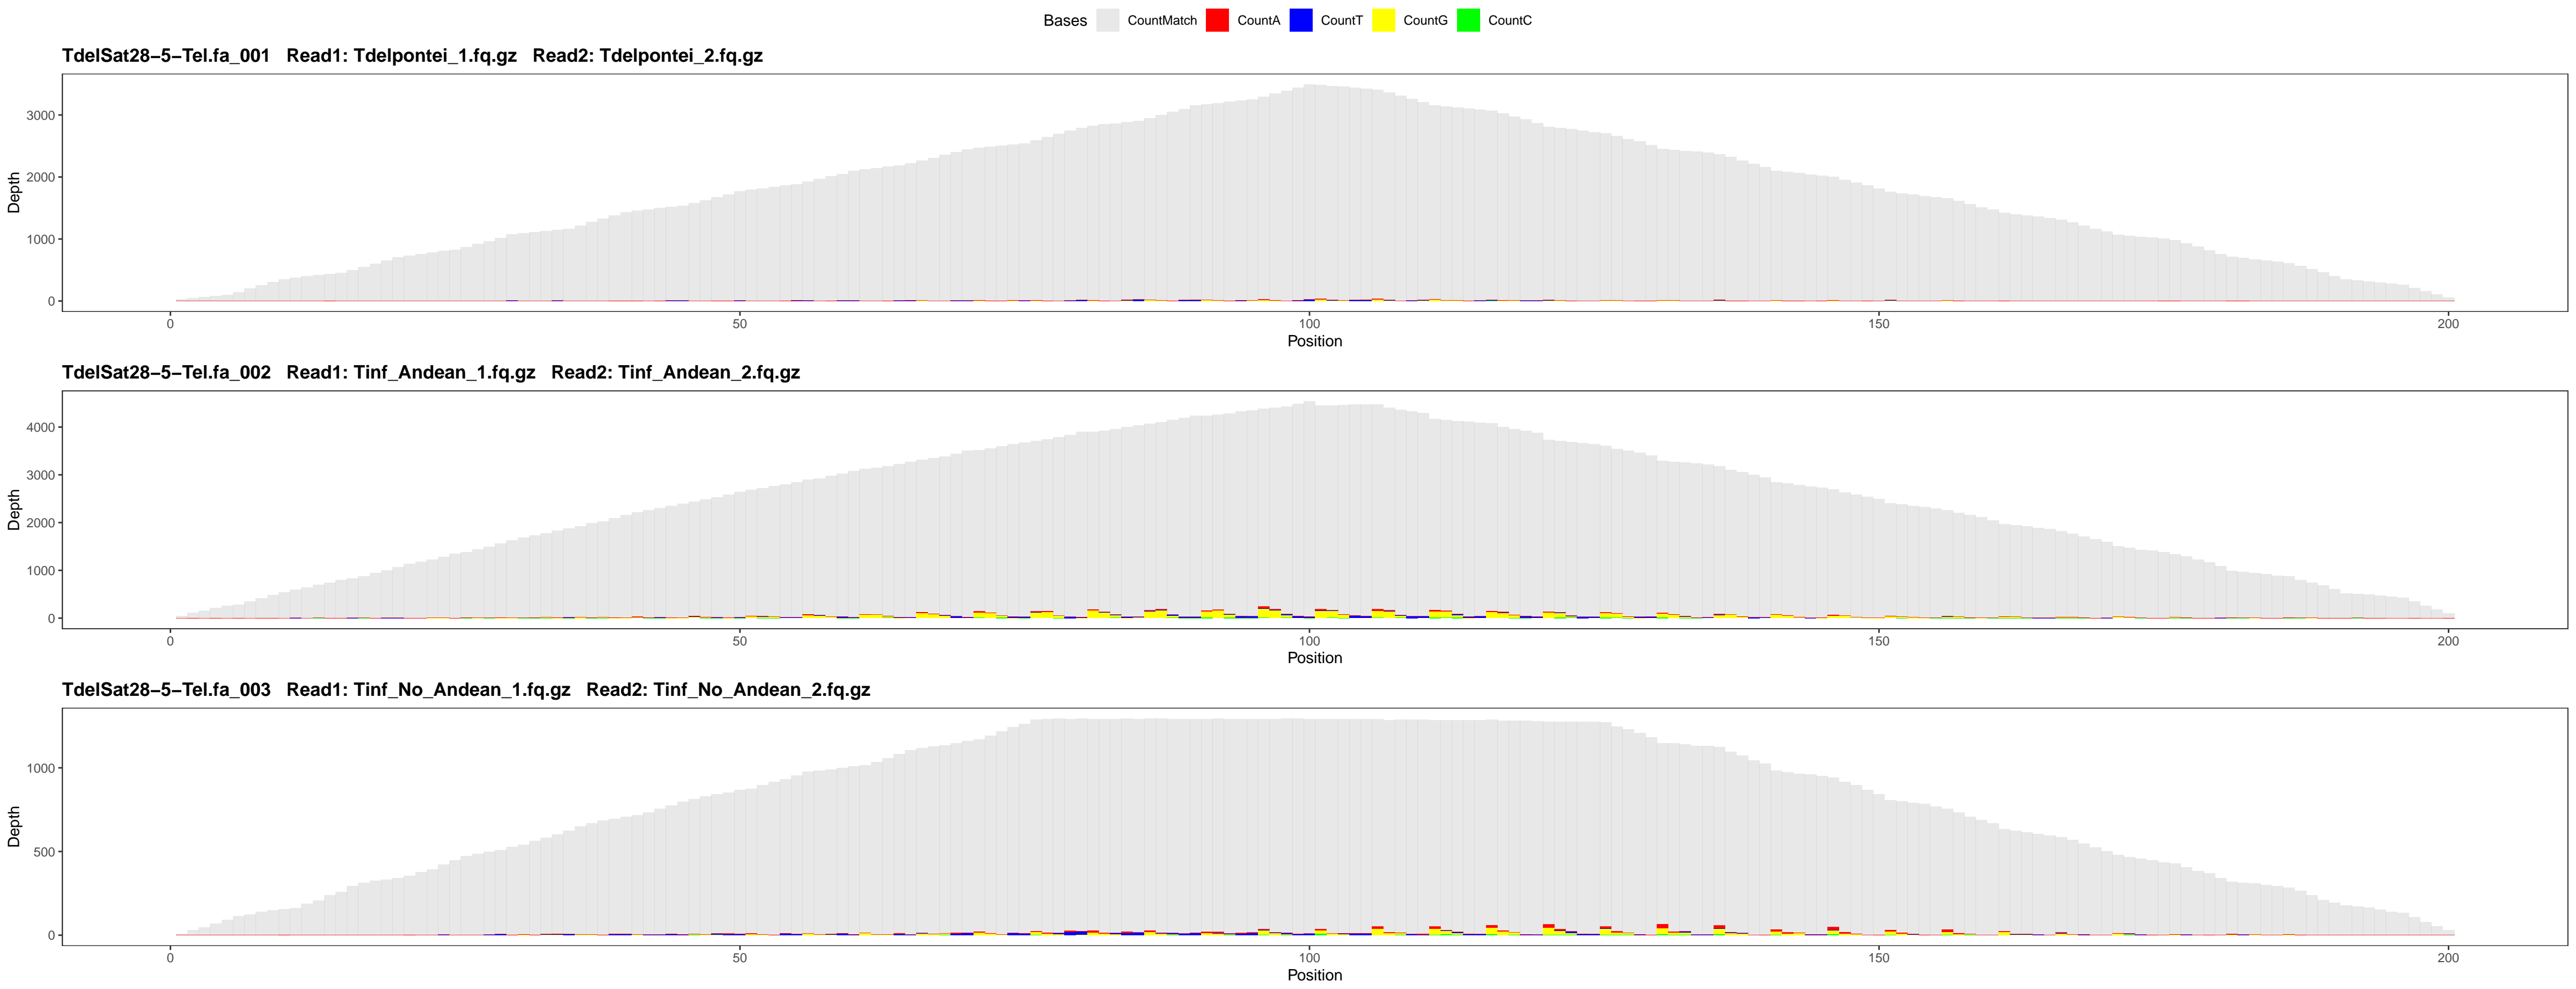

Bases CountMatch CountA CountT CountG CountC

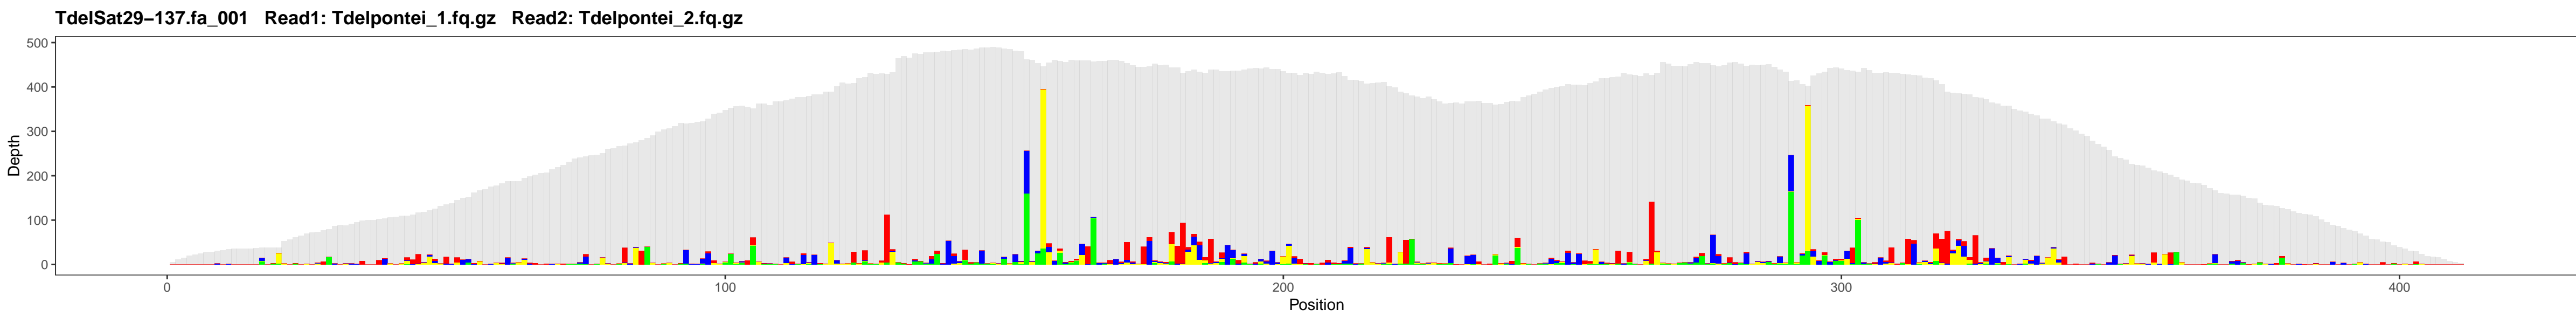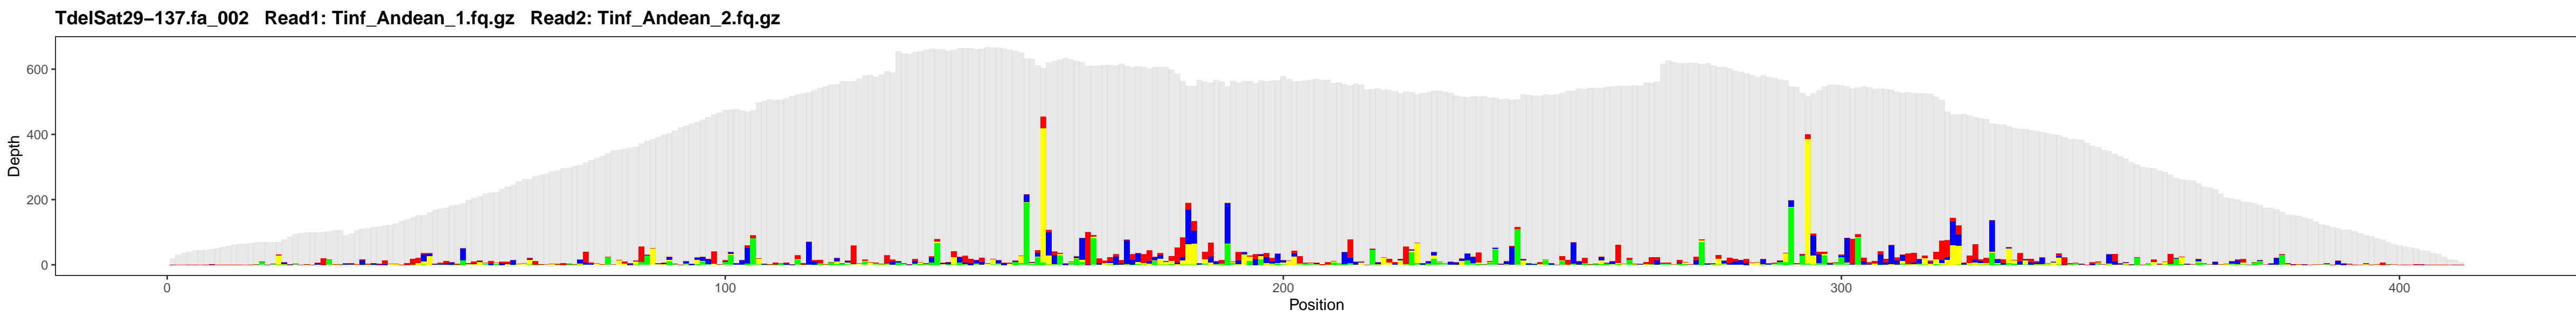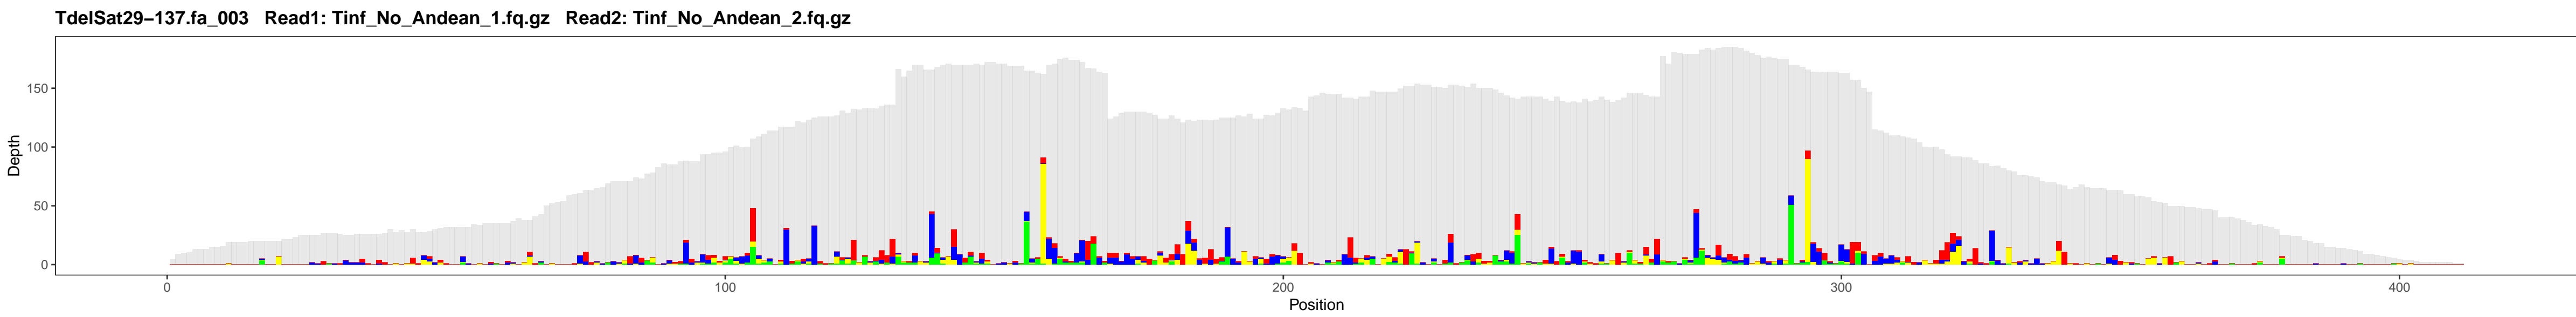

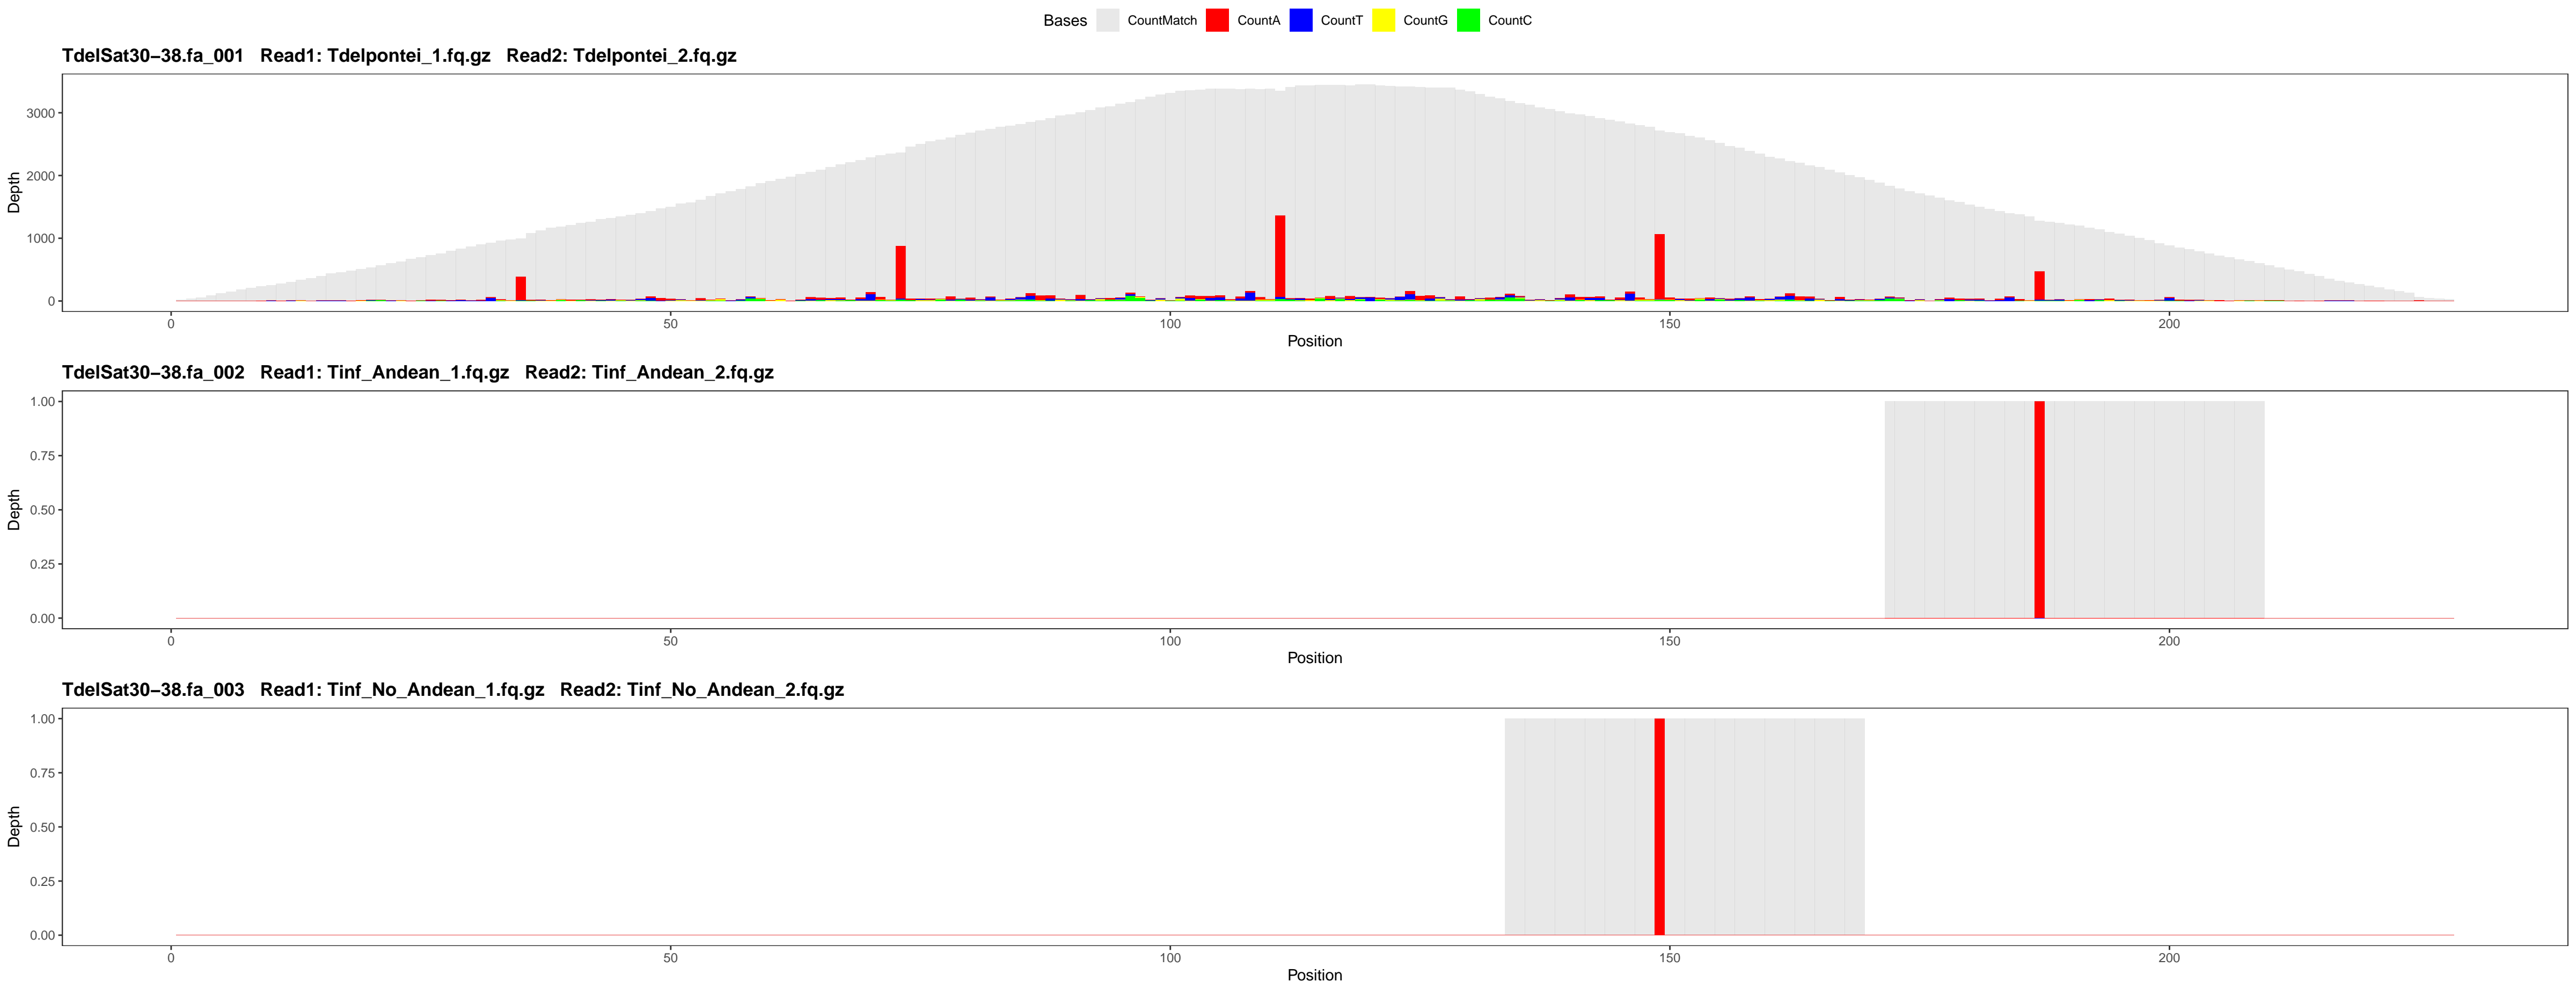



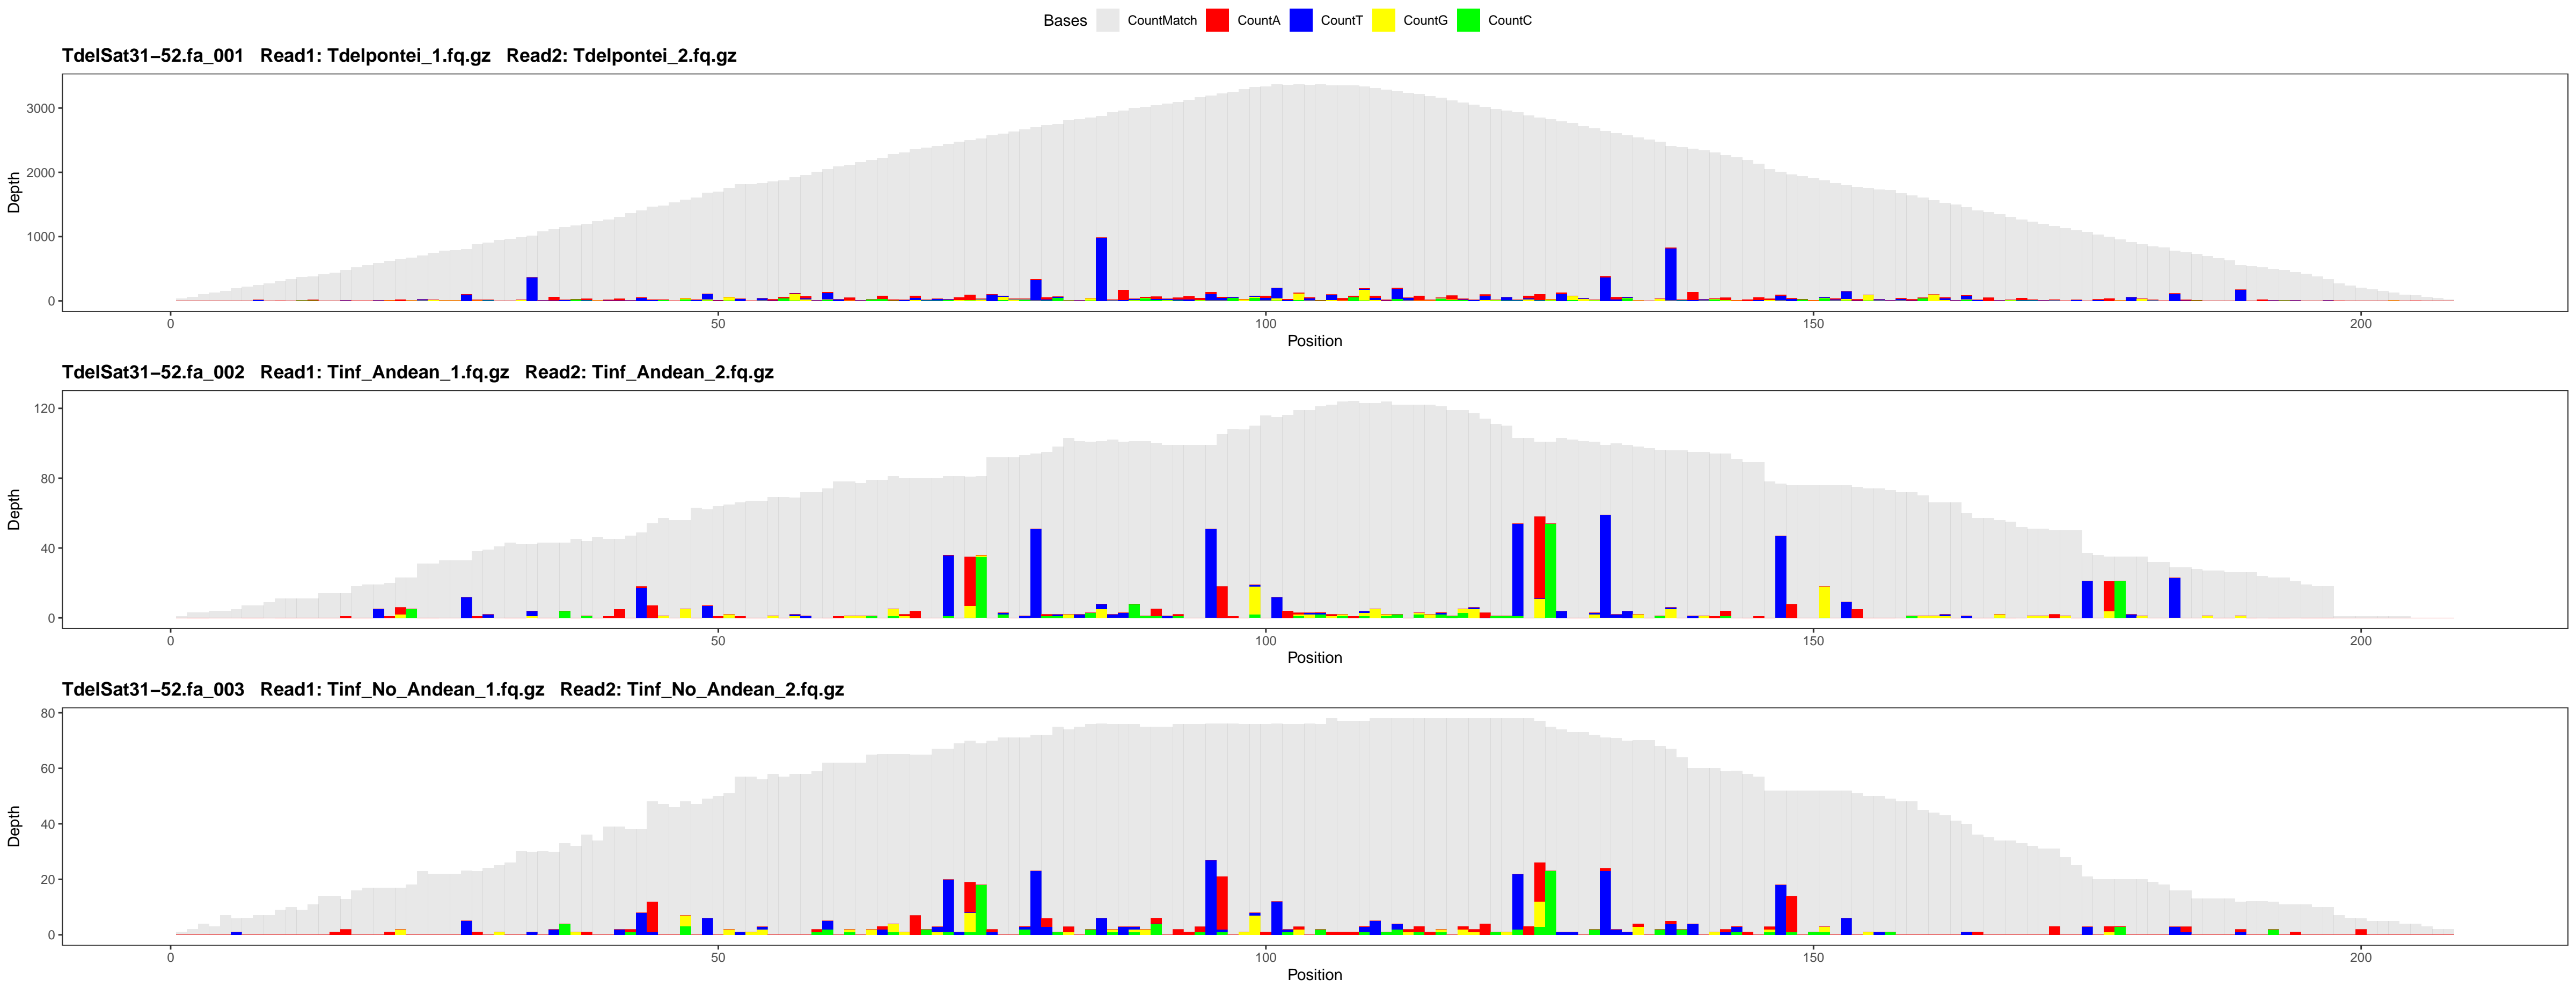

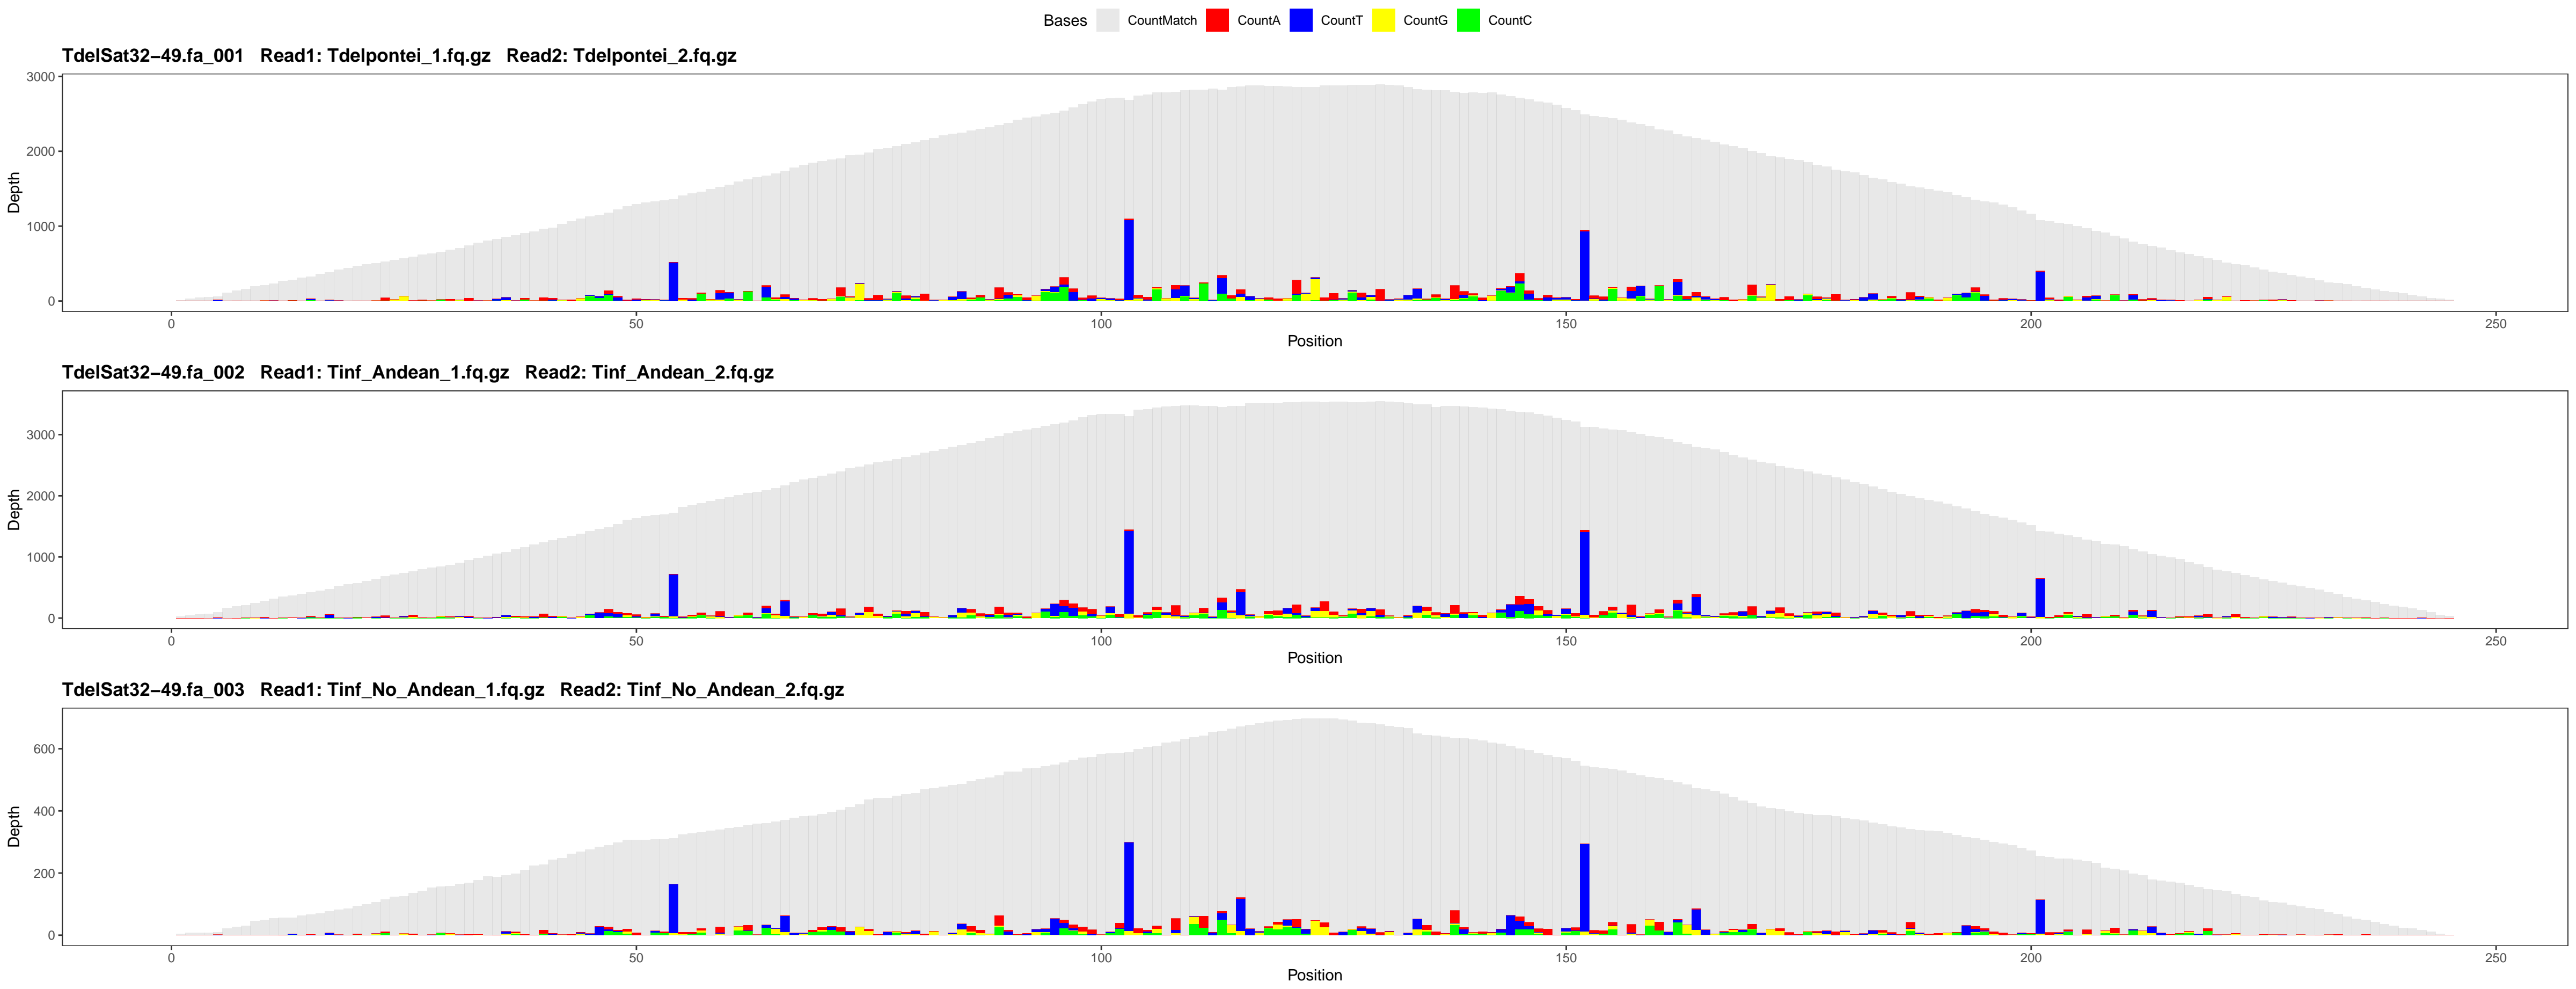

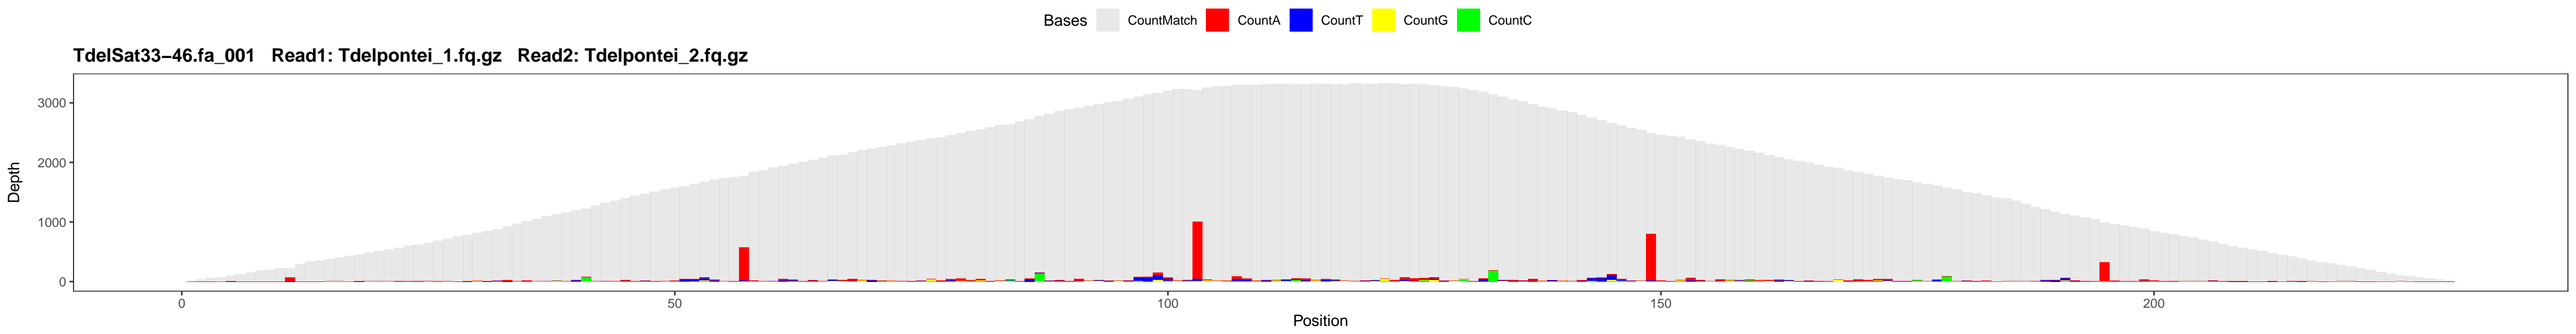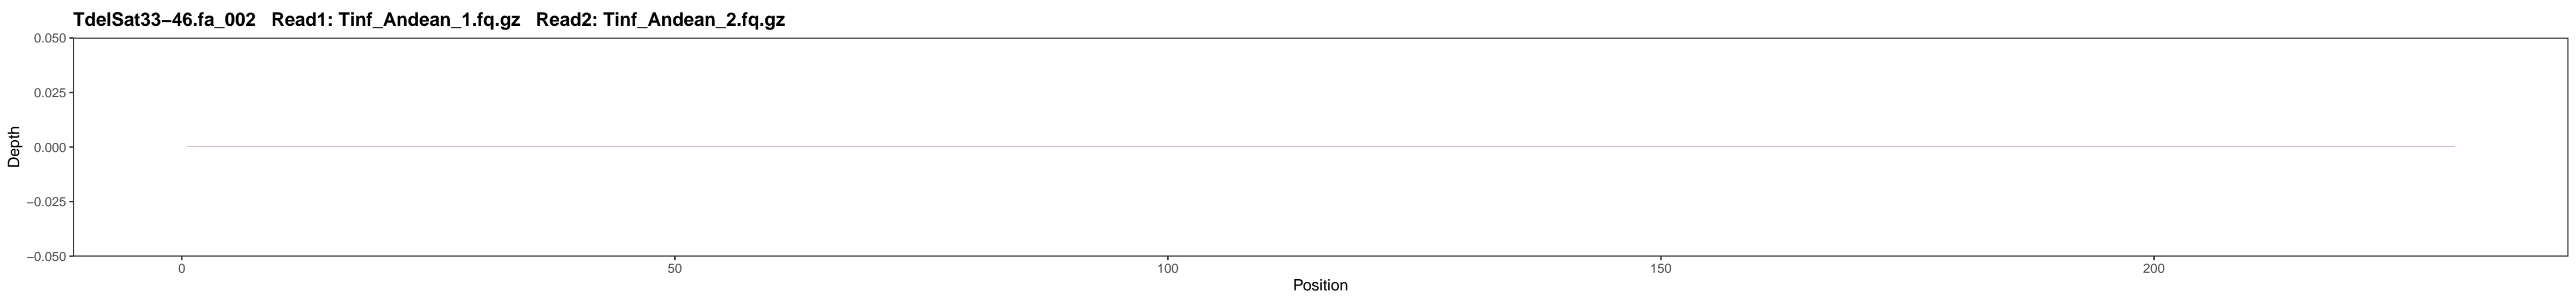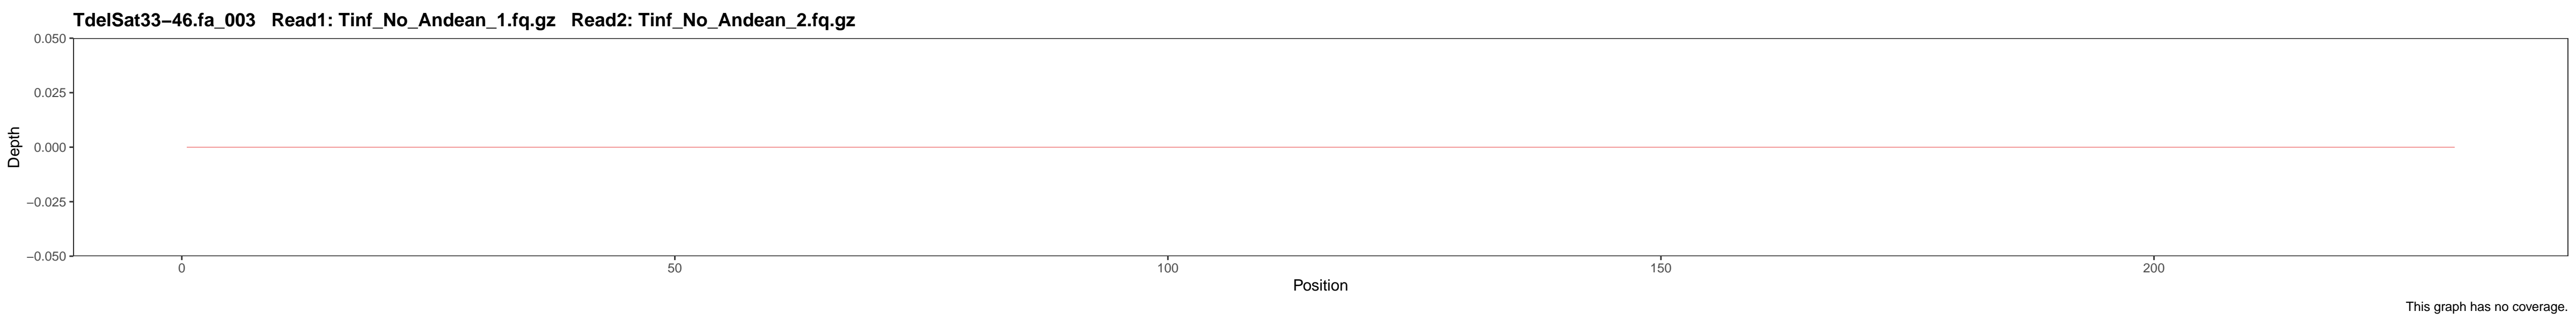

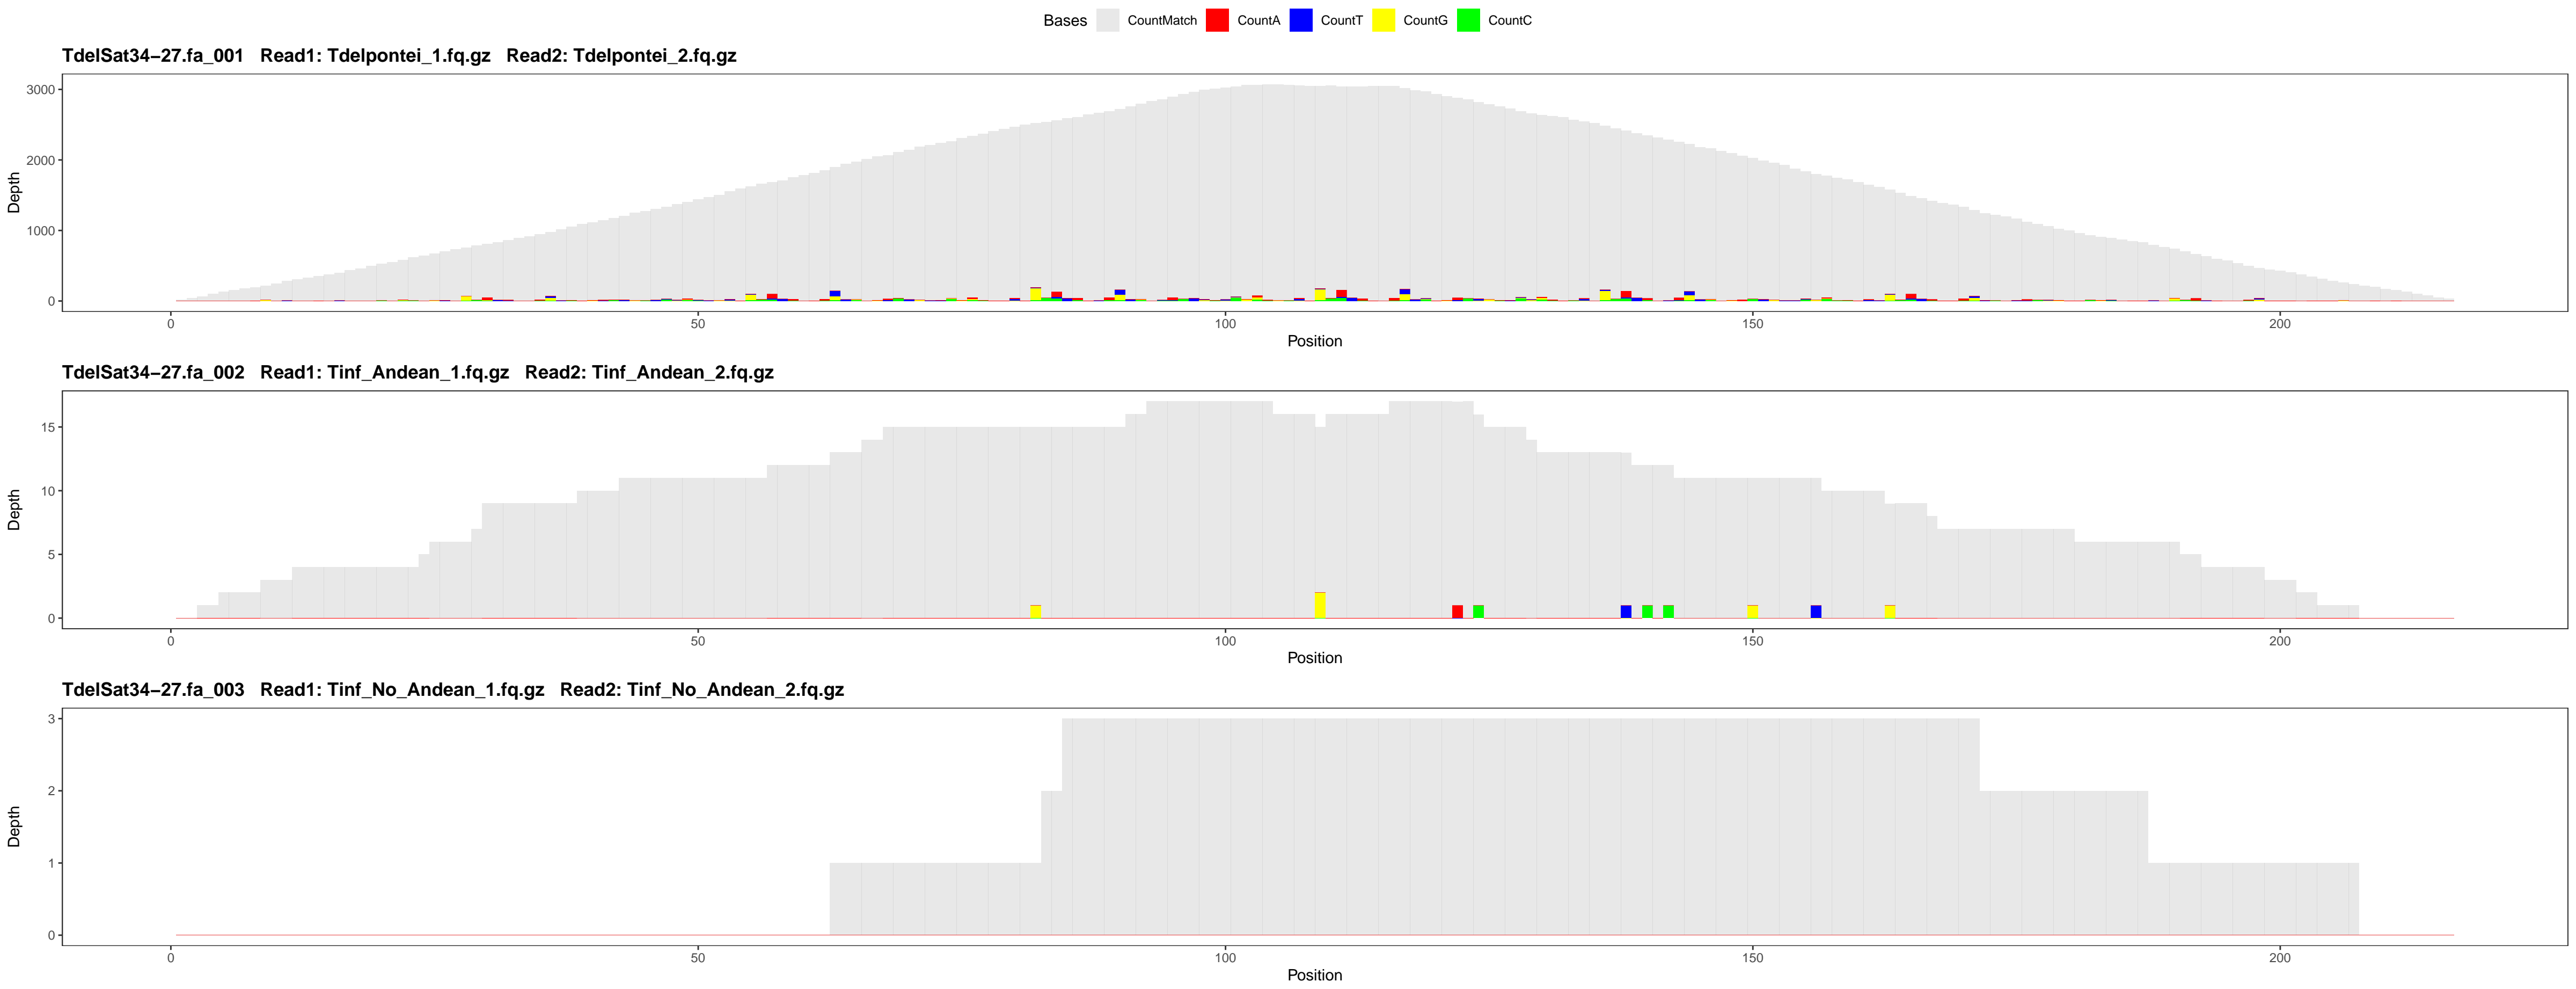

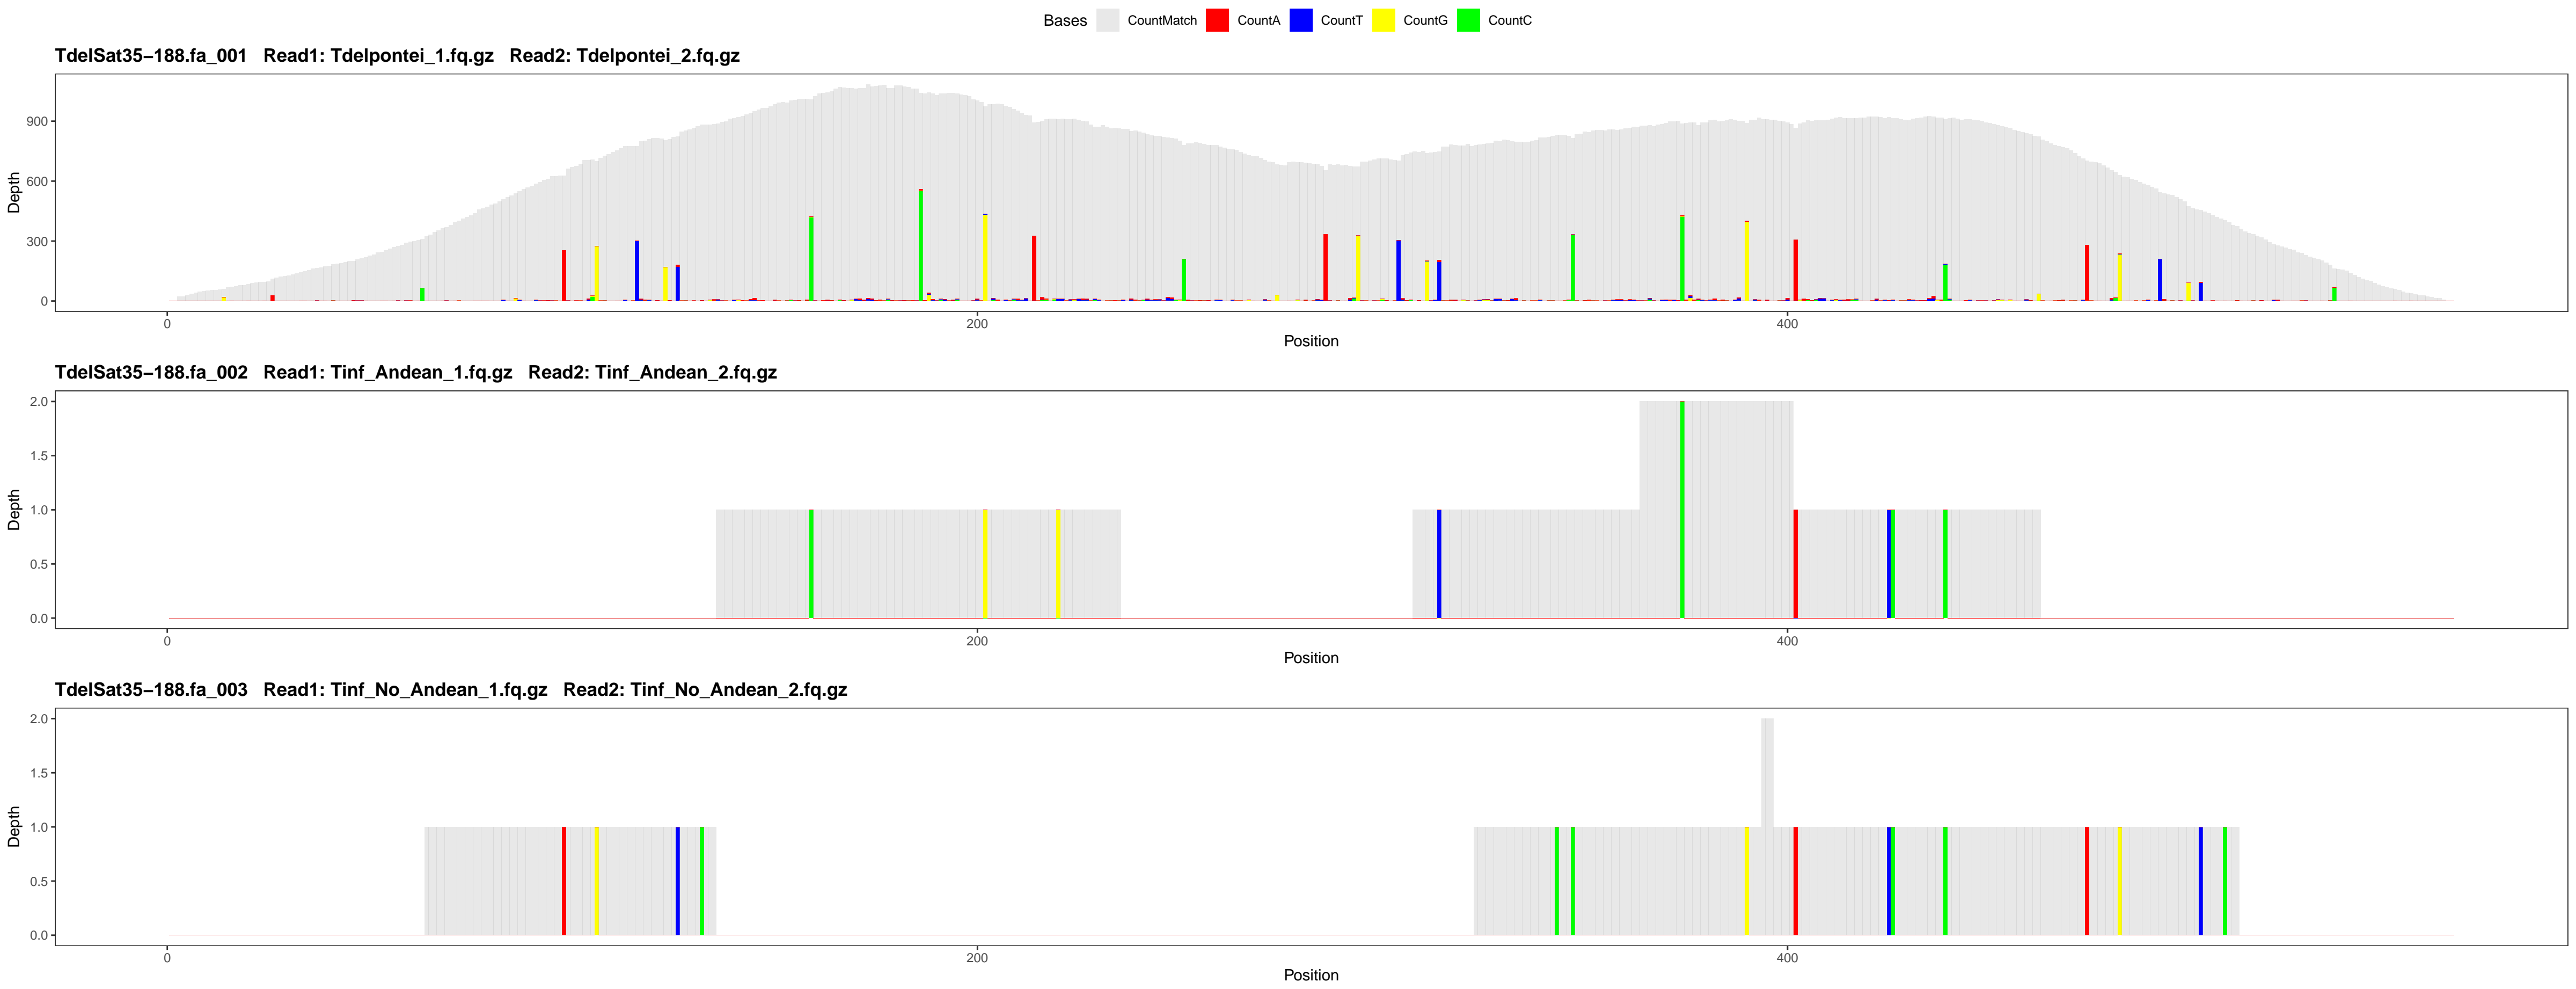

Bases CountMatch CountA CountT CountG CountC

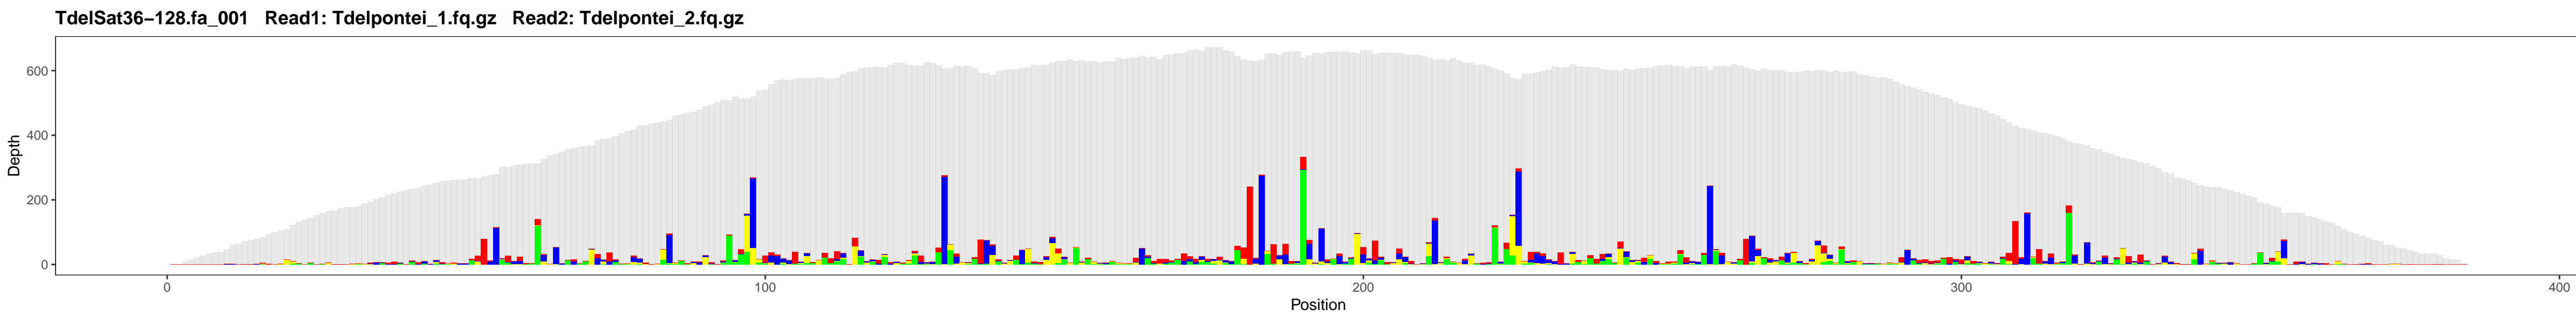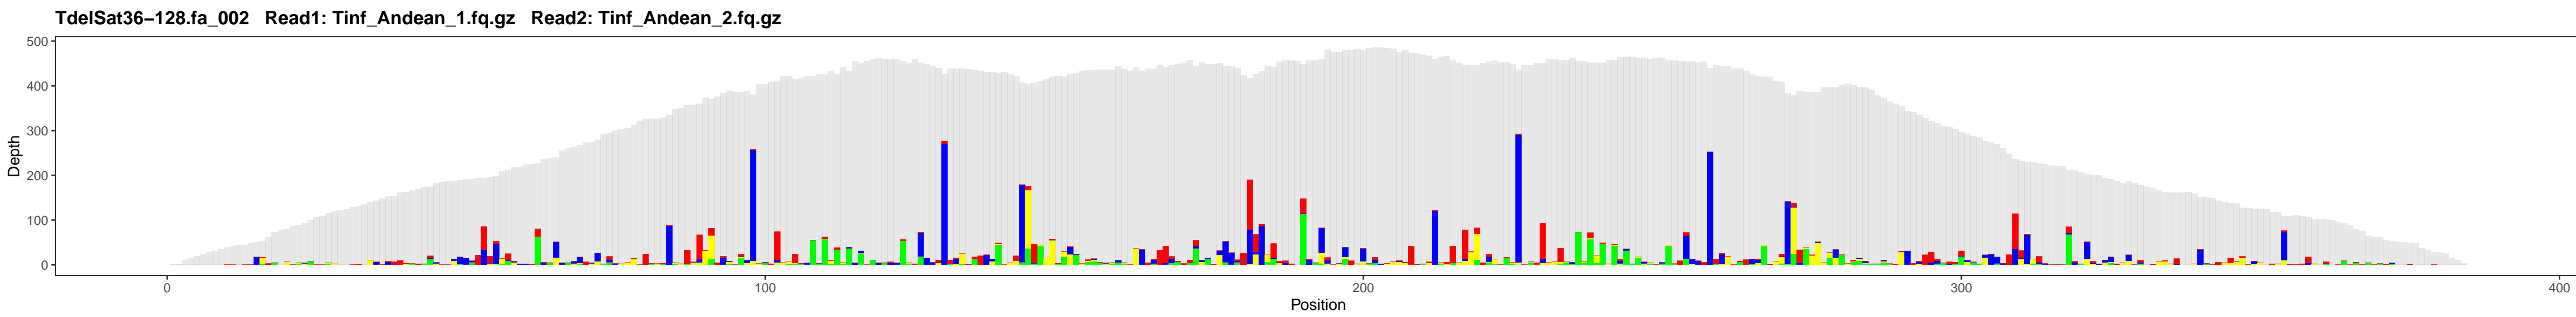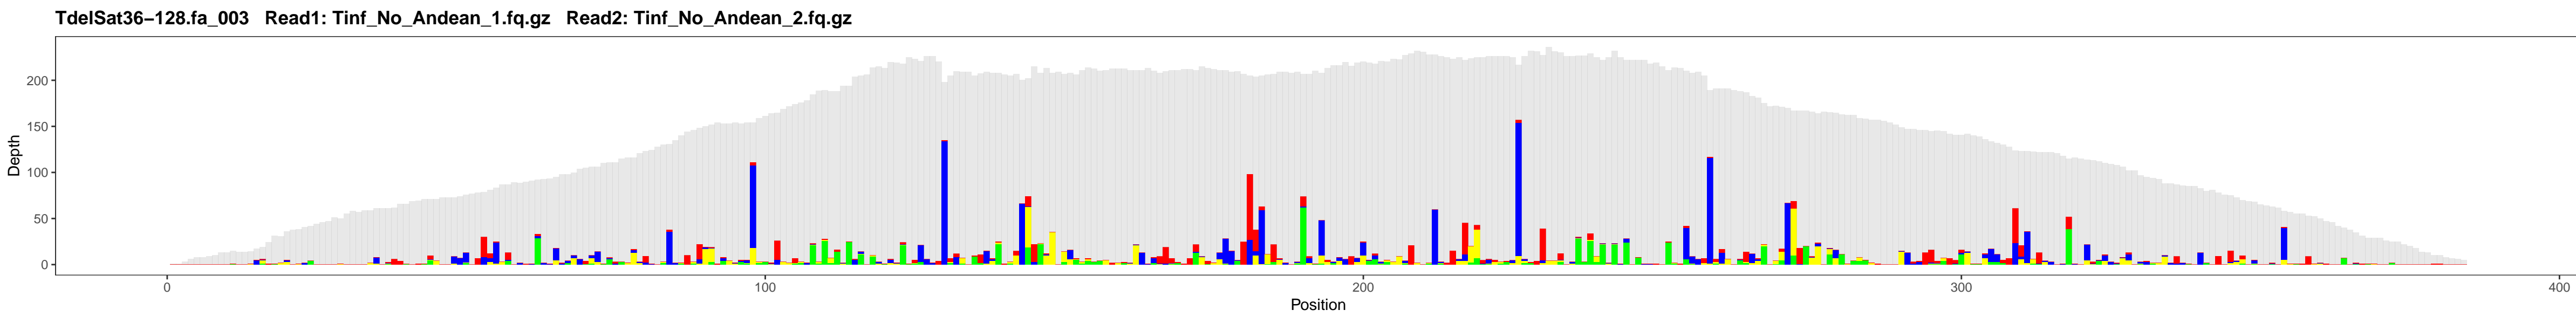

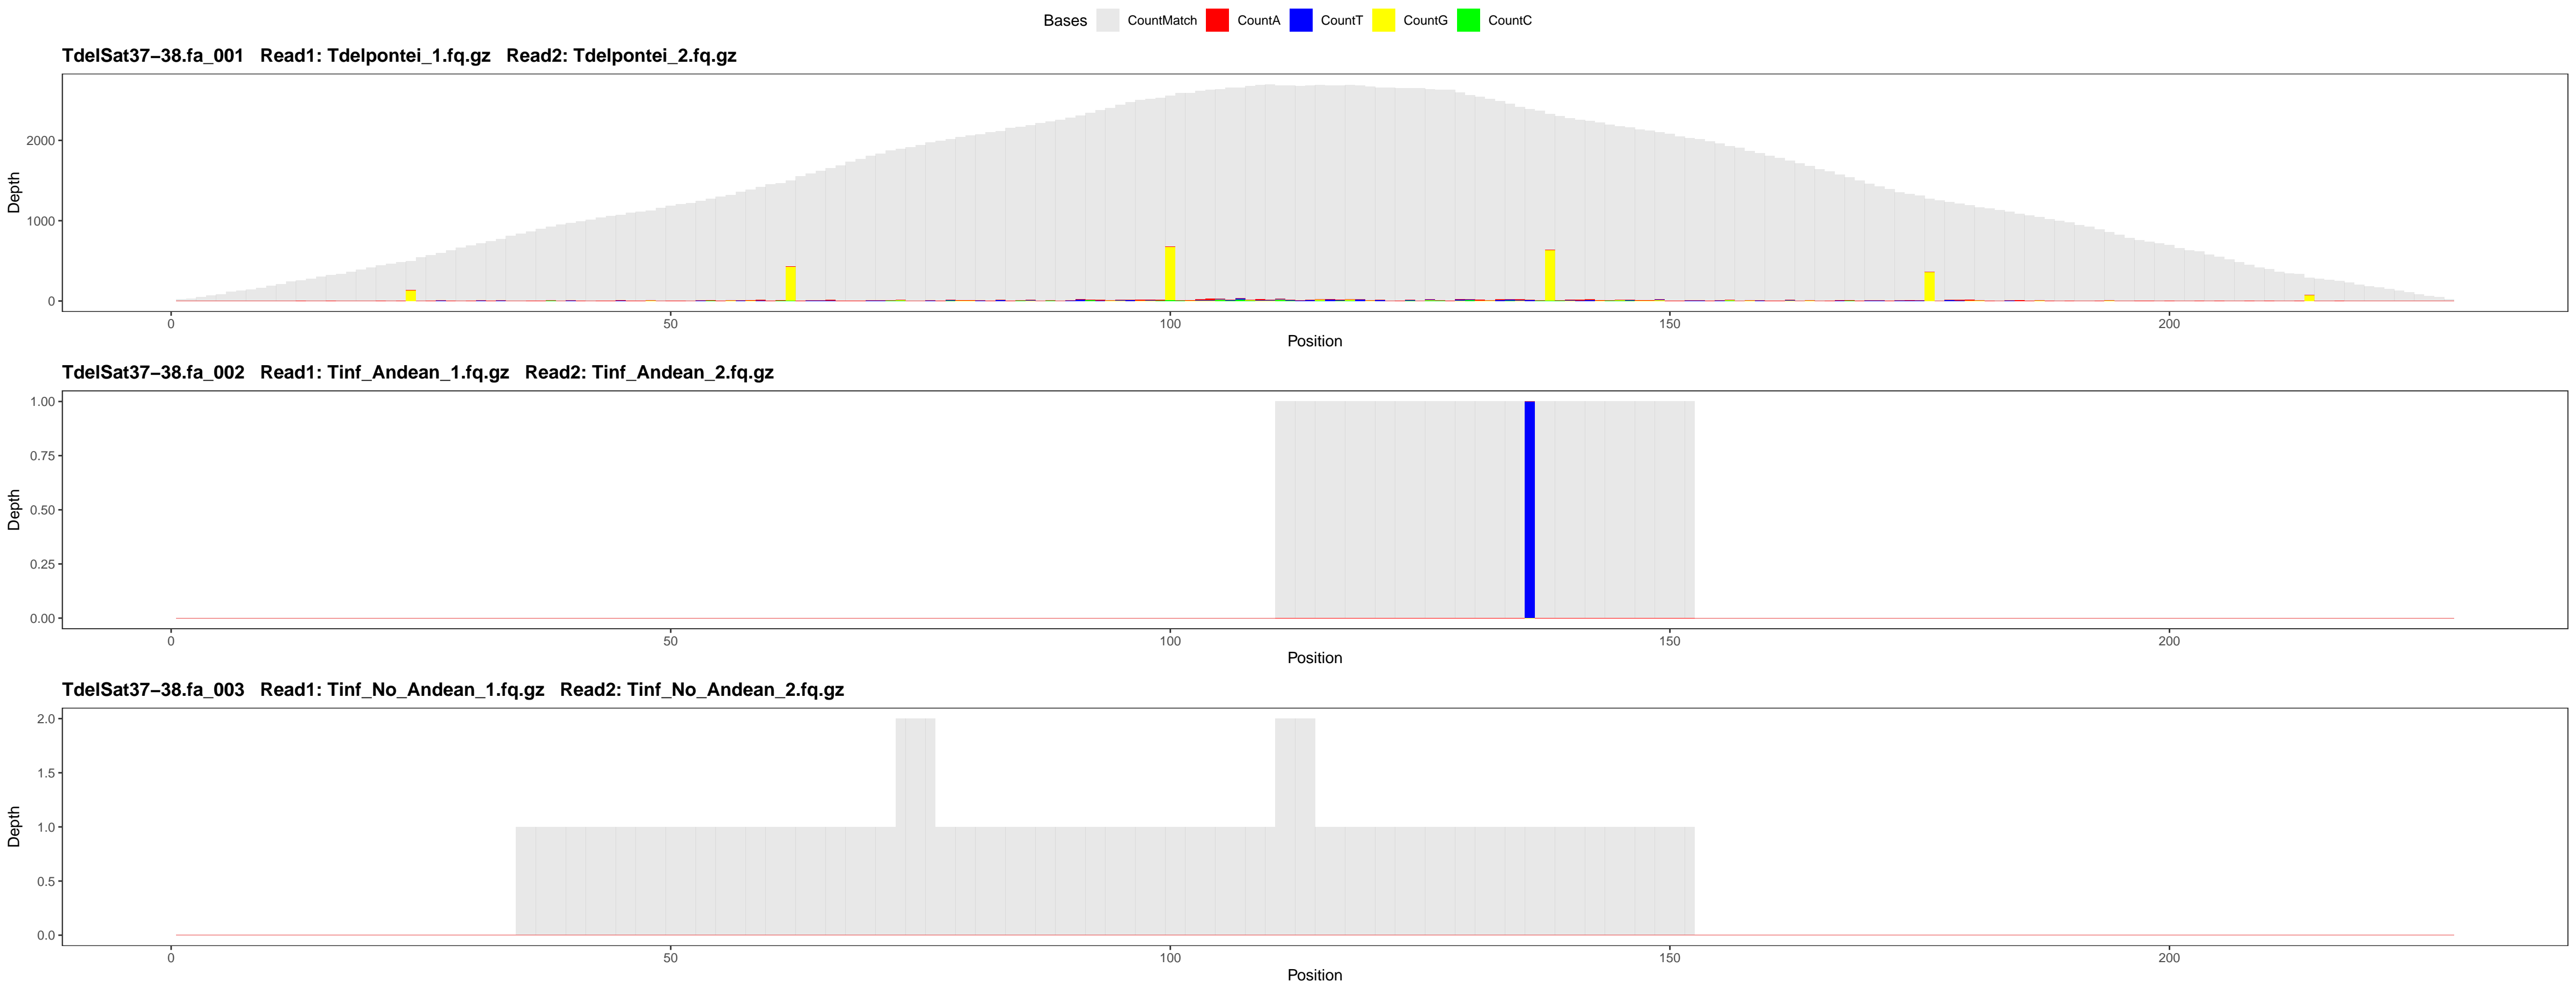

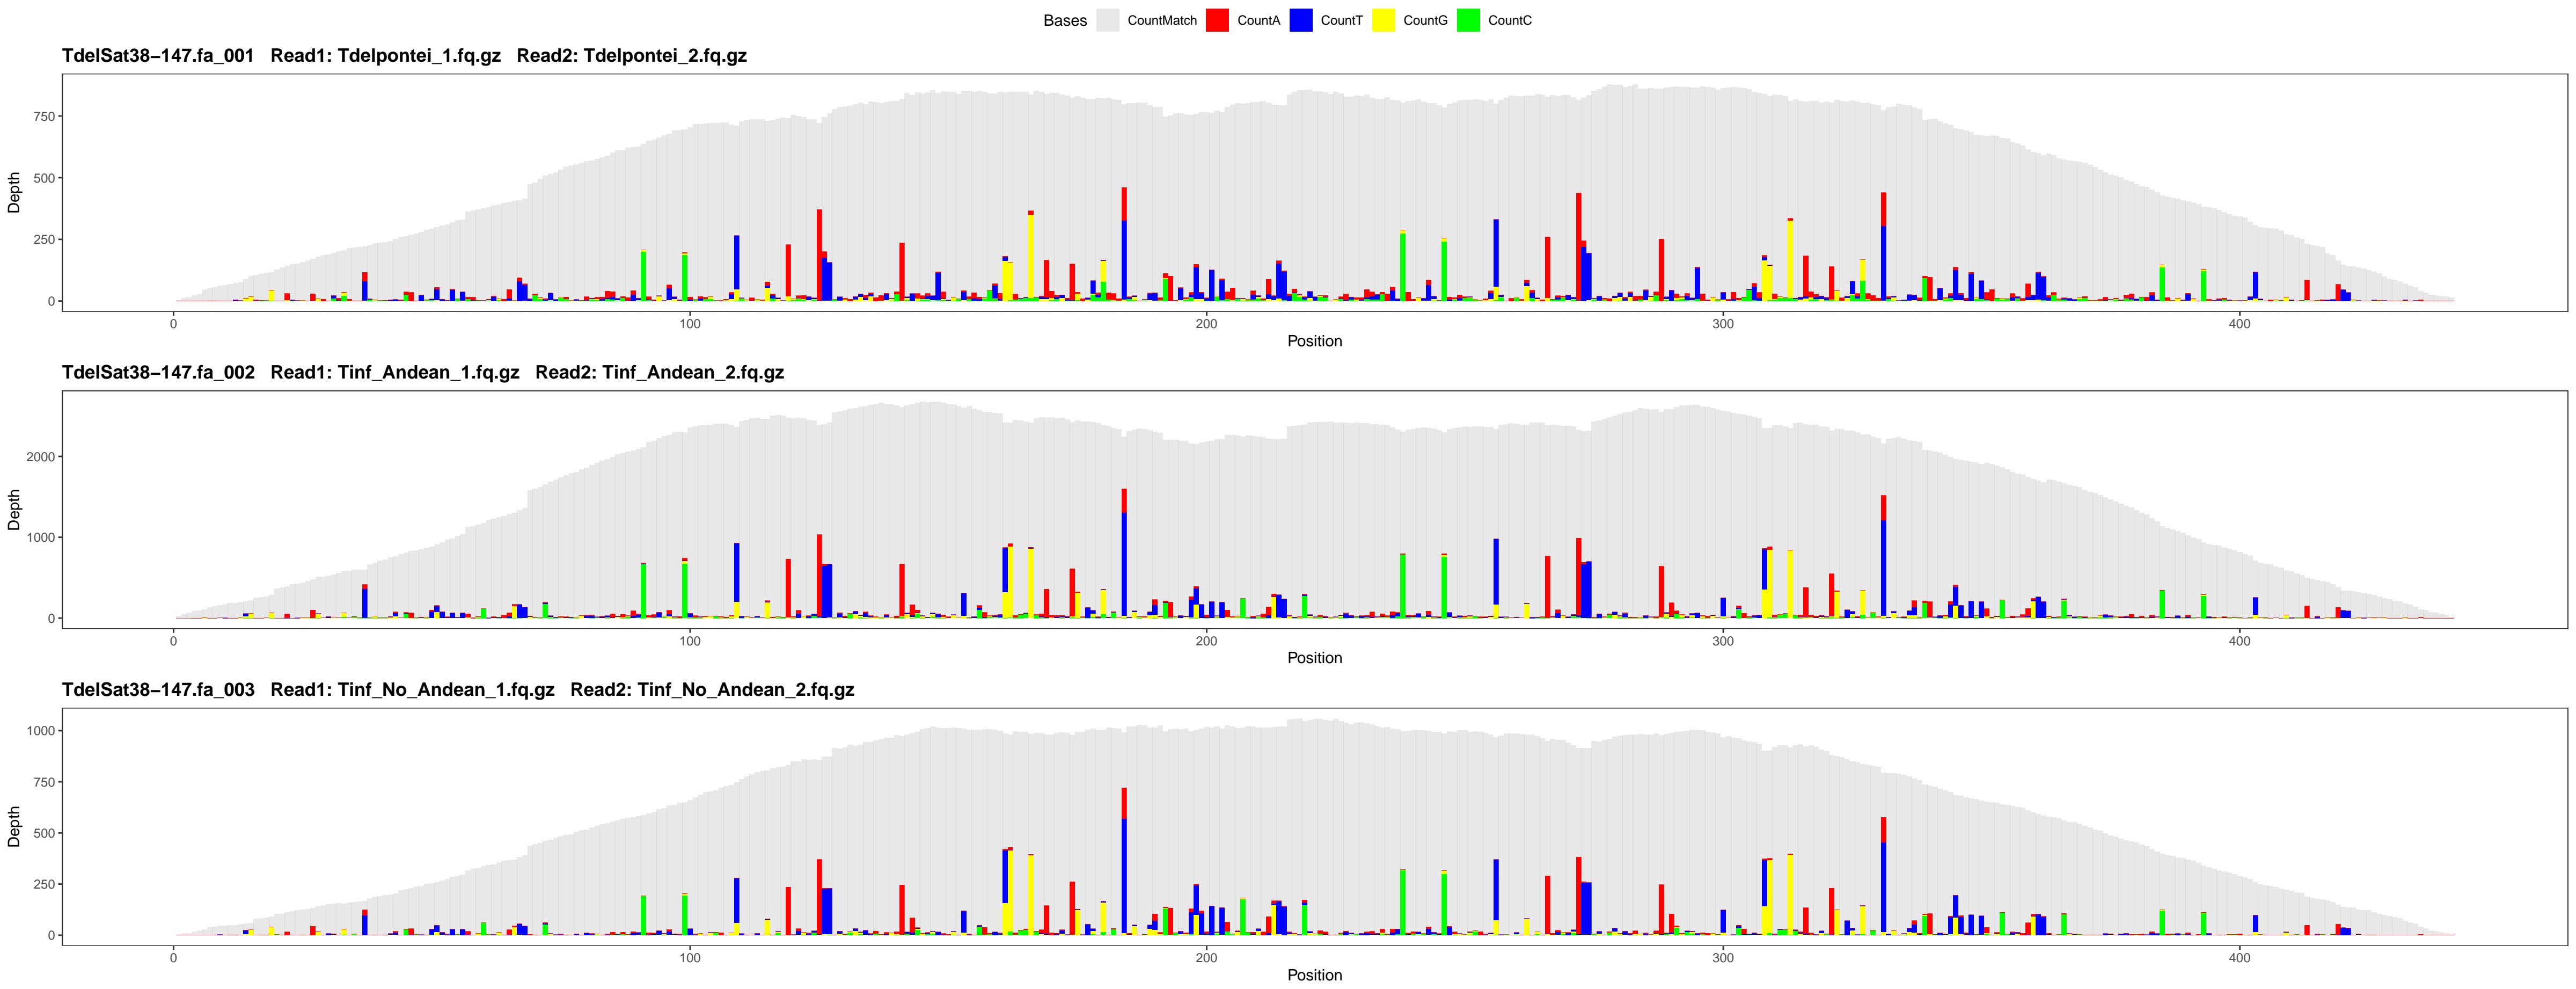



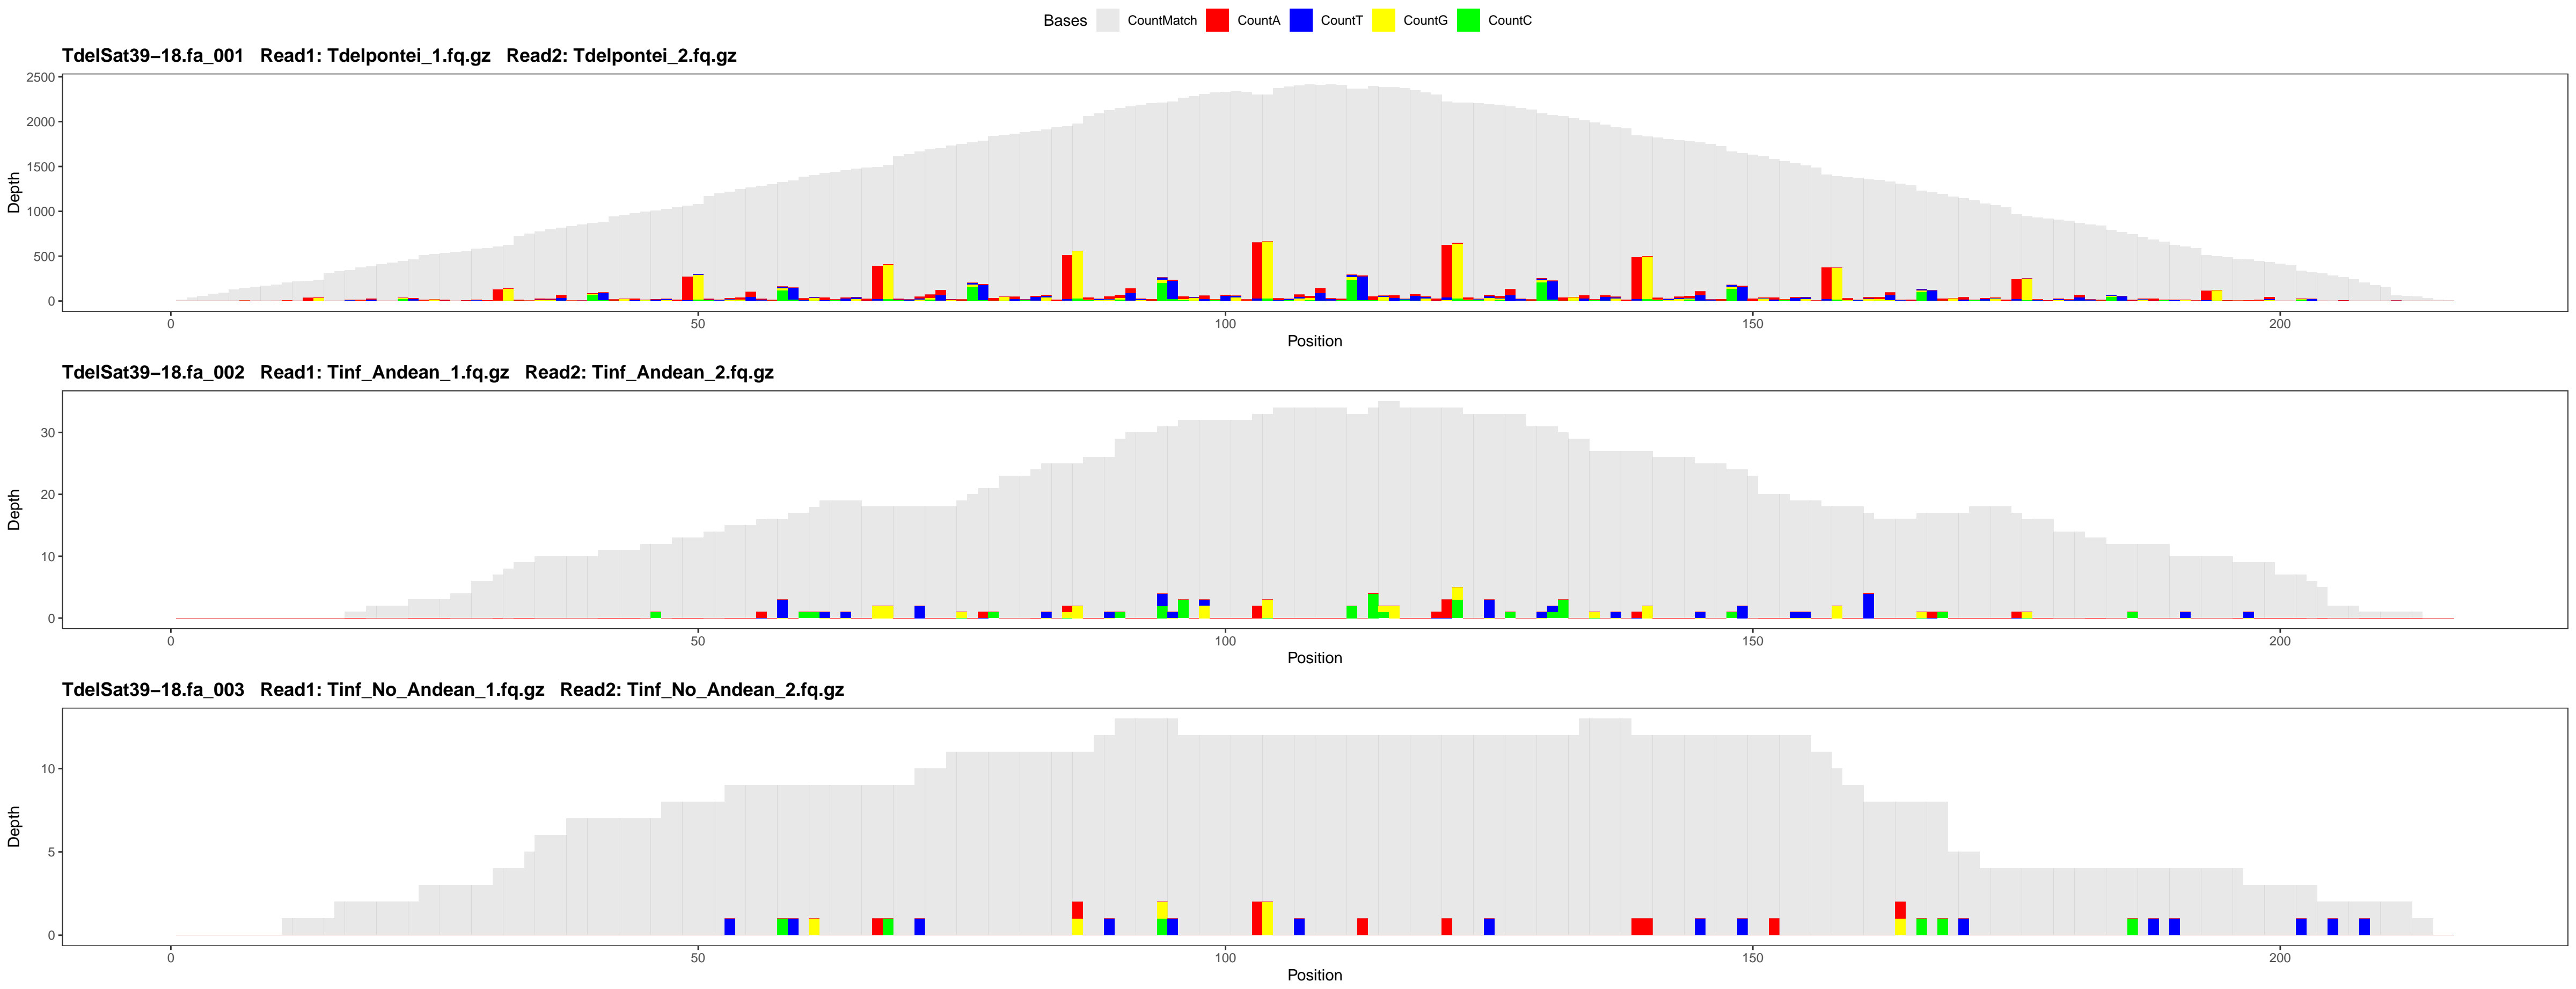

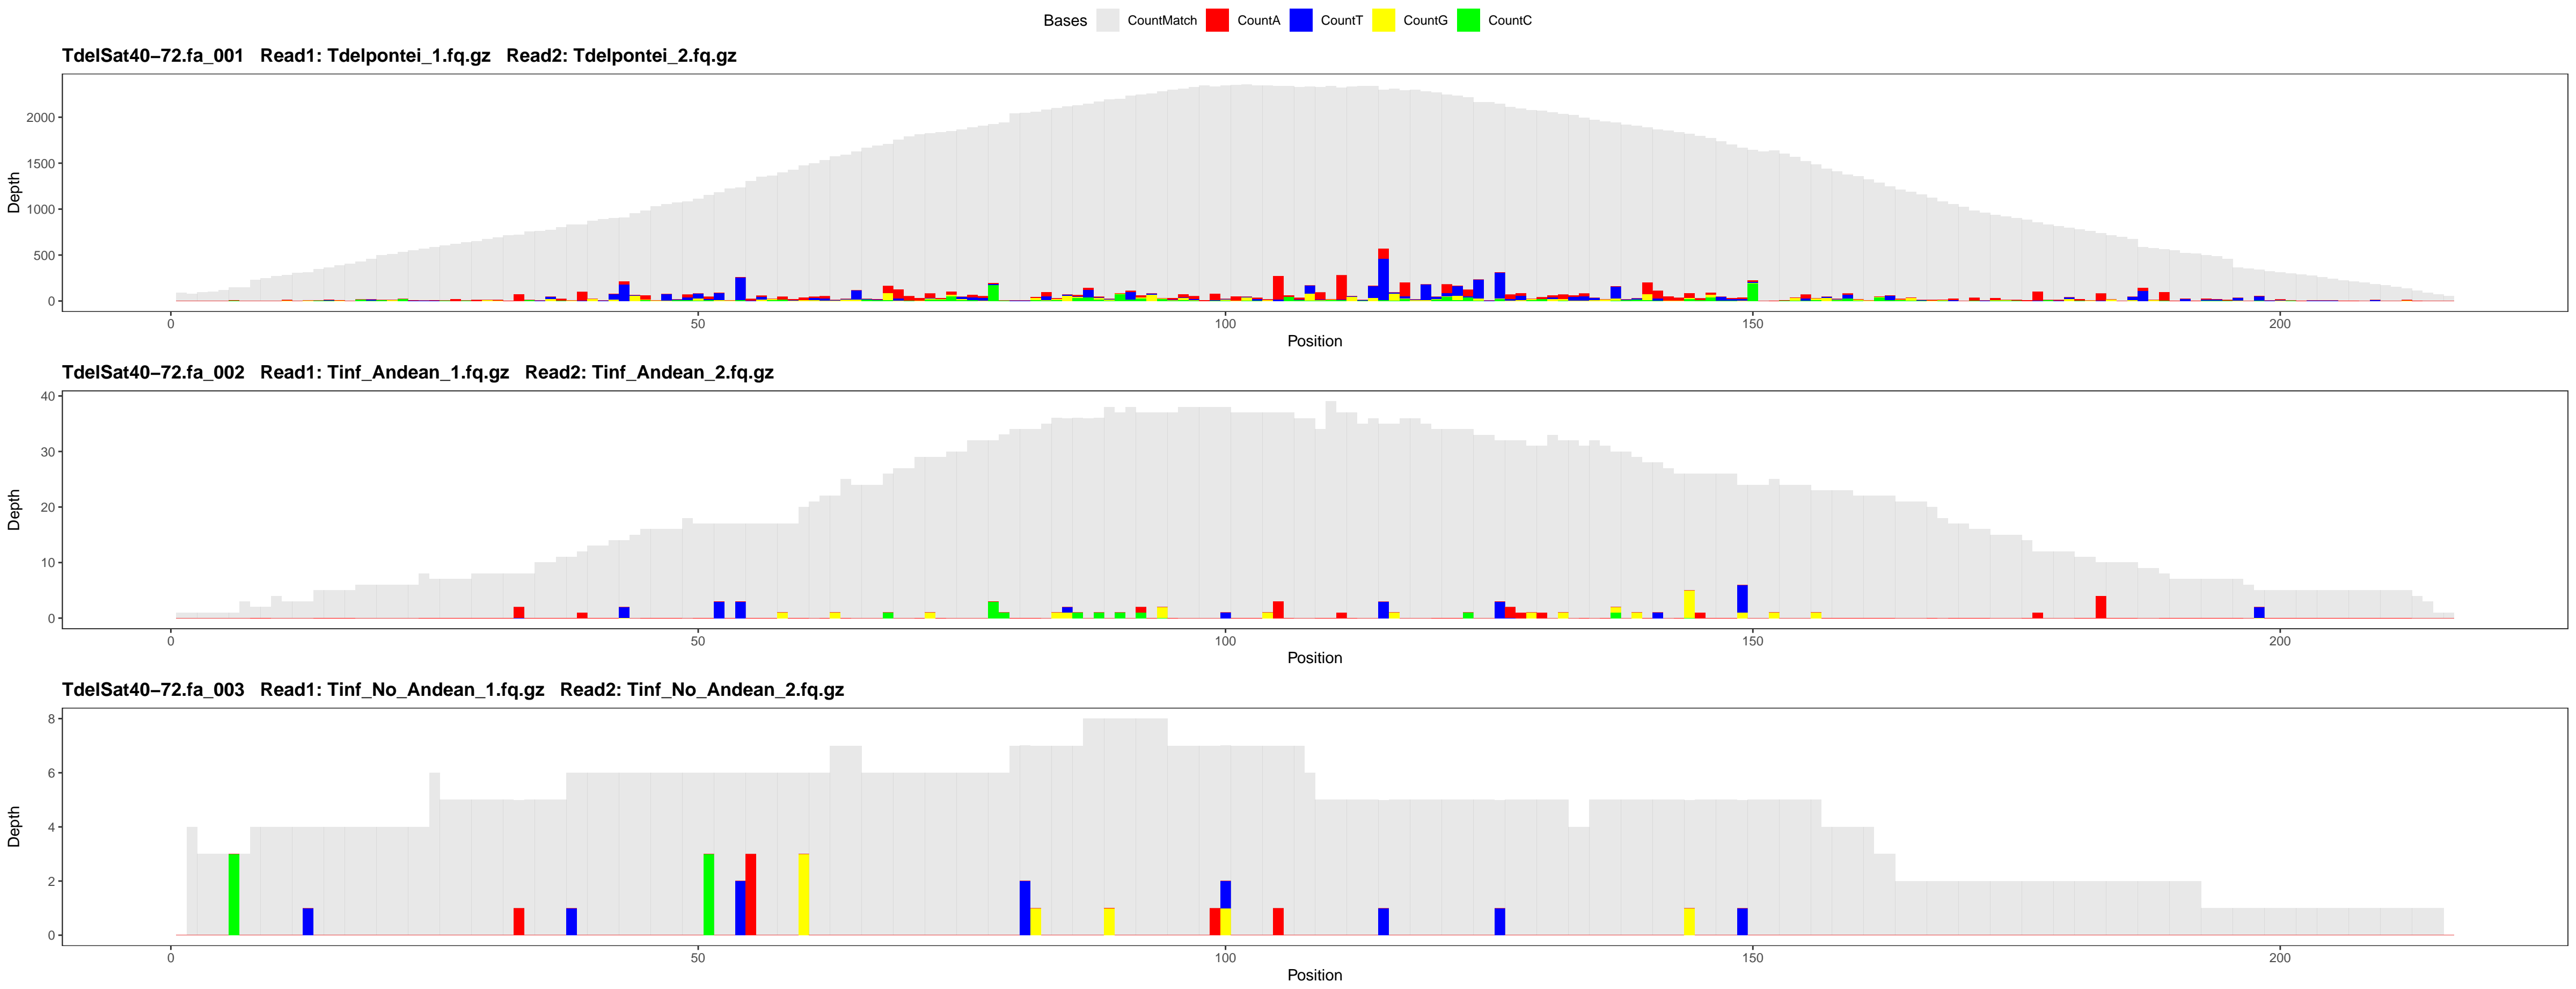

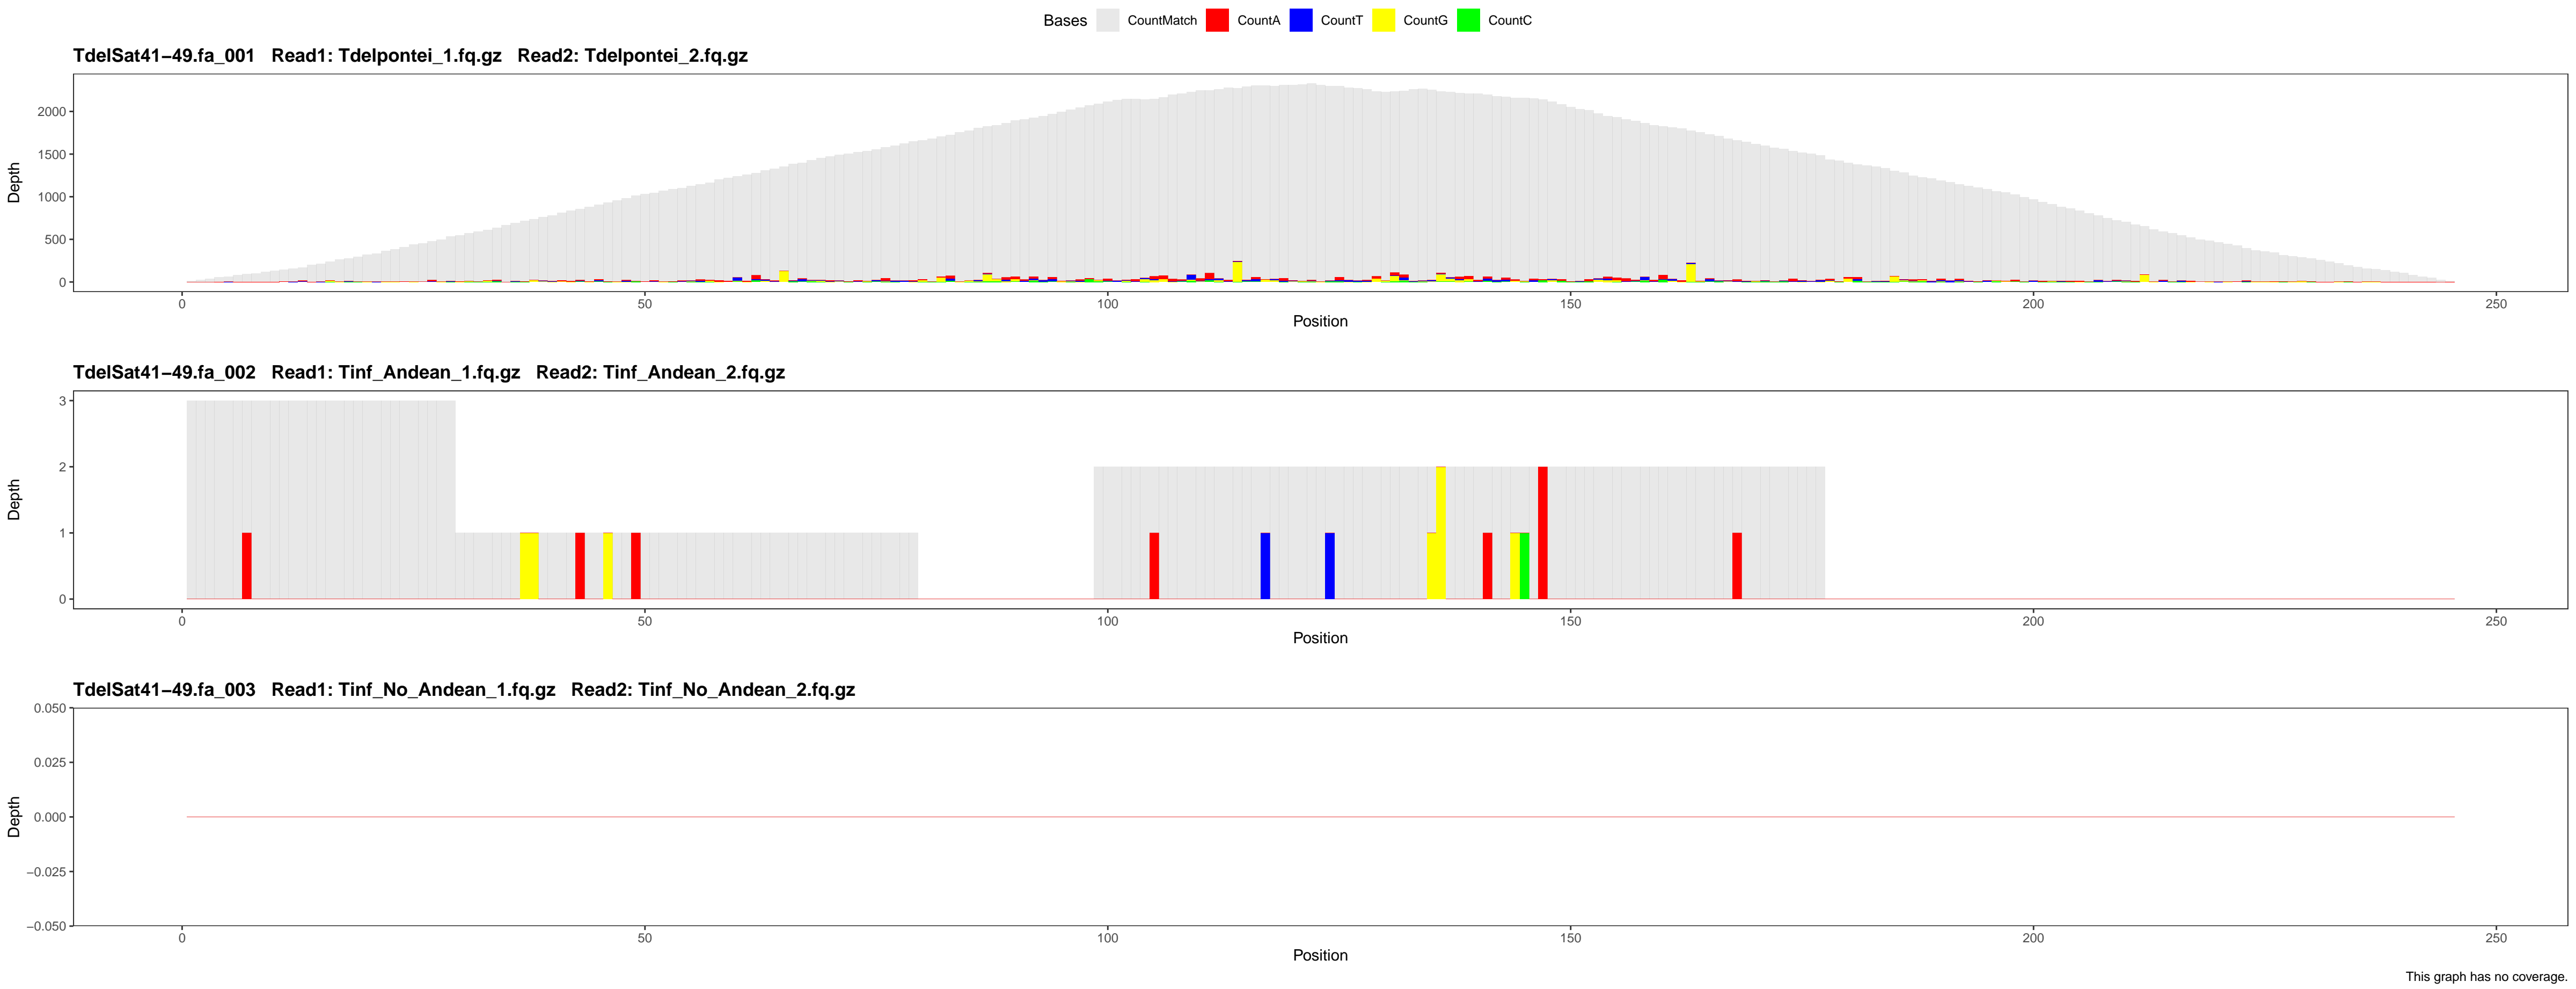

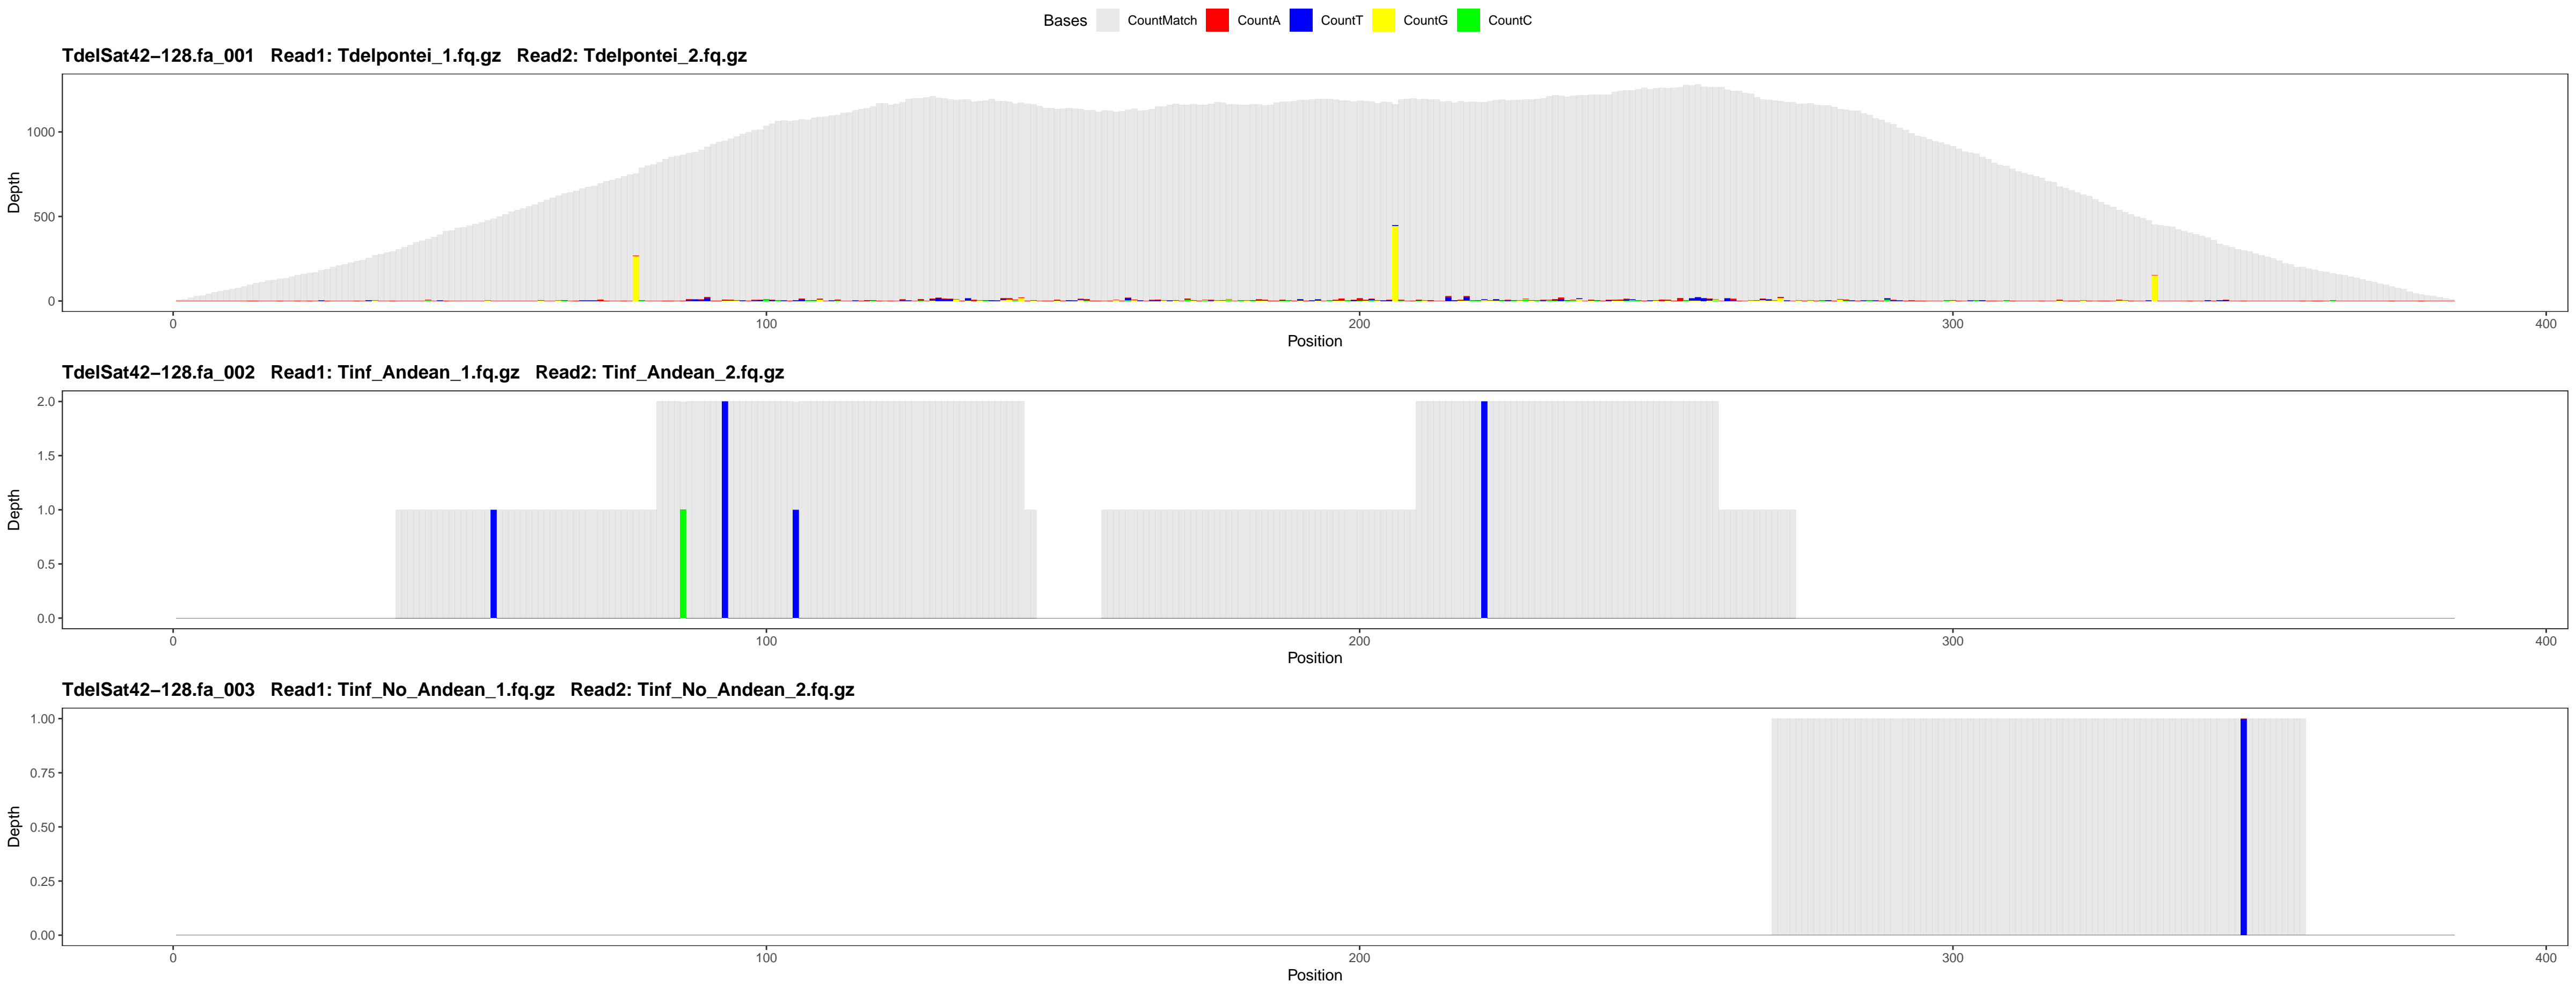

Bases CountMatch CountA CountT CountG CountC

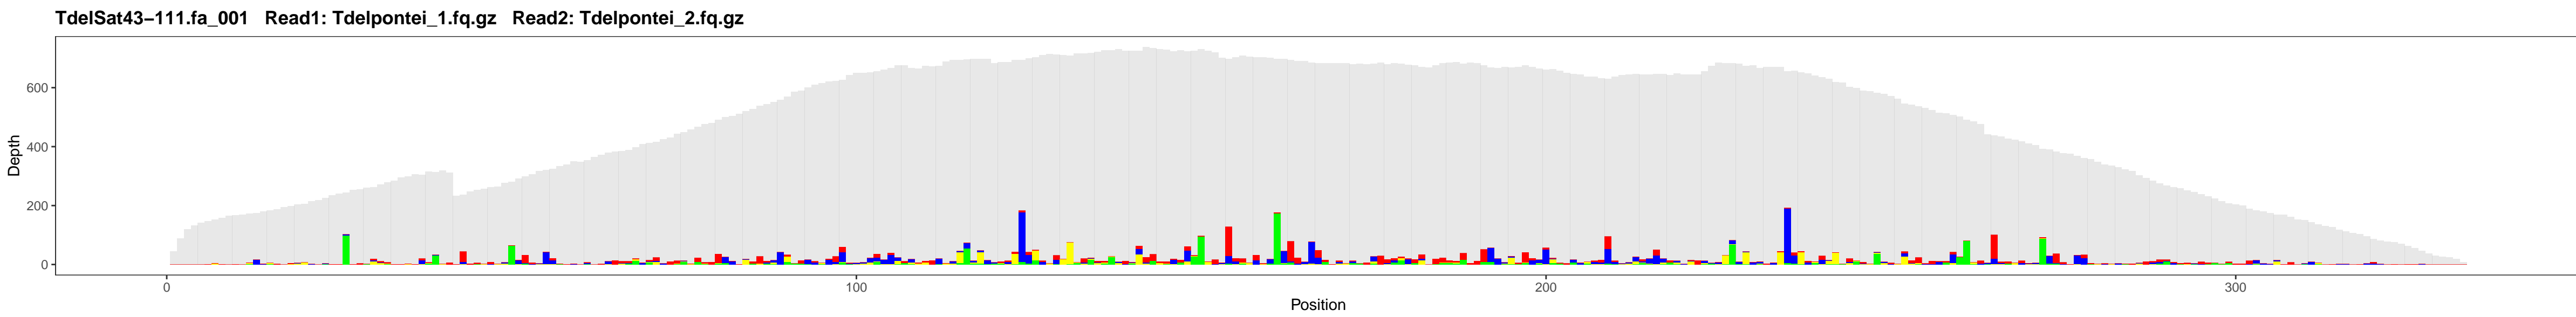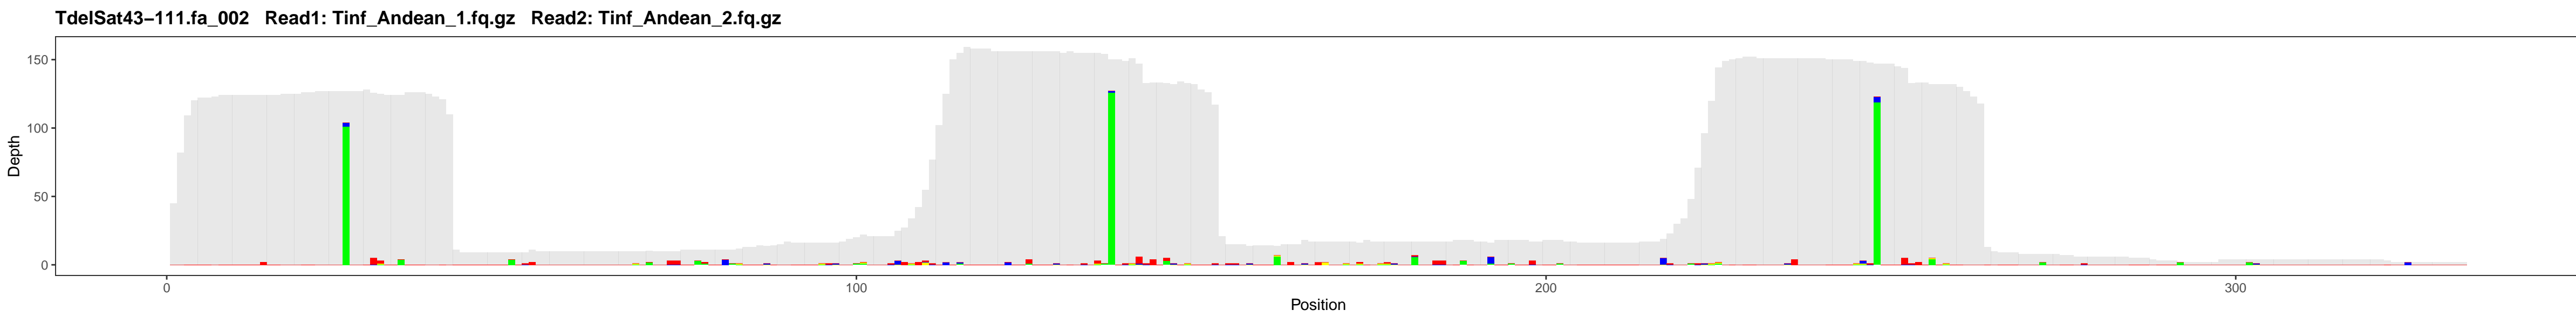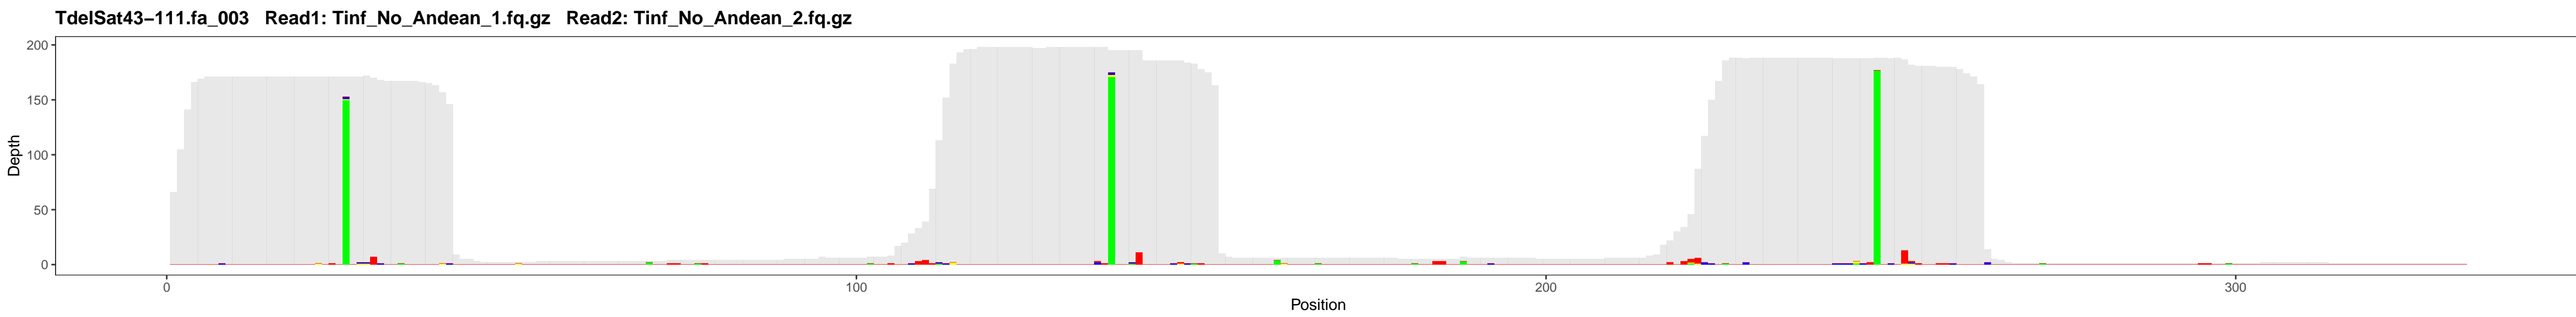

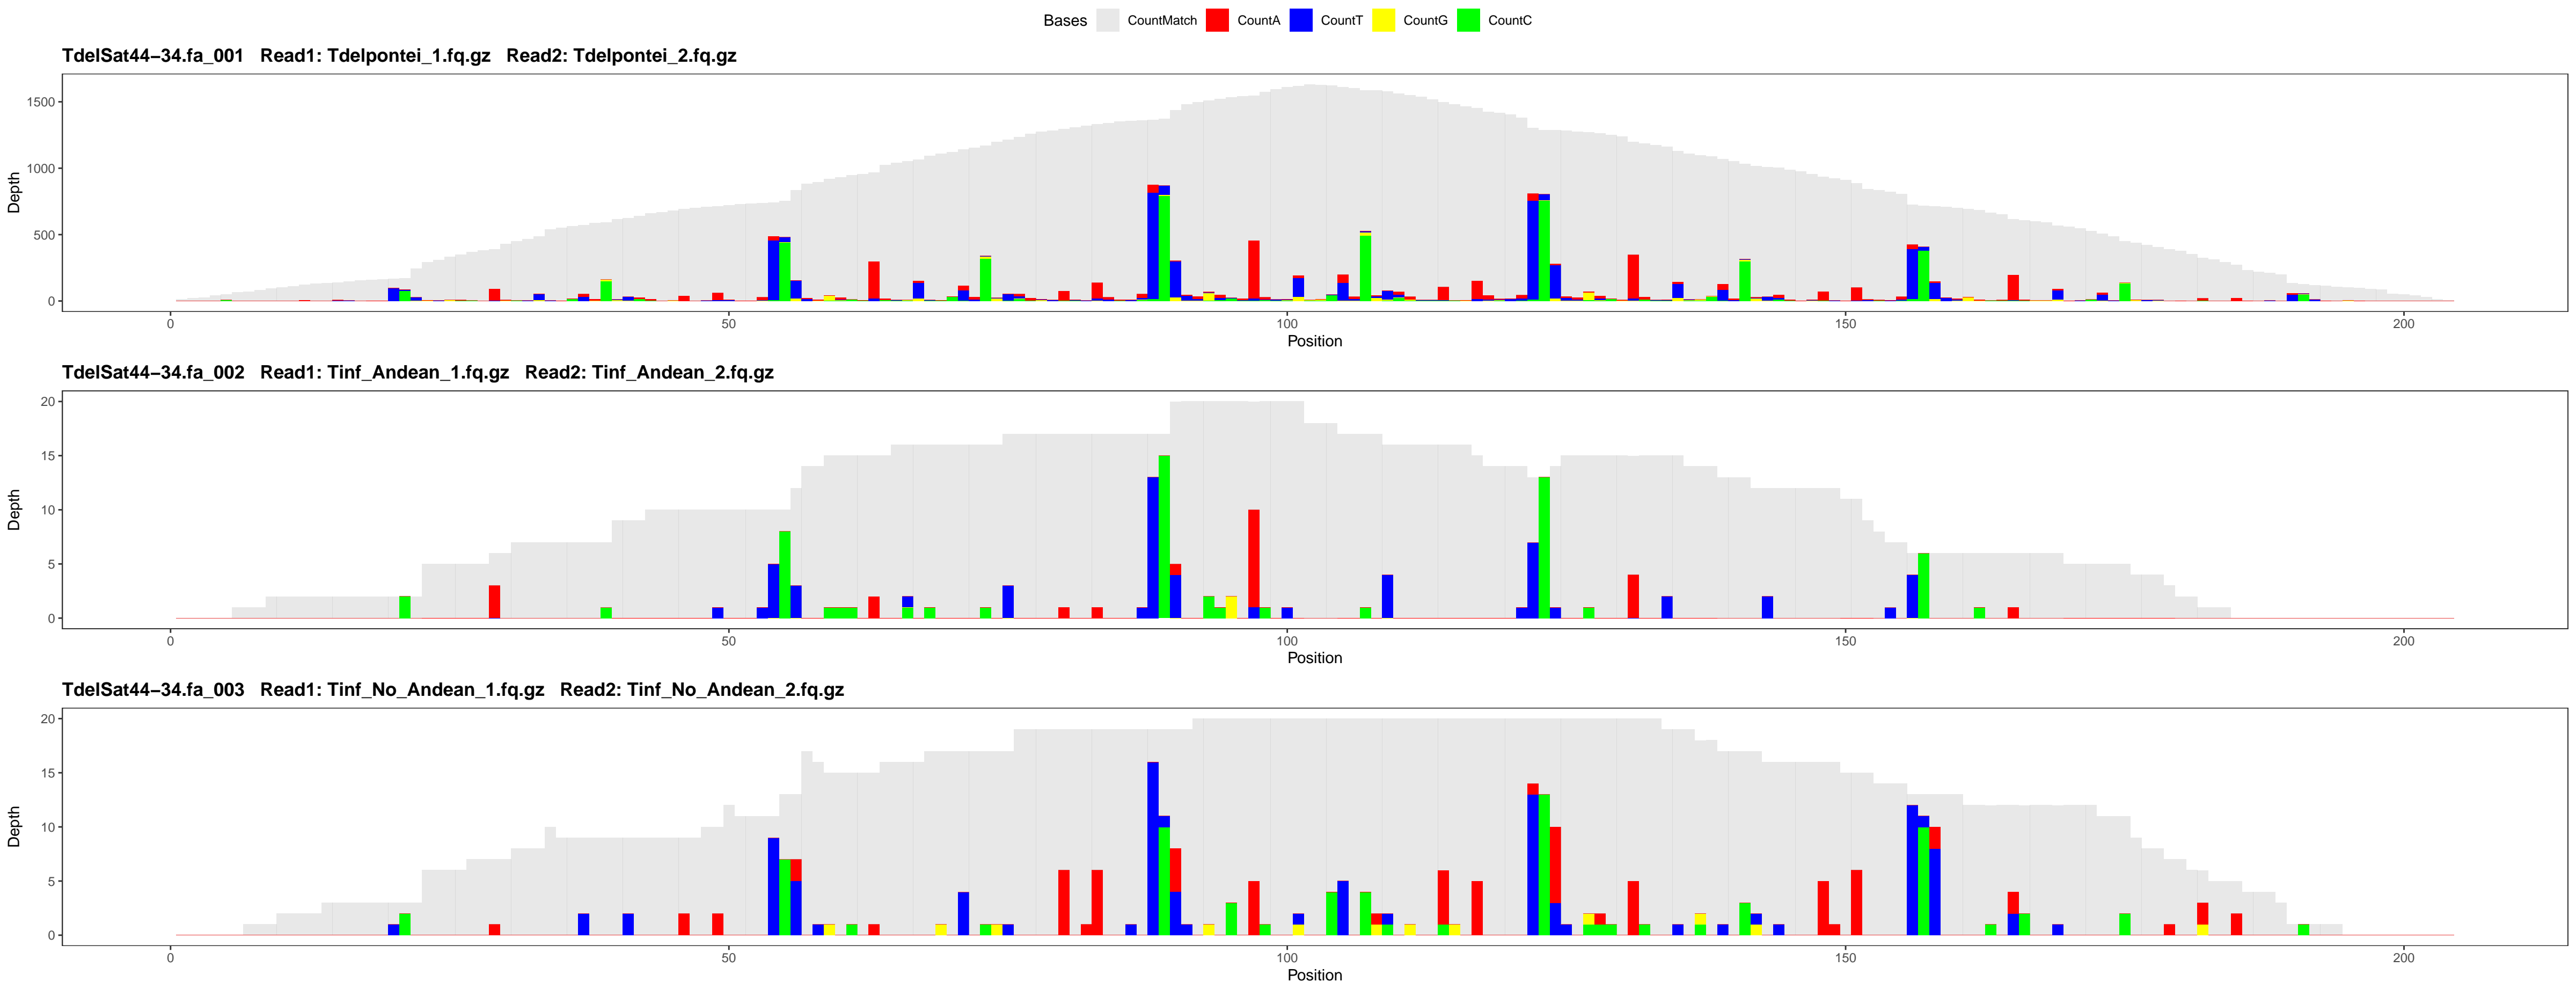

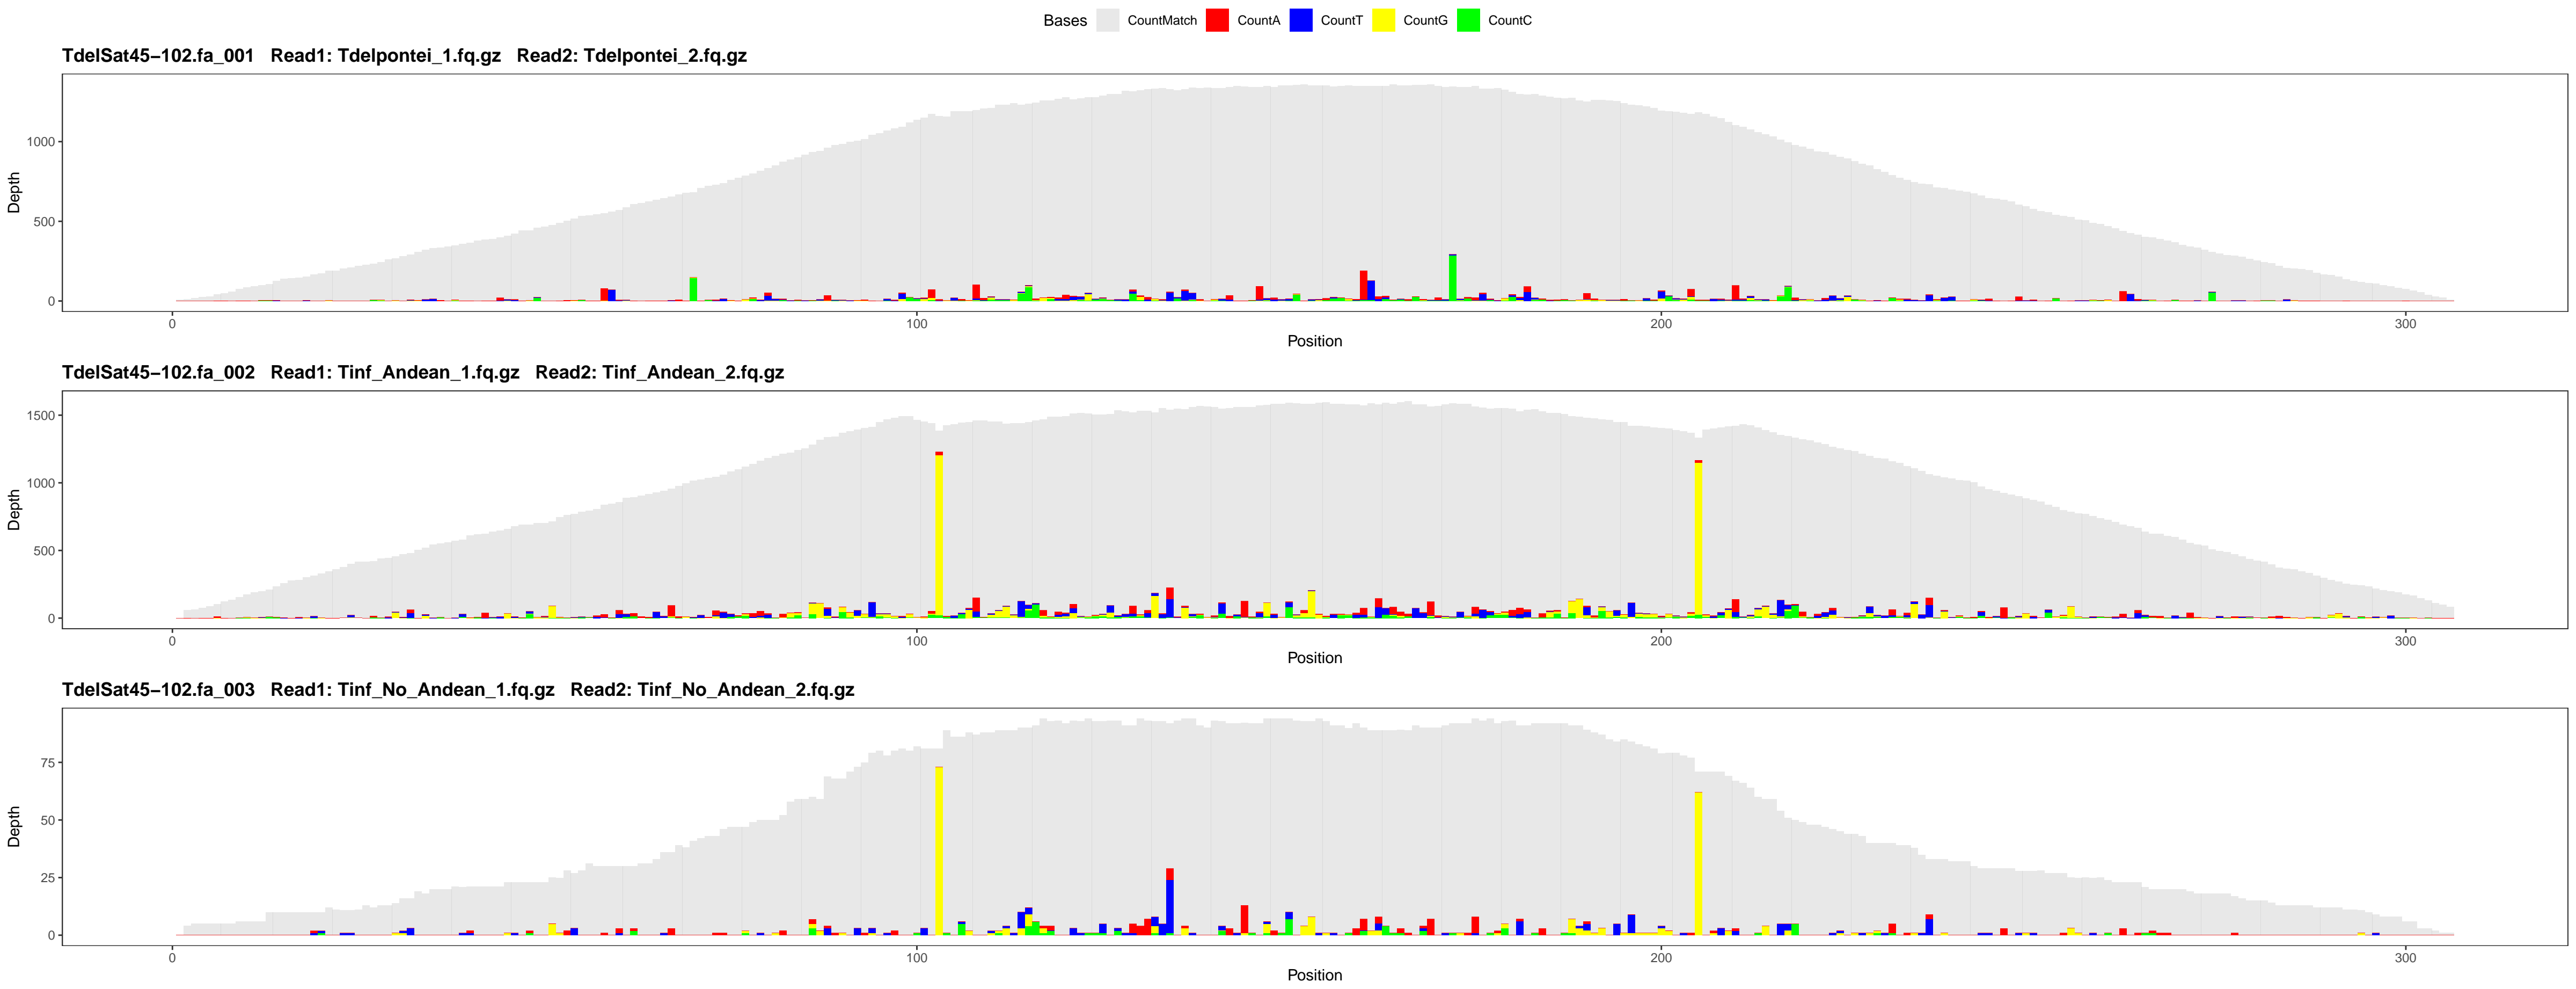

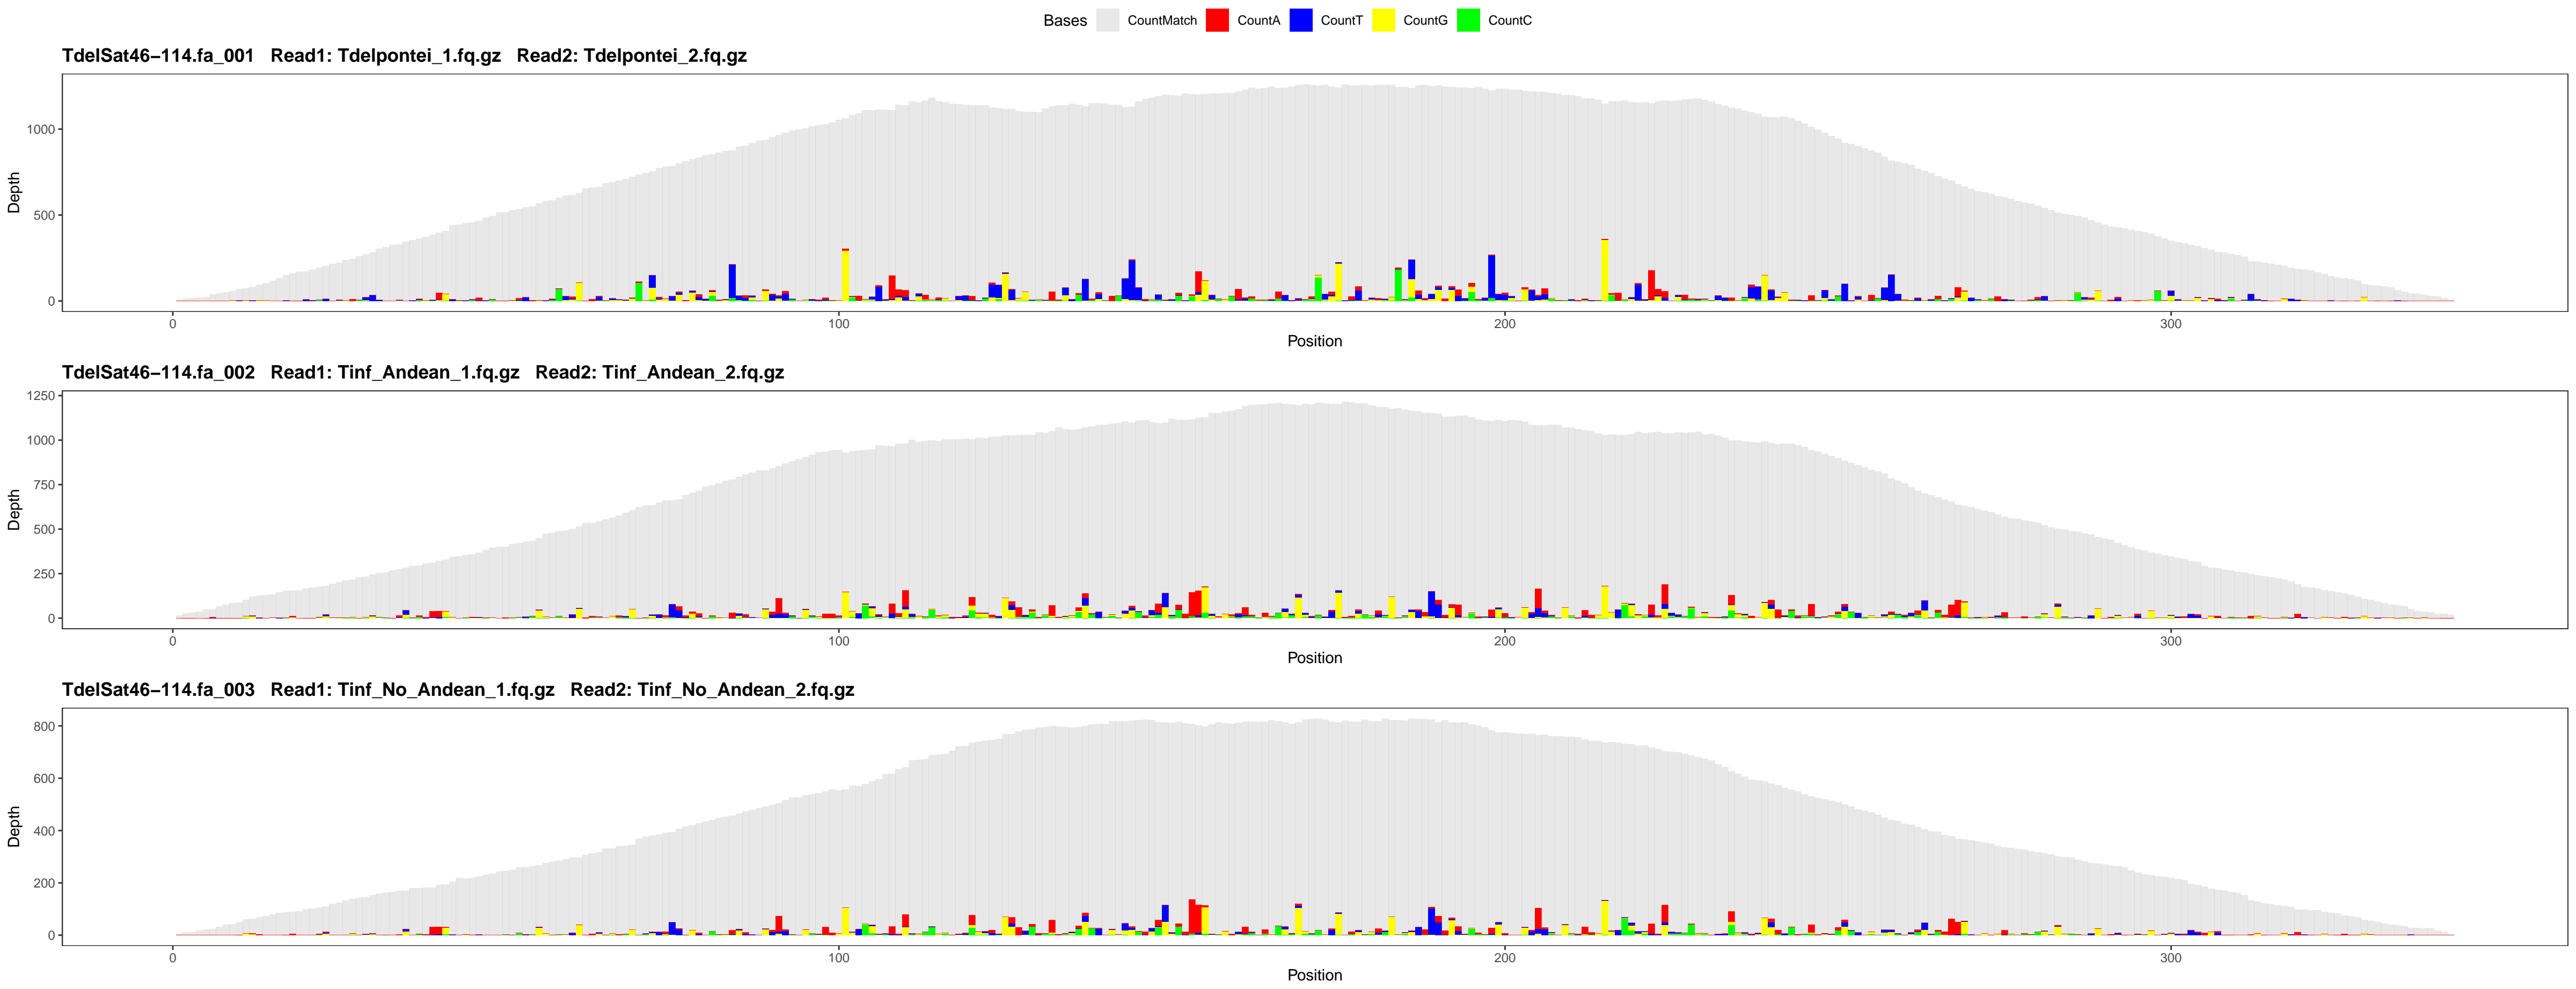



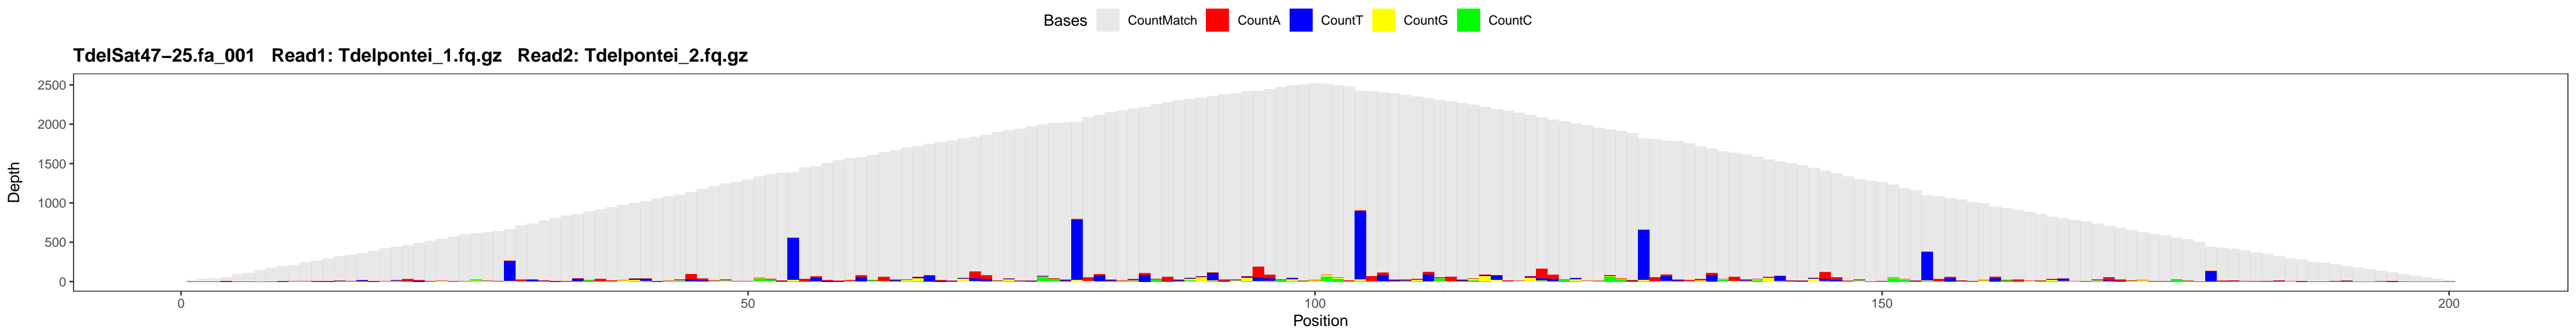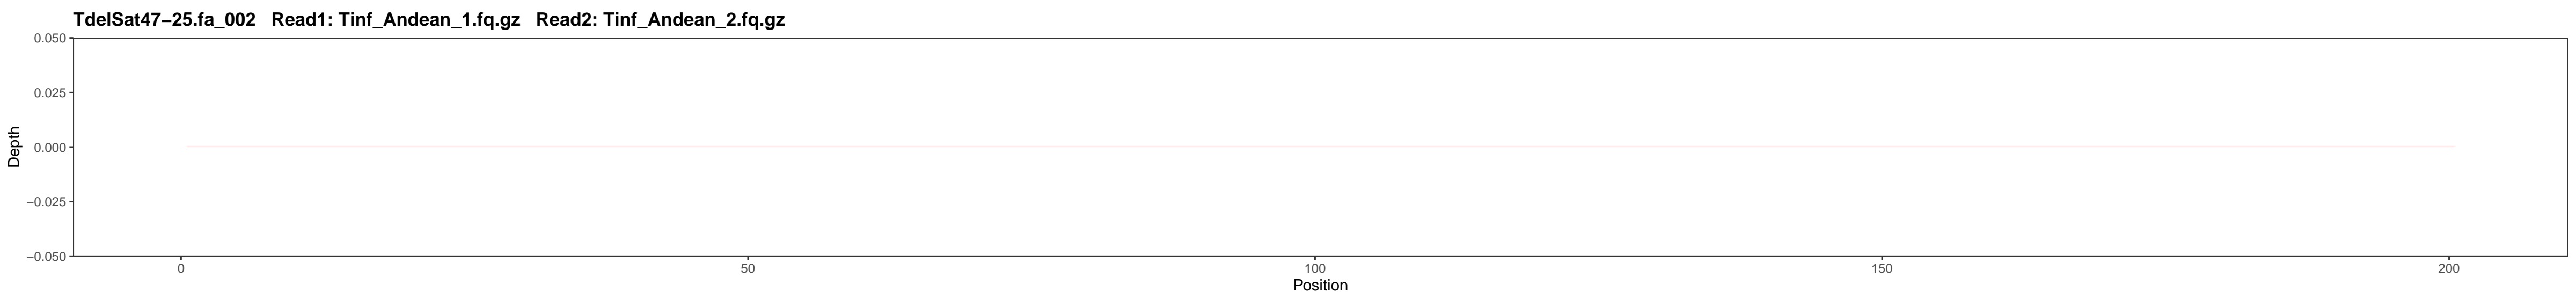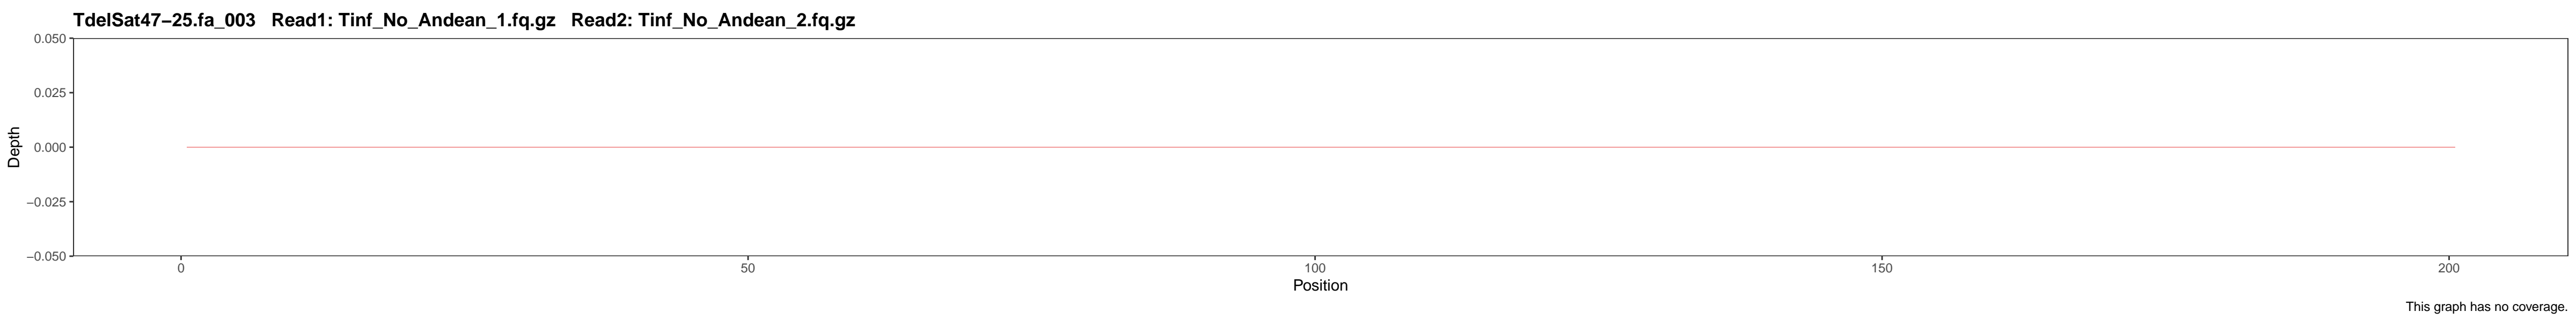

Bases CountMatch CountA CountT CountG CountC

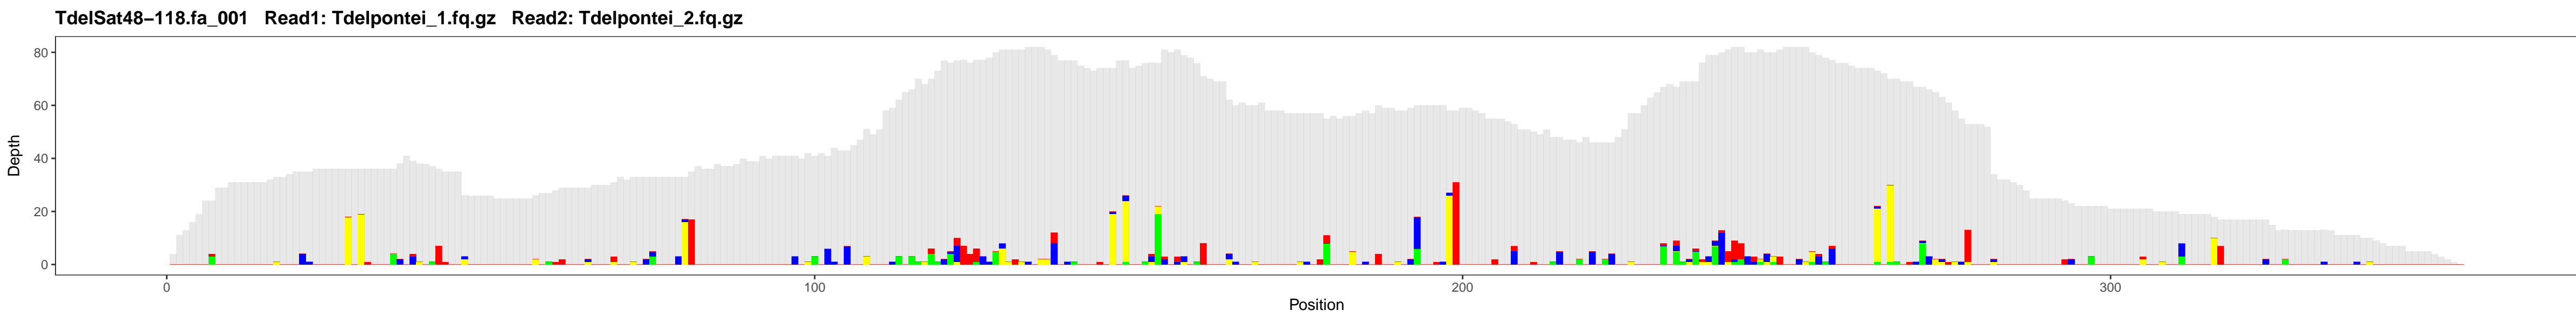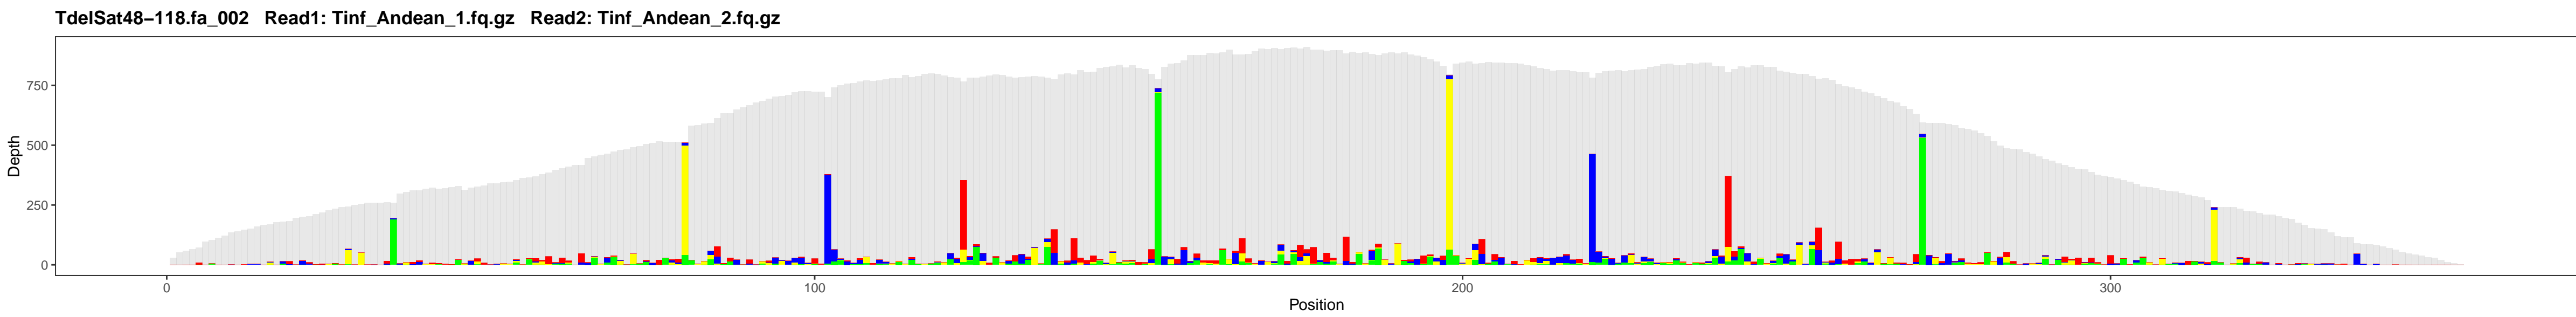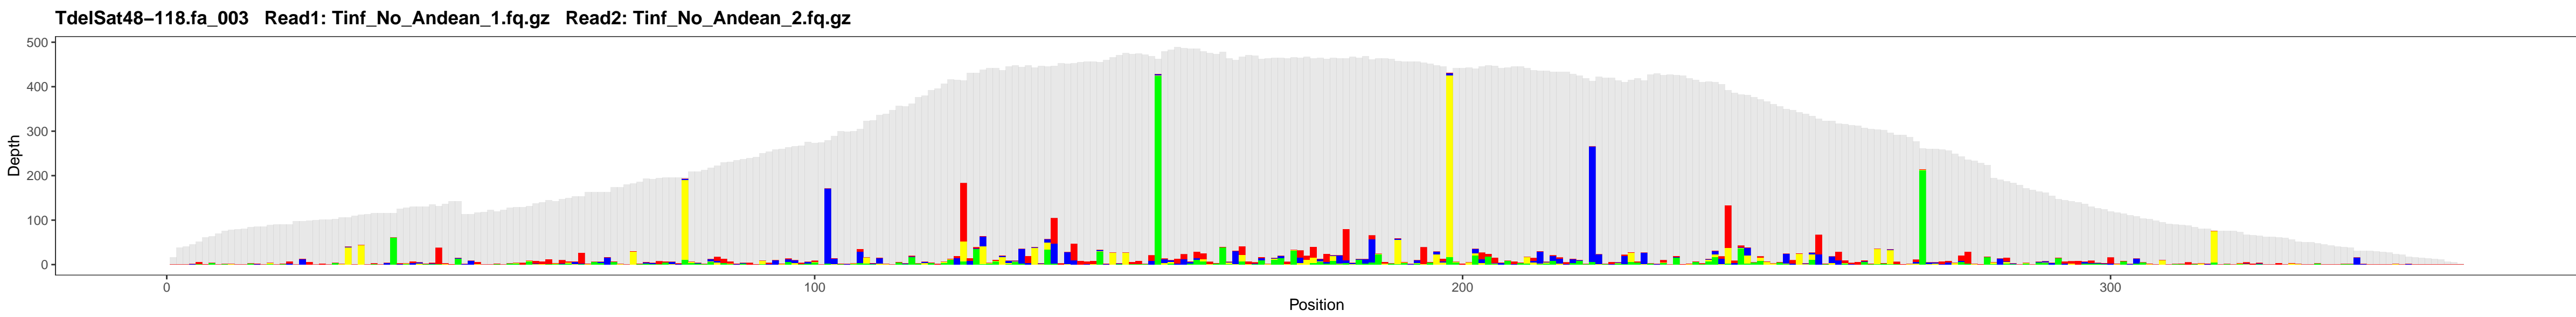

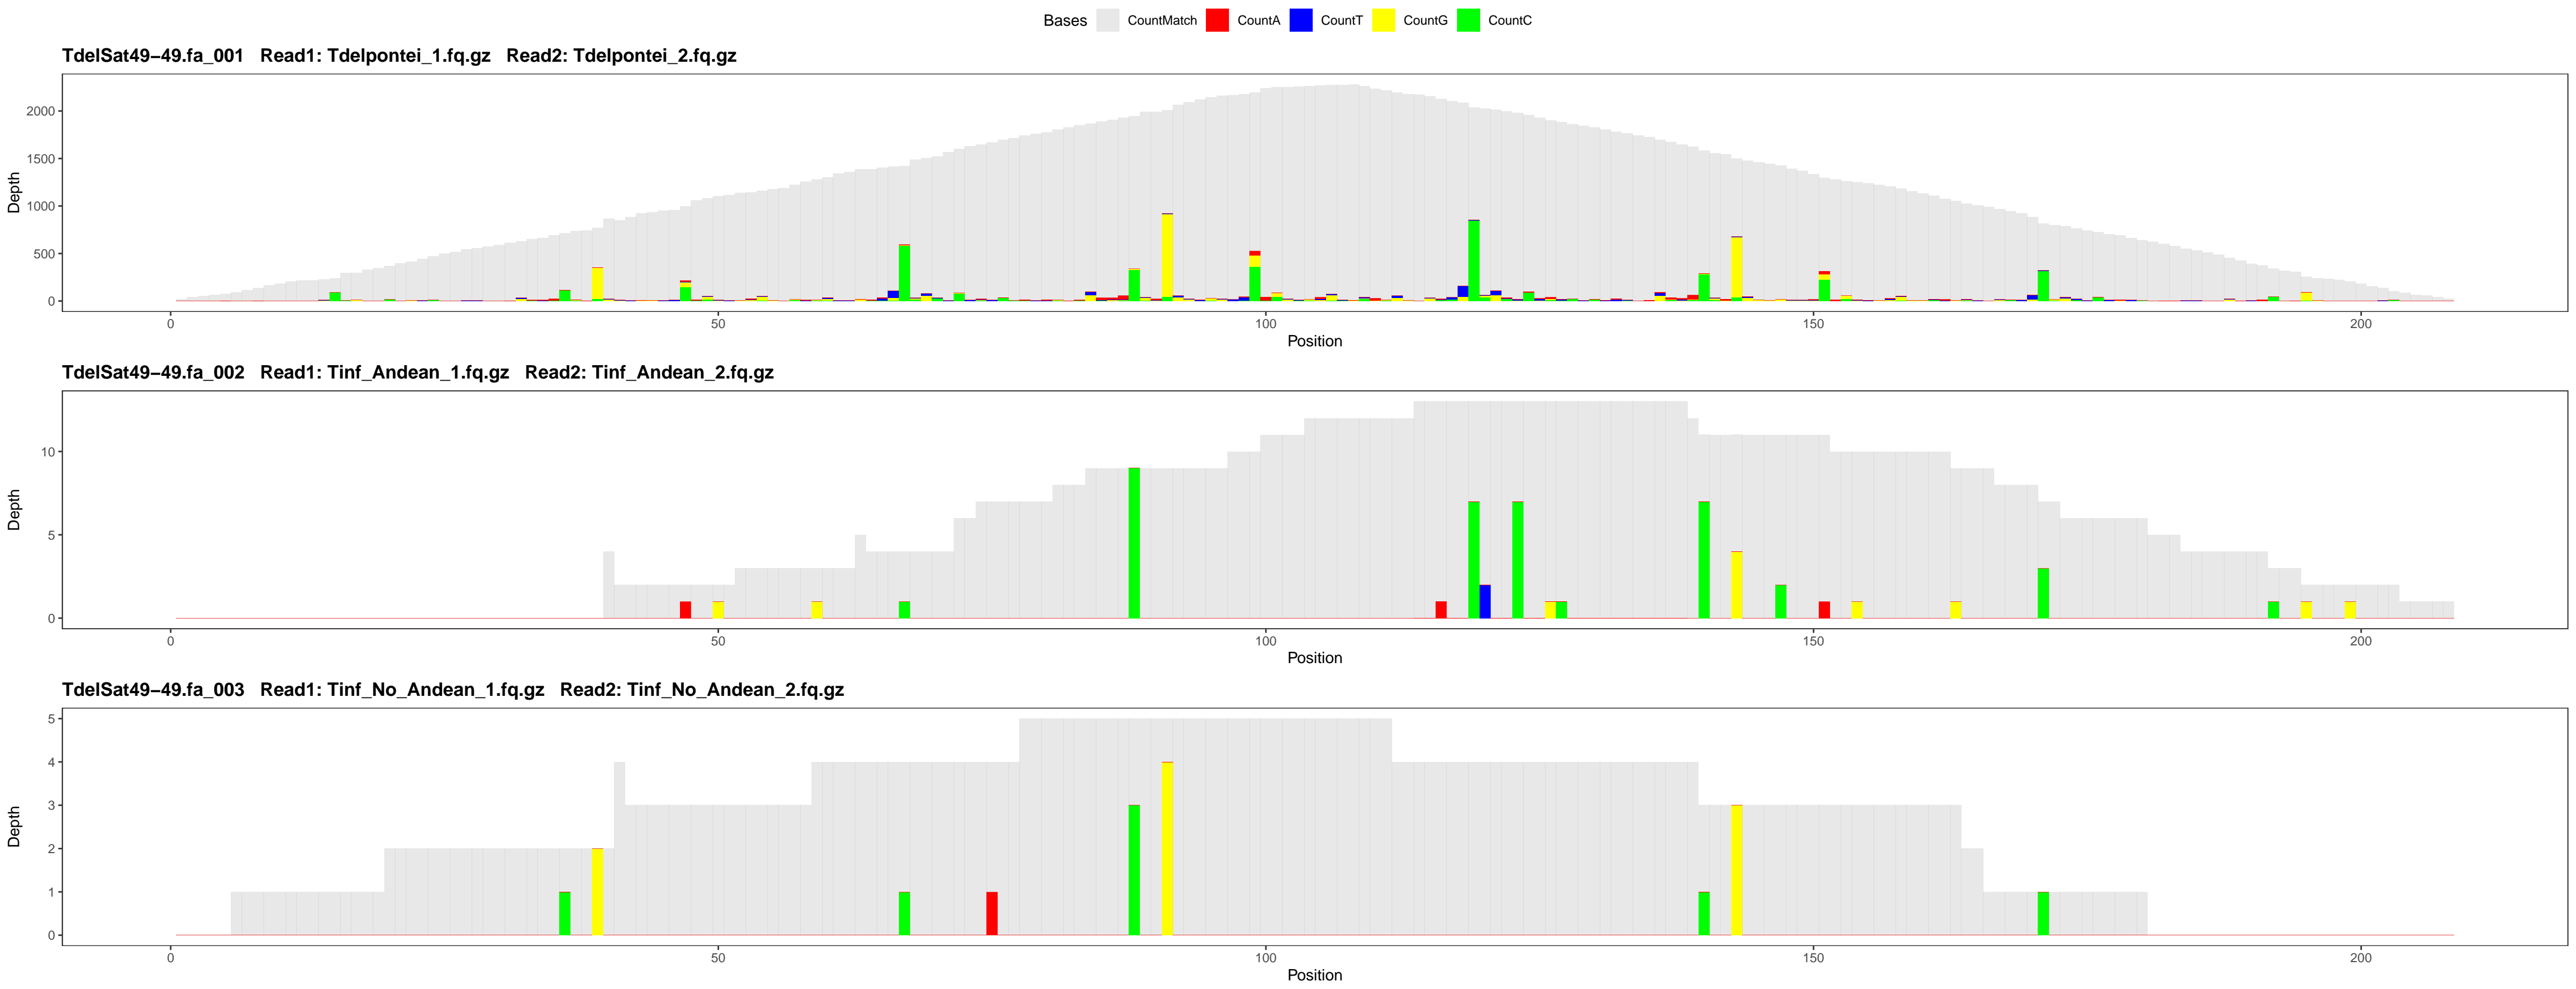

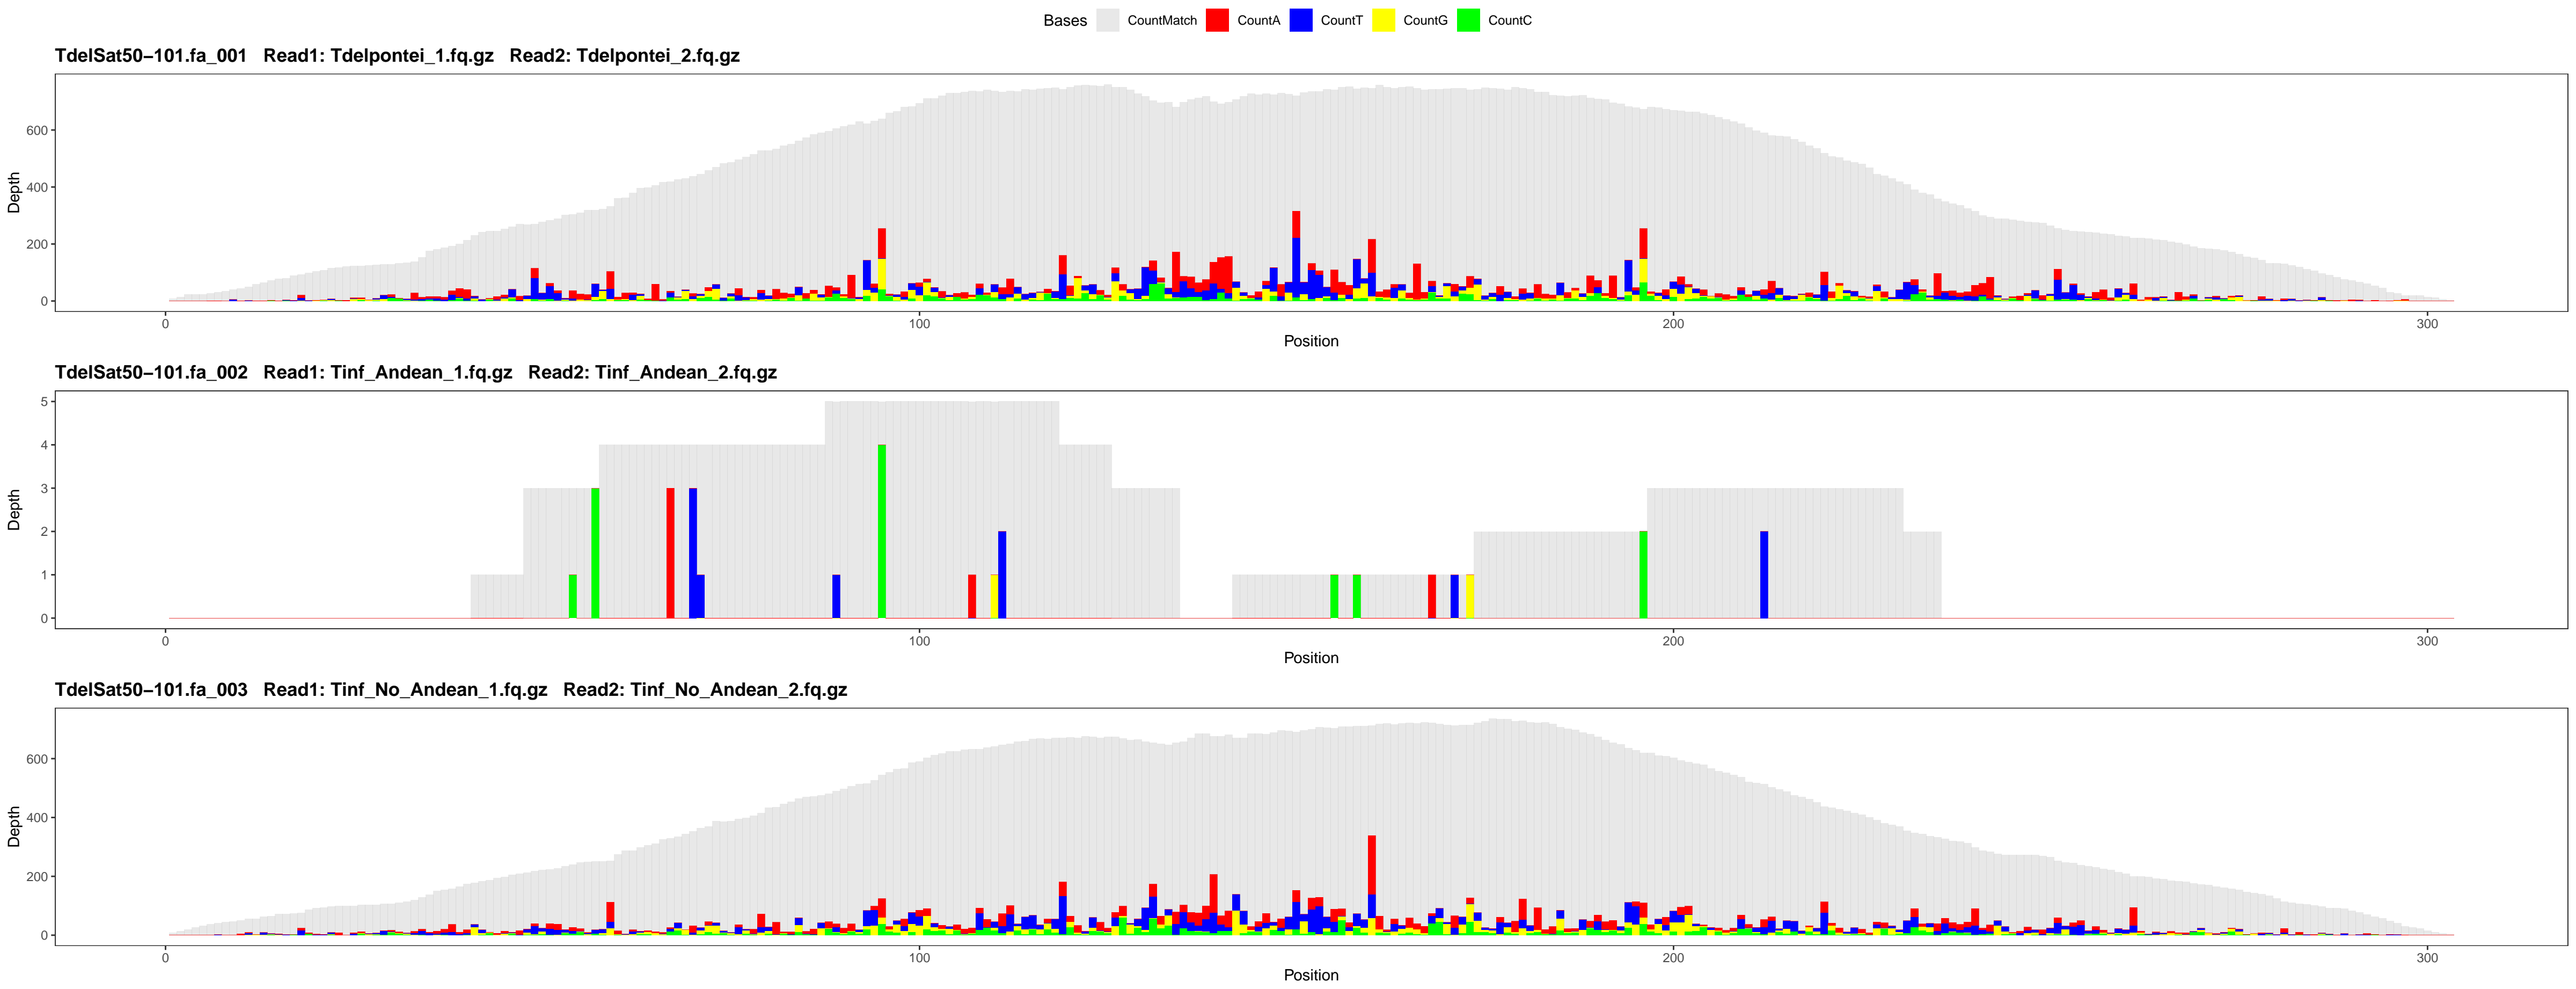

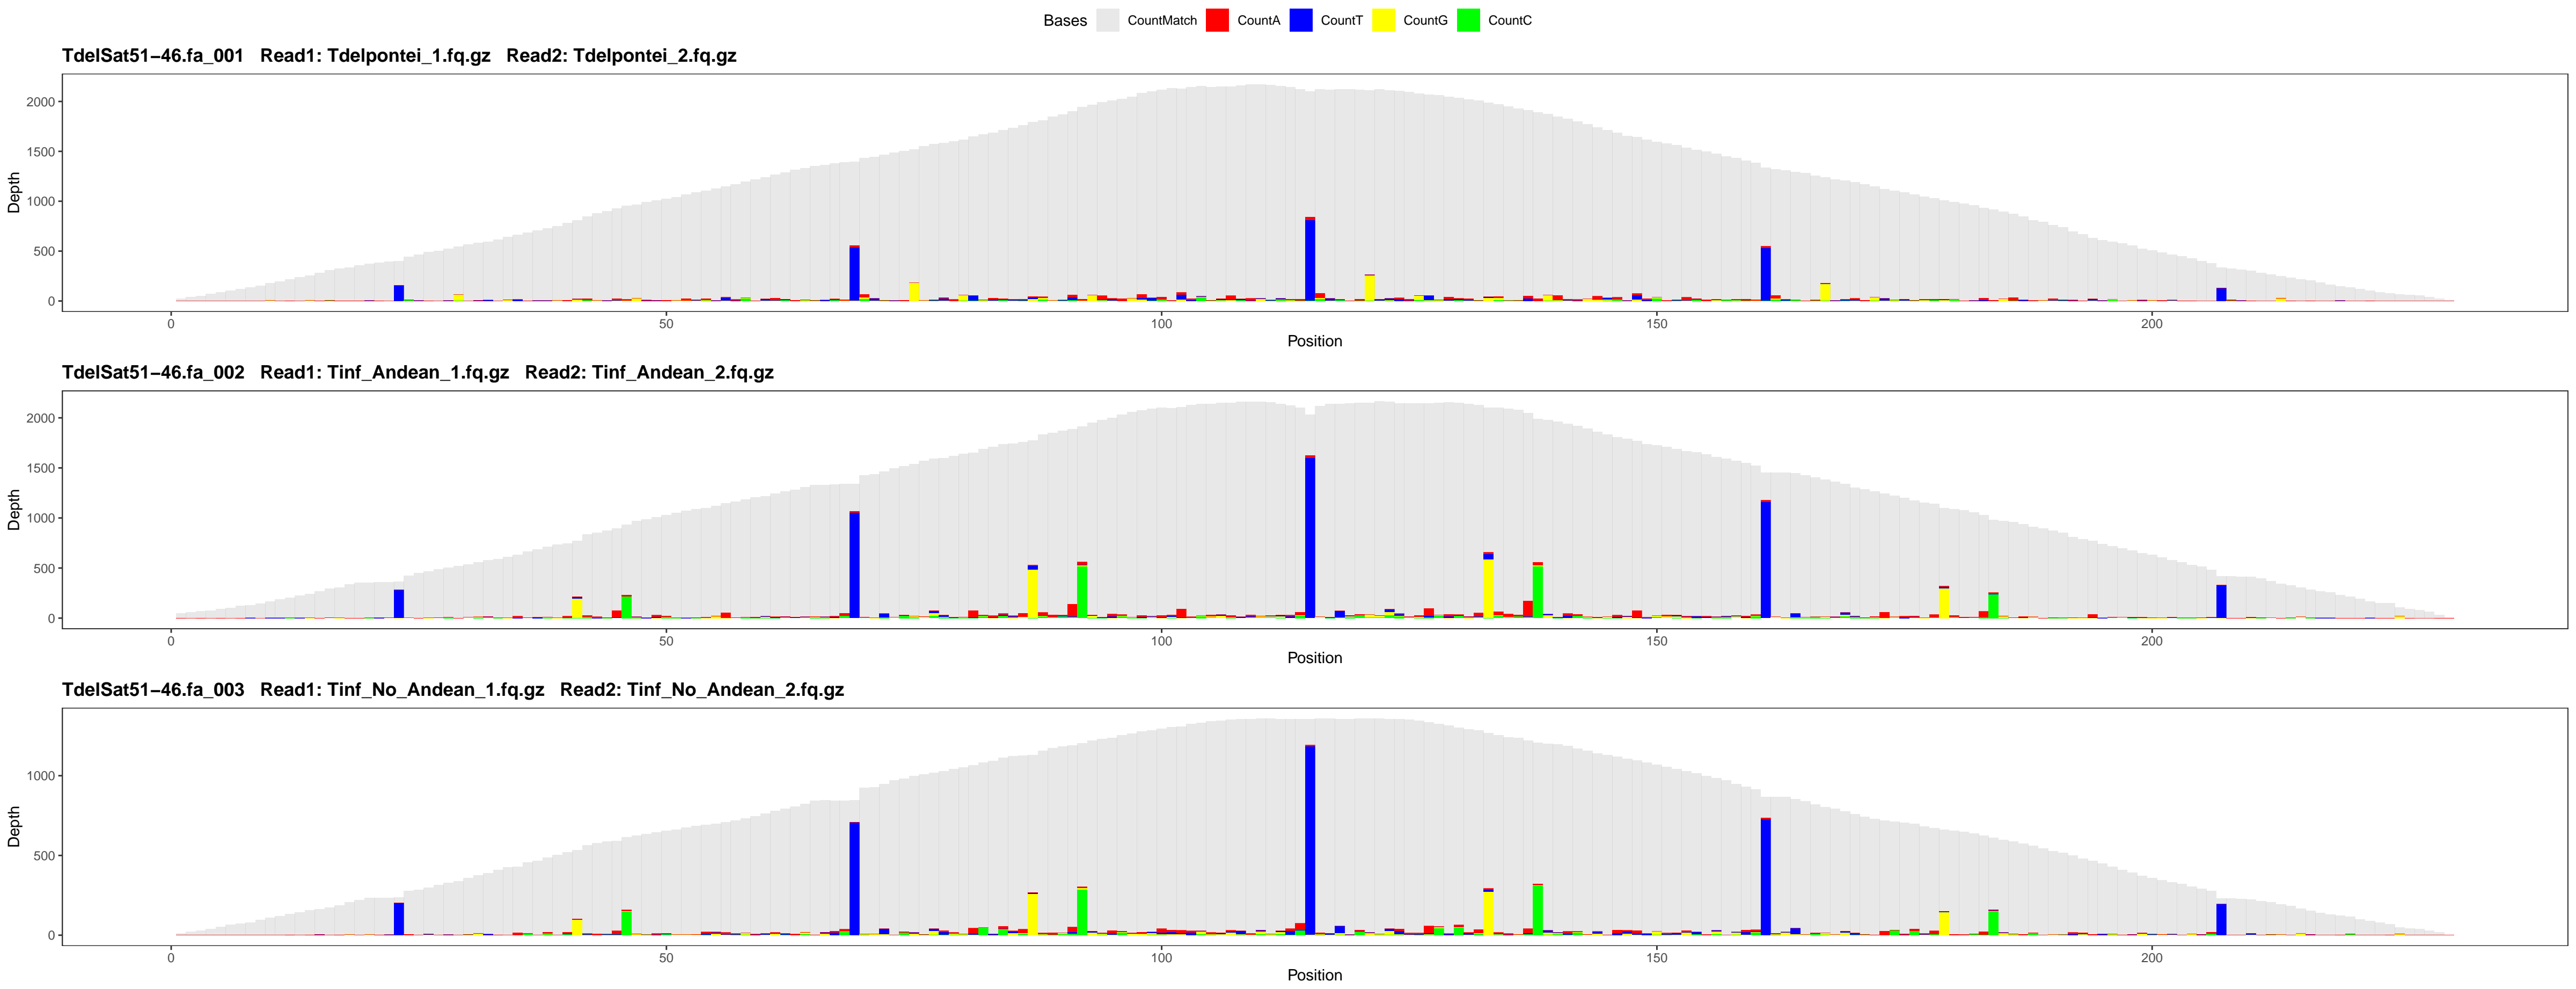

Bases CountMatch CountA CountT CountG CountC

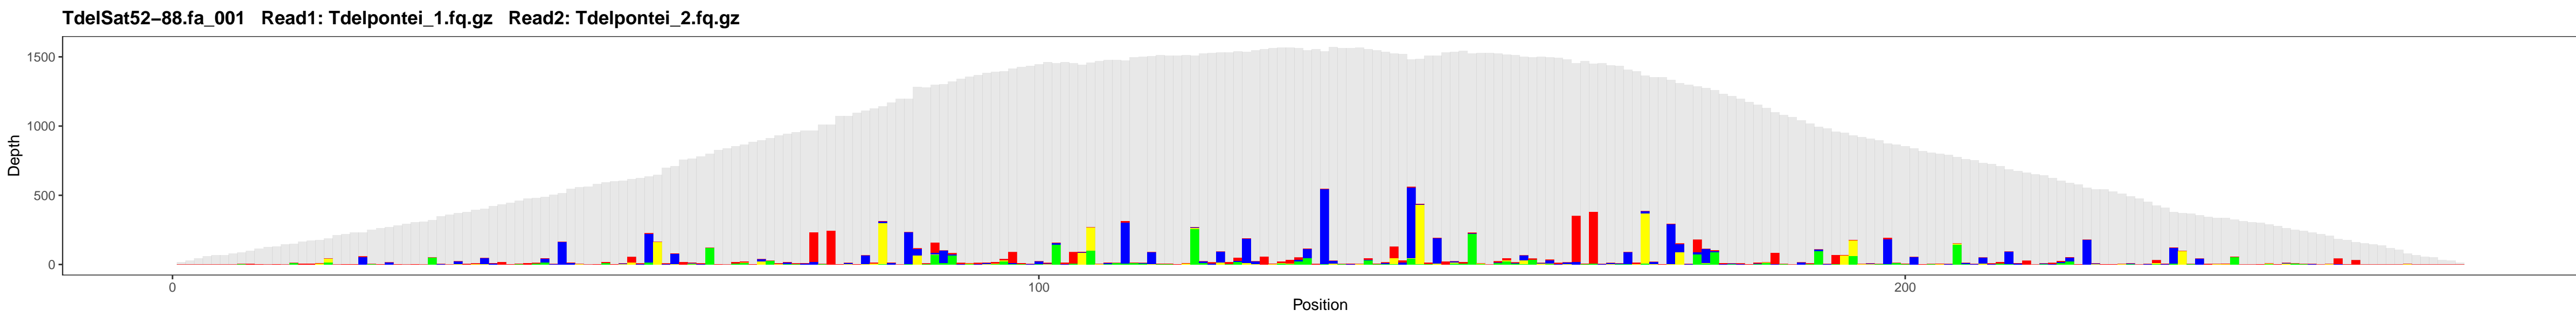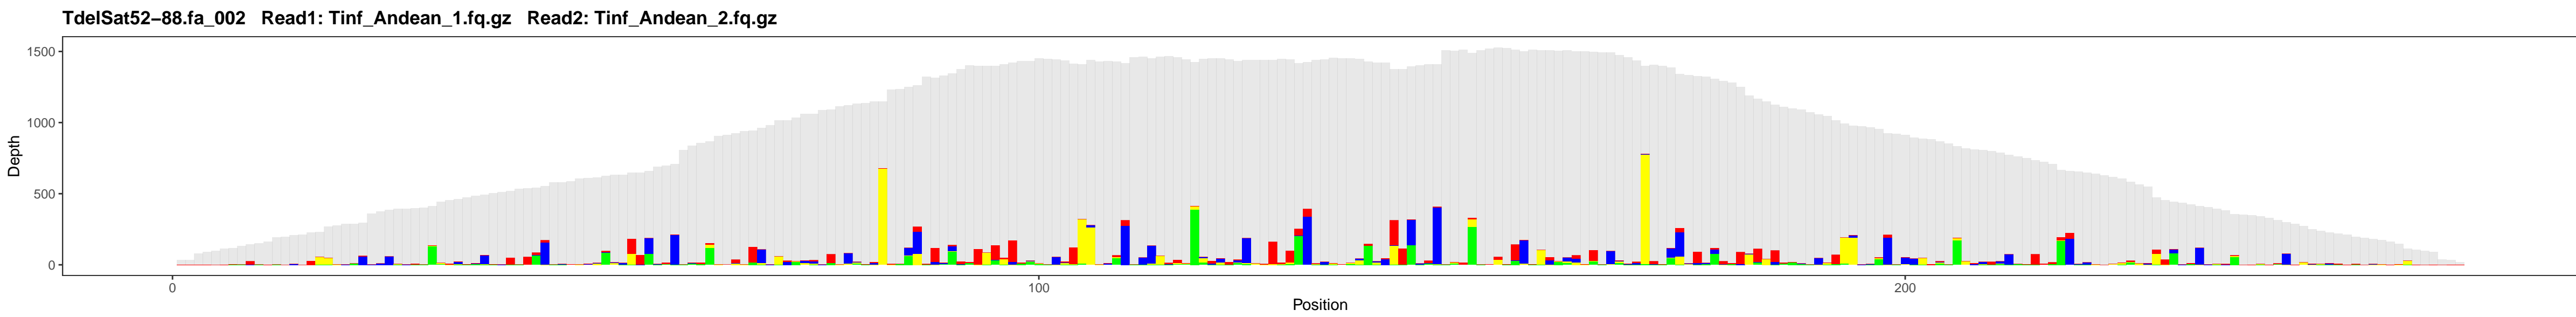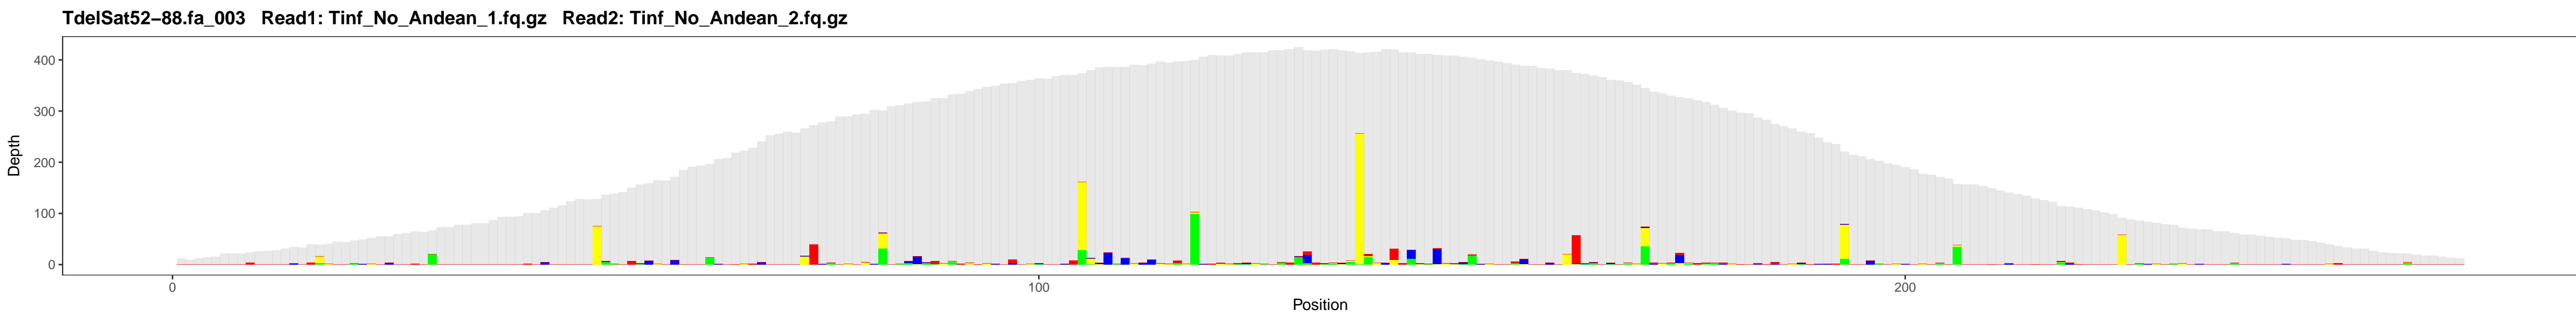

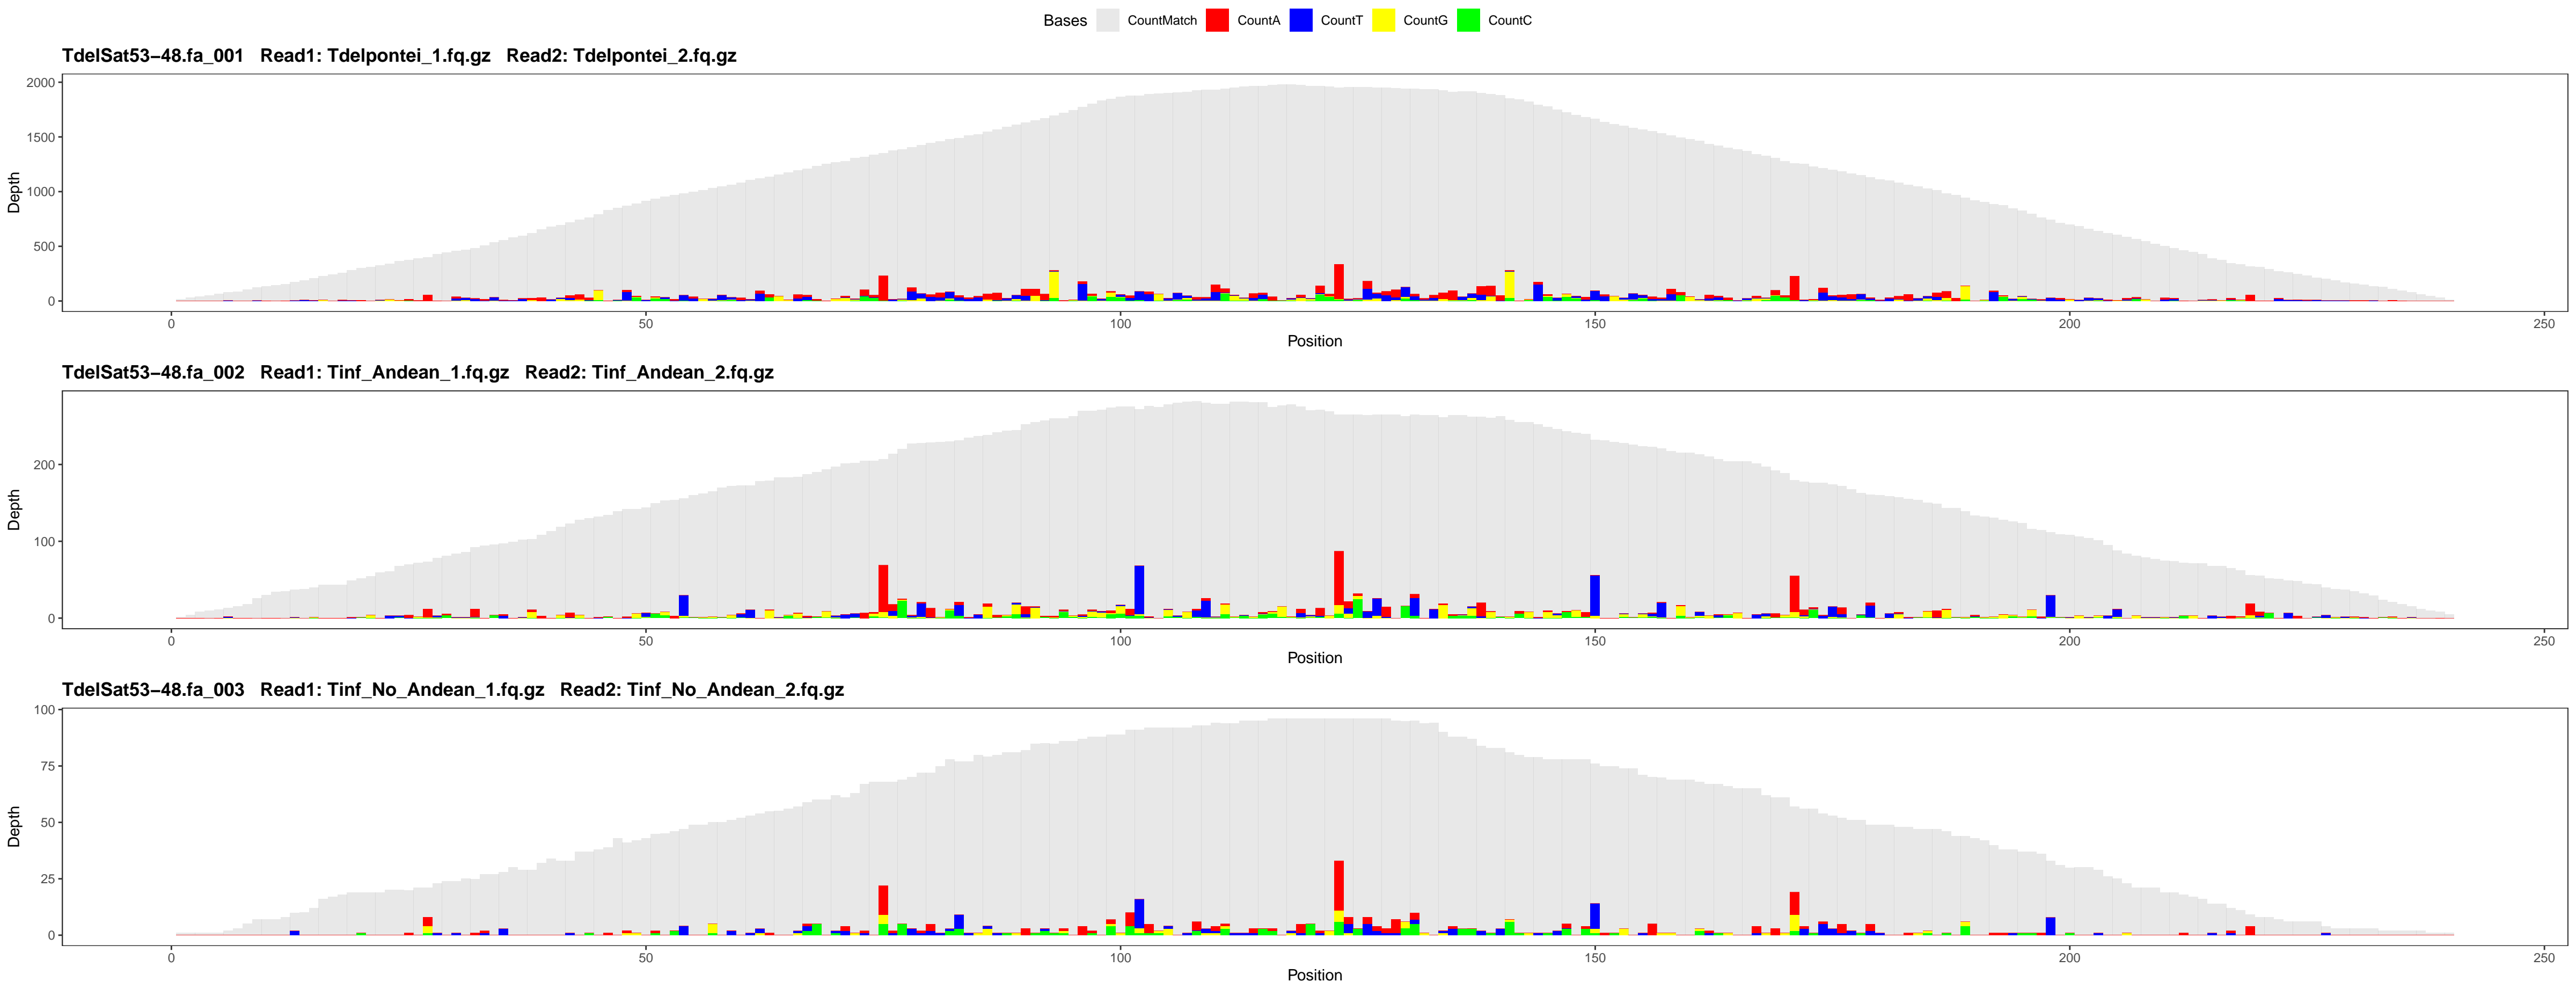

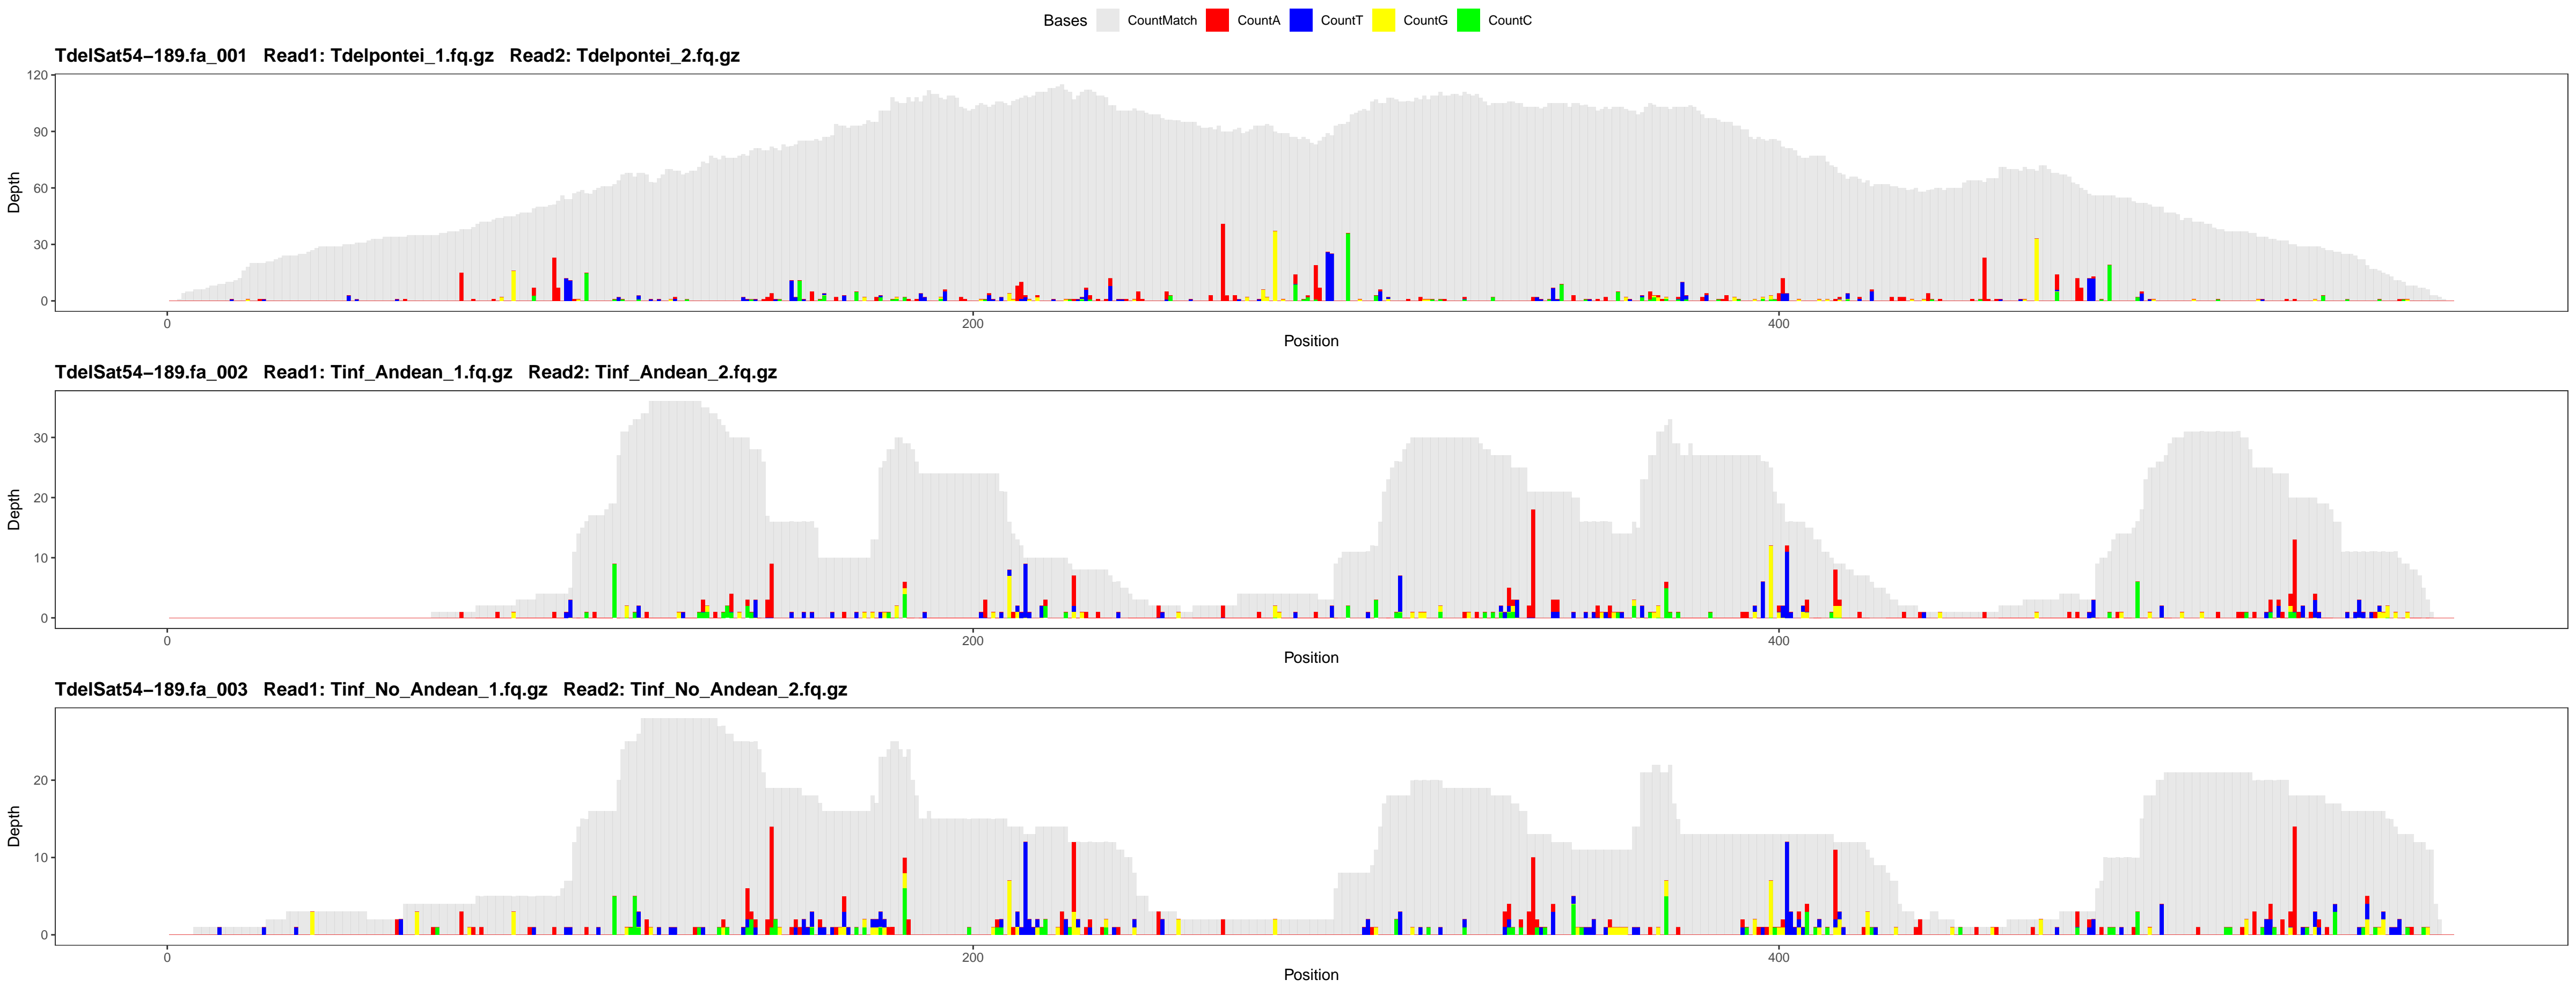



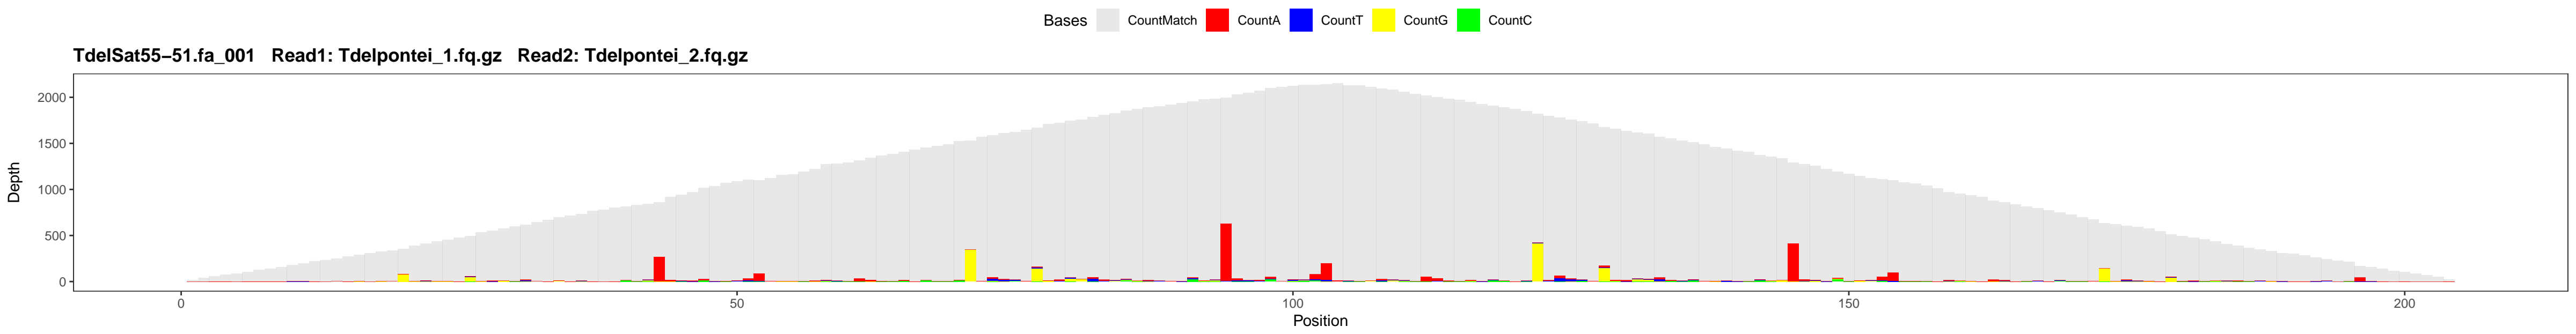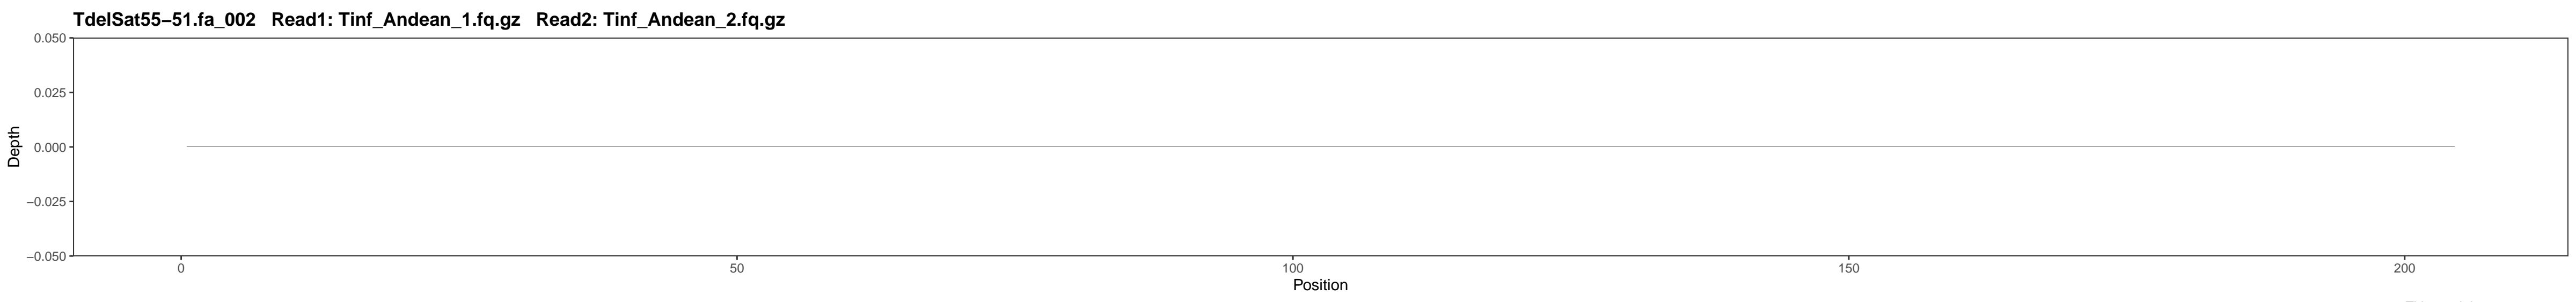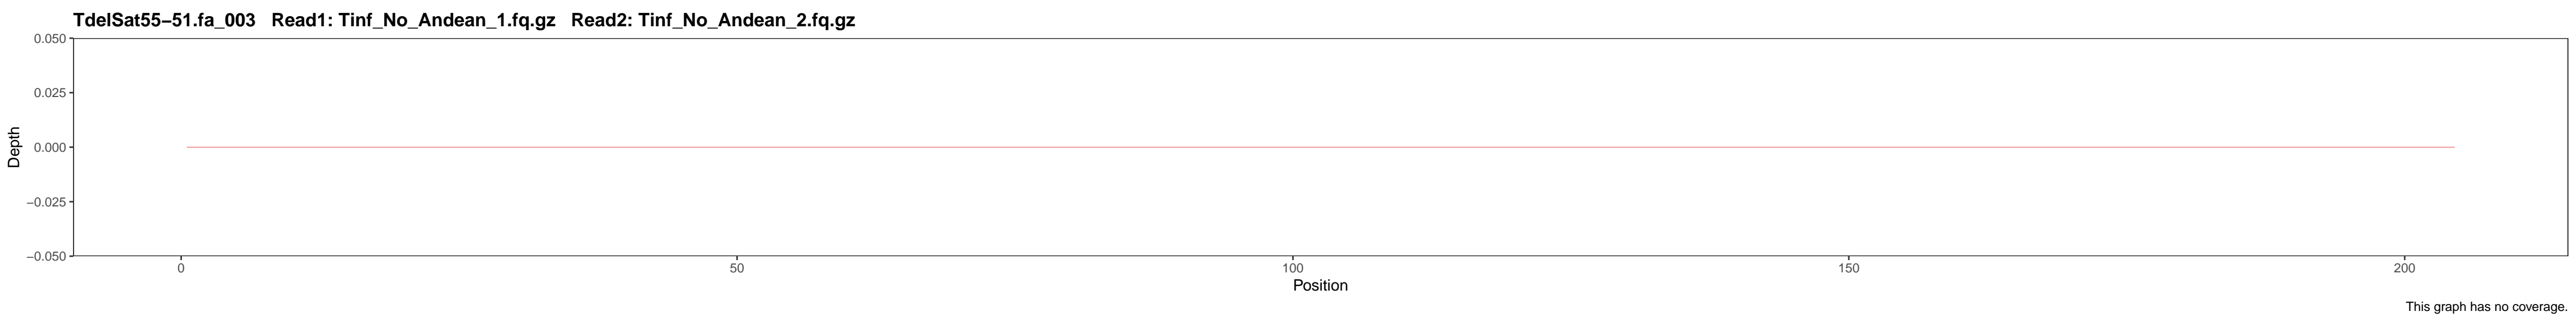

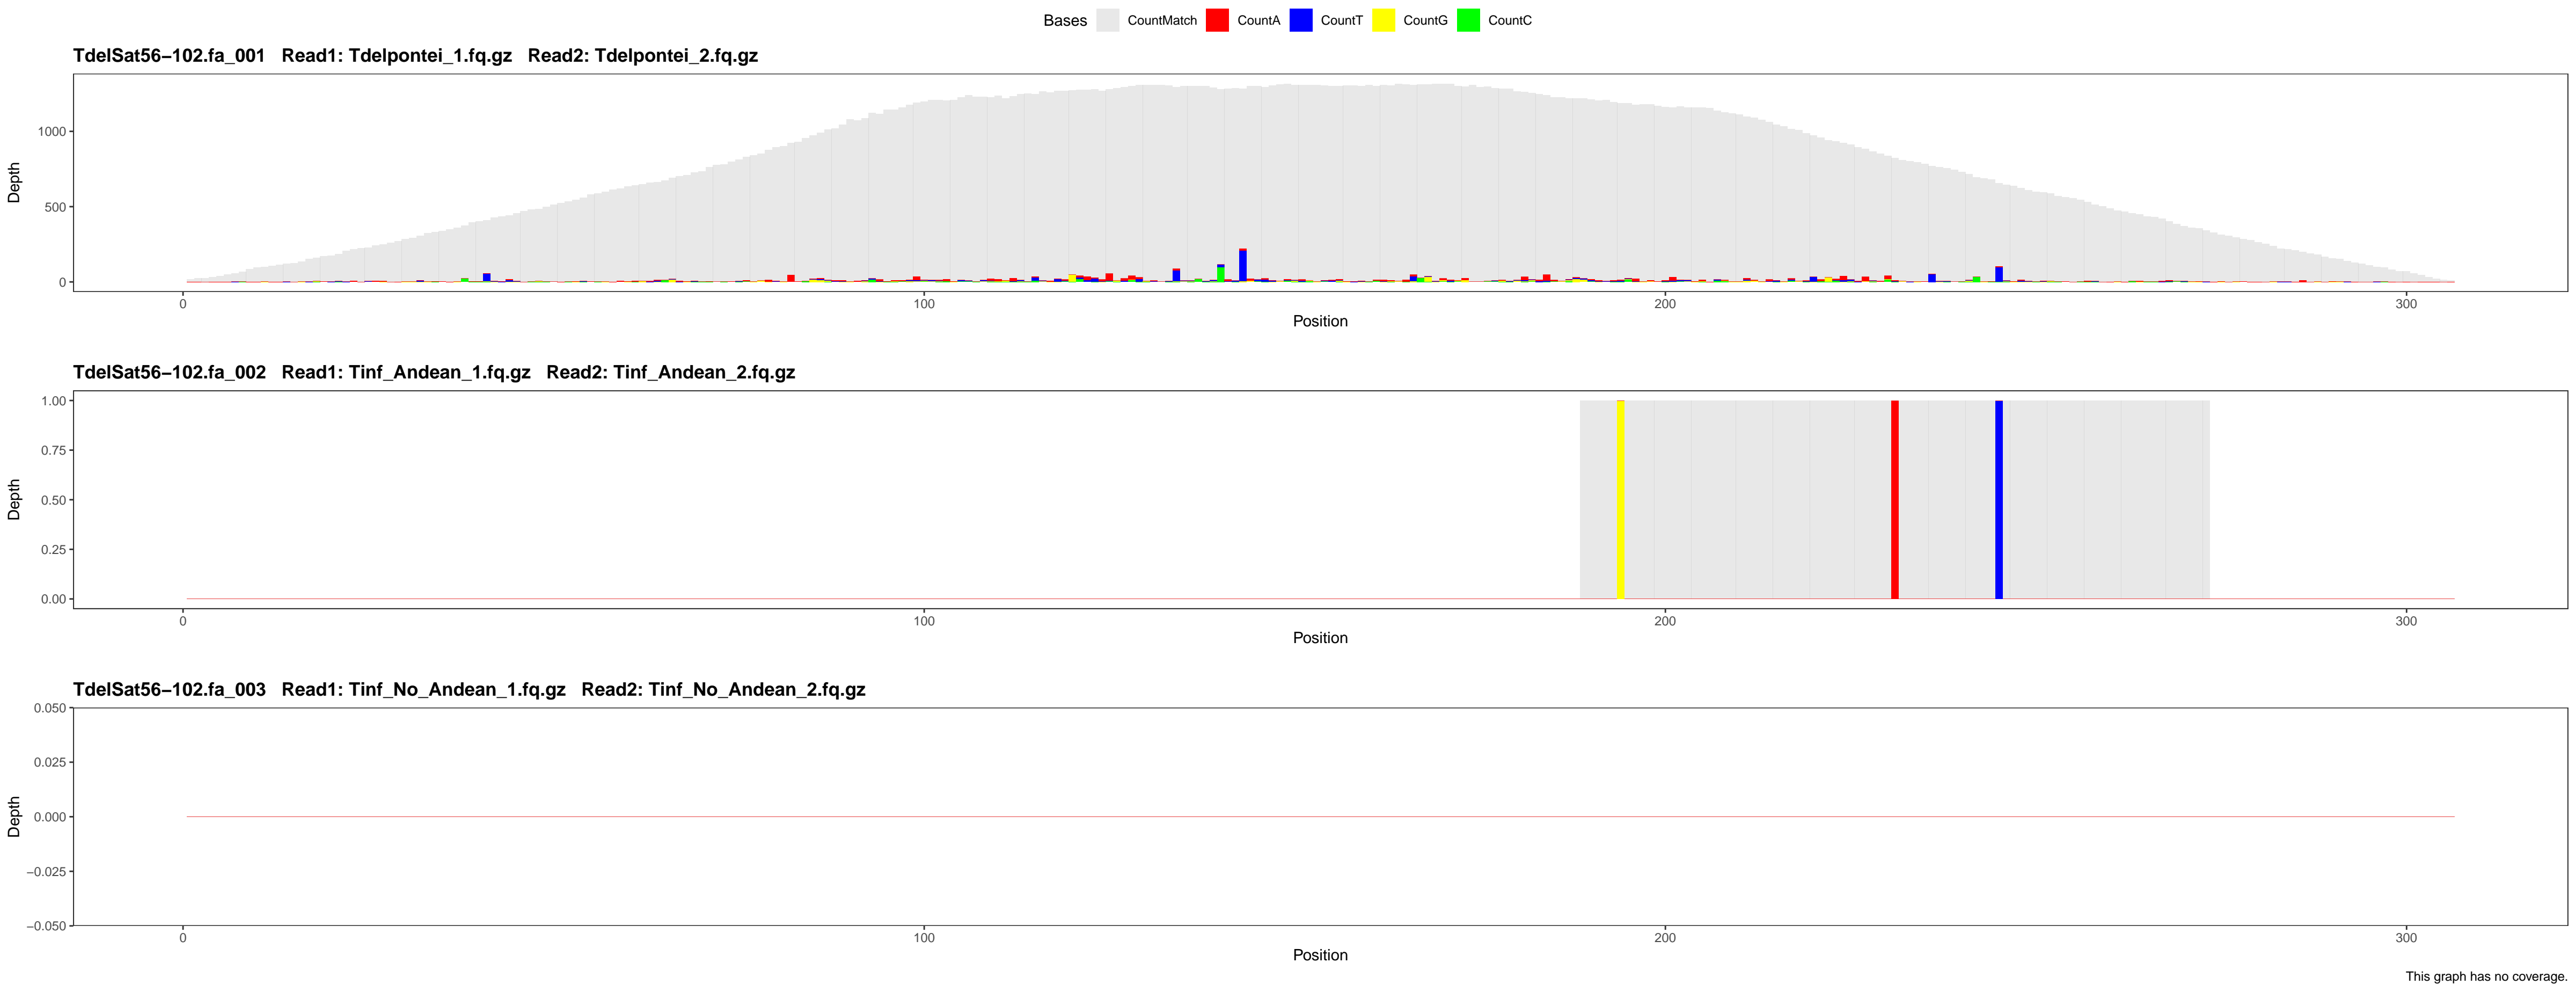

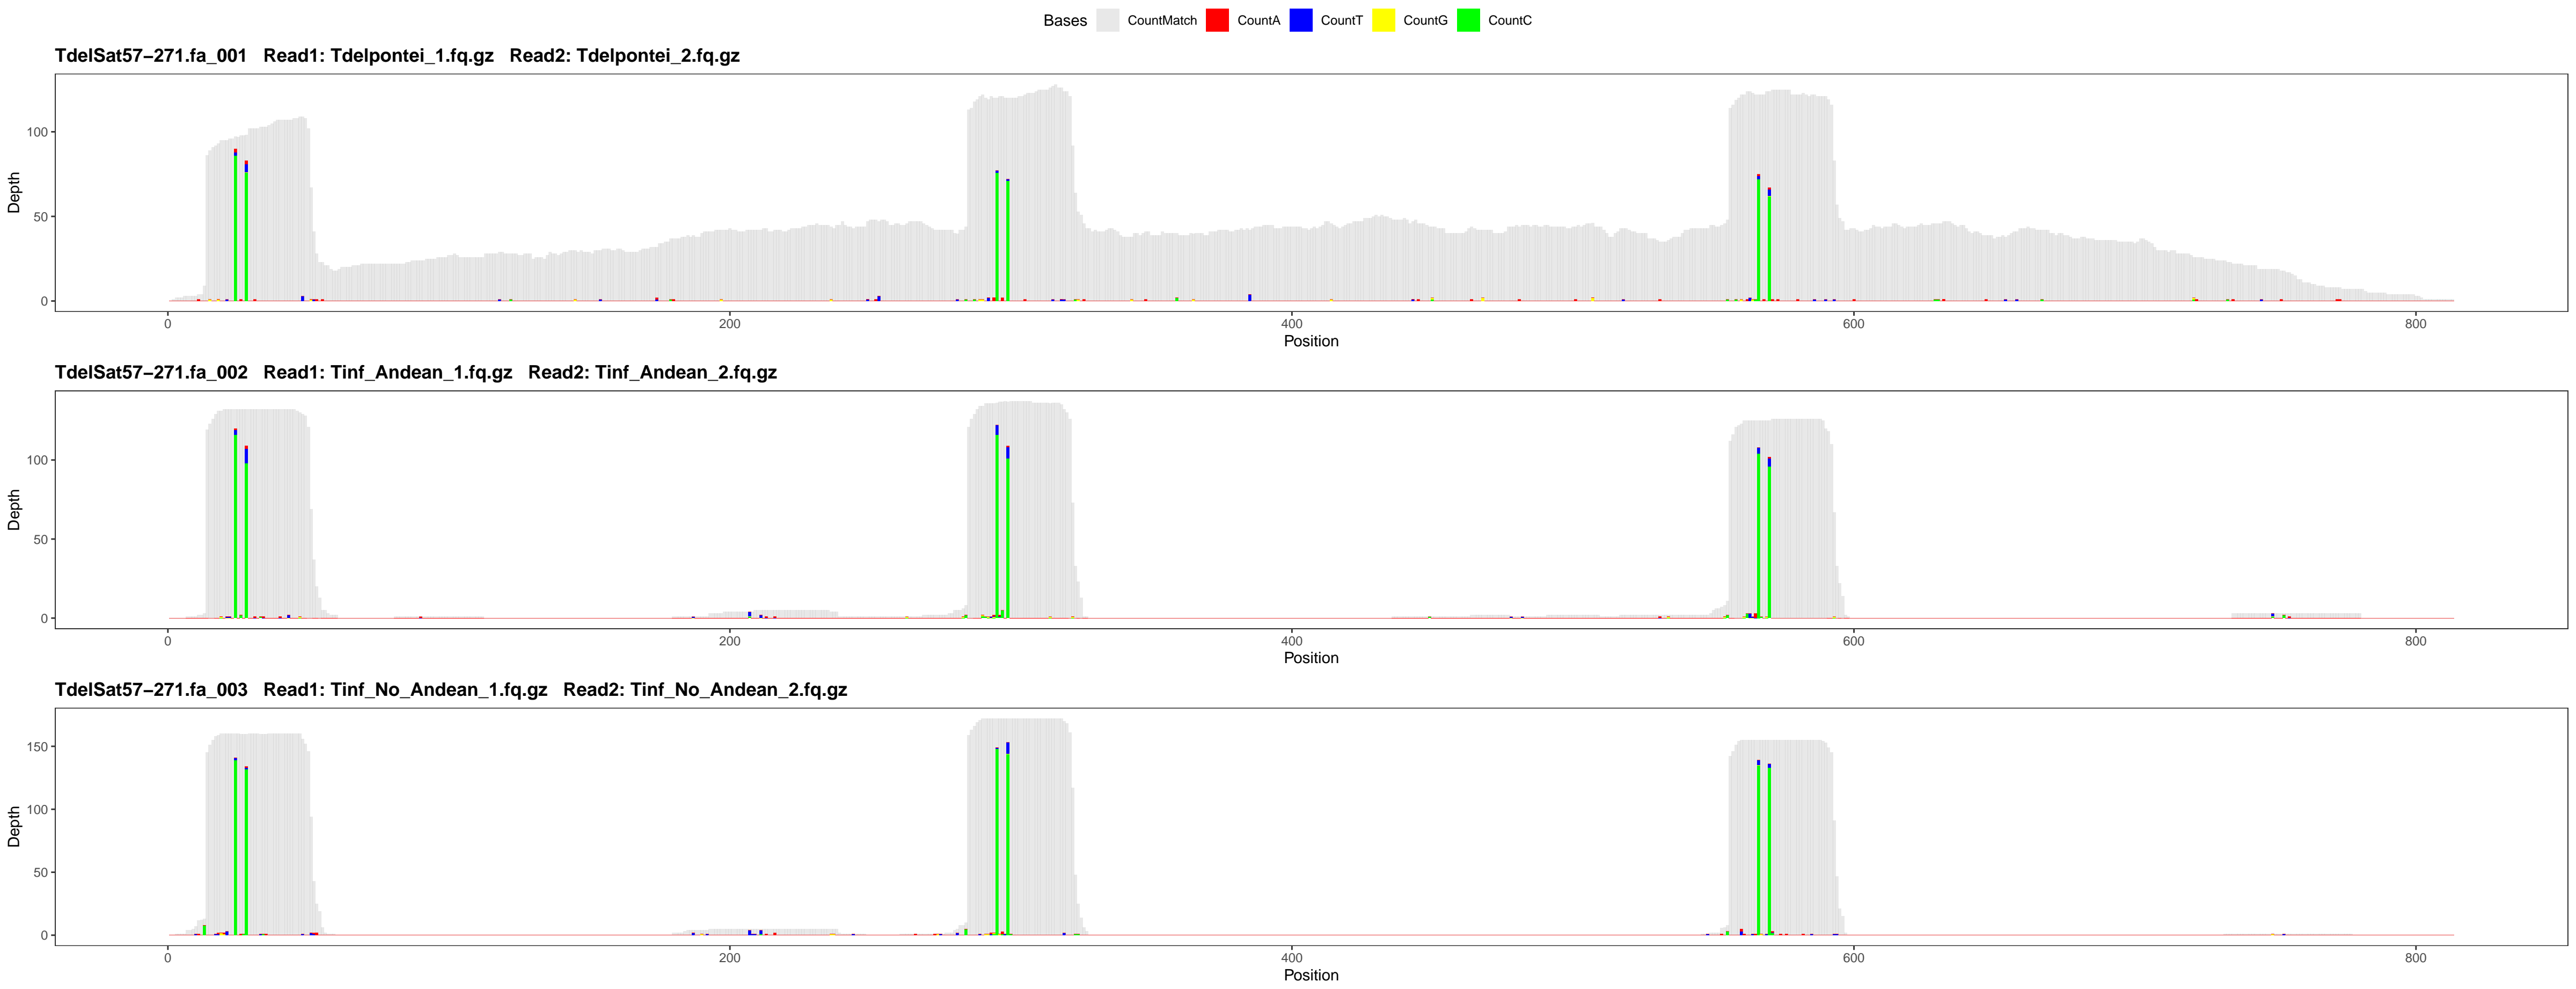

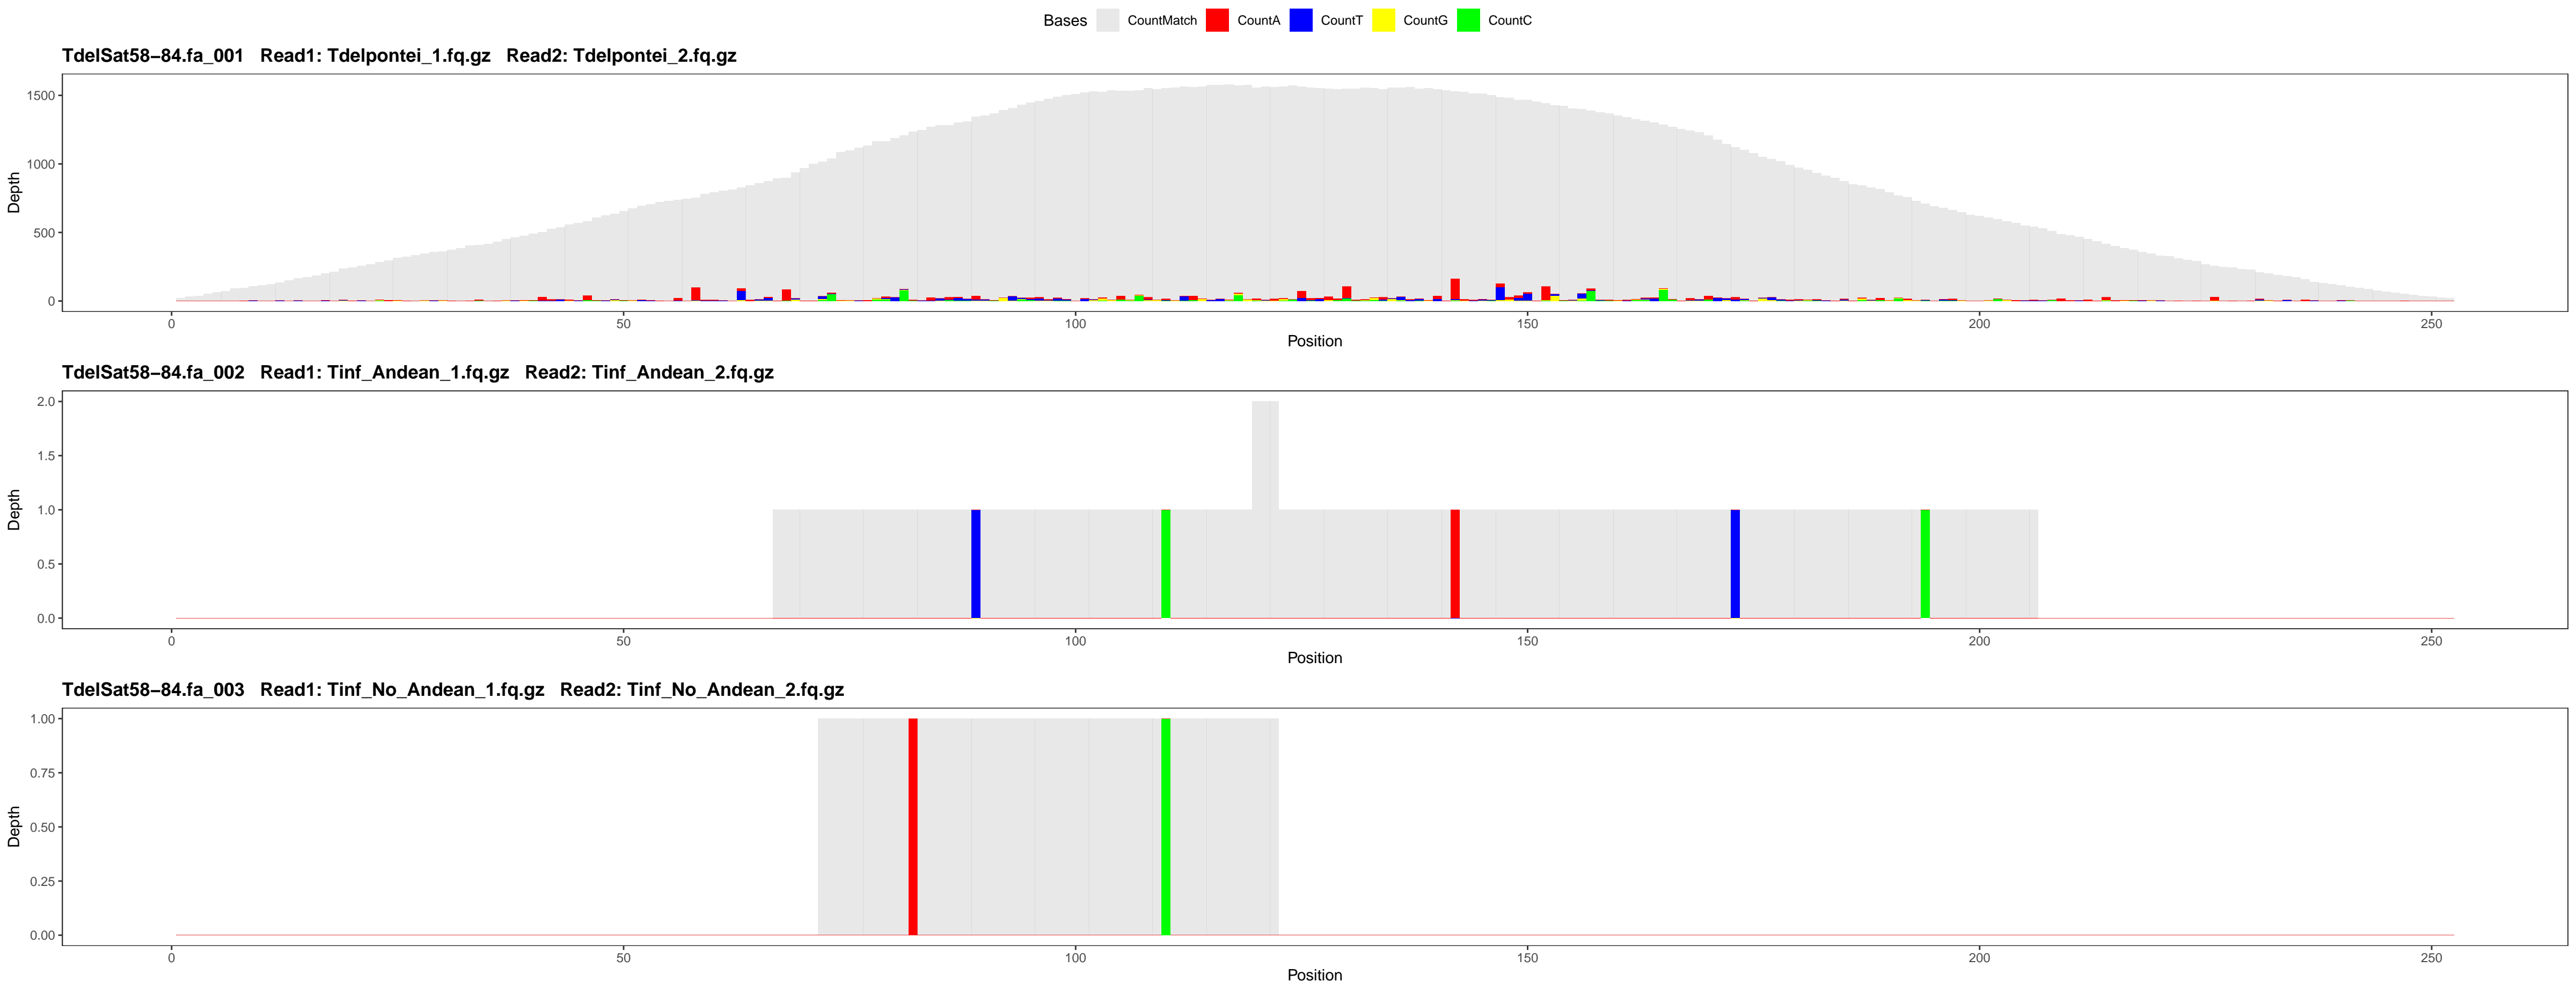

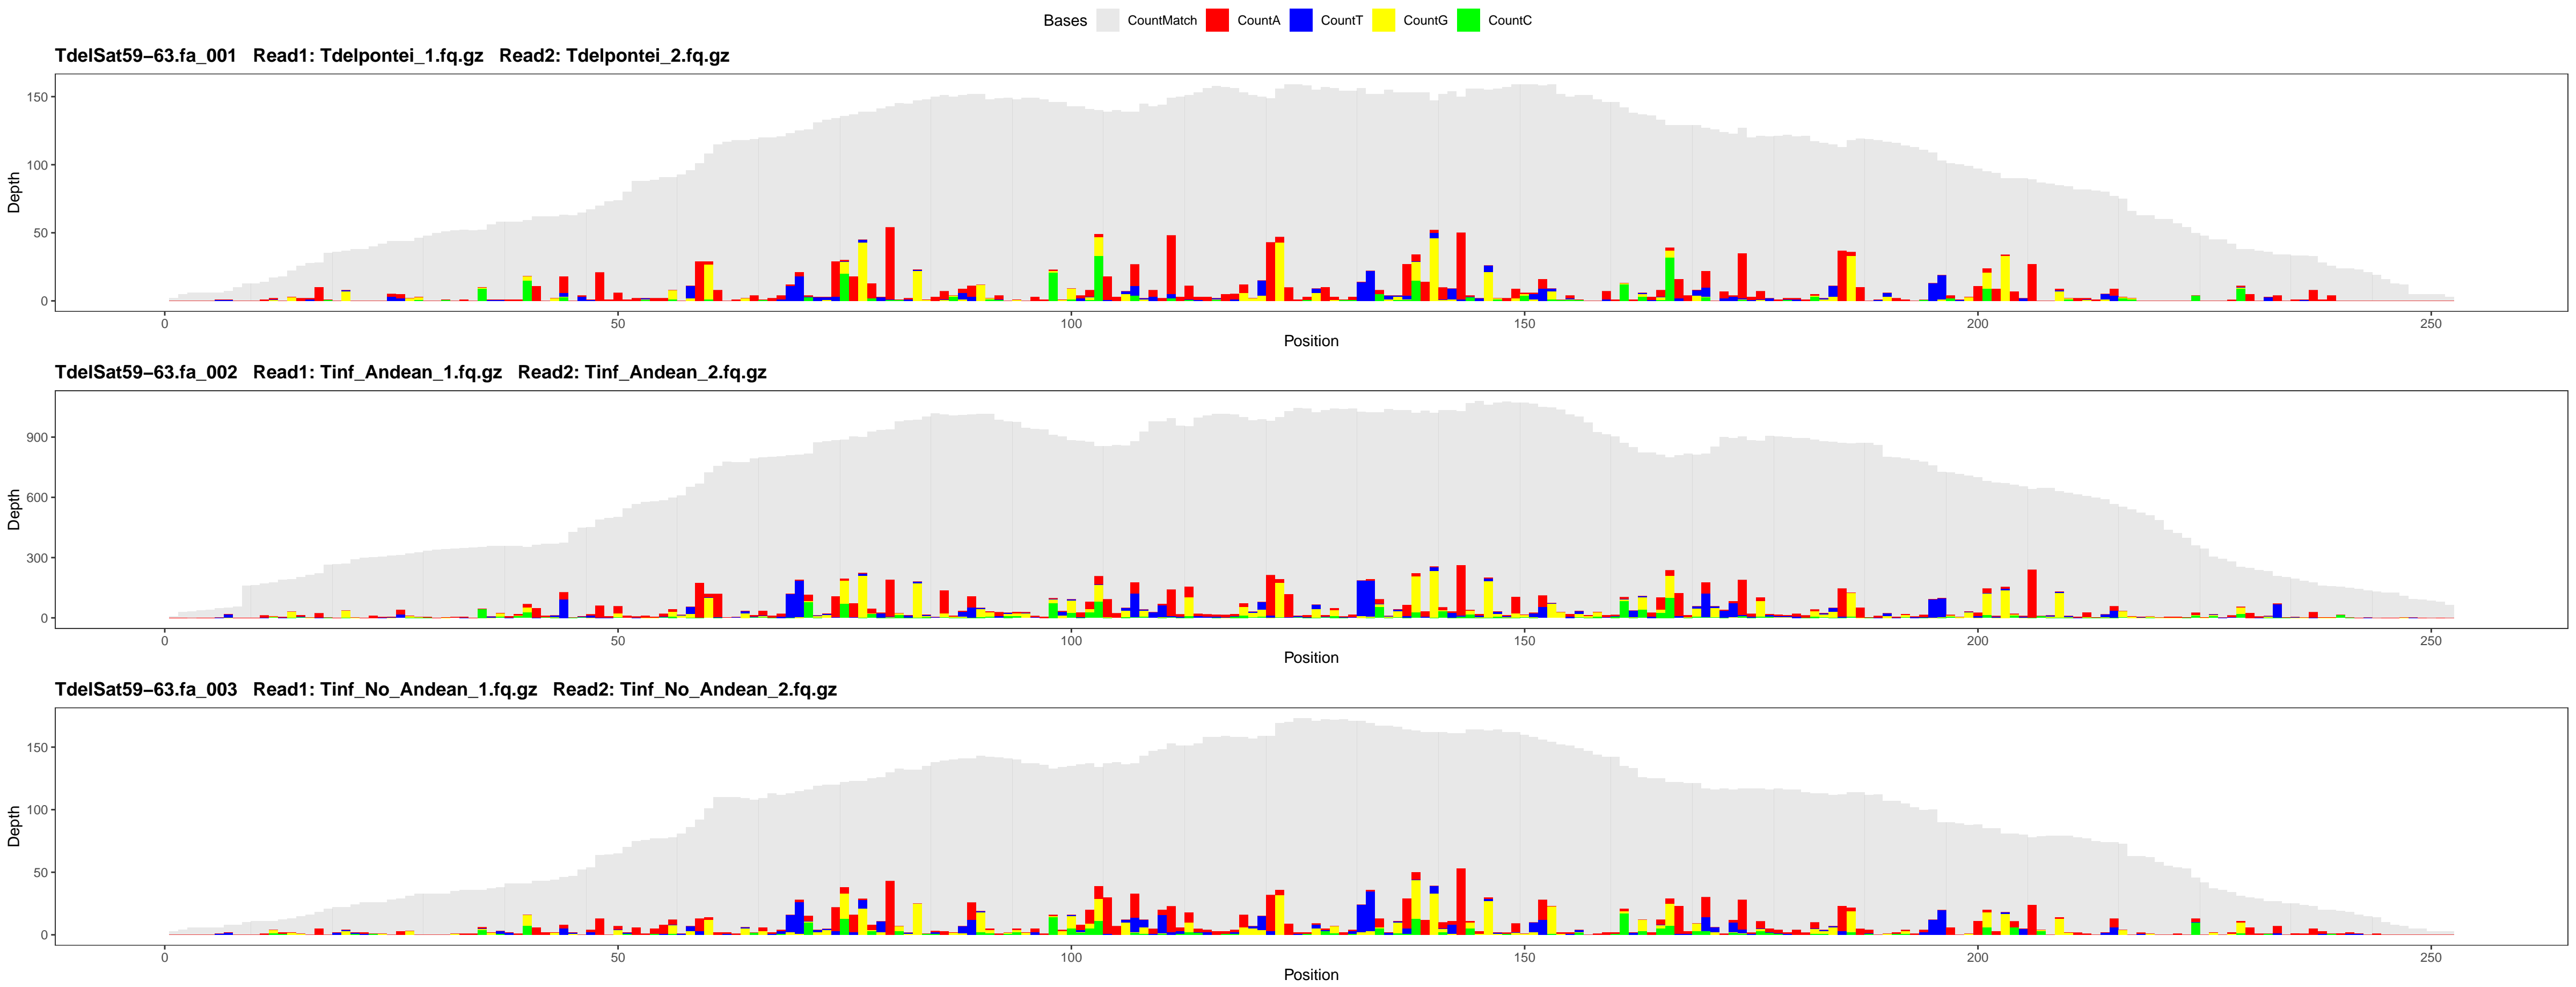

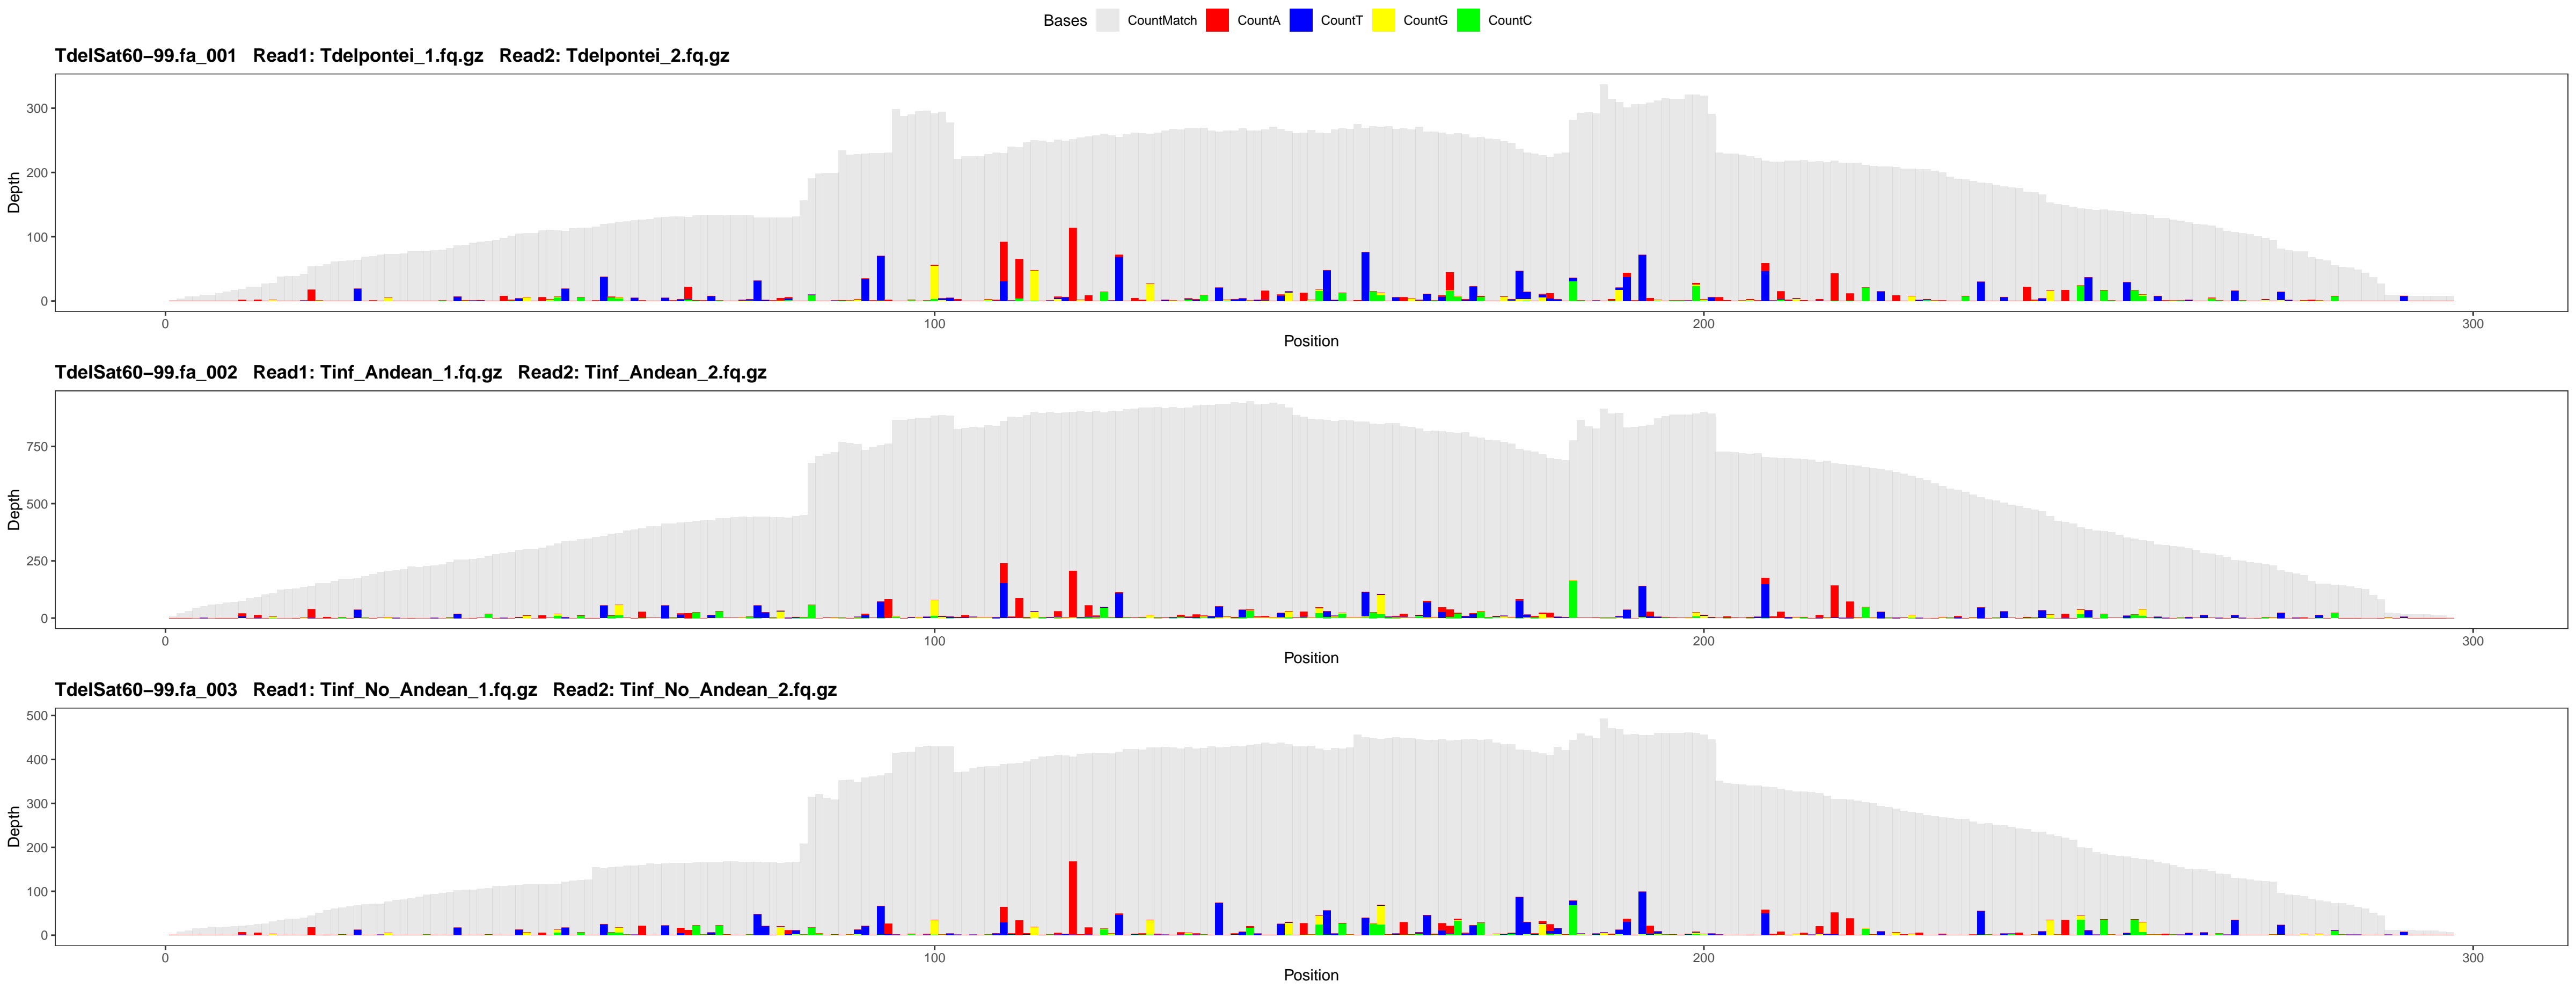

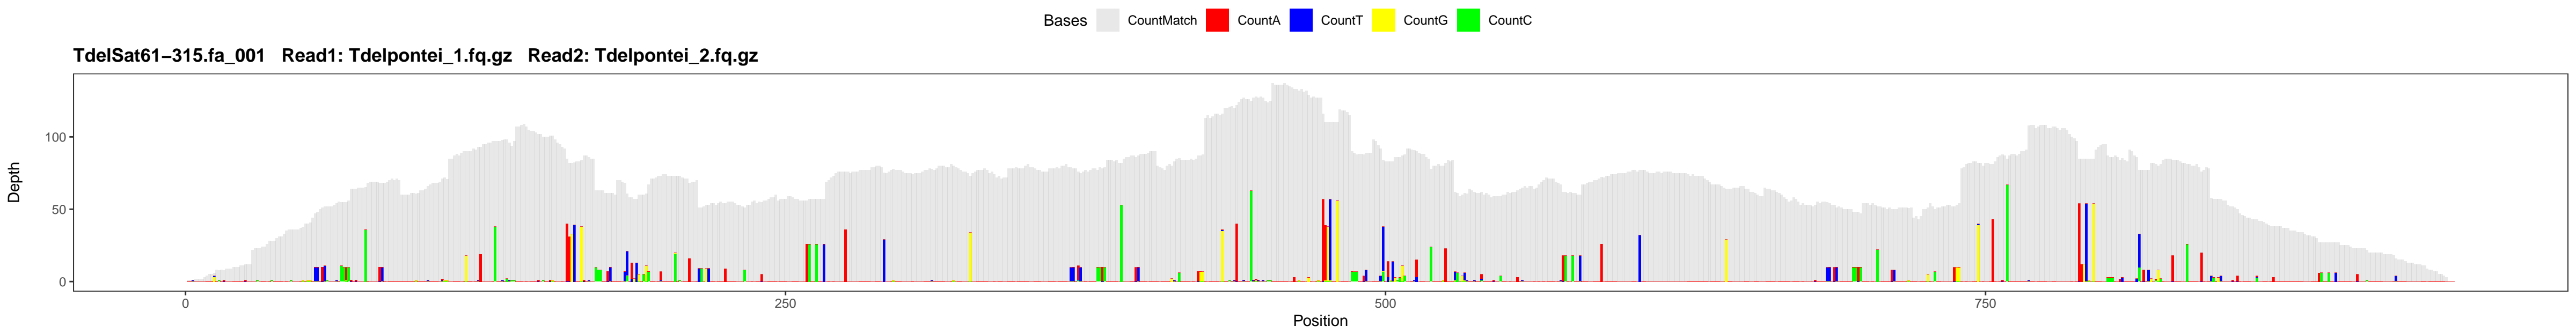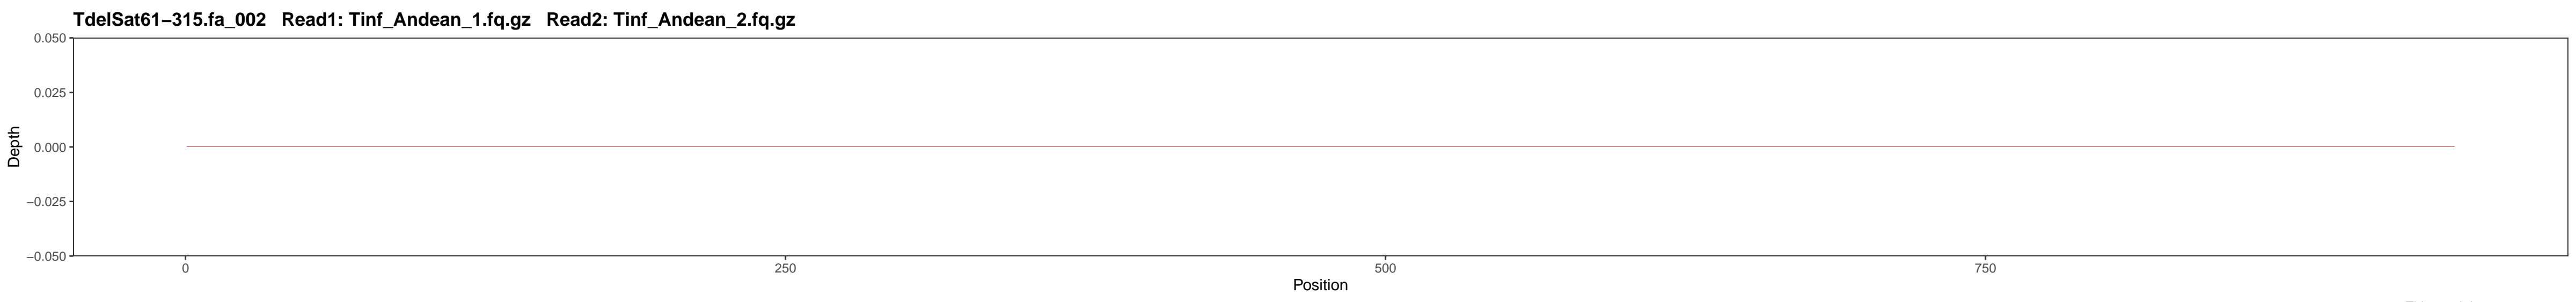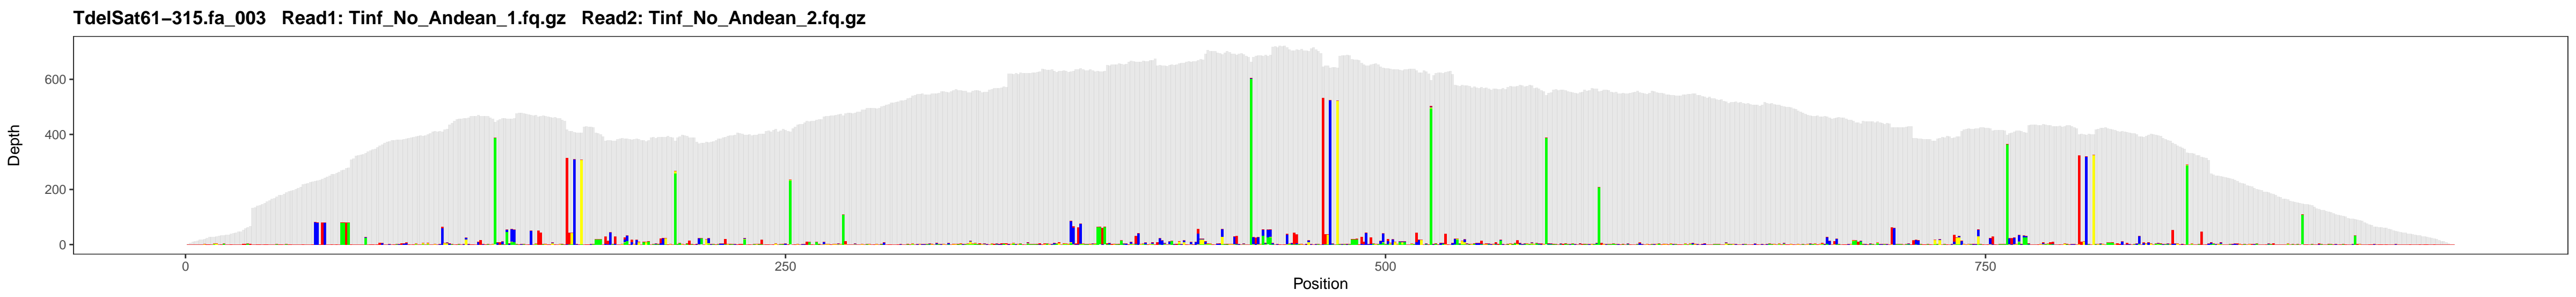

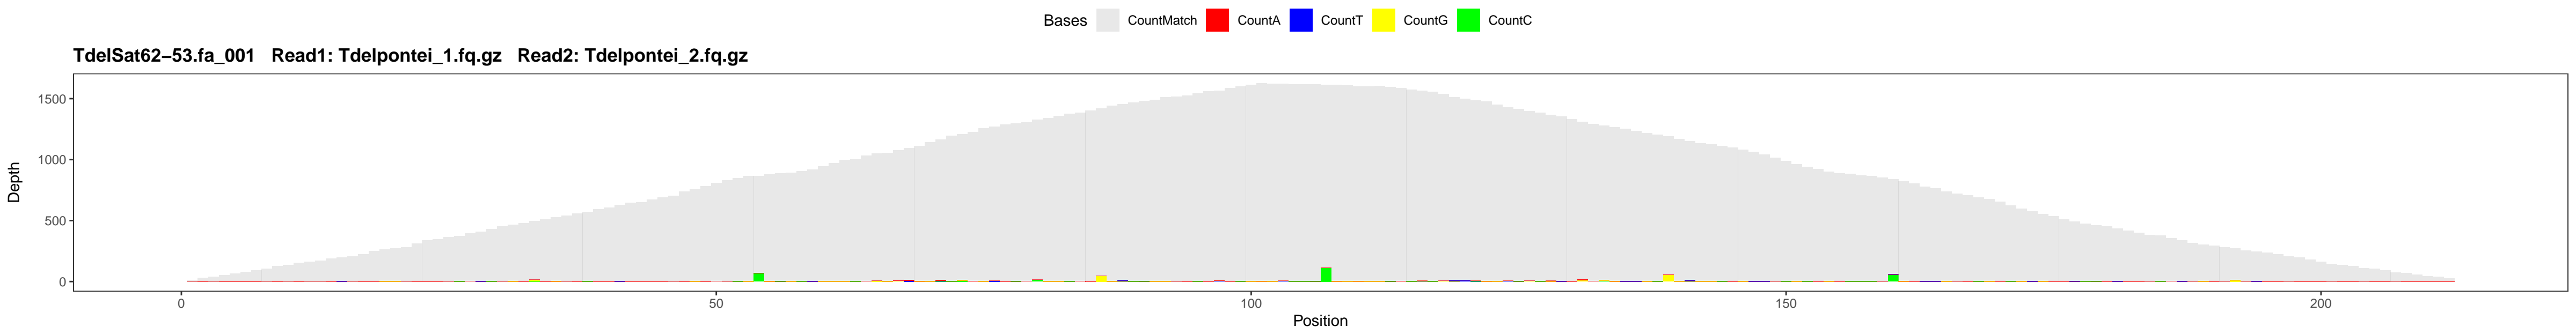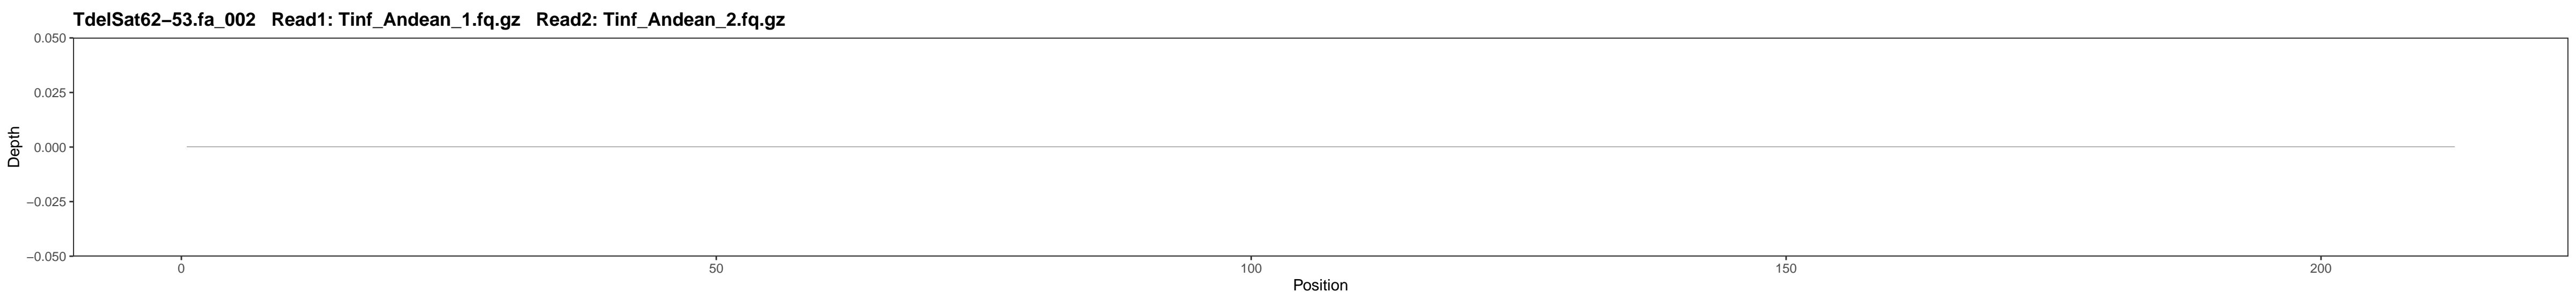

This graph has no coverage.

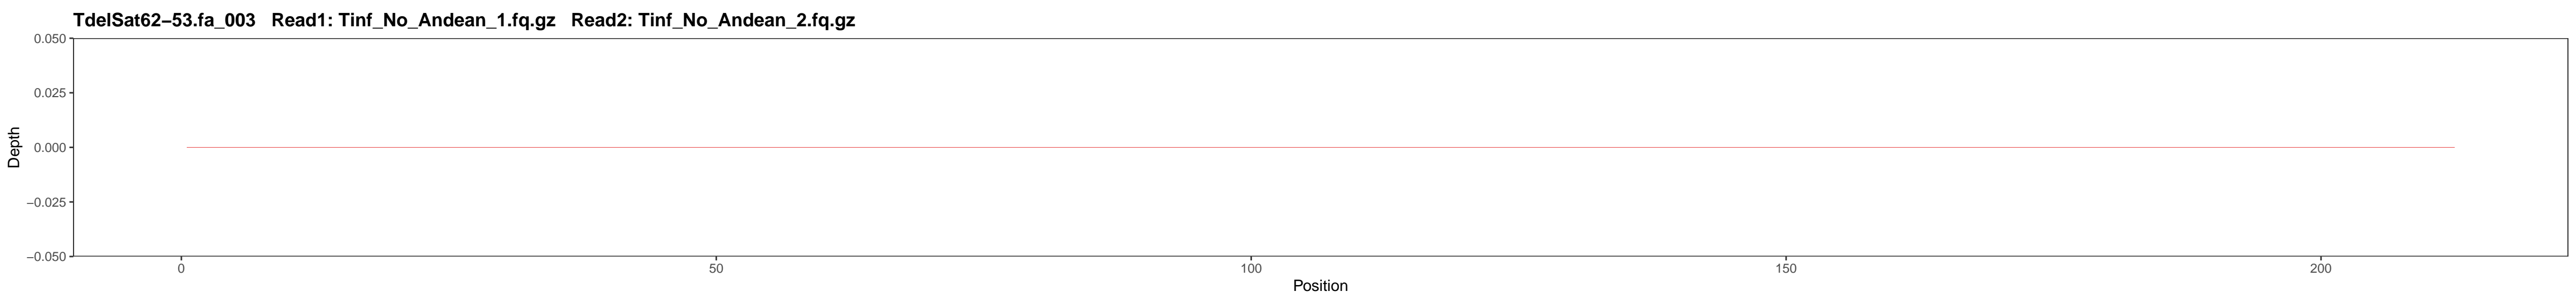

This graph has no coverage.



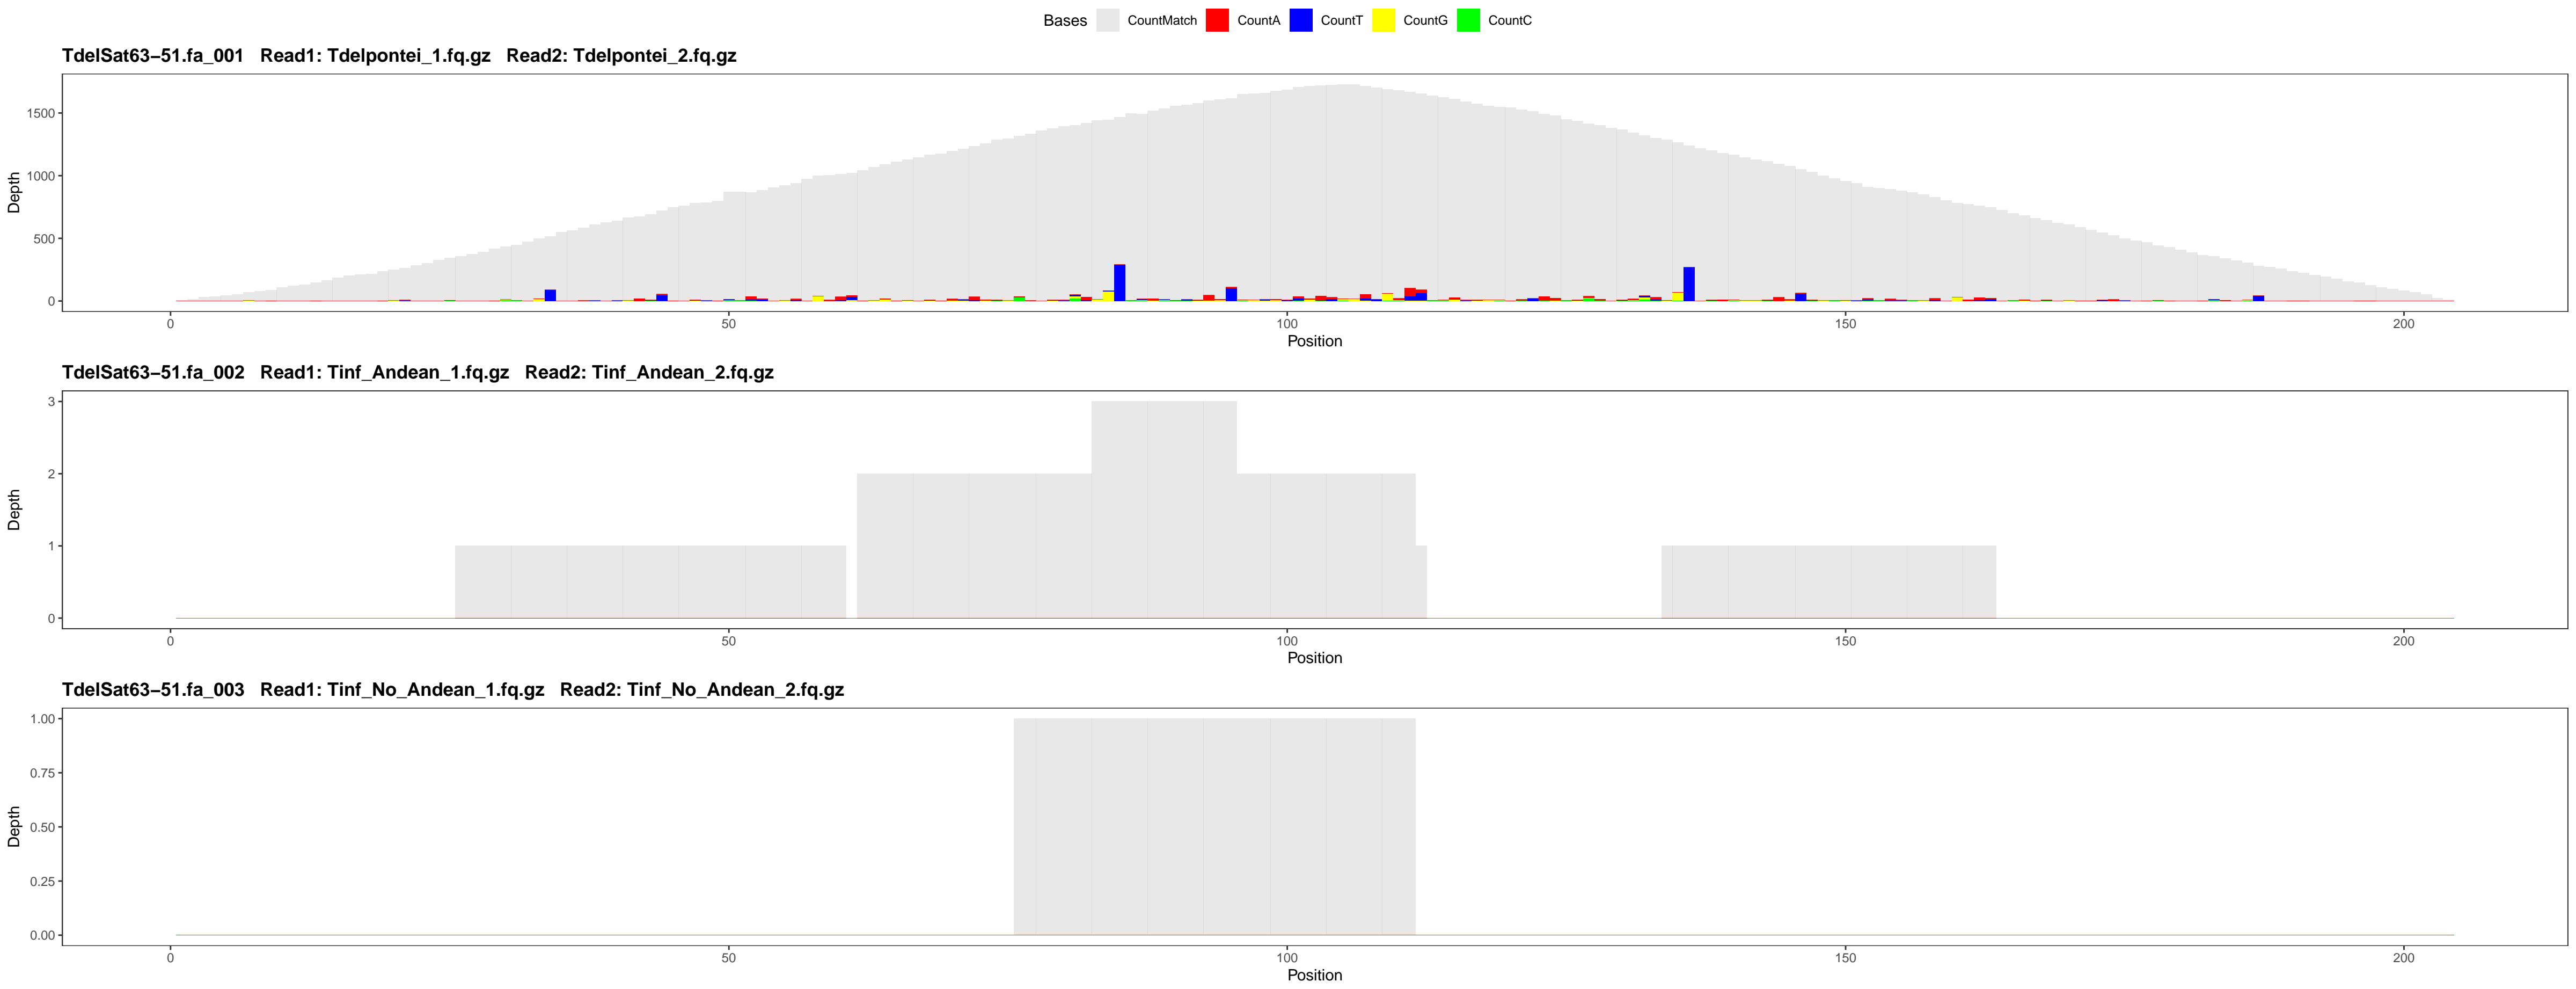

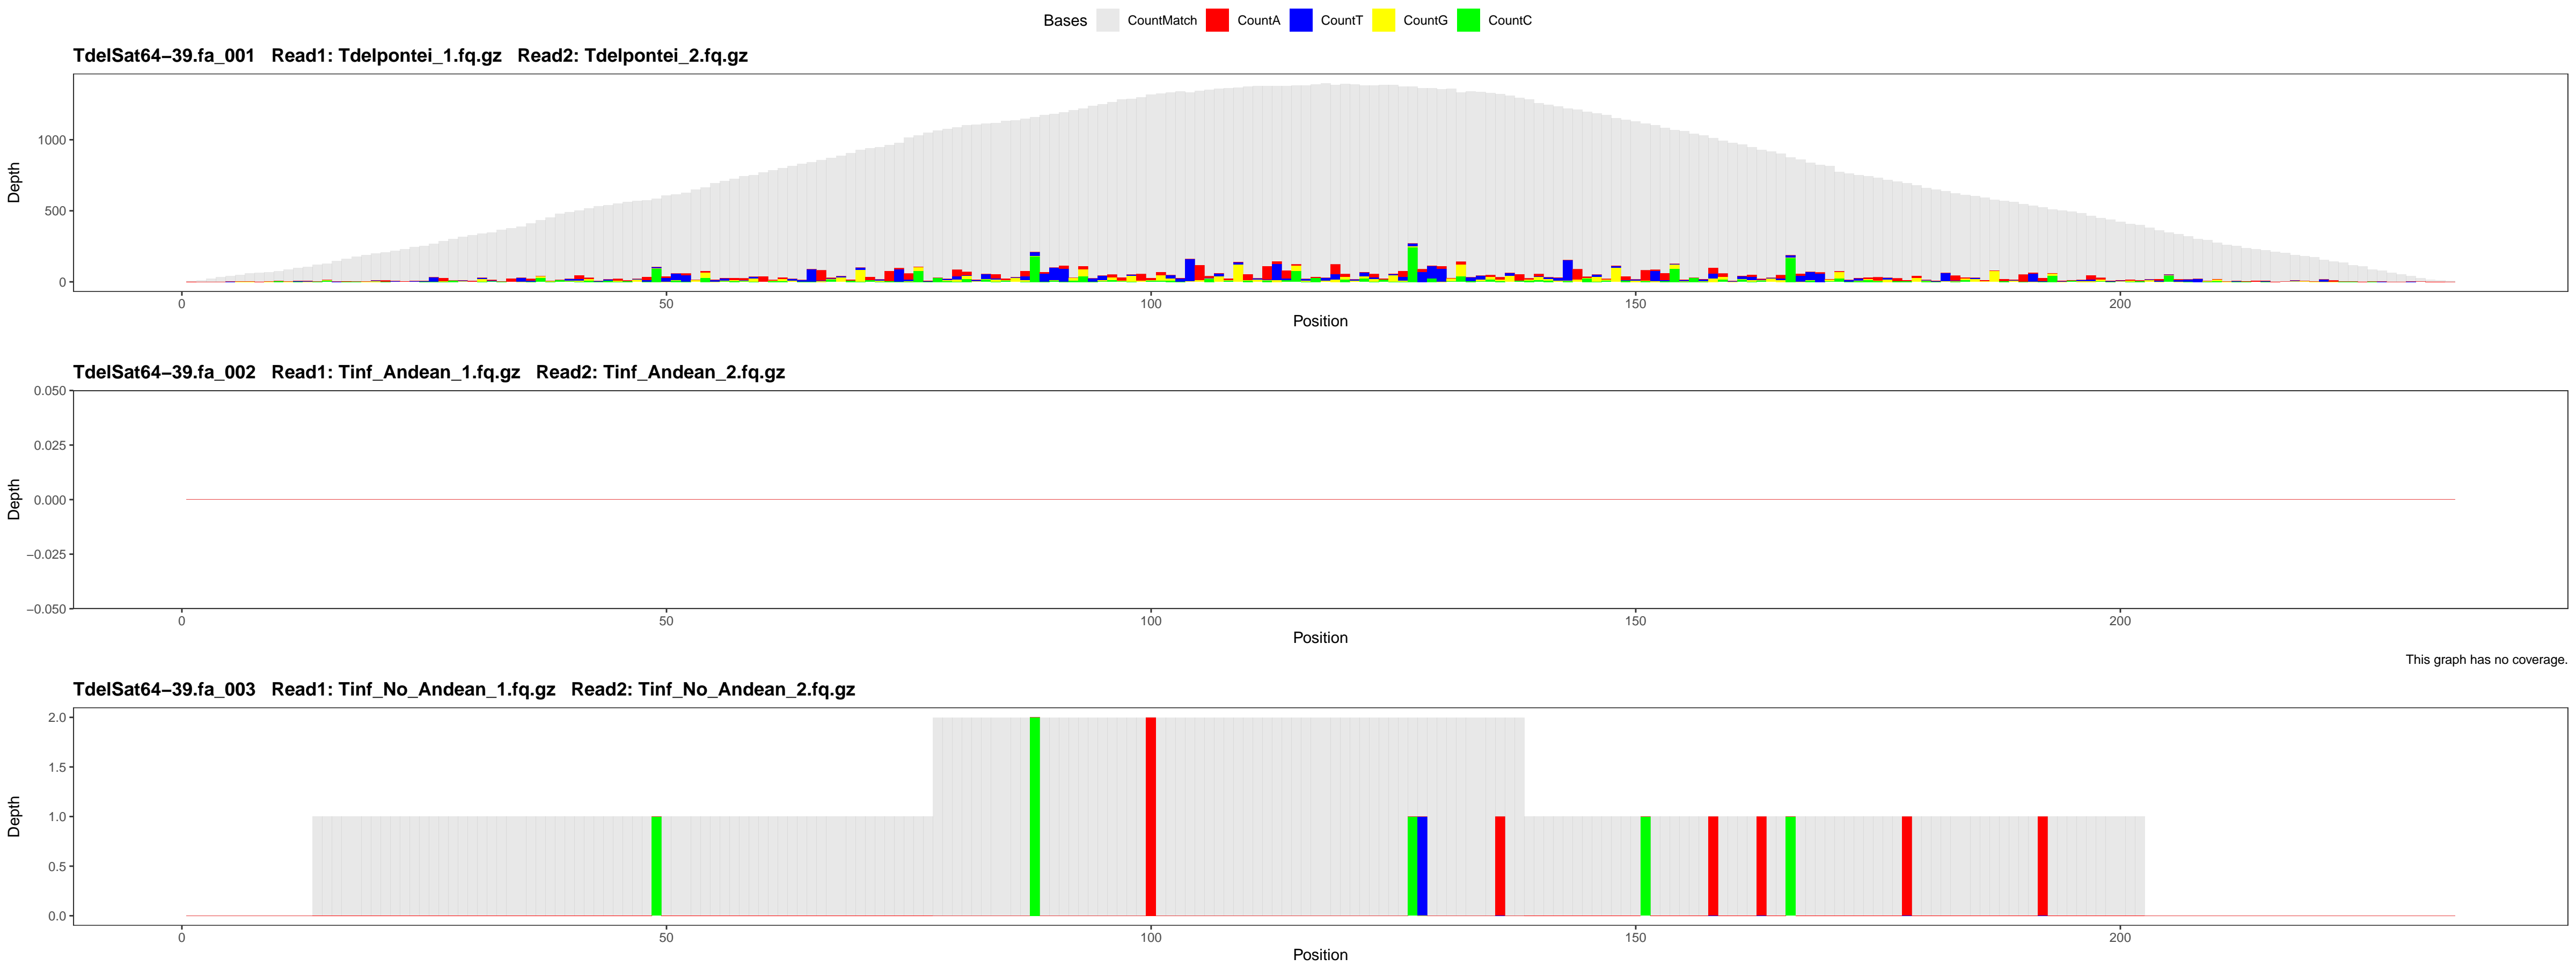

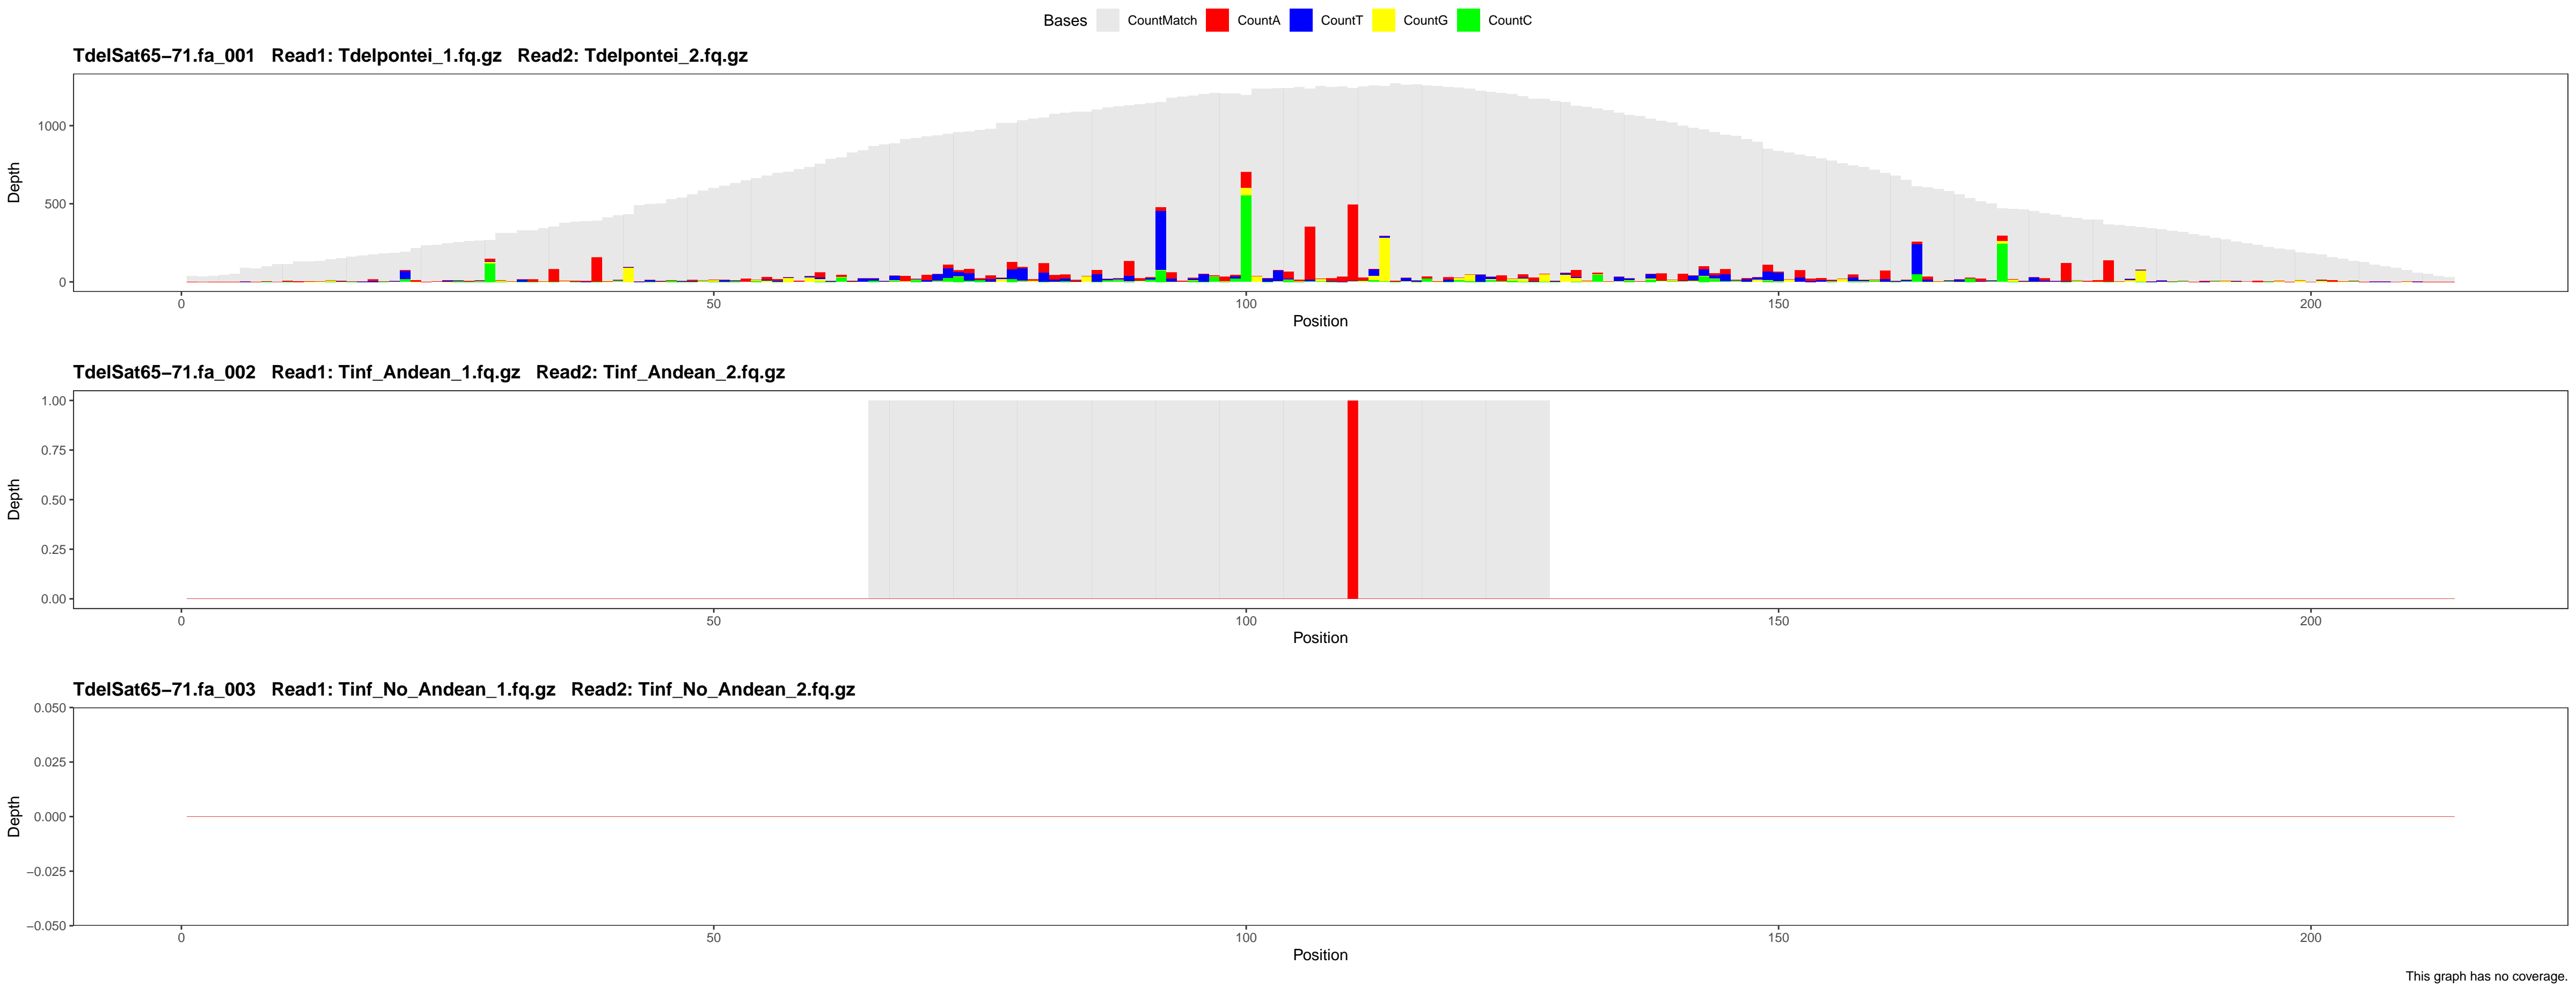

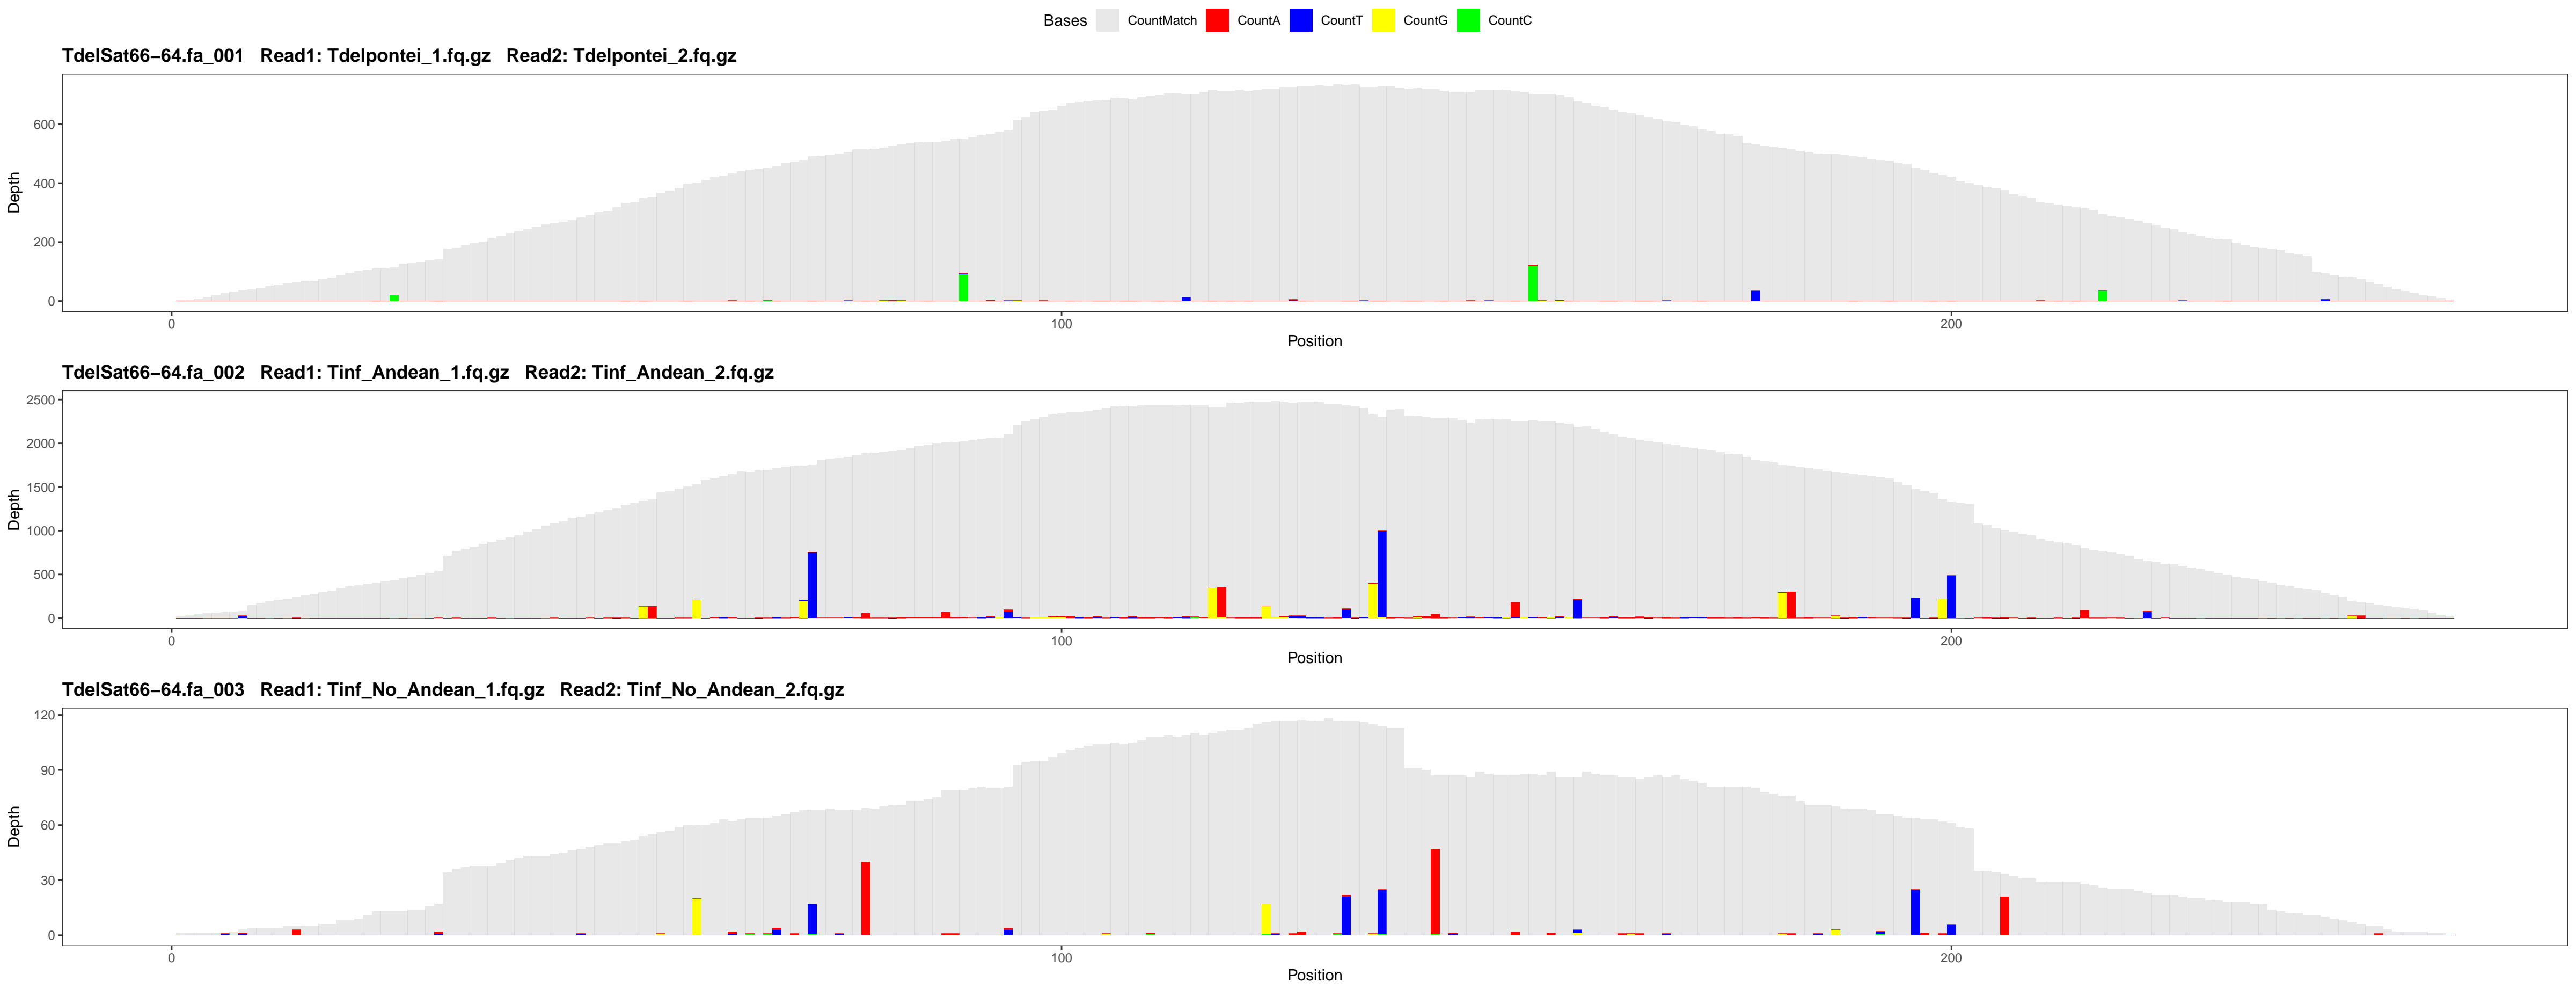

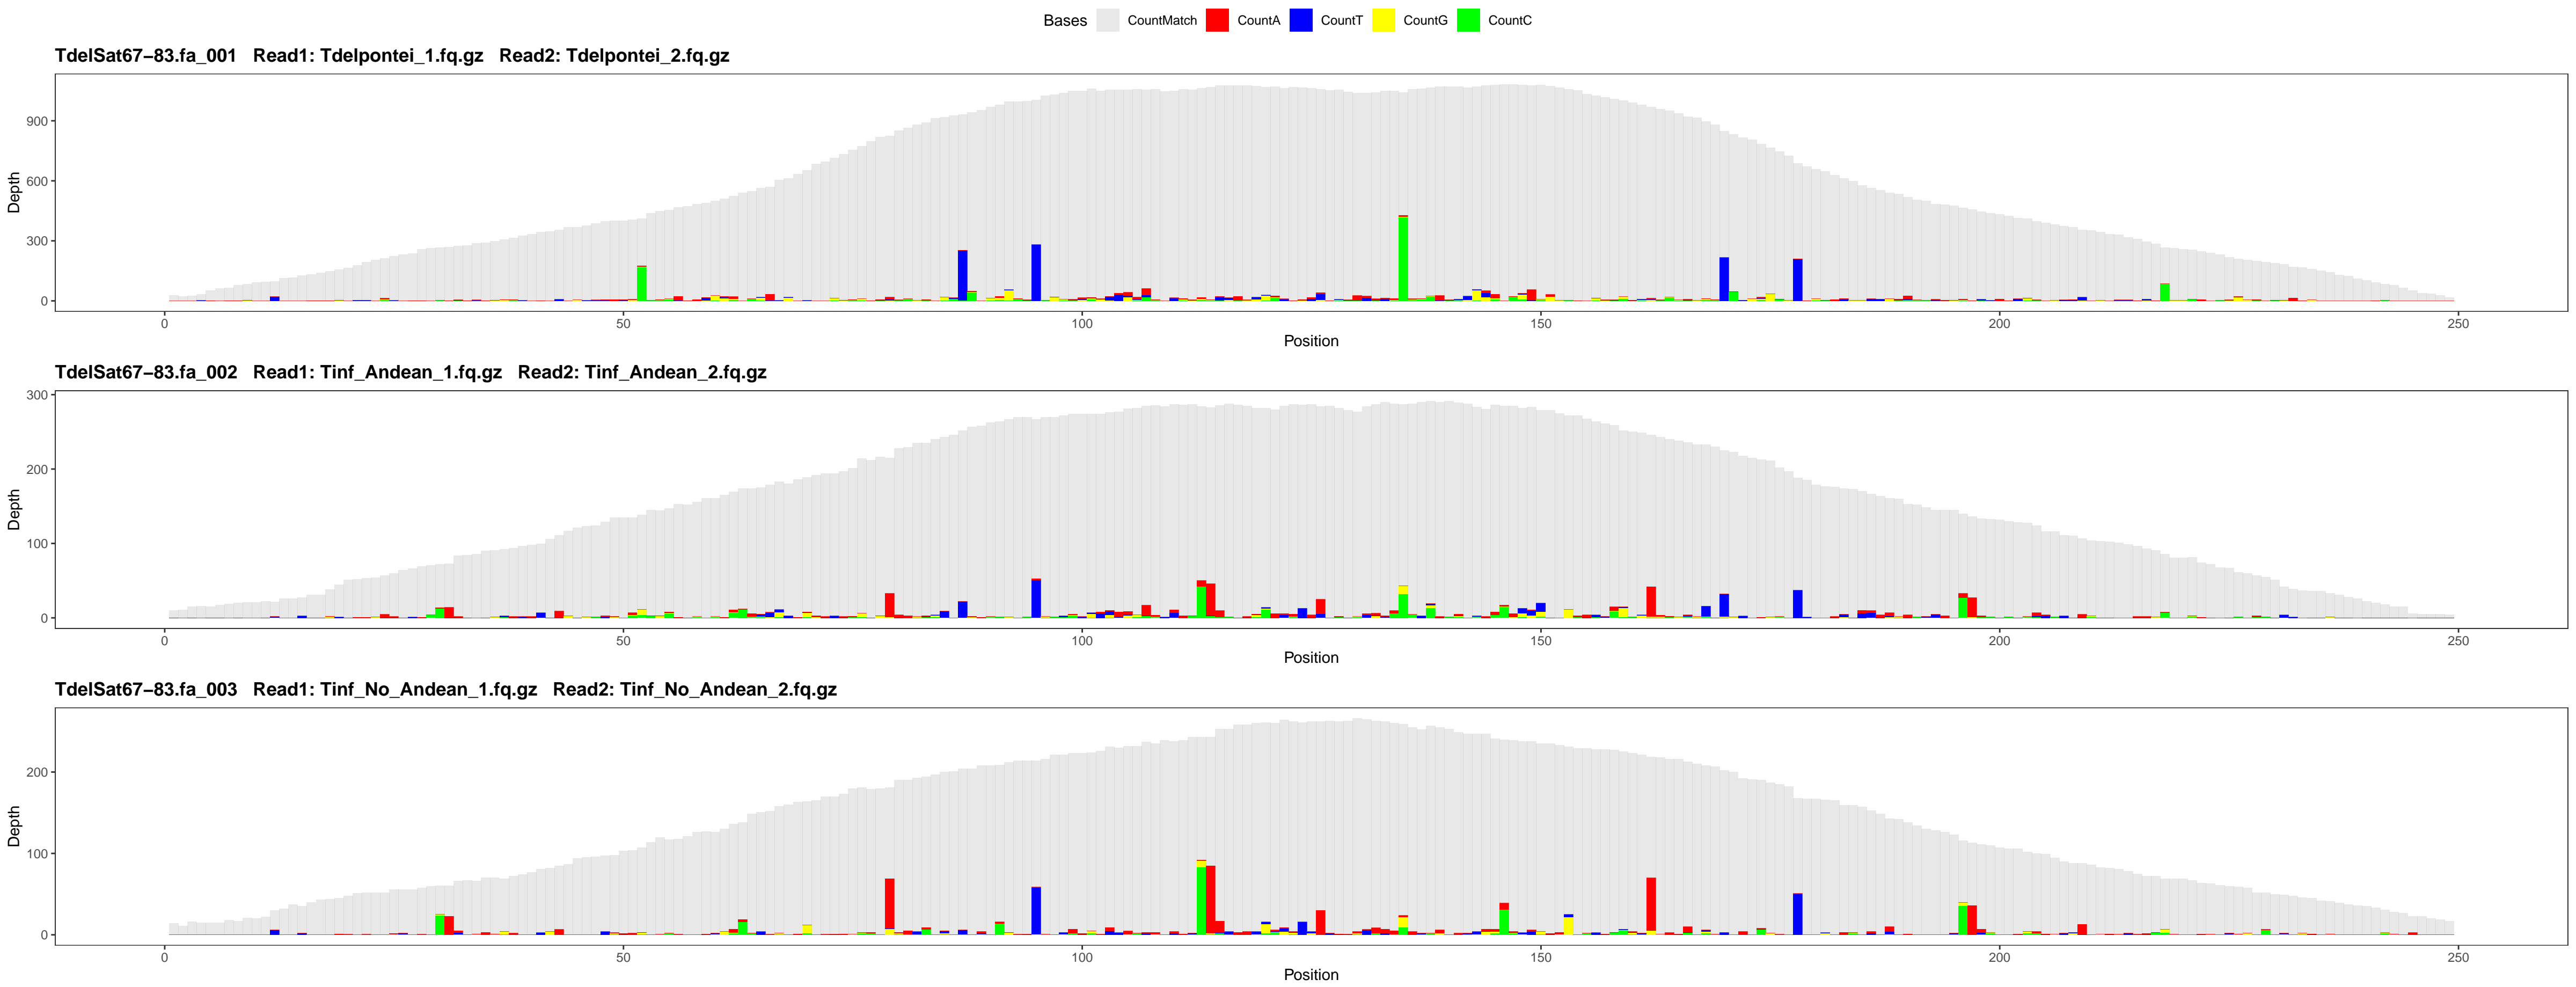

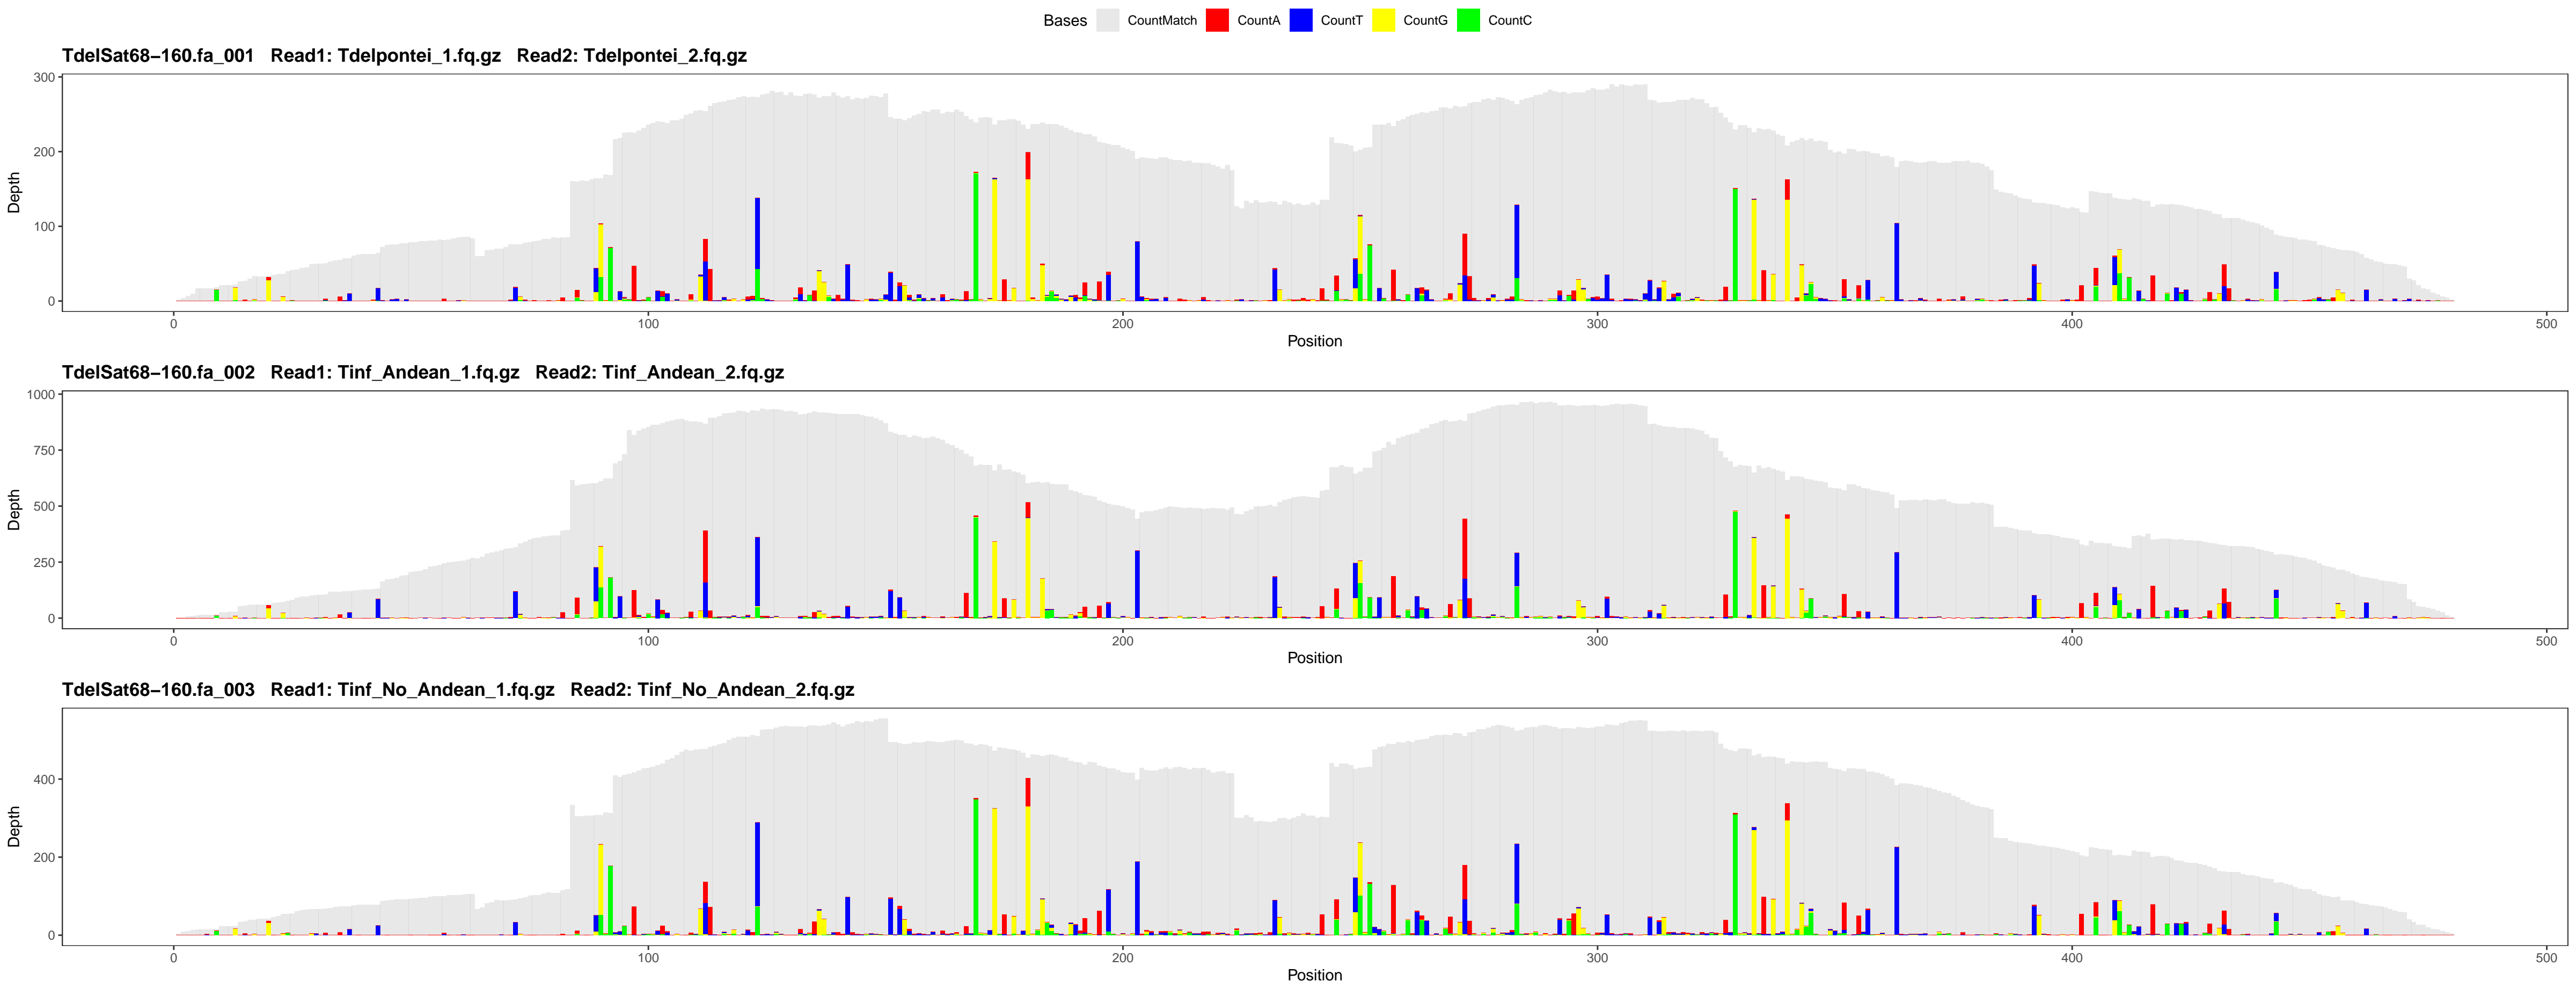

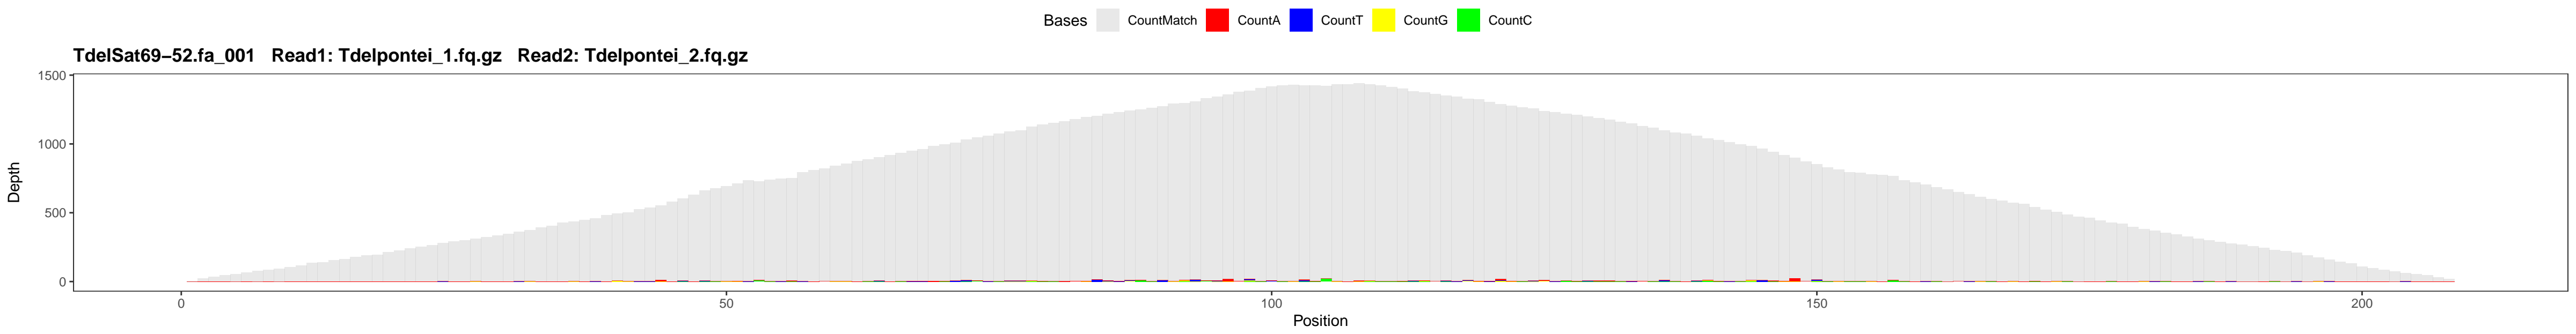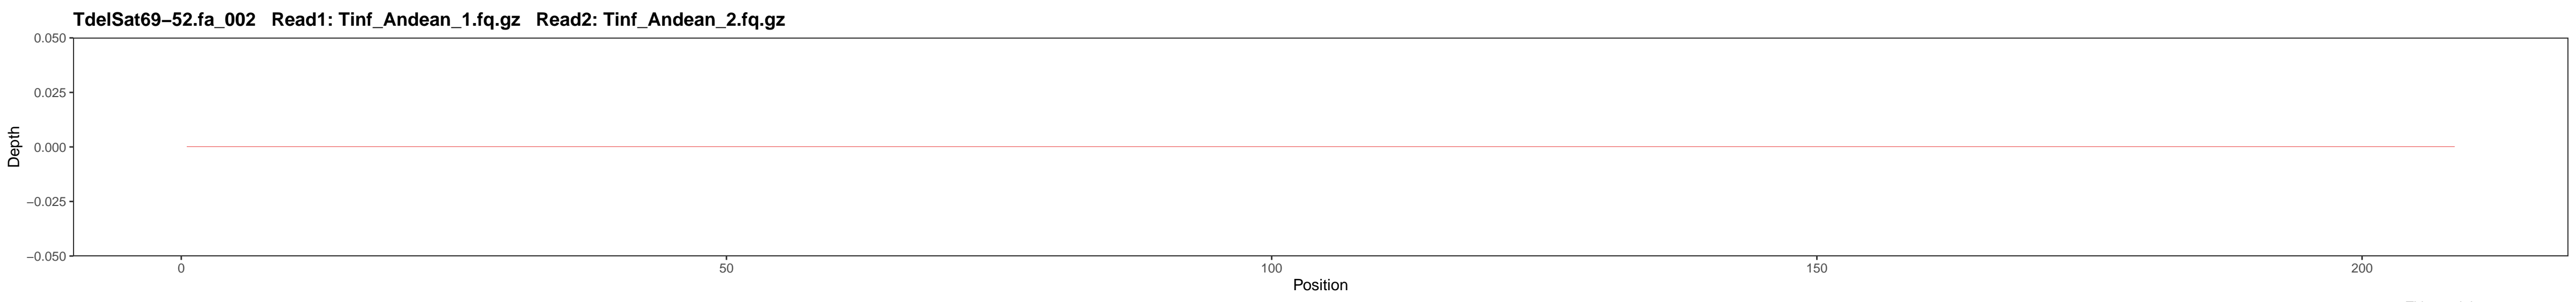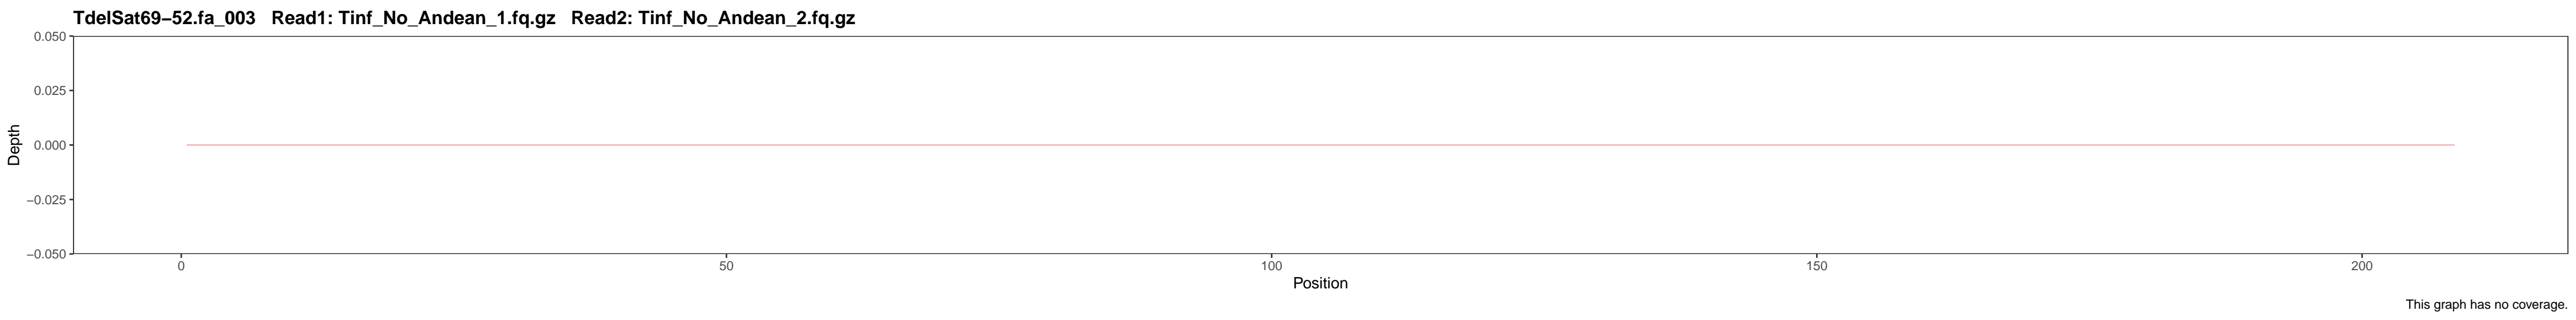

Bases CountMatch CountA CountT CountG CountC

TdelSat70-86.fa\_001 Read1: Tdelpontei\_1.fq.gz Read2: Tdelpontei\_2.fq.gz

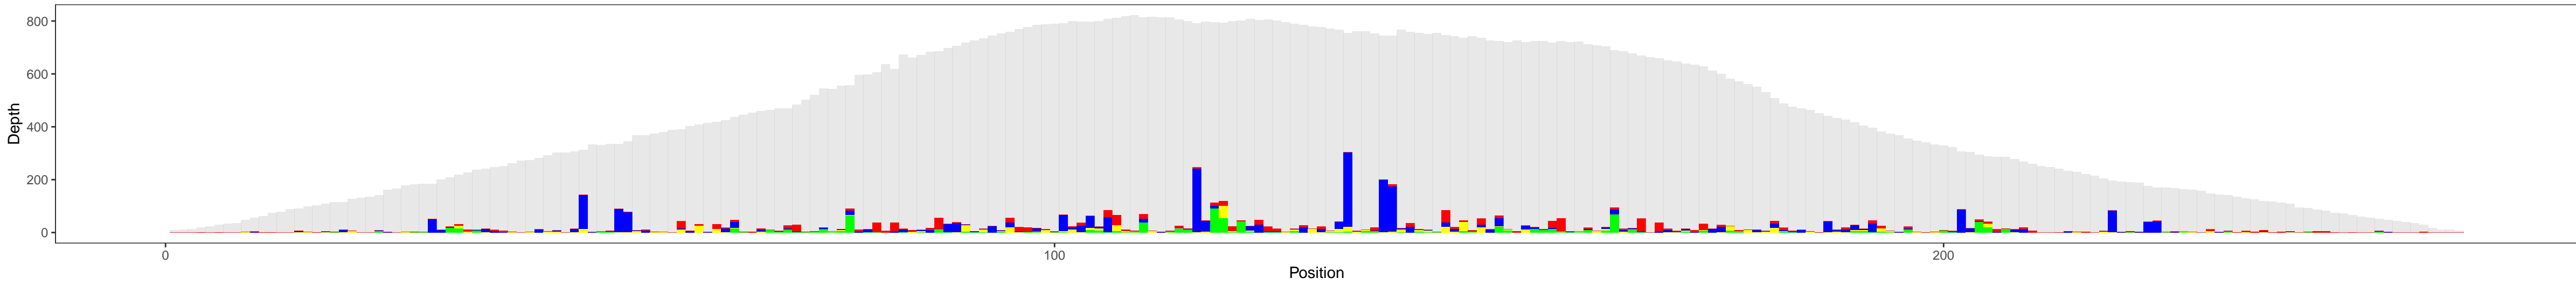

TdelSat70-86.fa\_002 Read1: Tinf\_Andean\_1.fq.gz Read2: Tinf\_Andean\_2.fq.gz

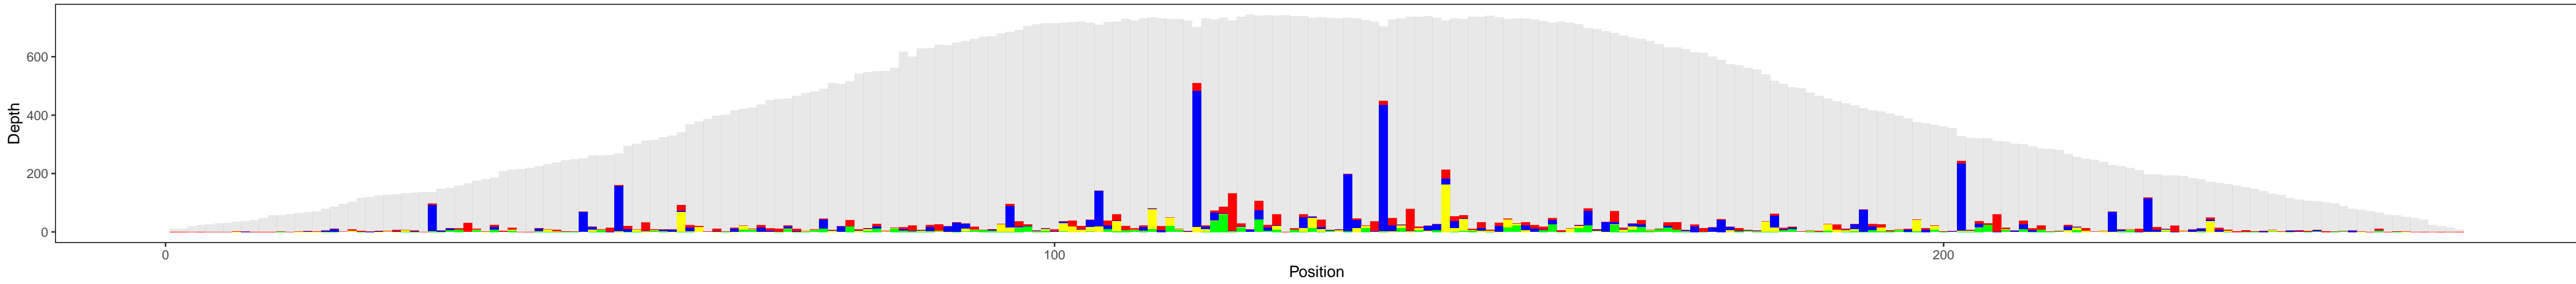

TdelSat70-86.fa\_003 Read1: Tinf\_No\_Andean\_1.fq.gz Read2: Tinf\_No\_Andean\_2.fq.gz

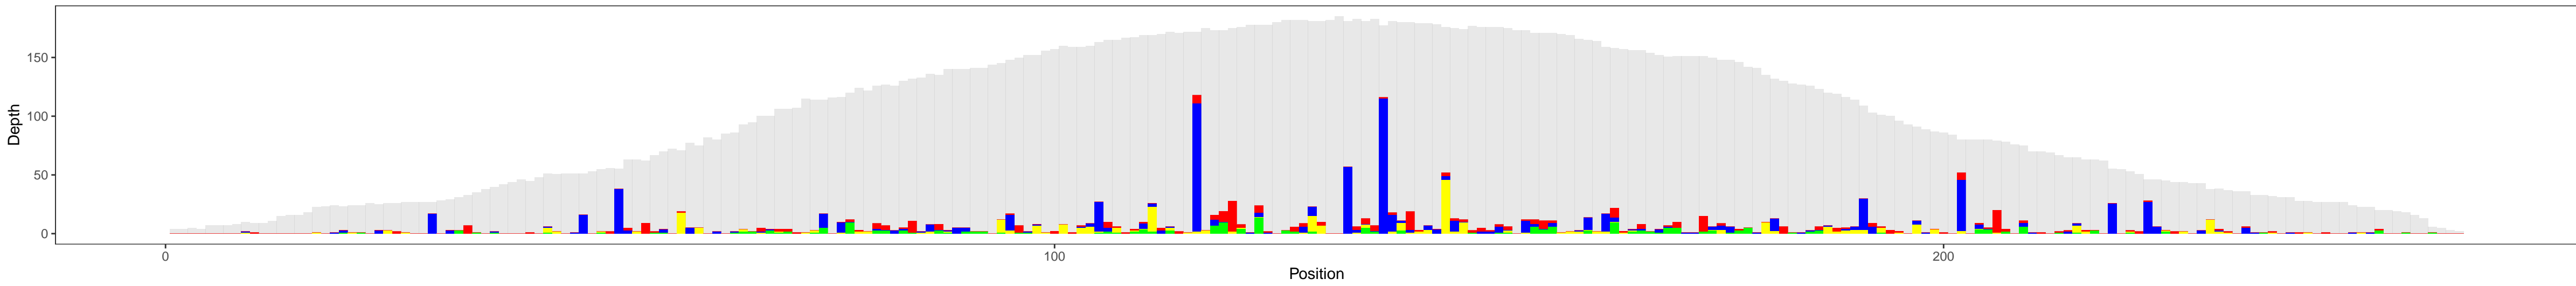



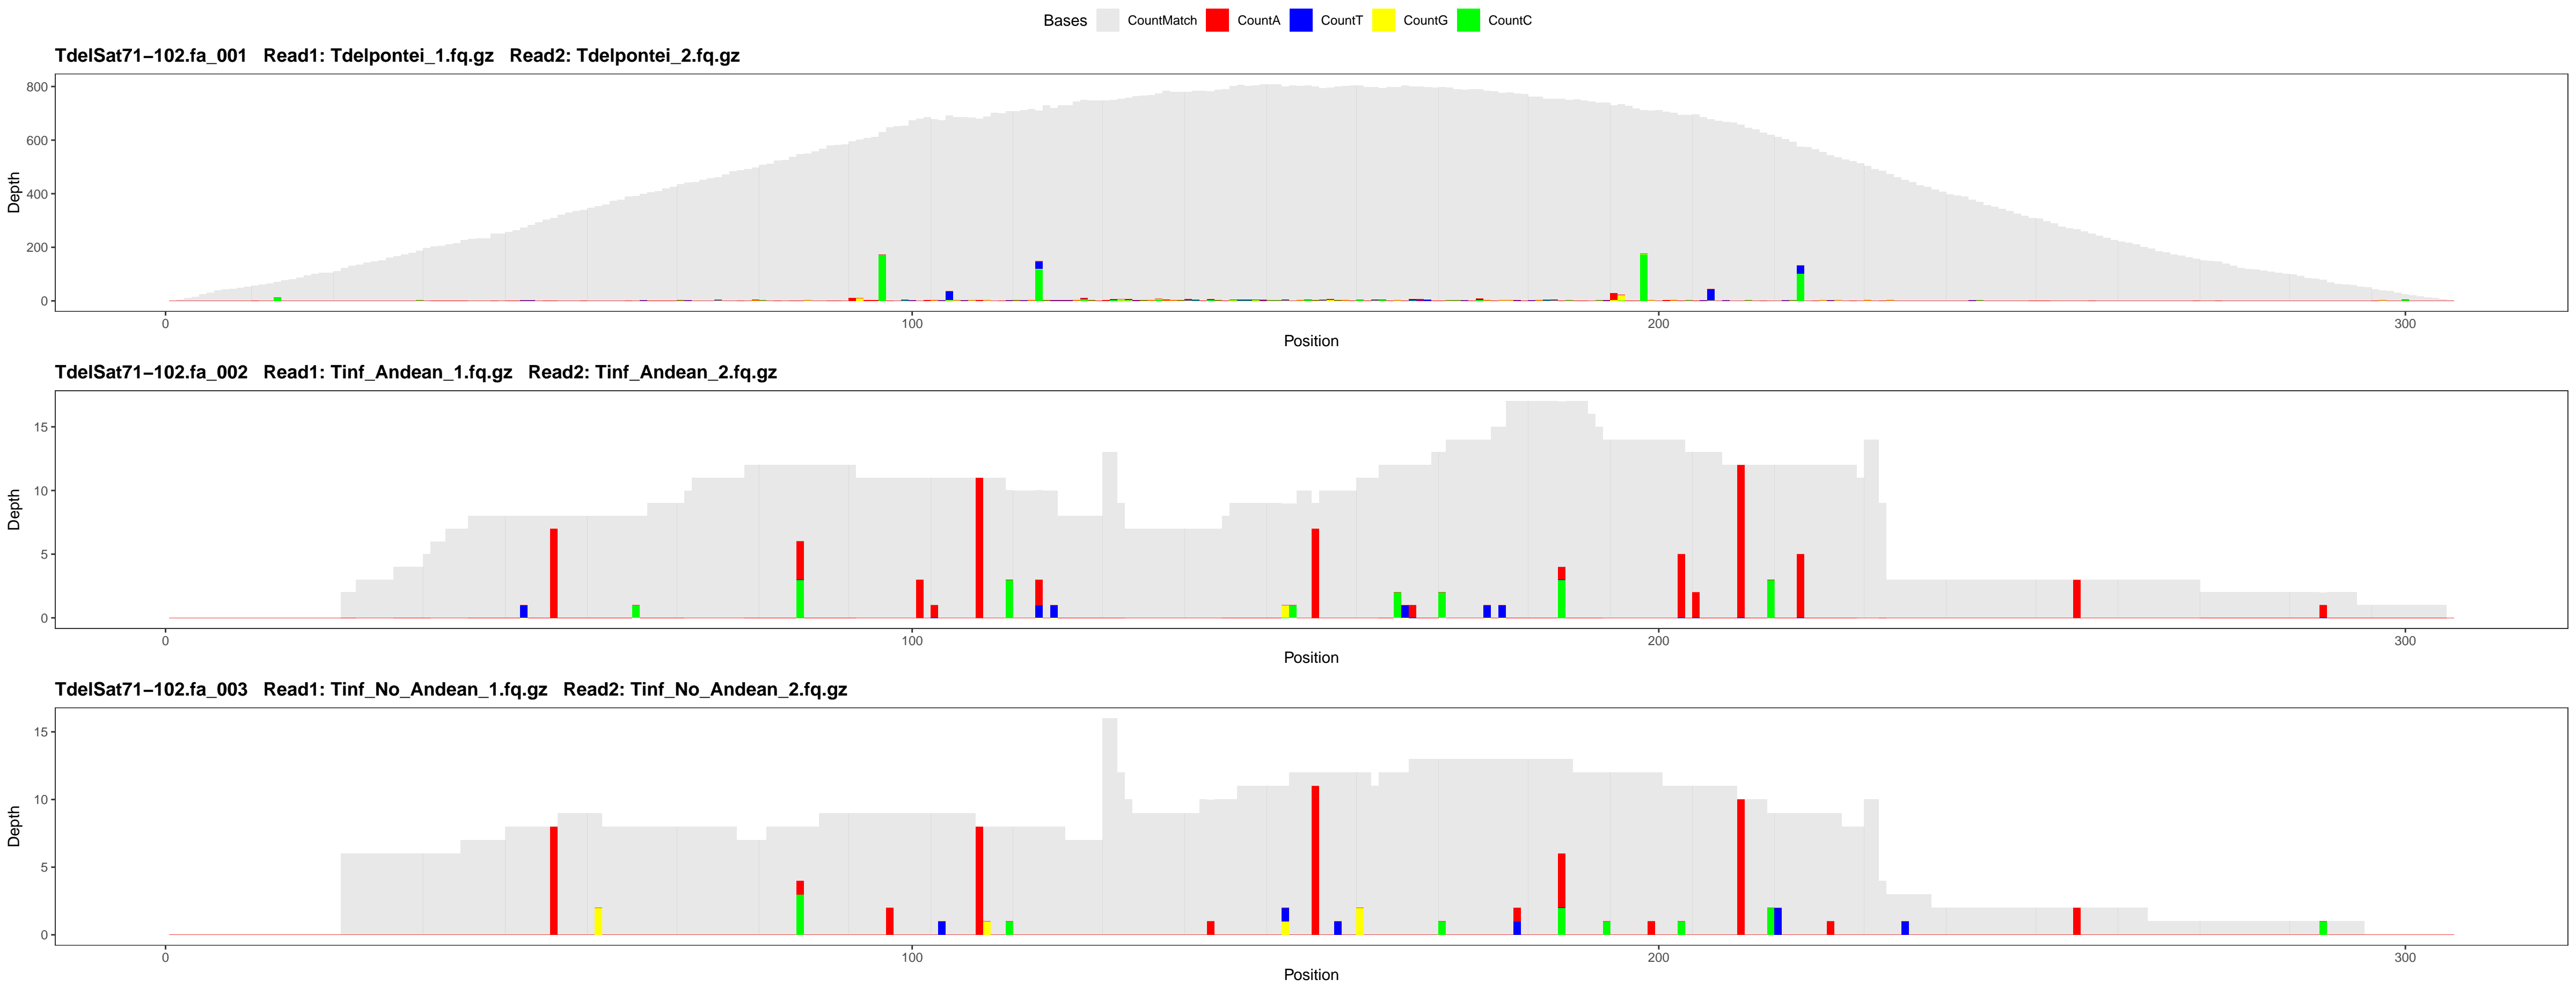

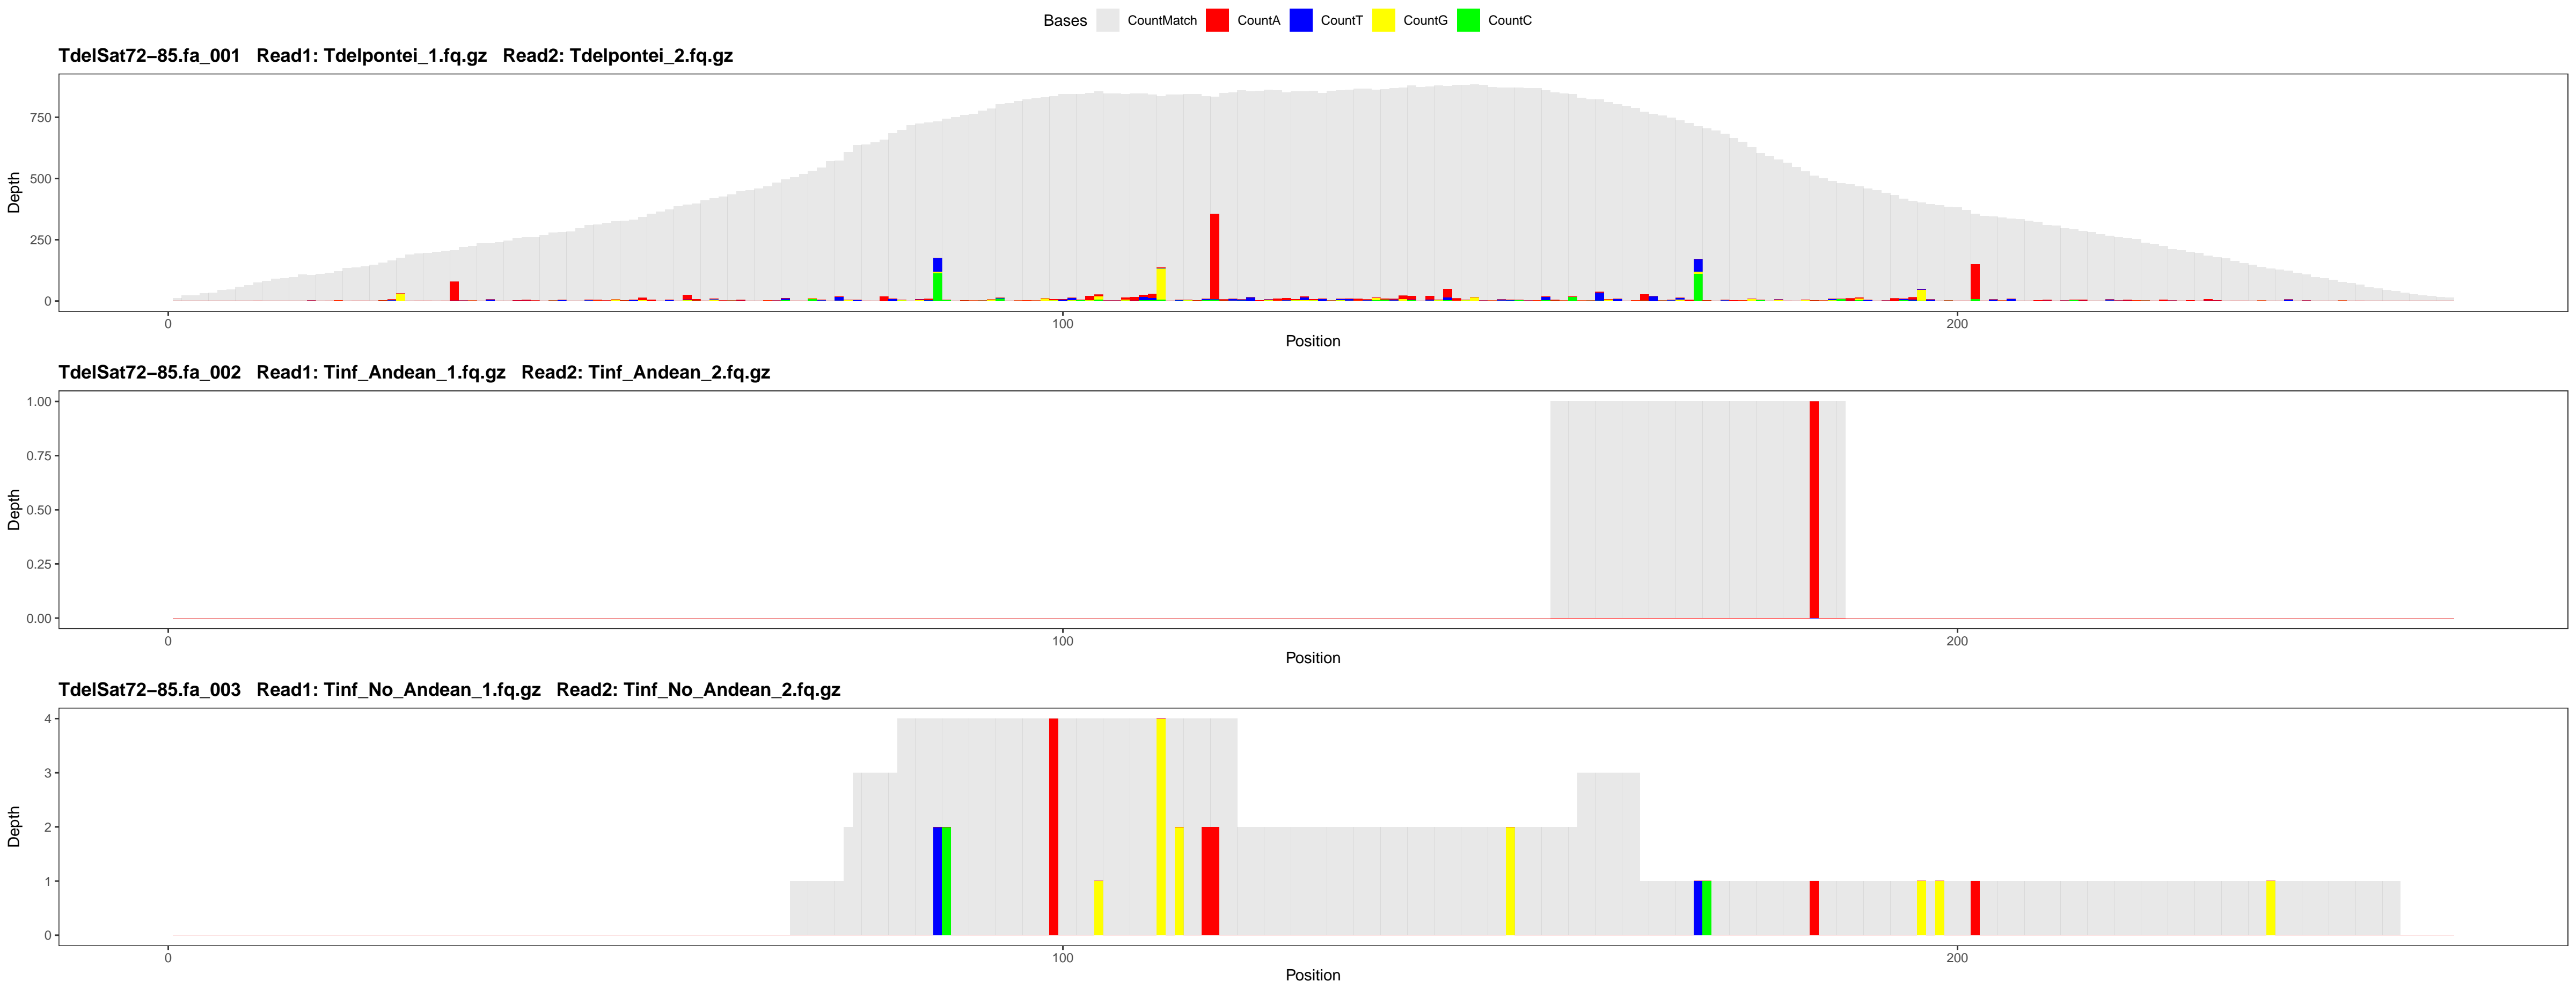

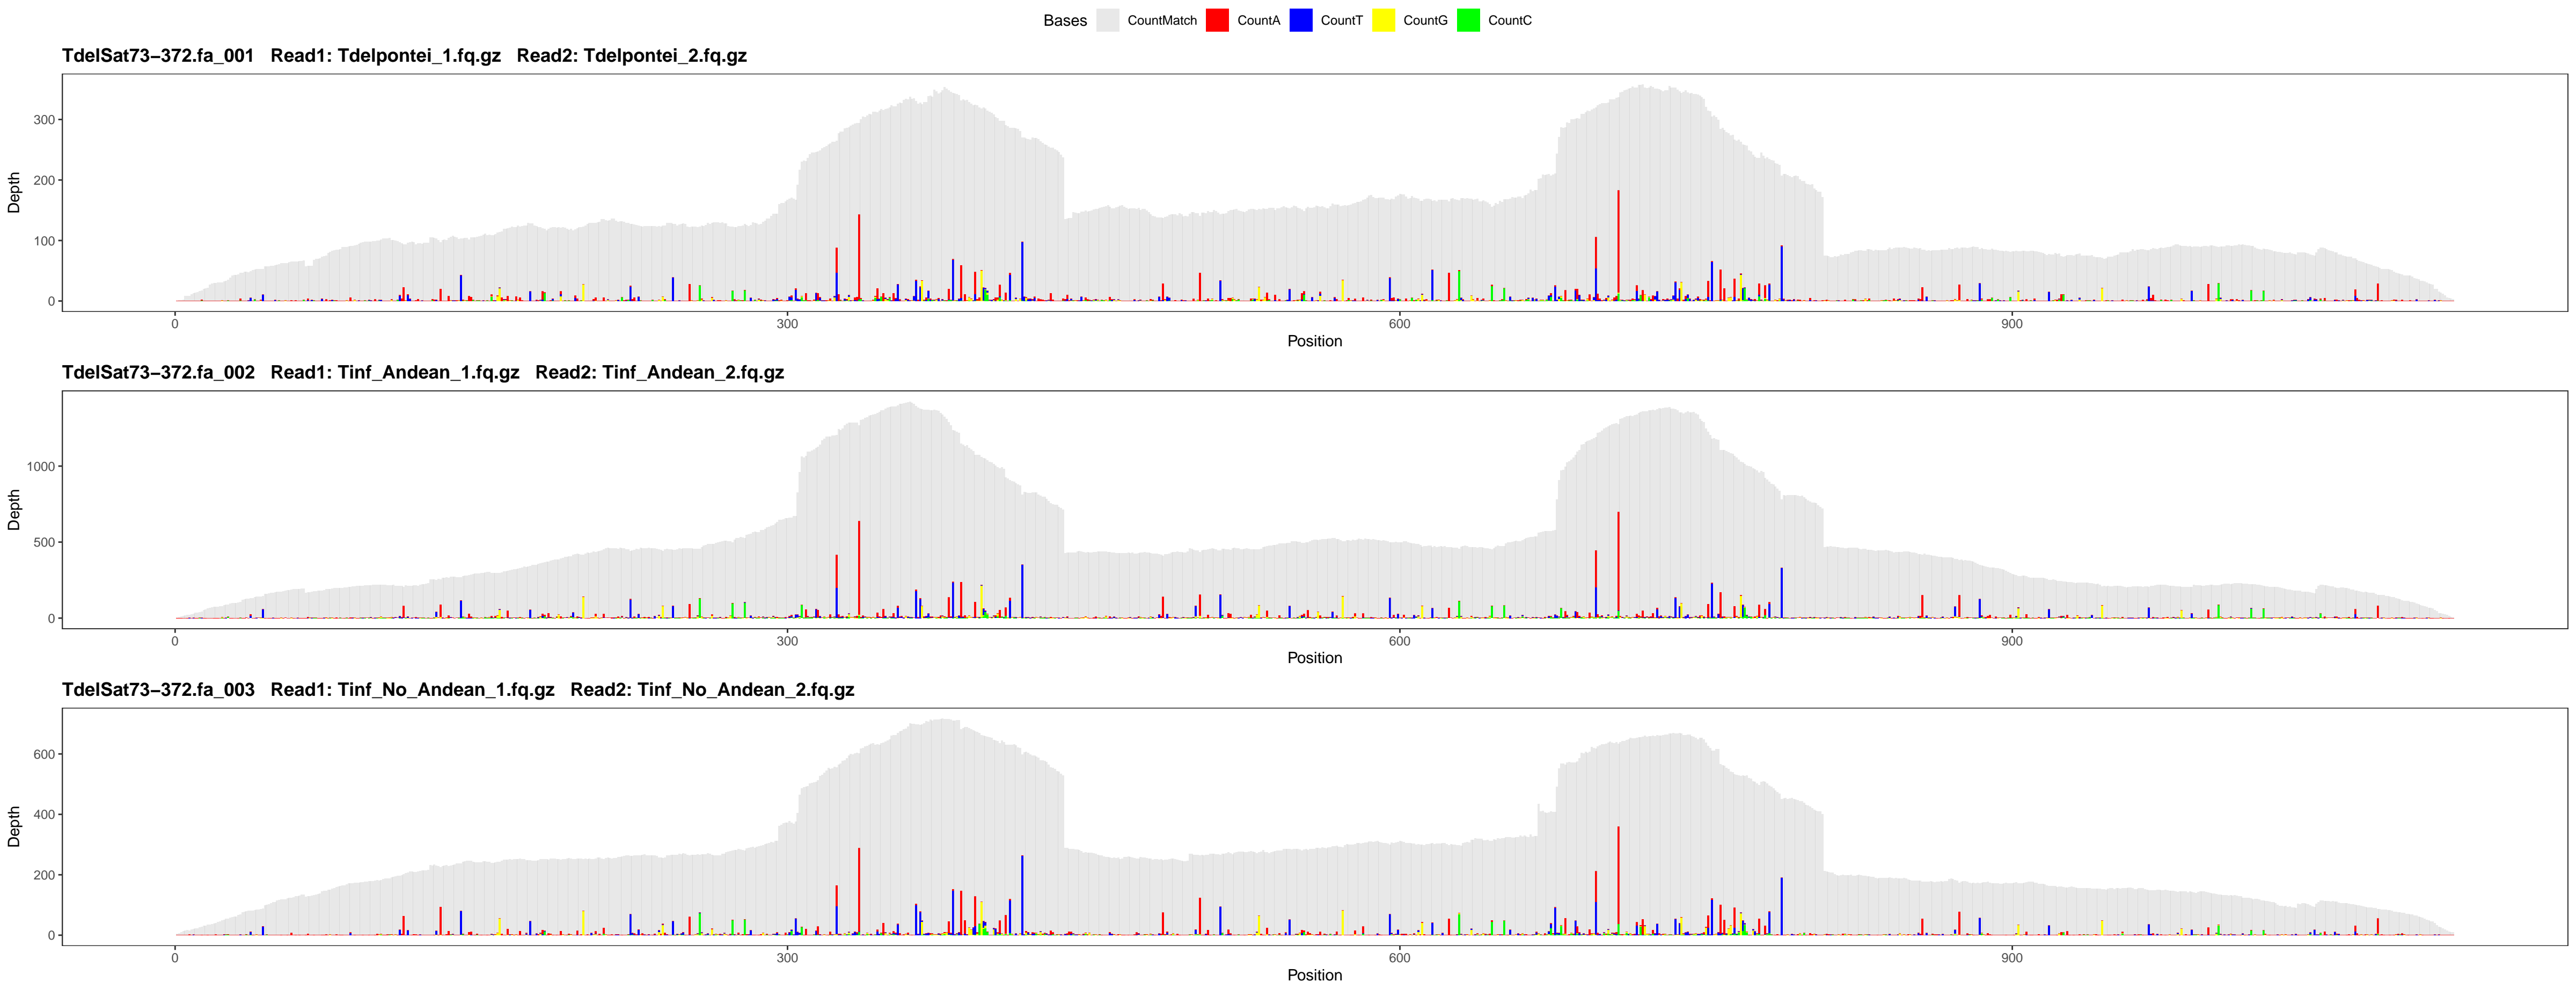

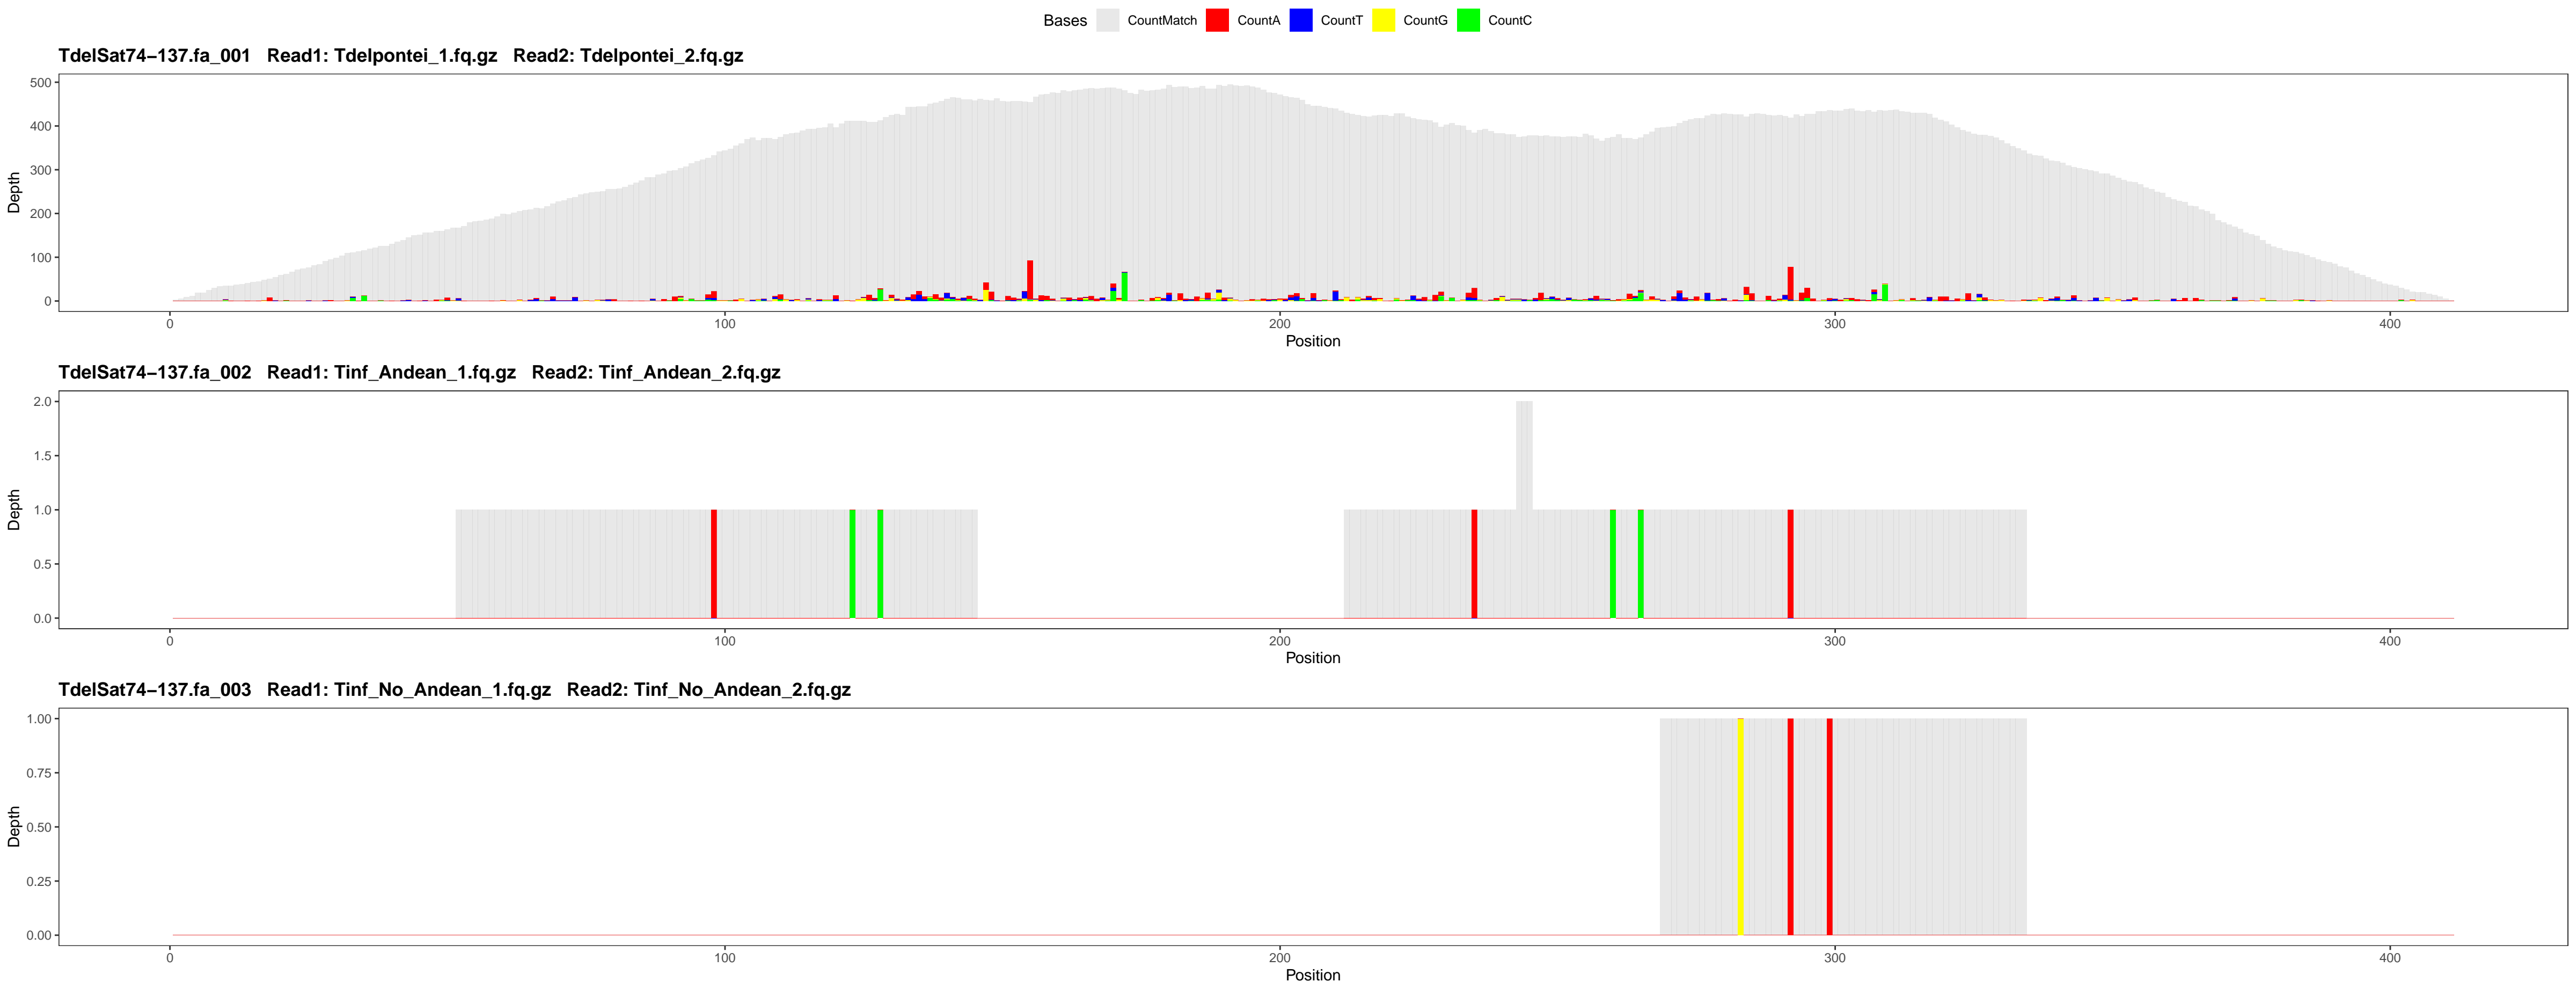

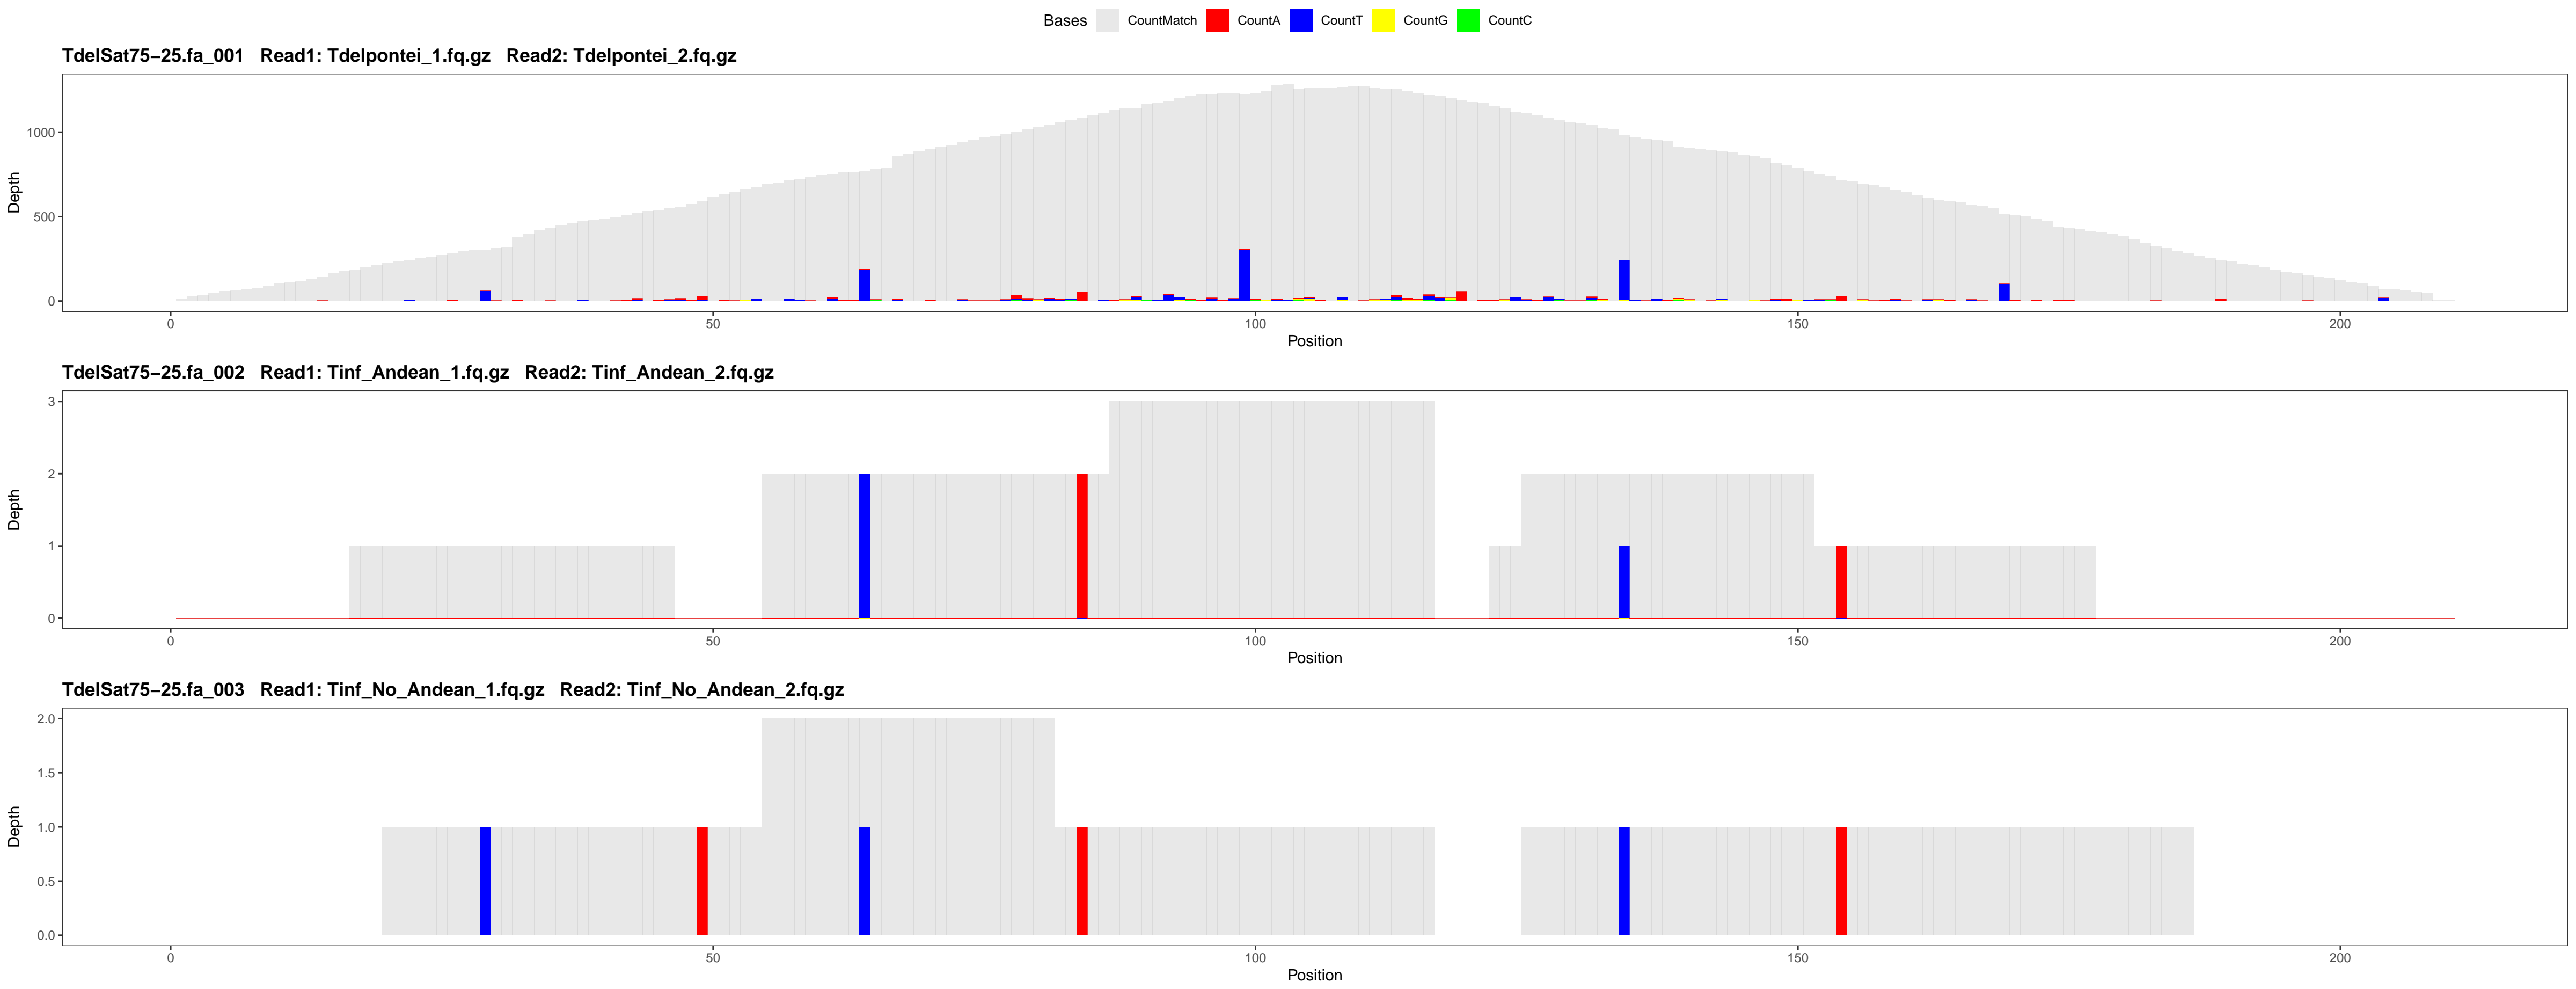

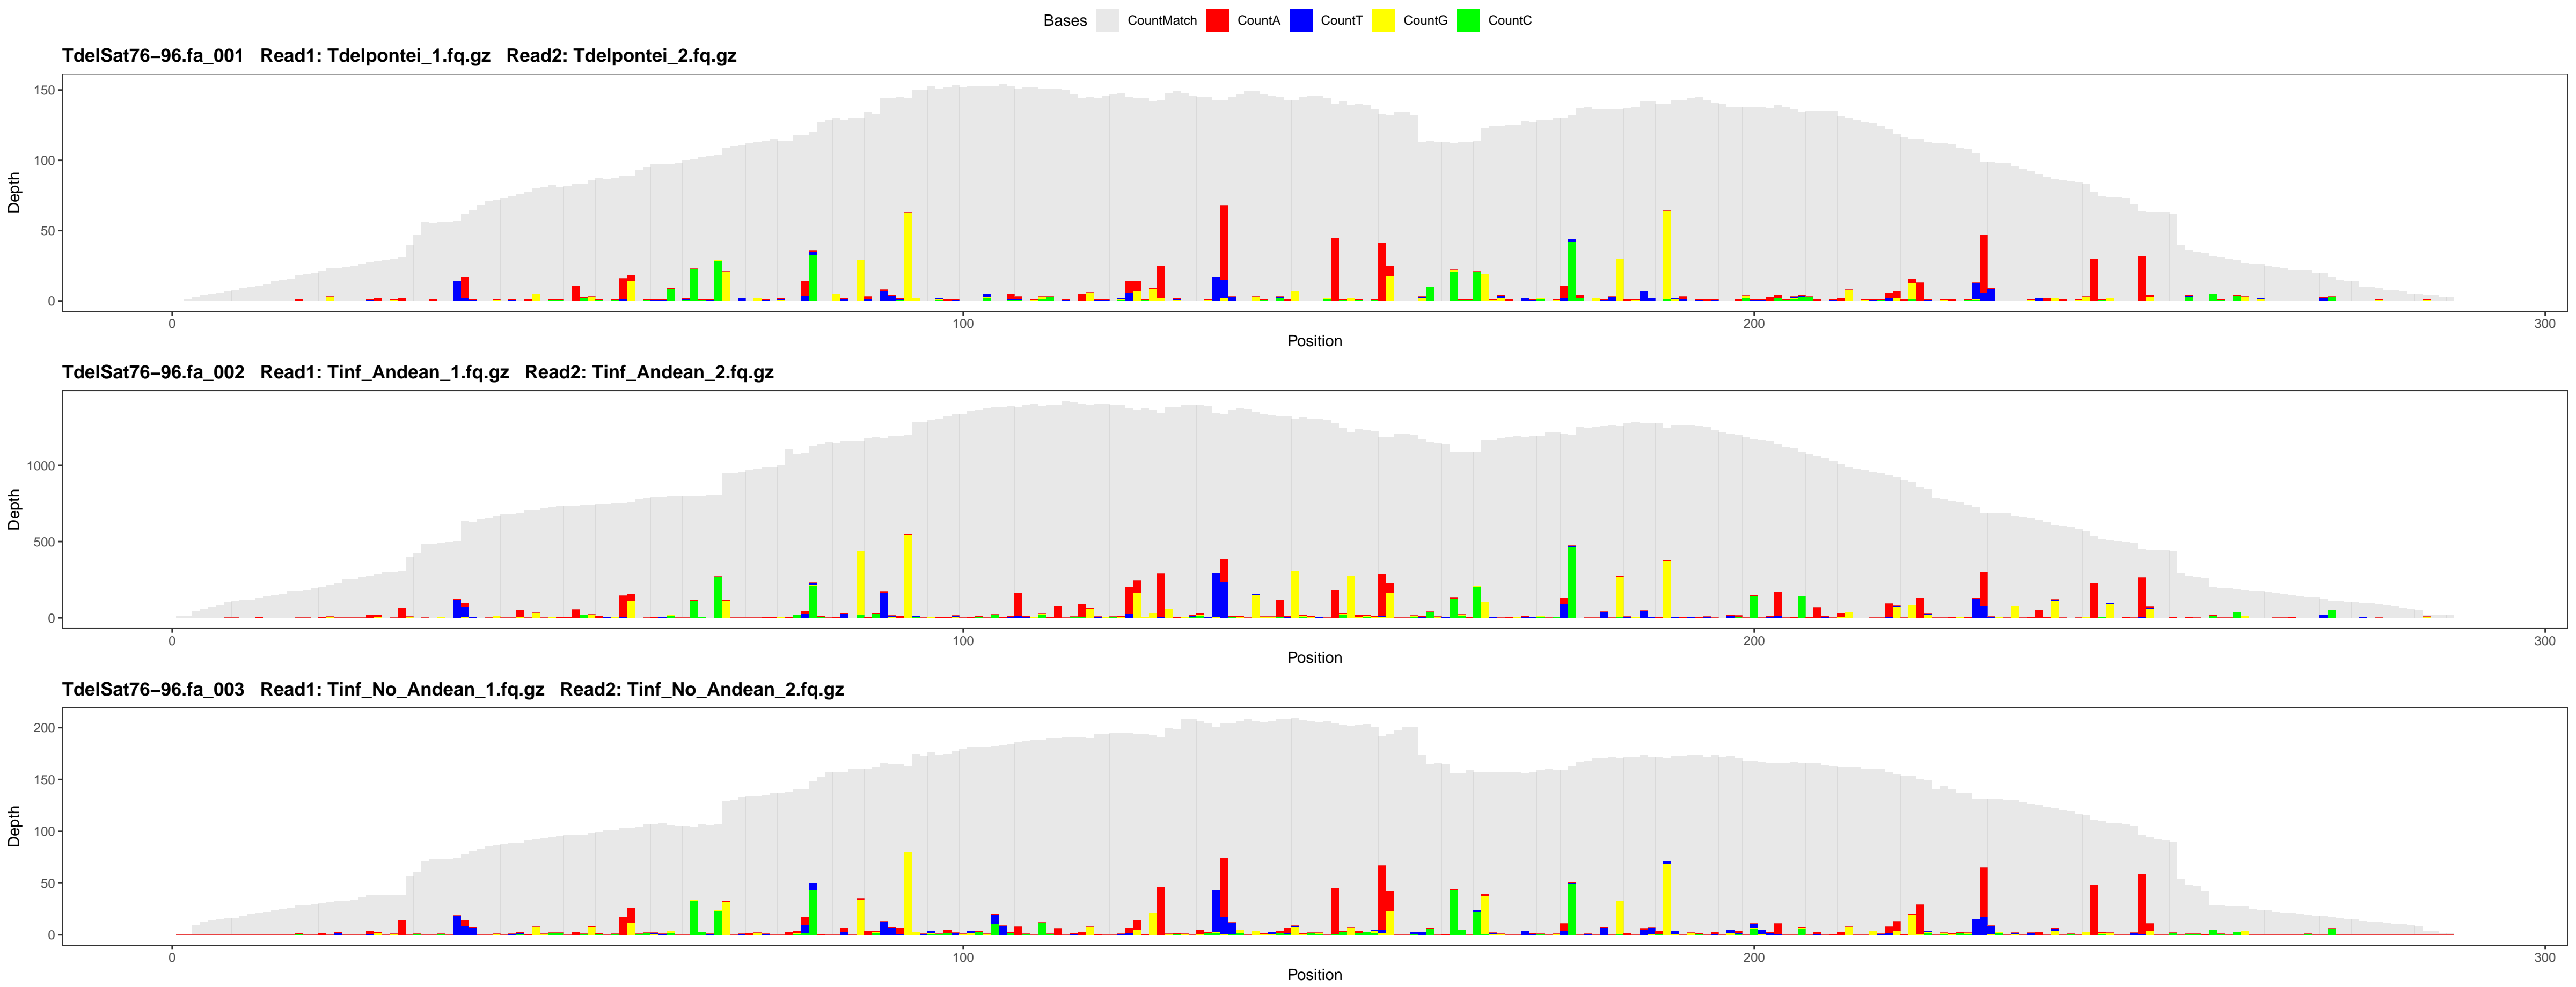

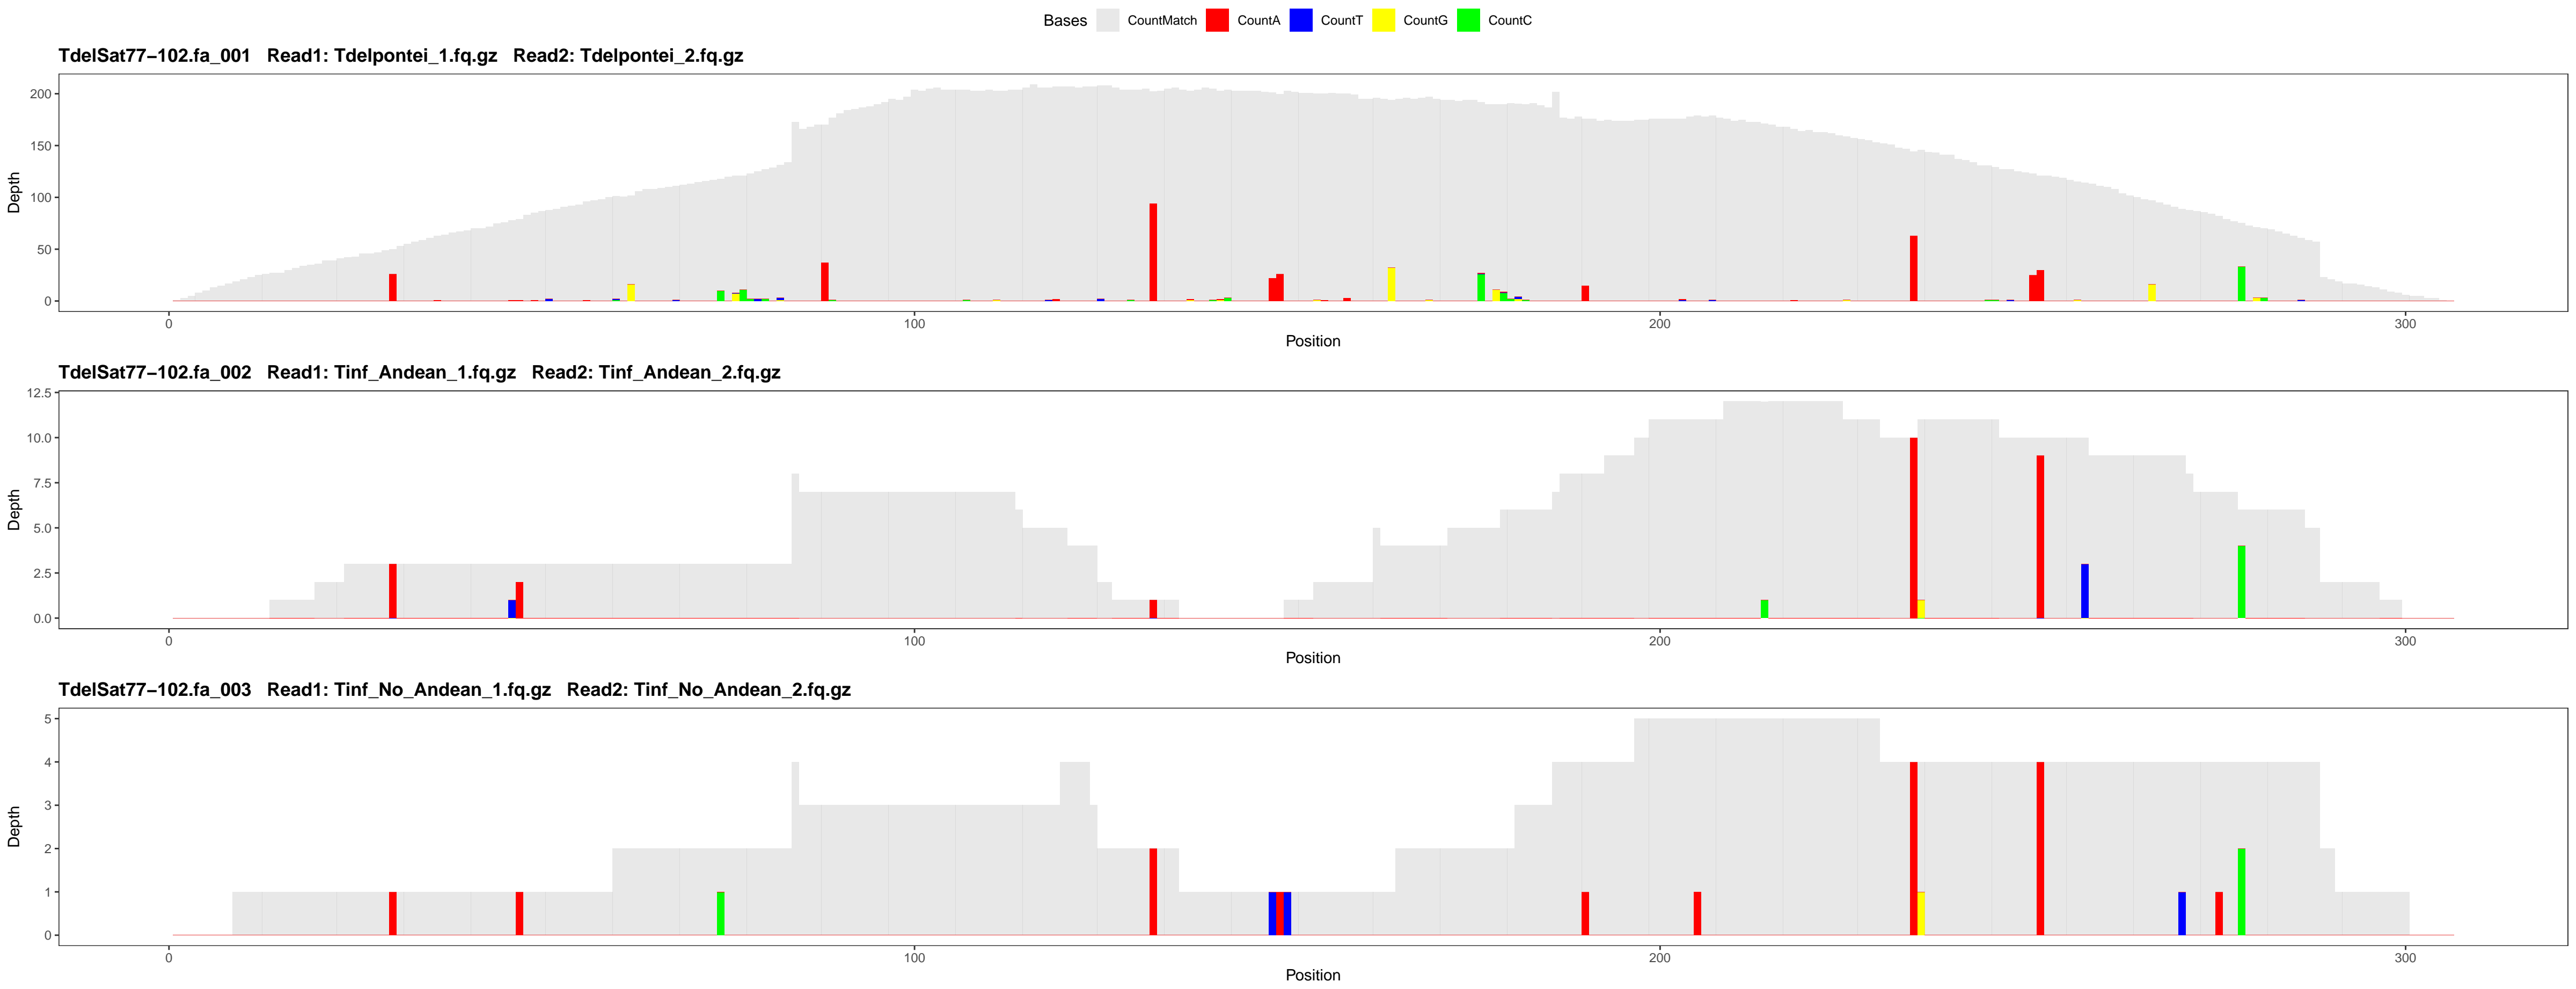

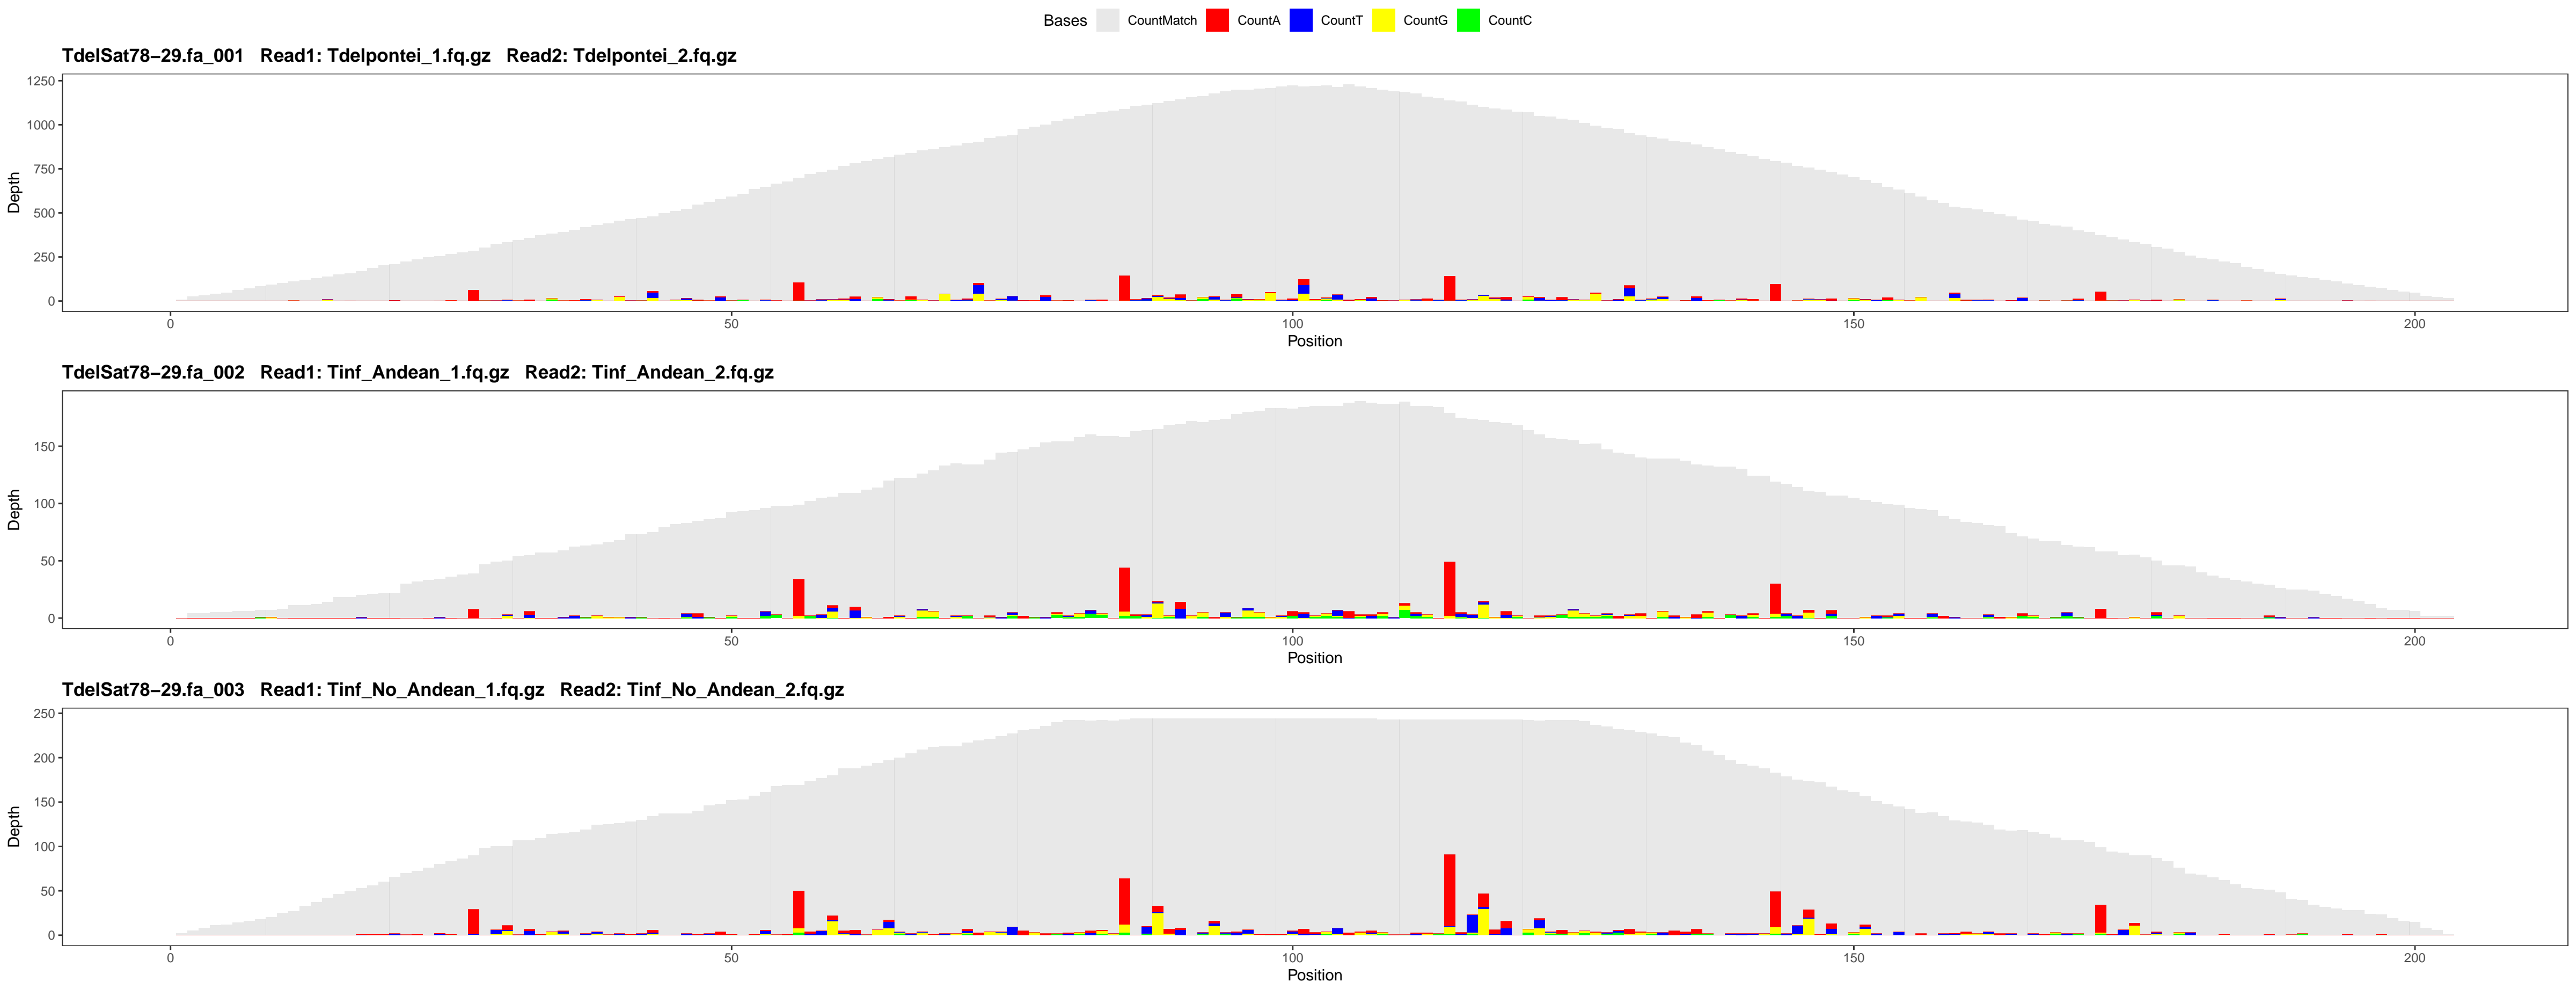



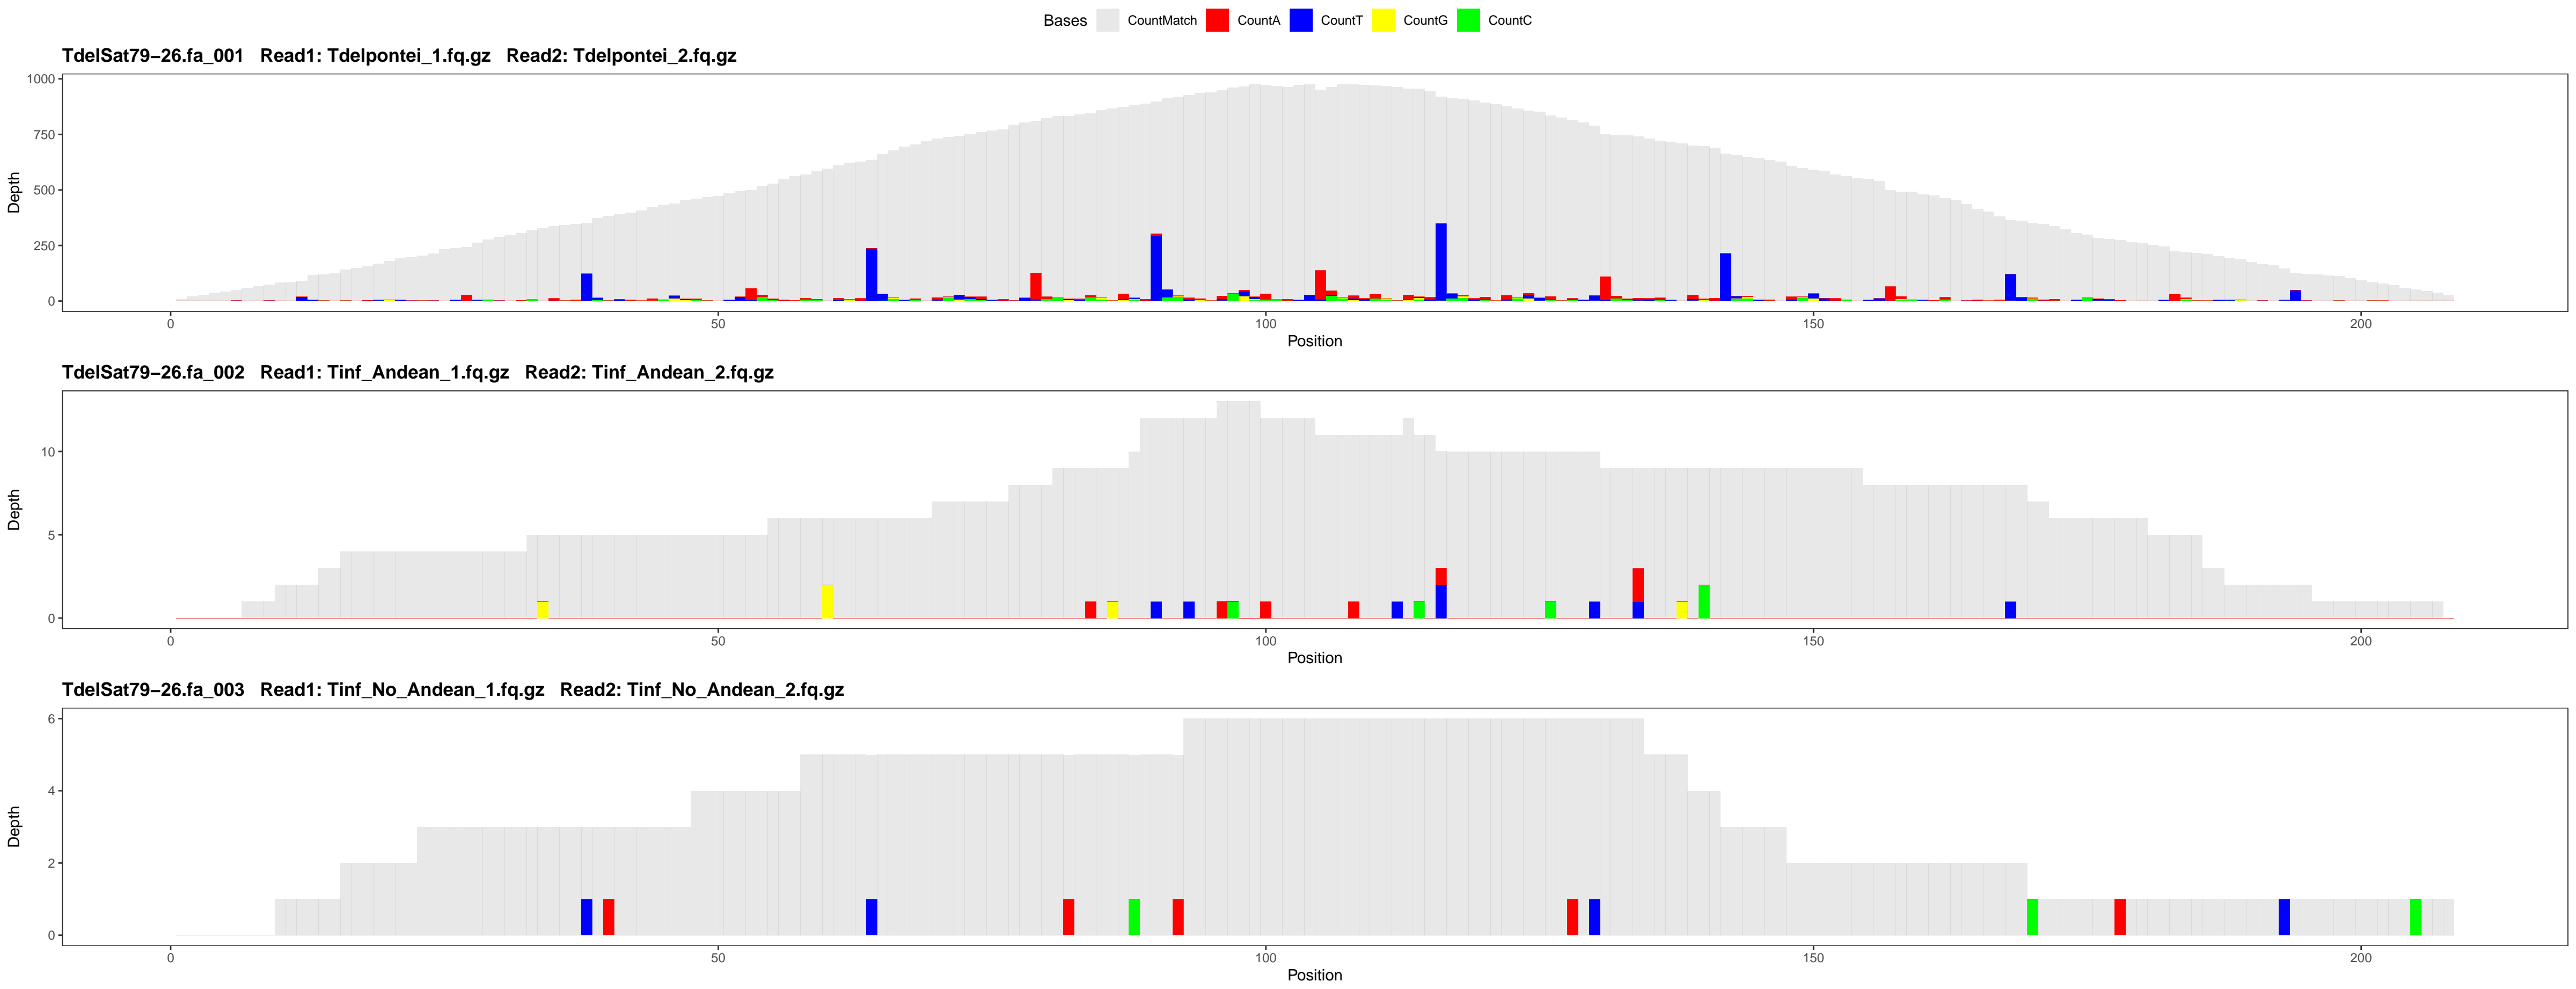

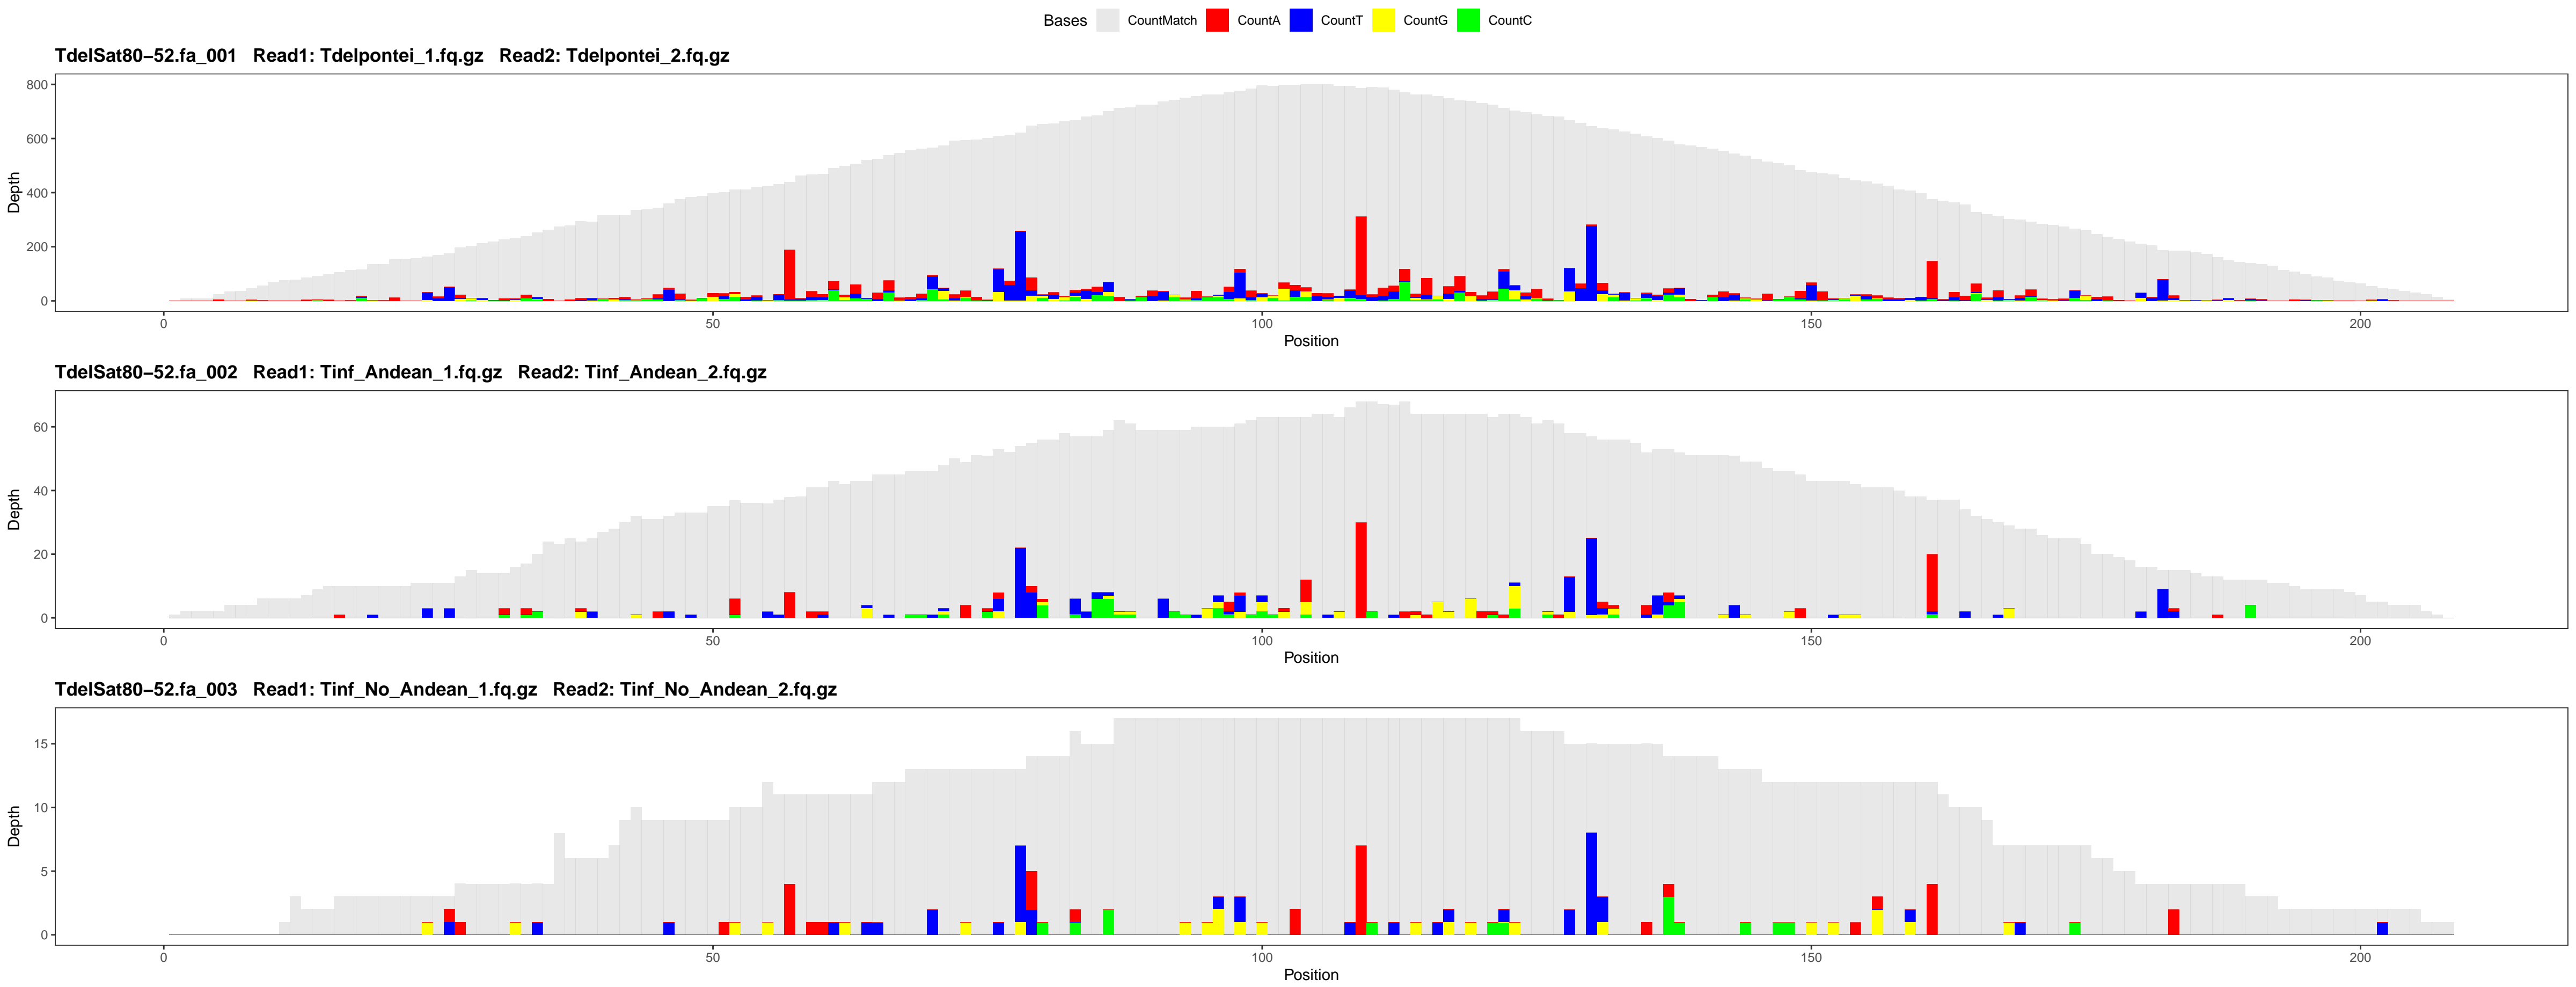

Bases CountMatch CountA CountT CountG CountC

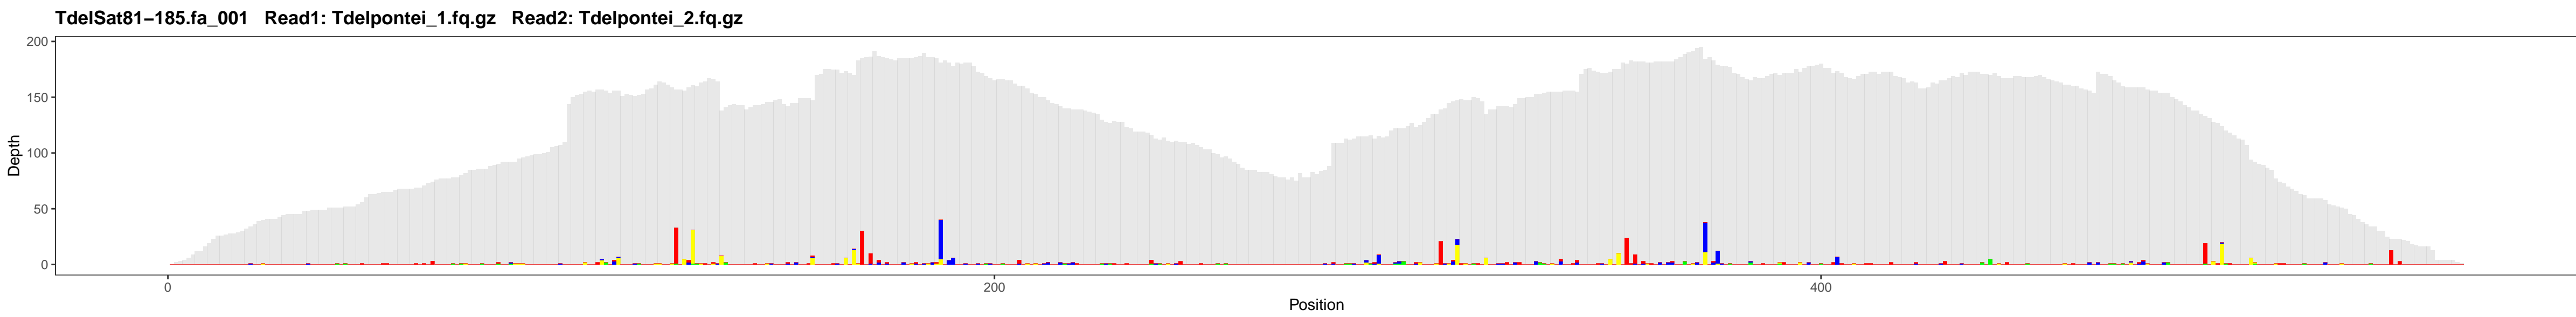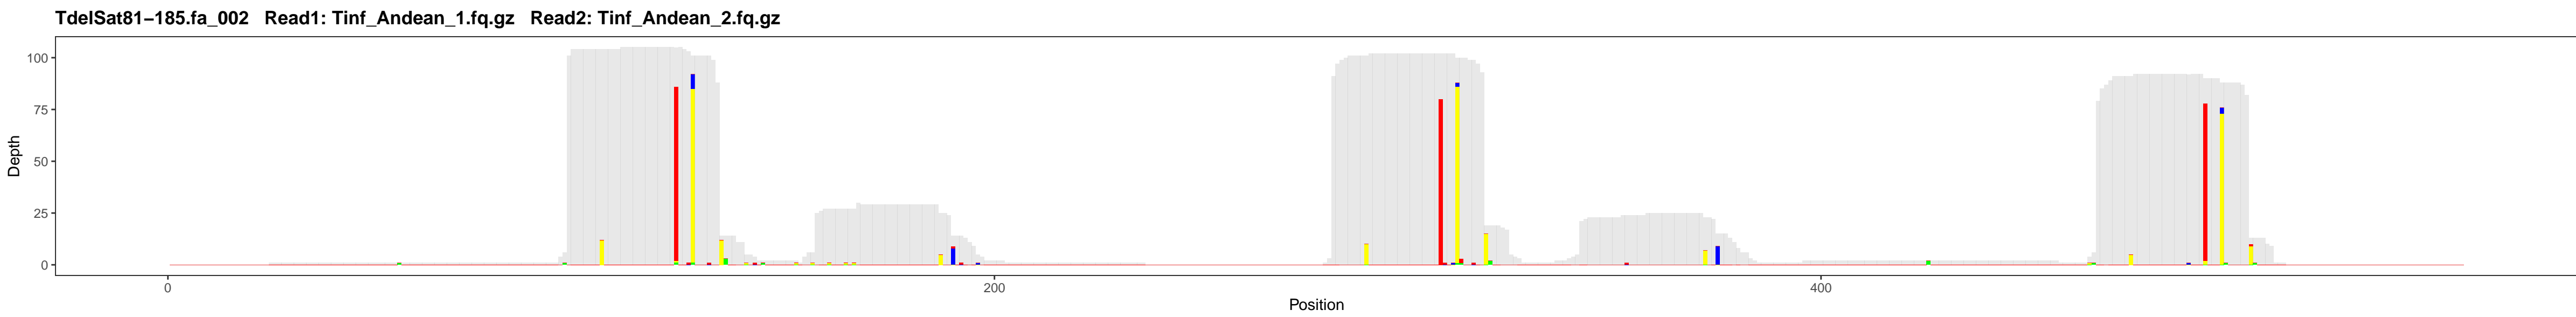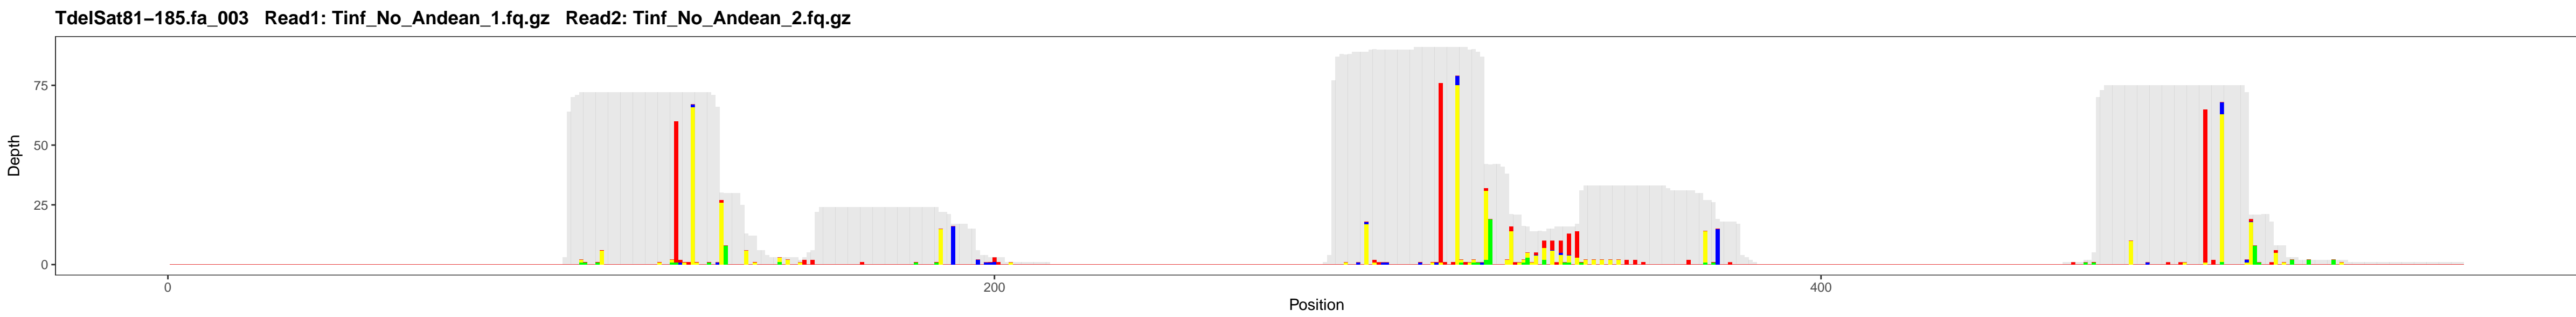

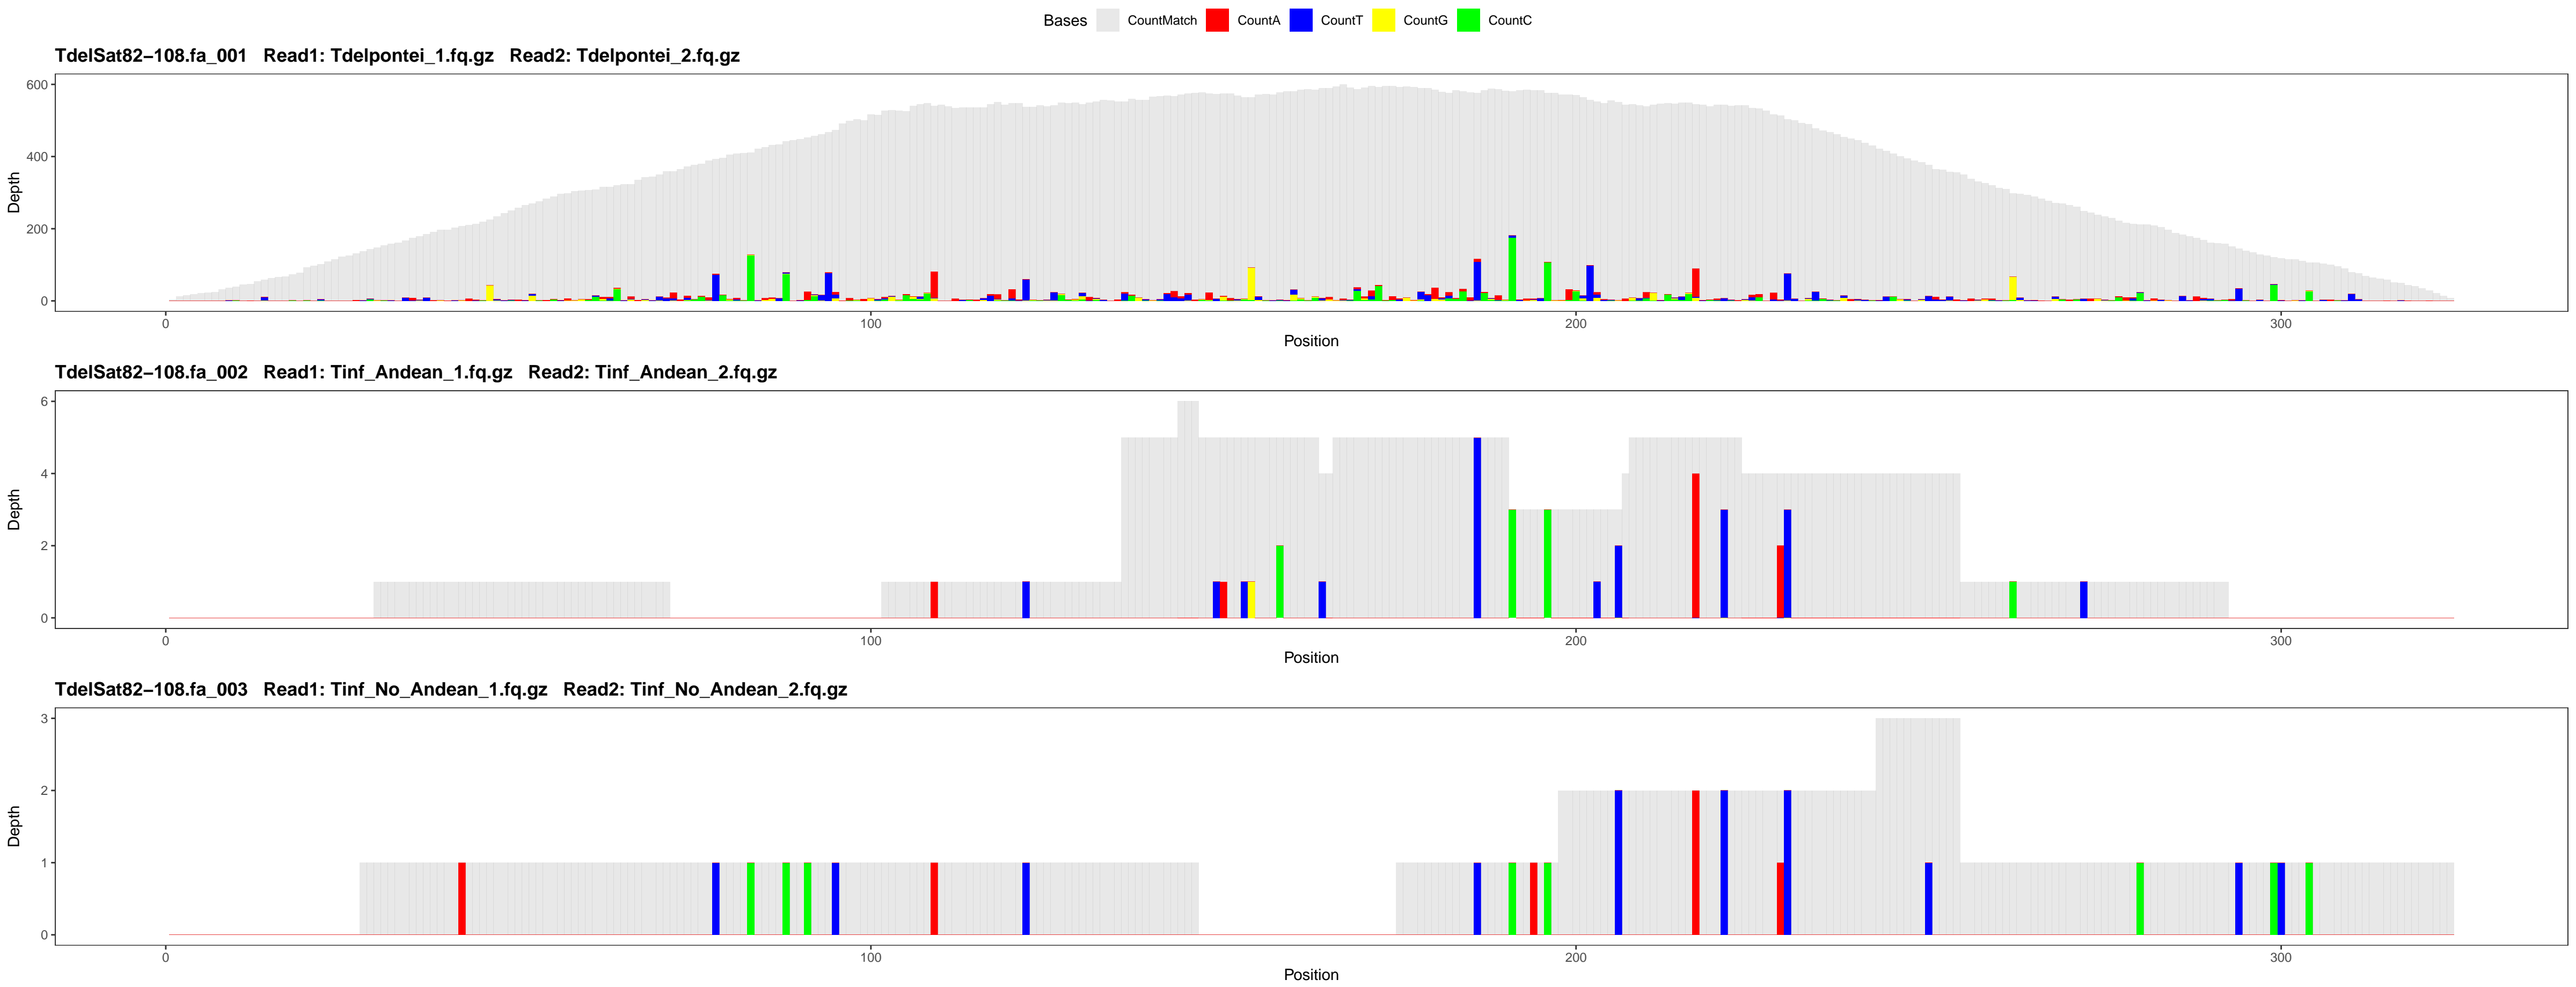

Bases CountMatch CountA CountT CountG CountC

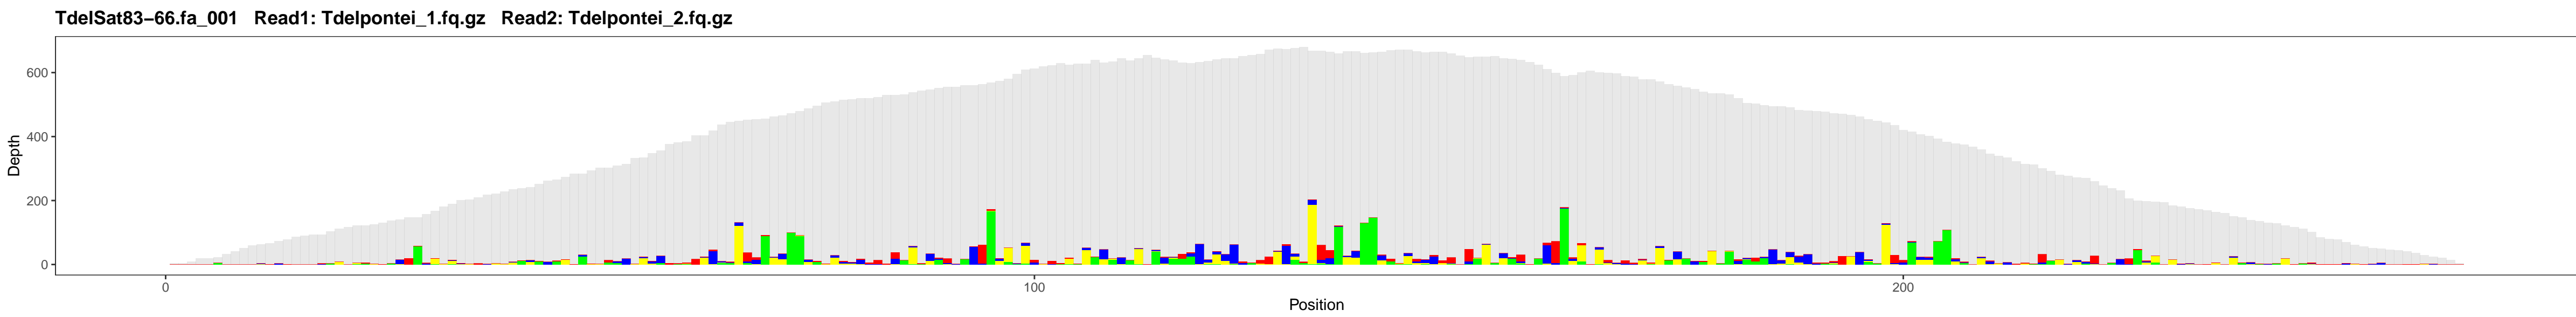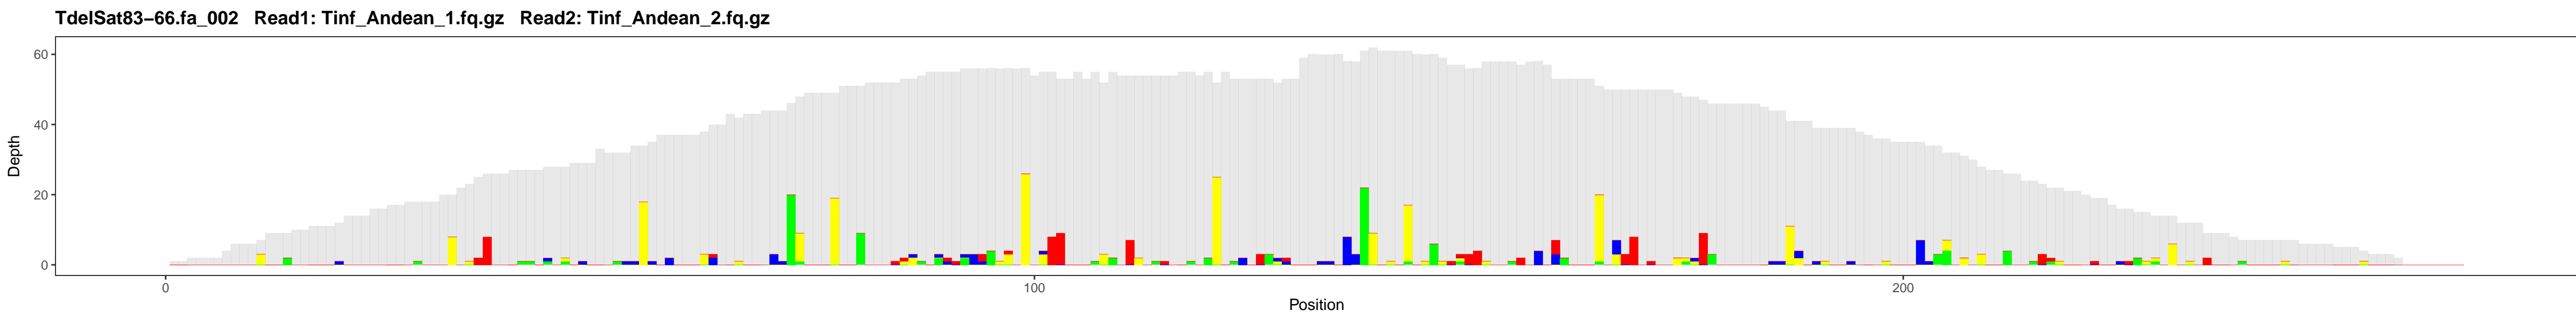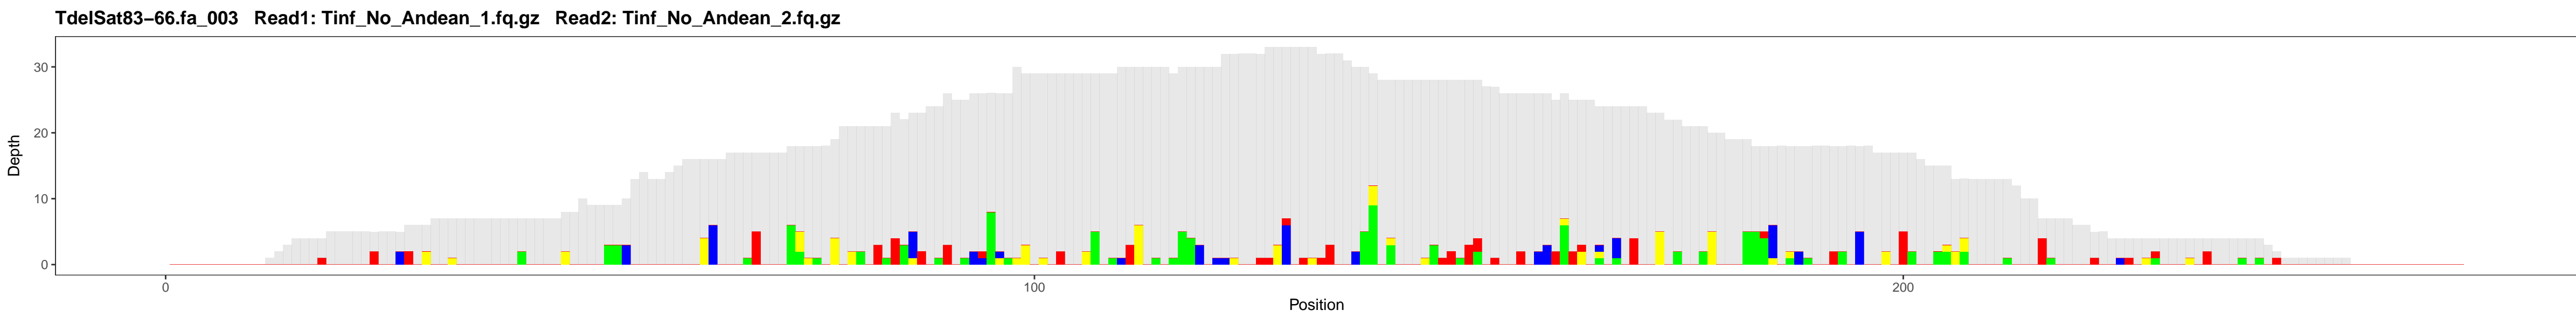

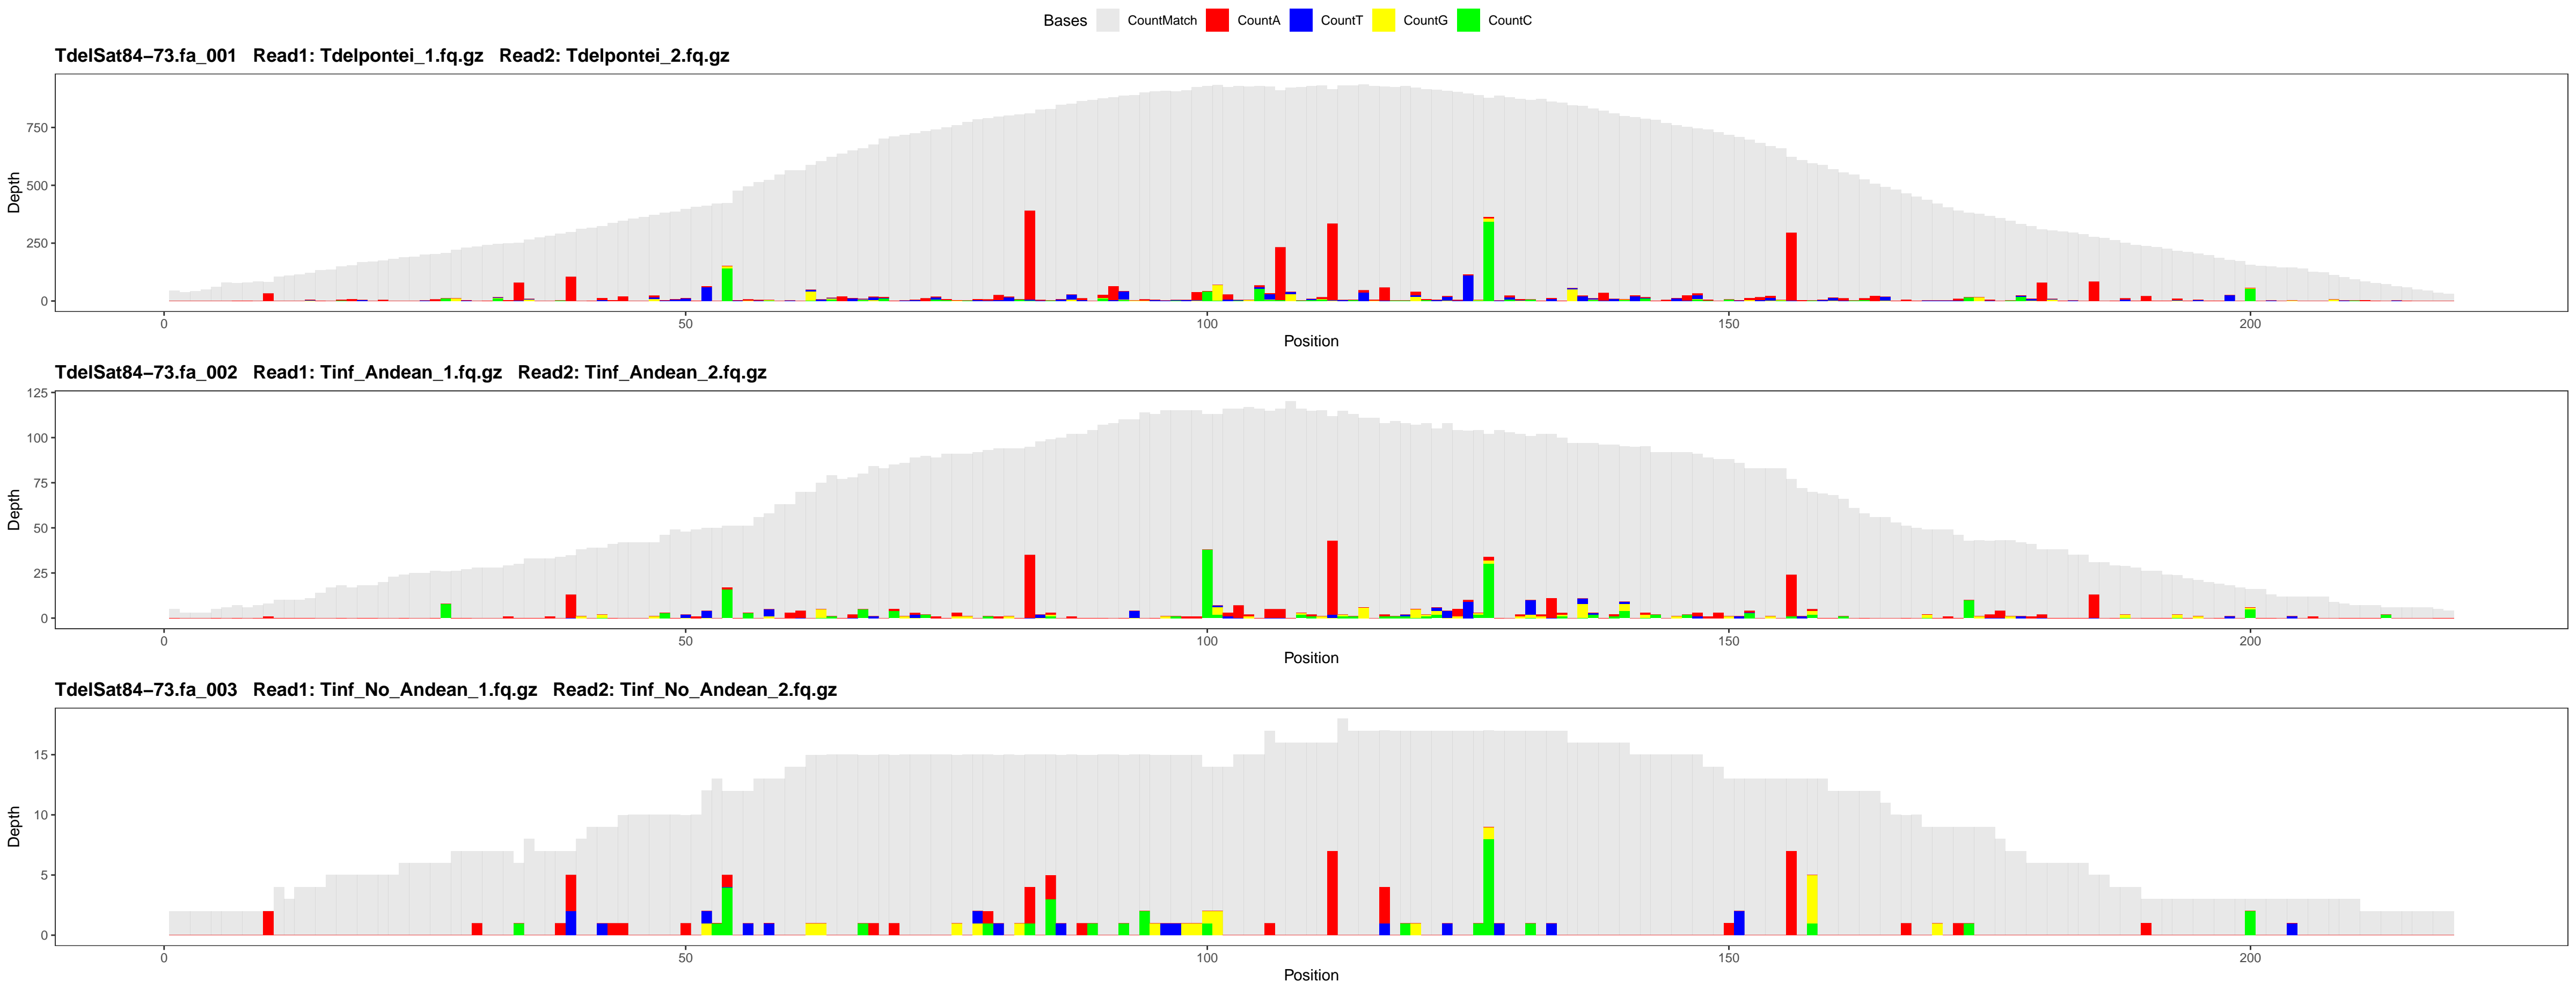

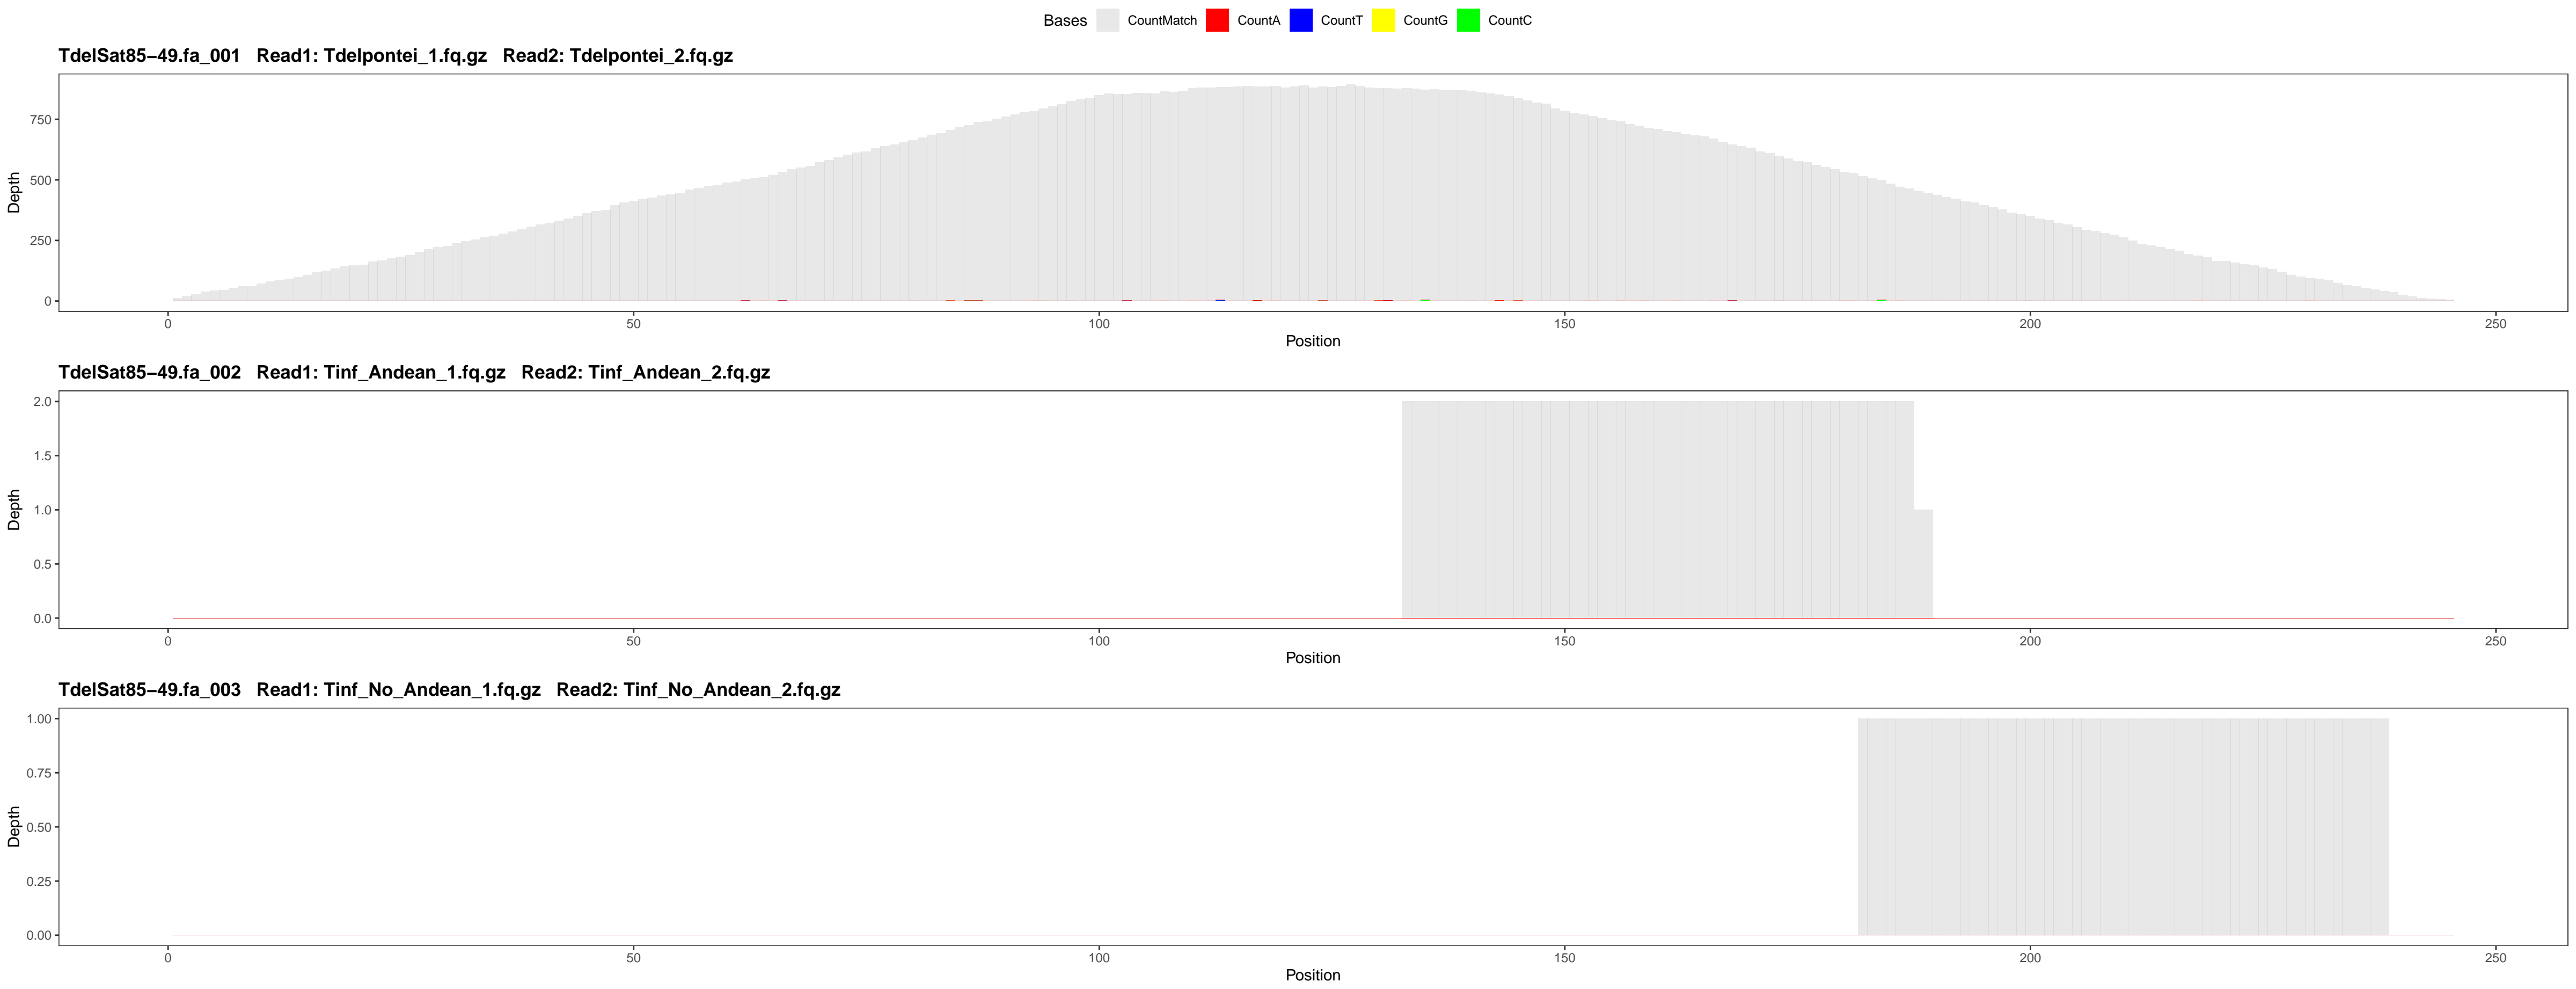

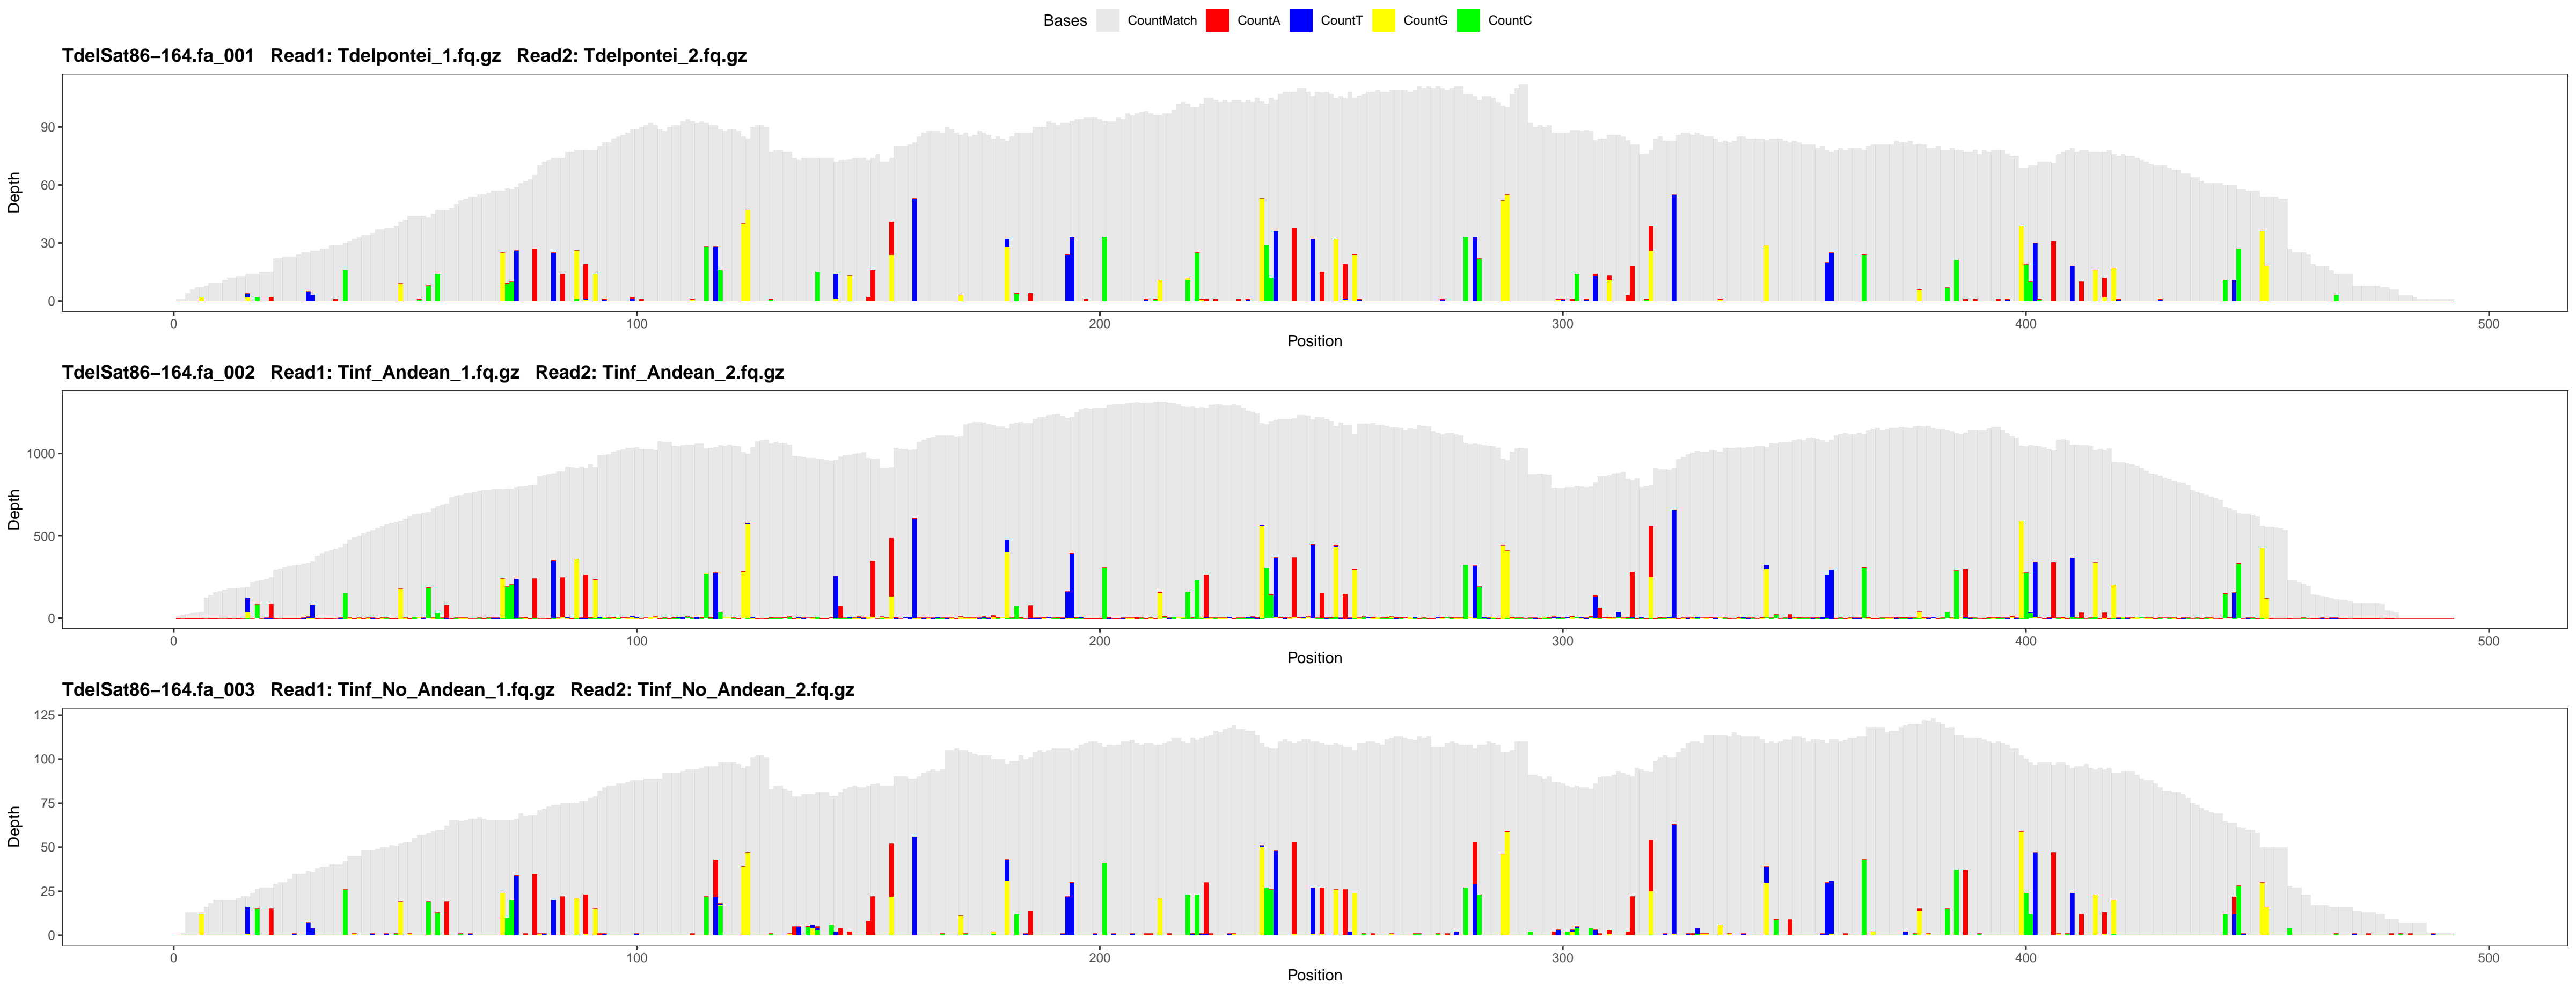



Bases  CountMatch  CountA  CountT  CountG  CountC

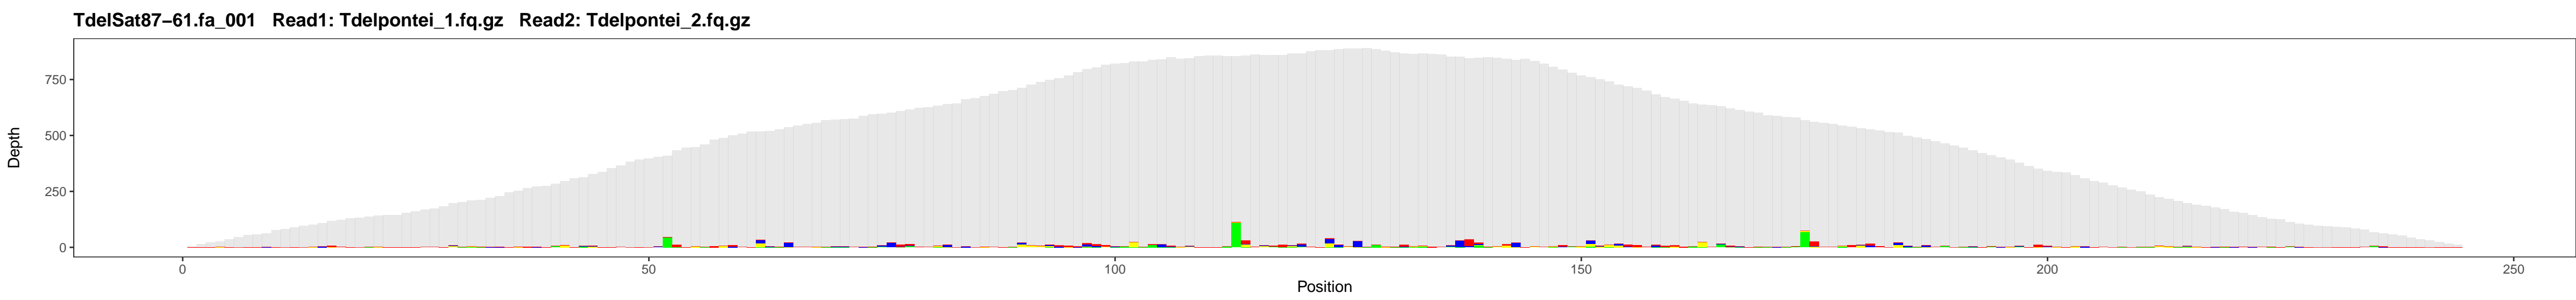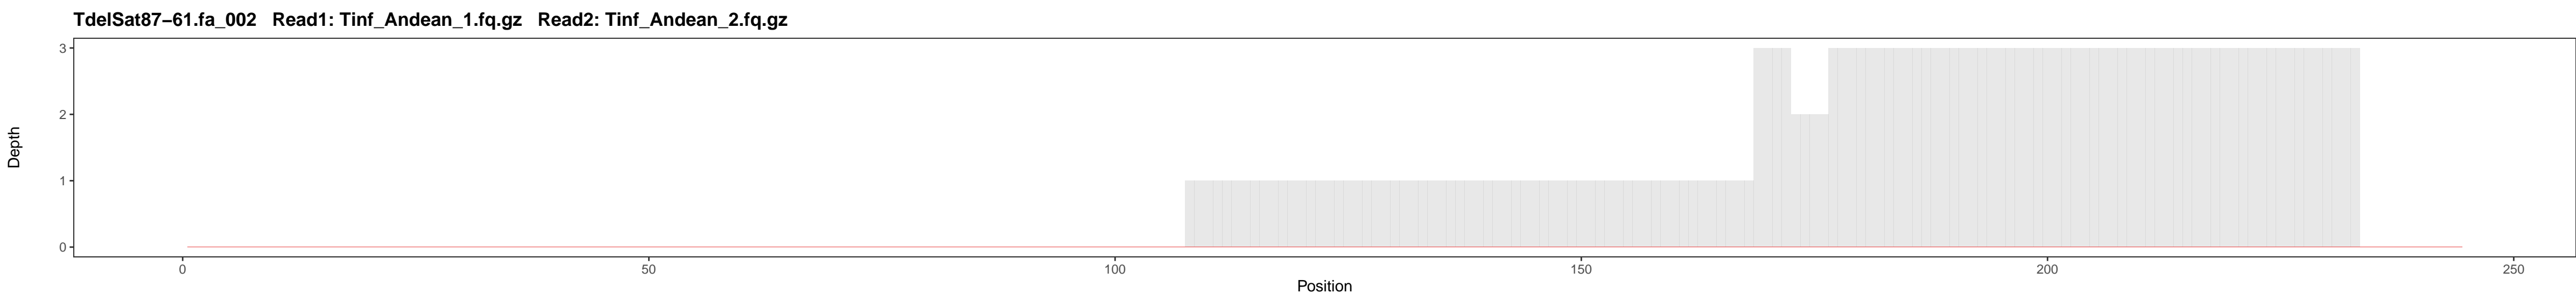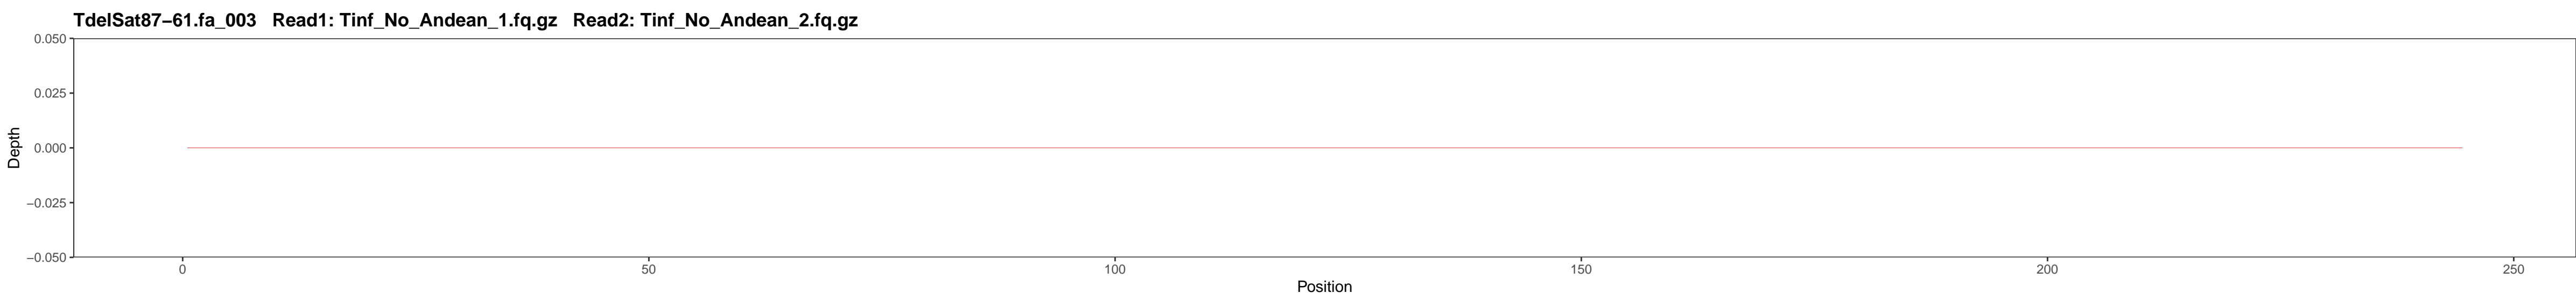

This graph has no coverage.

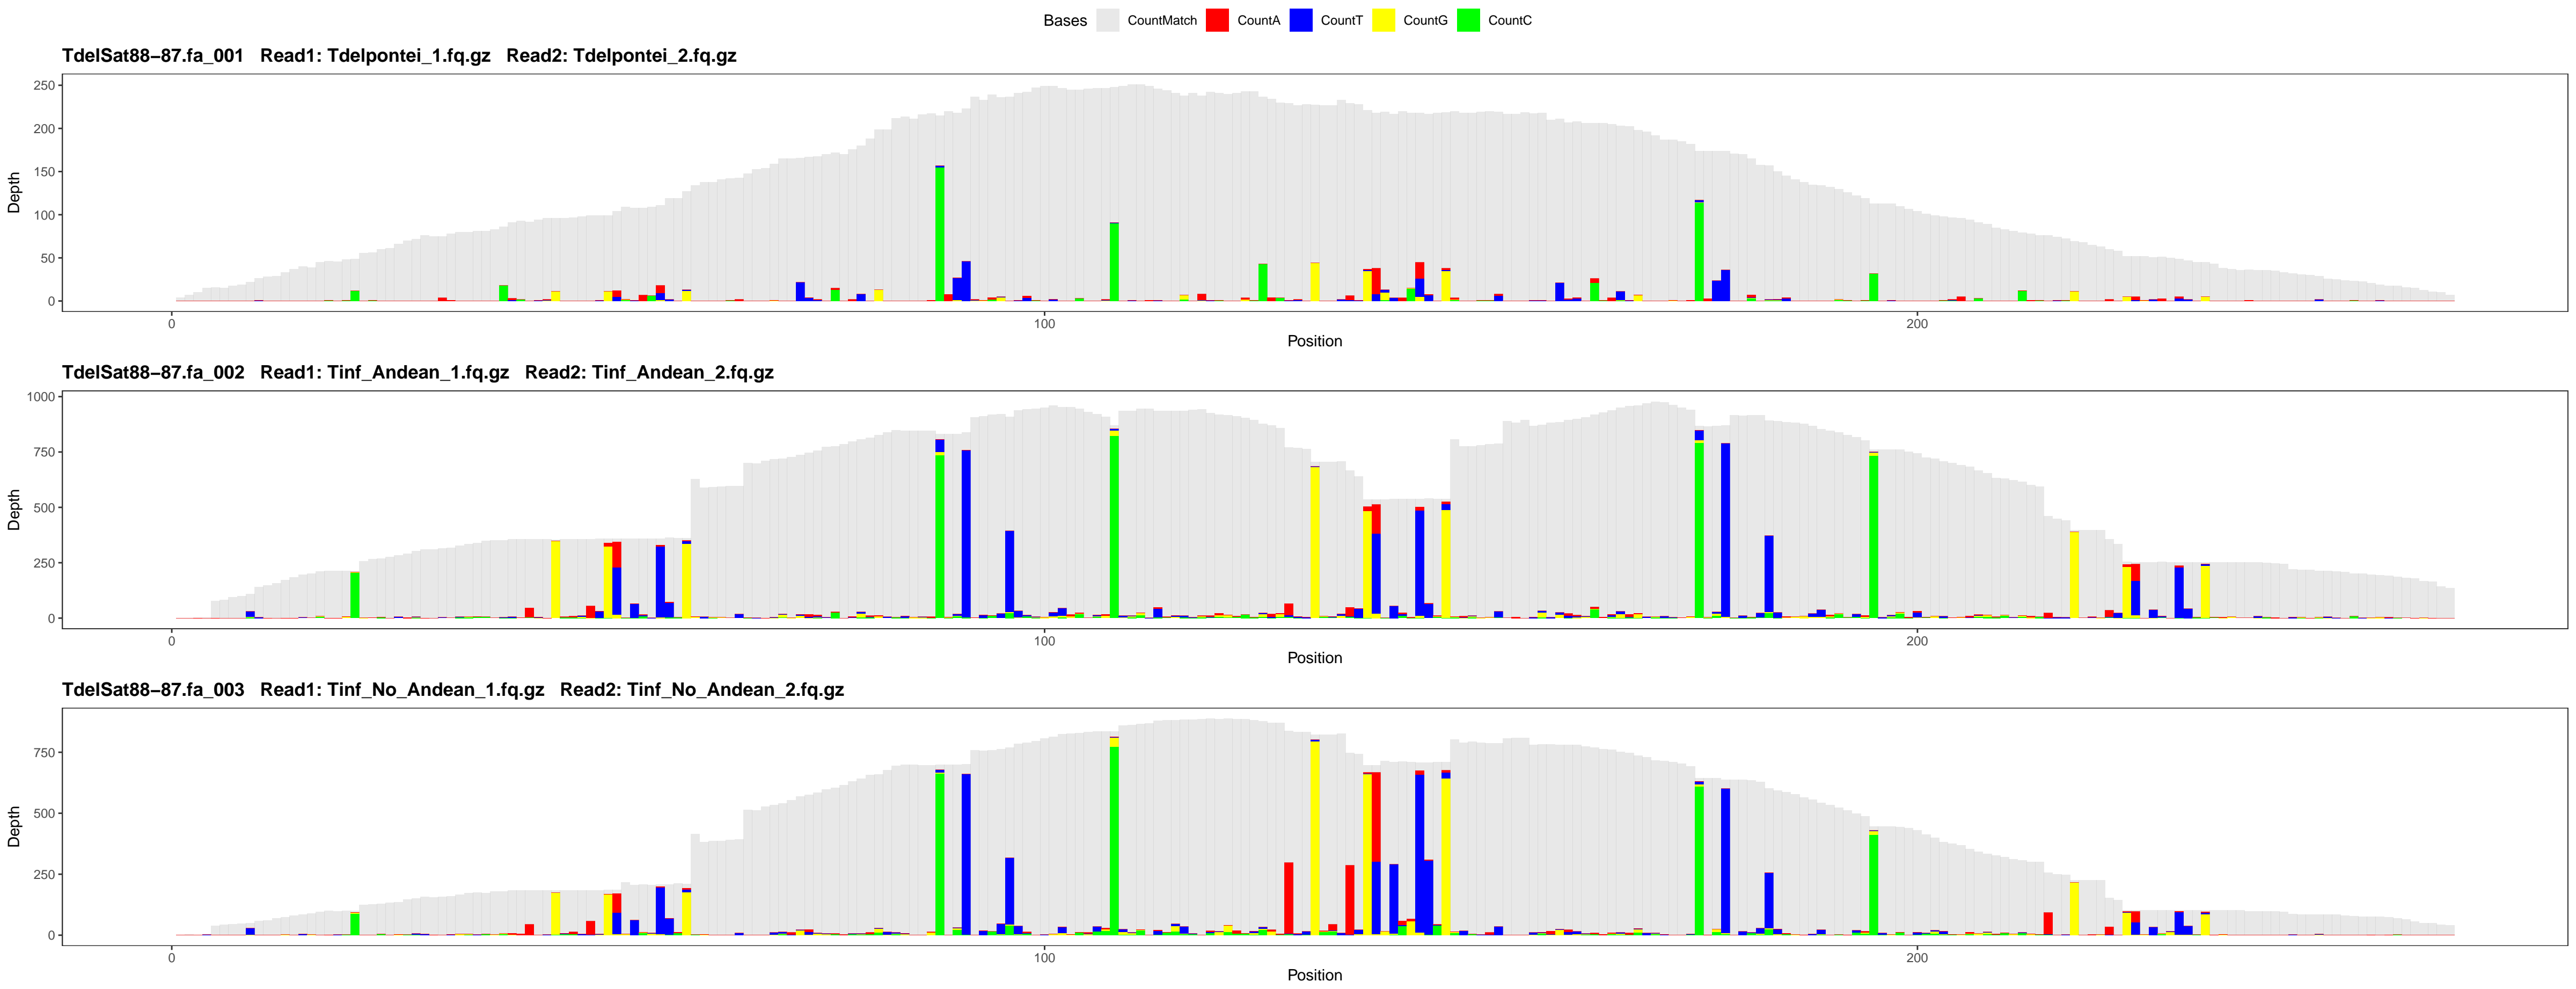

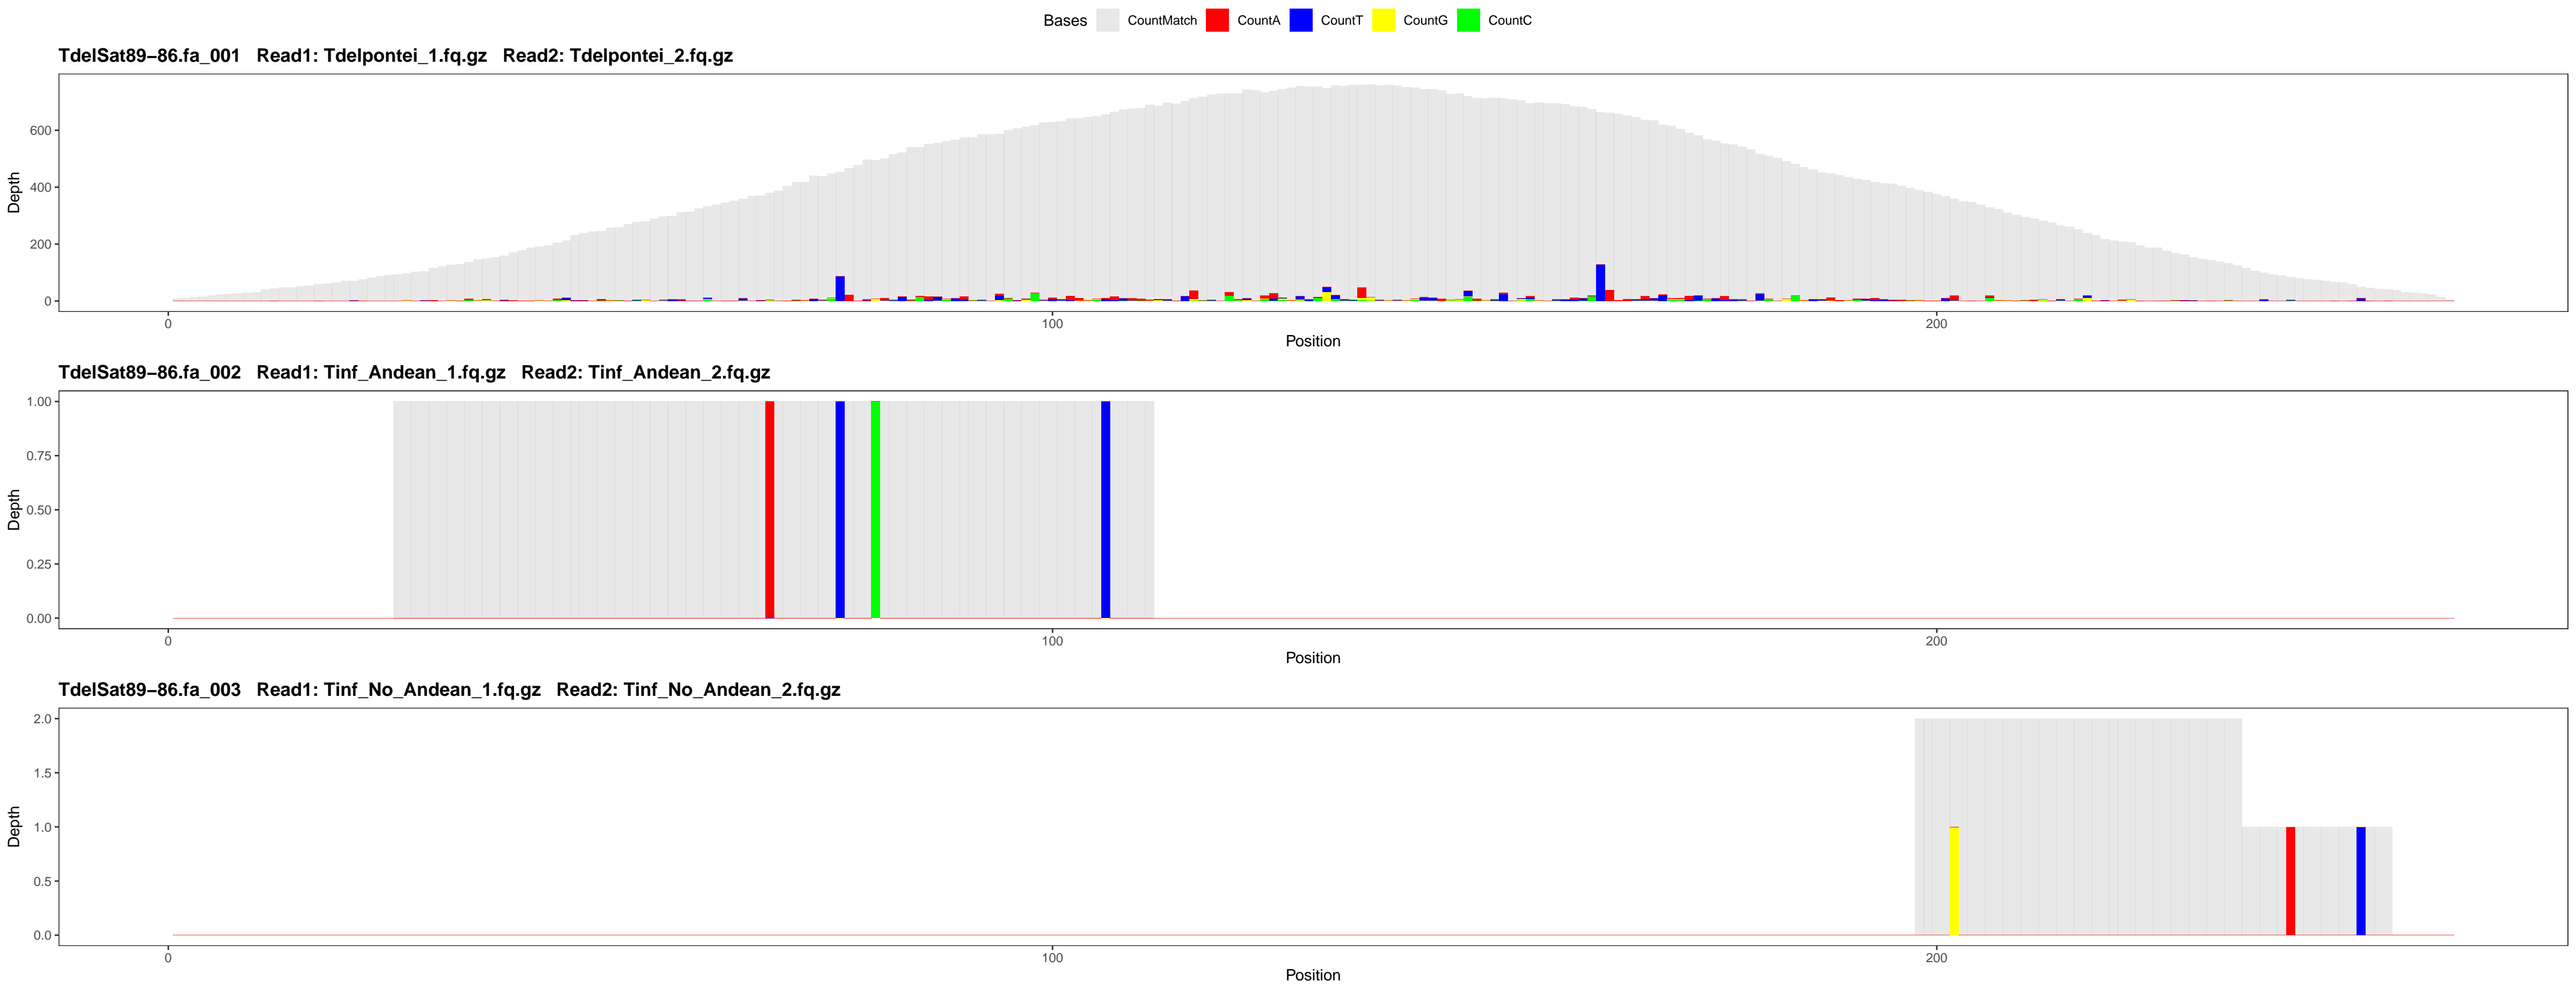

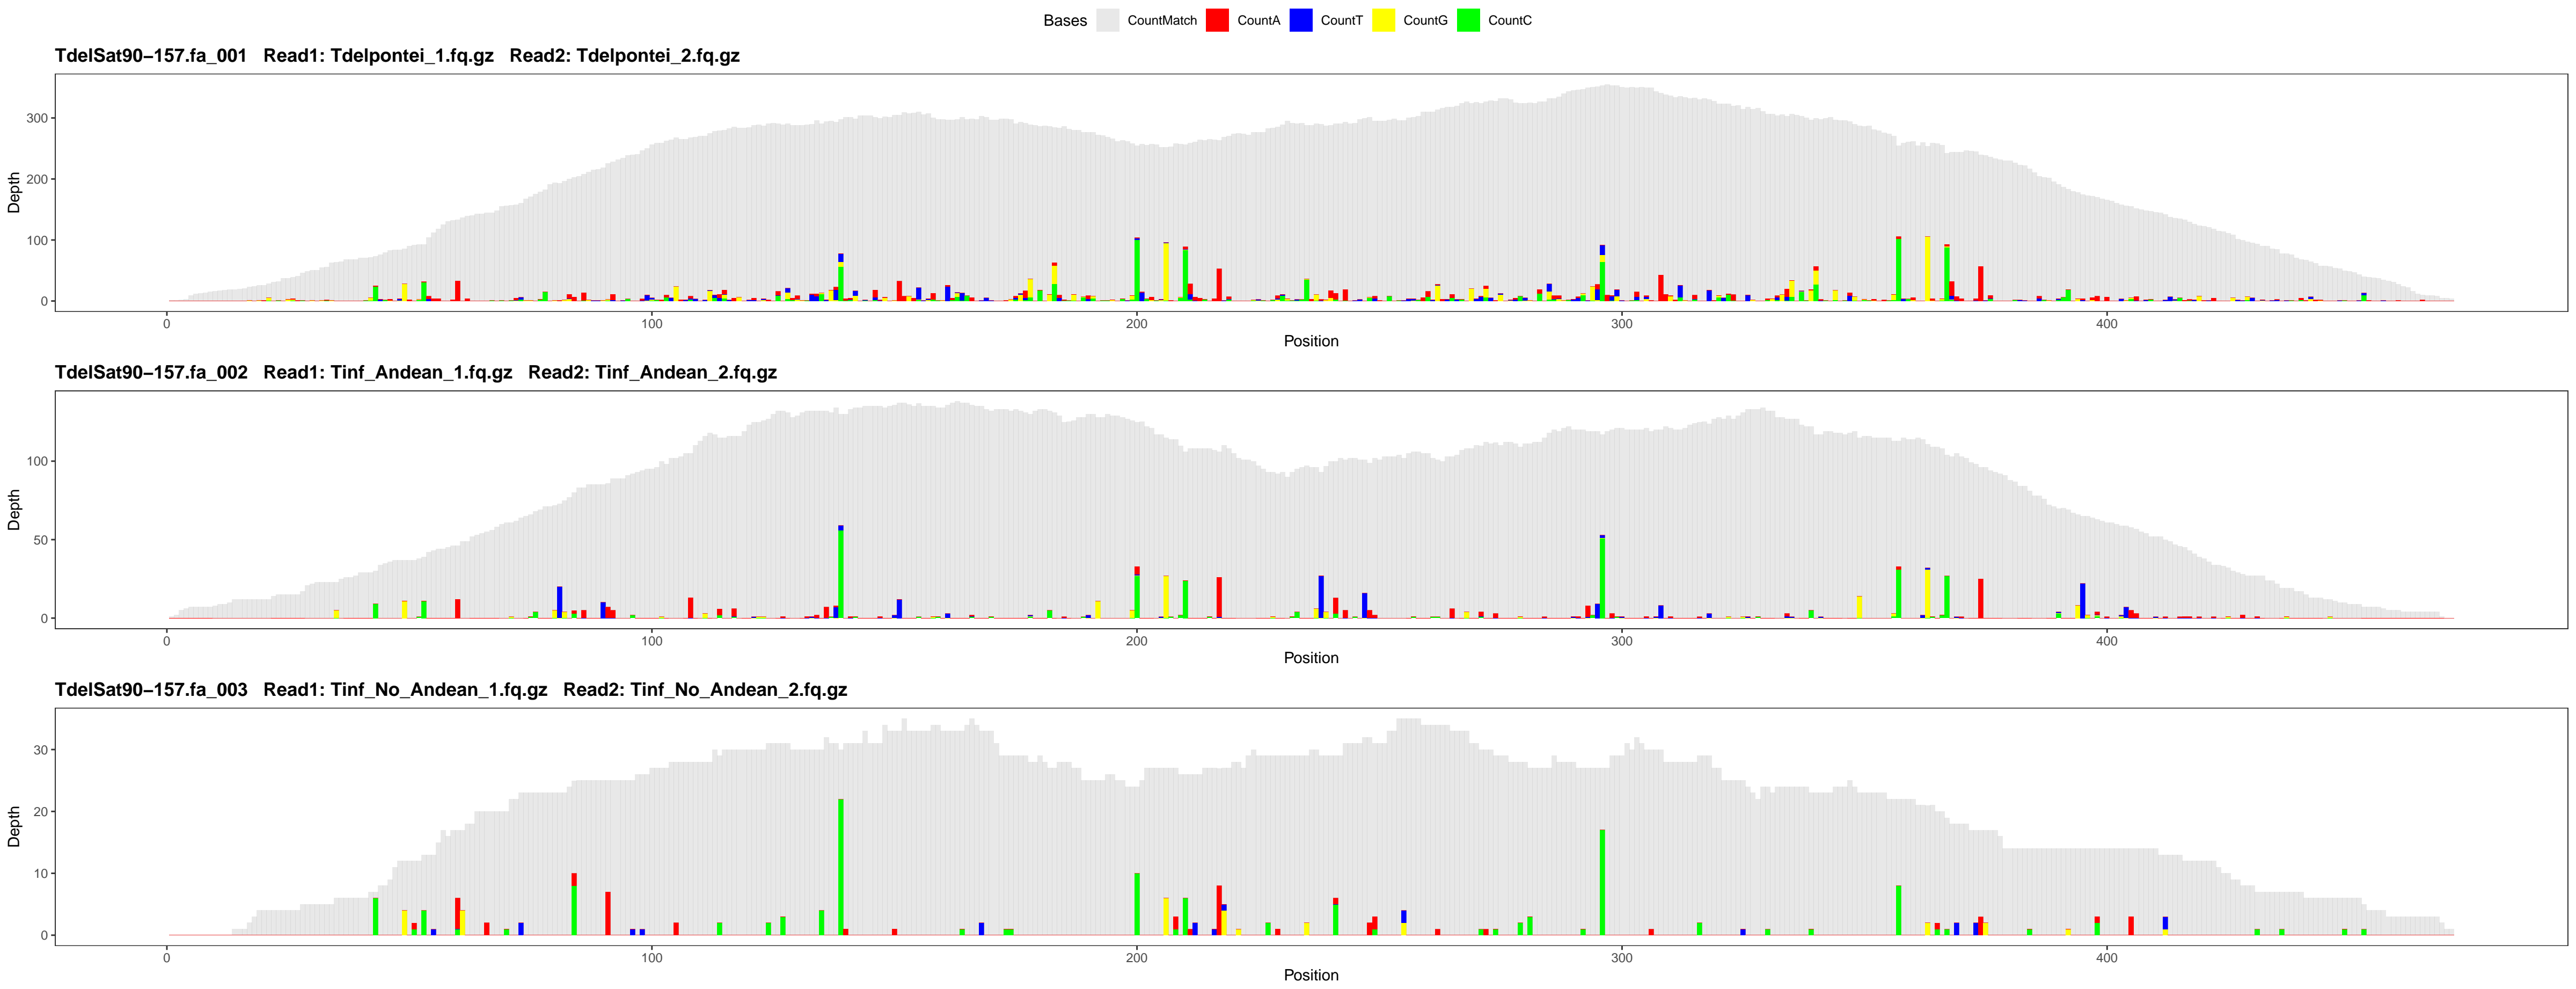

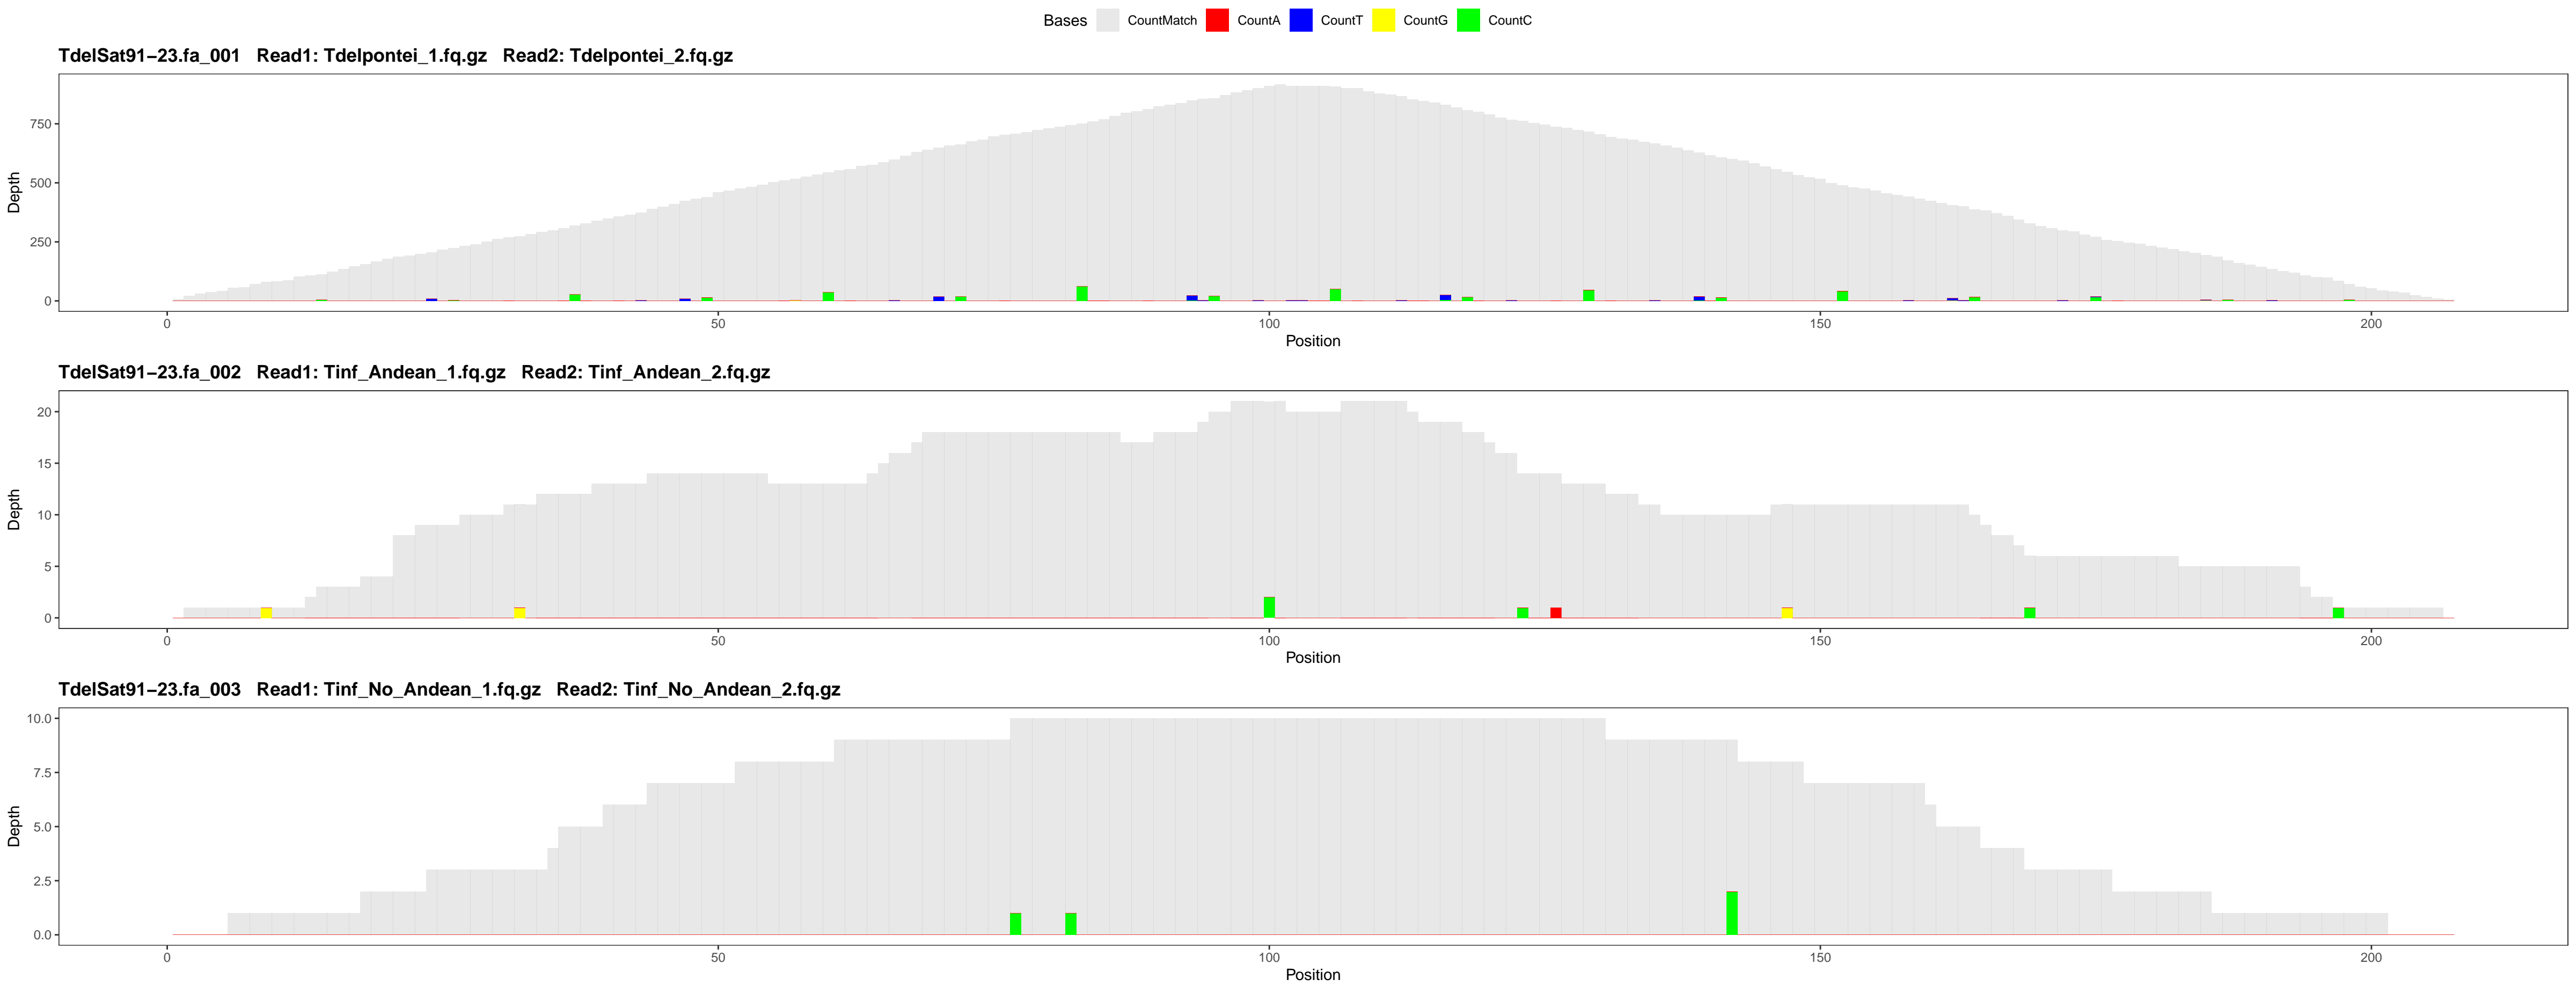

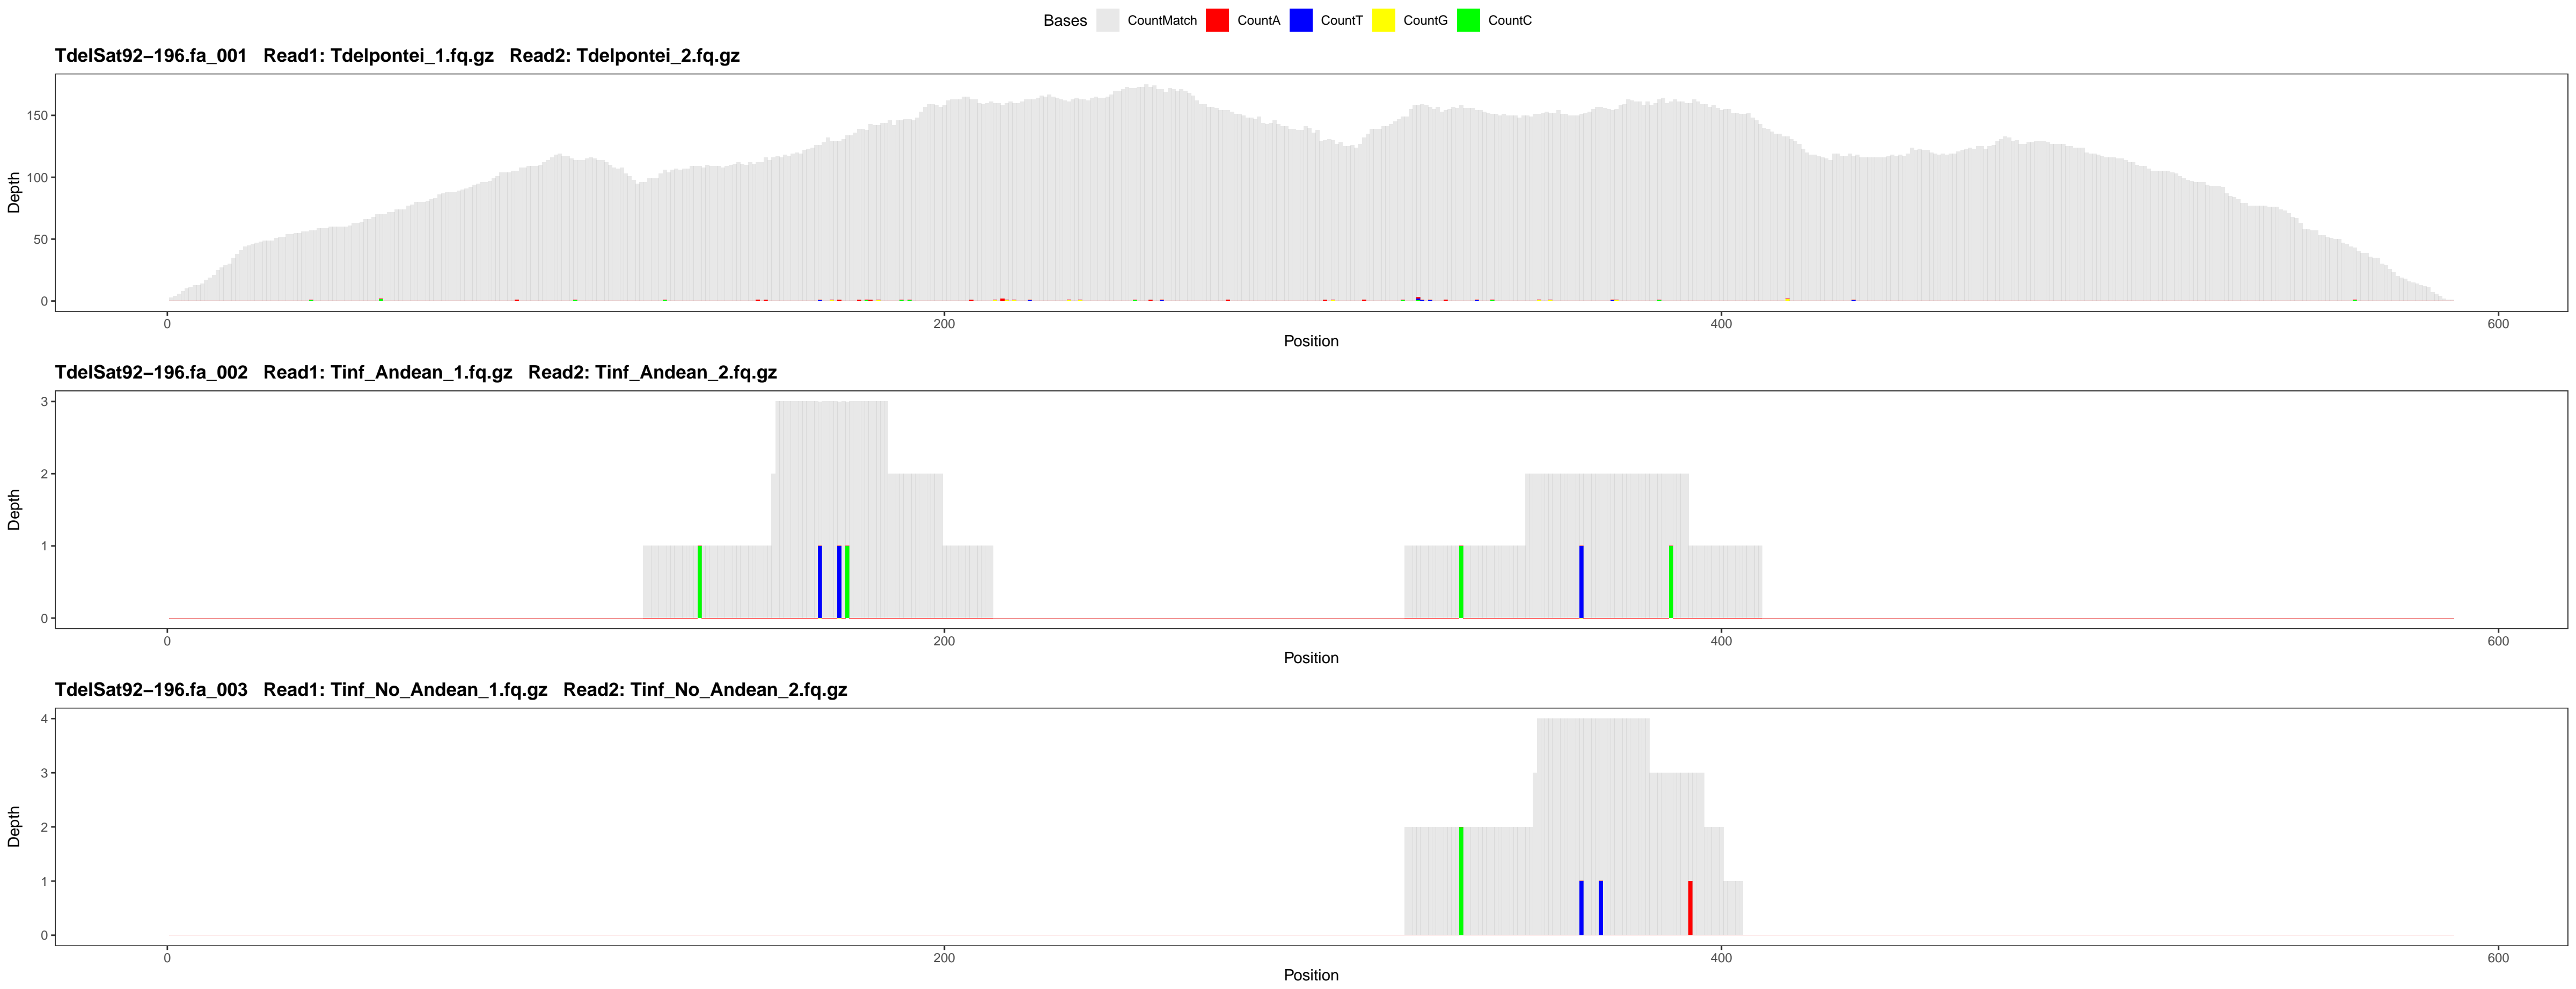

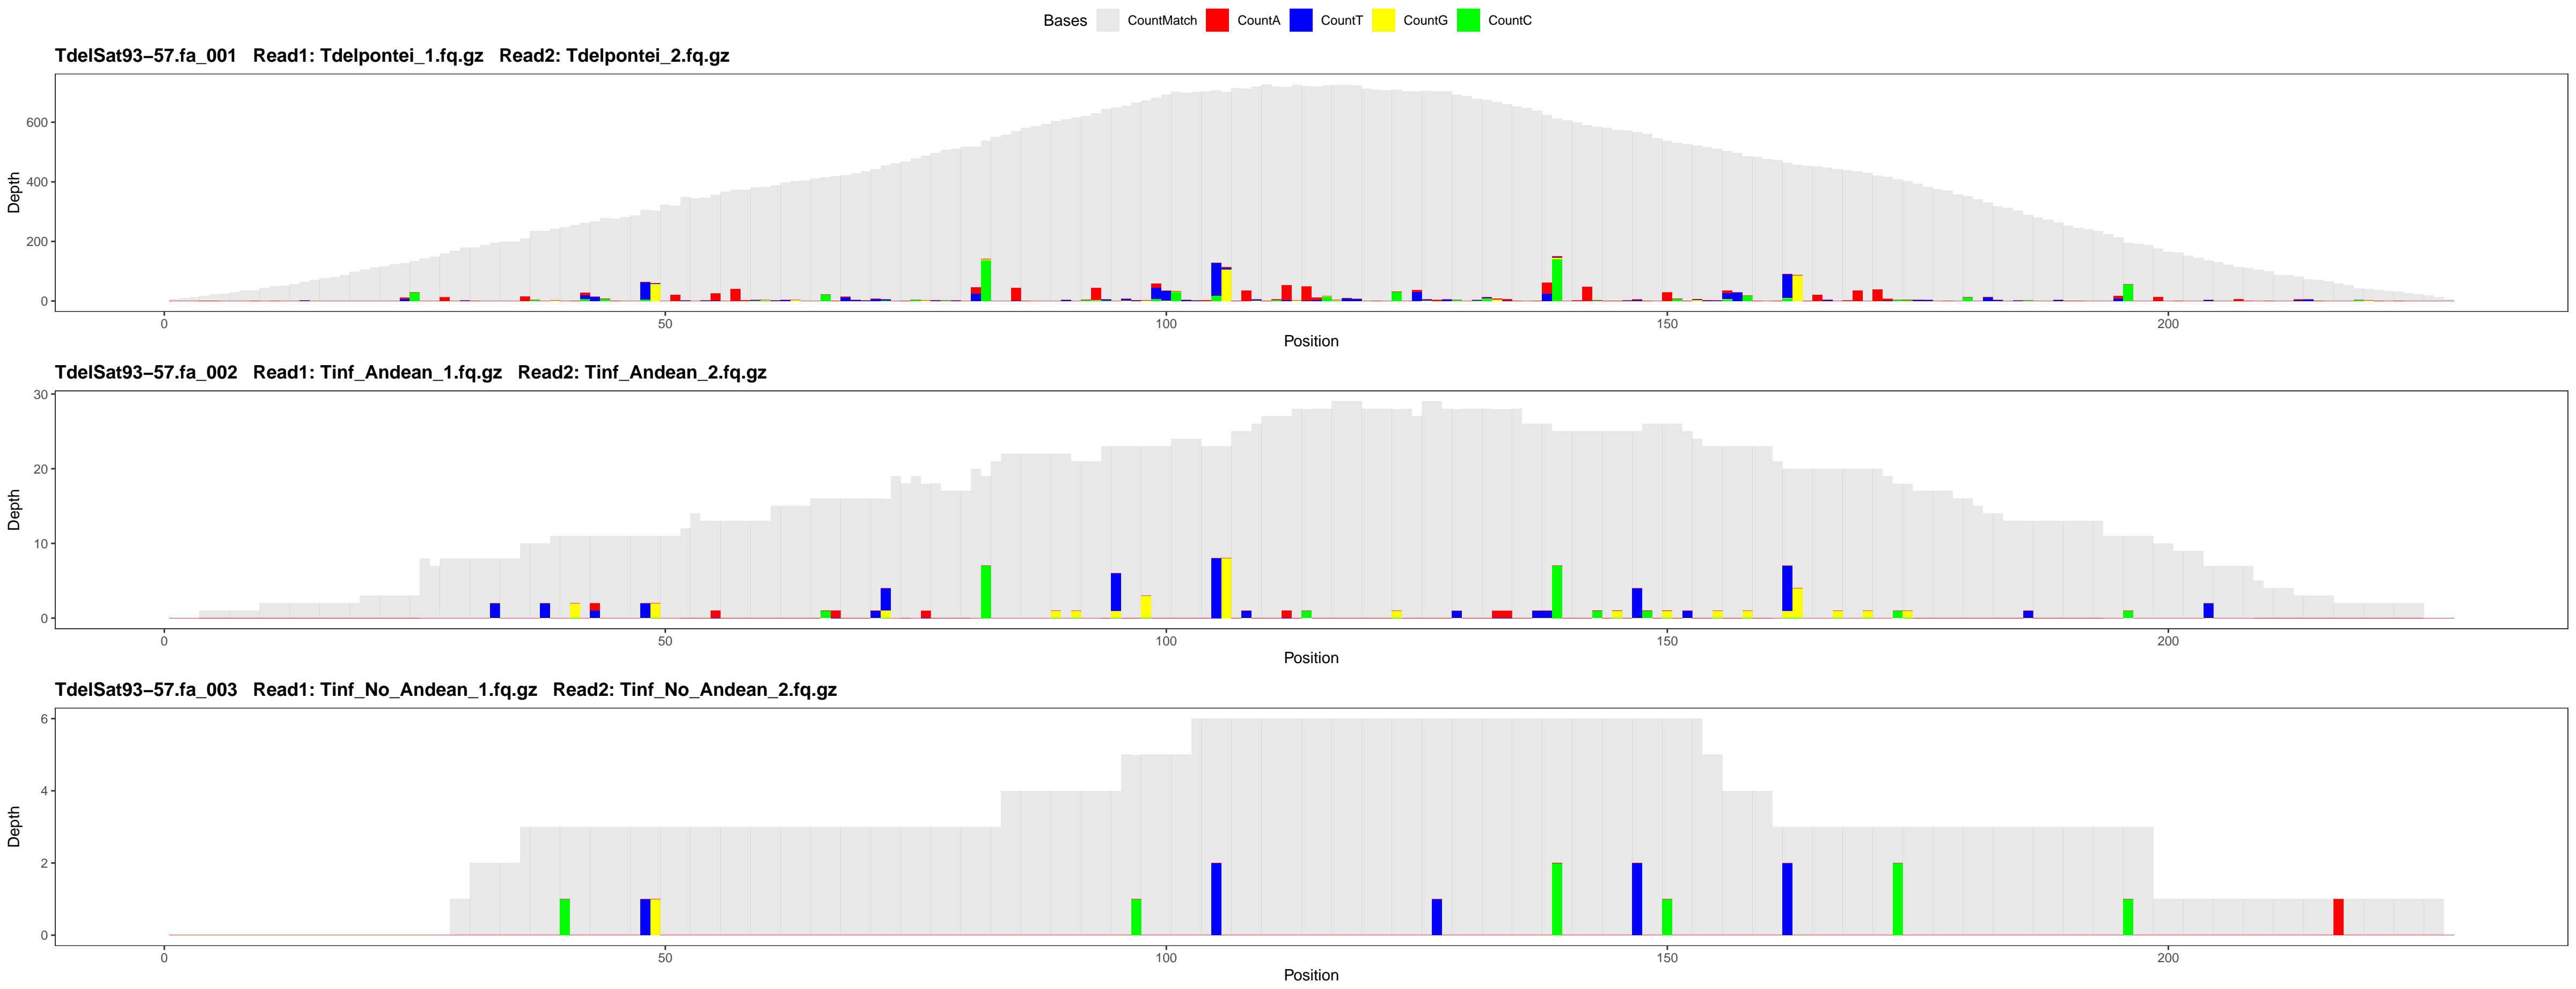

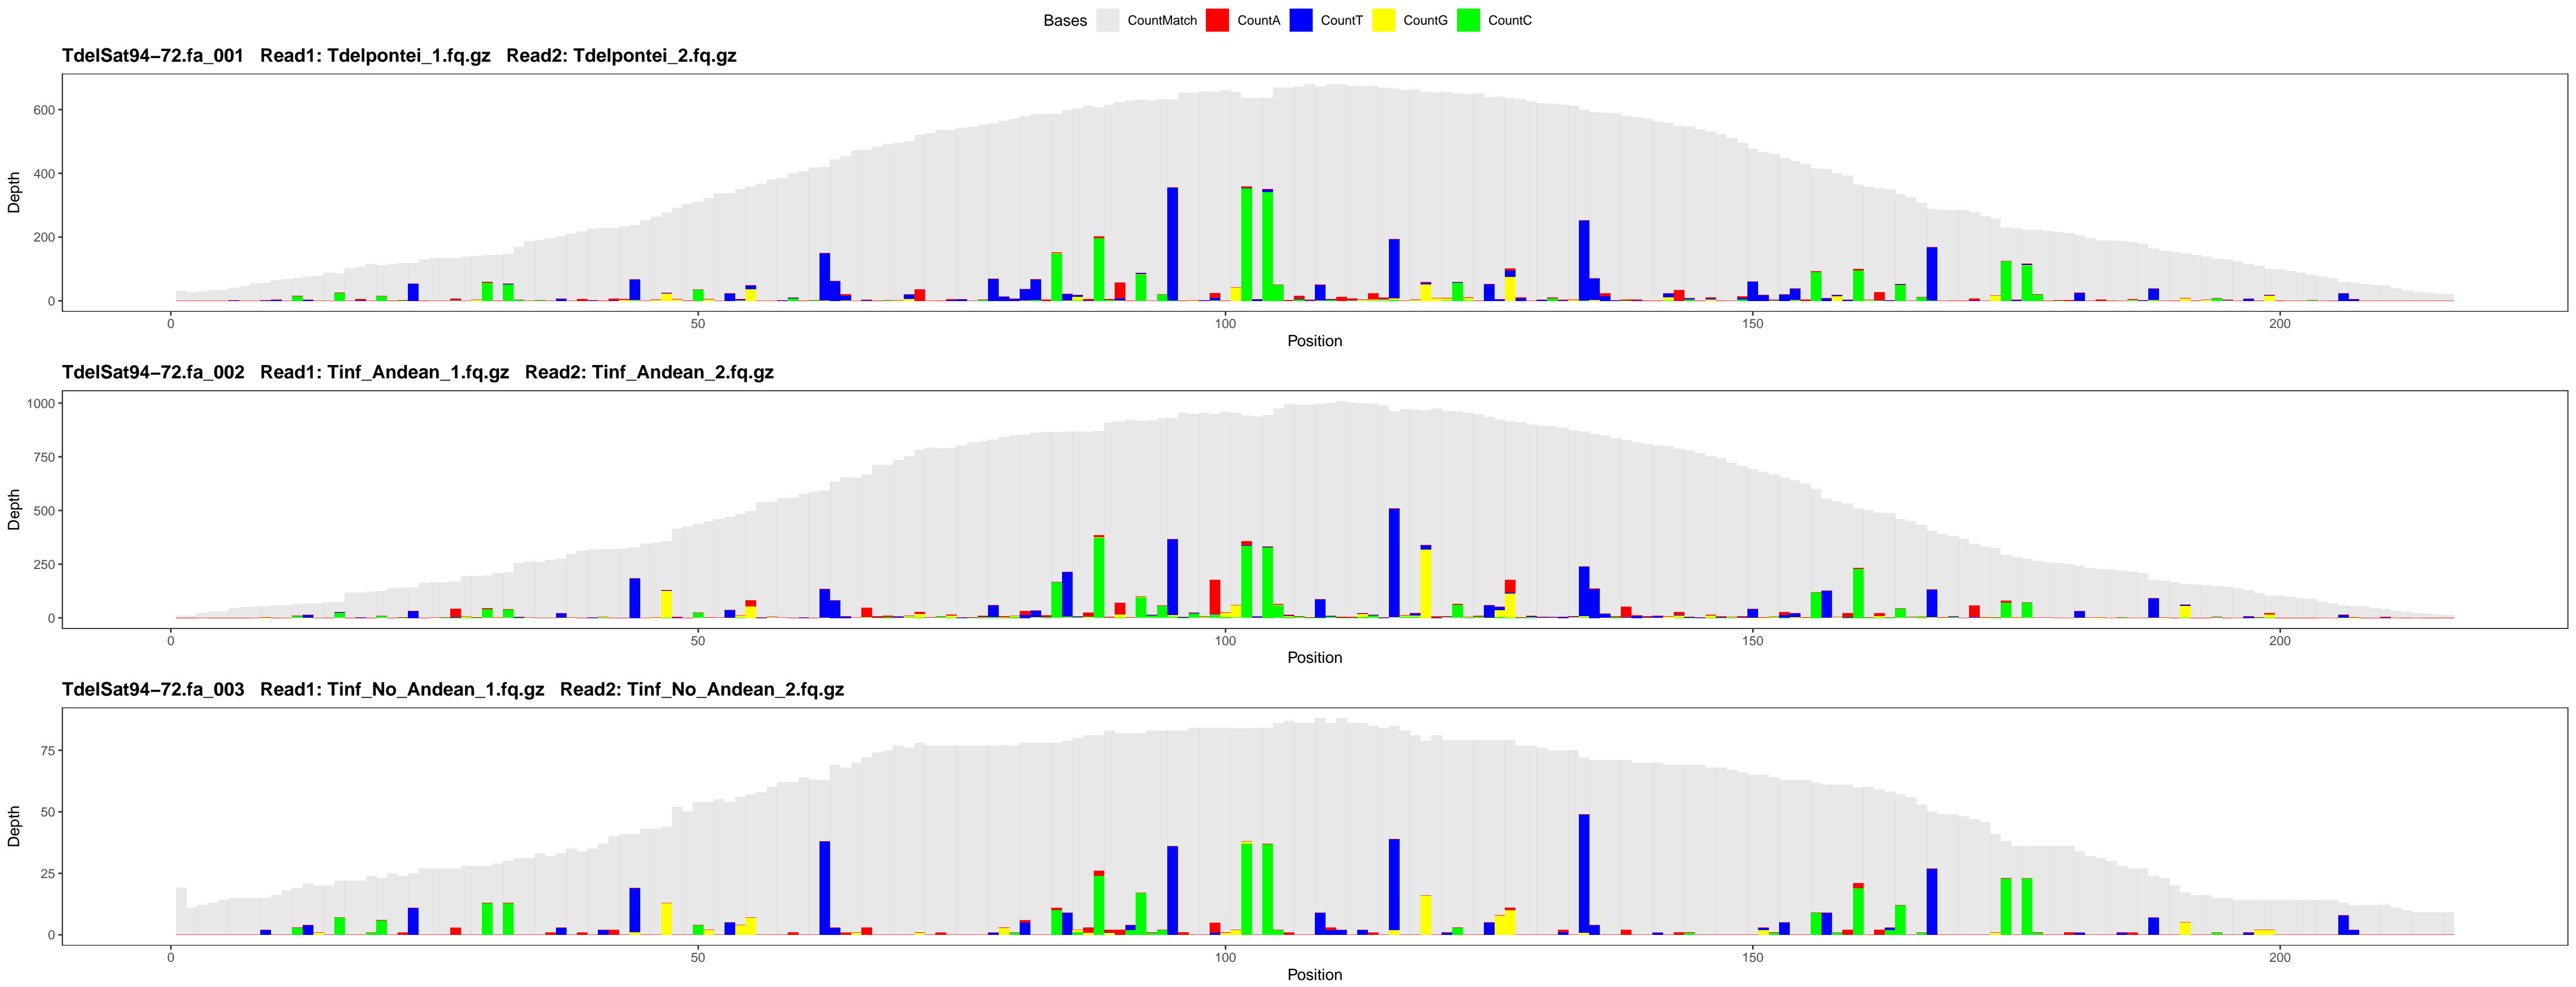



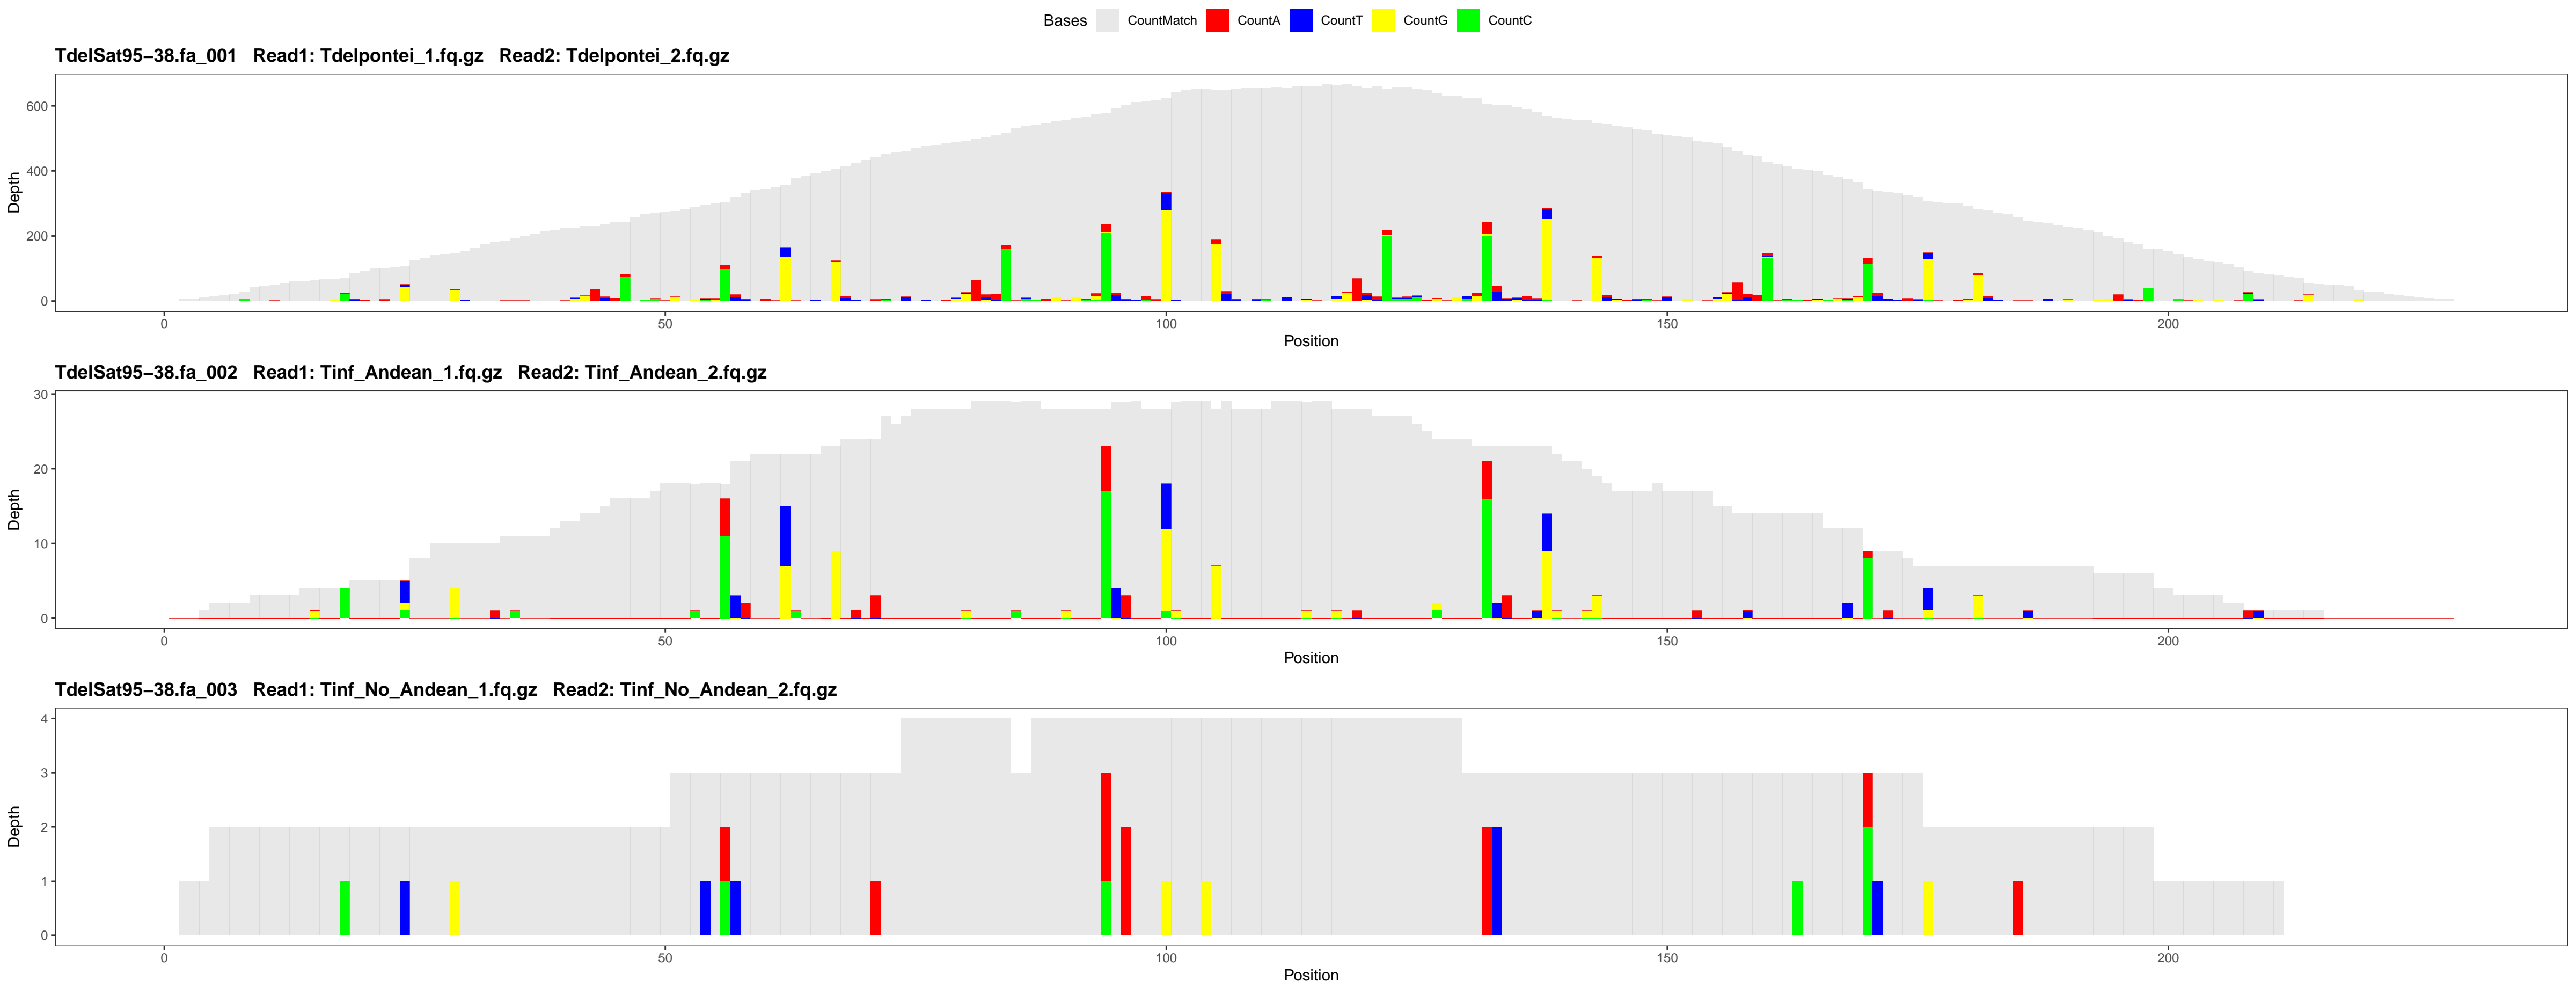

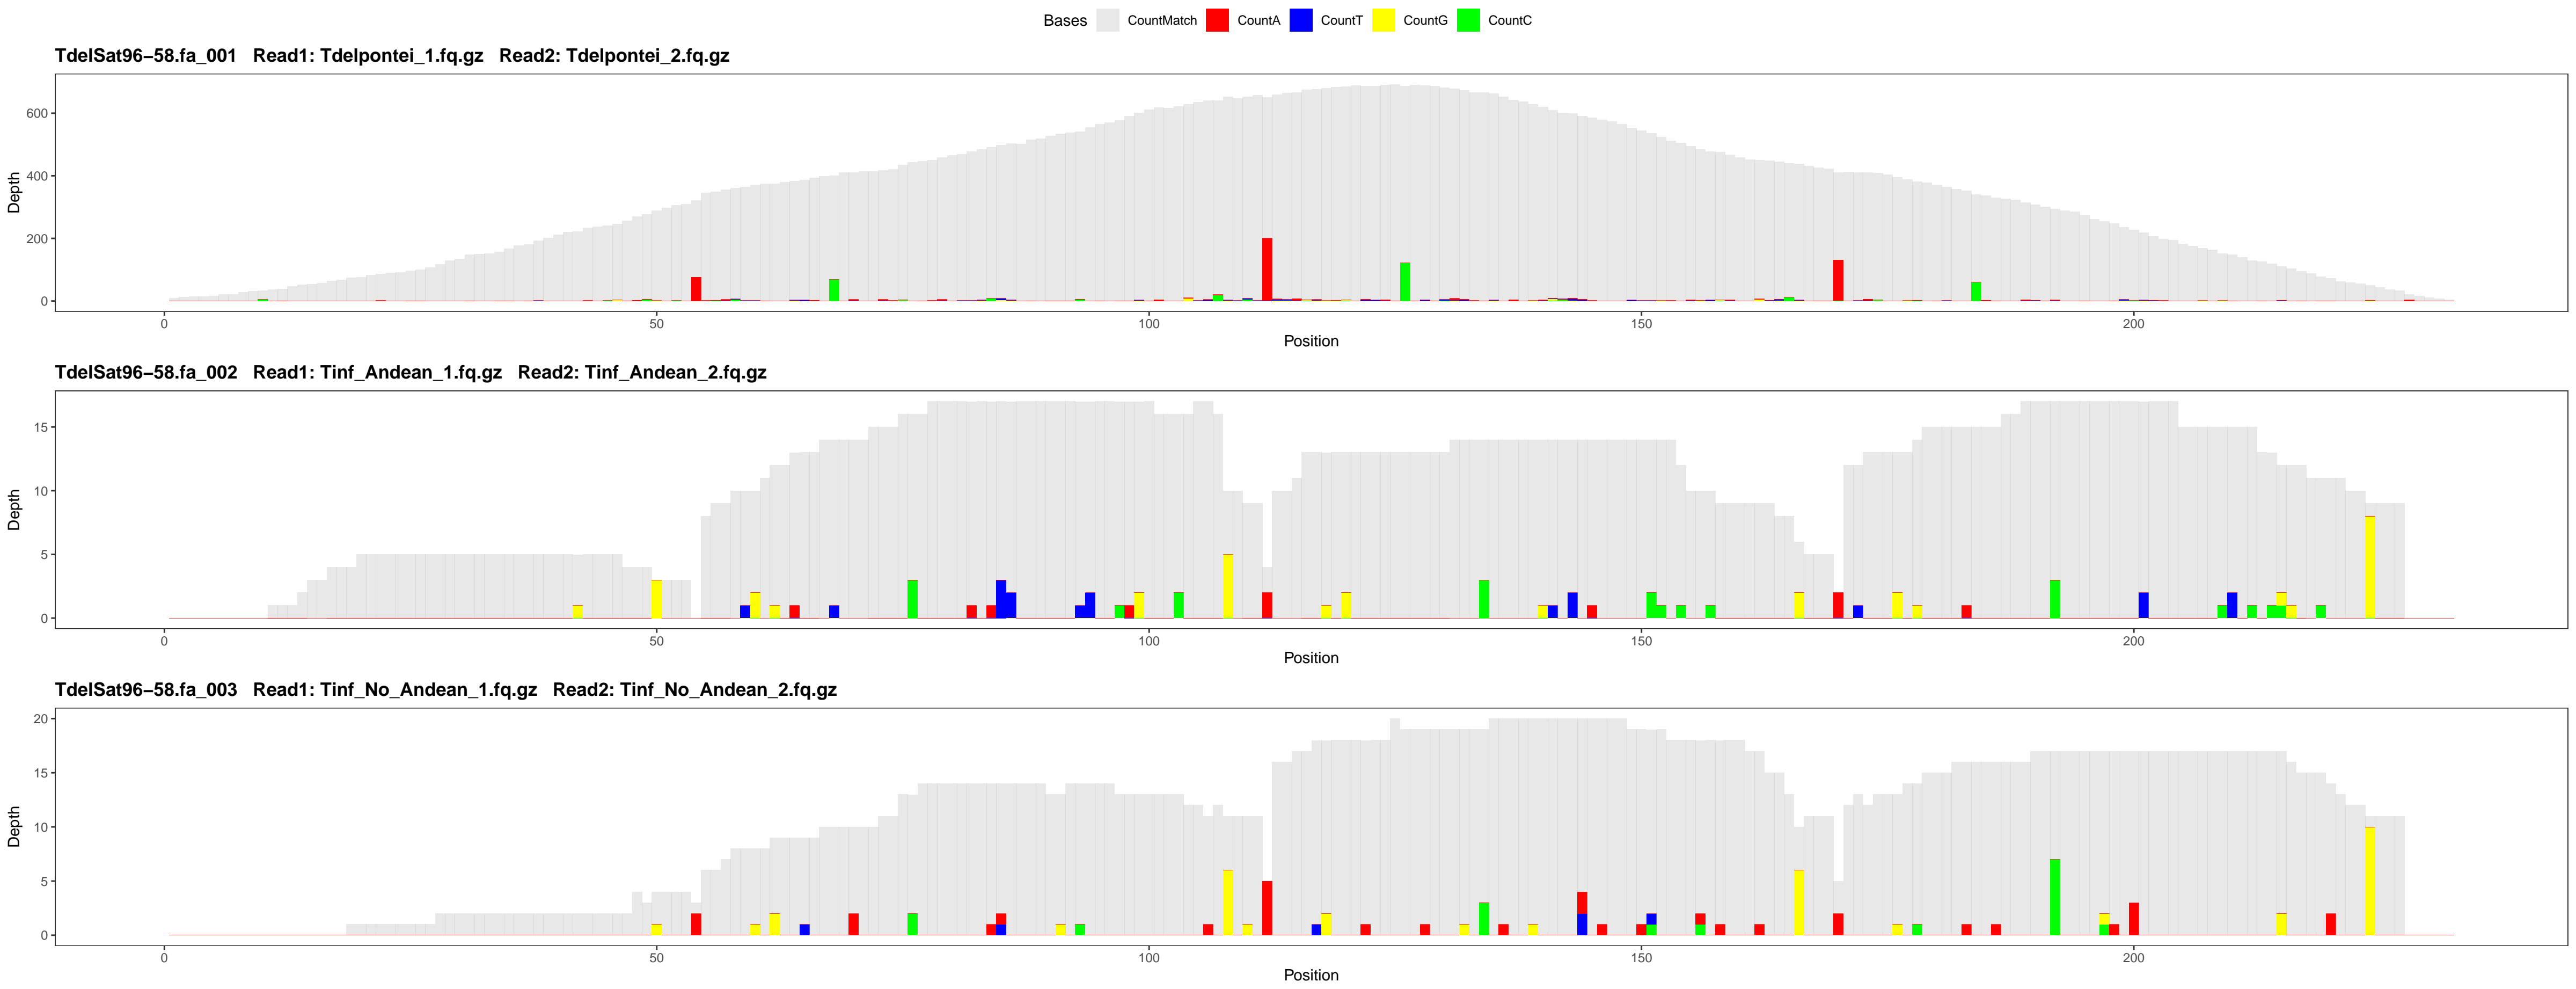

Bases CountMatch CountA CountT CountG CountC

TdelSat97-238.fa\_001 Read1: Tdelpontei\_1.fq.gz Read2: Tdelpontei\_2.fq.gz

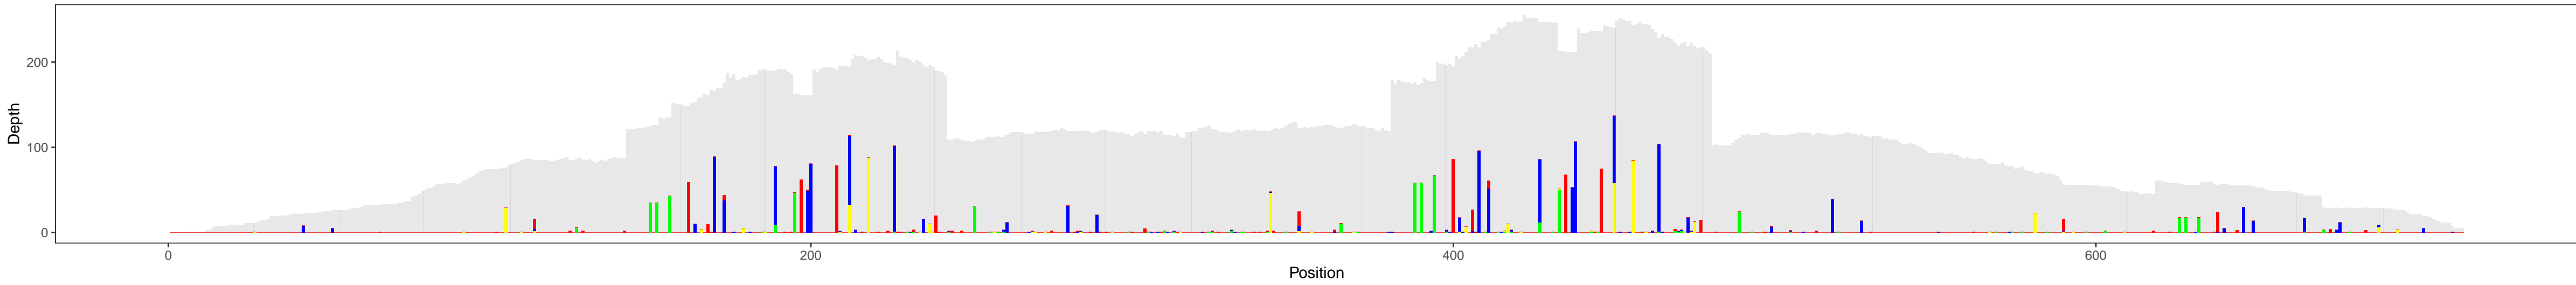

TdelSat97-238.fa\_002 Read1: Tinf\_Andean\_1.fq.gz Read2: Tinf\_Andean\_2.fq.gz

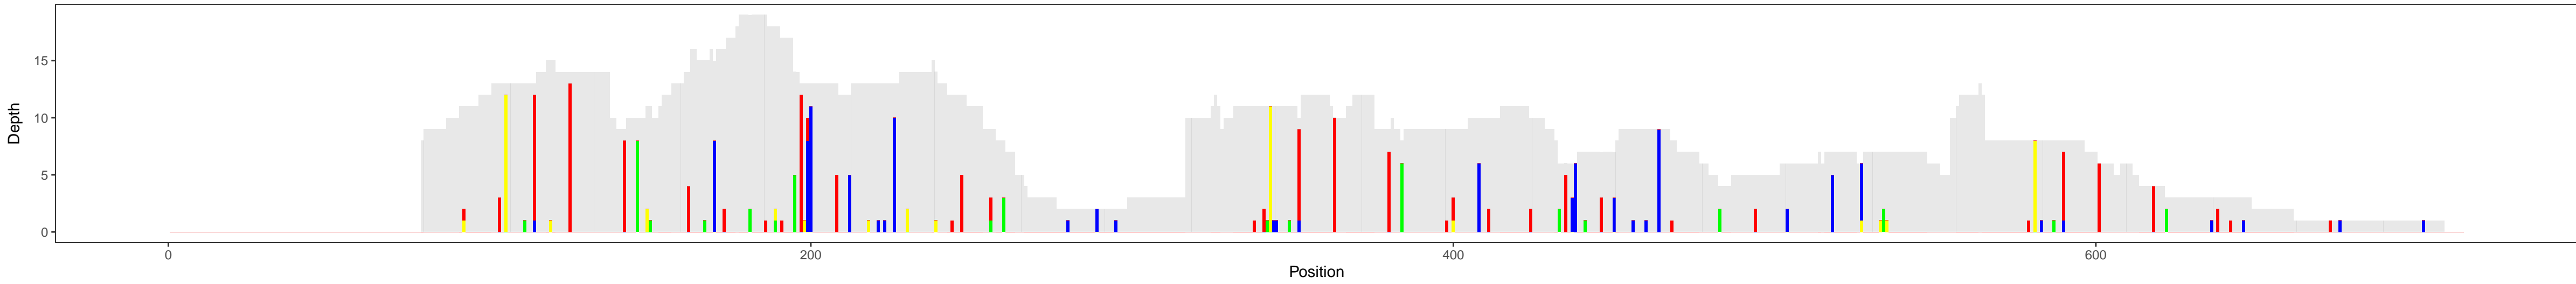

TdelSat97-238.fa\_003 Read1: Tinf\_No\_Andean\_1.fq.gz Read2: Tinf\_No\_Andean\_2.fq.gz

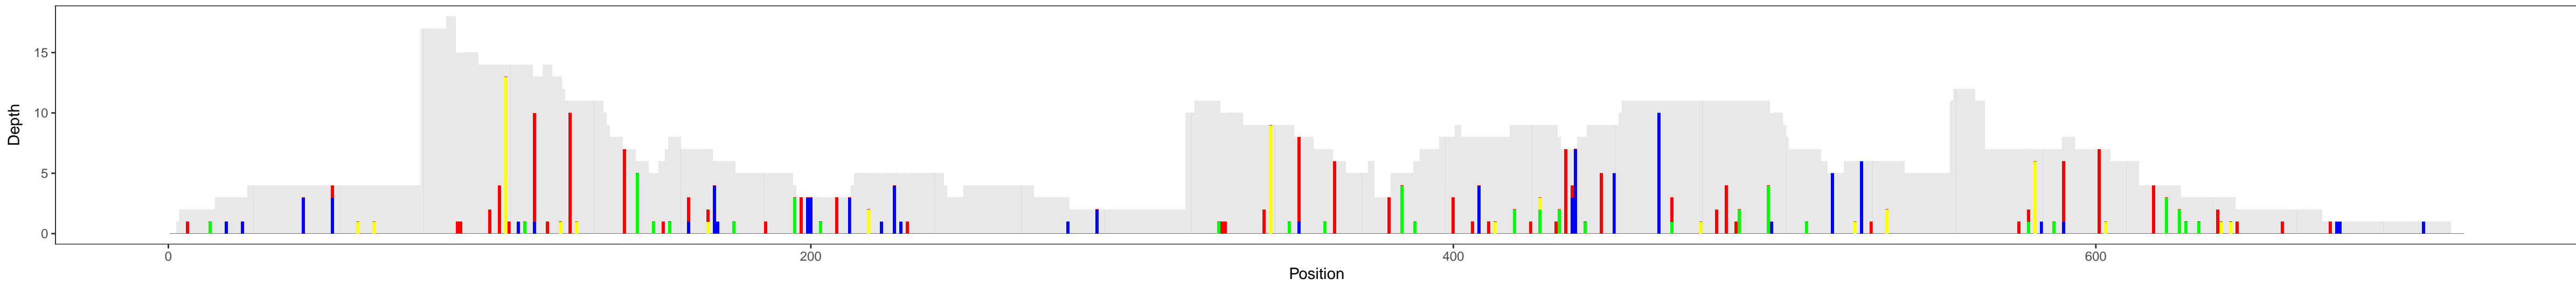

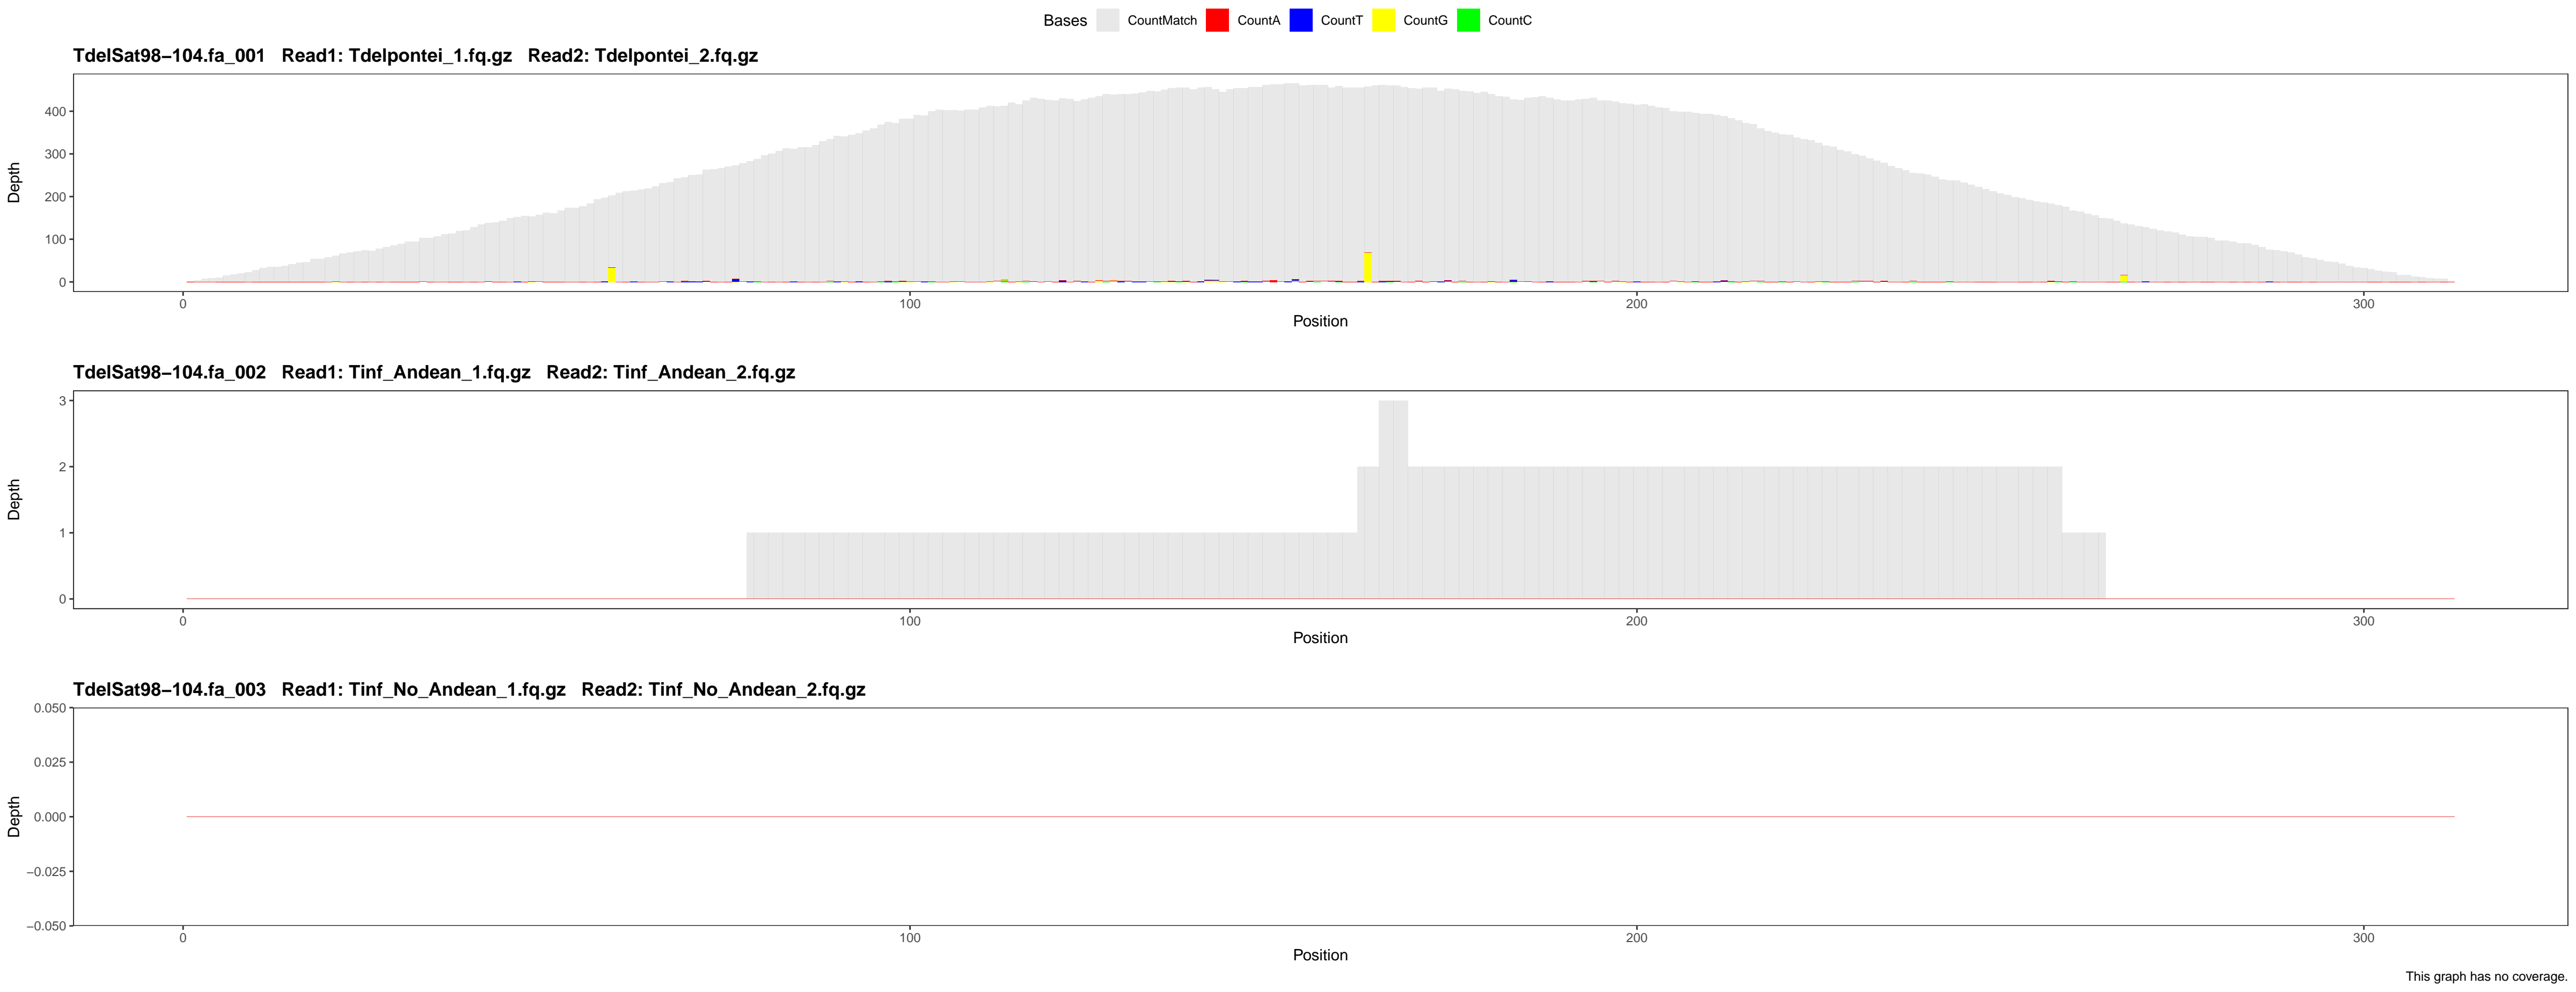

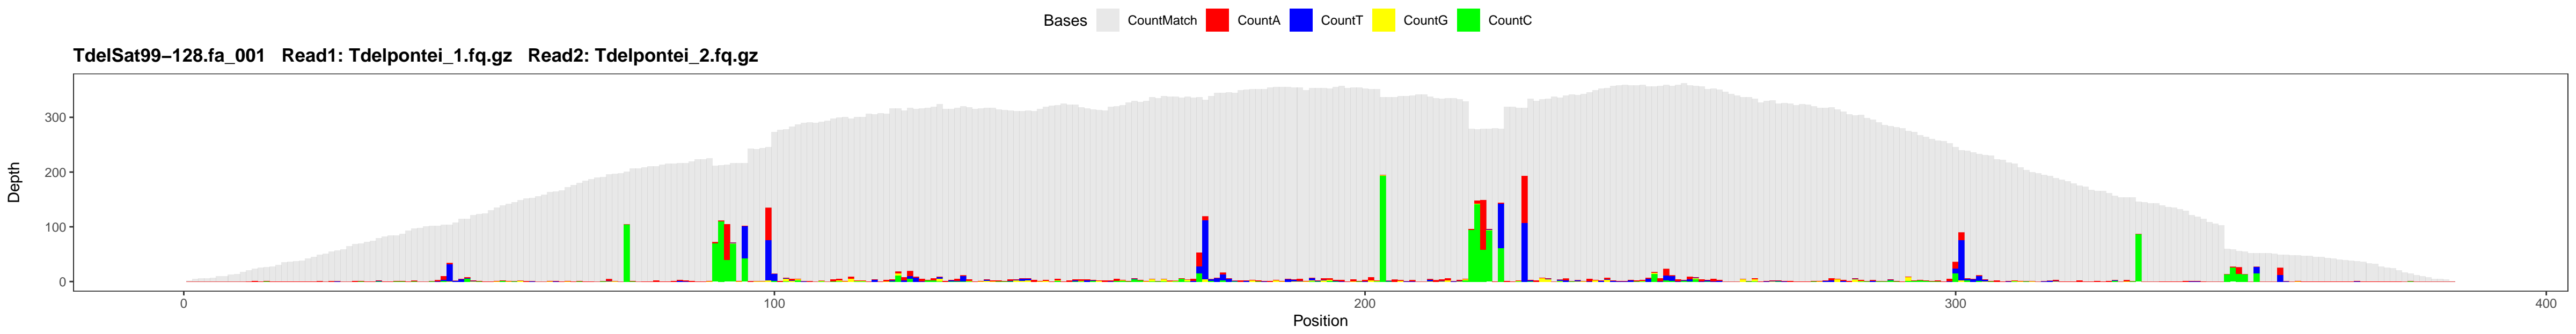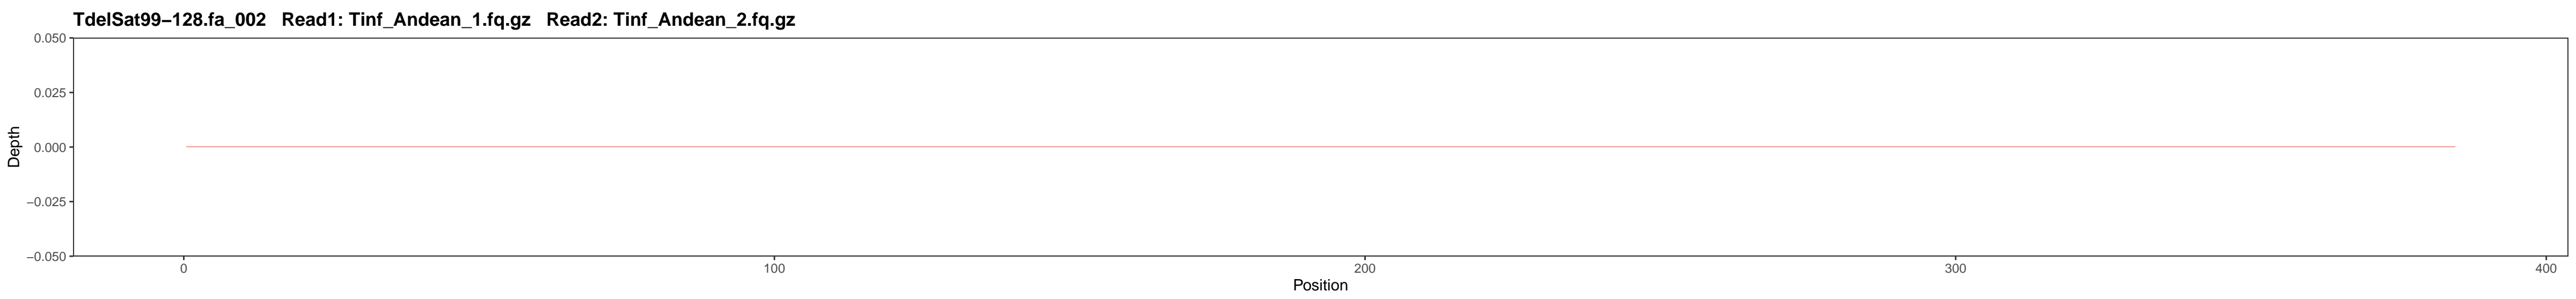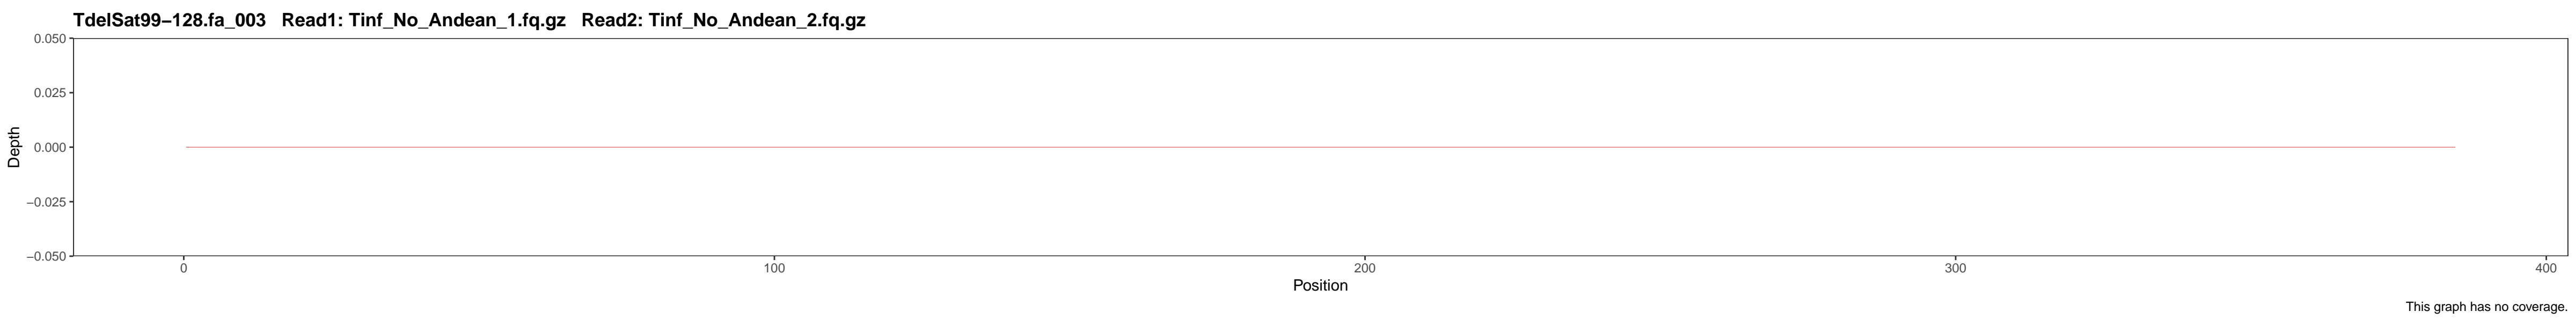

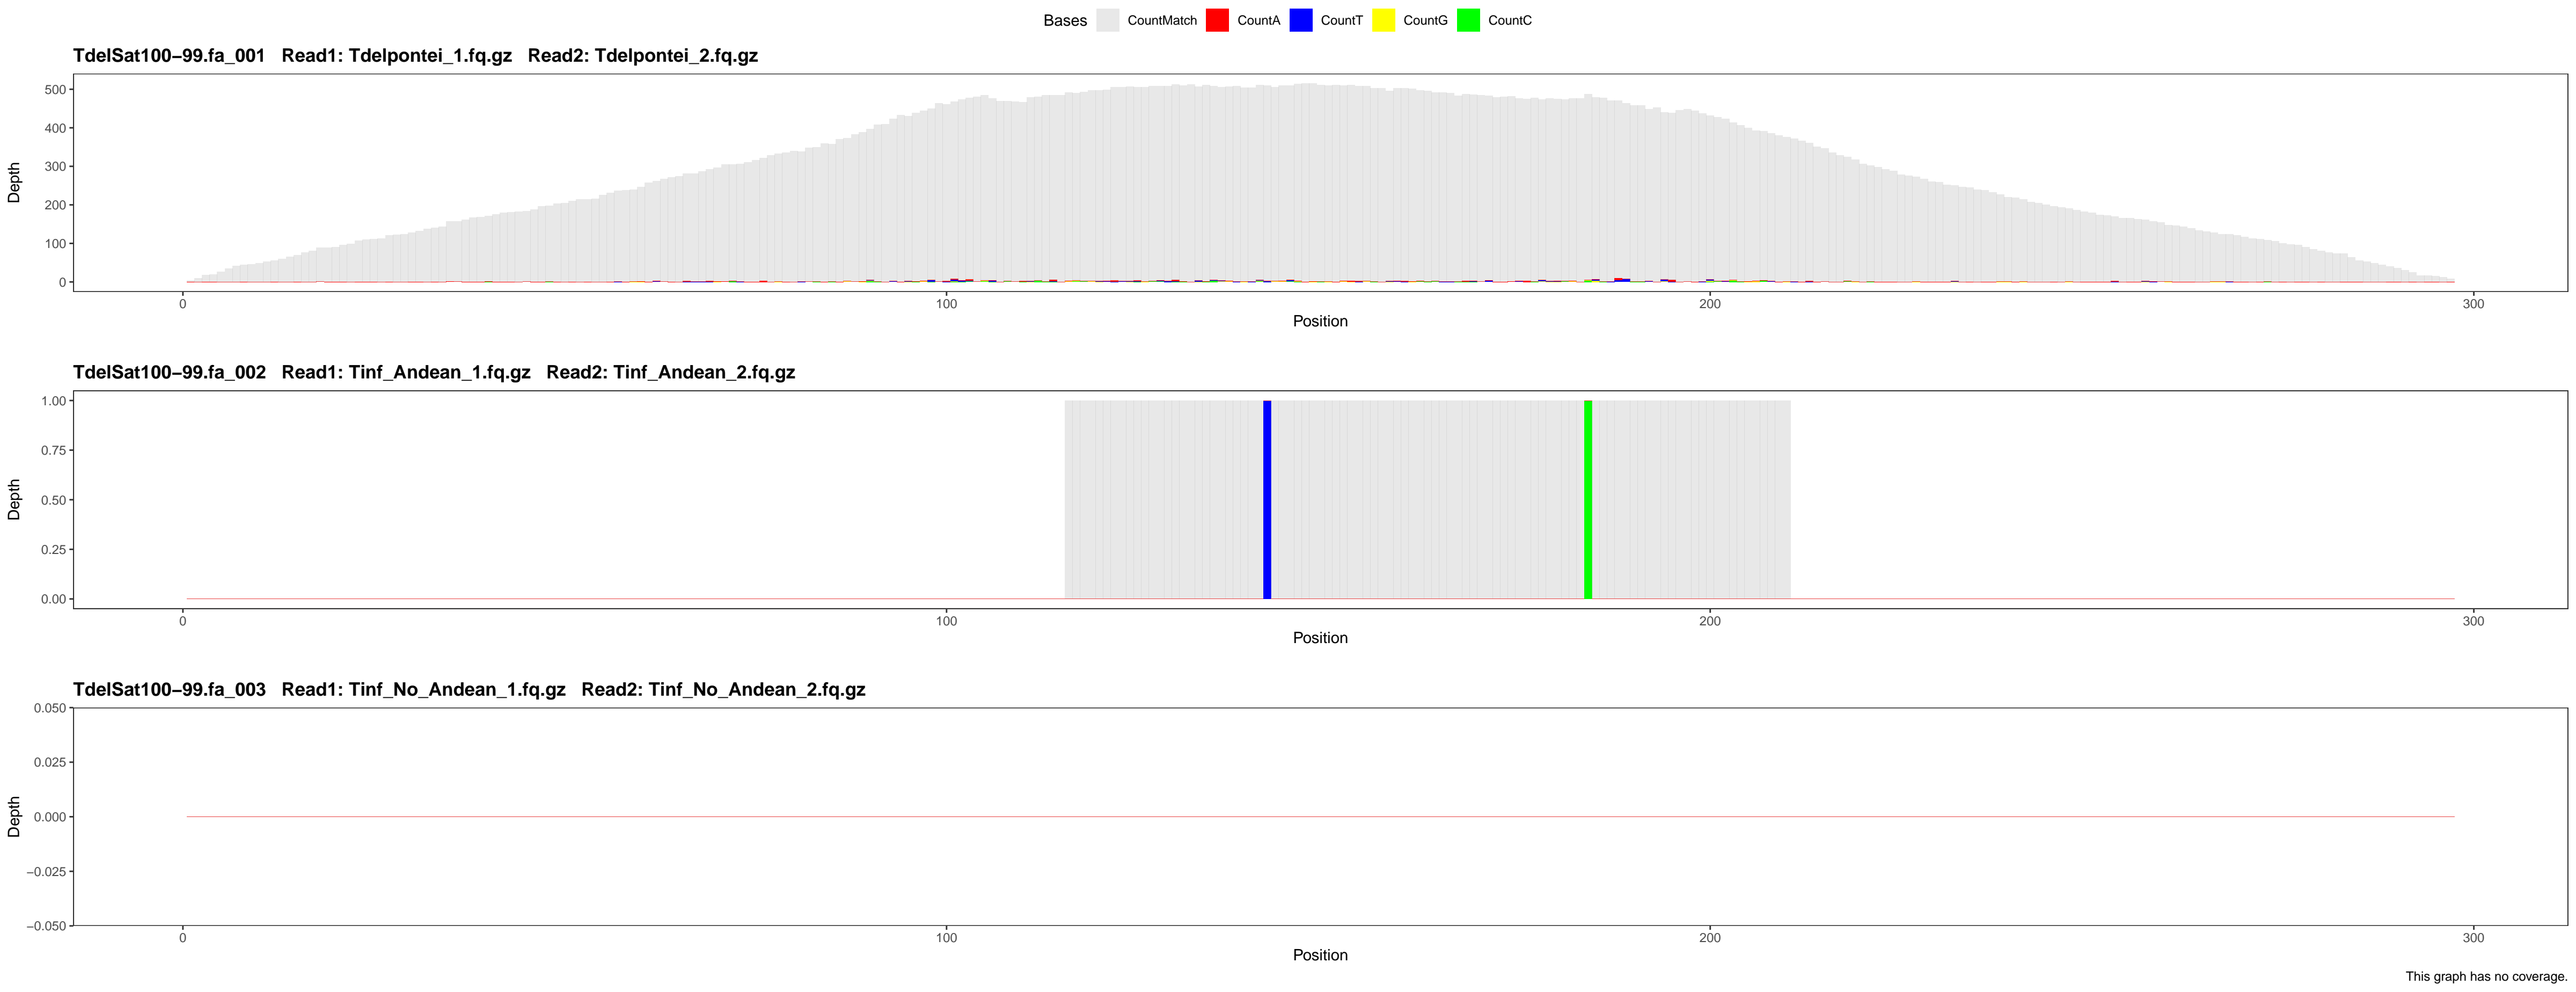

This graph has no coverage.

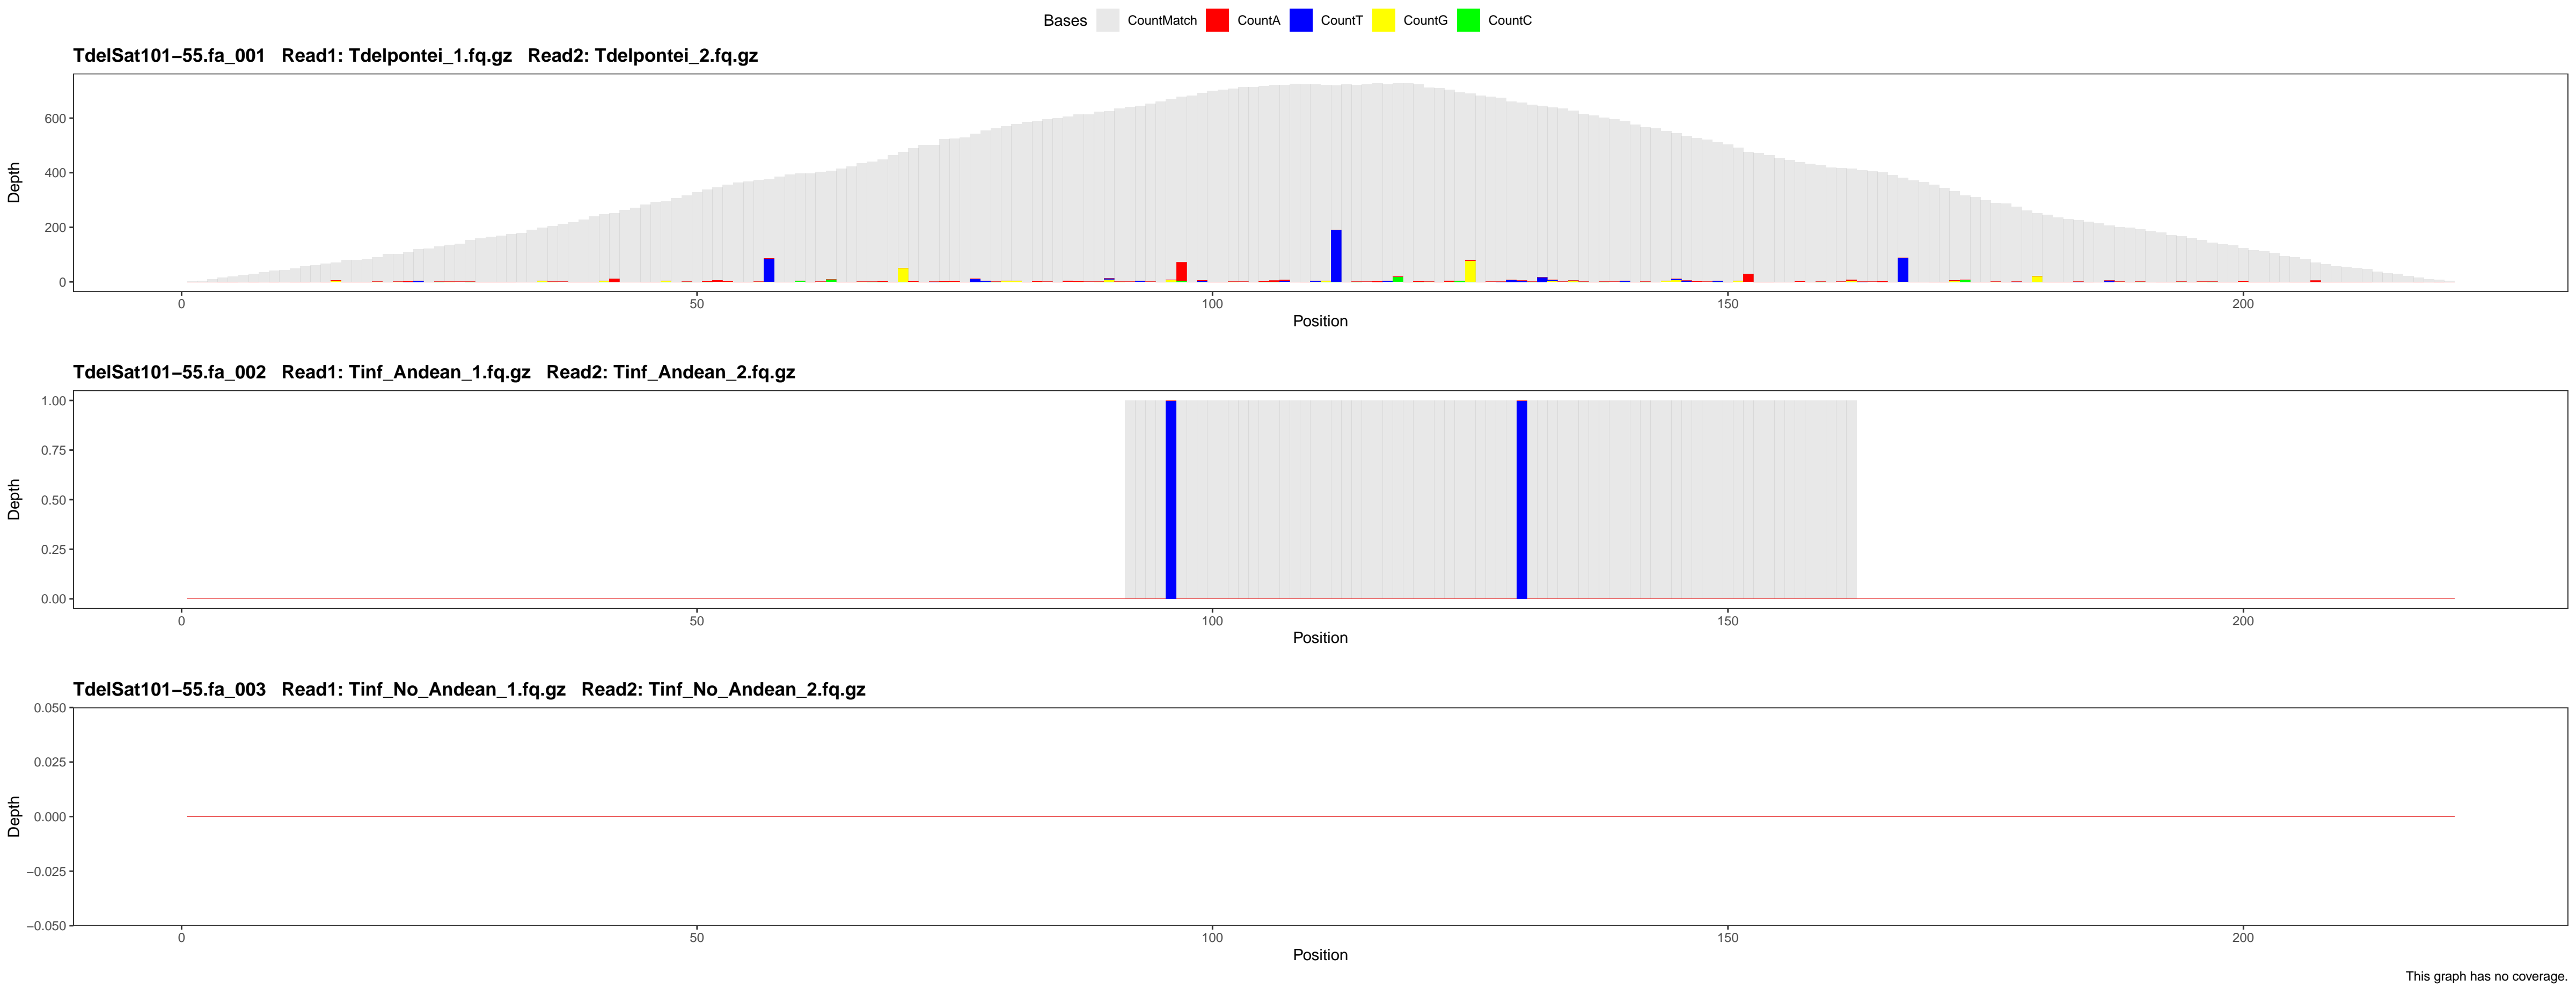

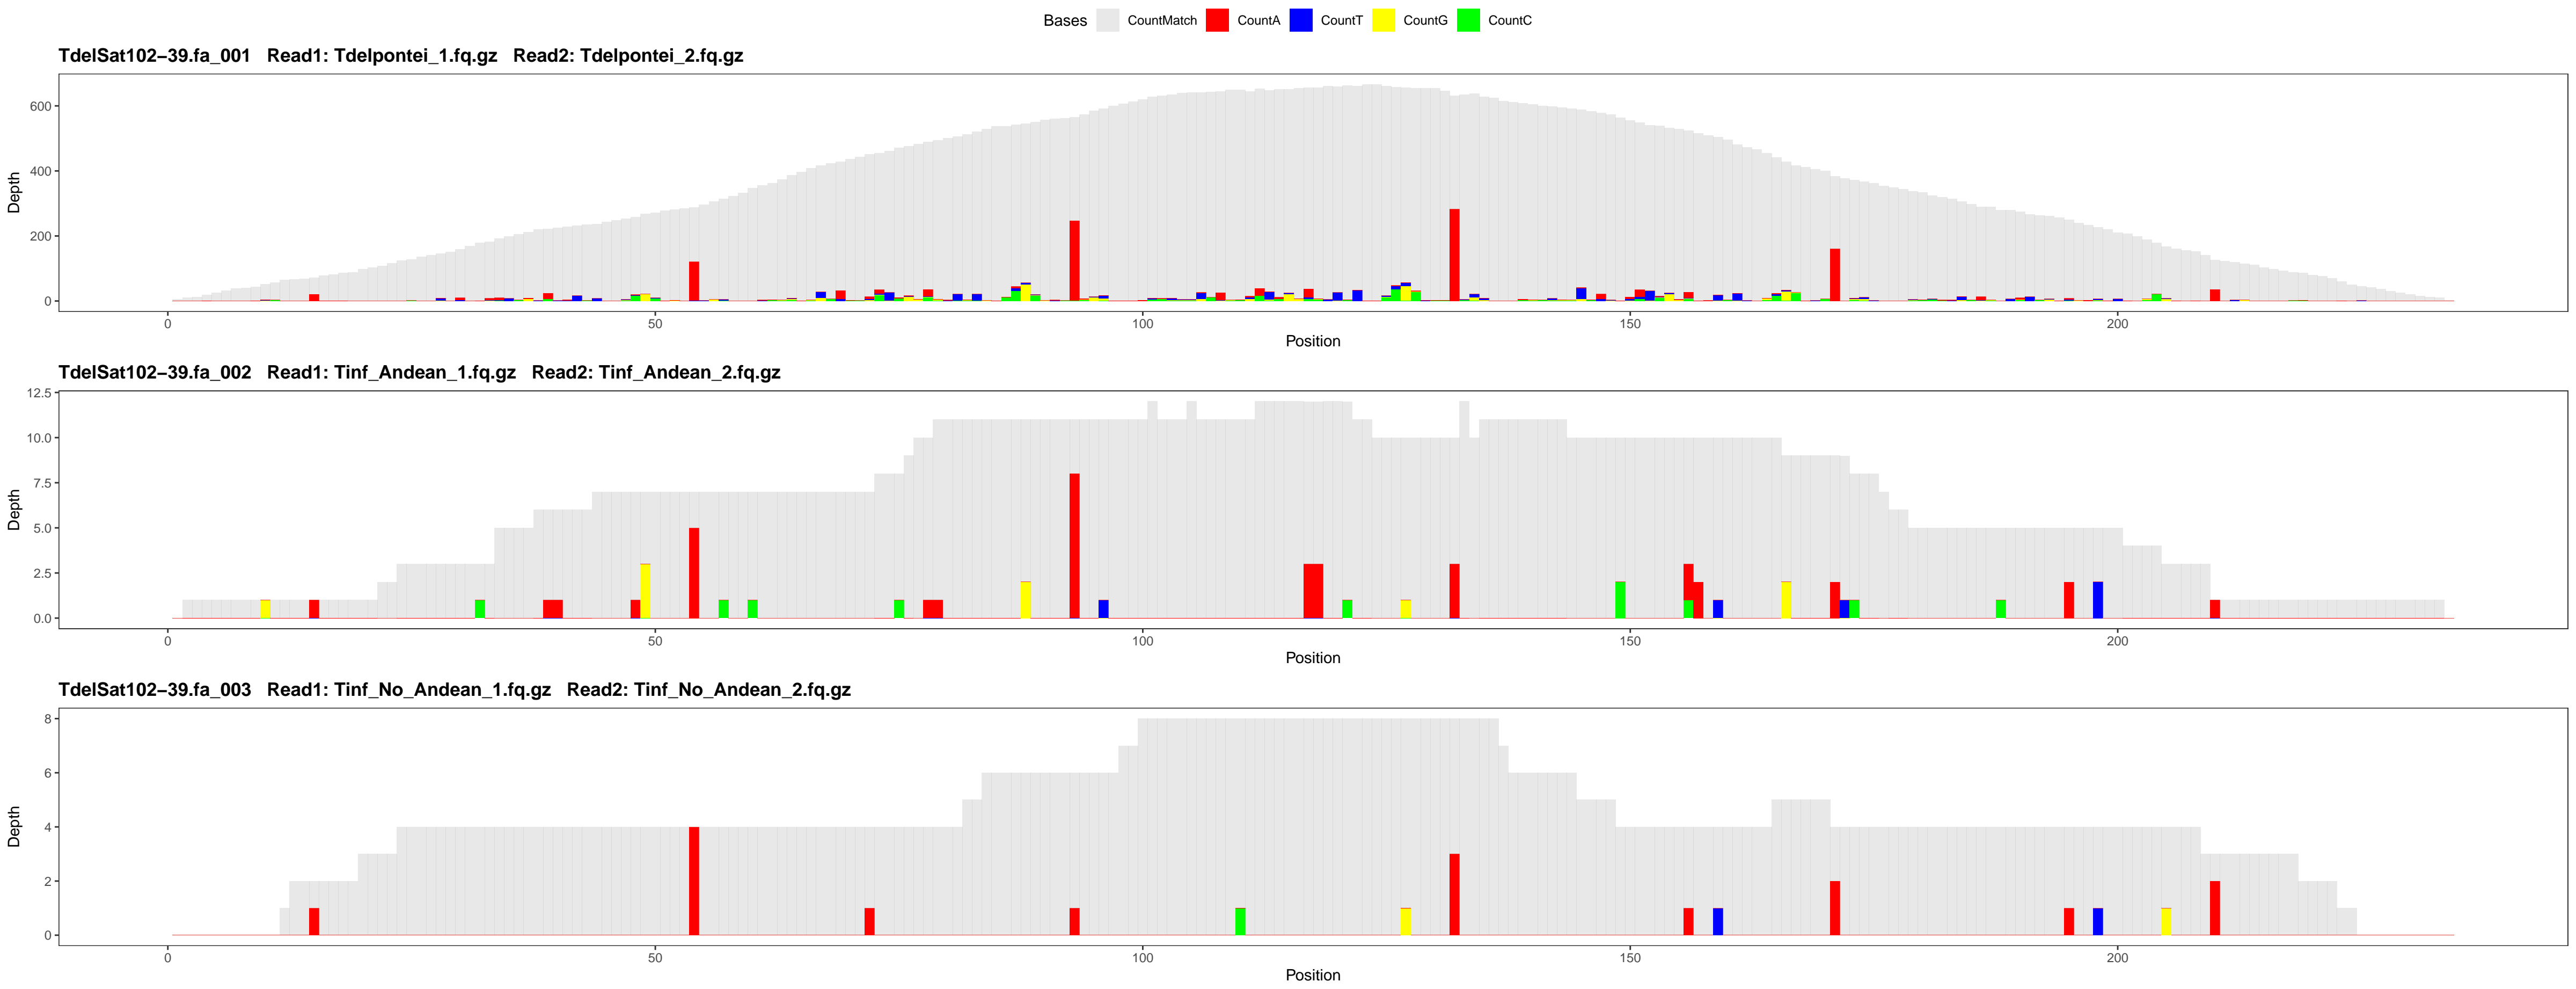



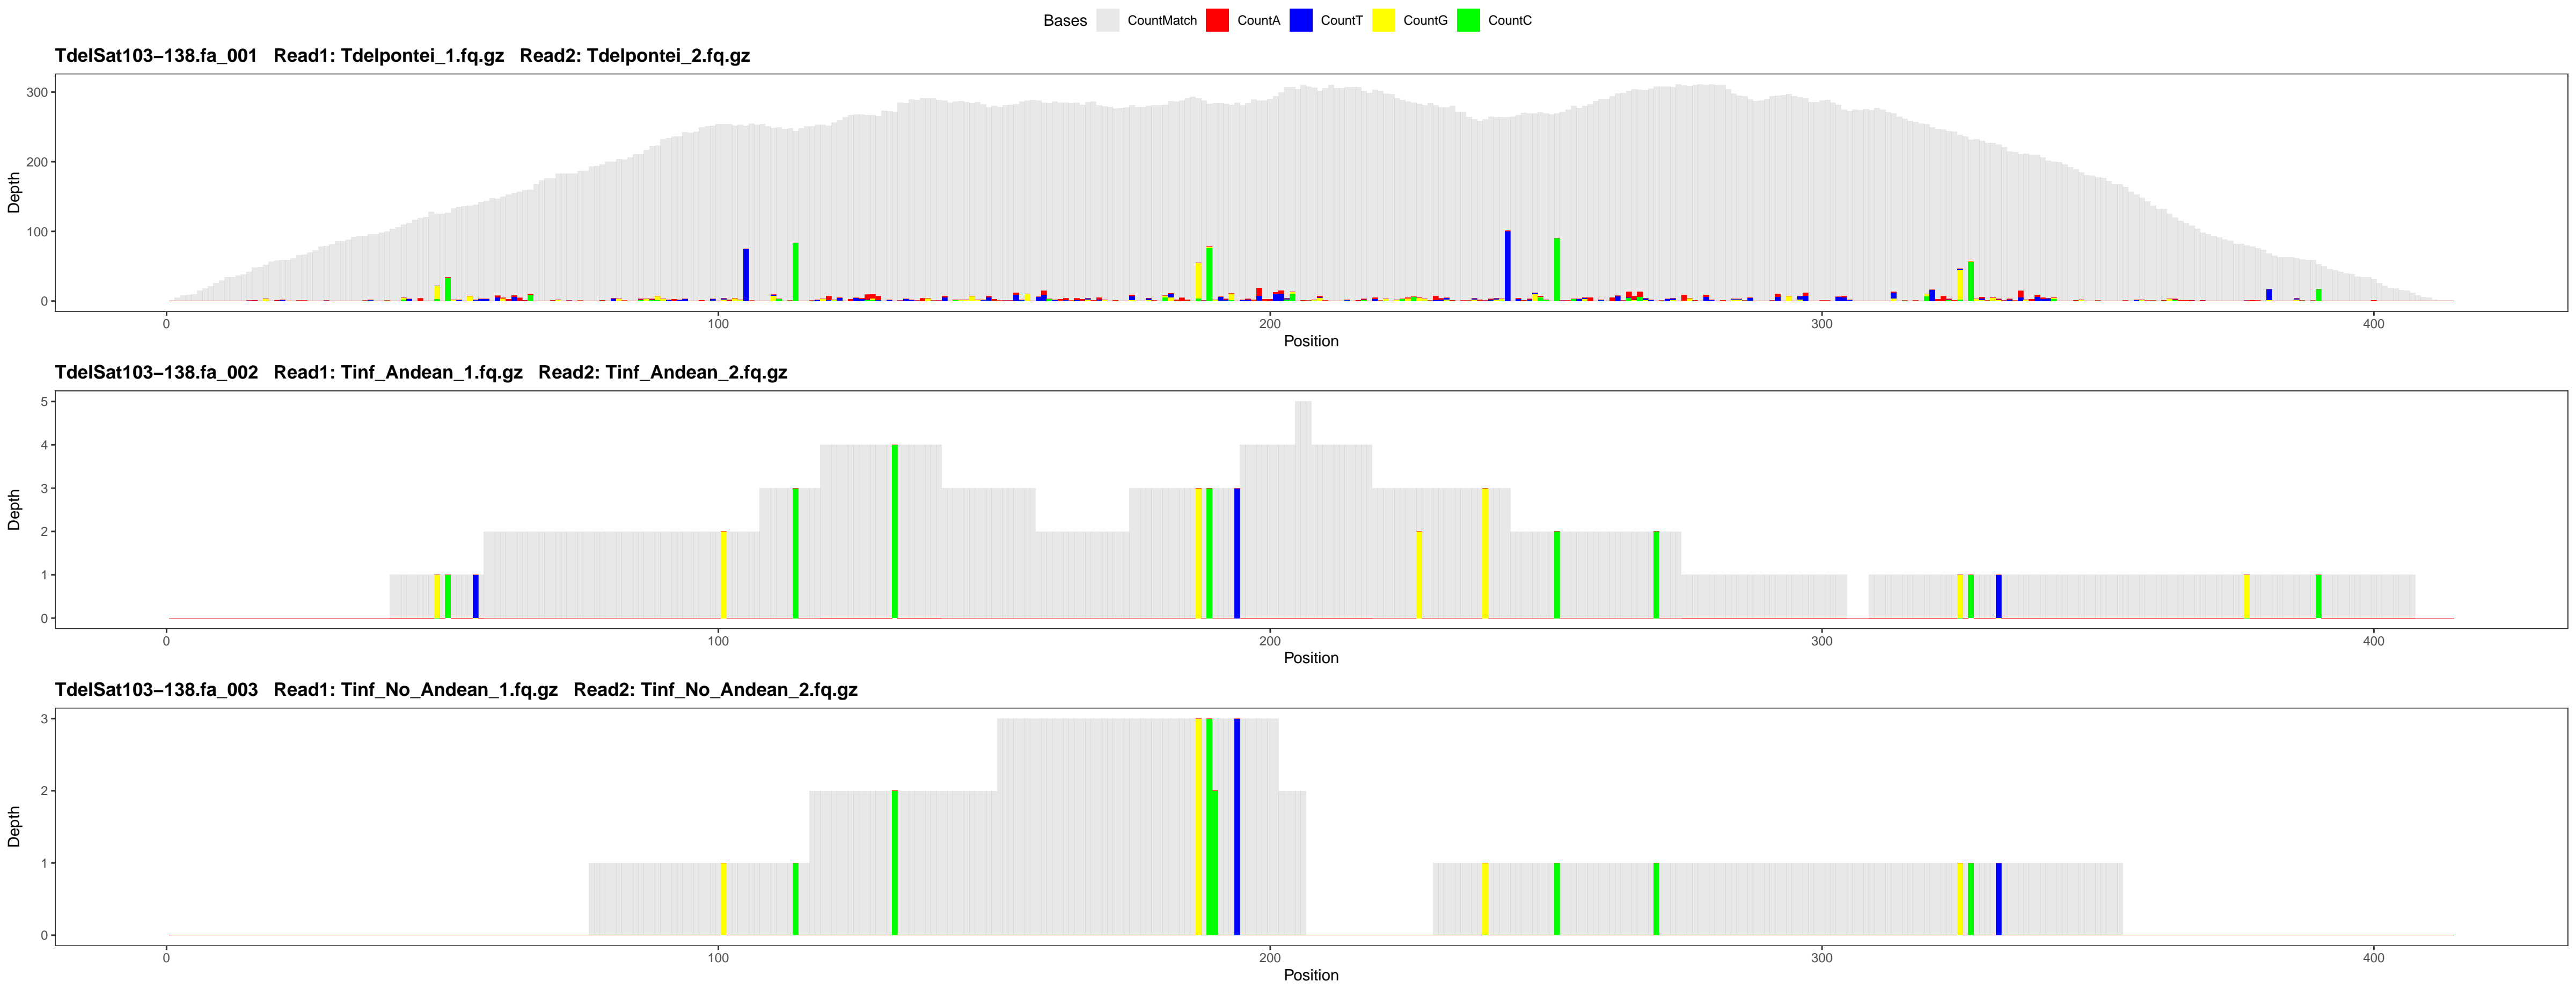

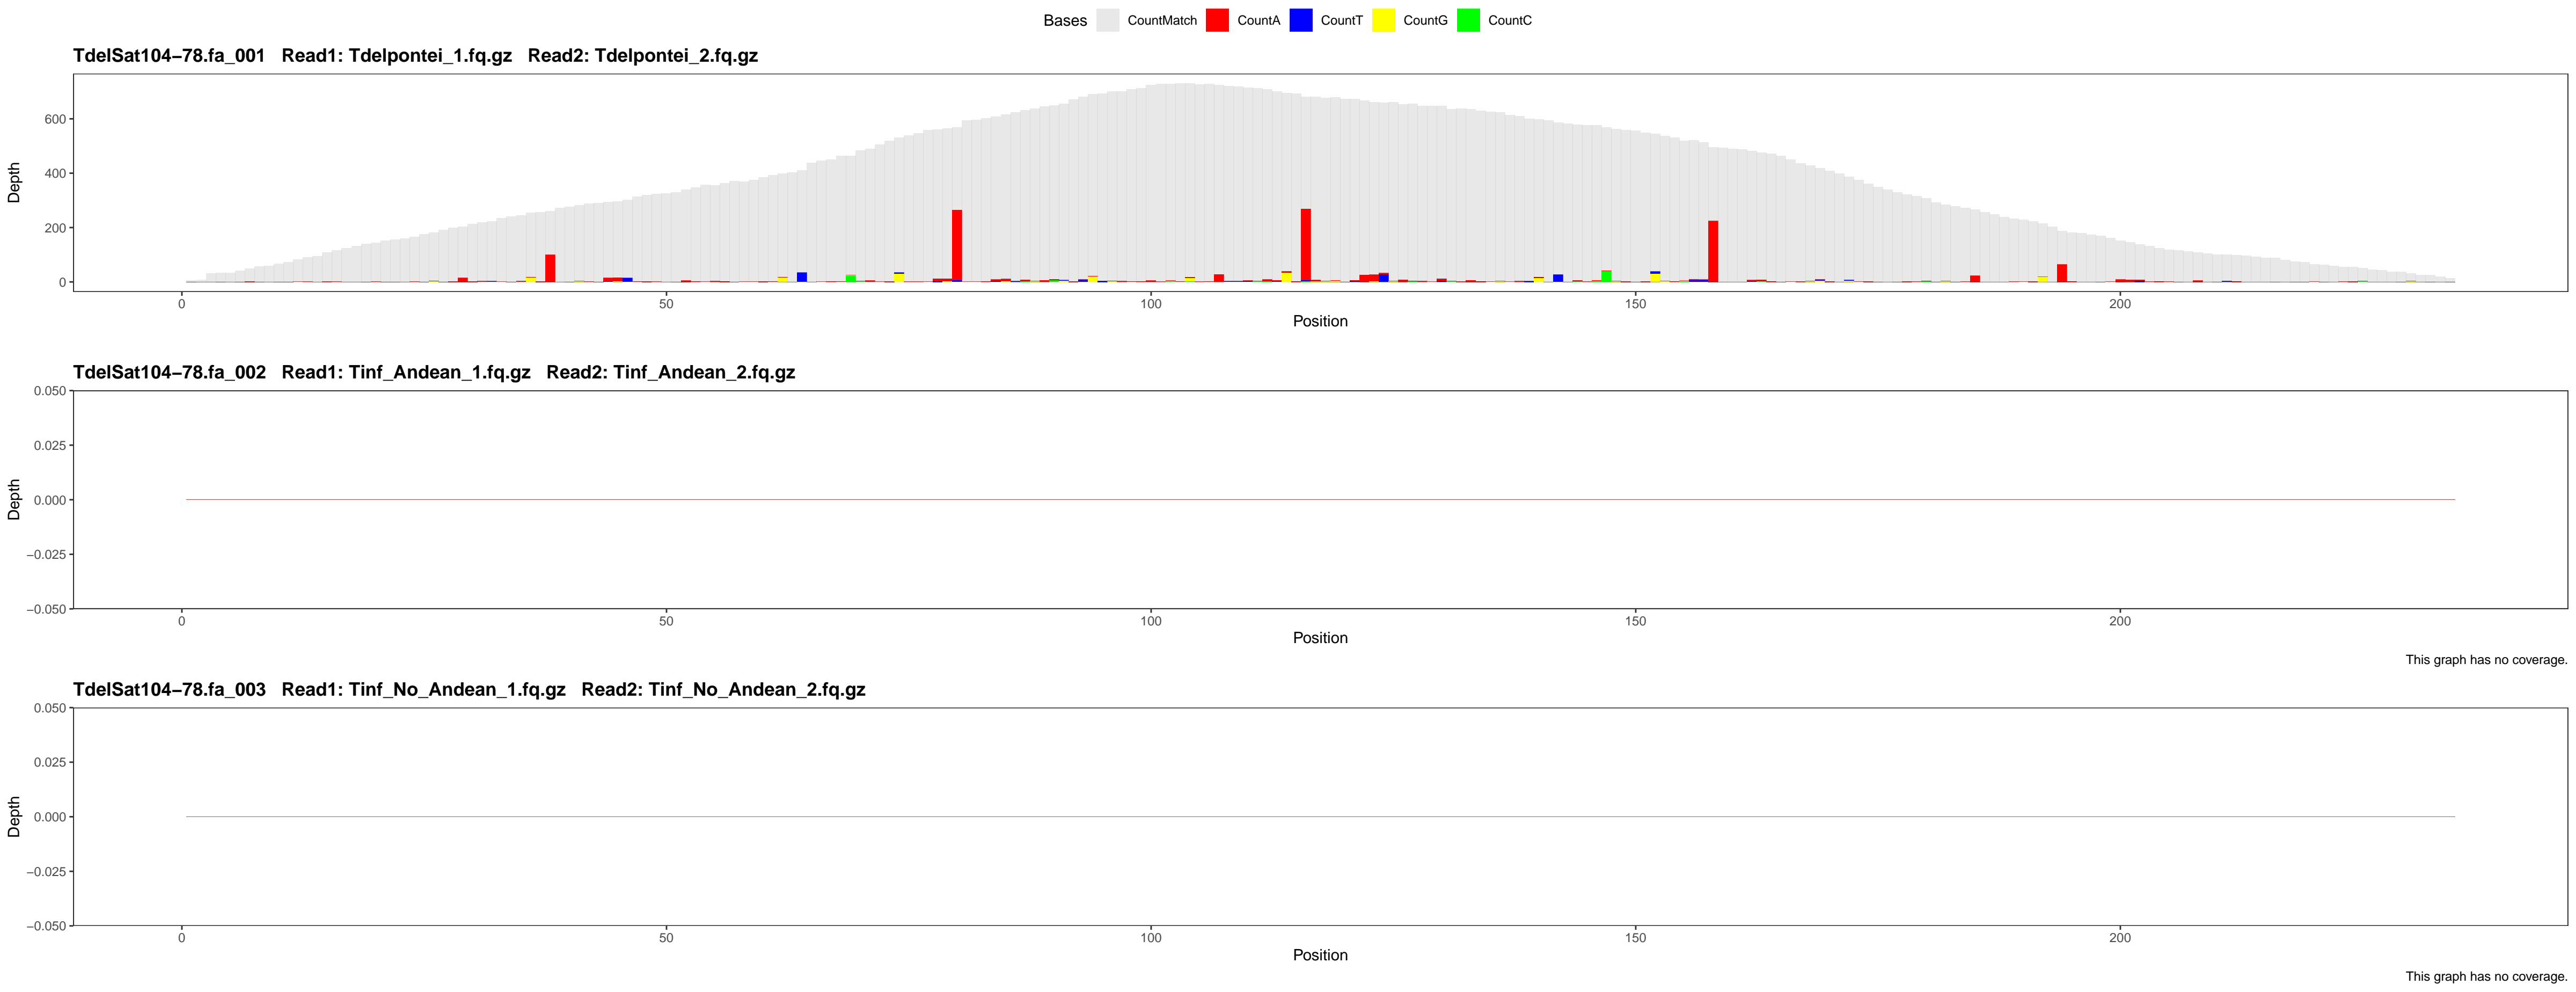

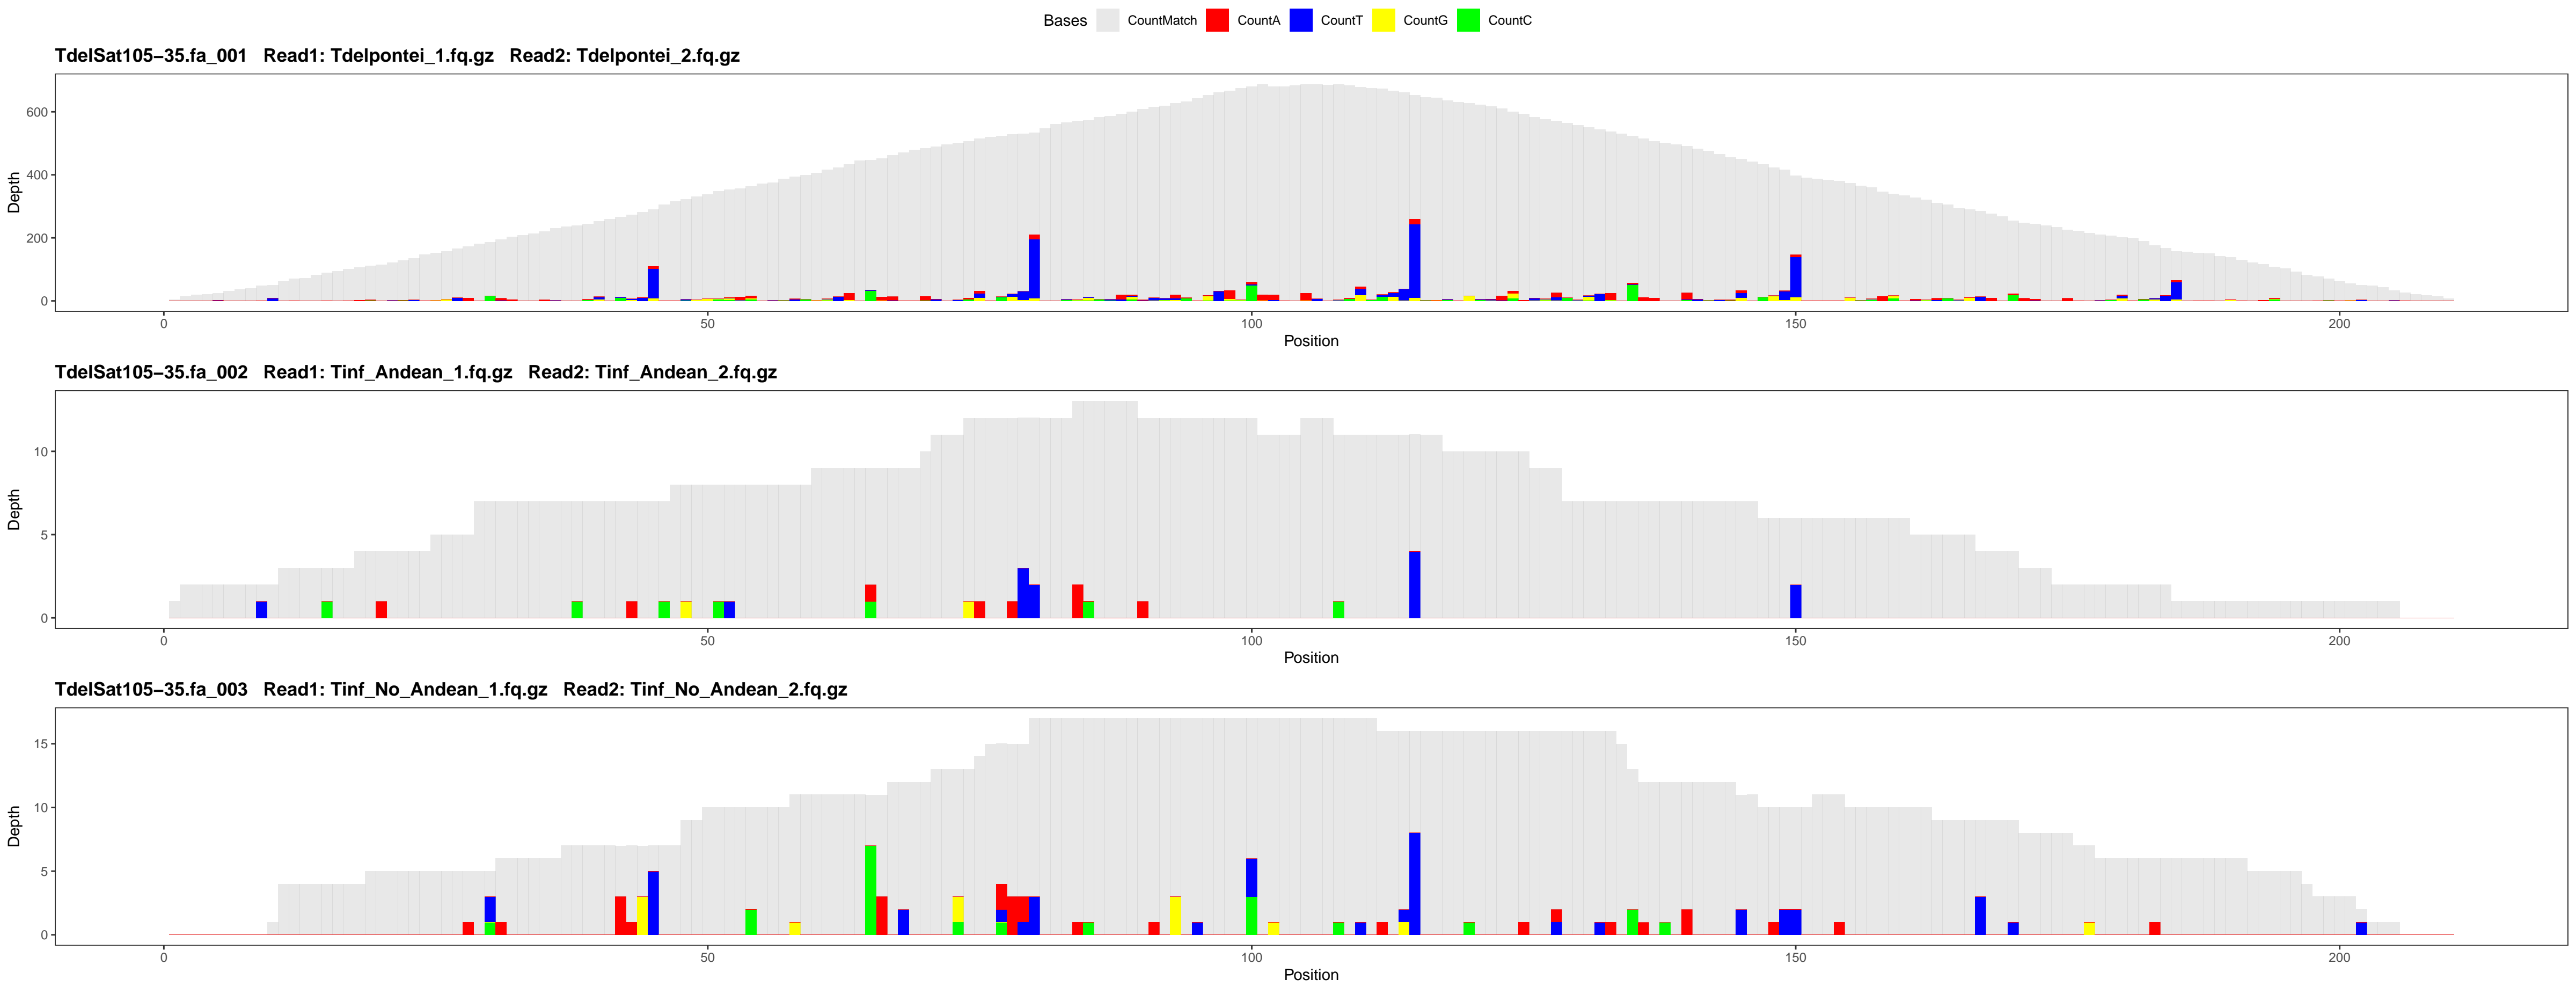

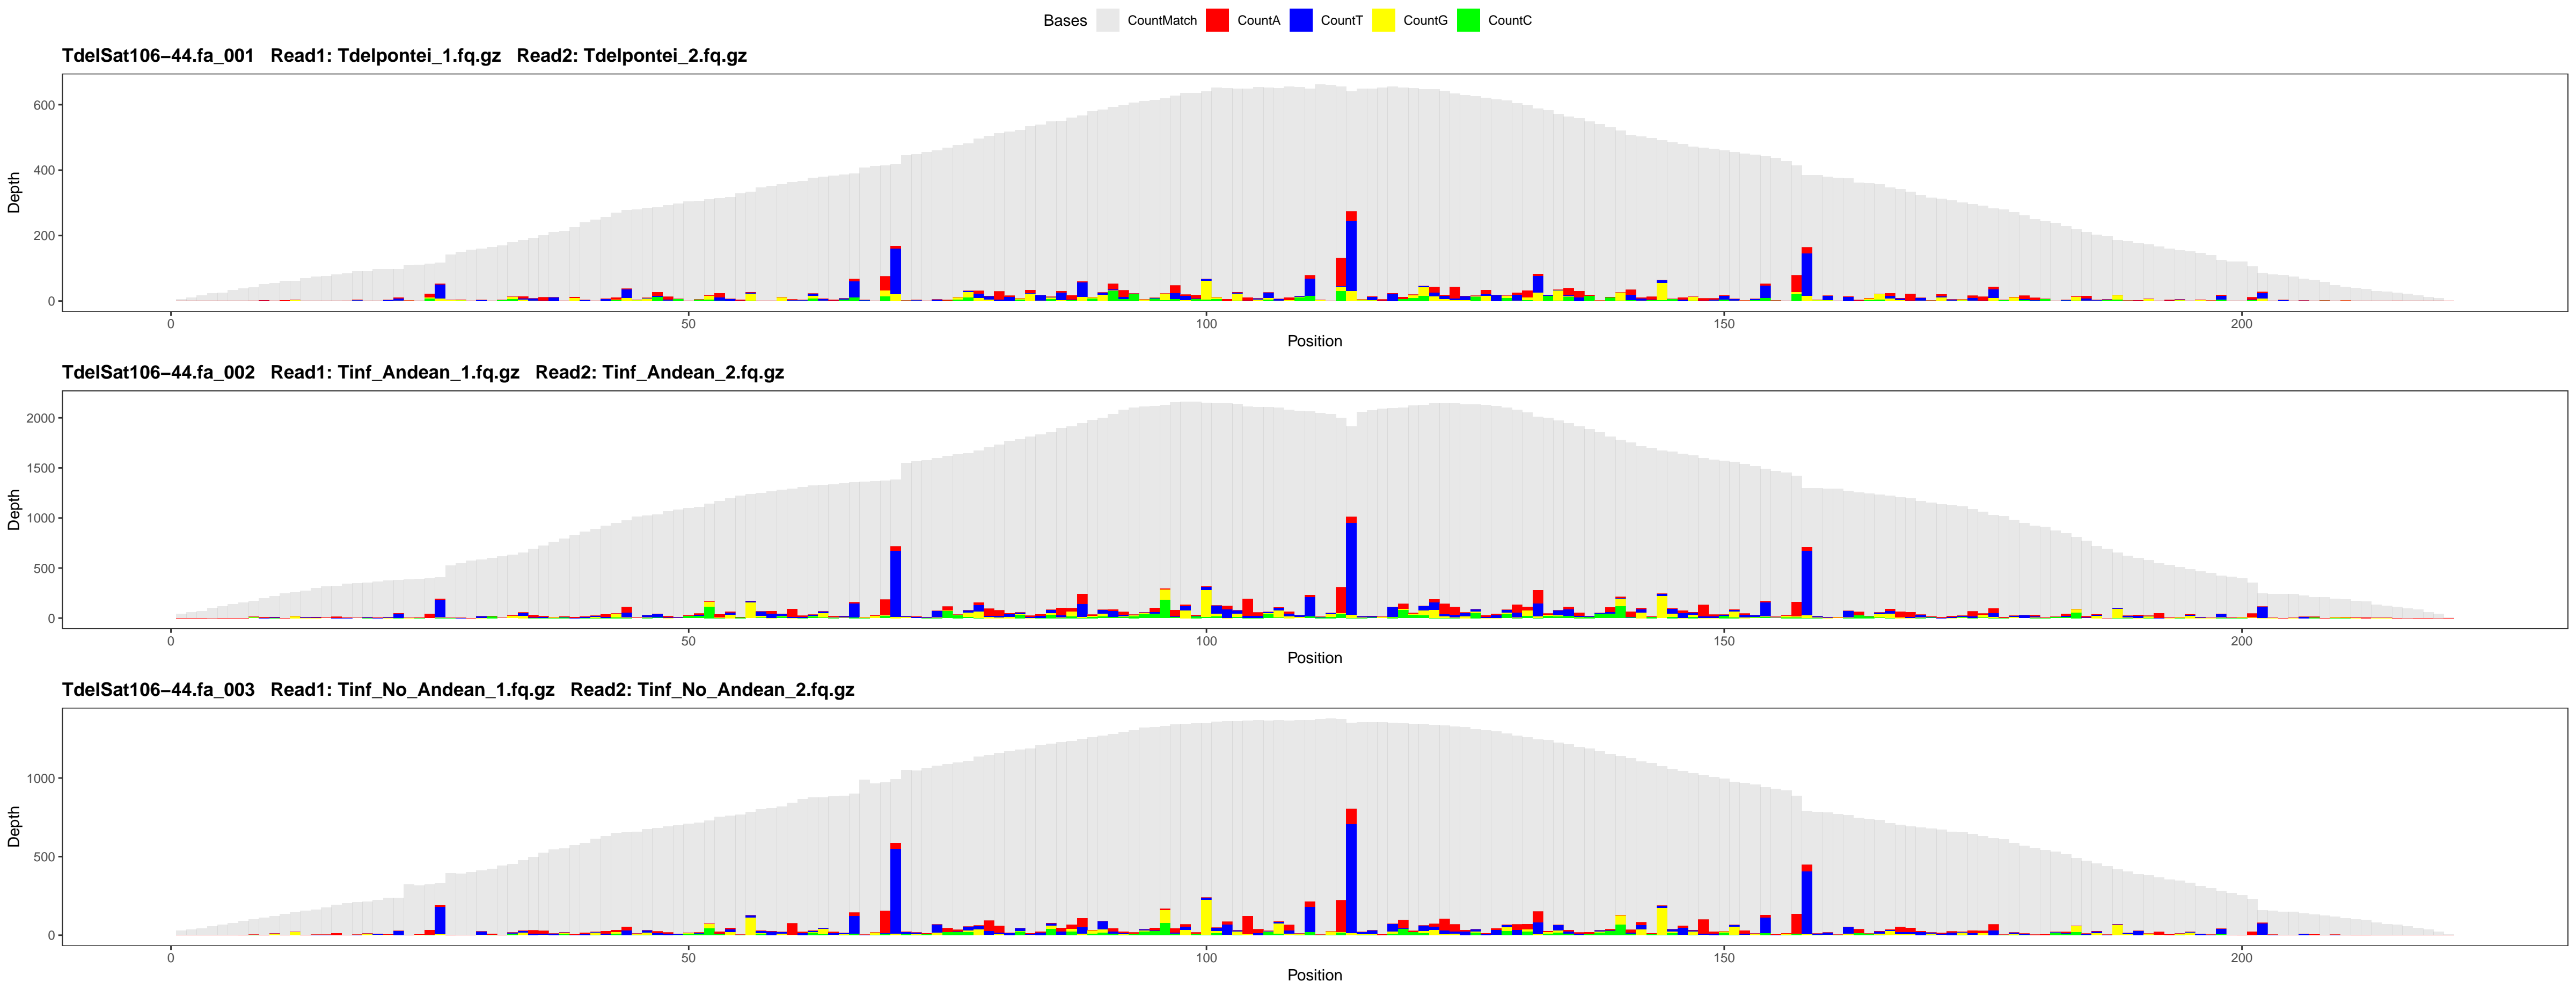

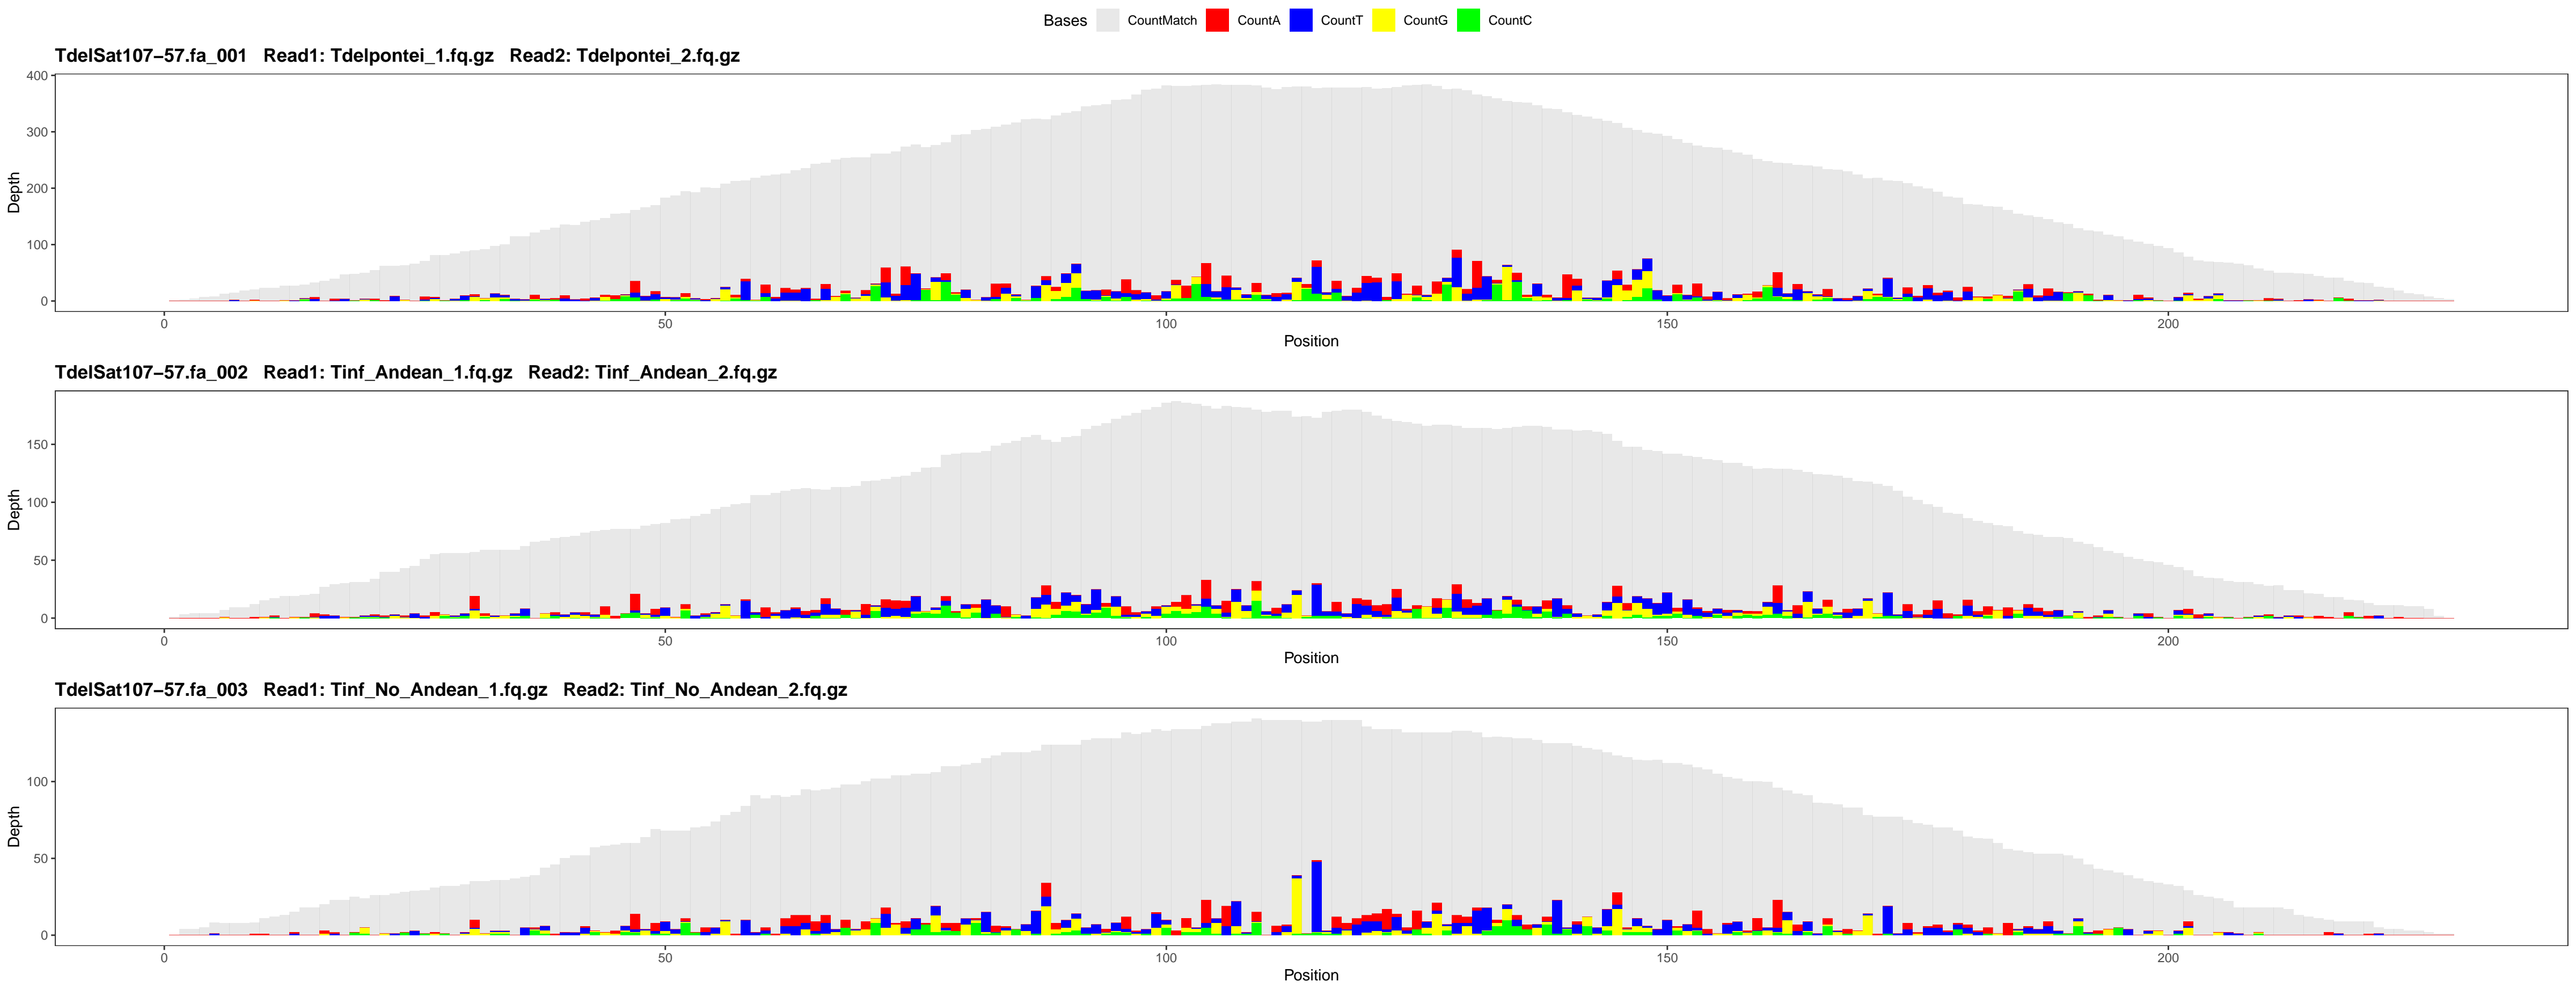

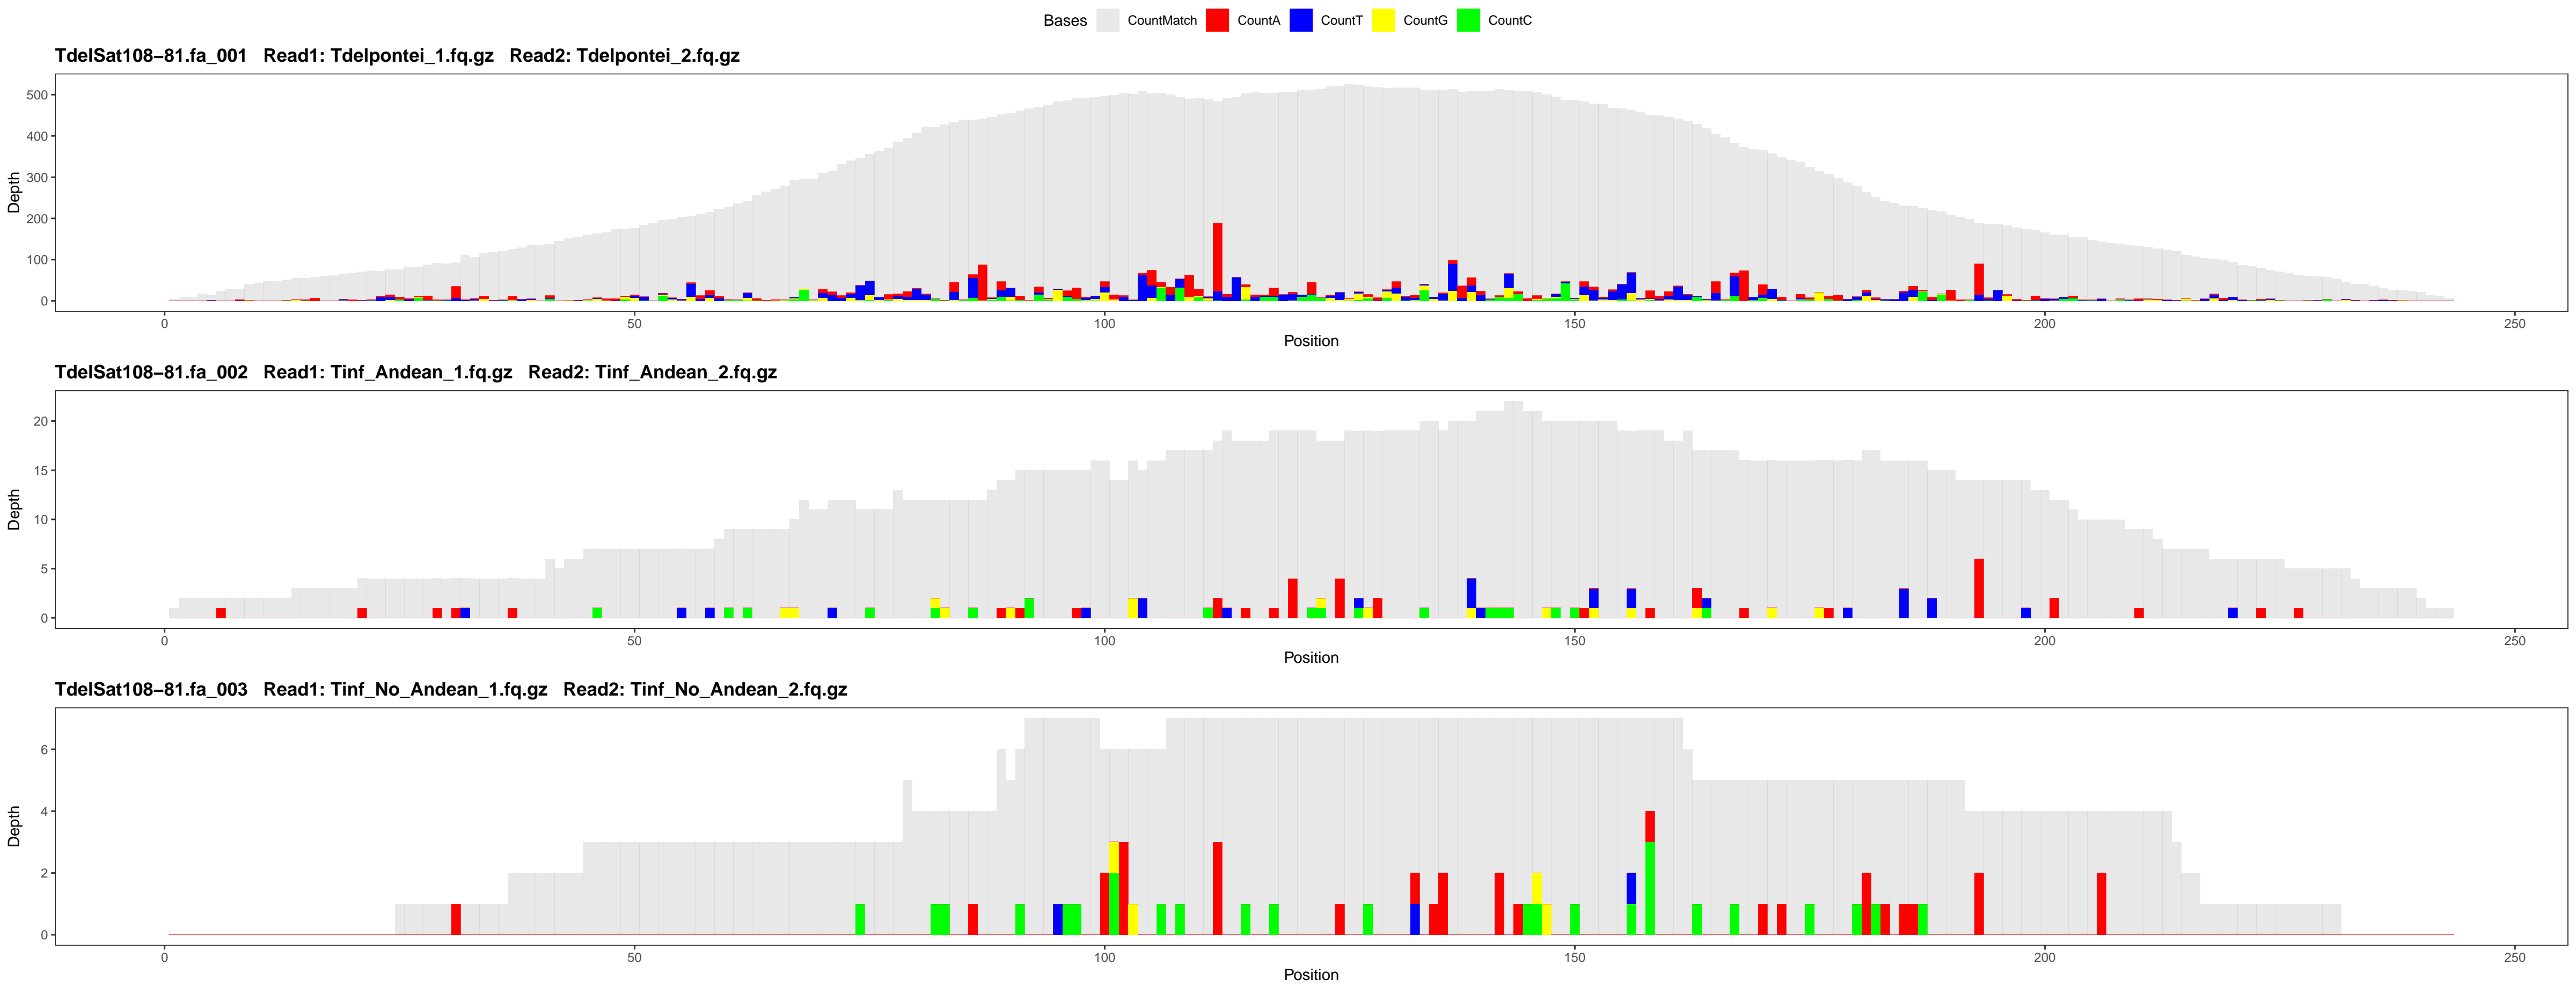

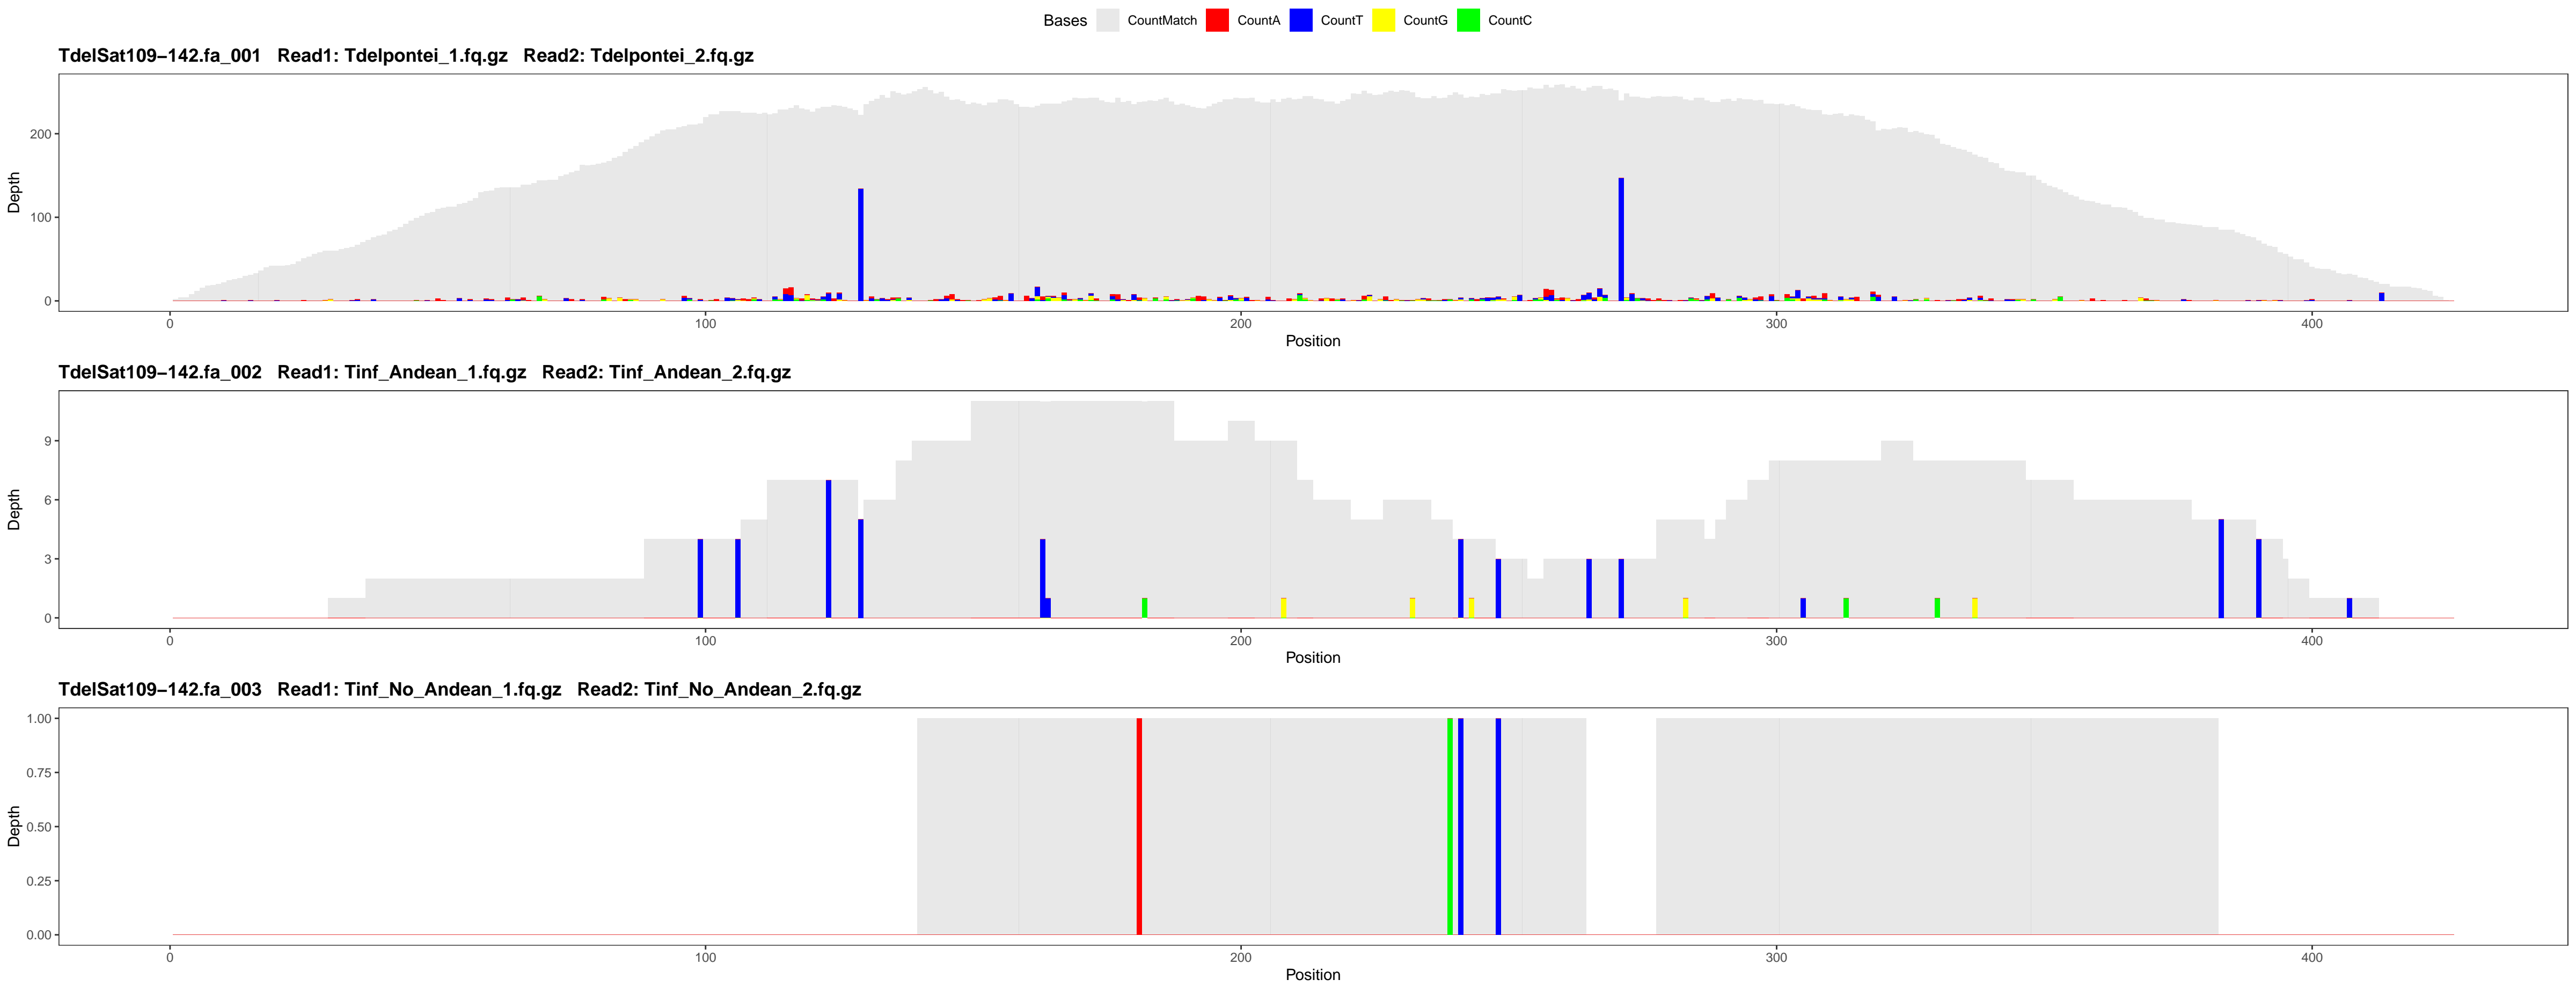

Bases CountMatch CountA CountT CountG CountC

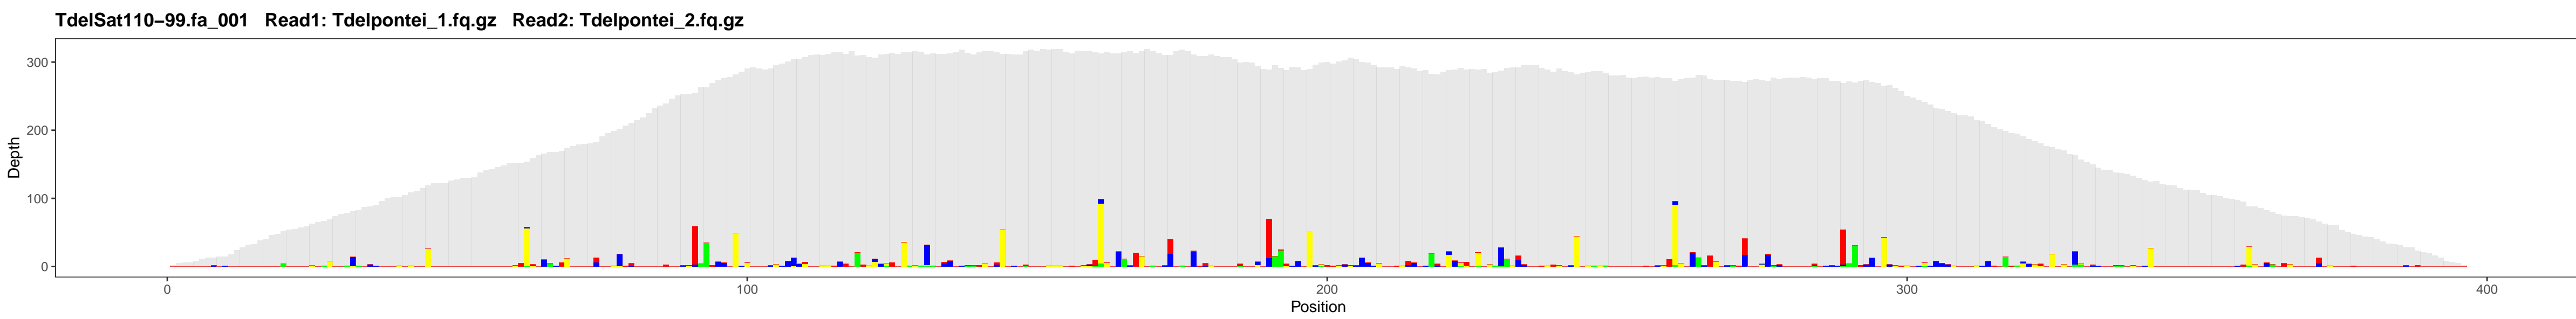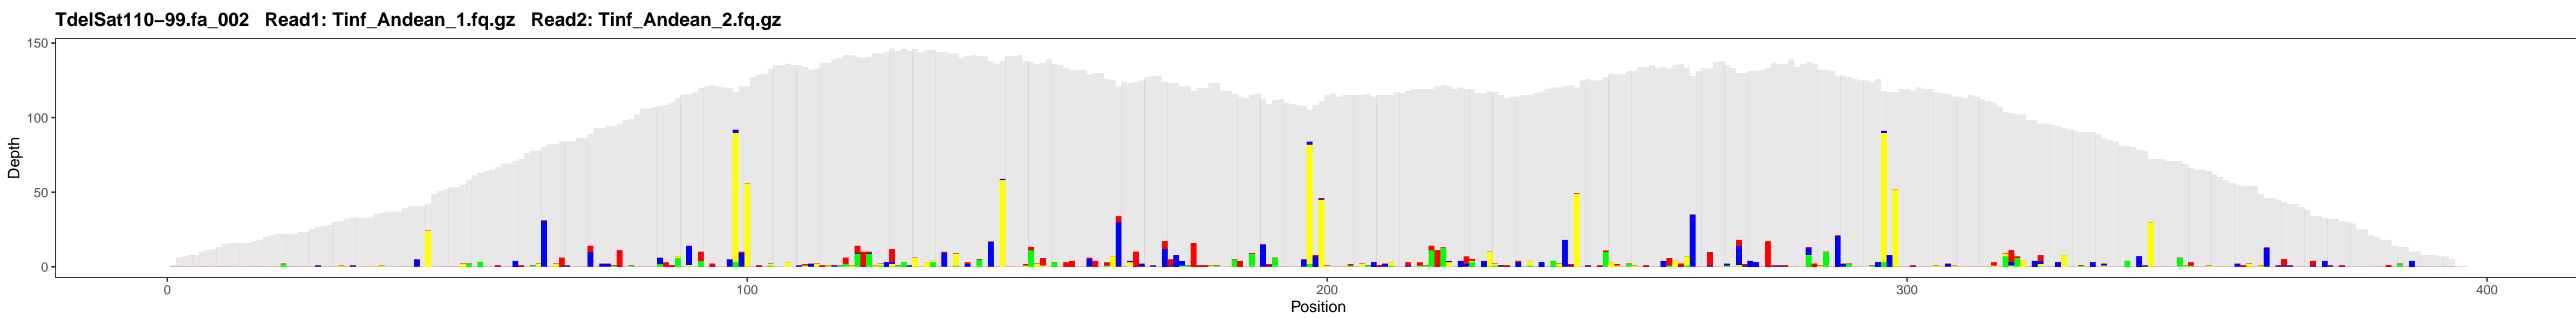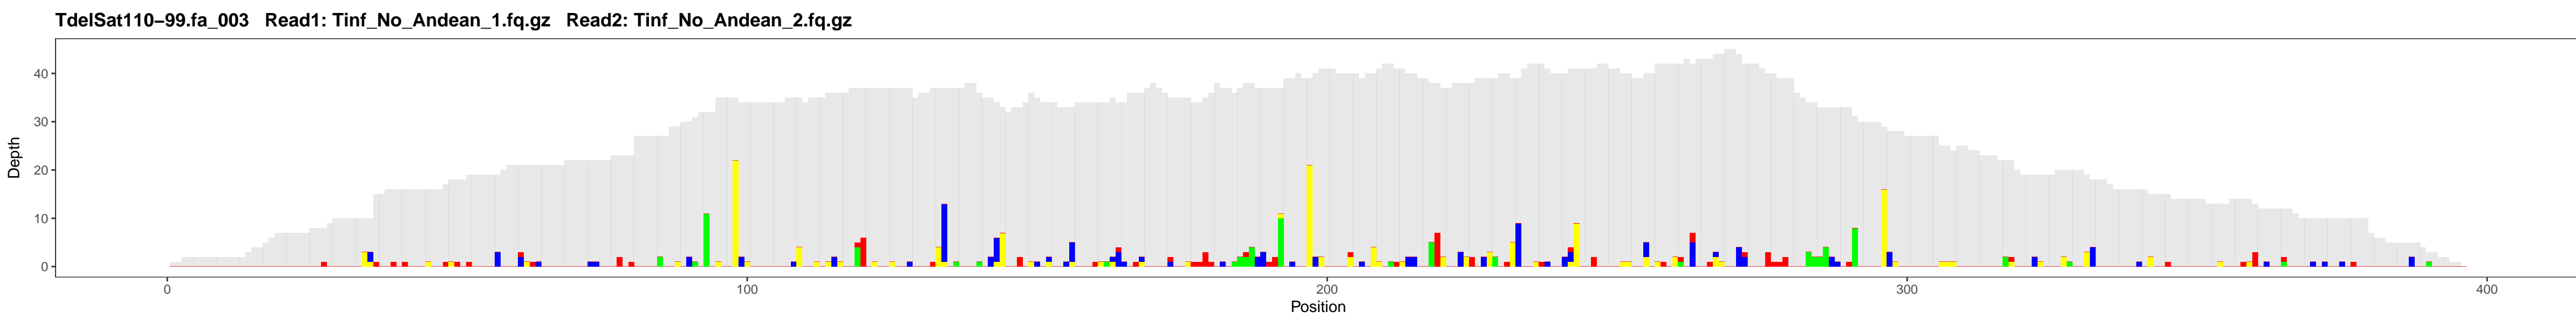



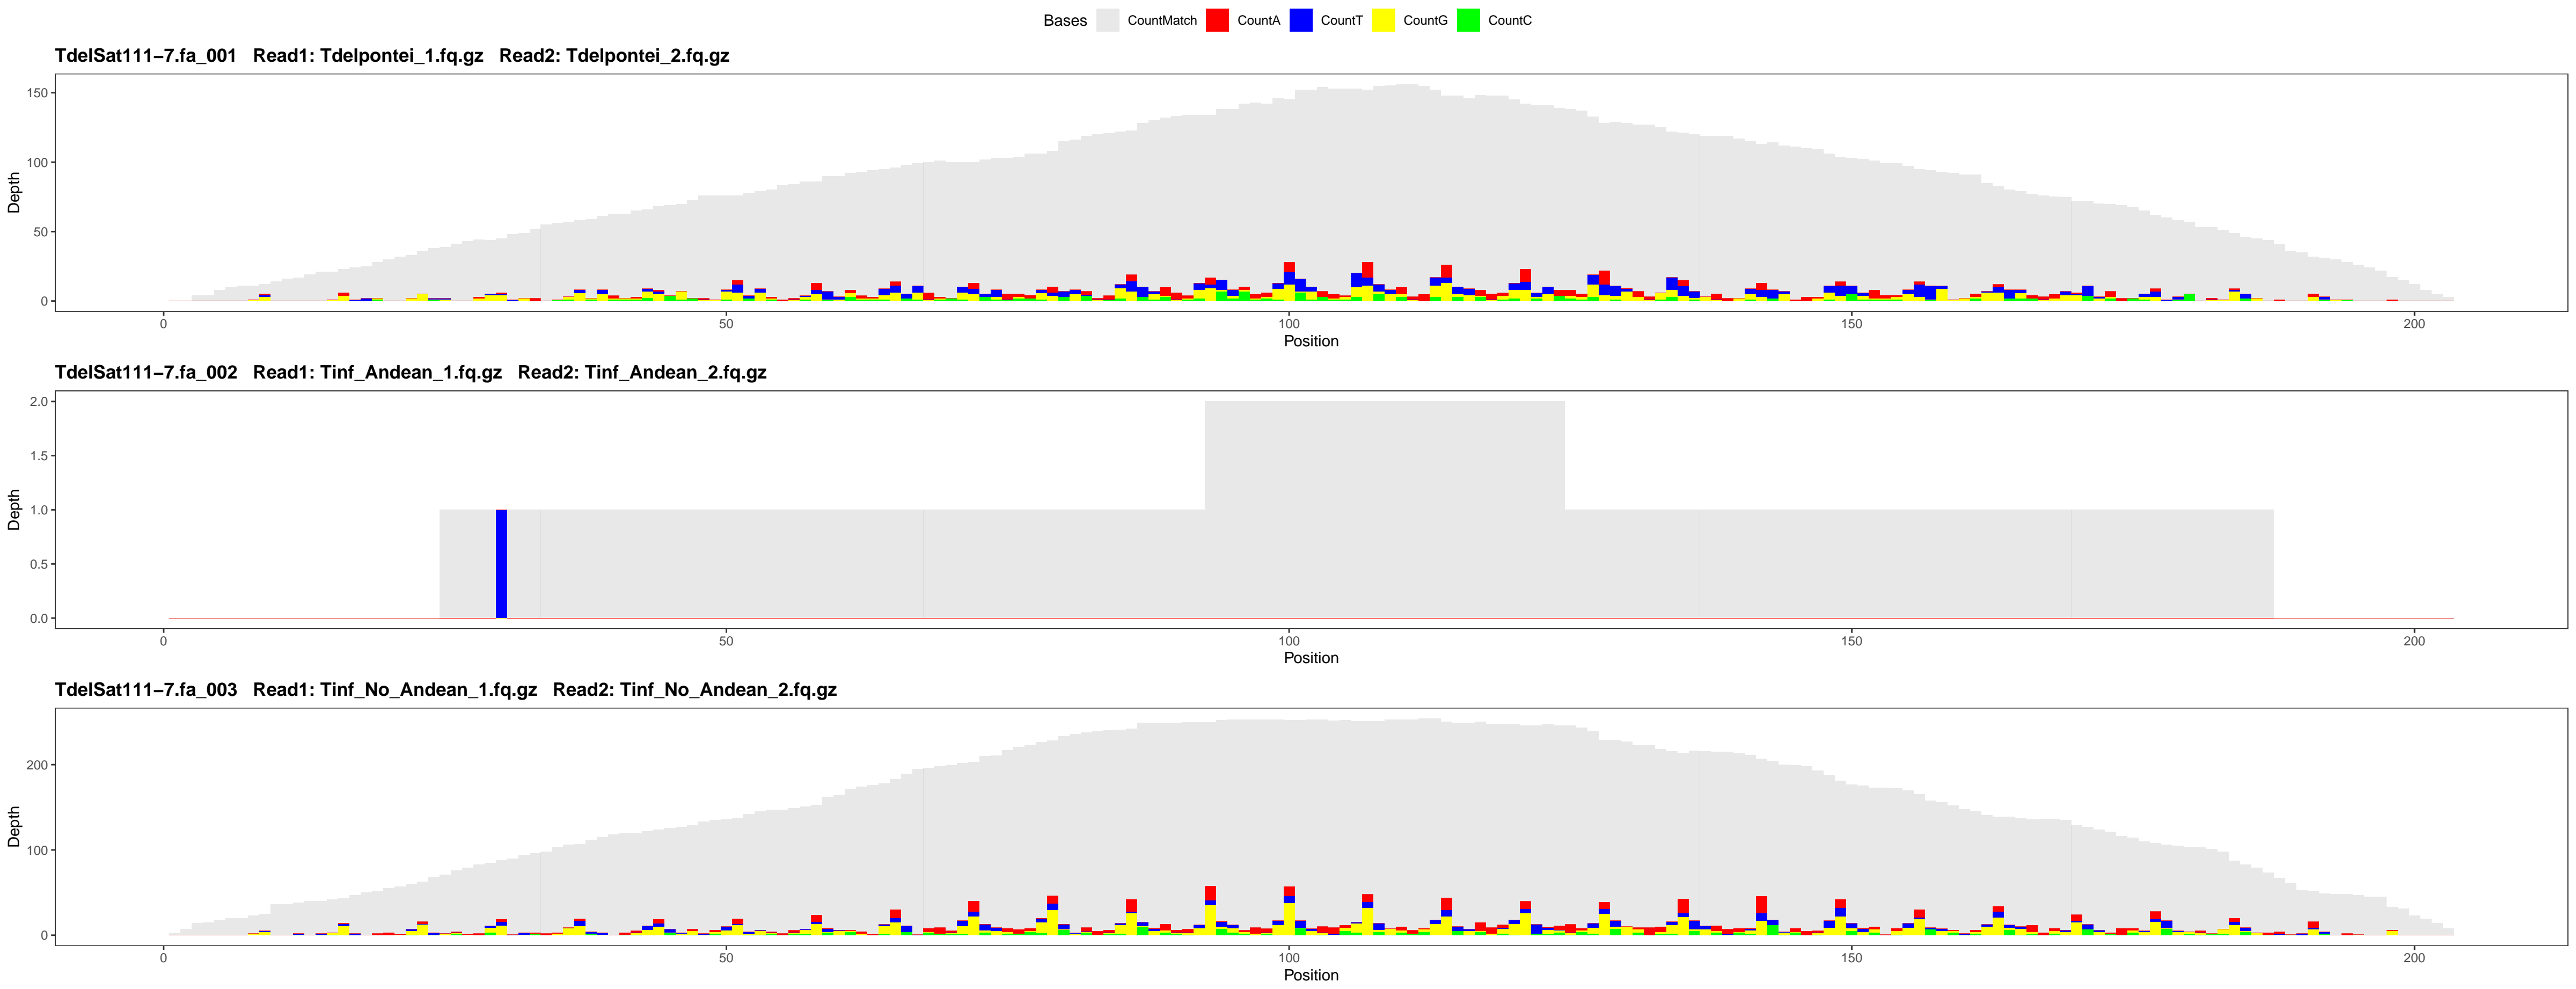

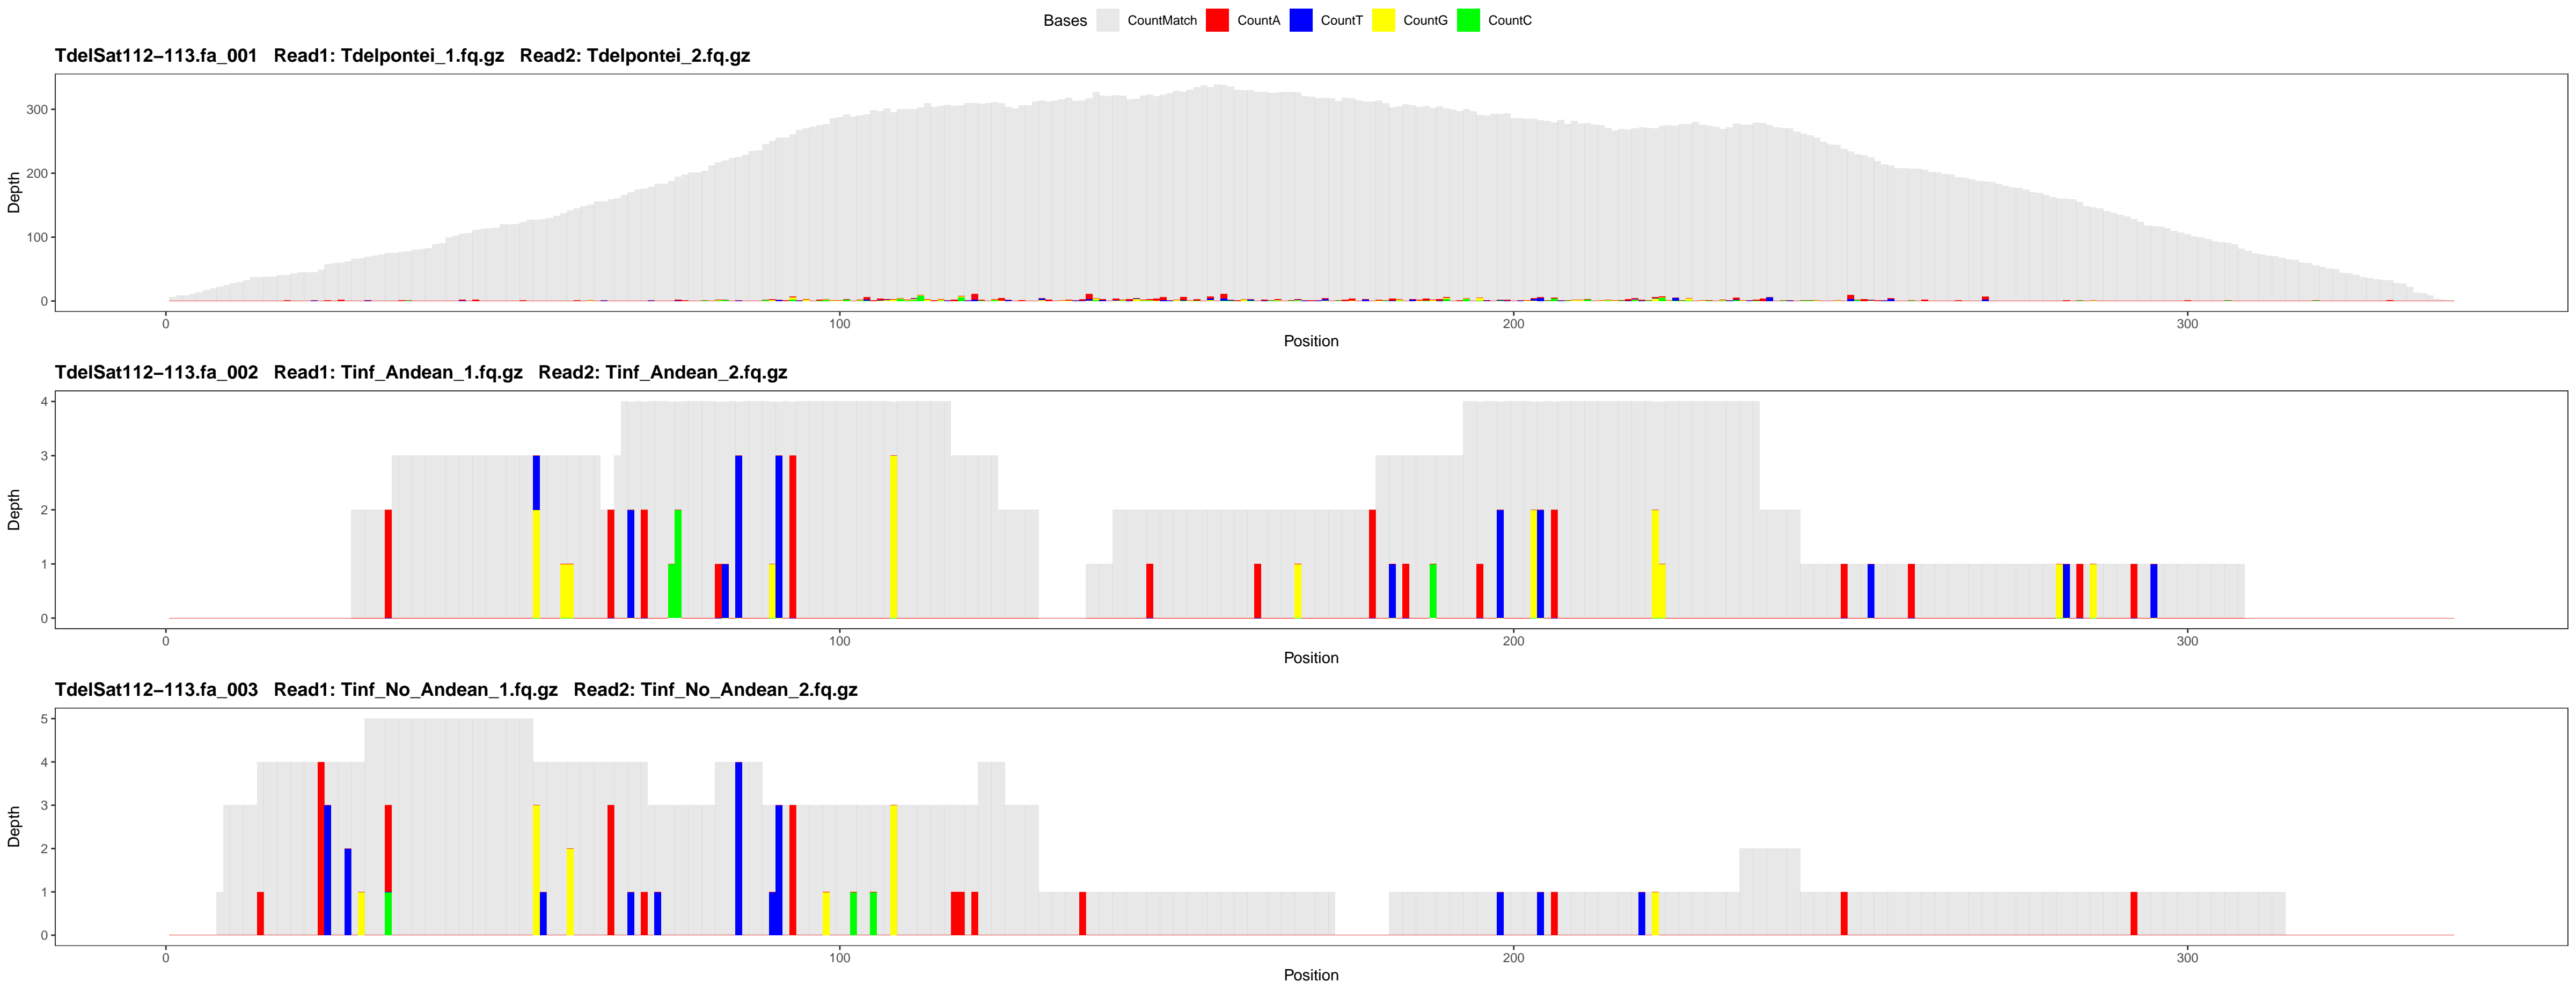

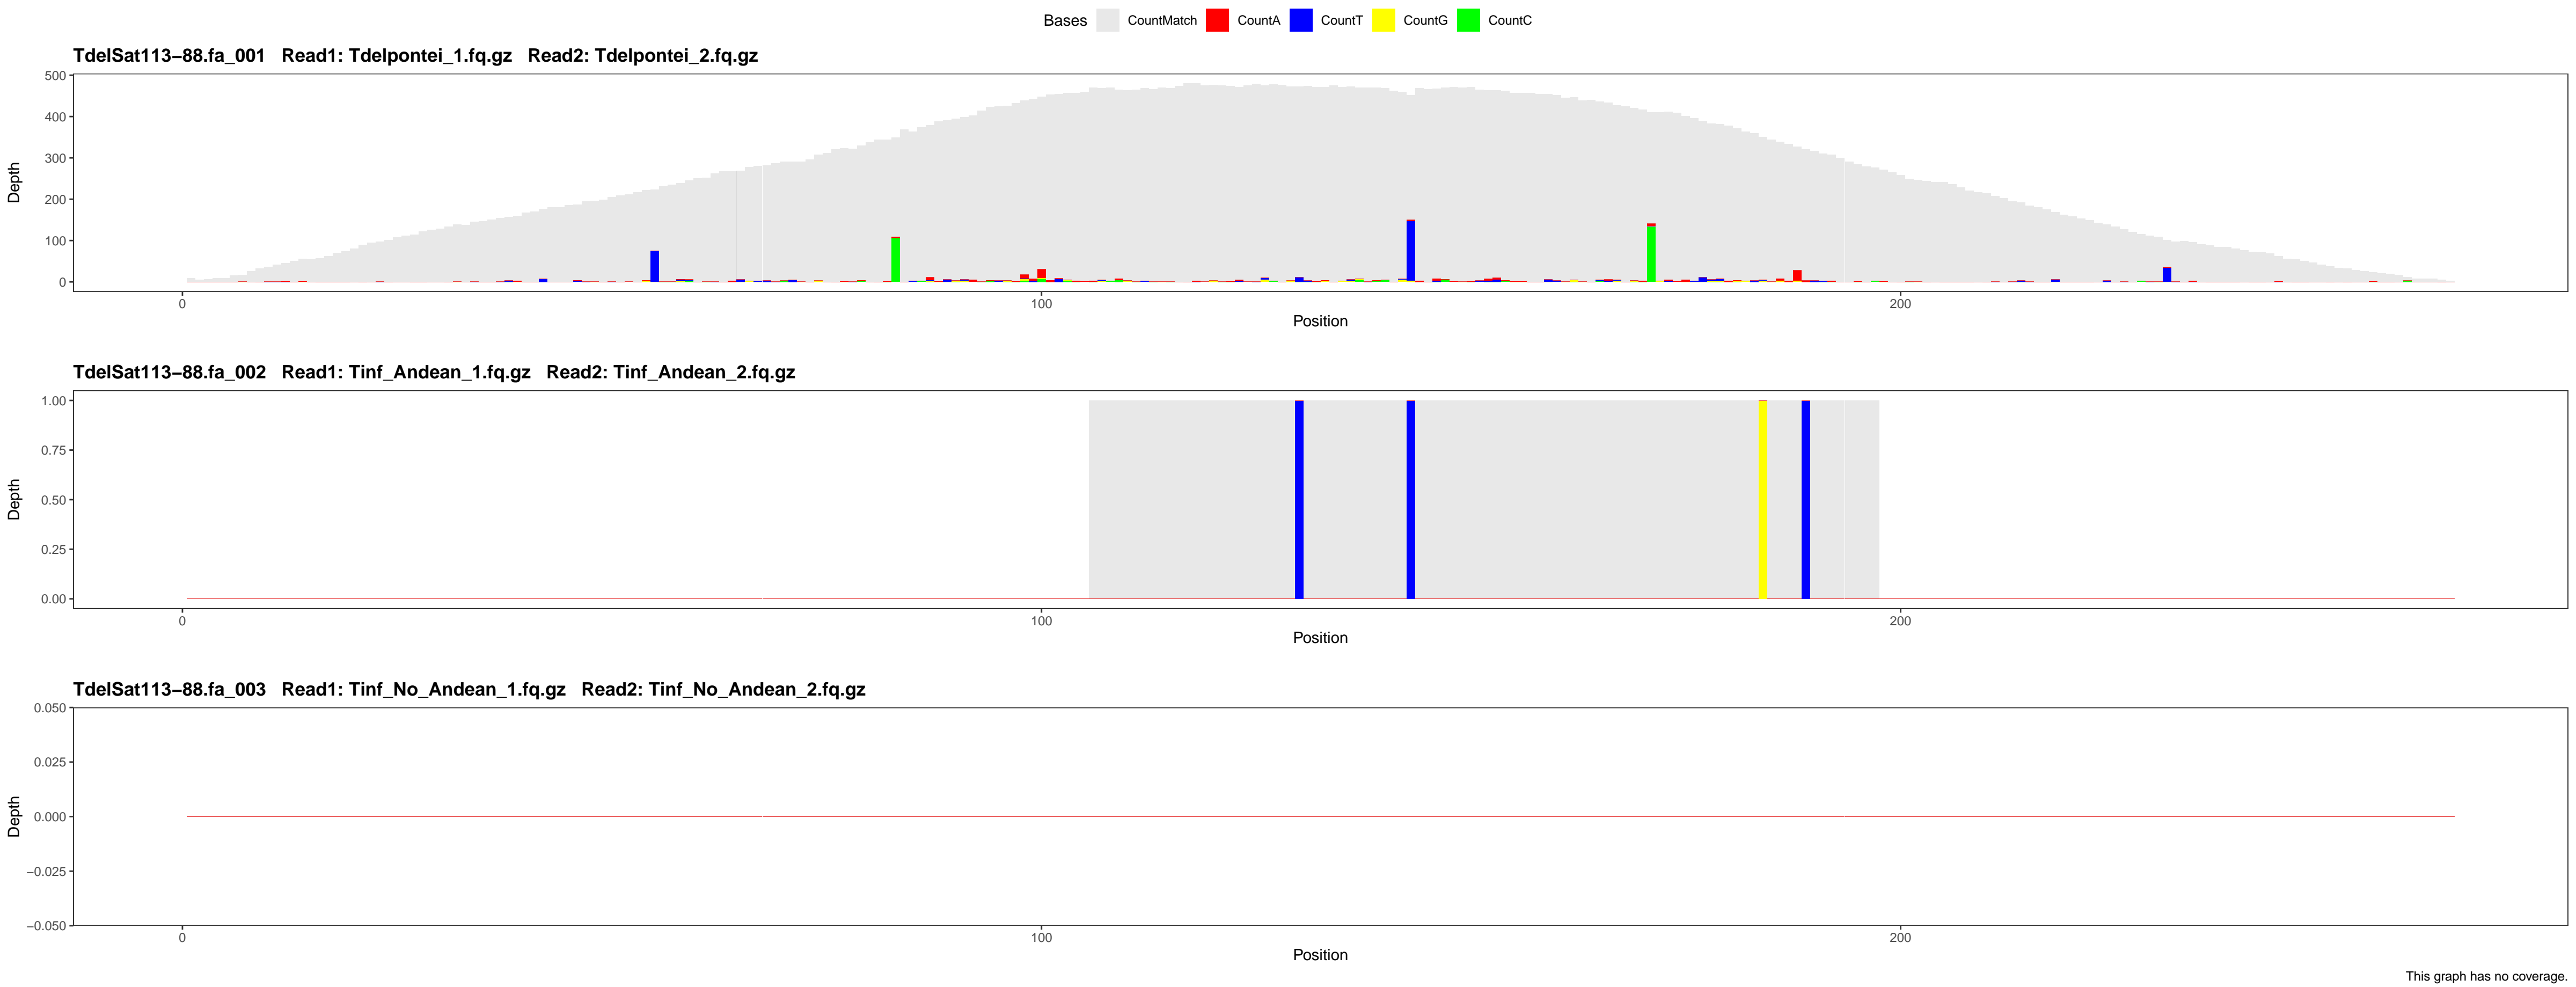

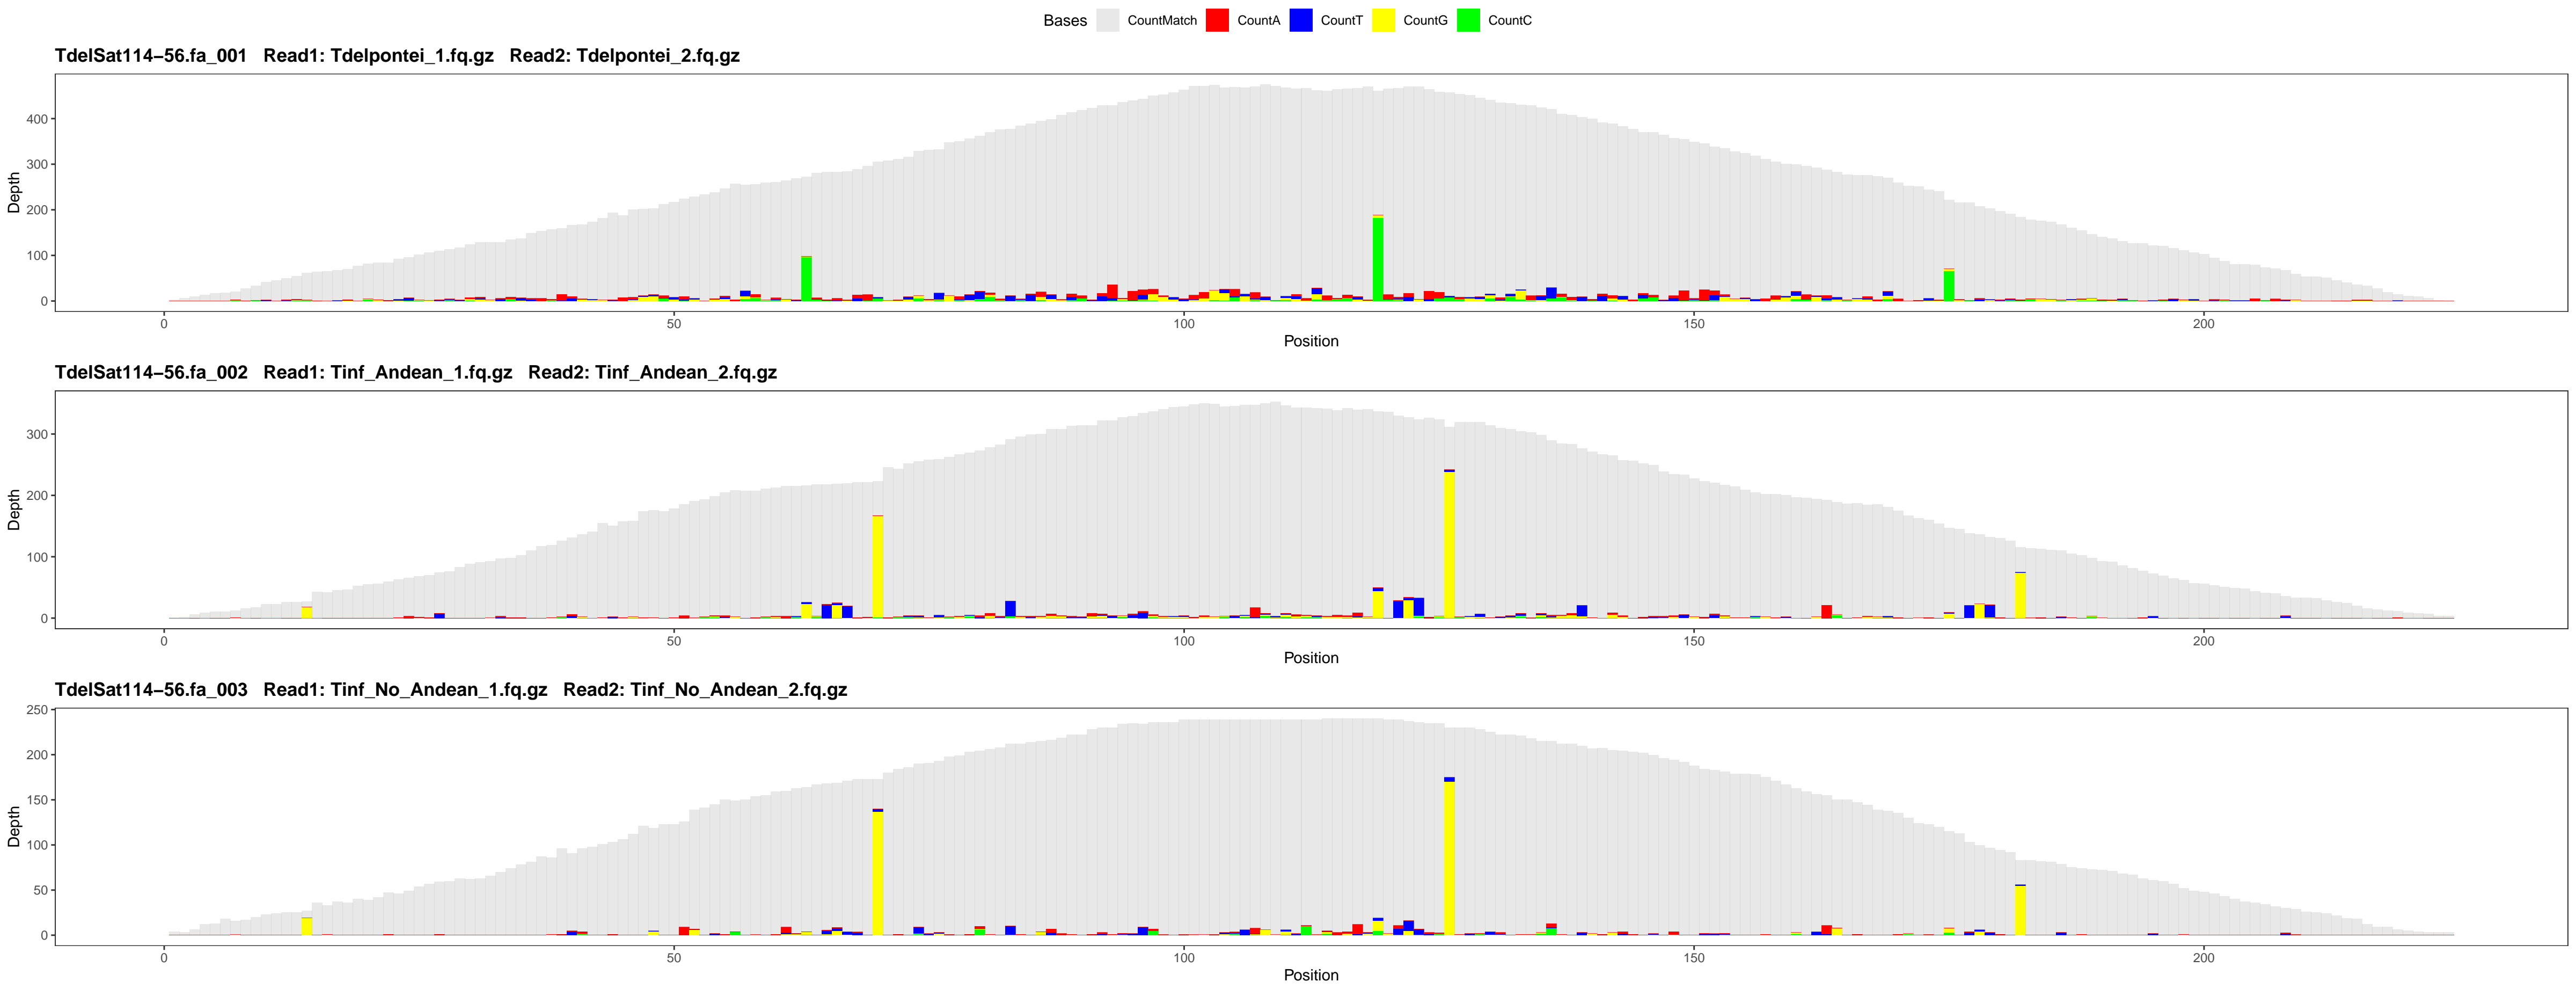

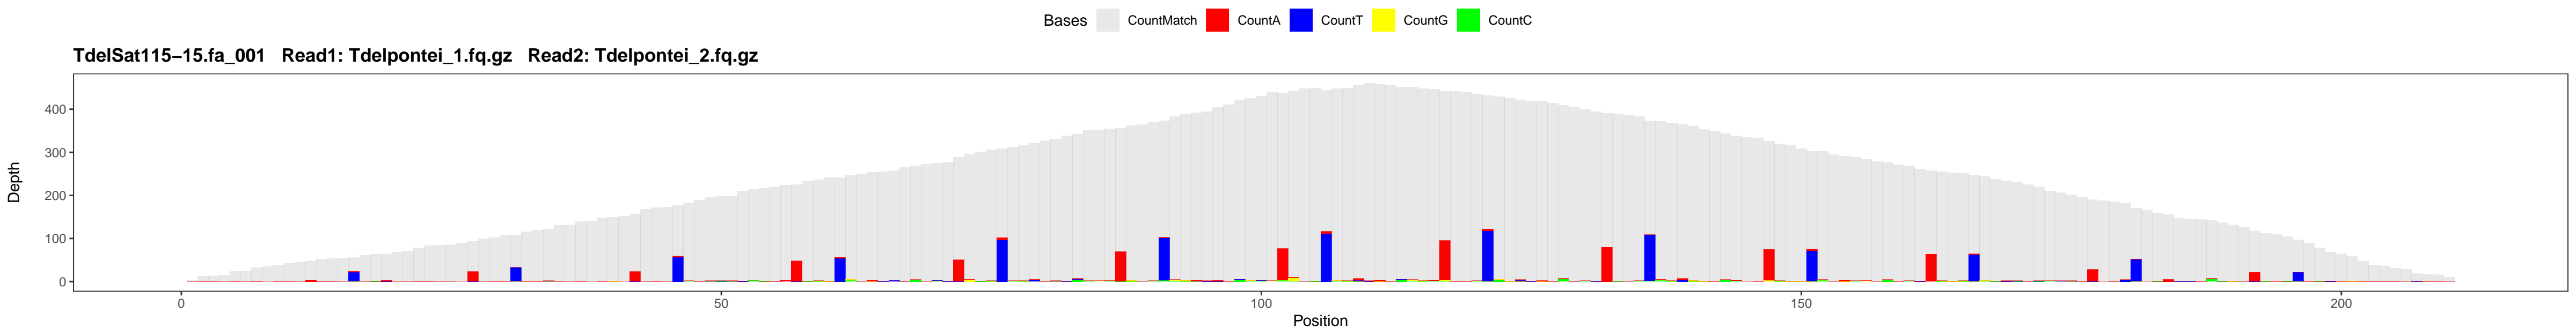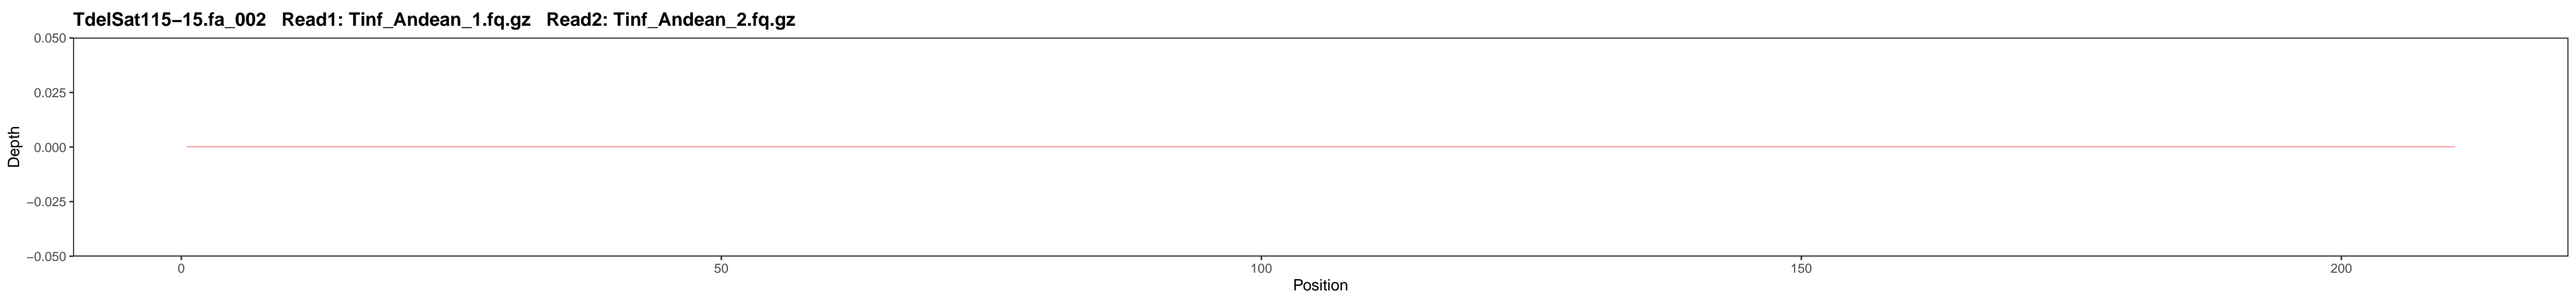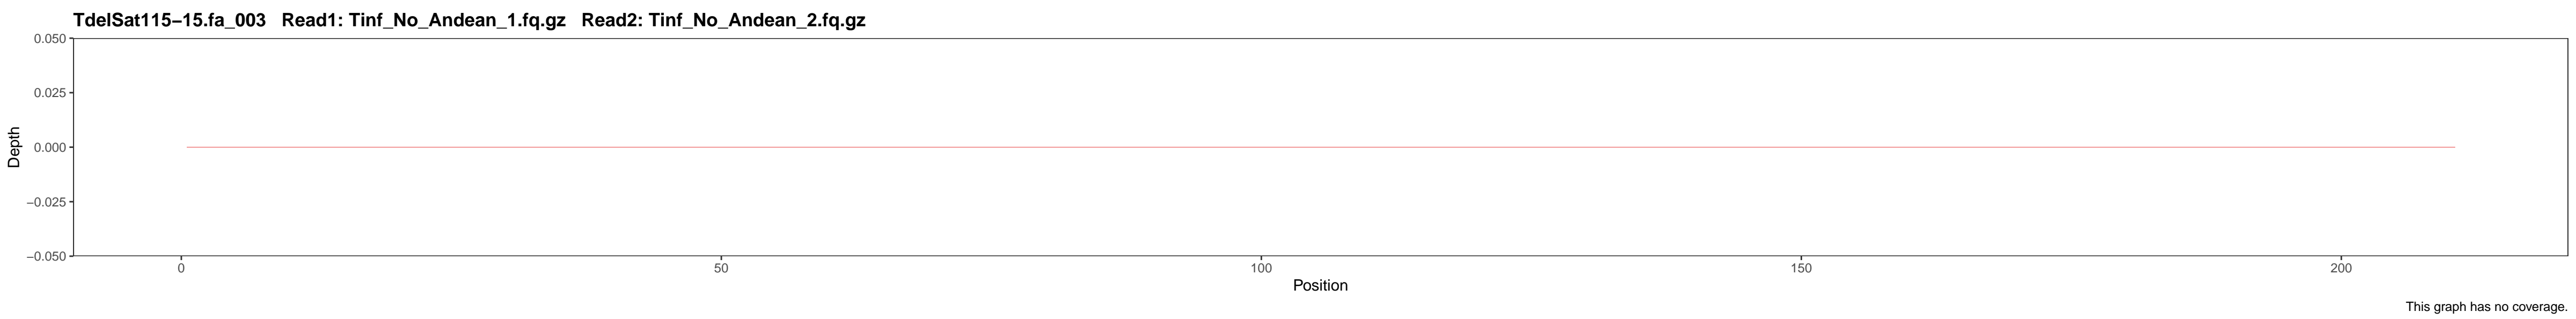

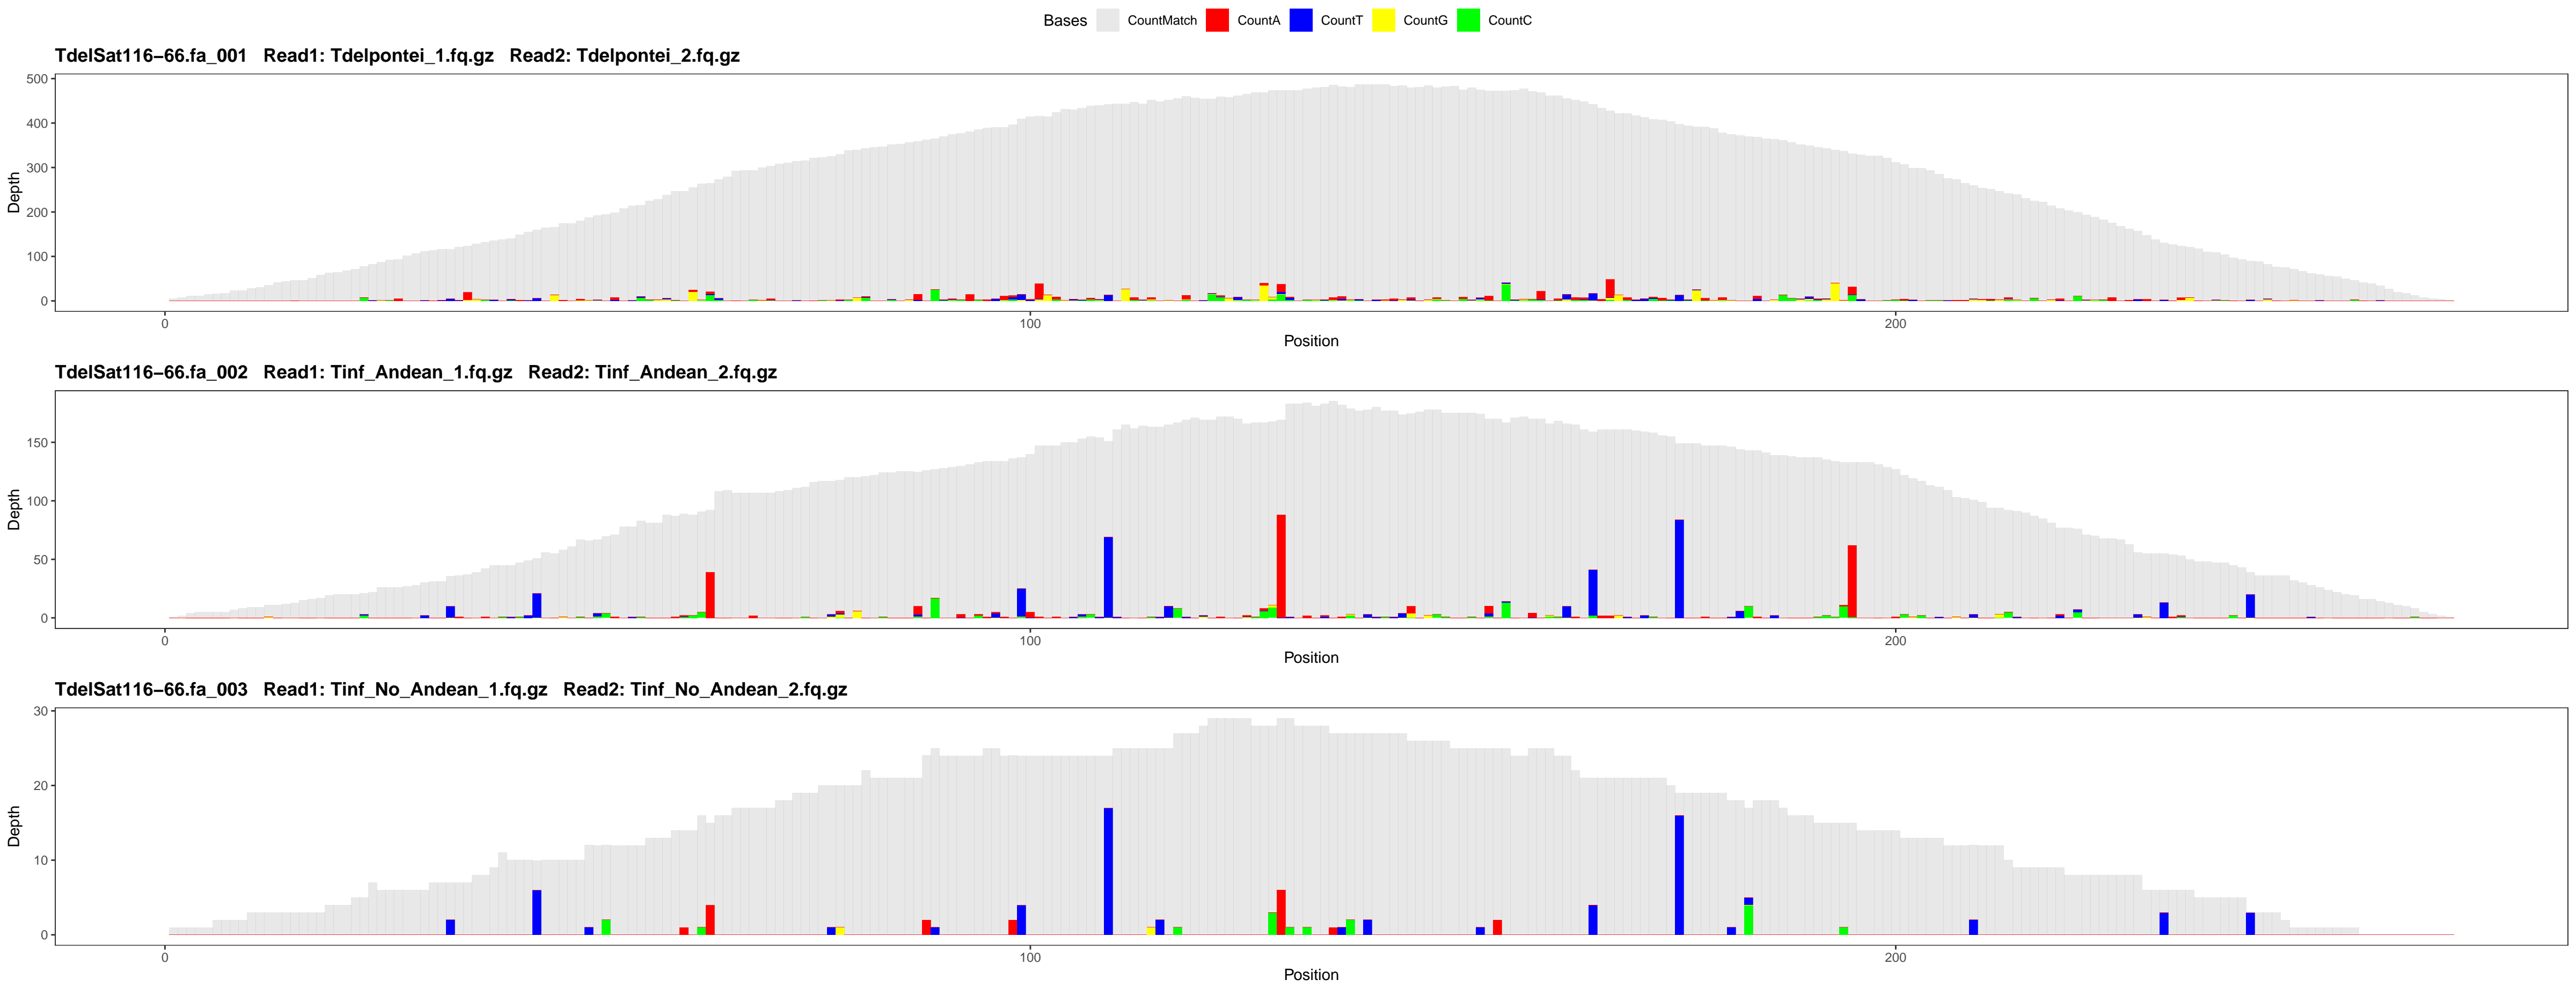

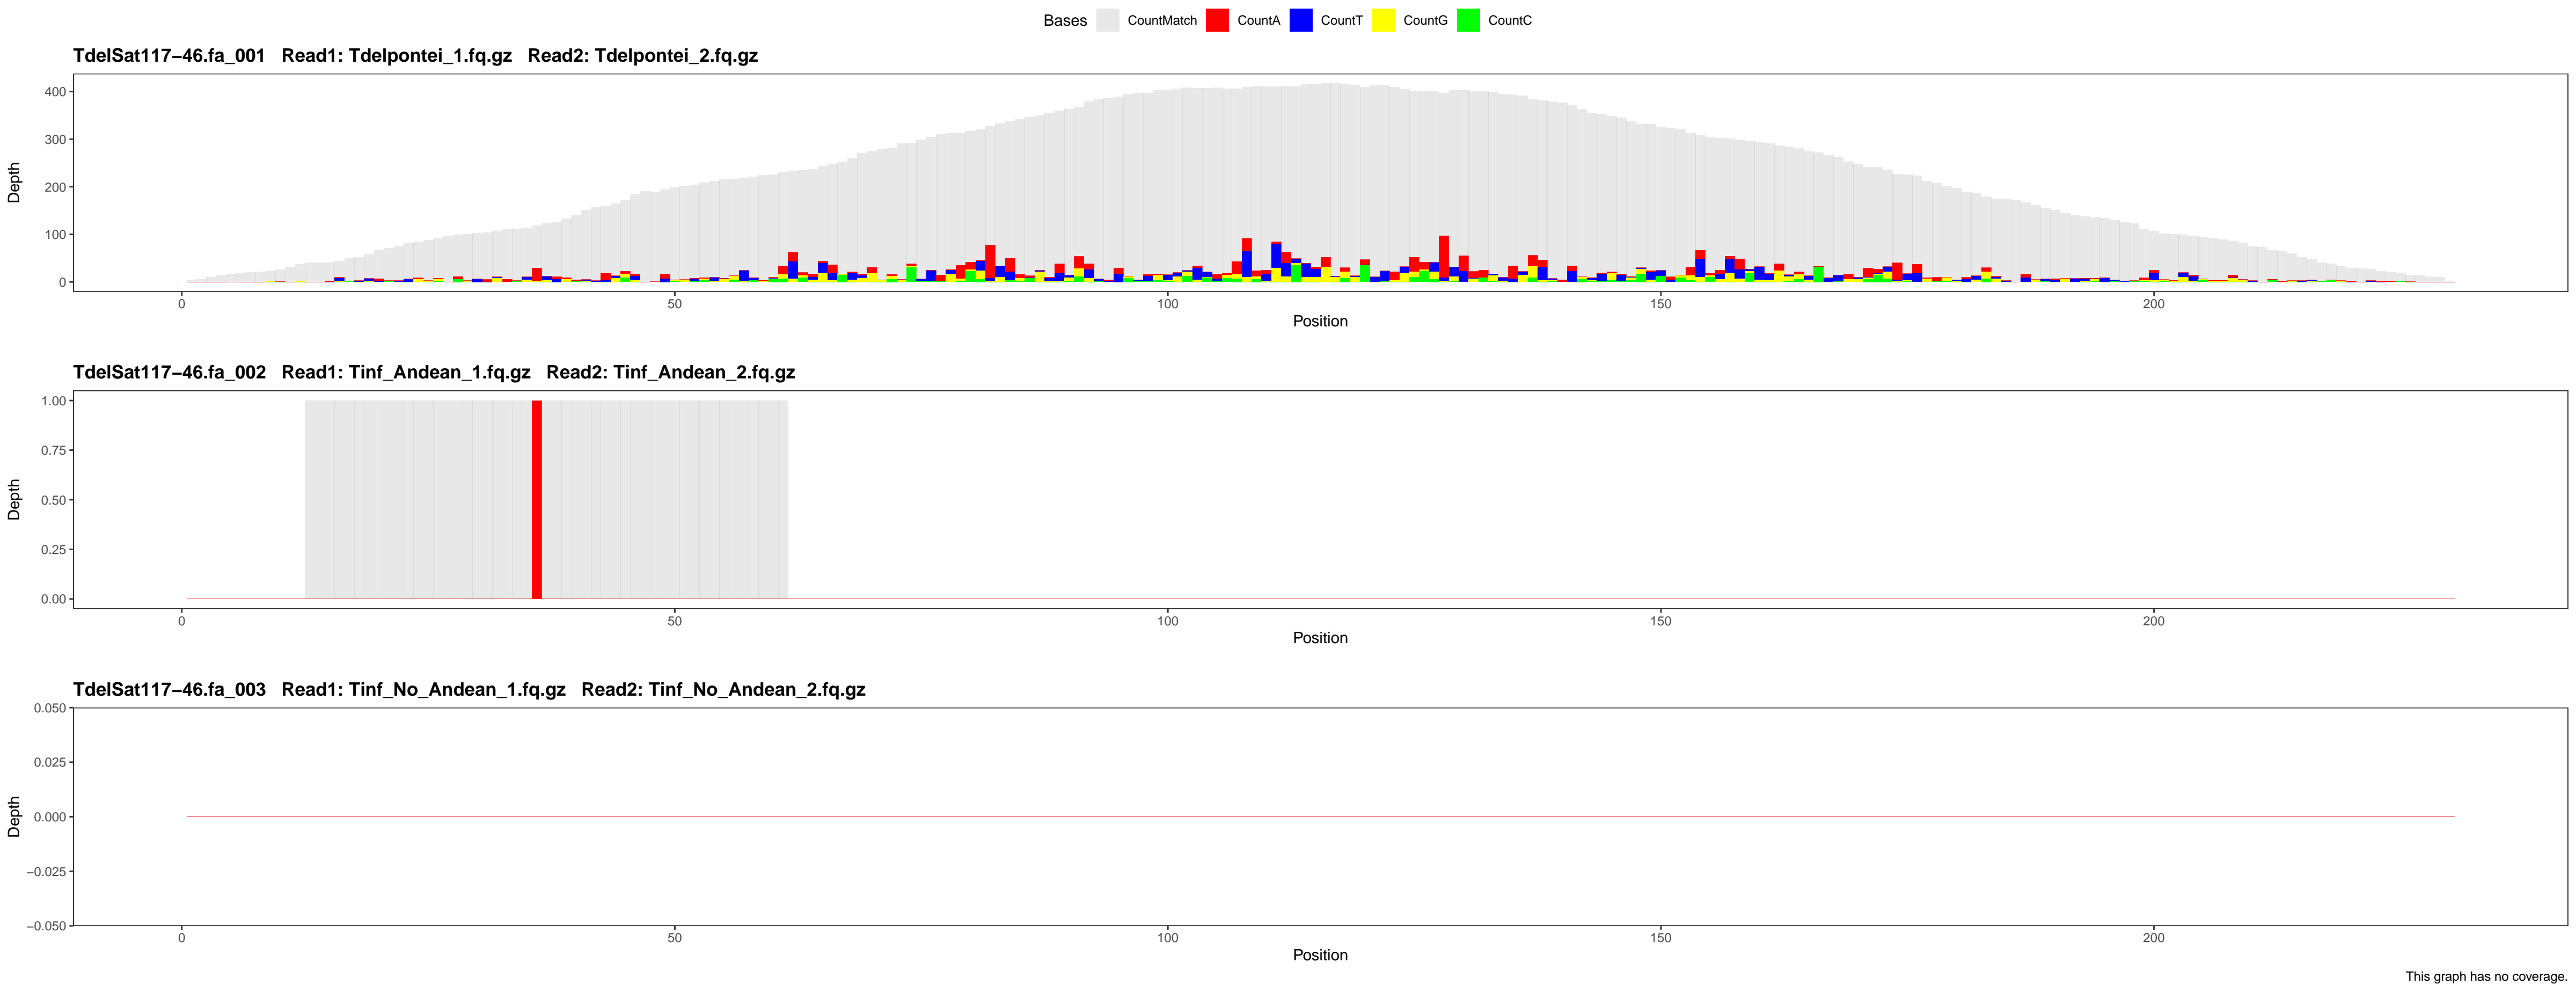

Bases CountMatch CountA CountT CountG CountC

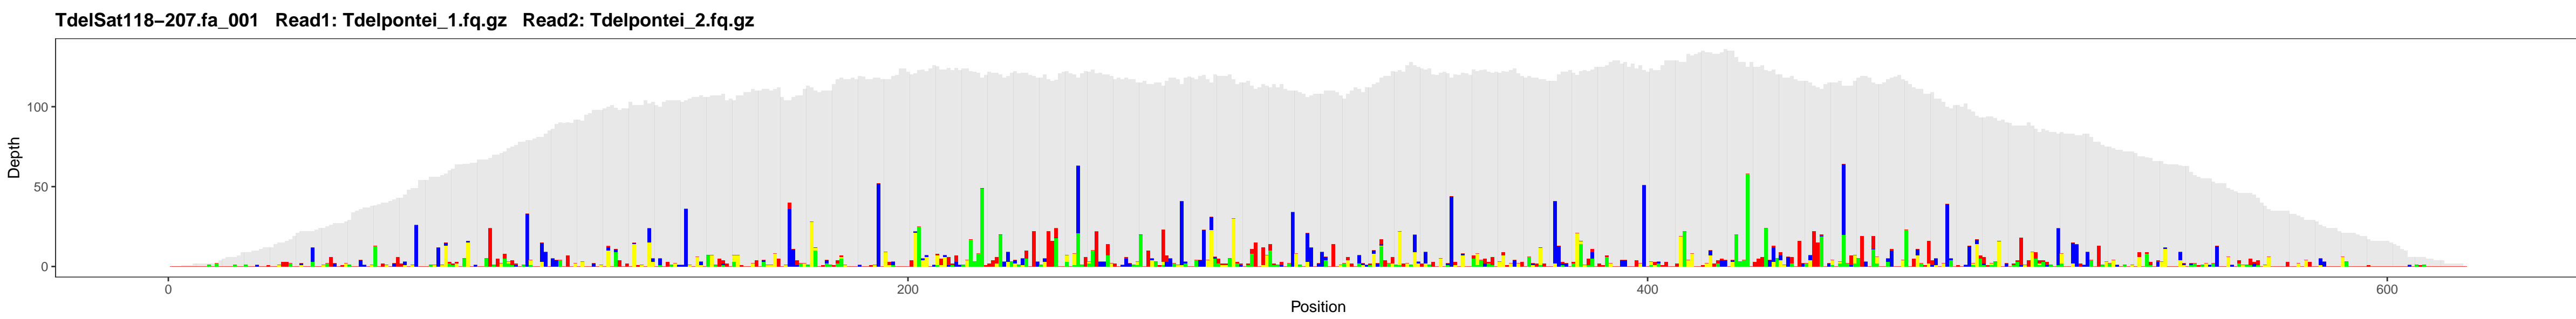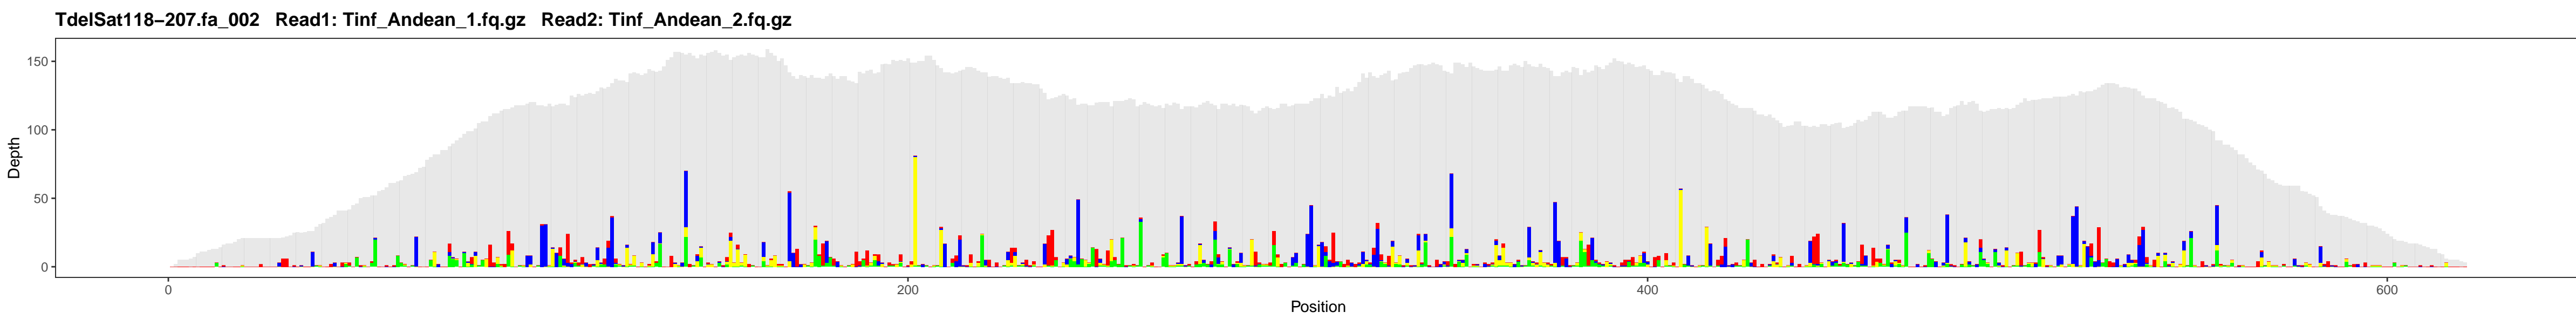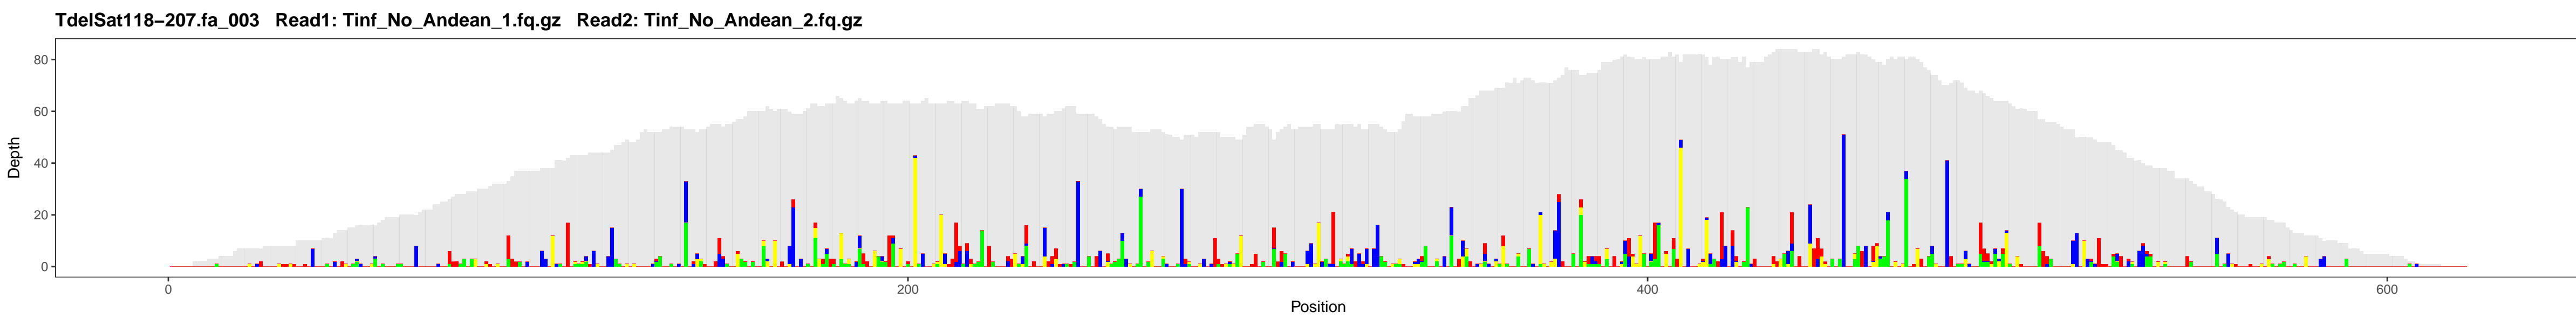



Bases CountMatch CountA CountT CountG CountC

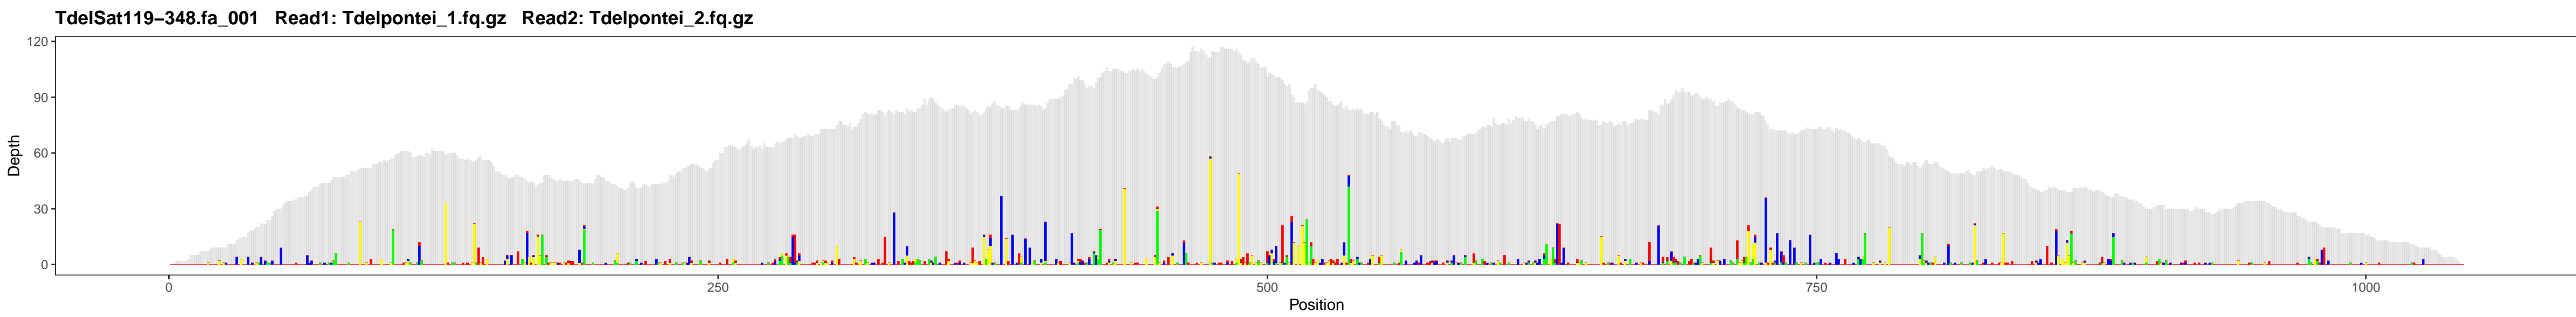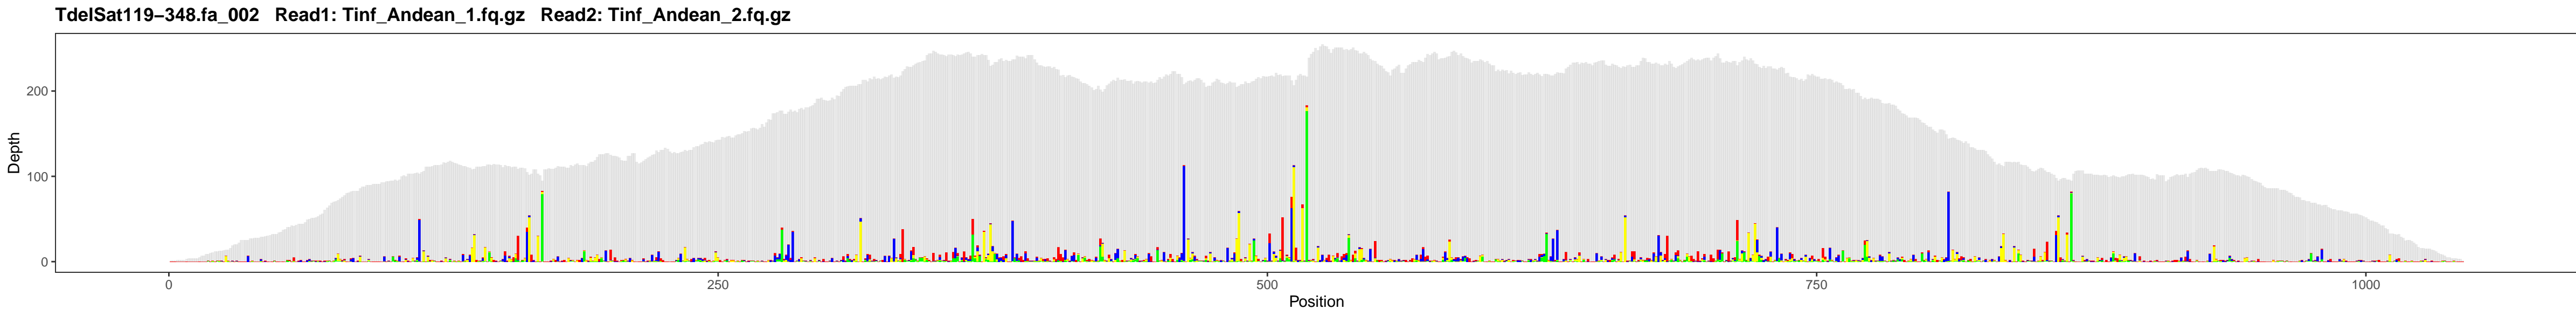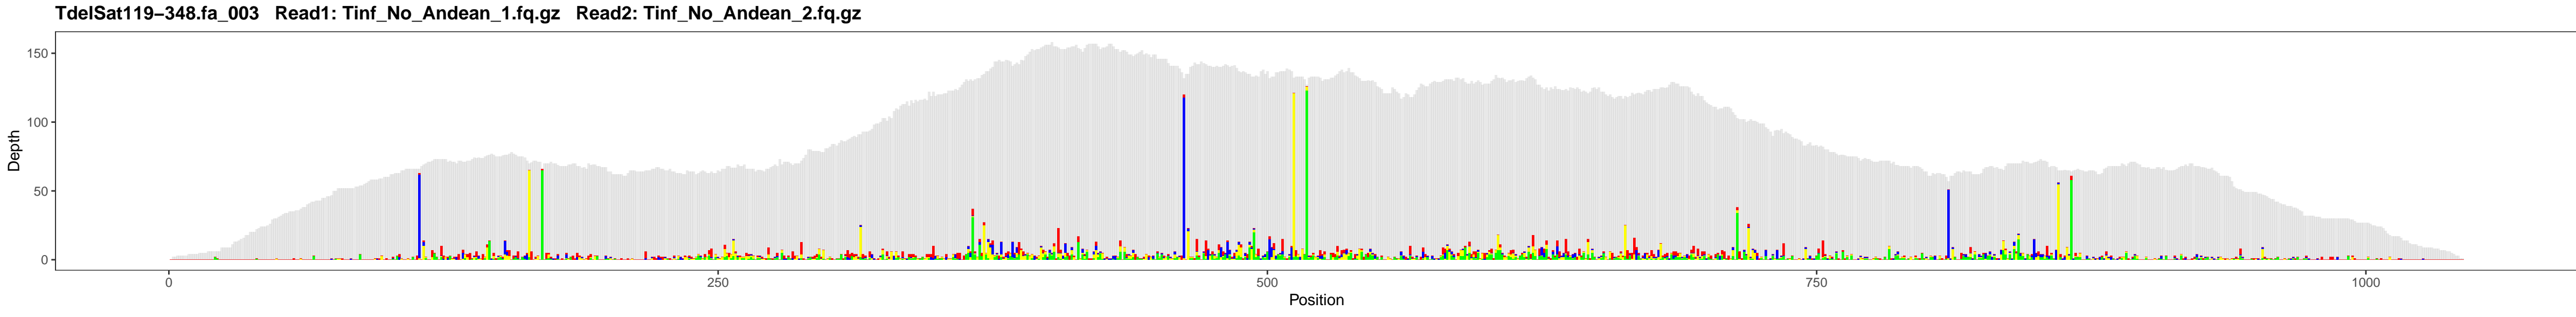

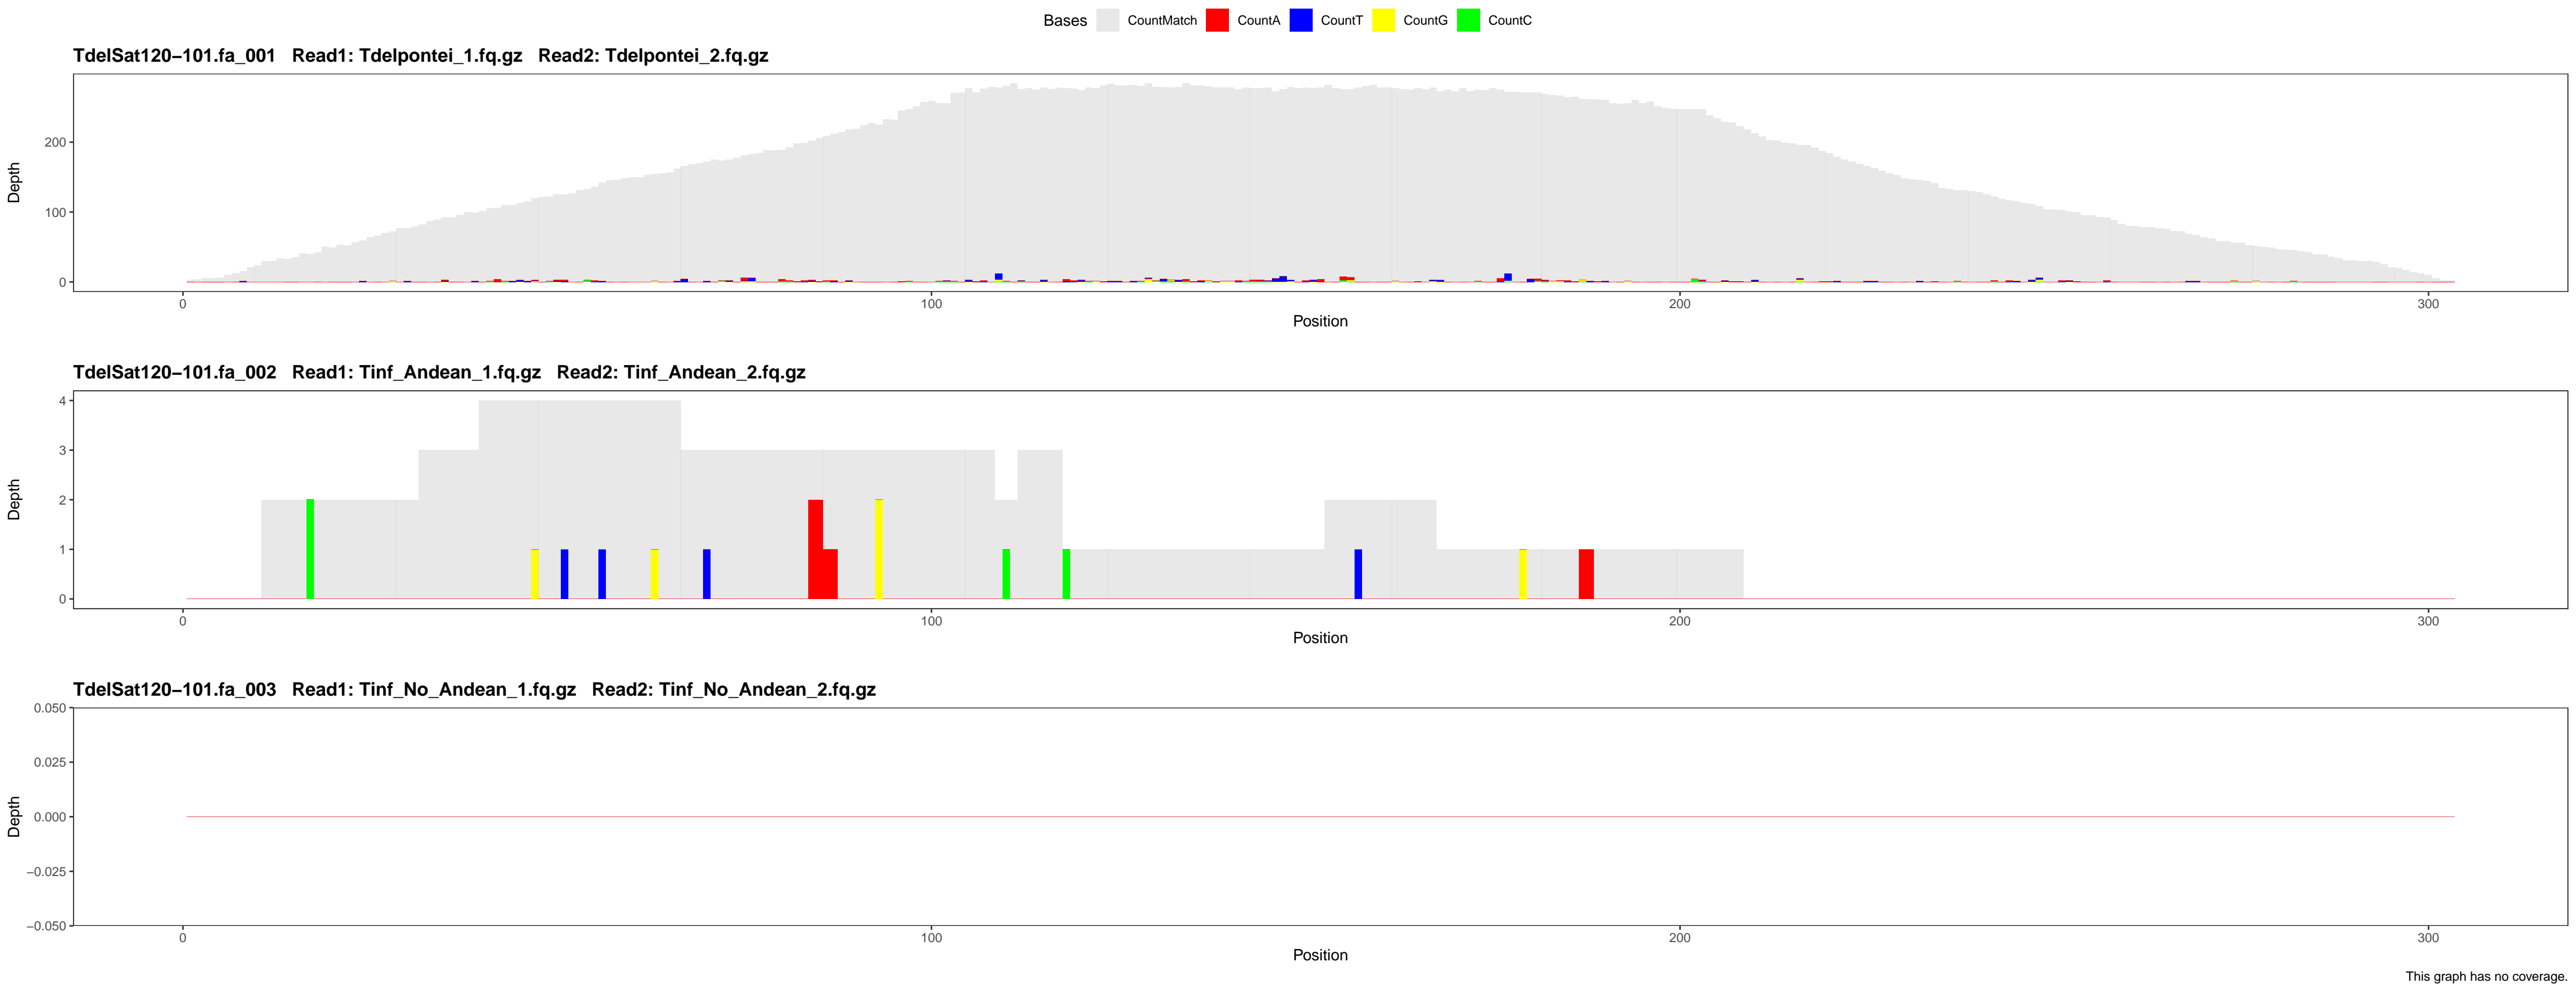

Bases CountMatch CountA CountT CountG CountC

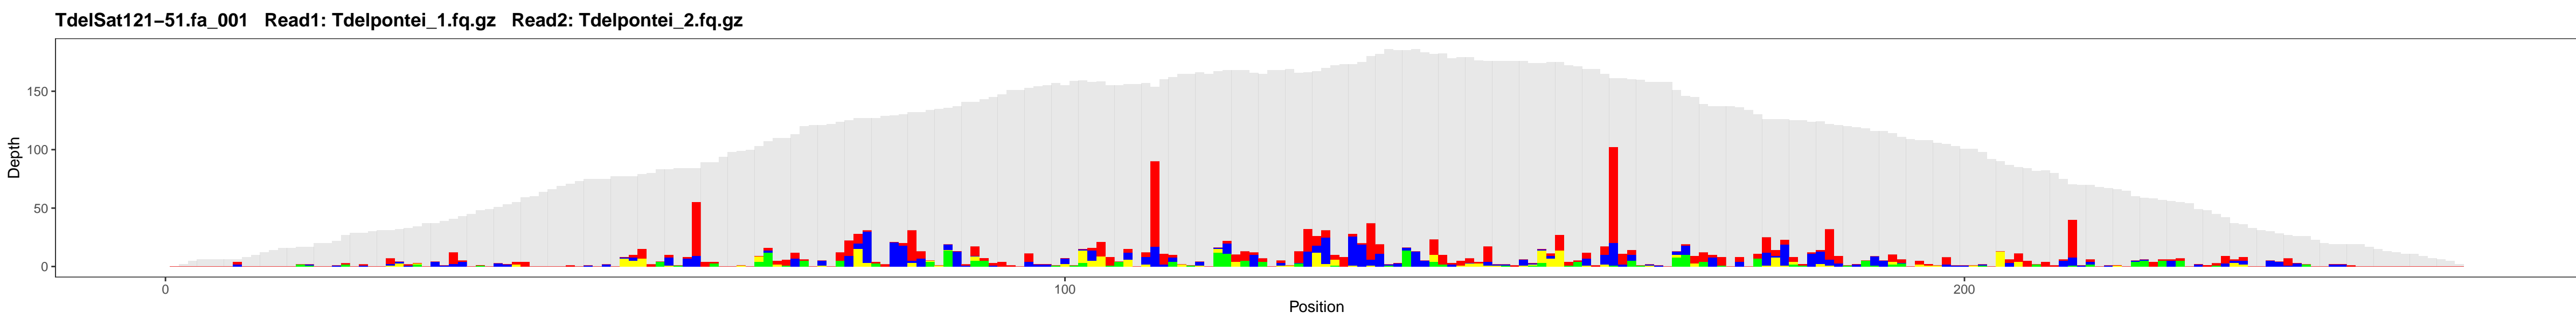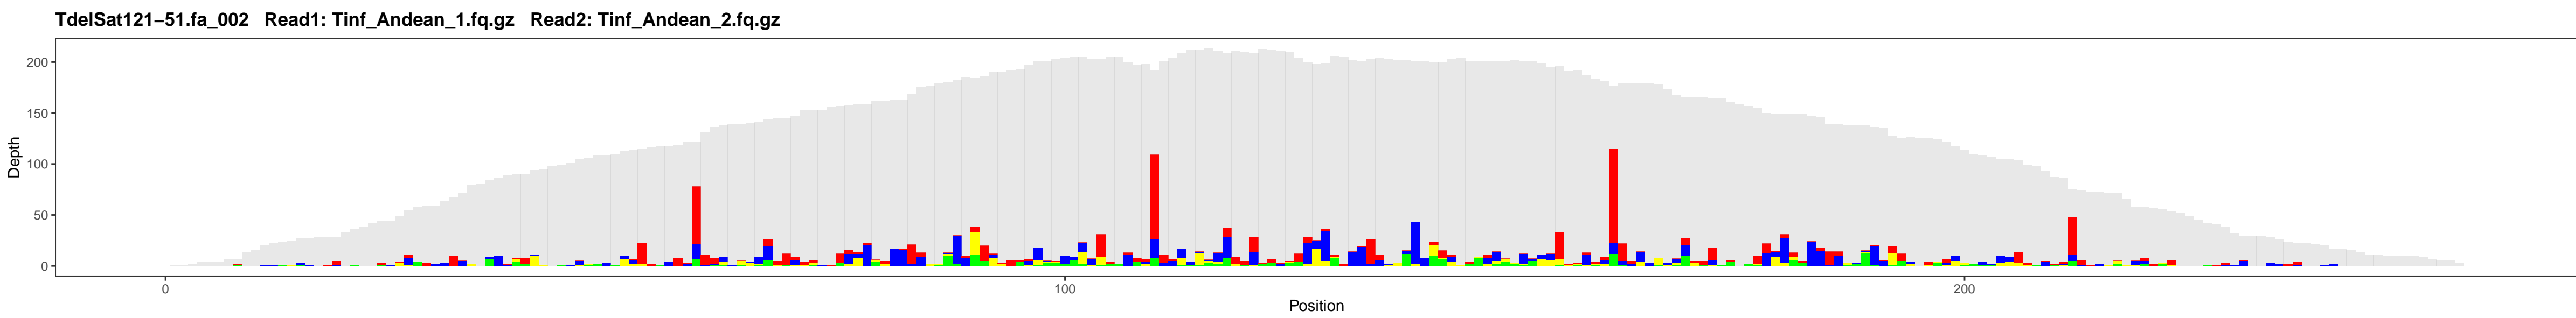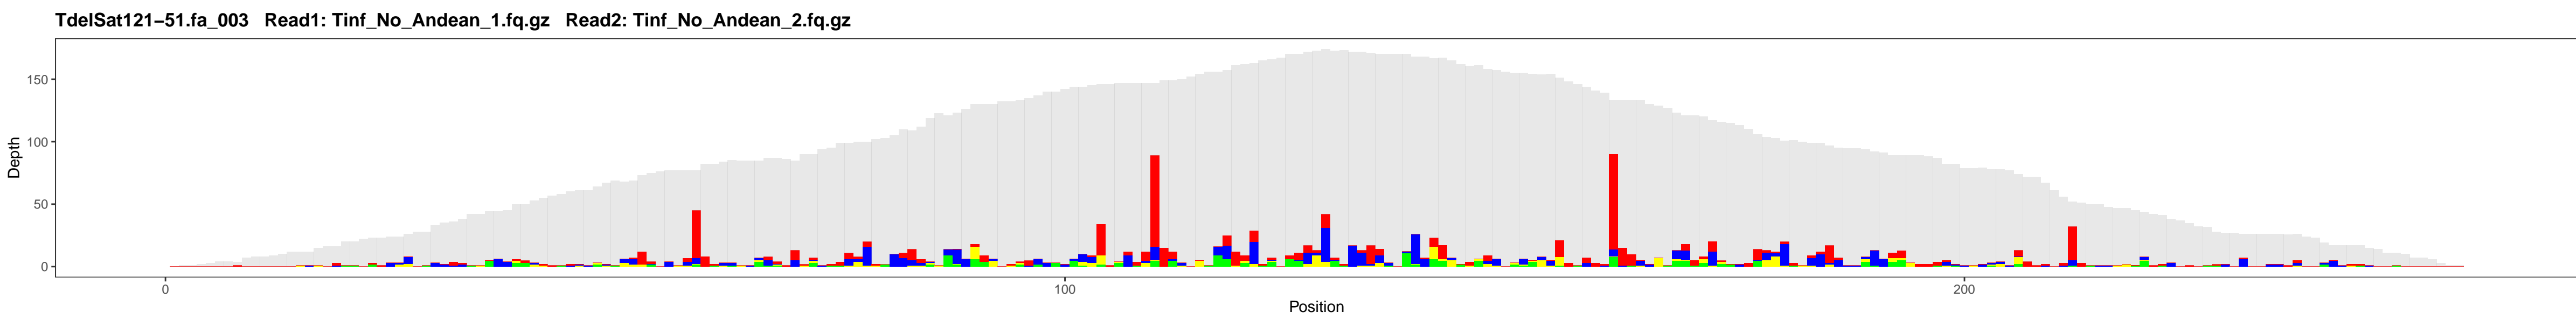

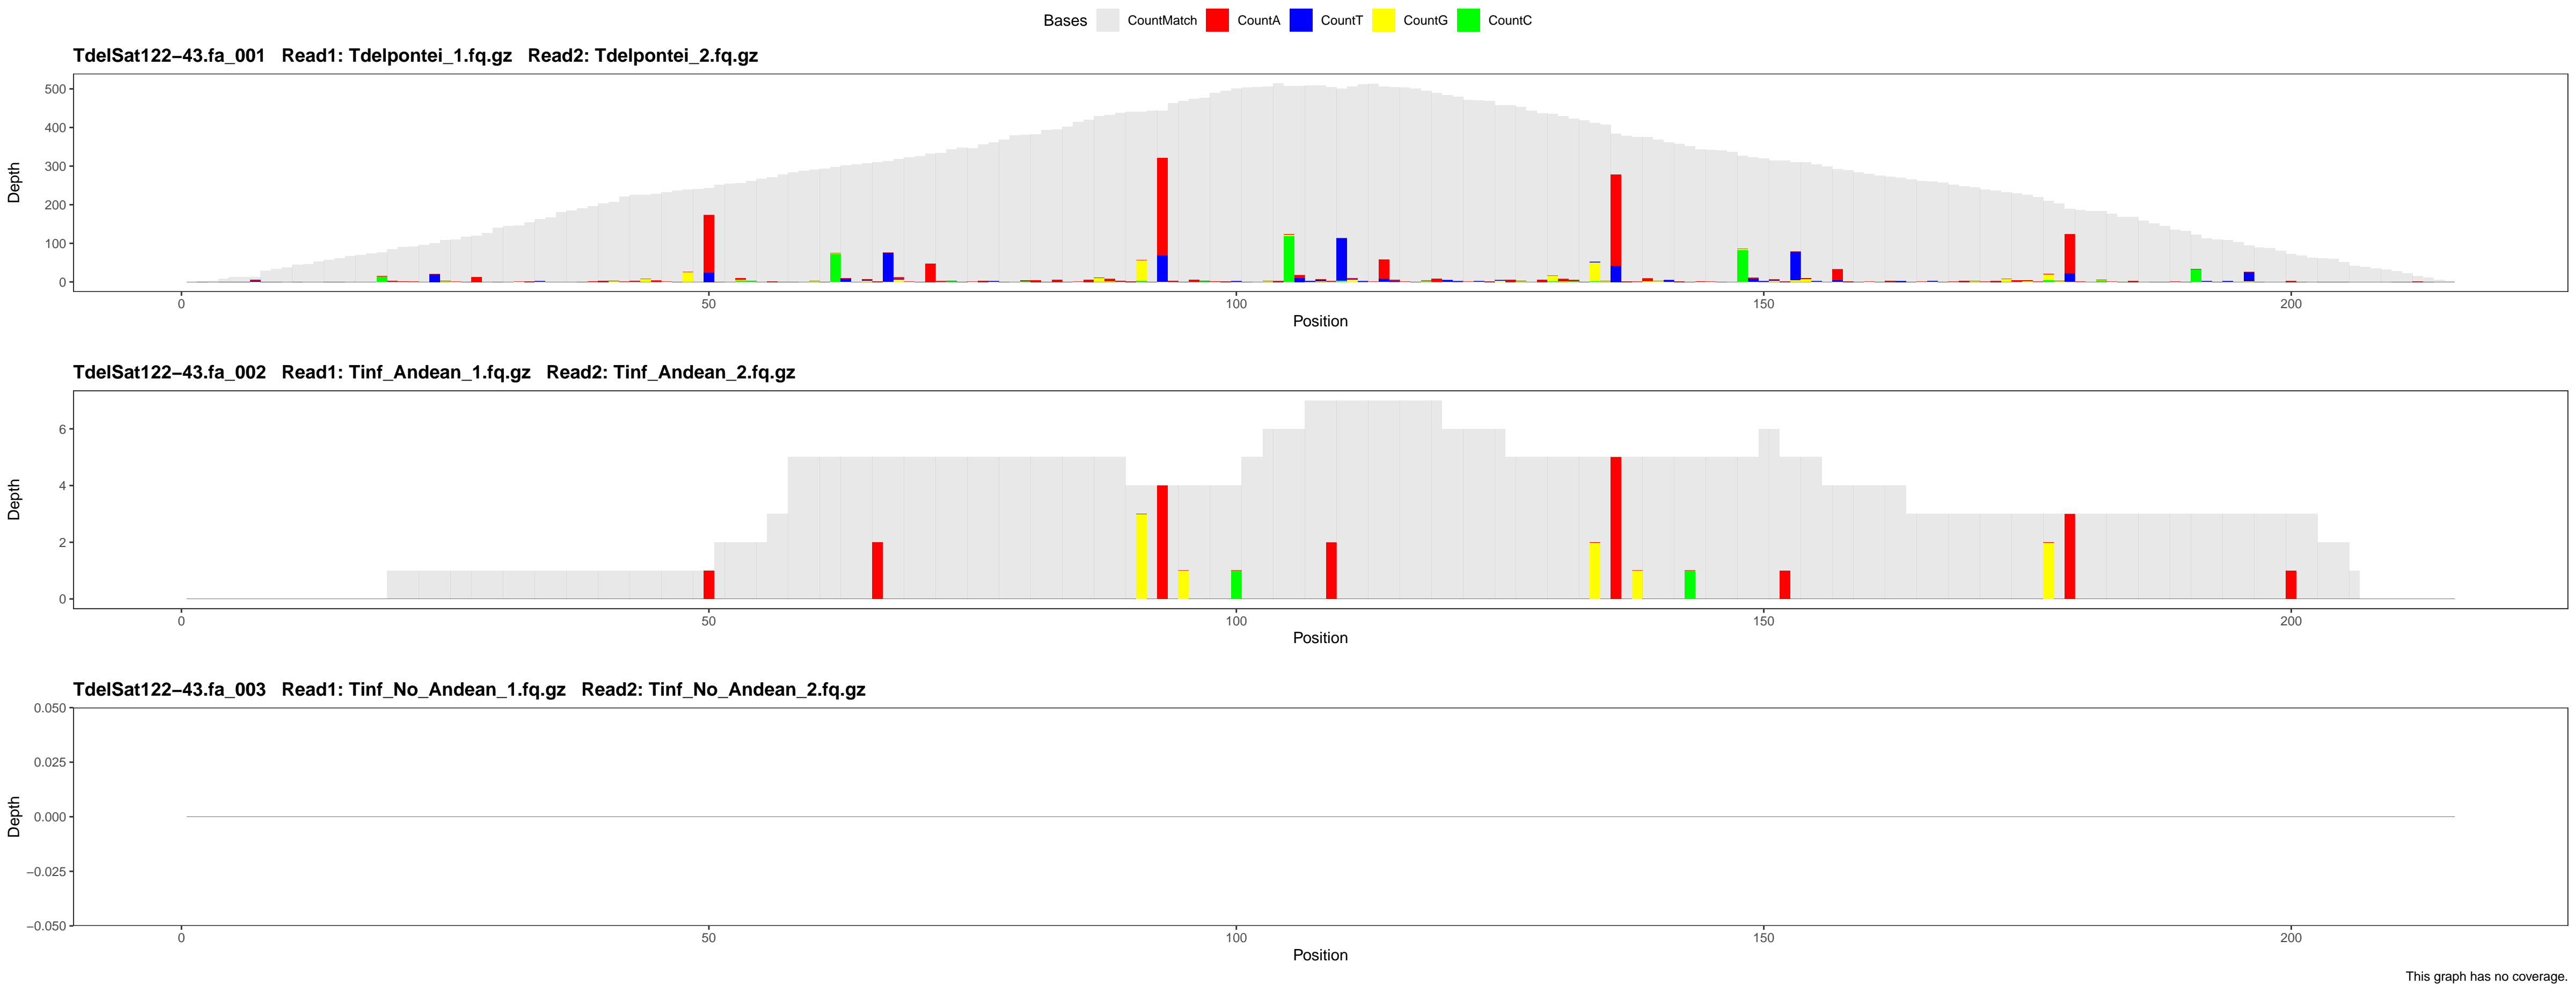

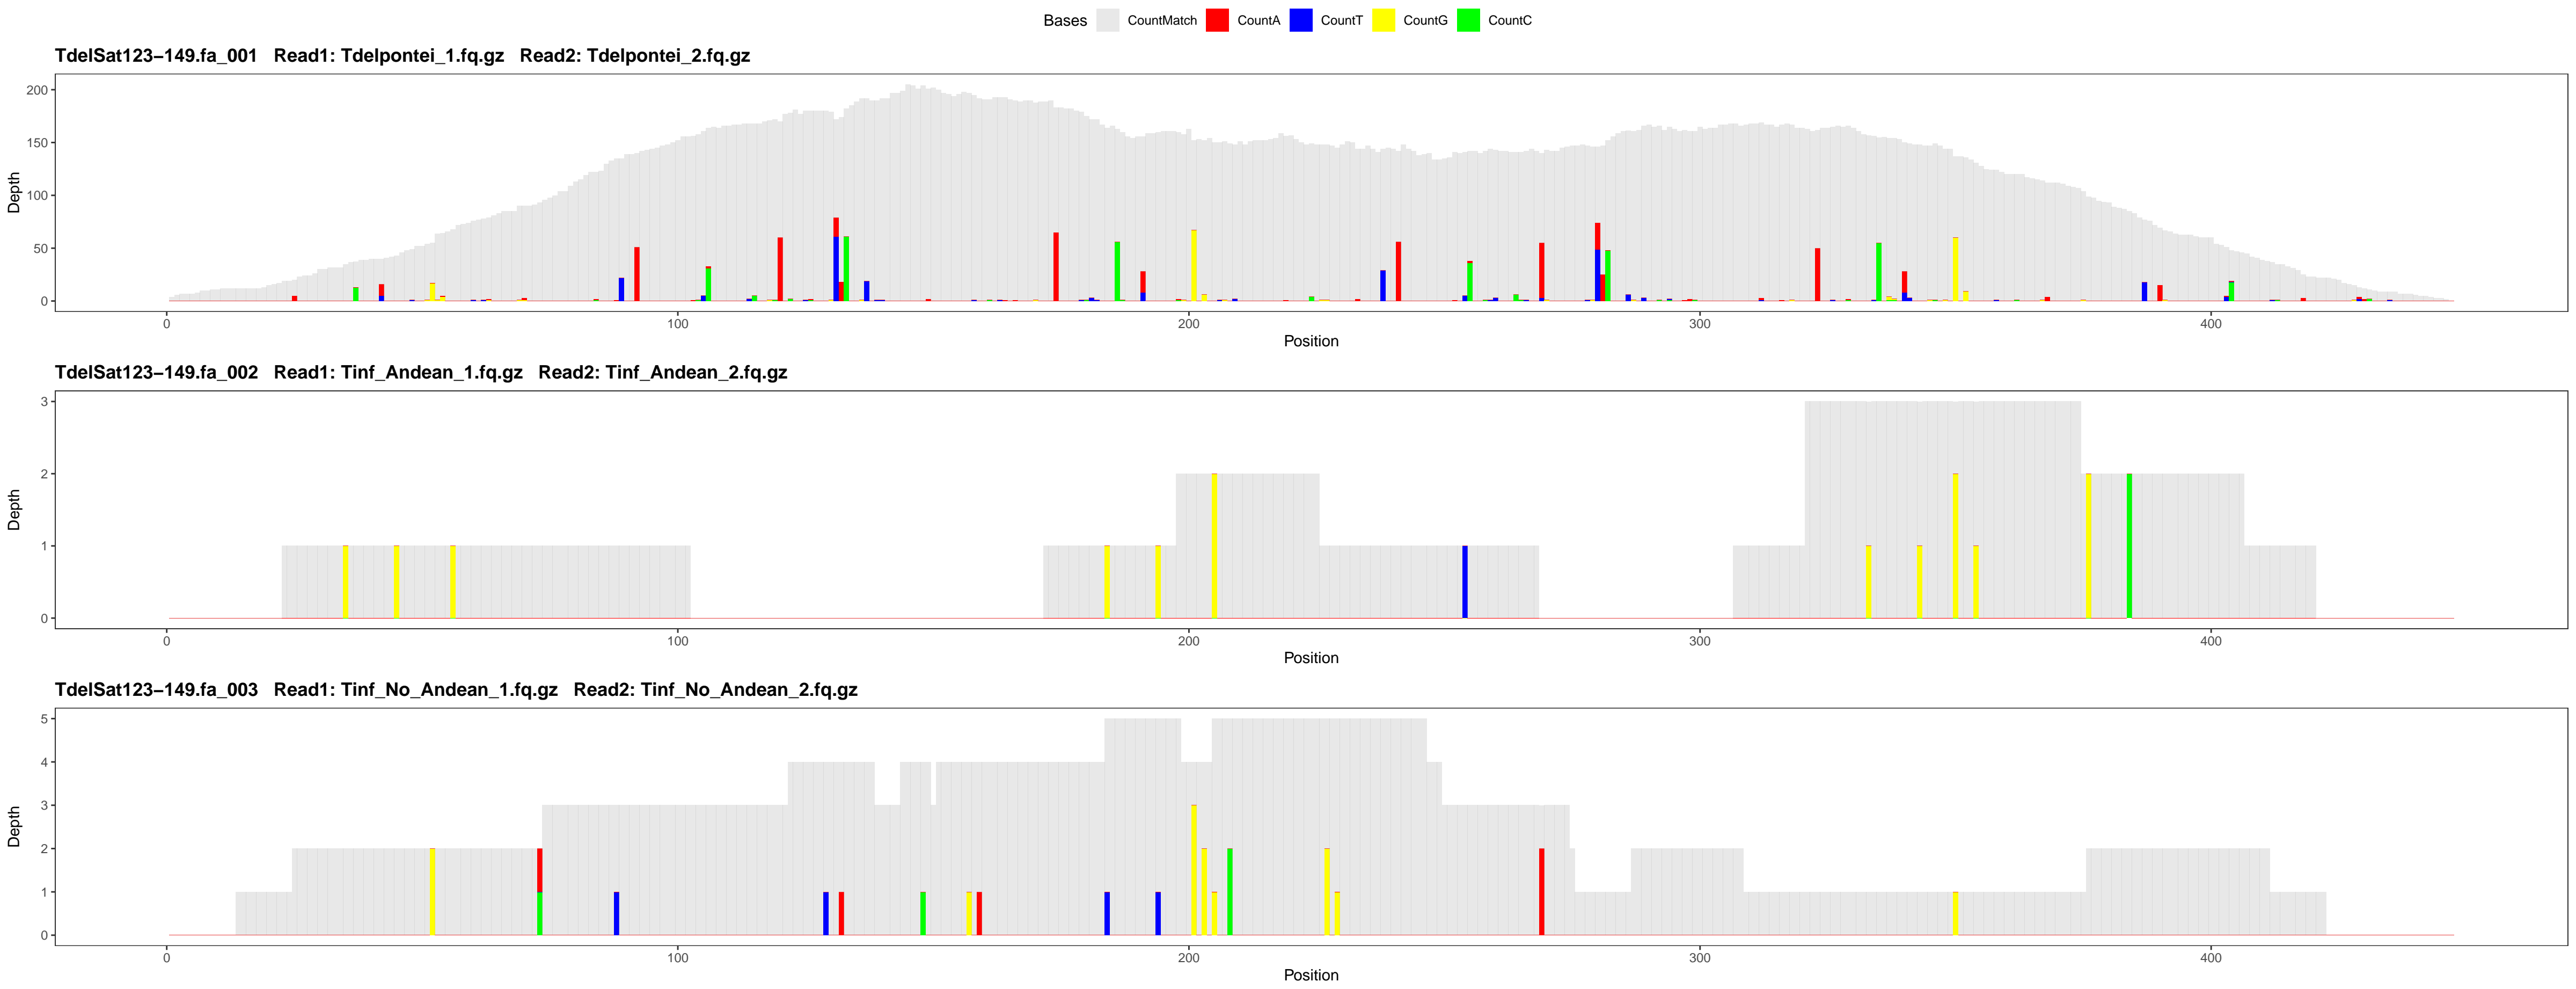

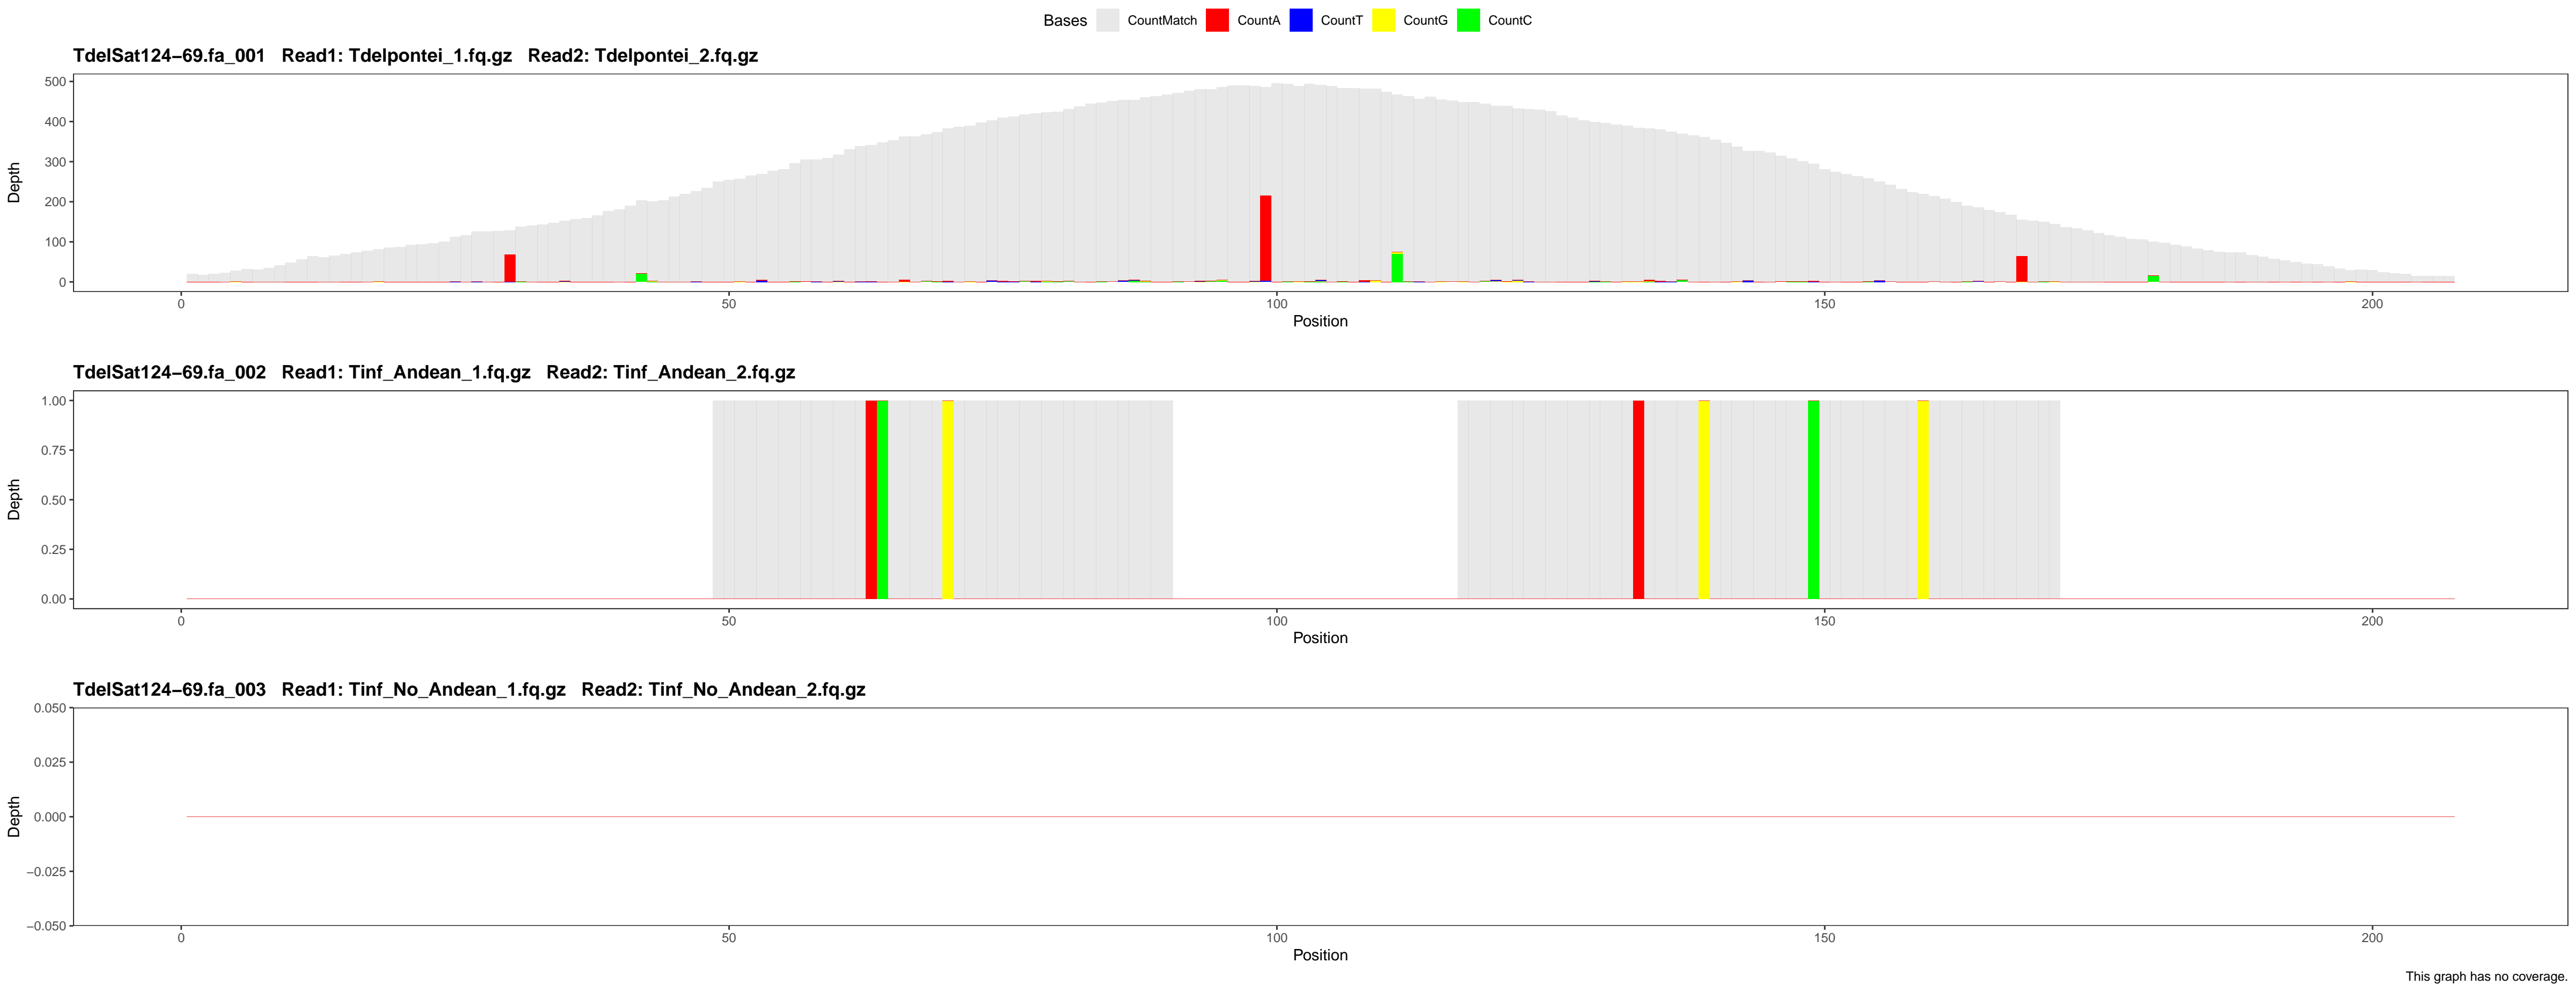

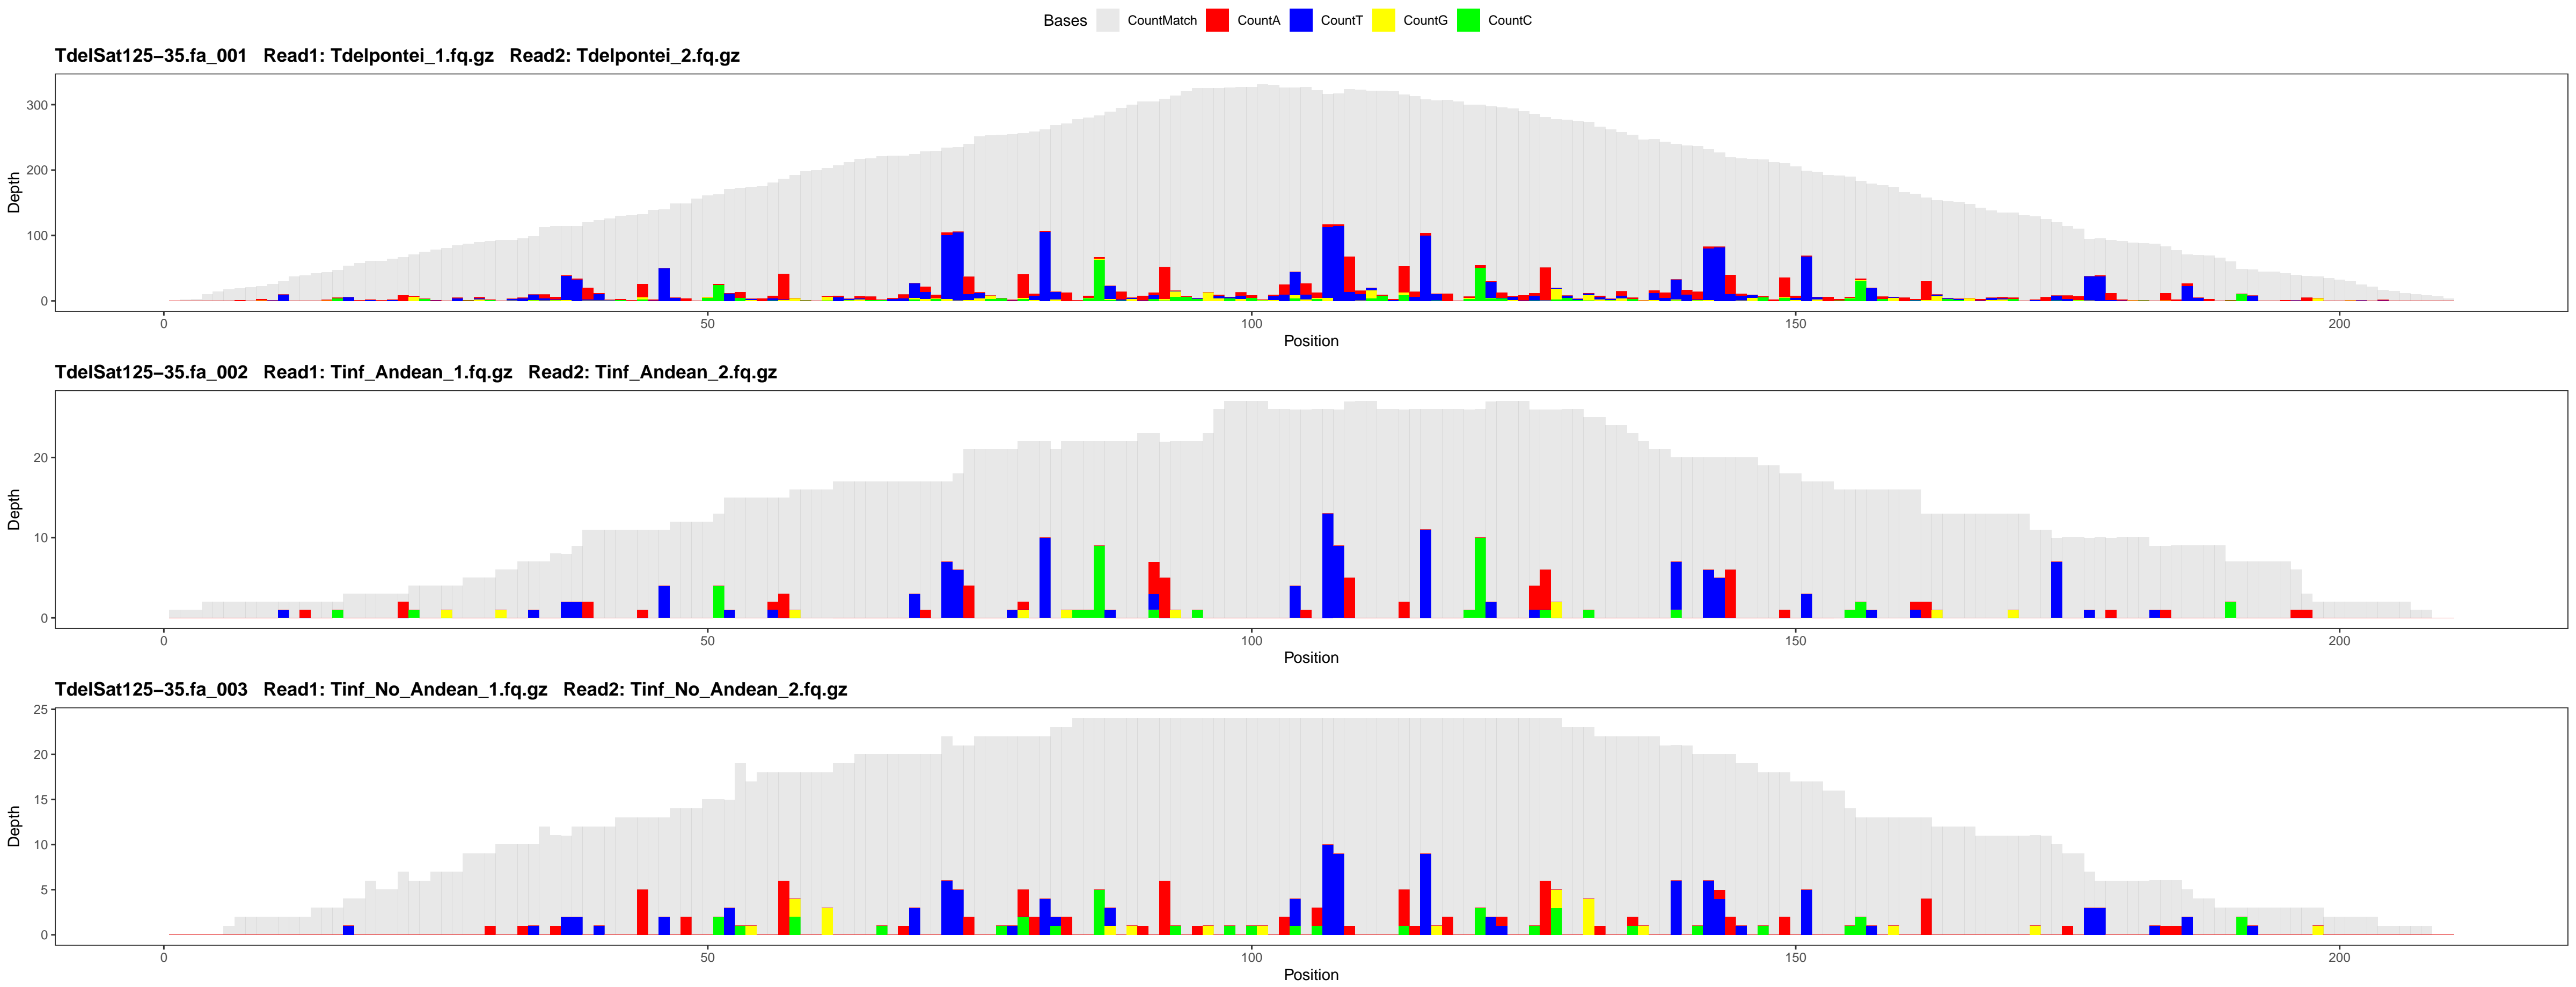

Bases CountMatch CountA CountT CountG CountC

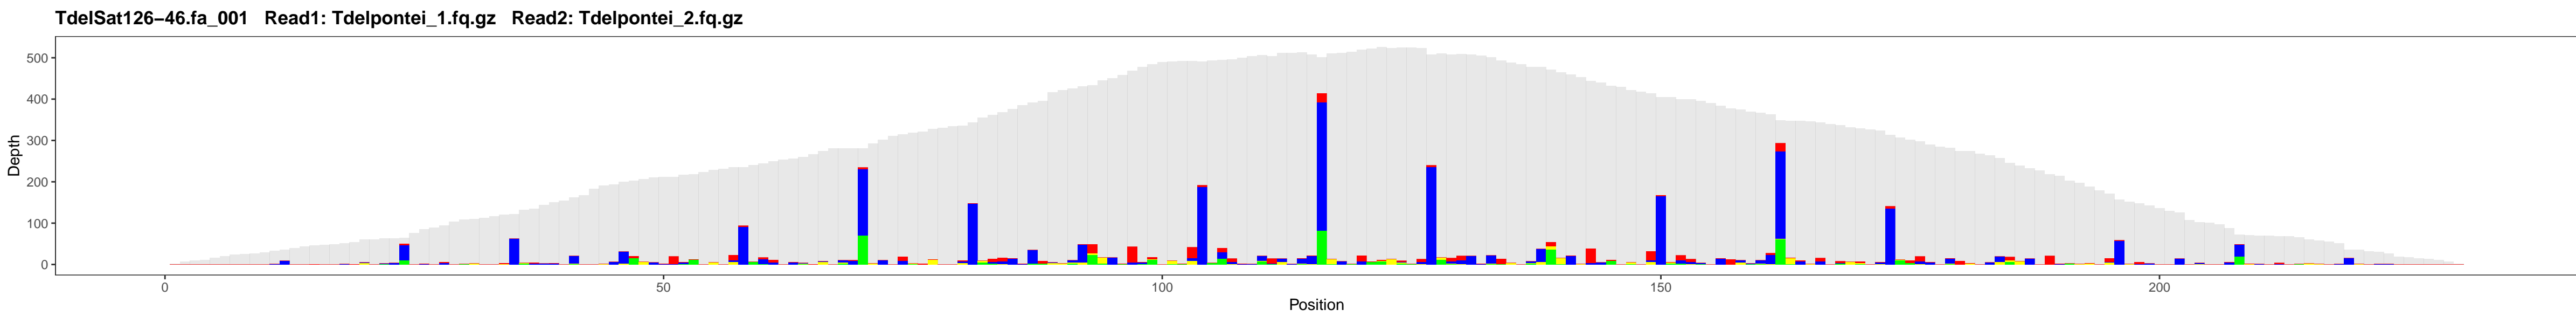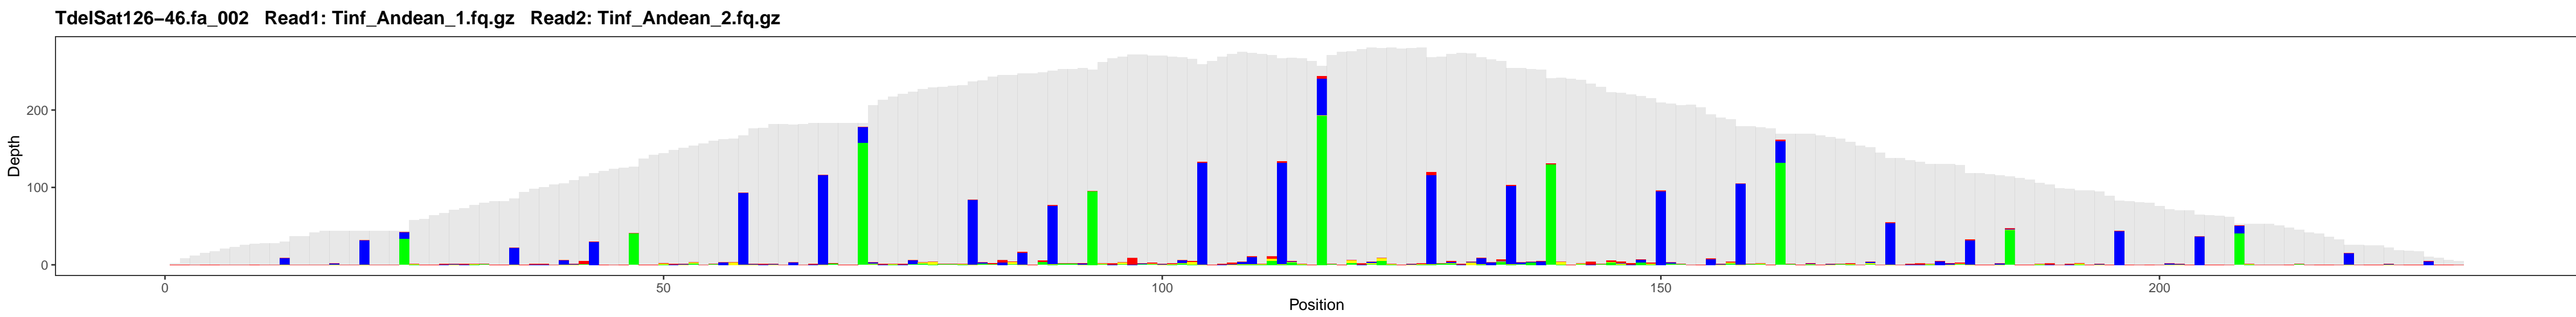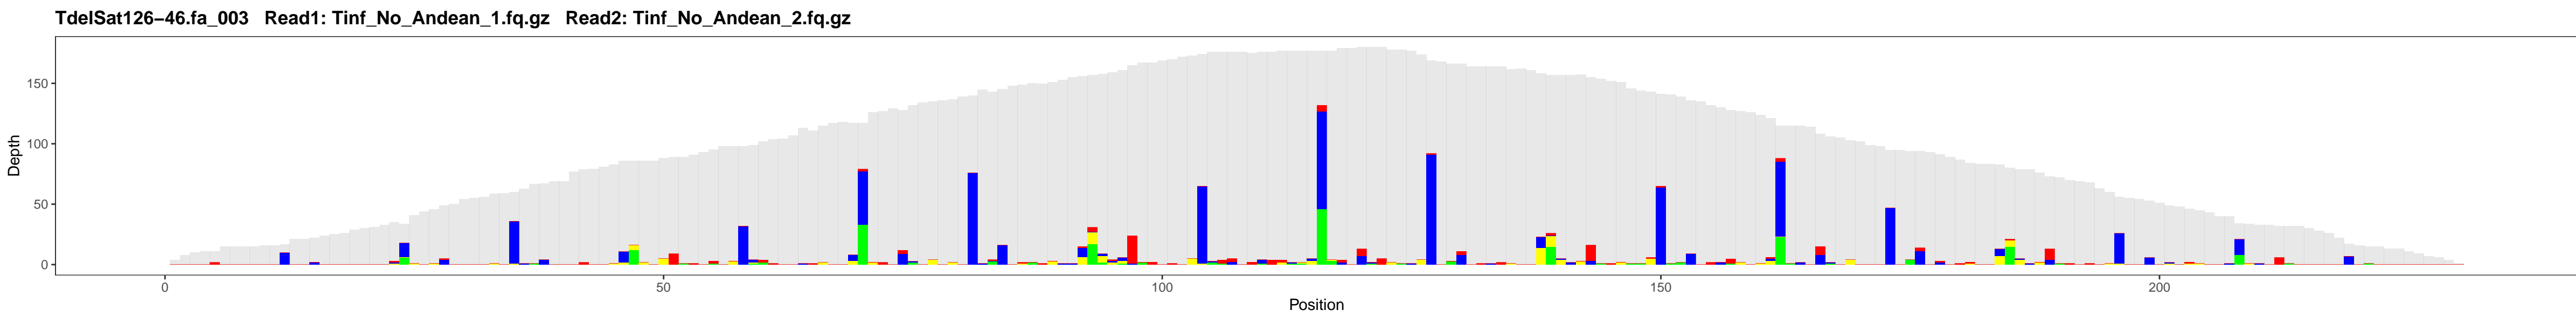



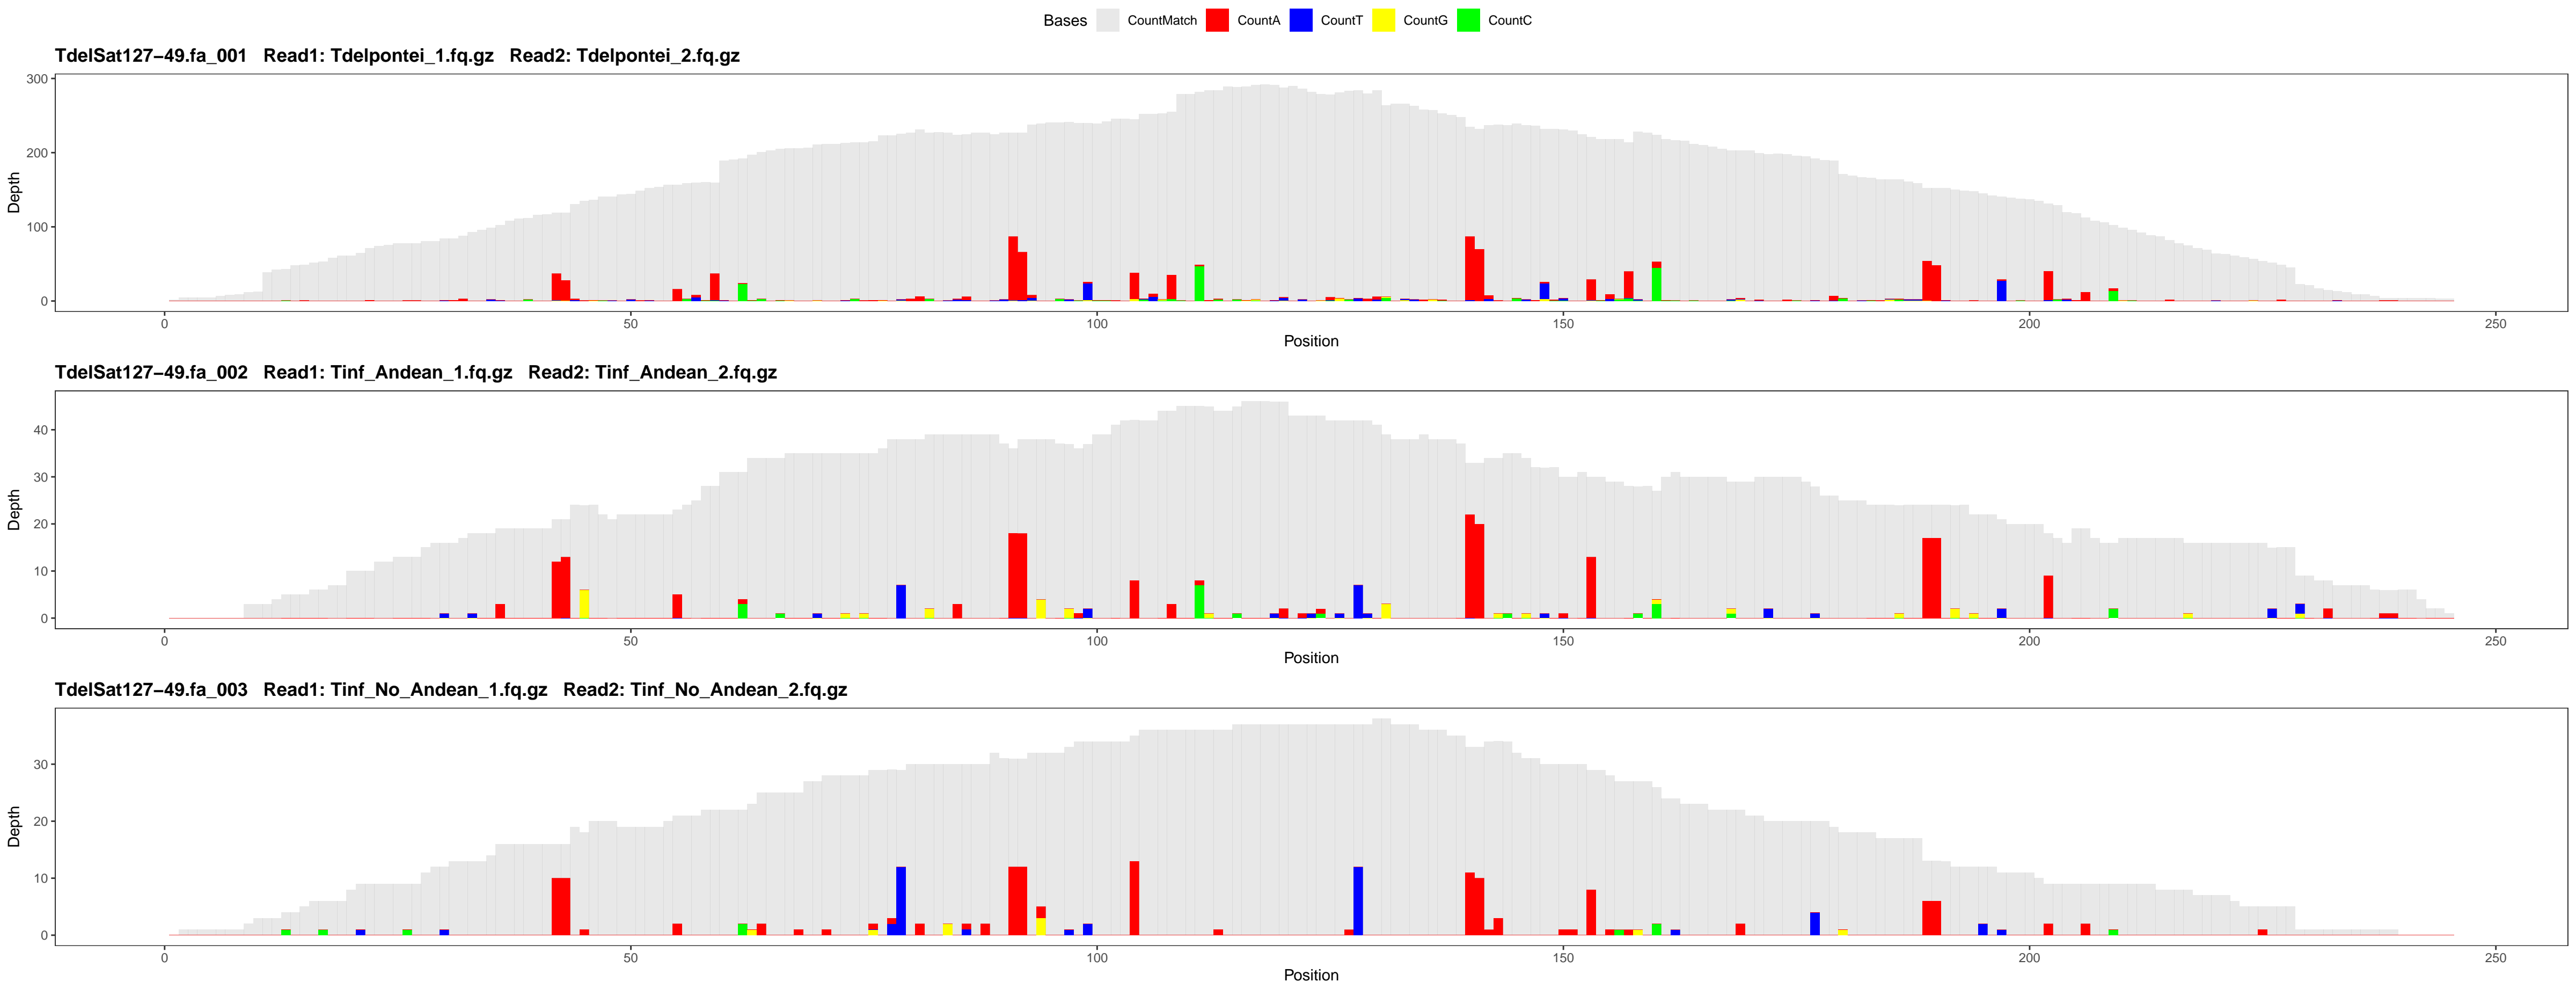

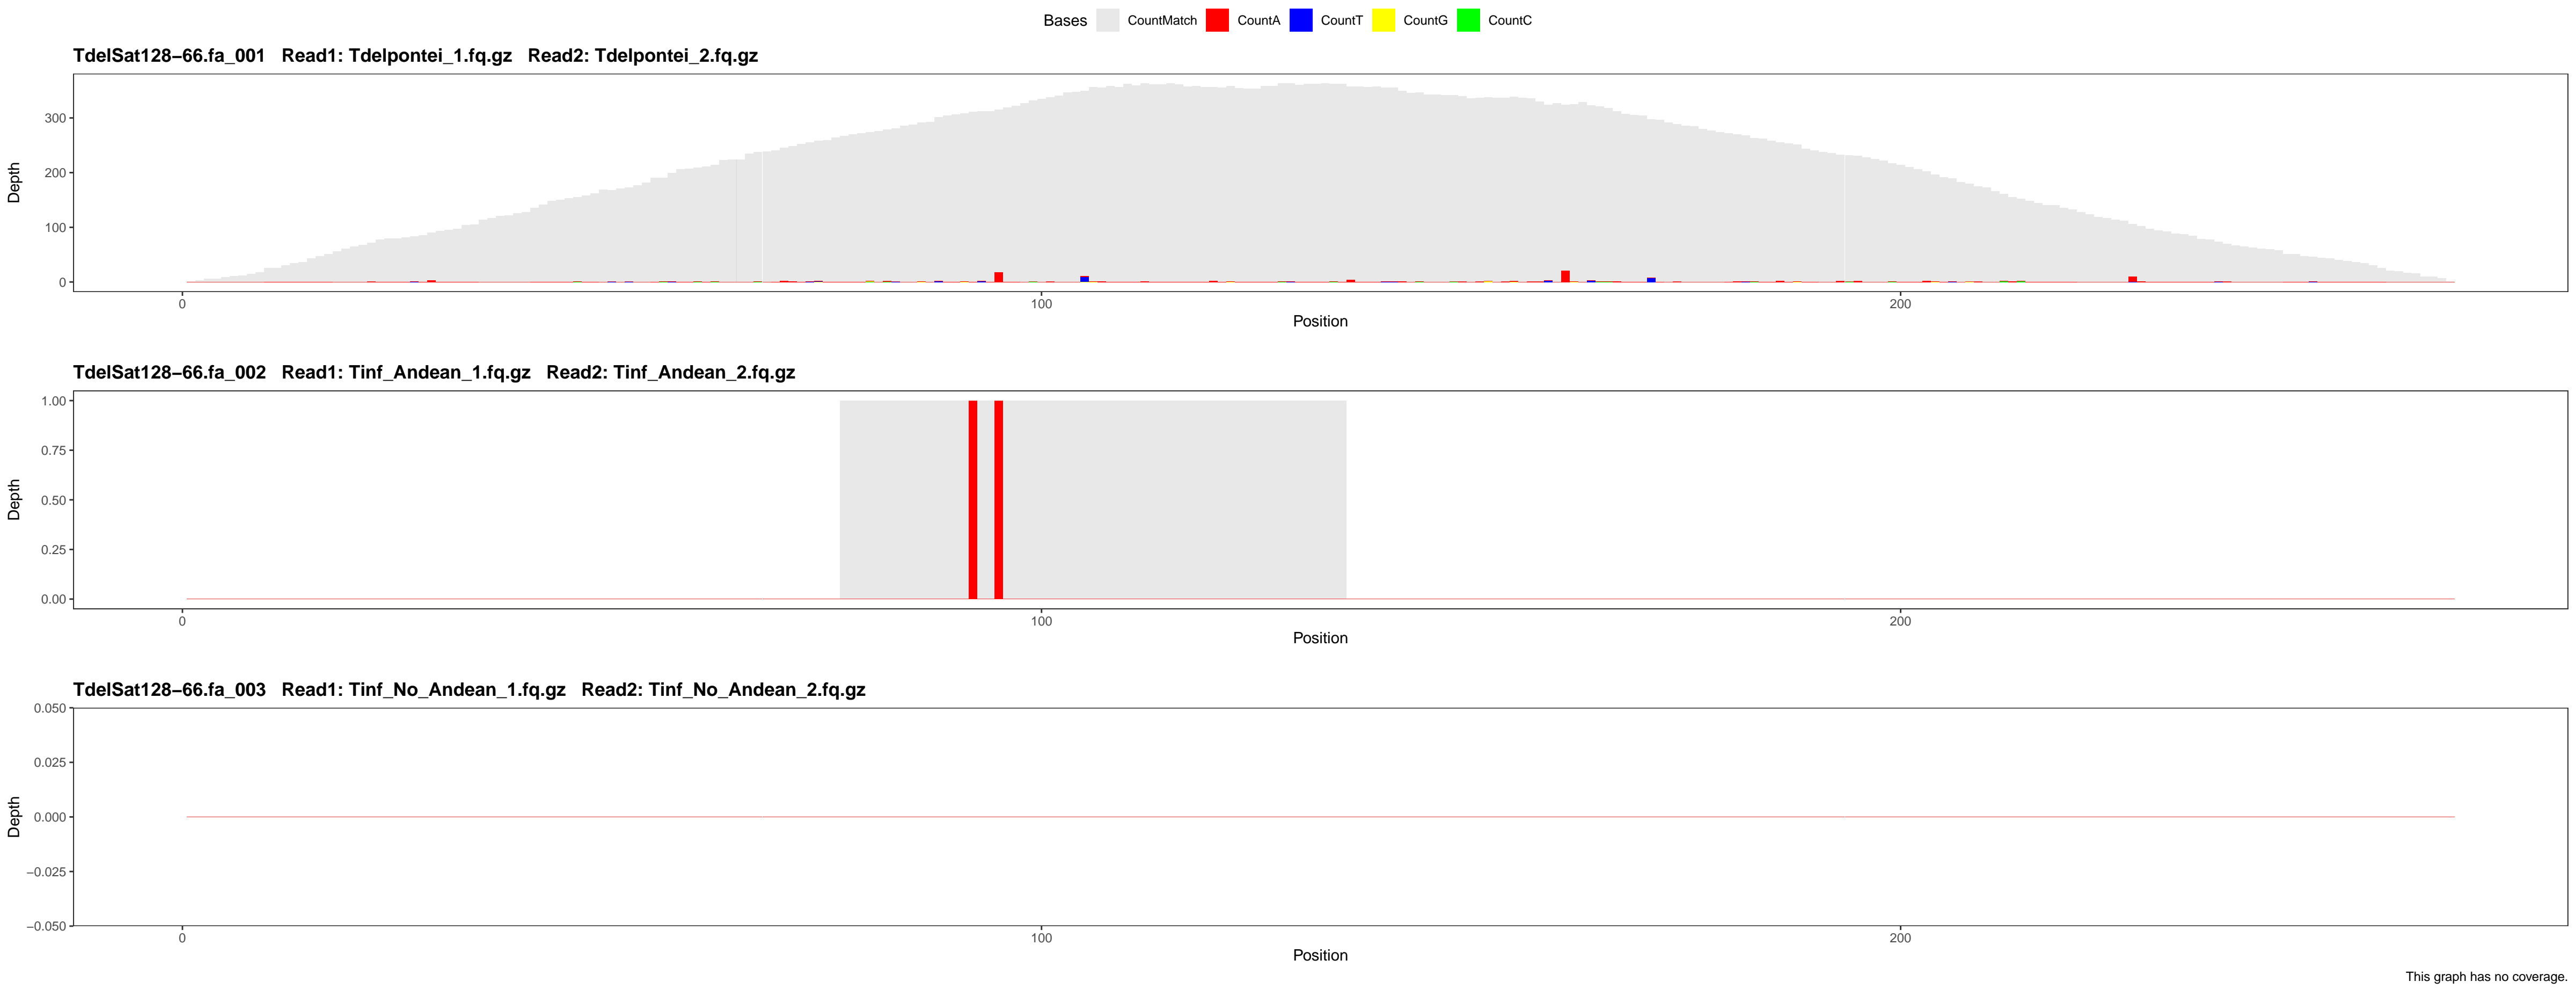

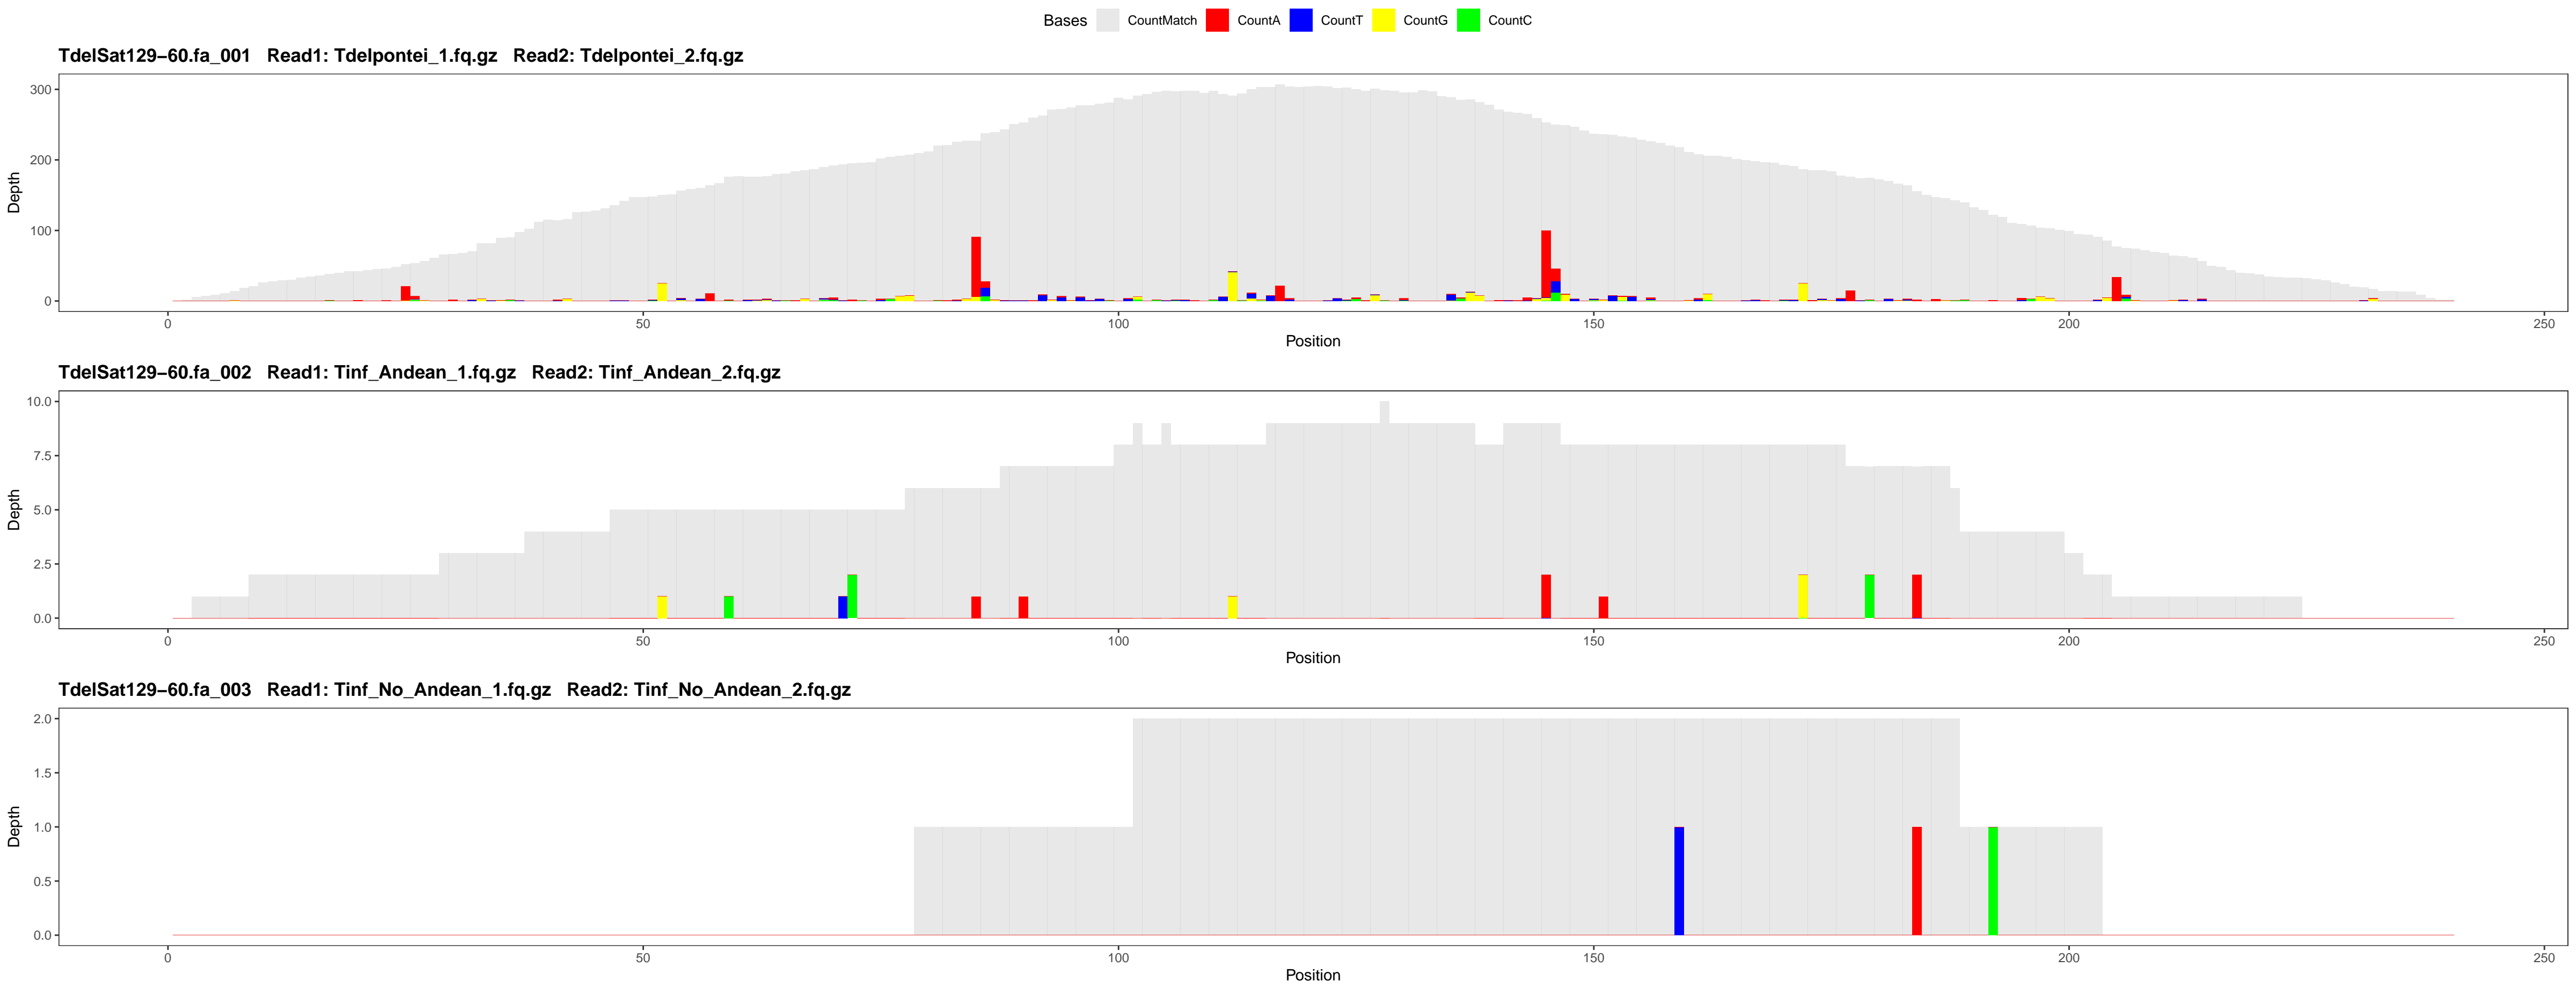

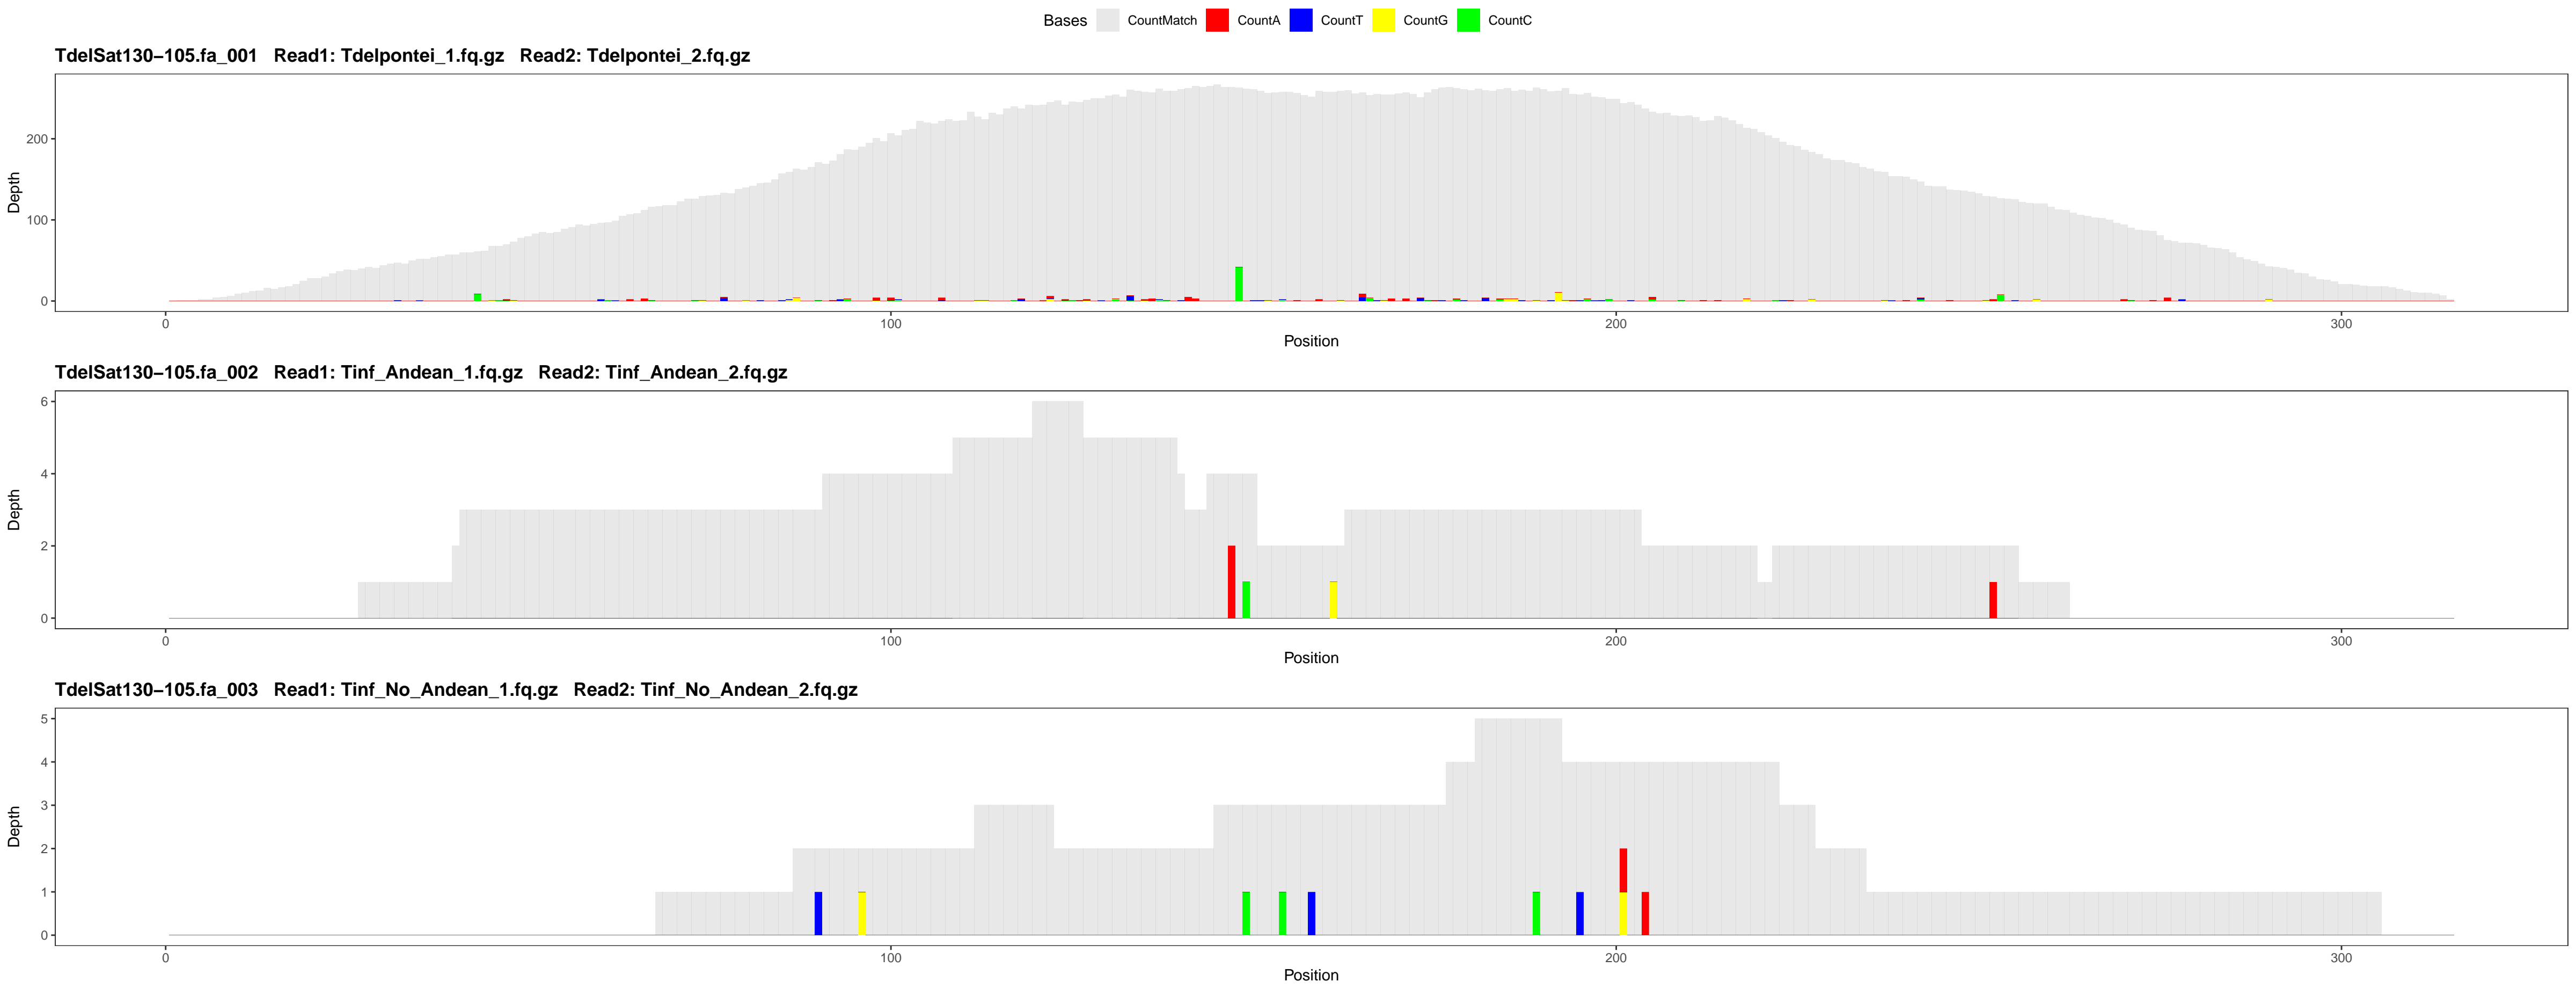

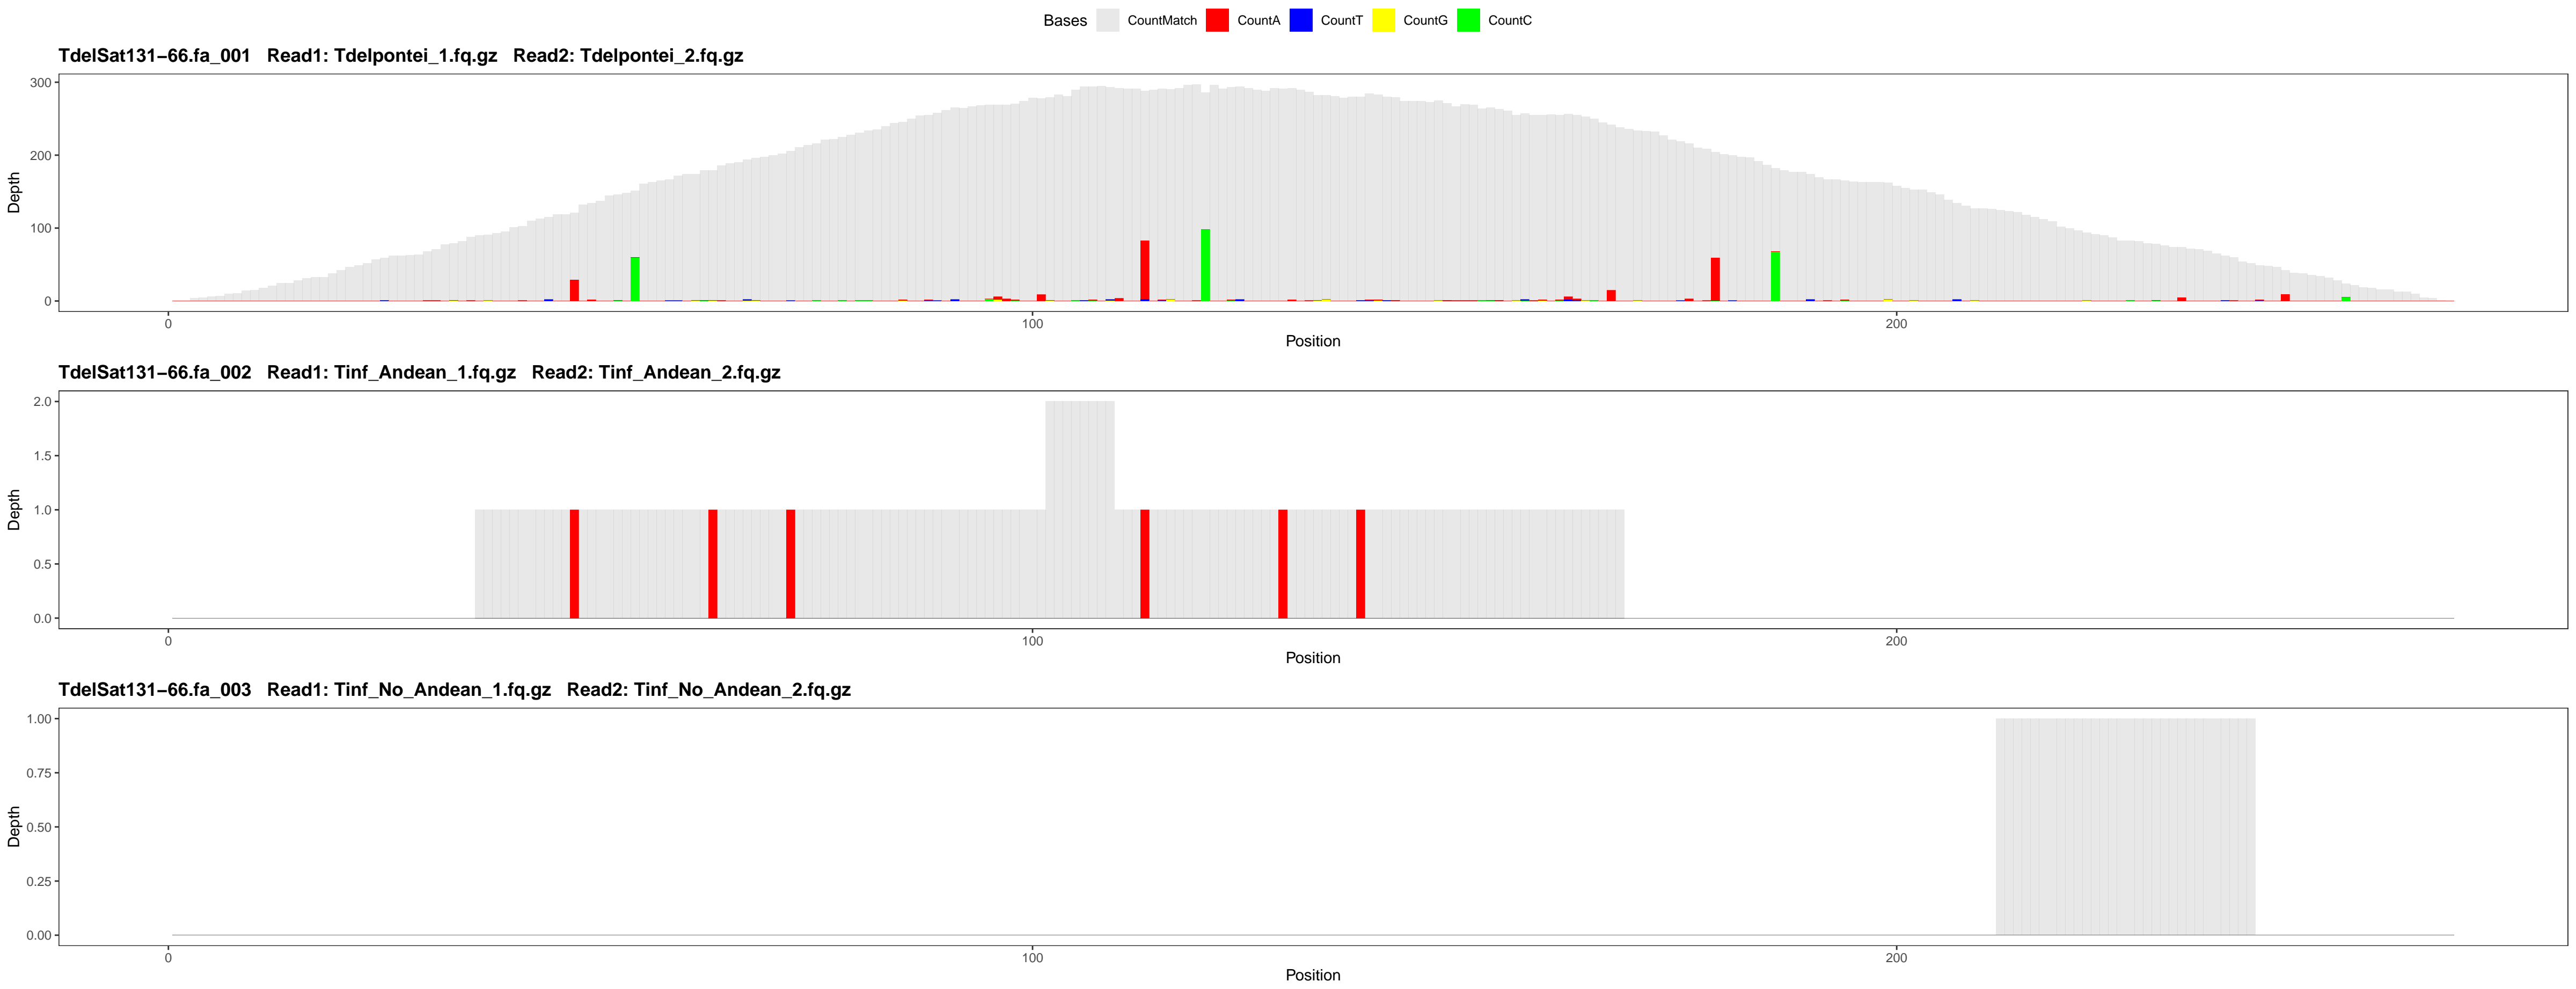

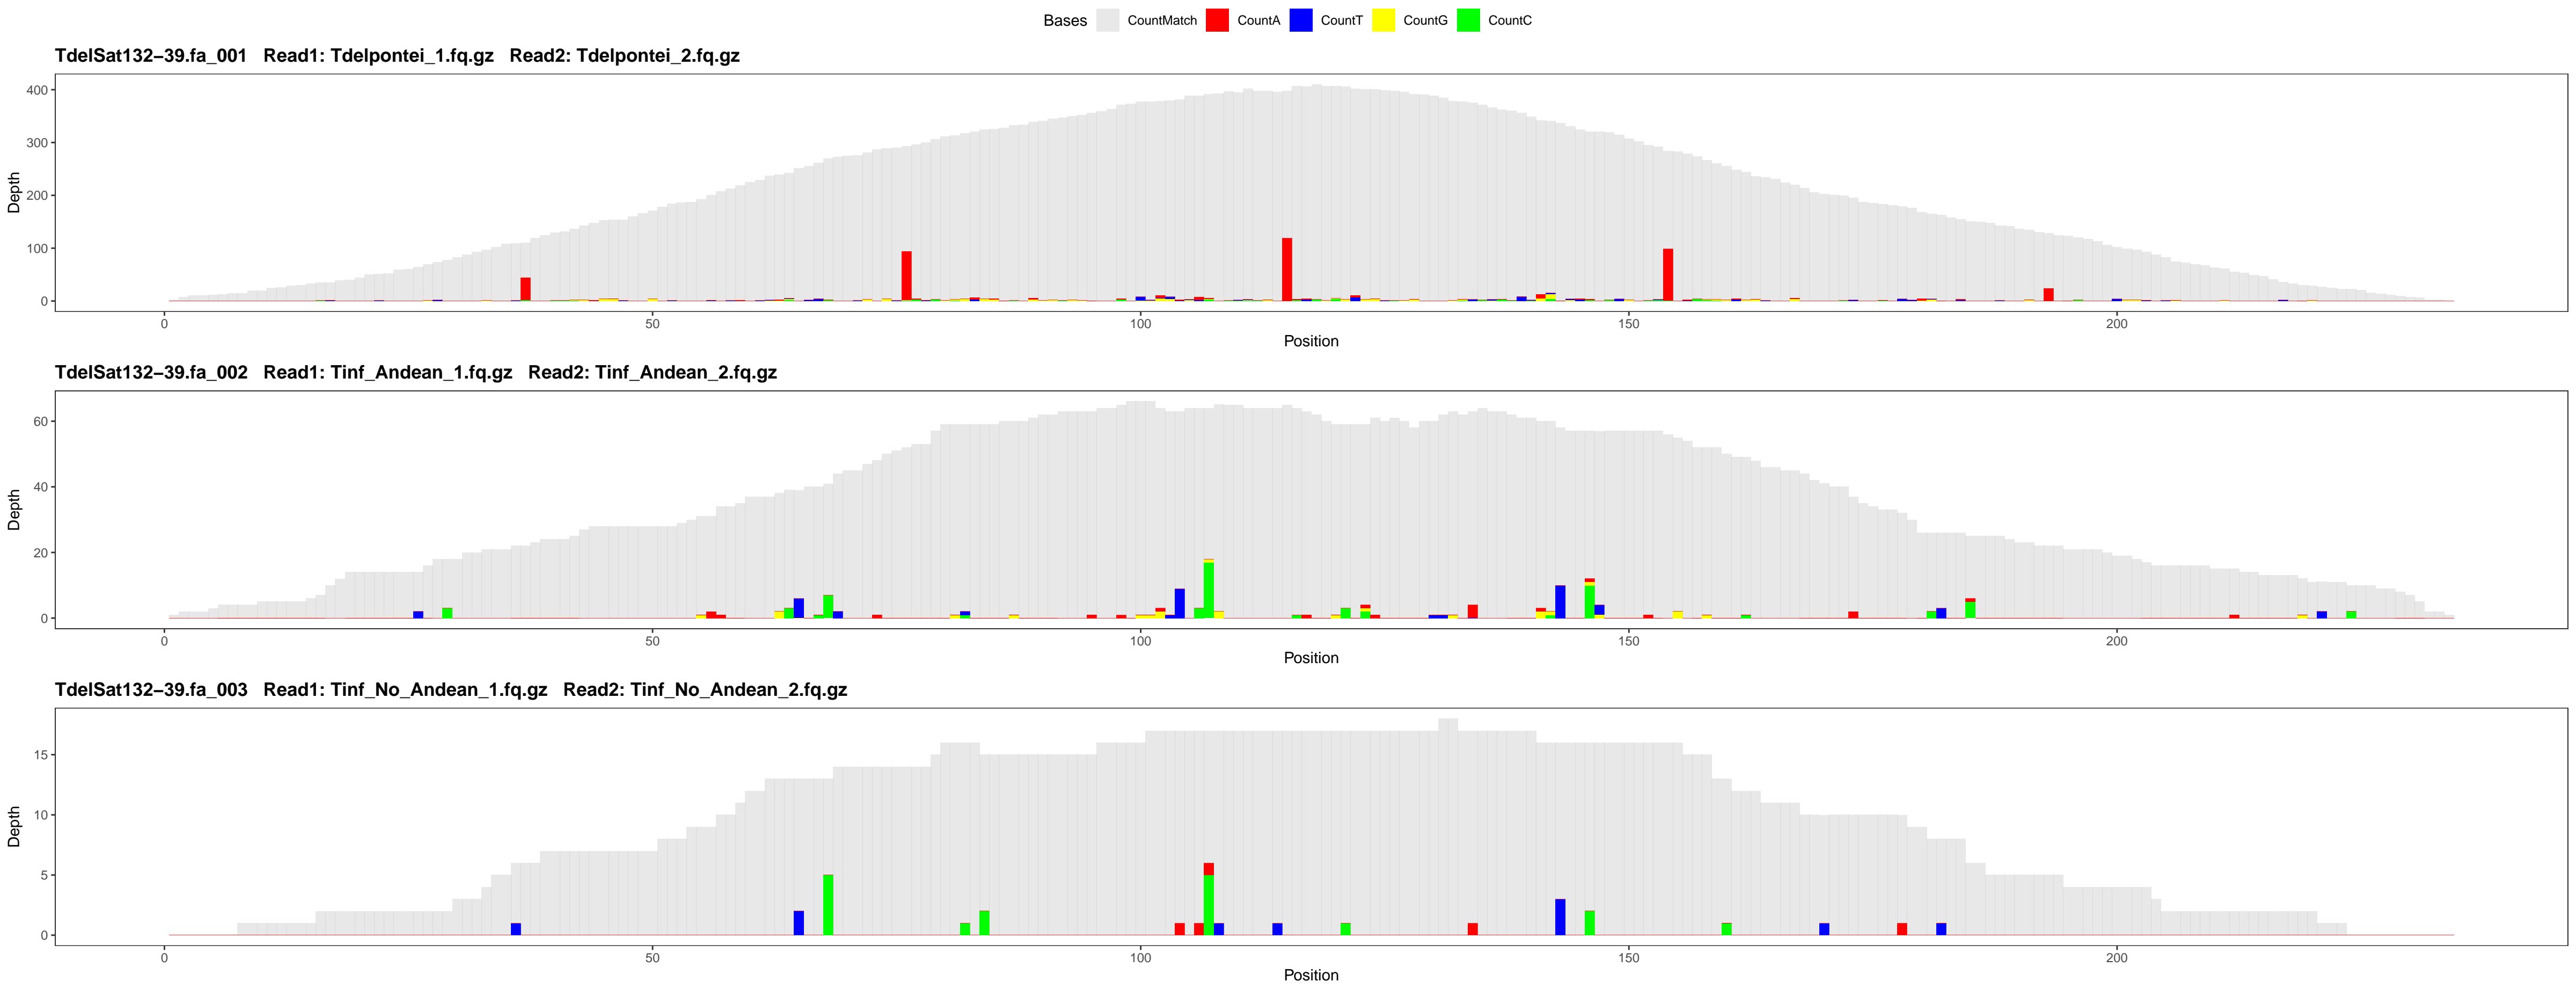

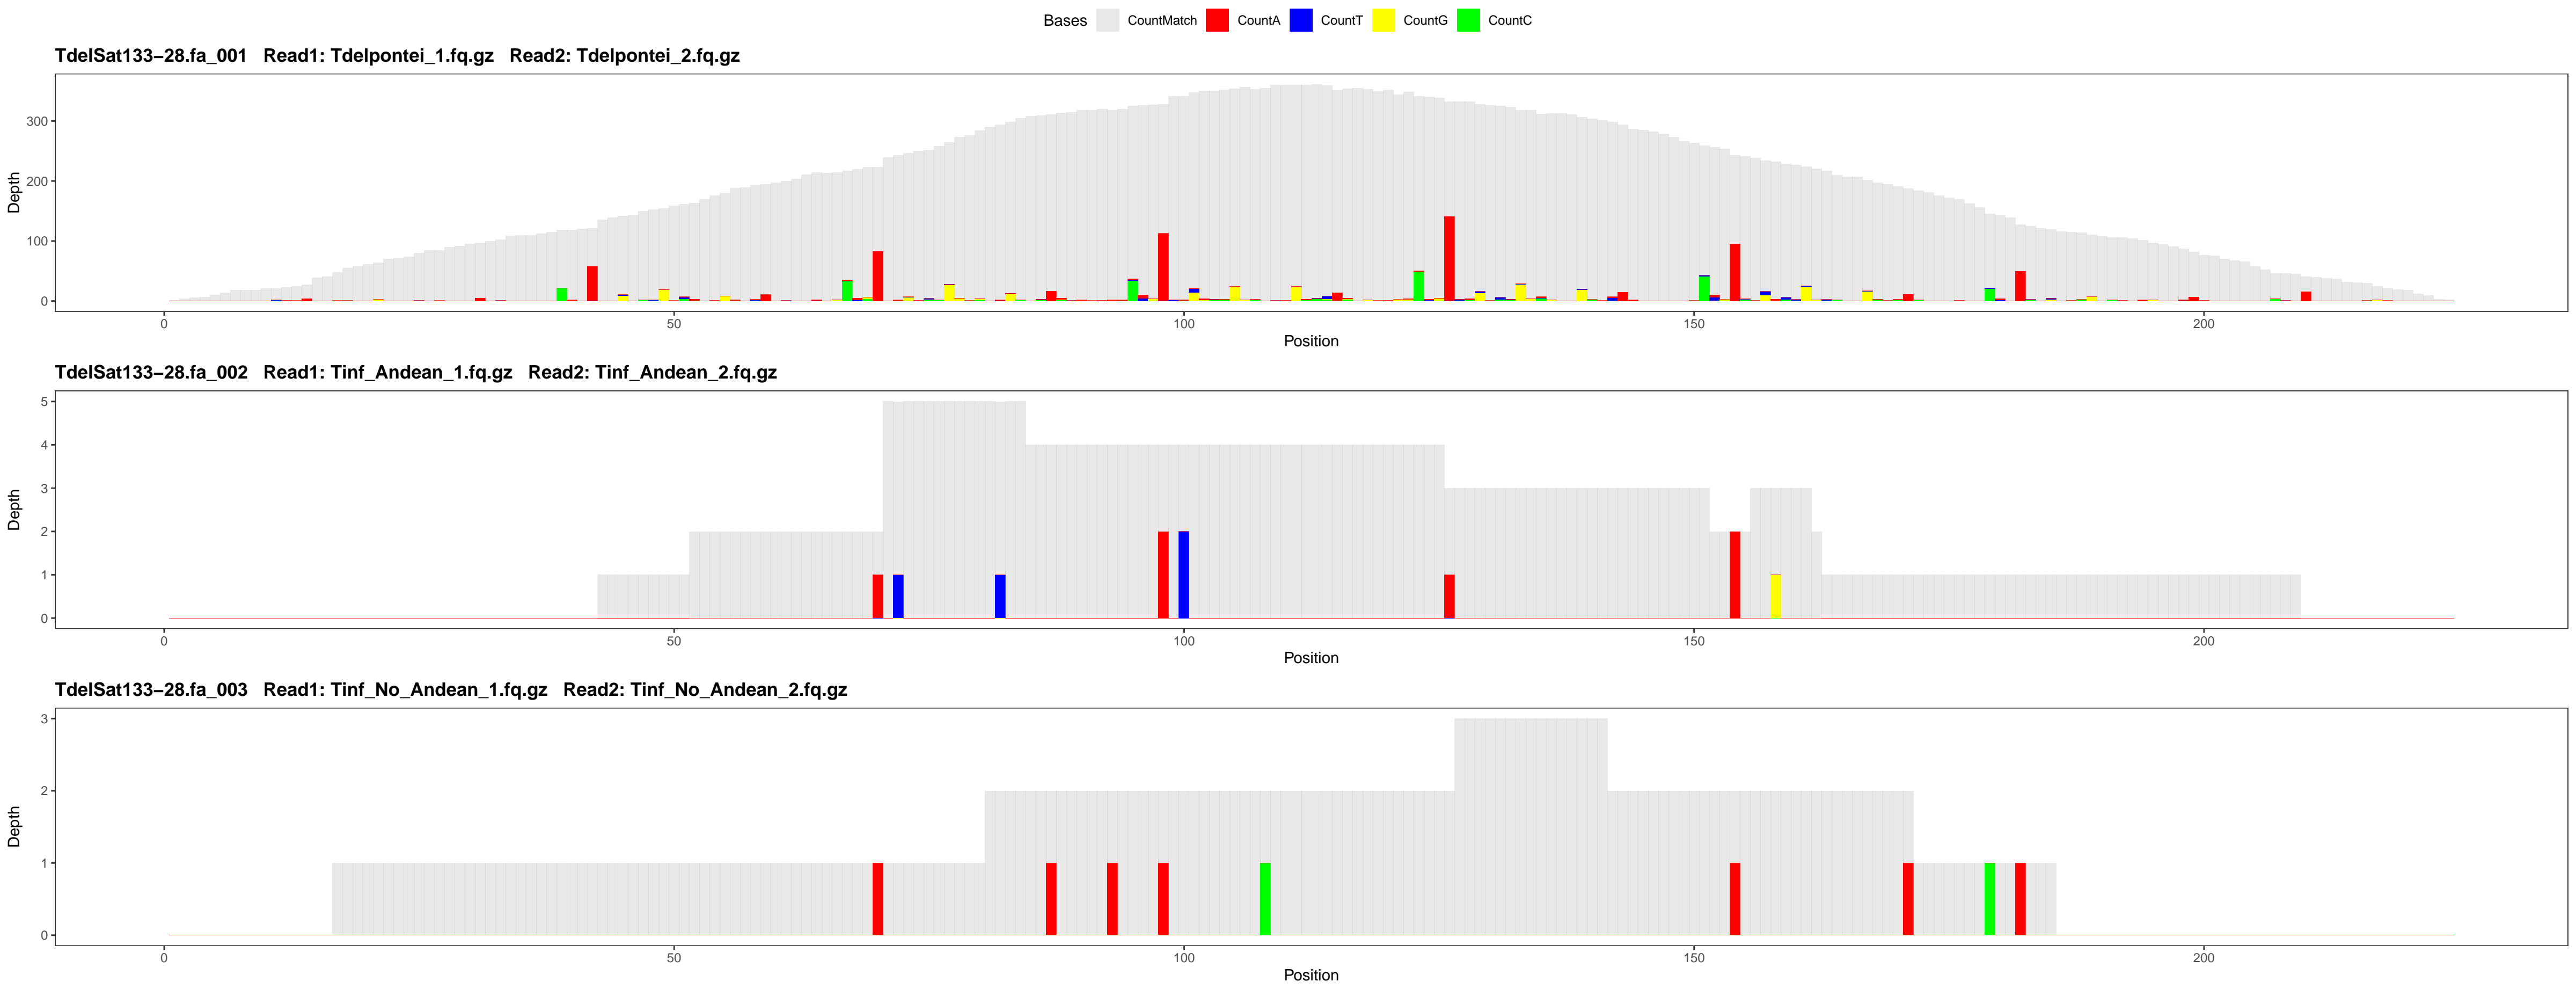

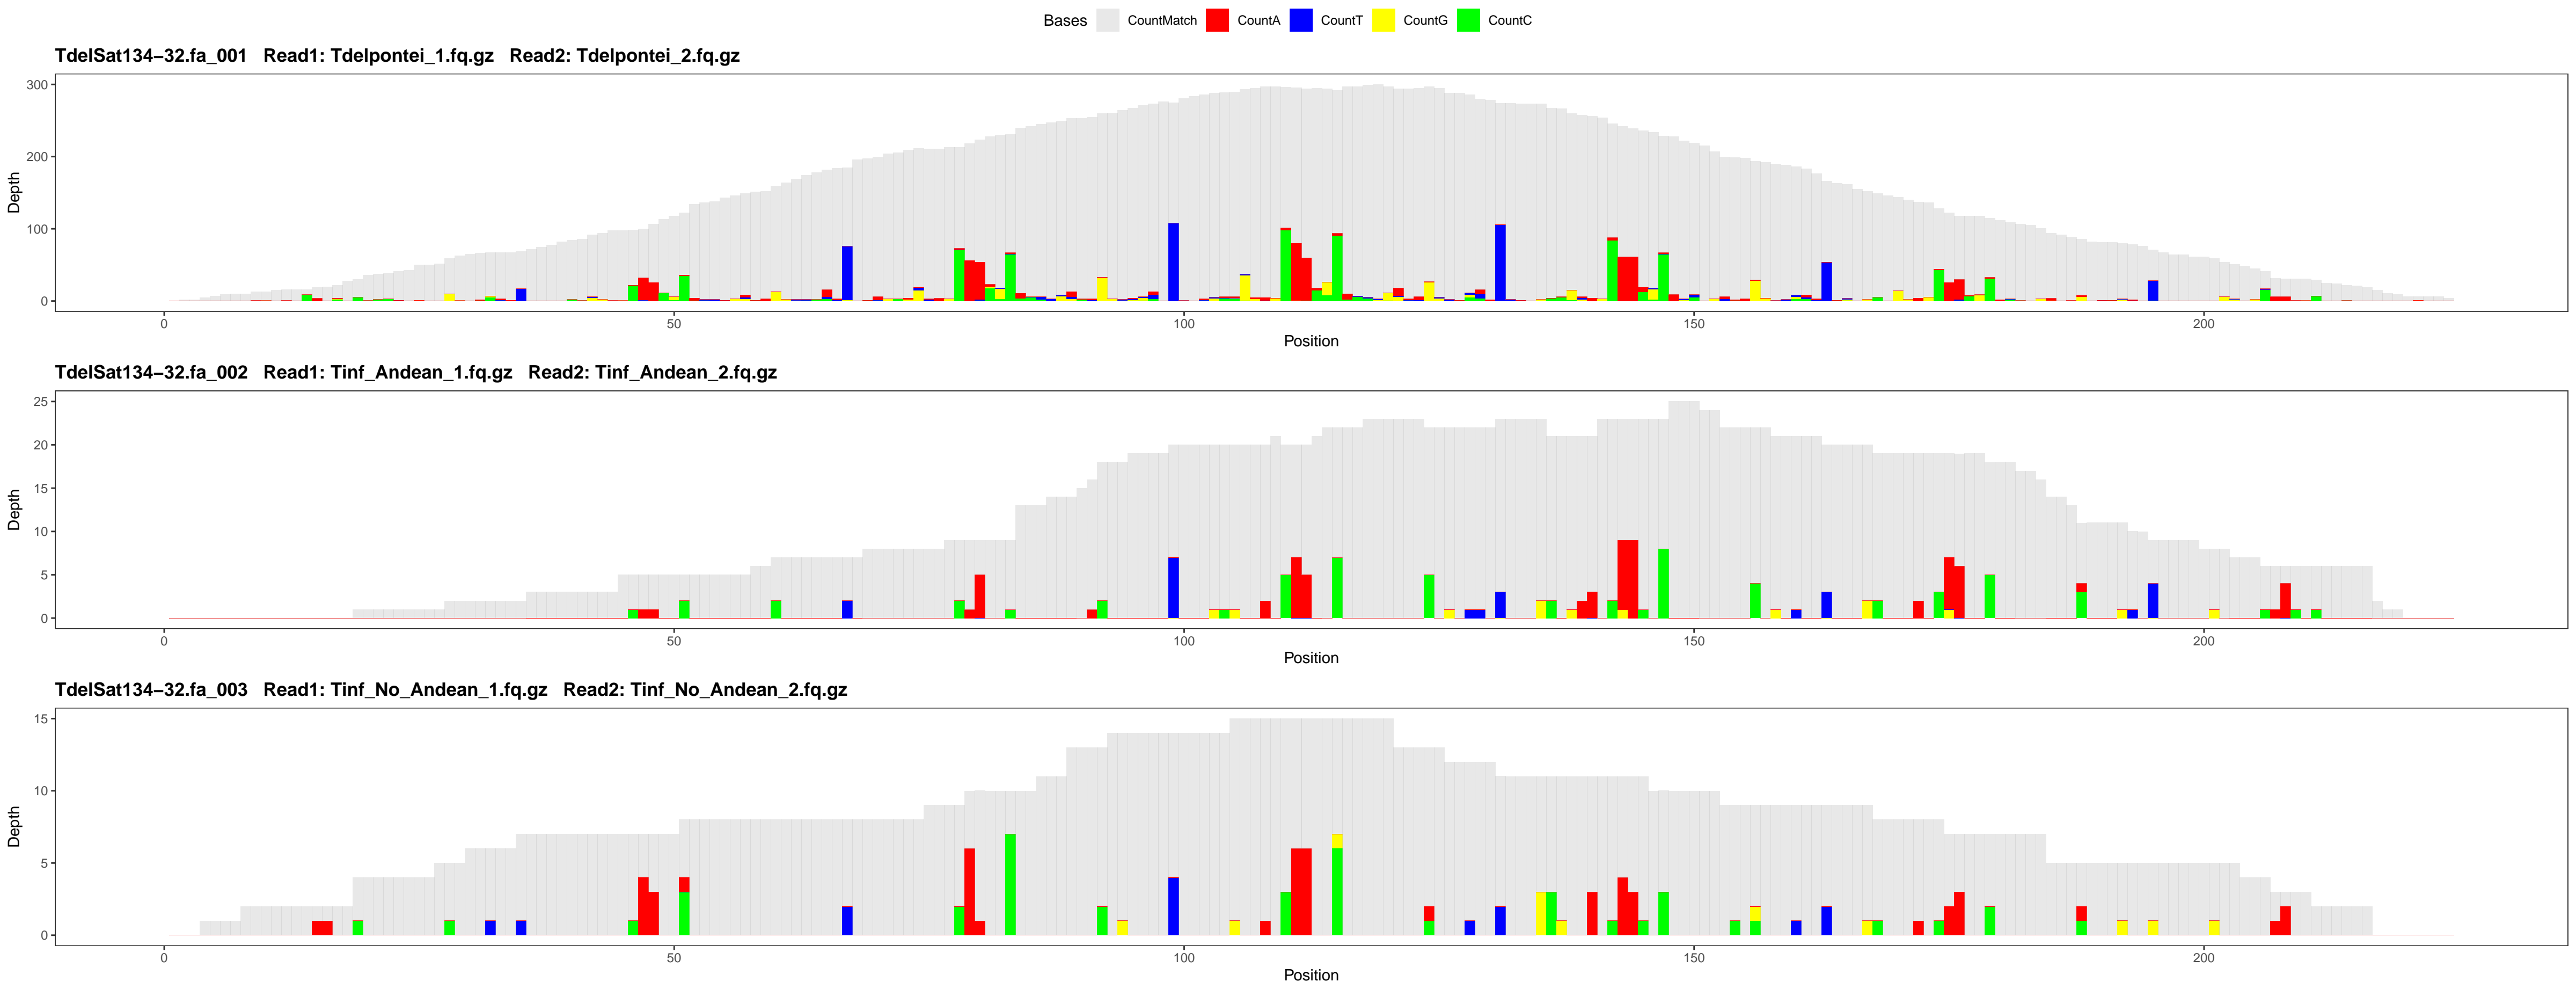



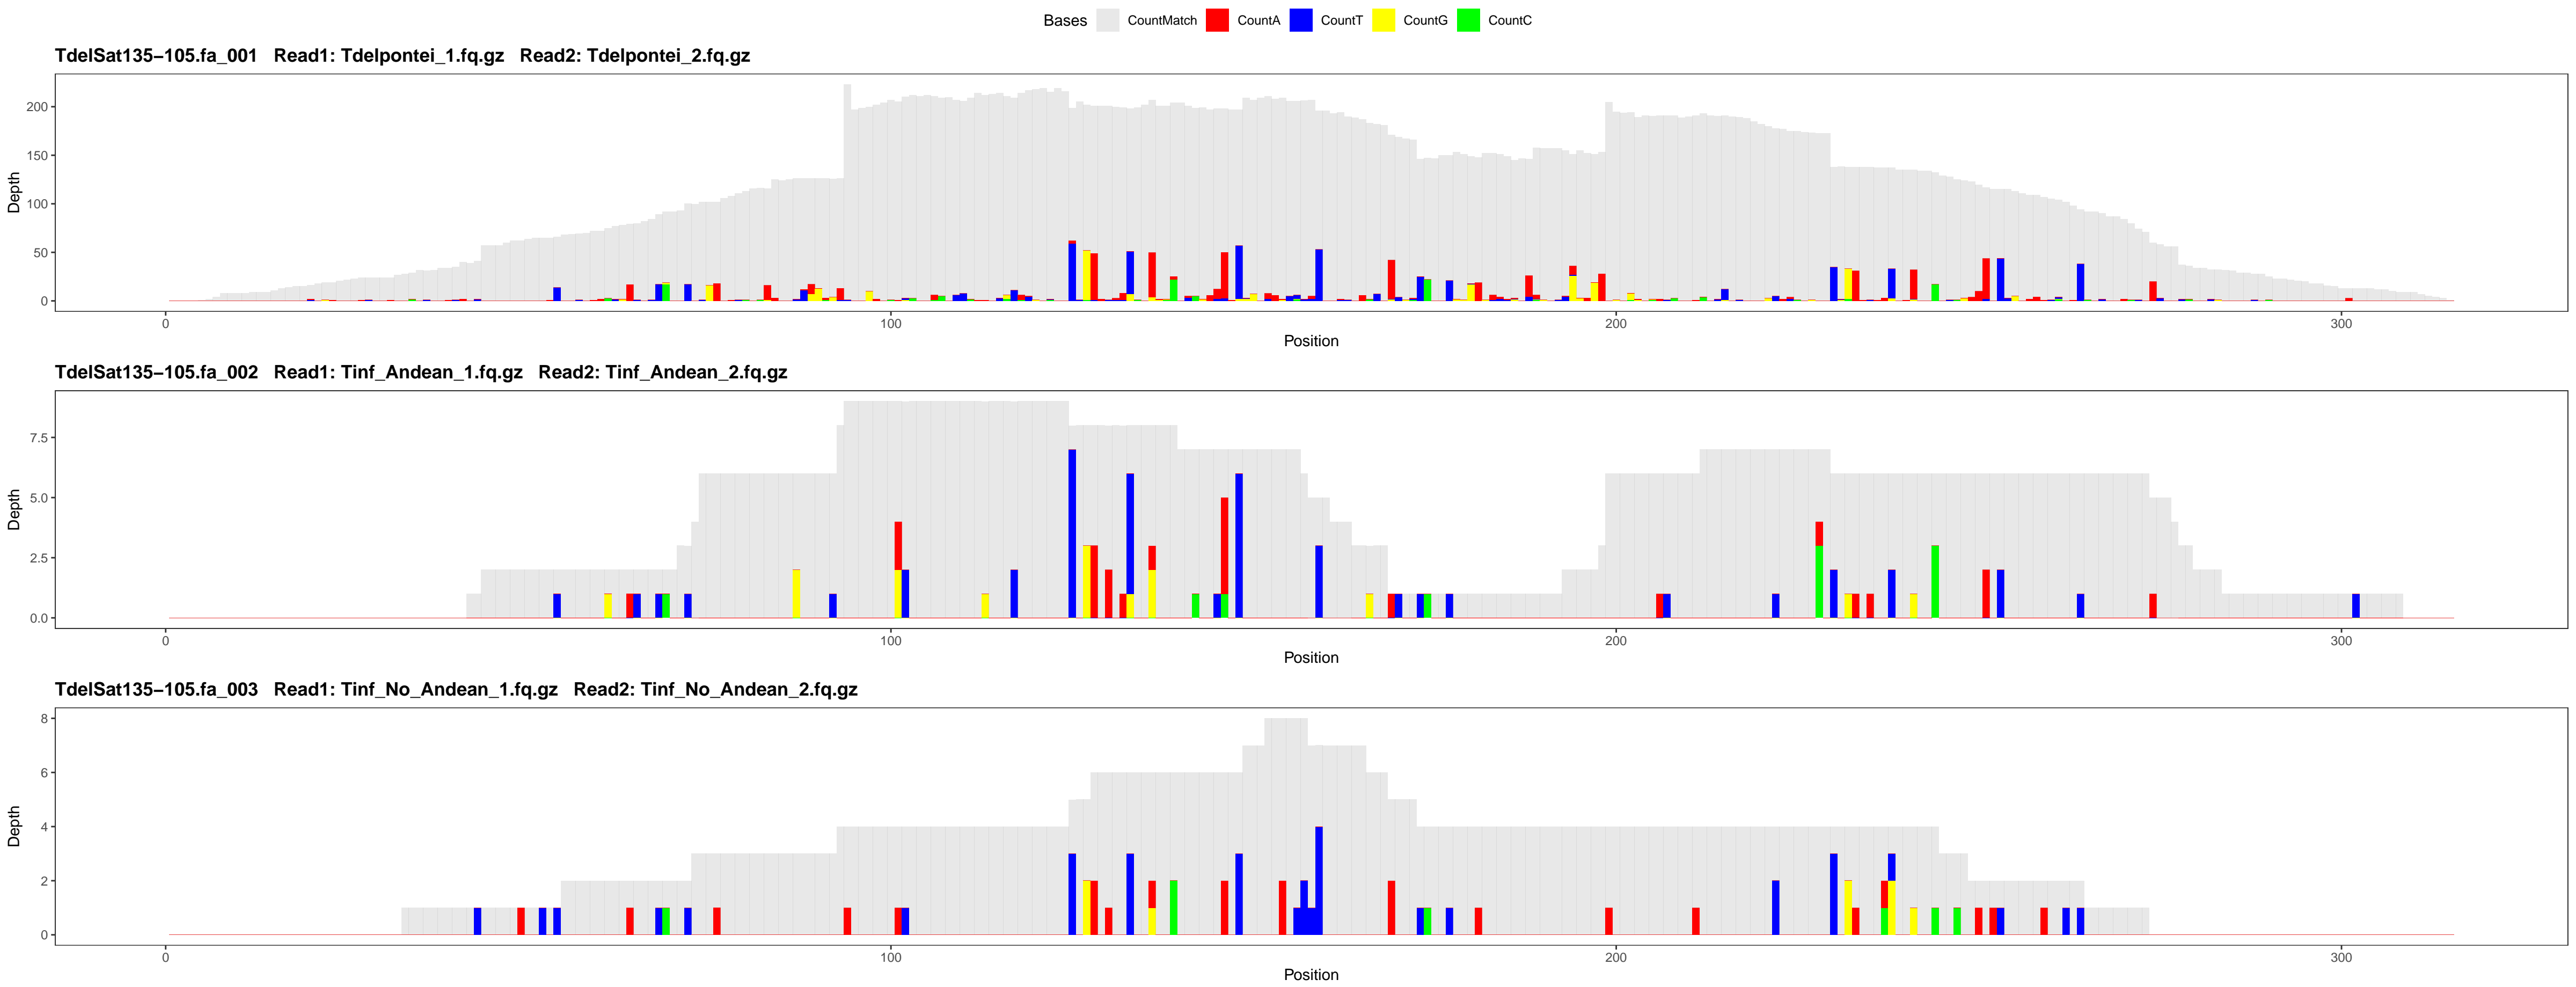

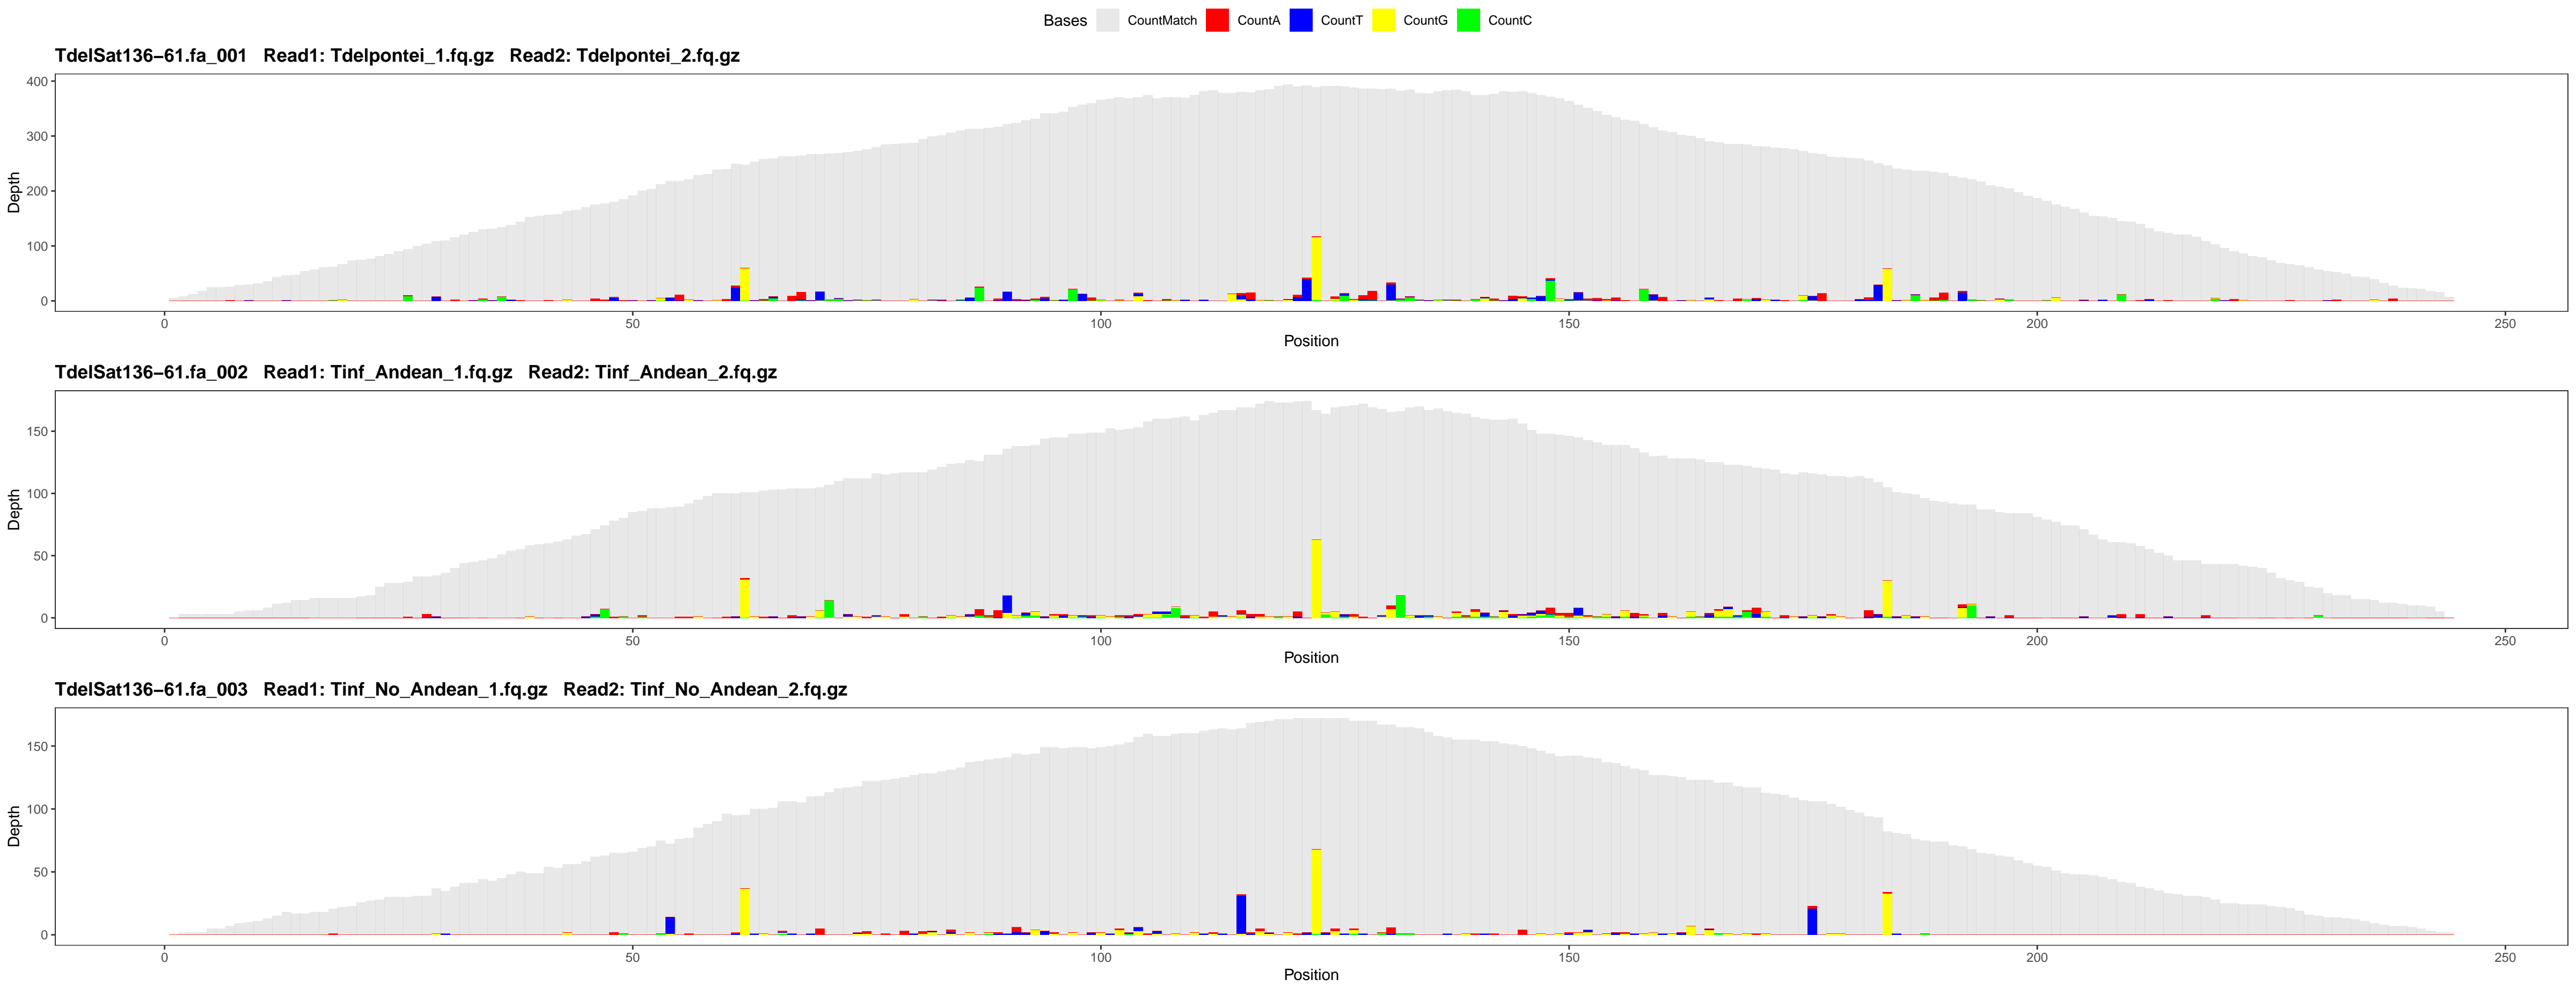

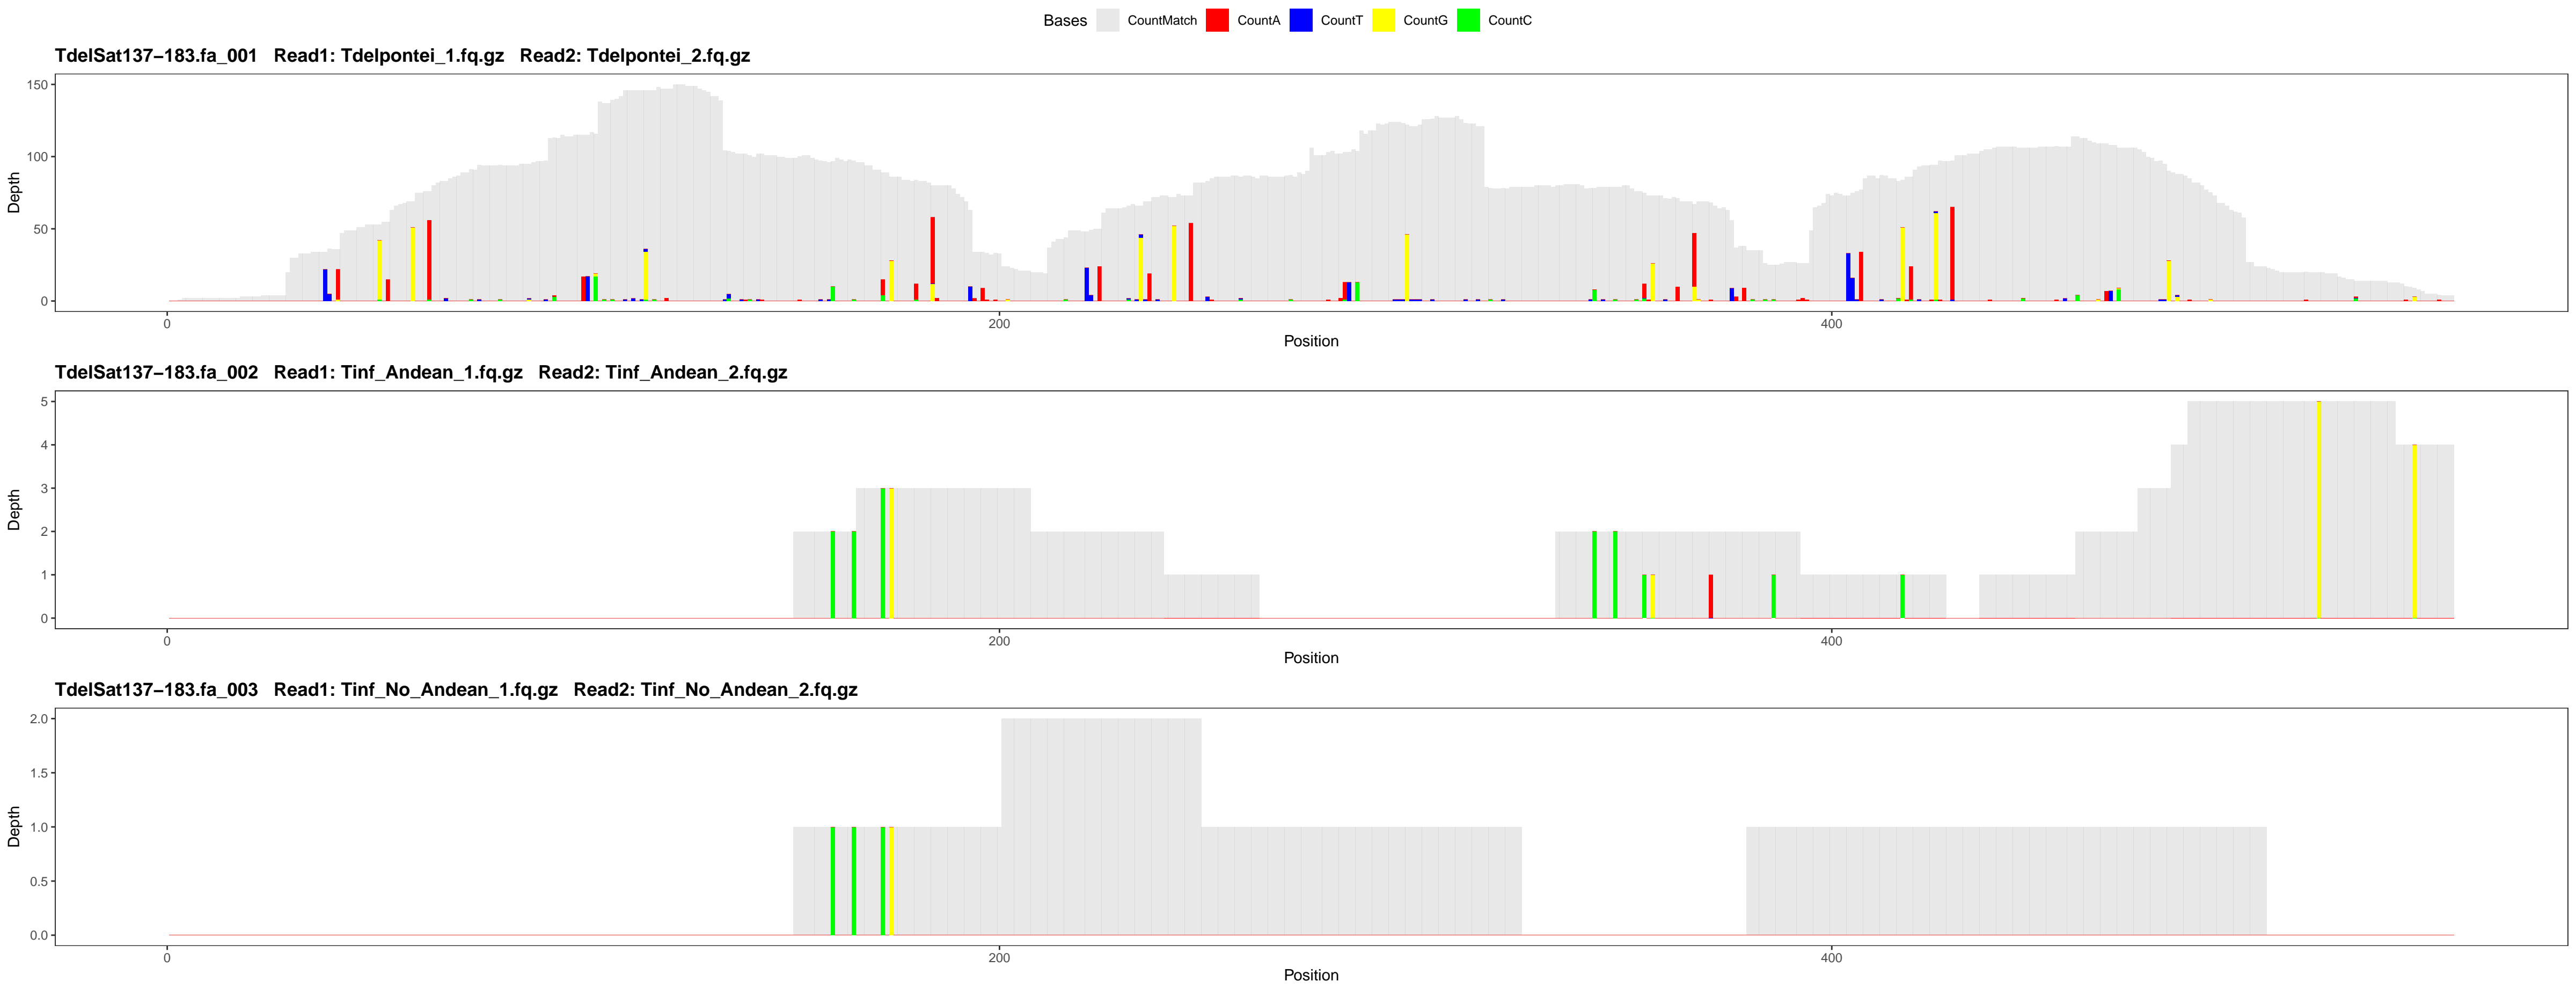

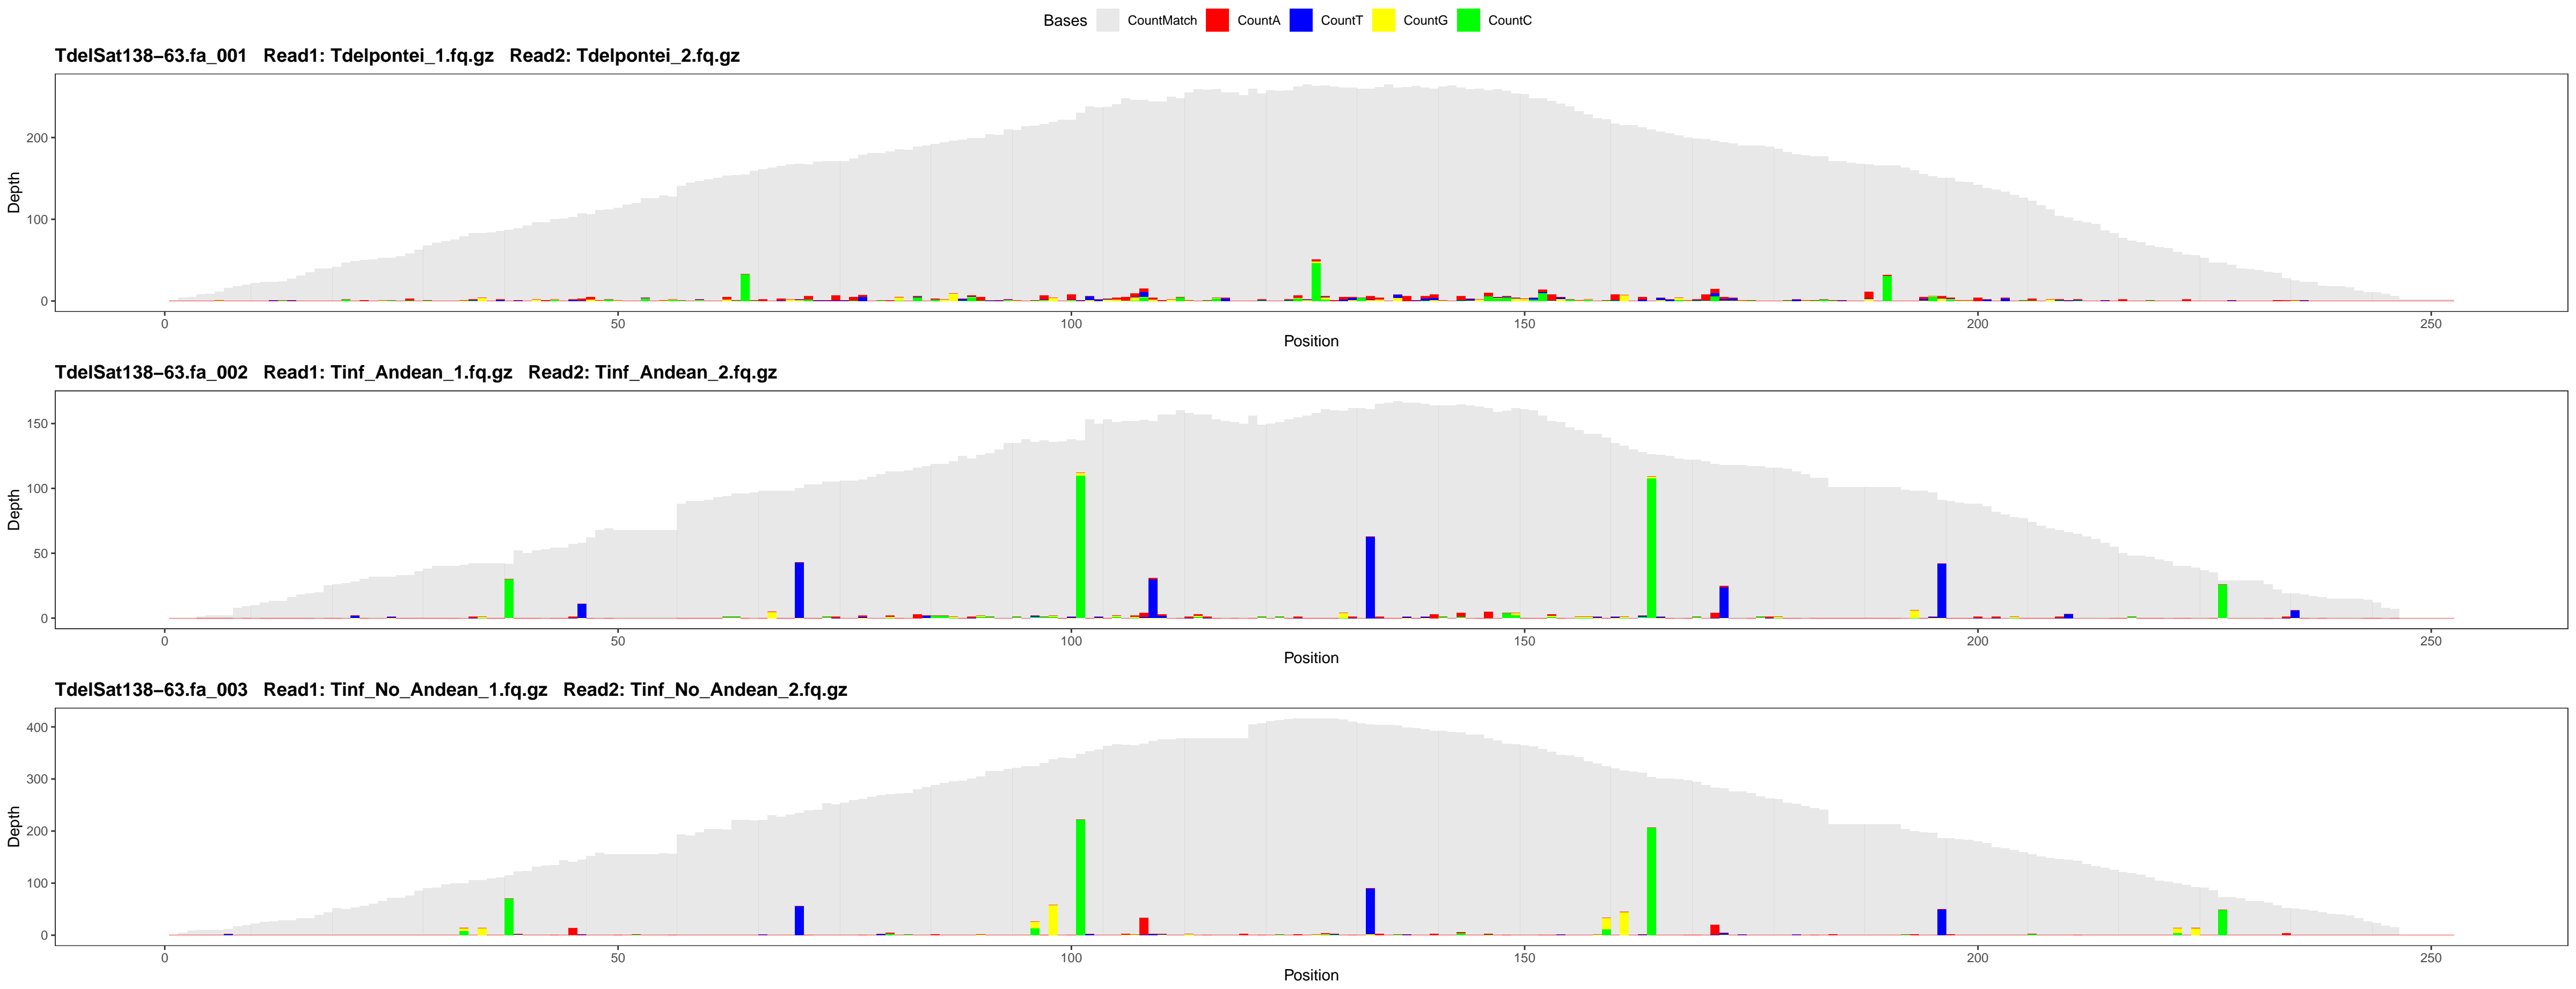

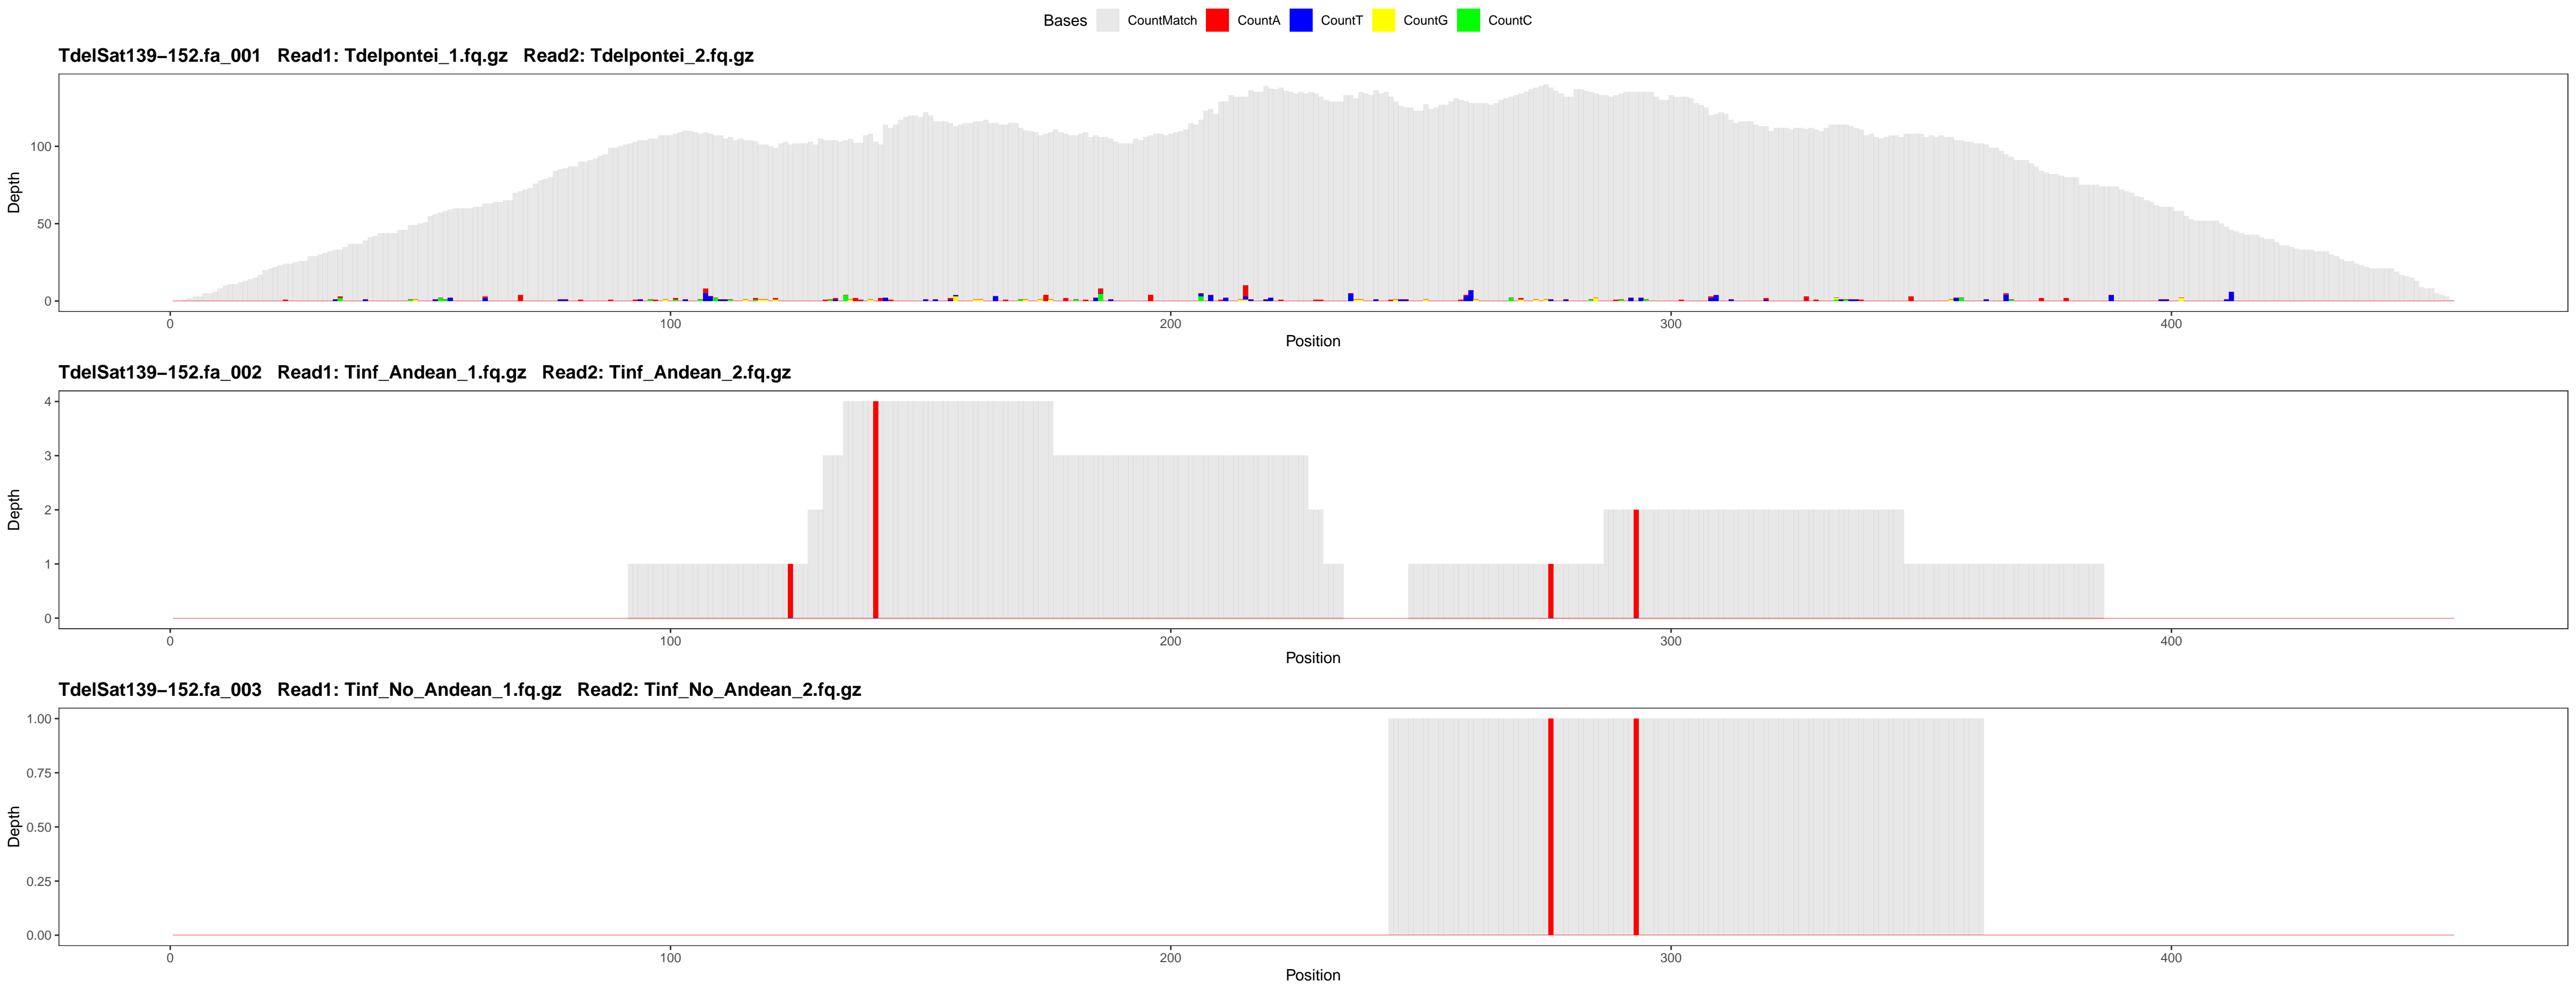

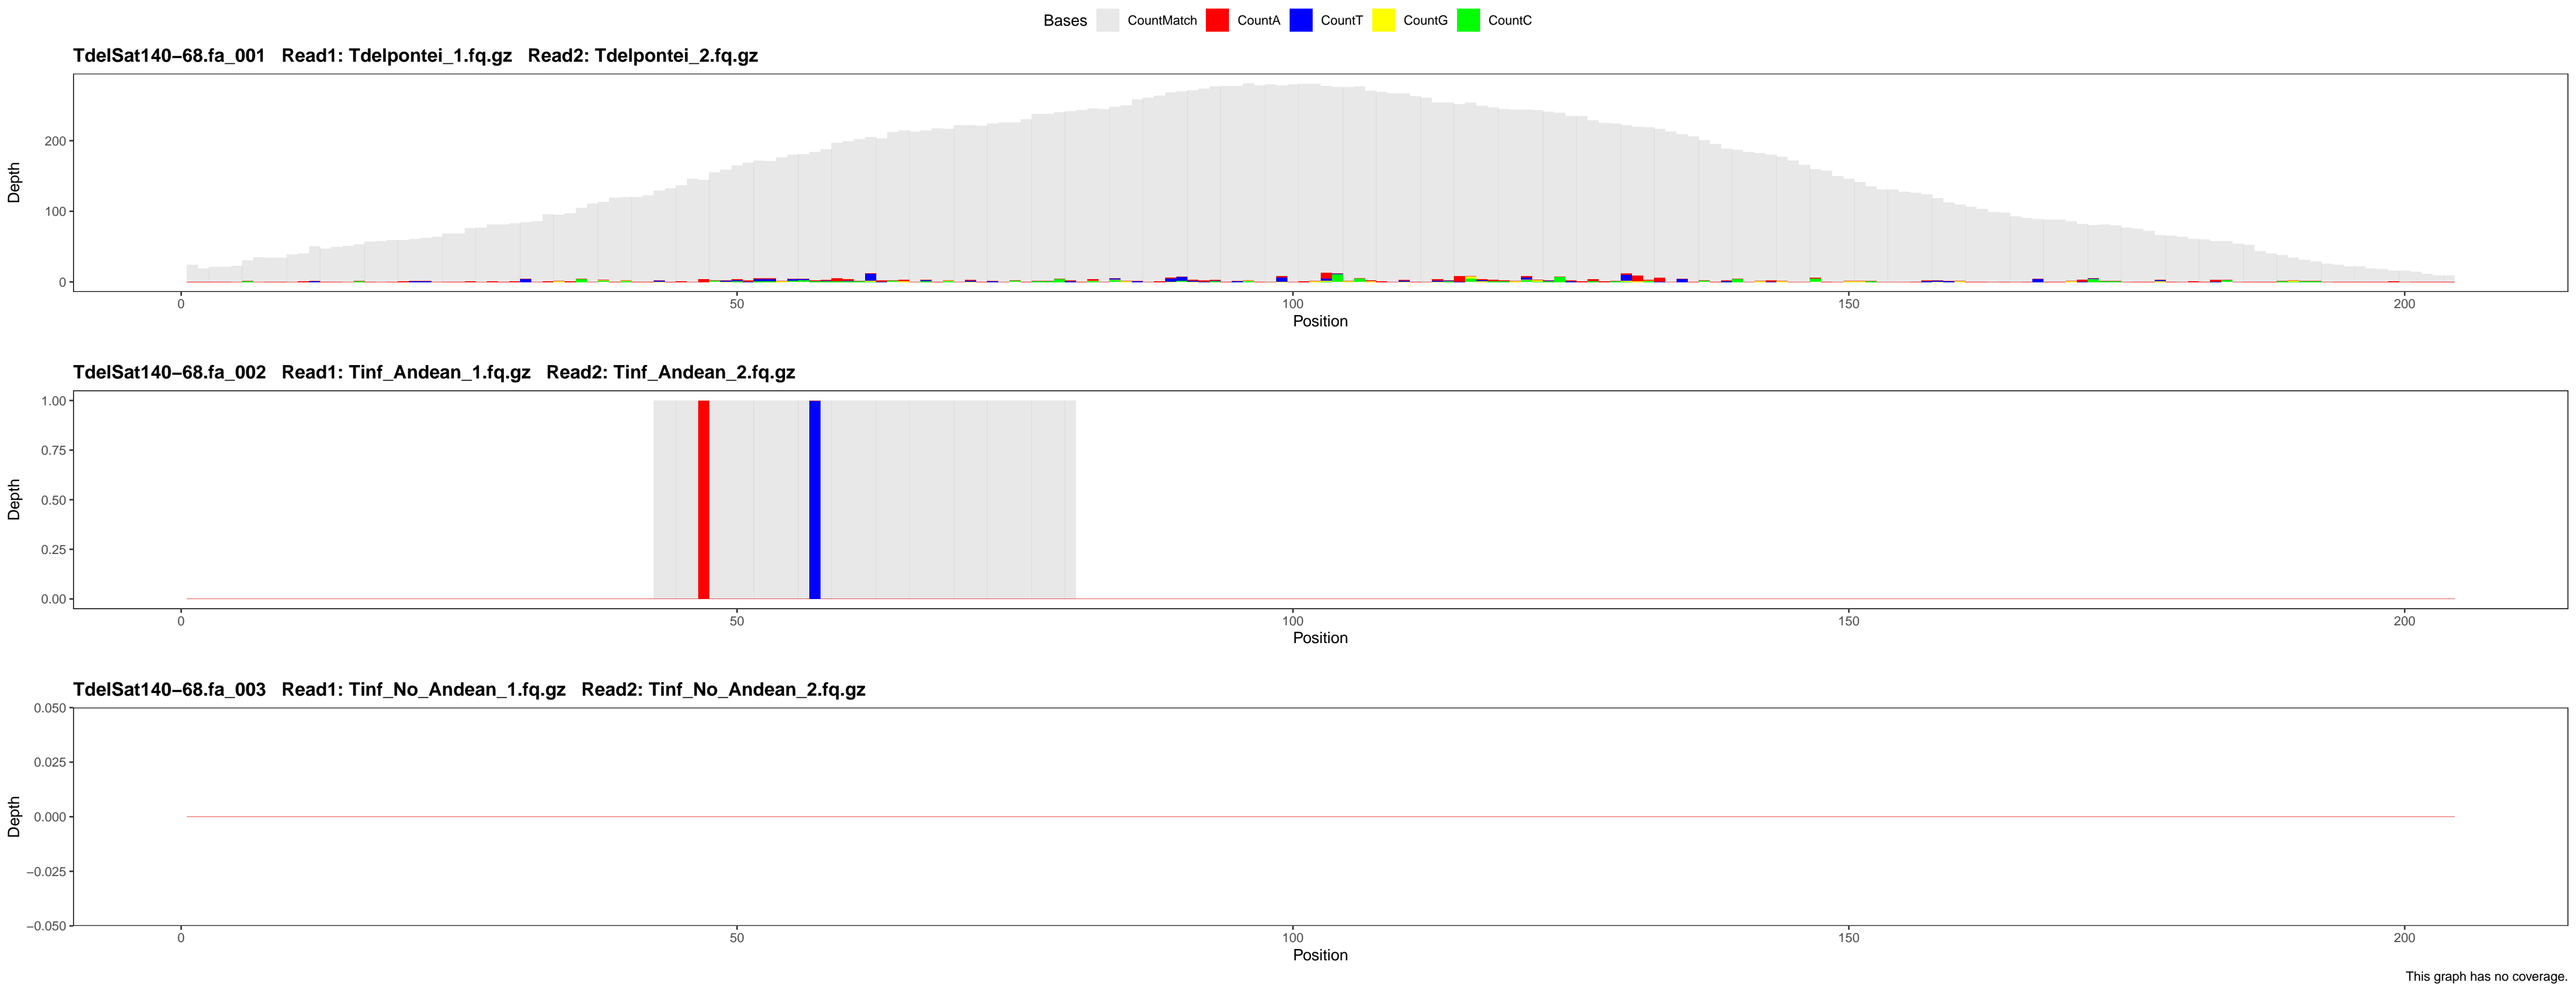

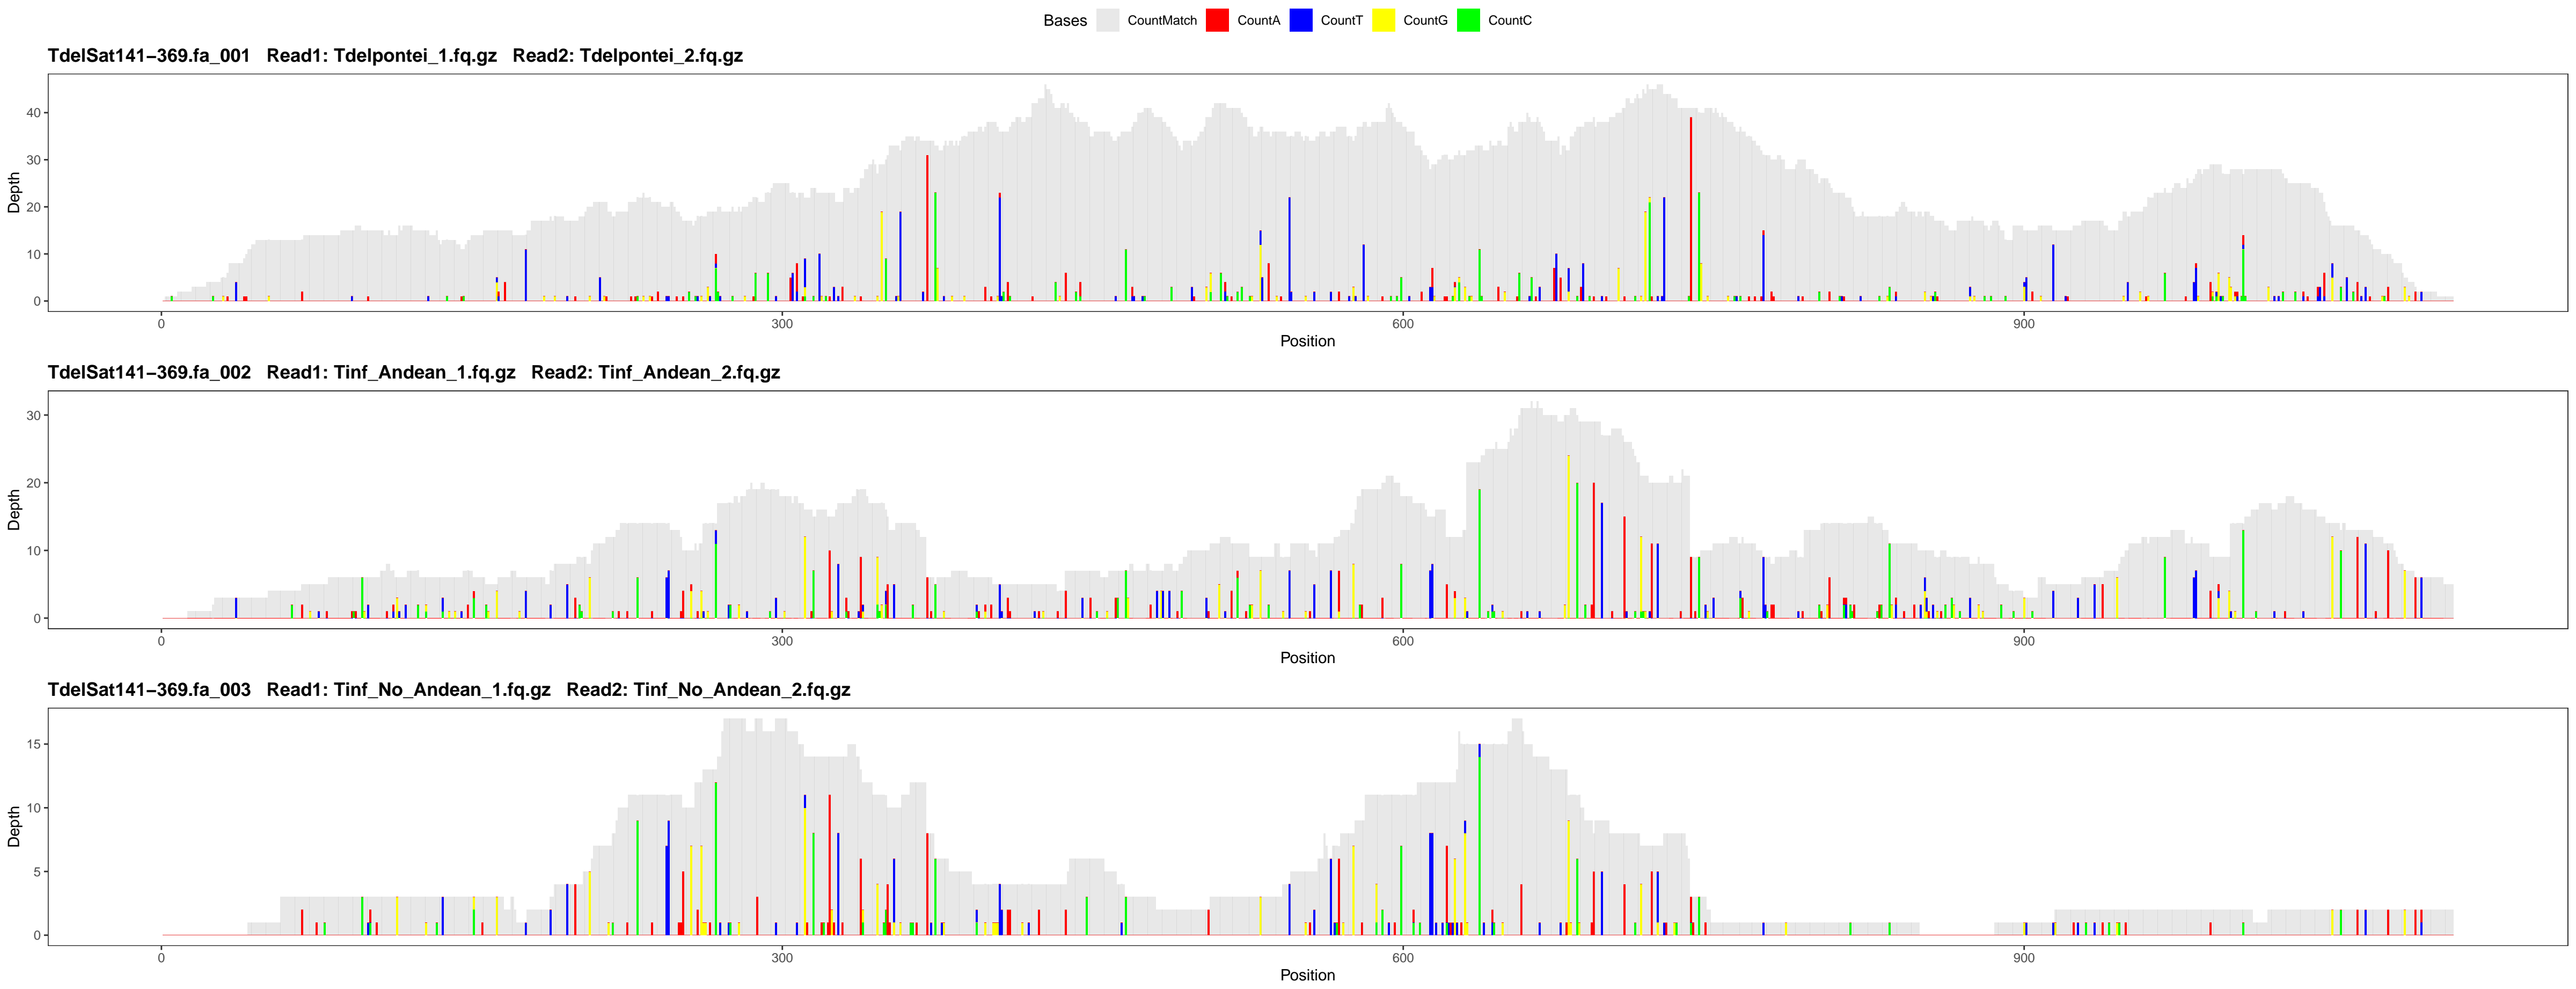

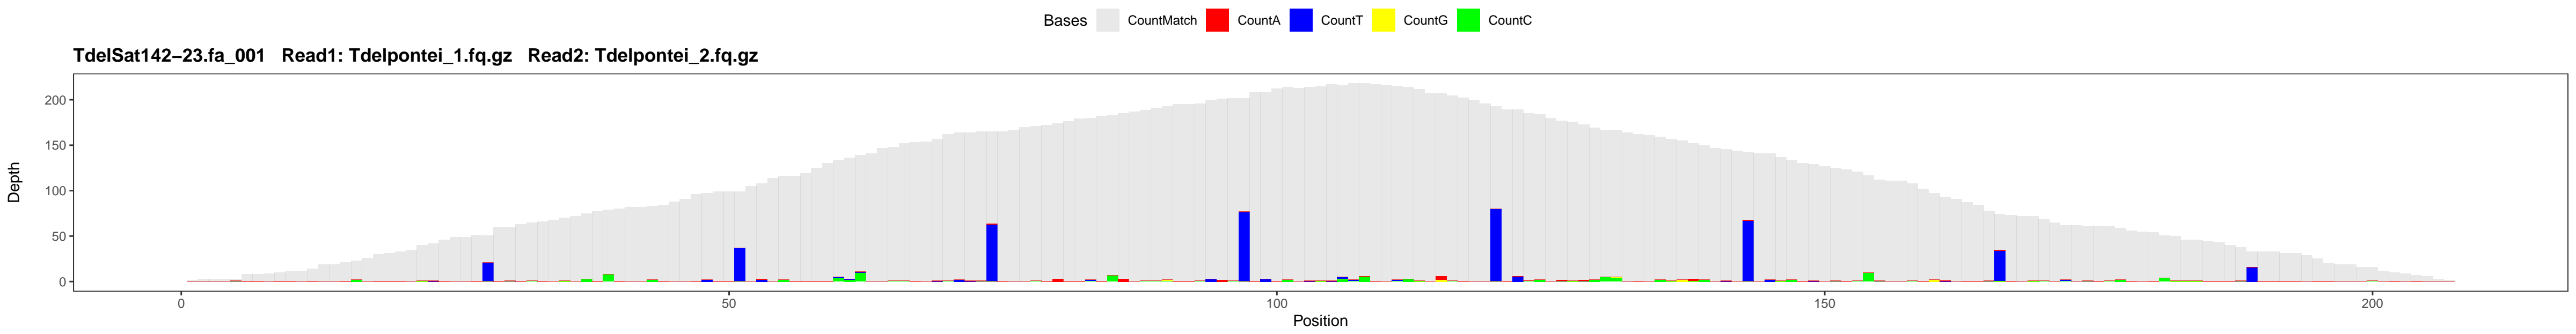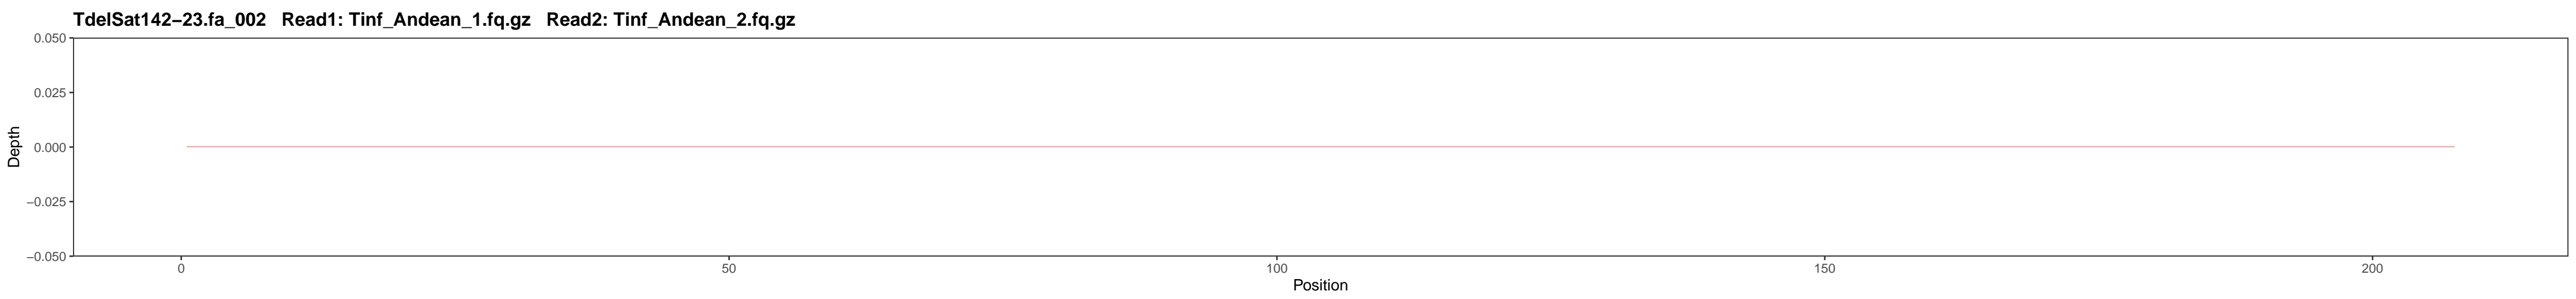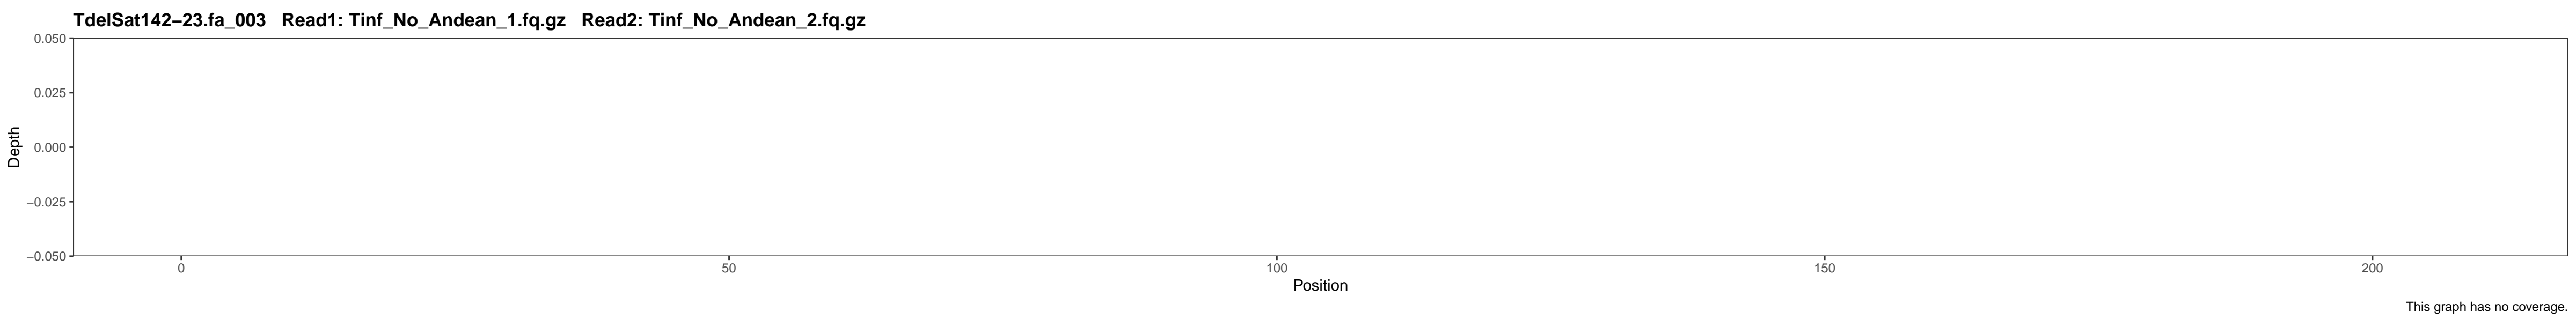



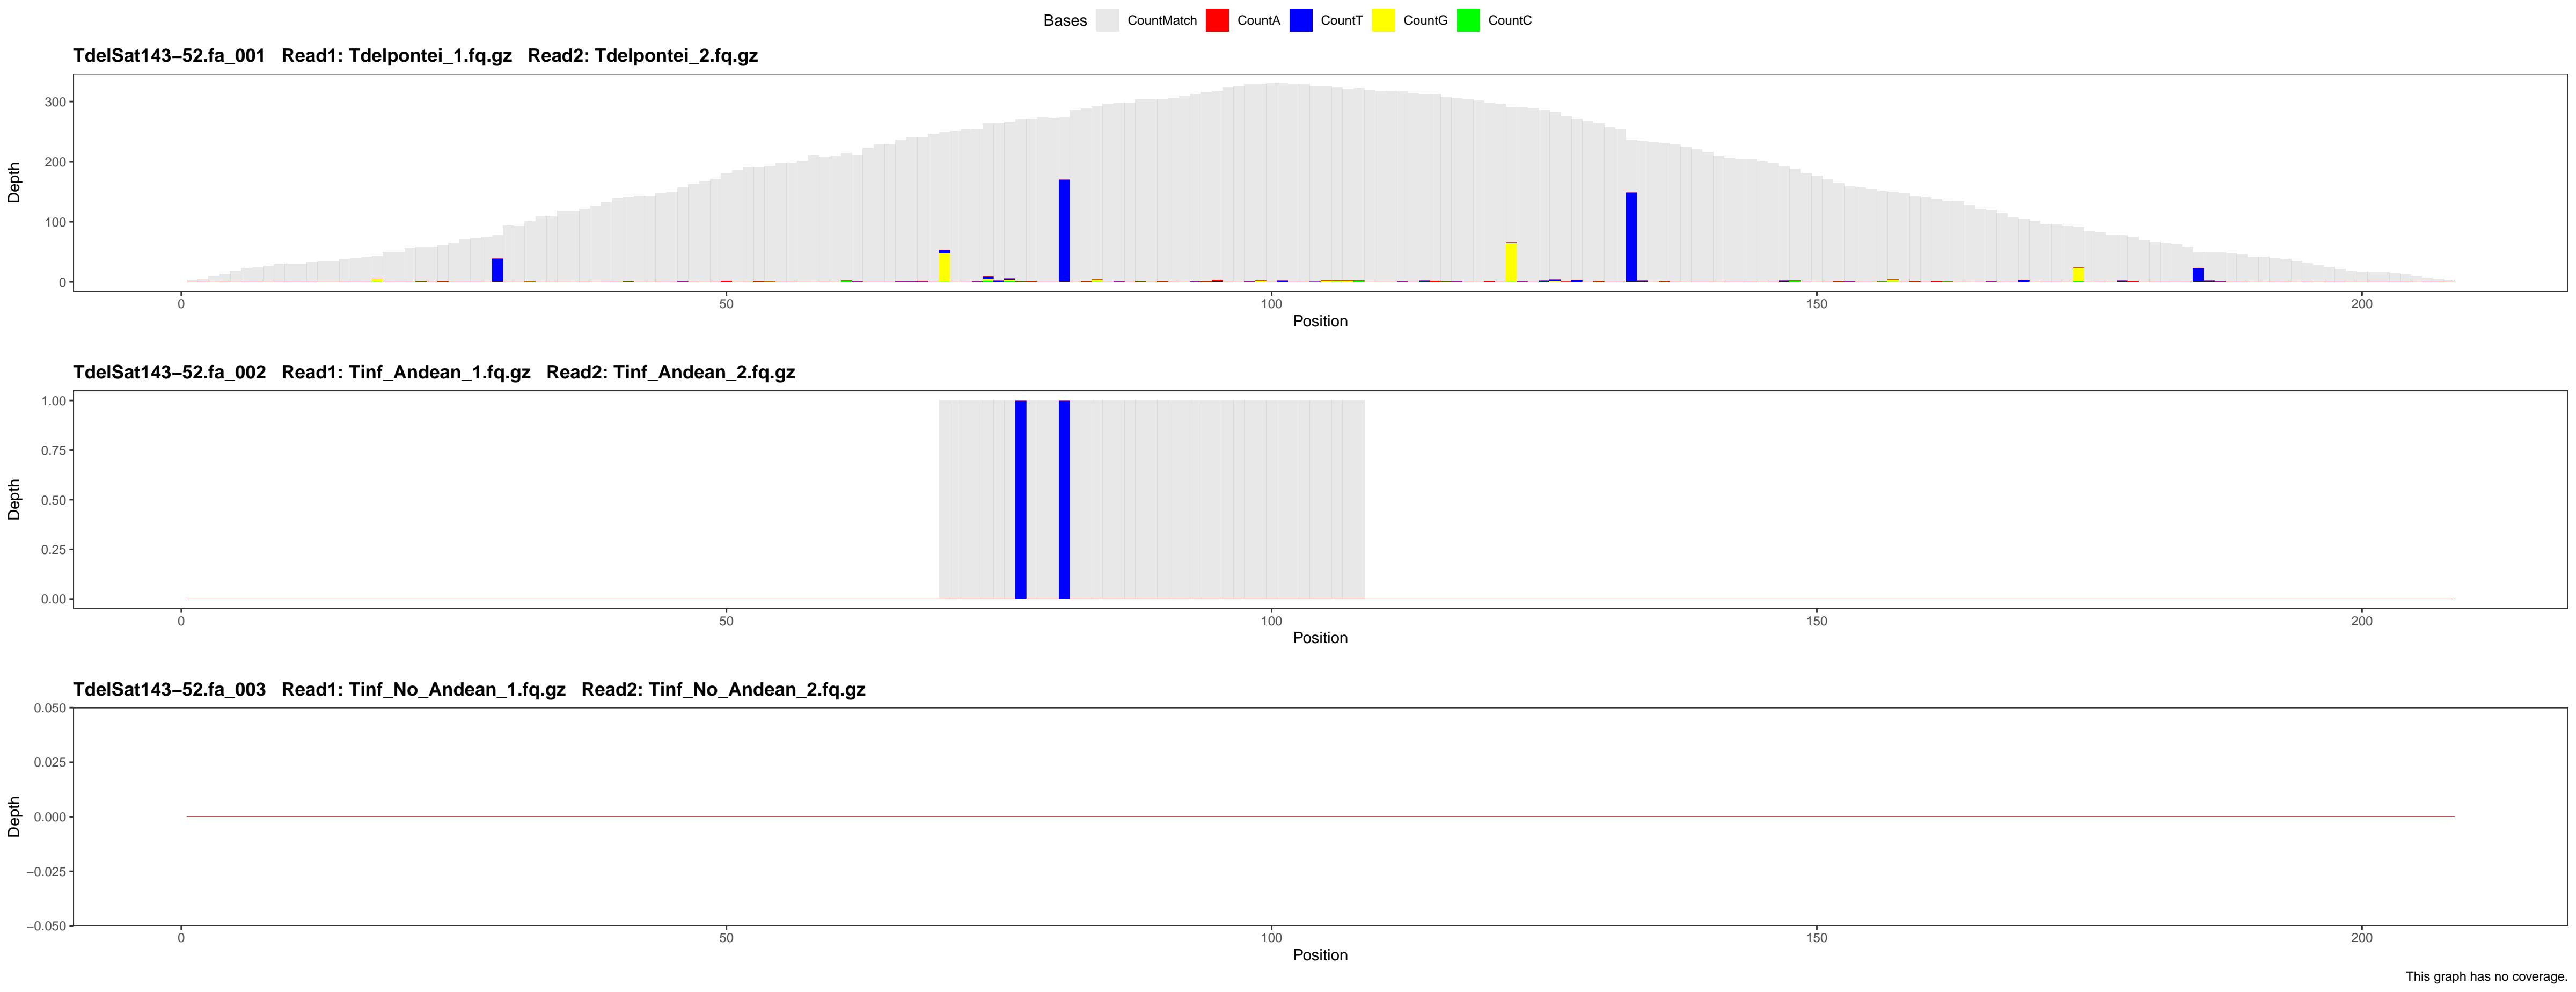

TdelSat143–52.fa\_002

Read1: Tinf\_Andean\_1.fq.gz

Read2: Tinf\_Andean\_2.fq.gz

Depth

Position

TdelSat143–52.fa\_003

Read1: Tinf\_No\_Andean\_1.fq.gz

Read2: Tinf\_No\_Andean\_2.fq.gz

Depth

Position

This graph has no coverage.

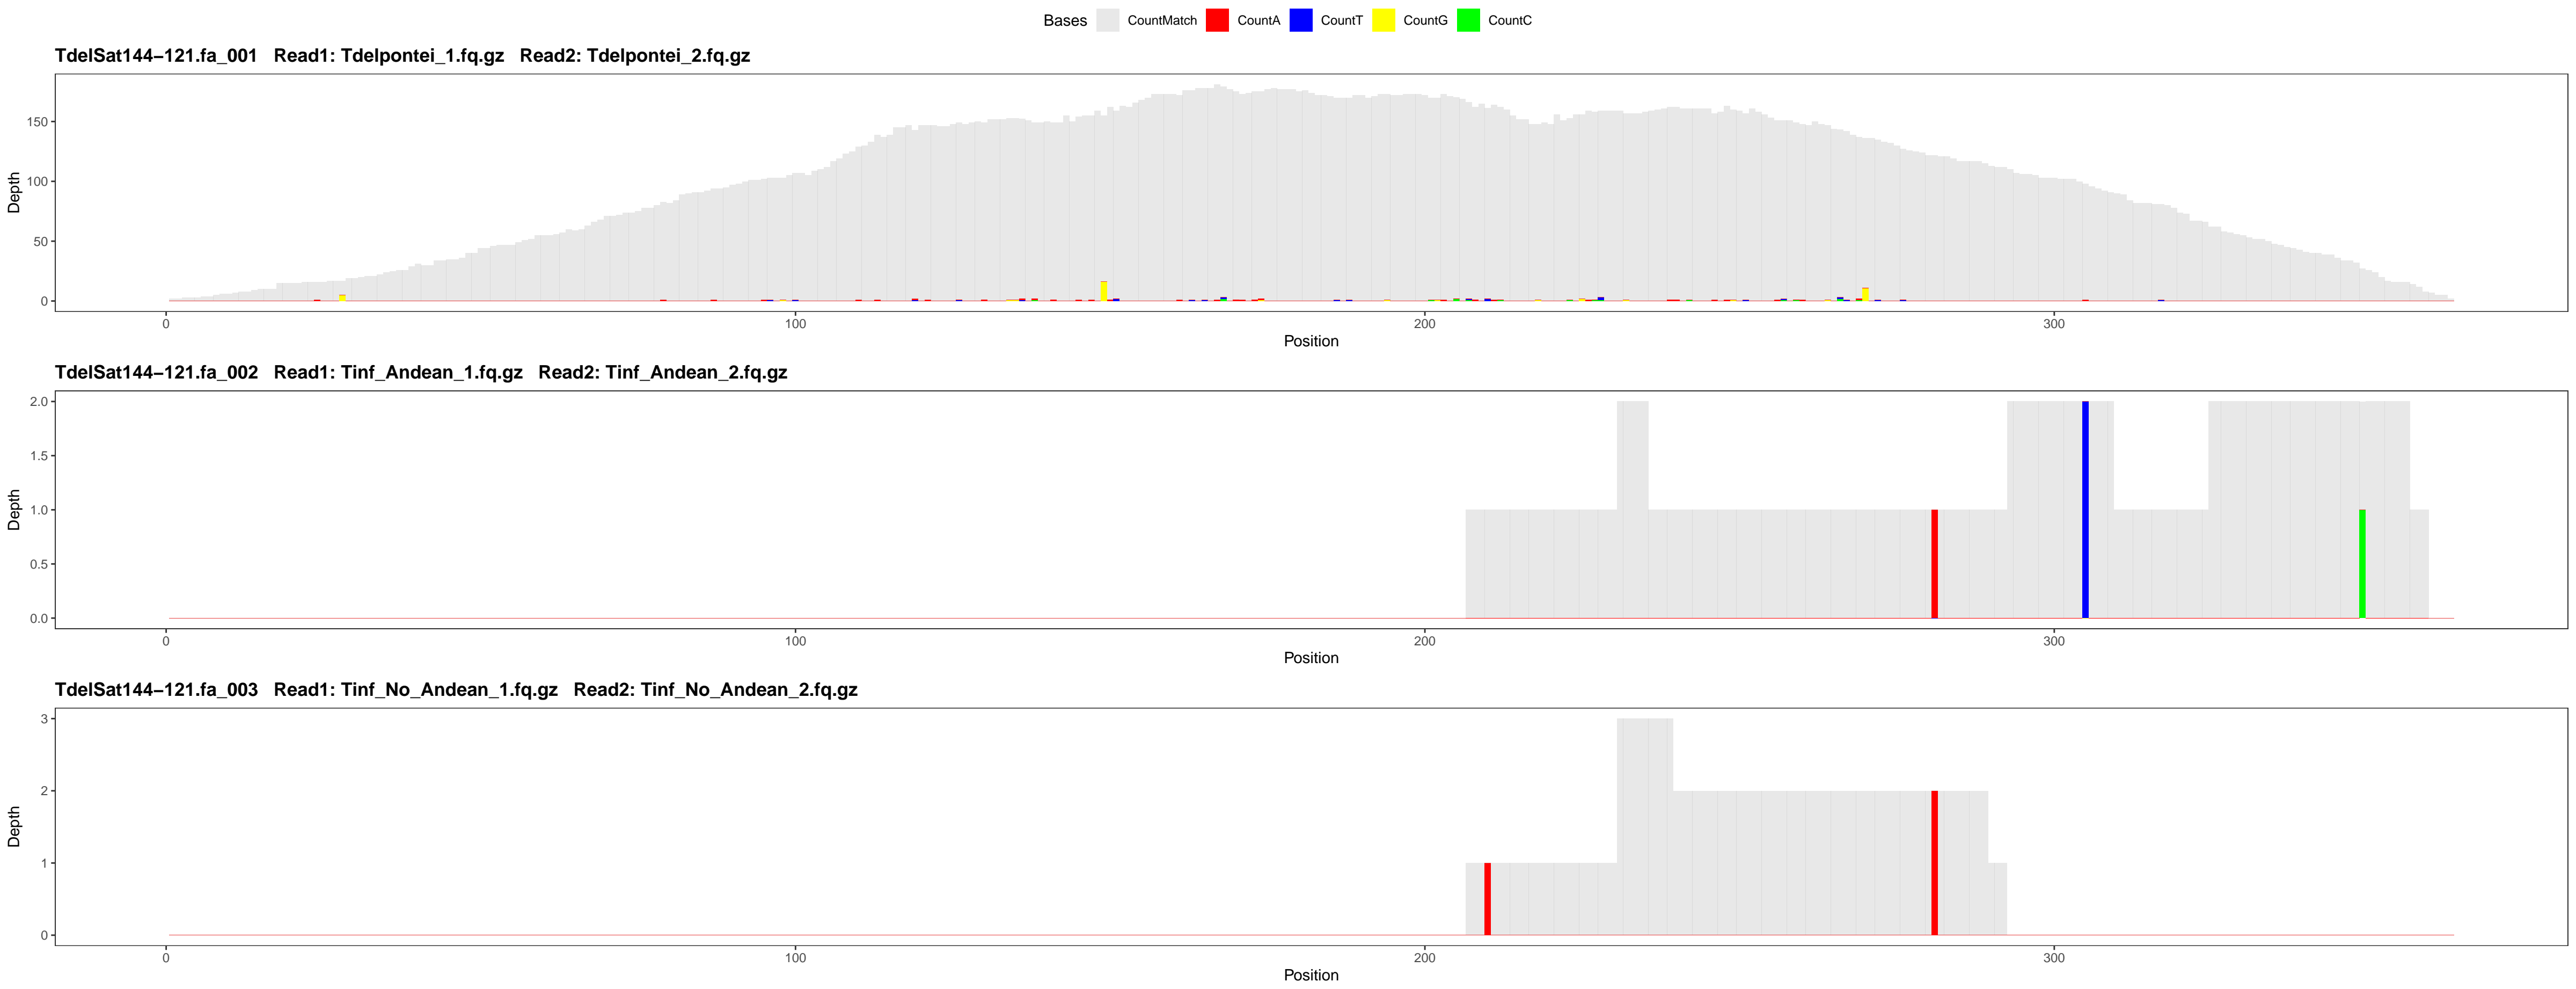

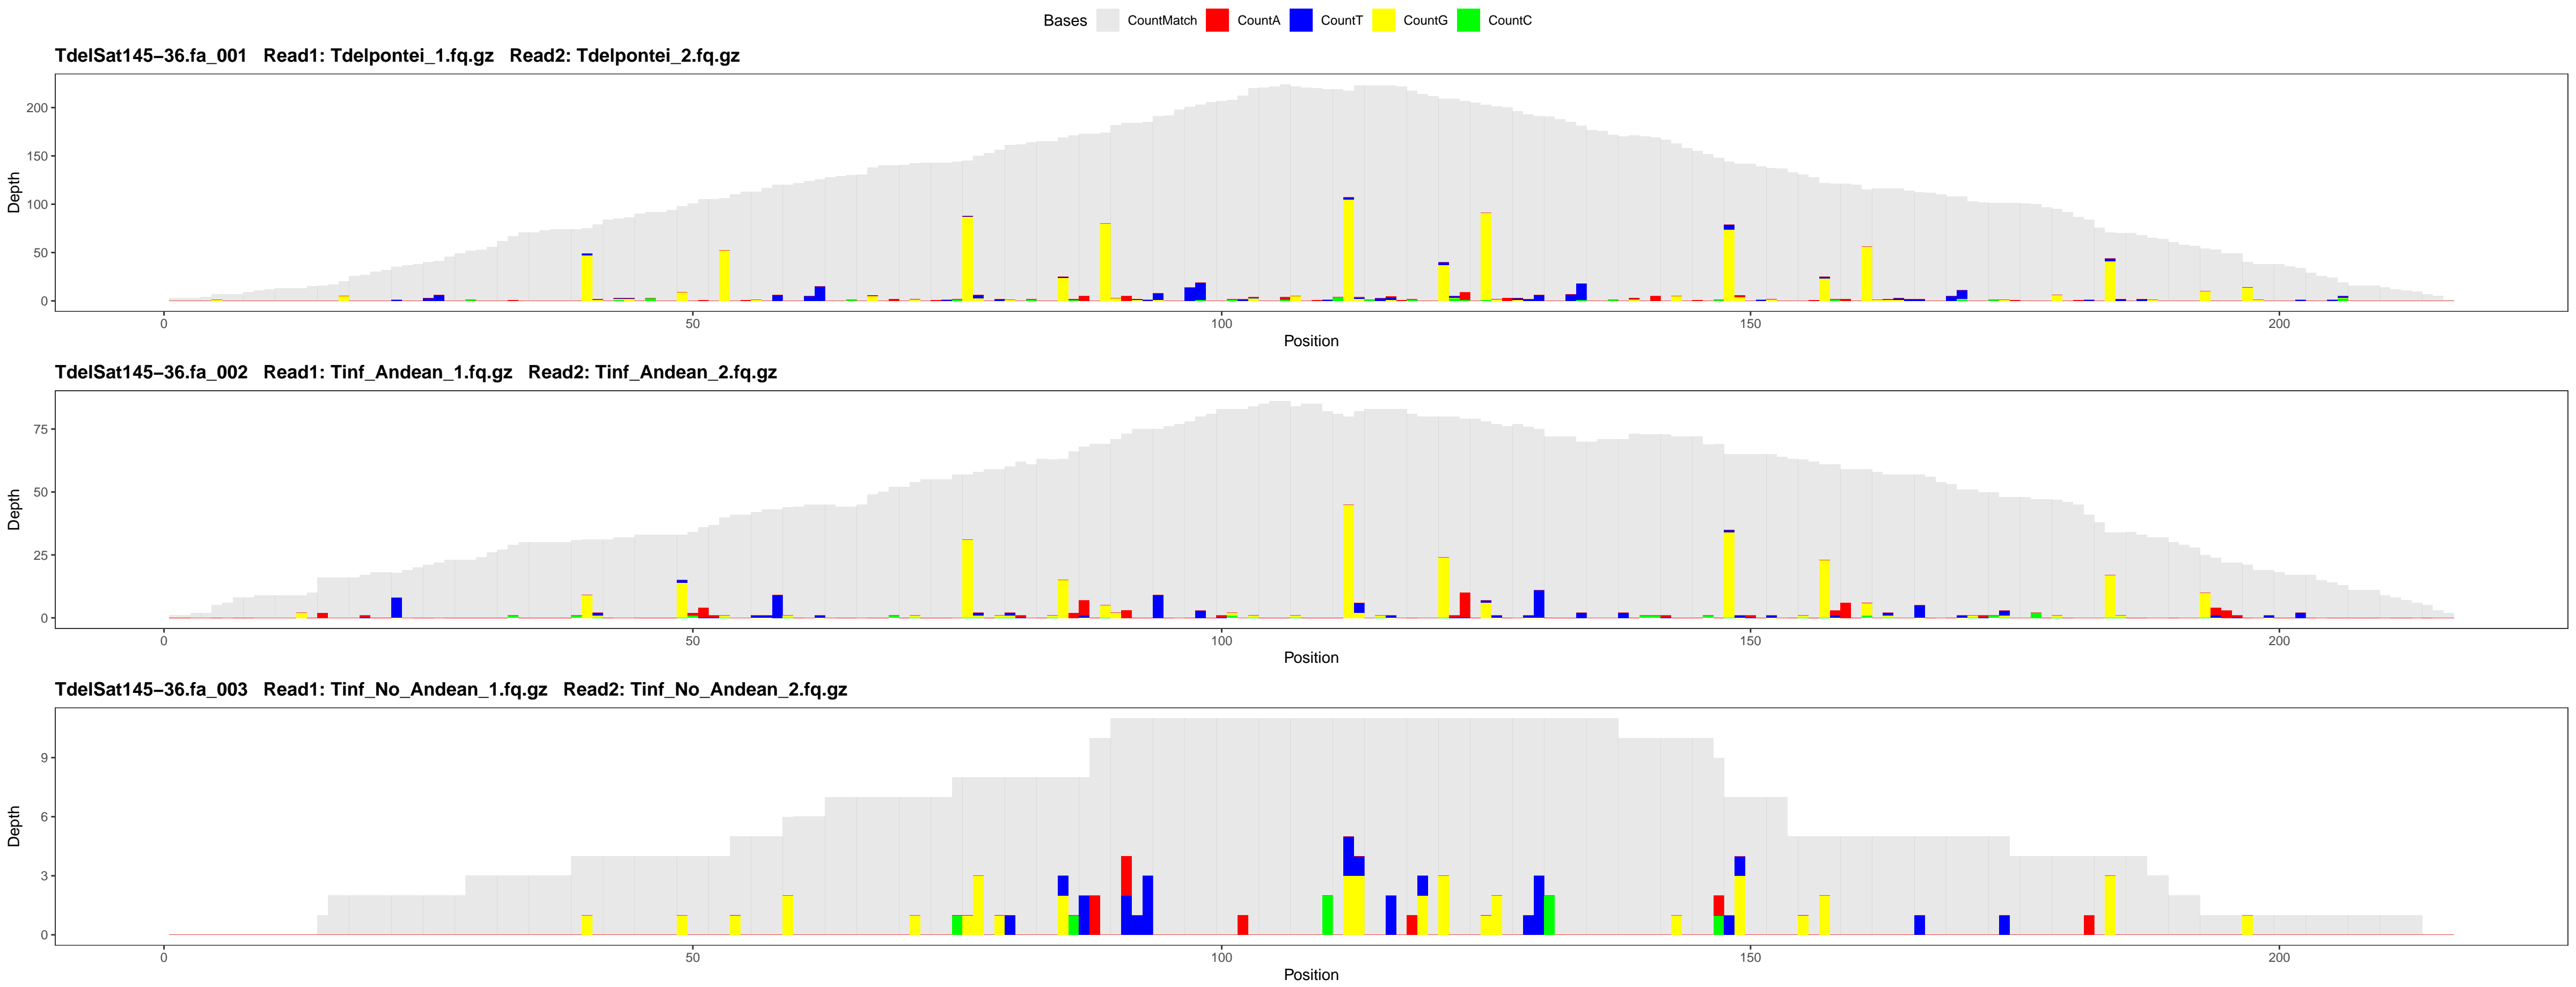

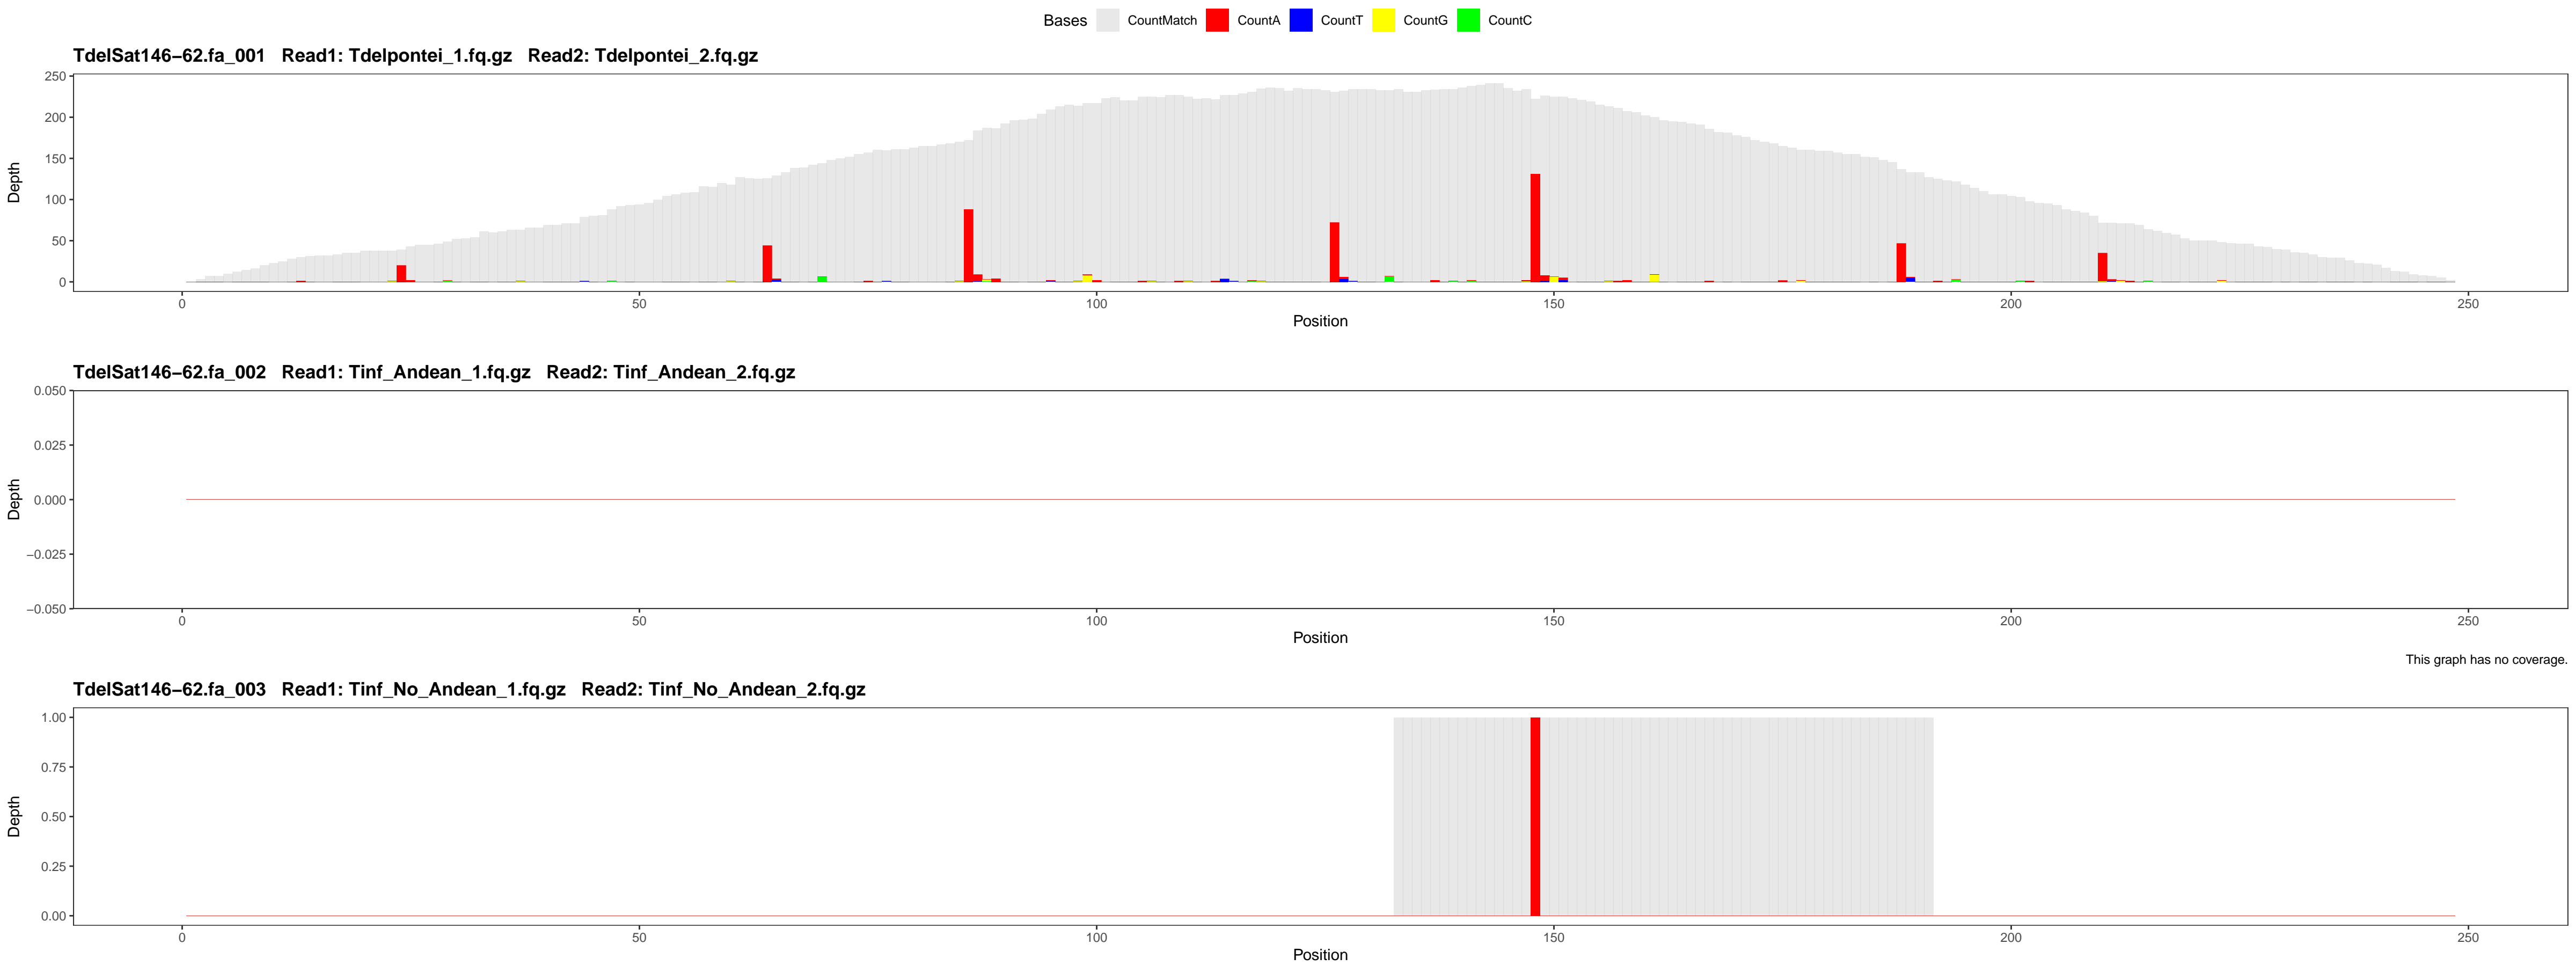

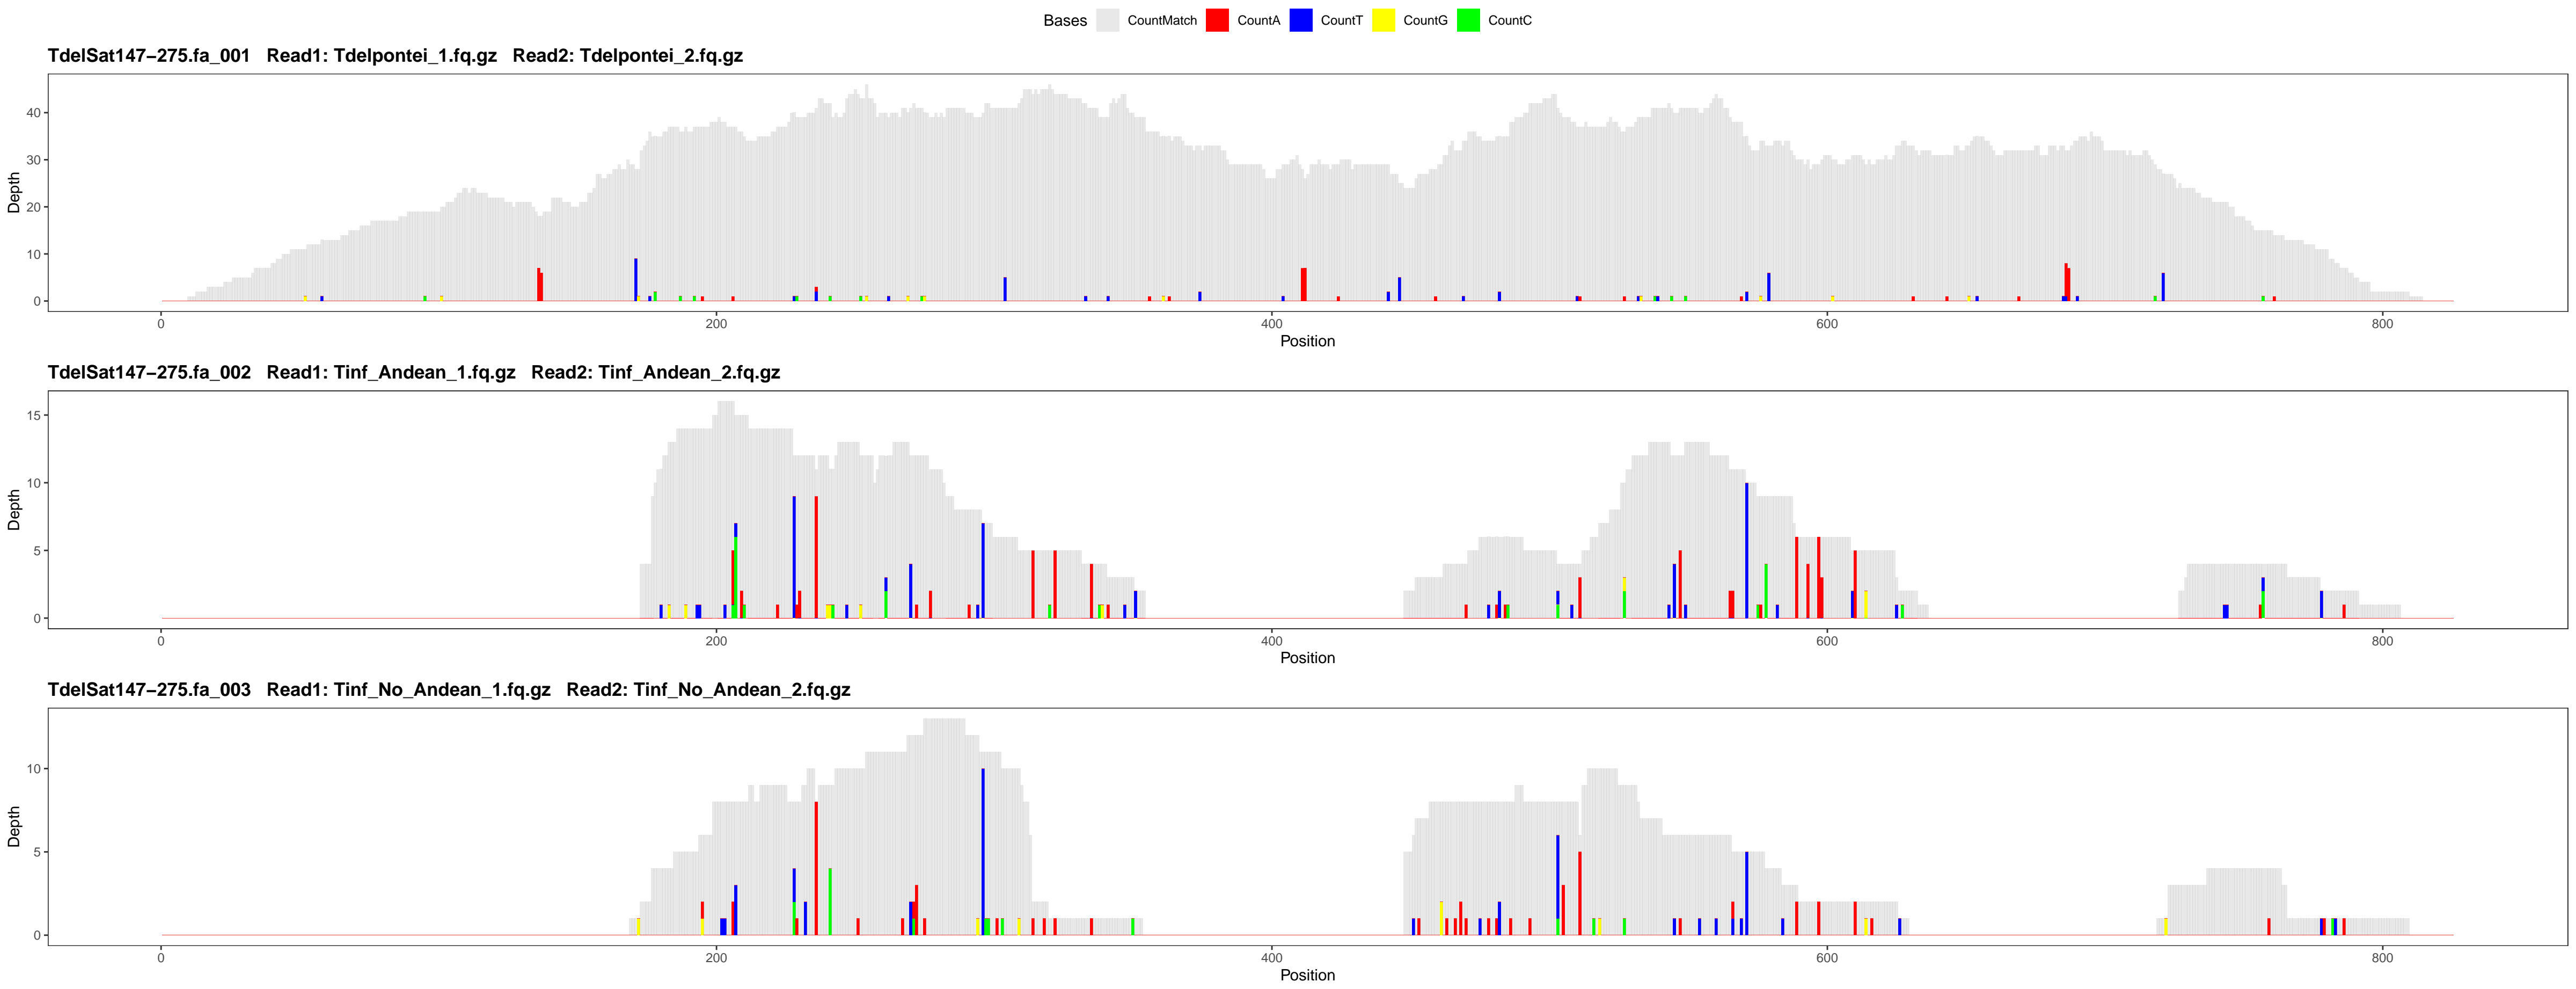

Bases CountMatch CountA CountT CountG CountC

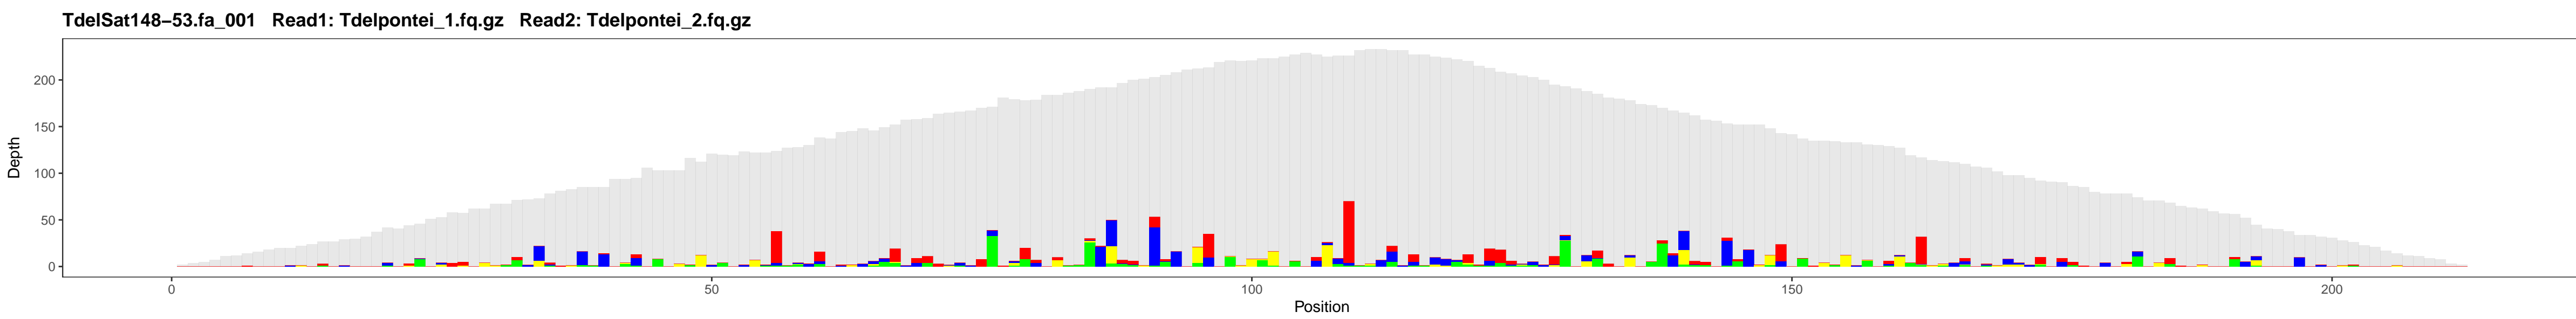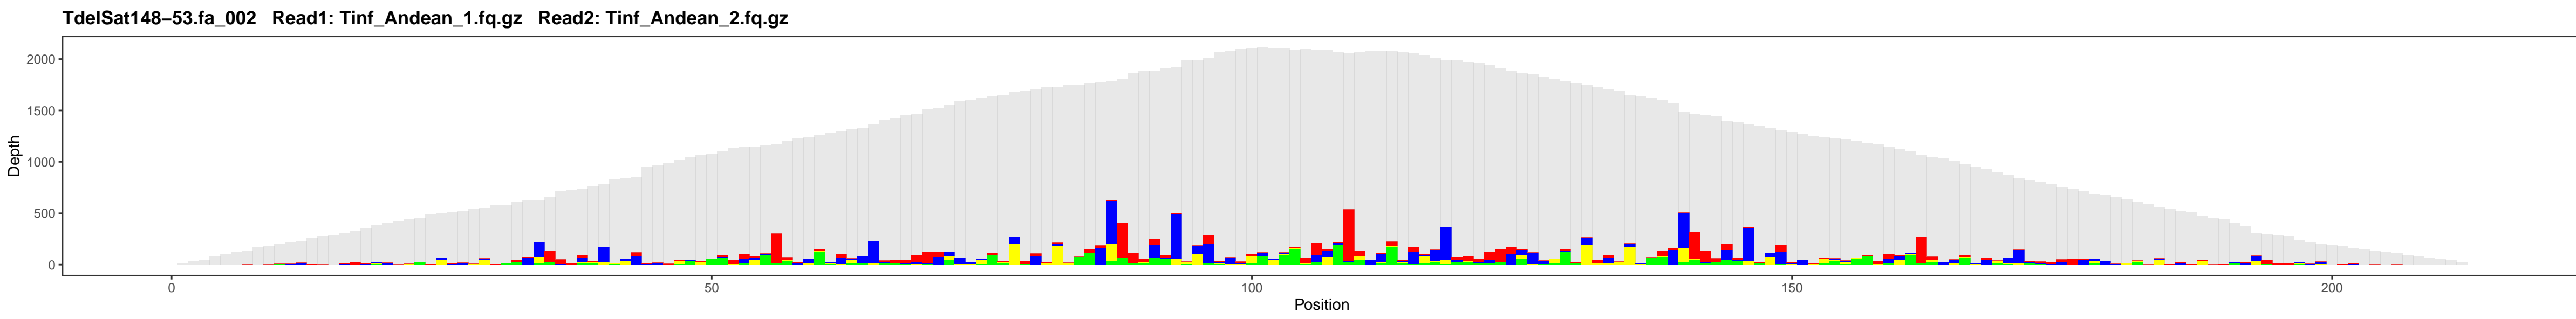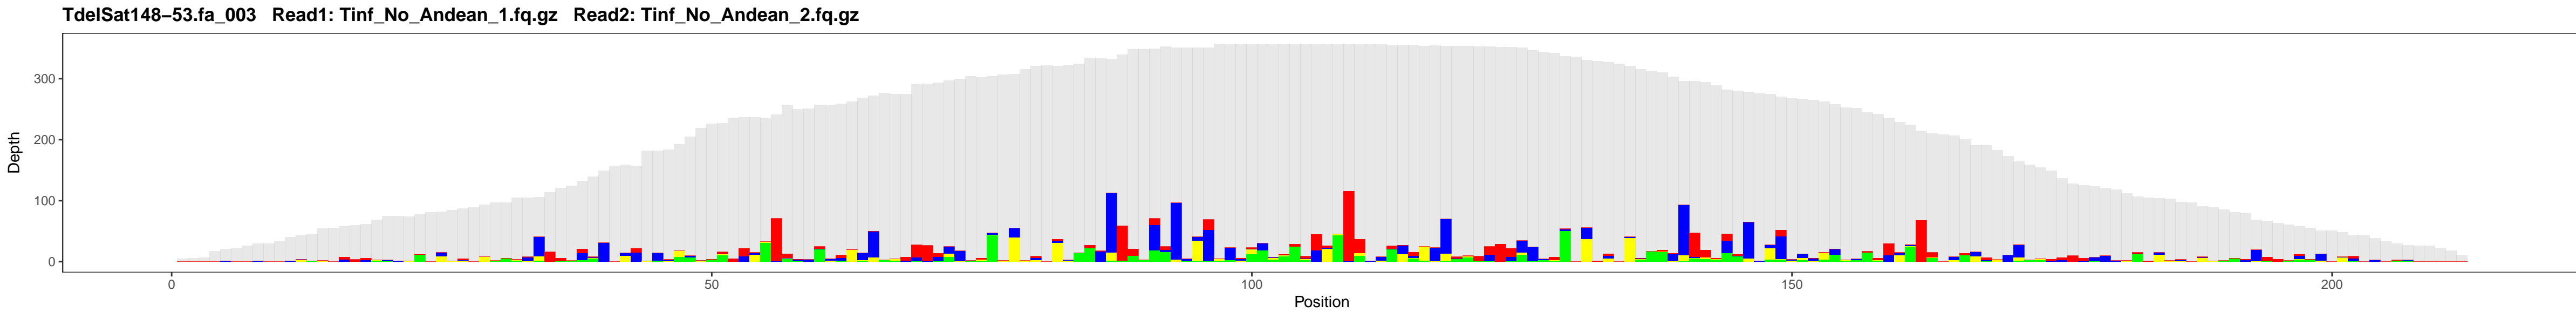

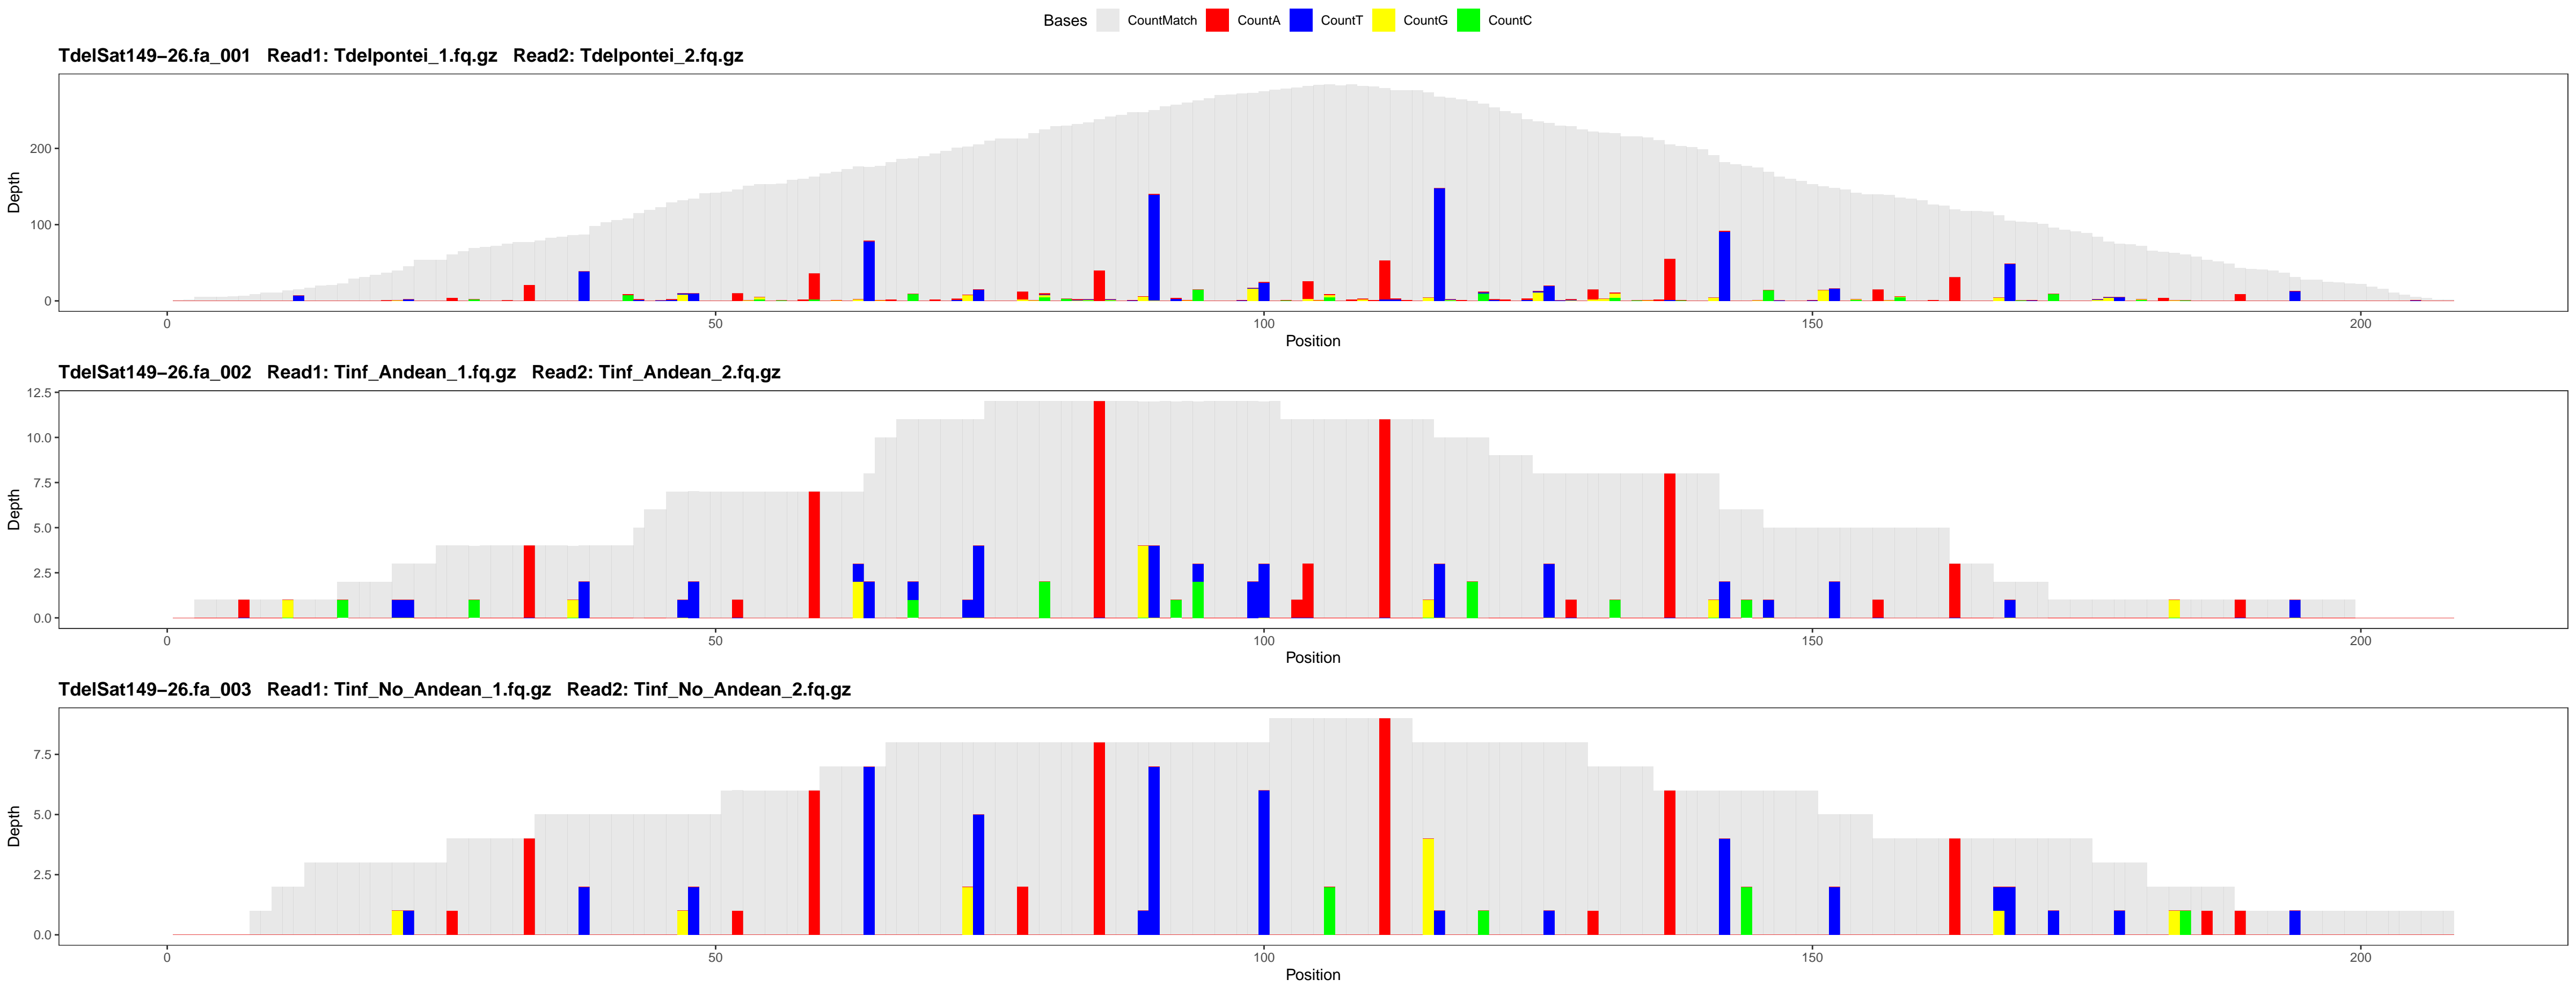

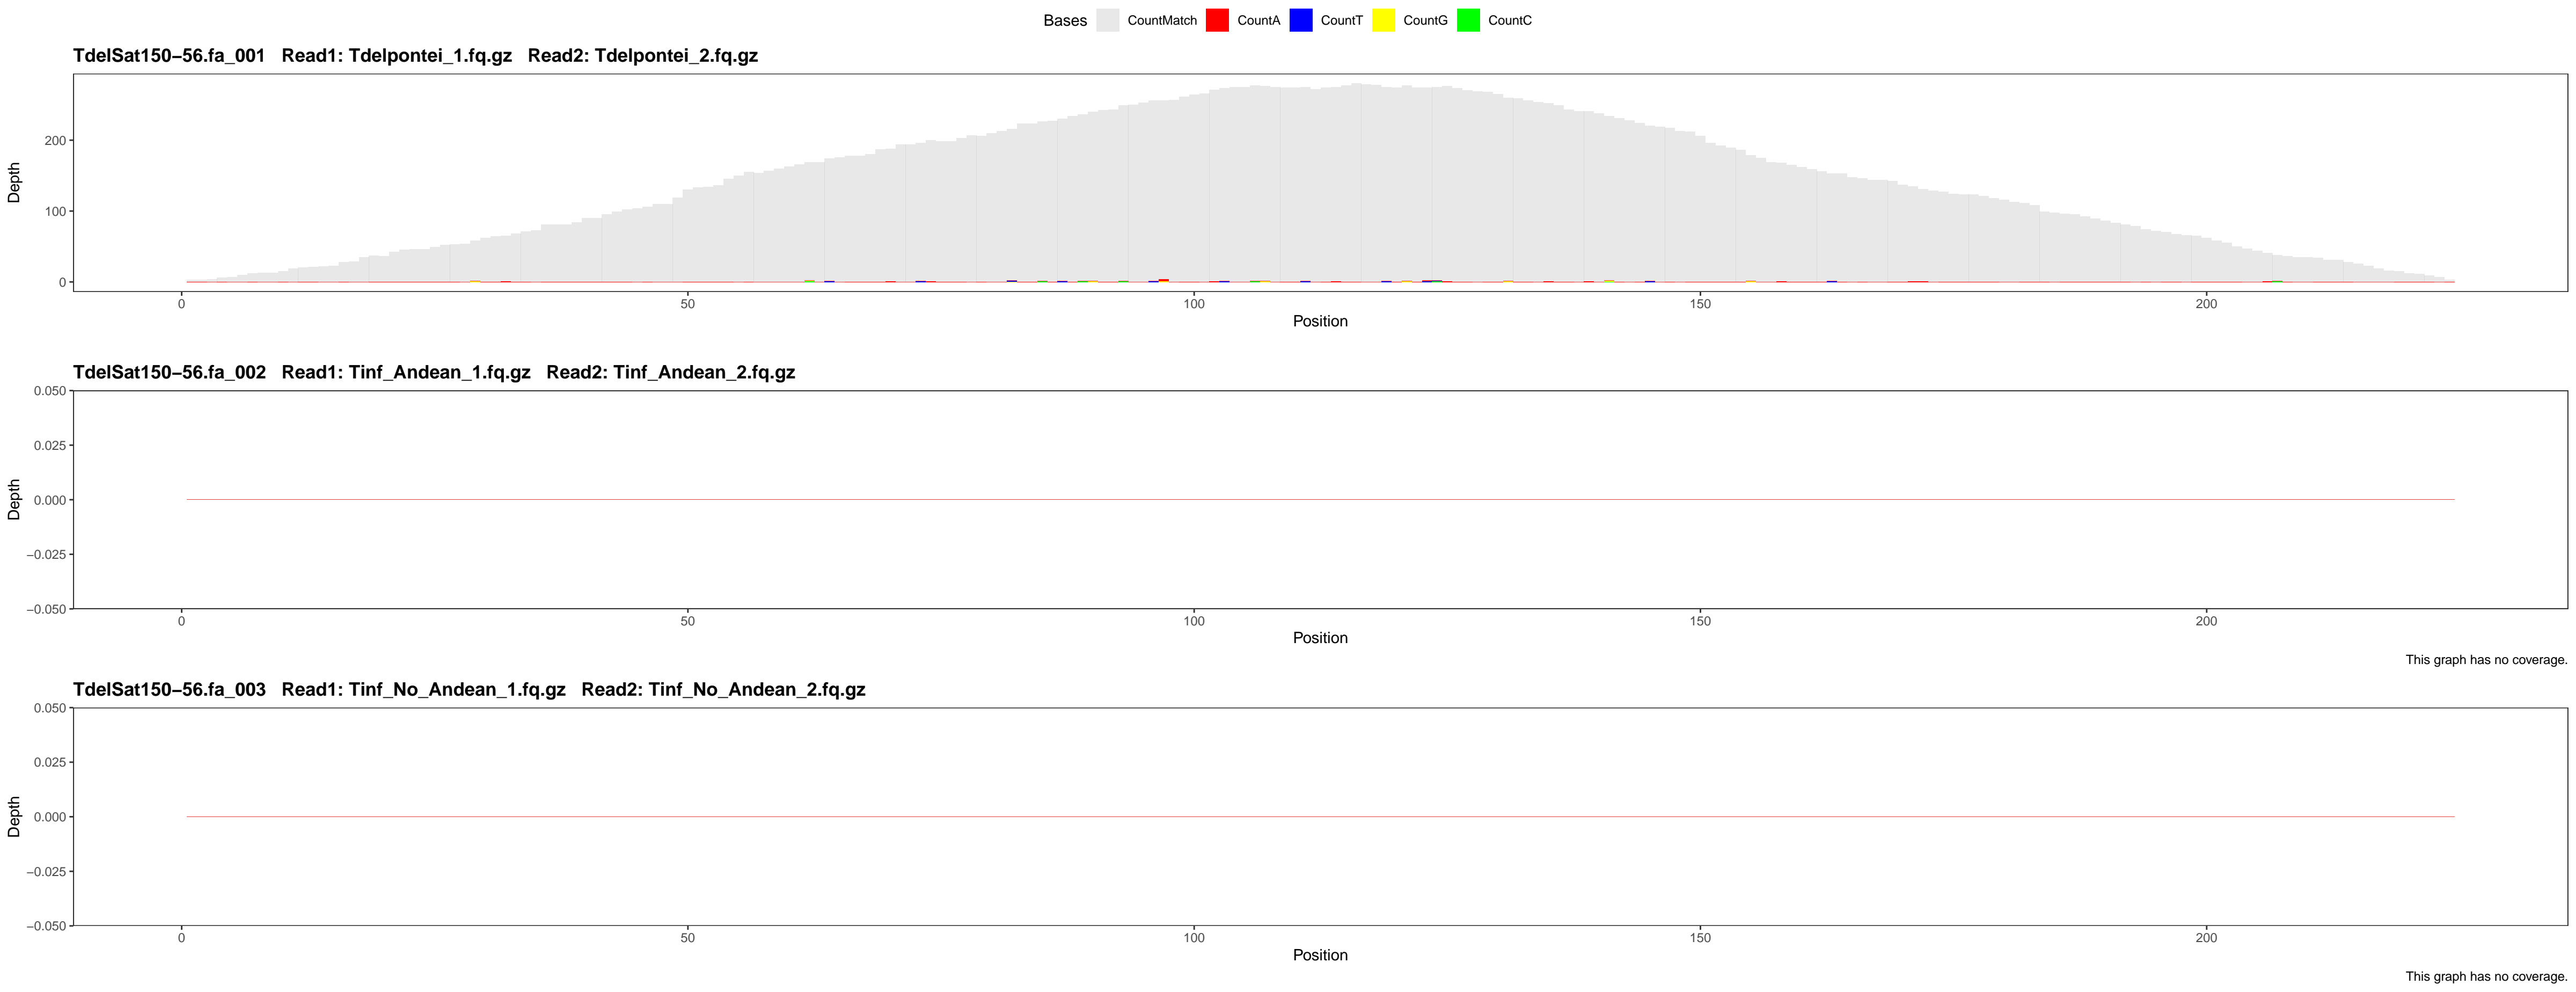

This graph has no coverage.

This graph has no coverage.



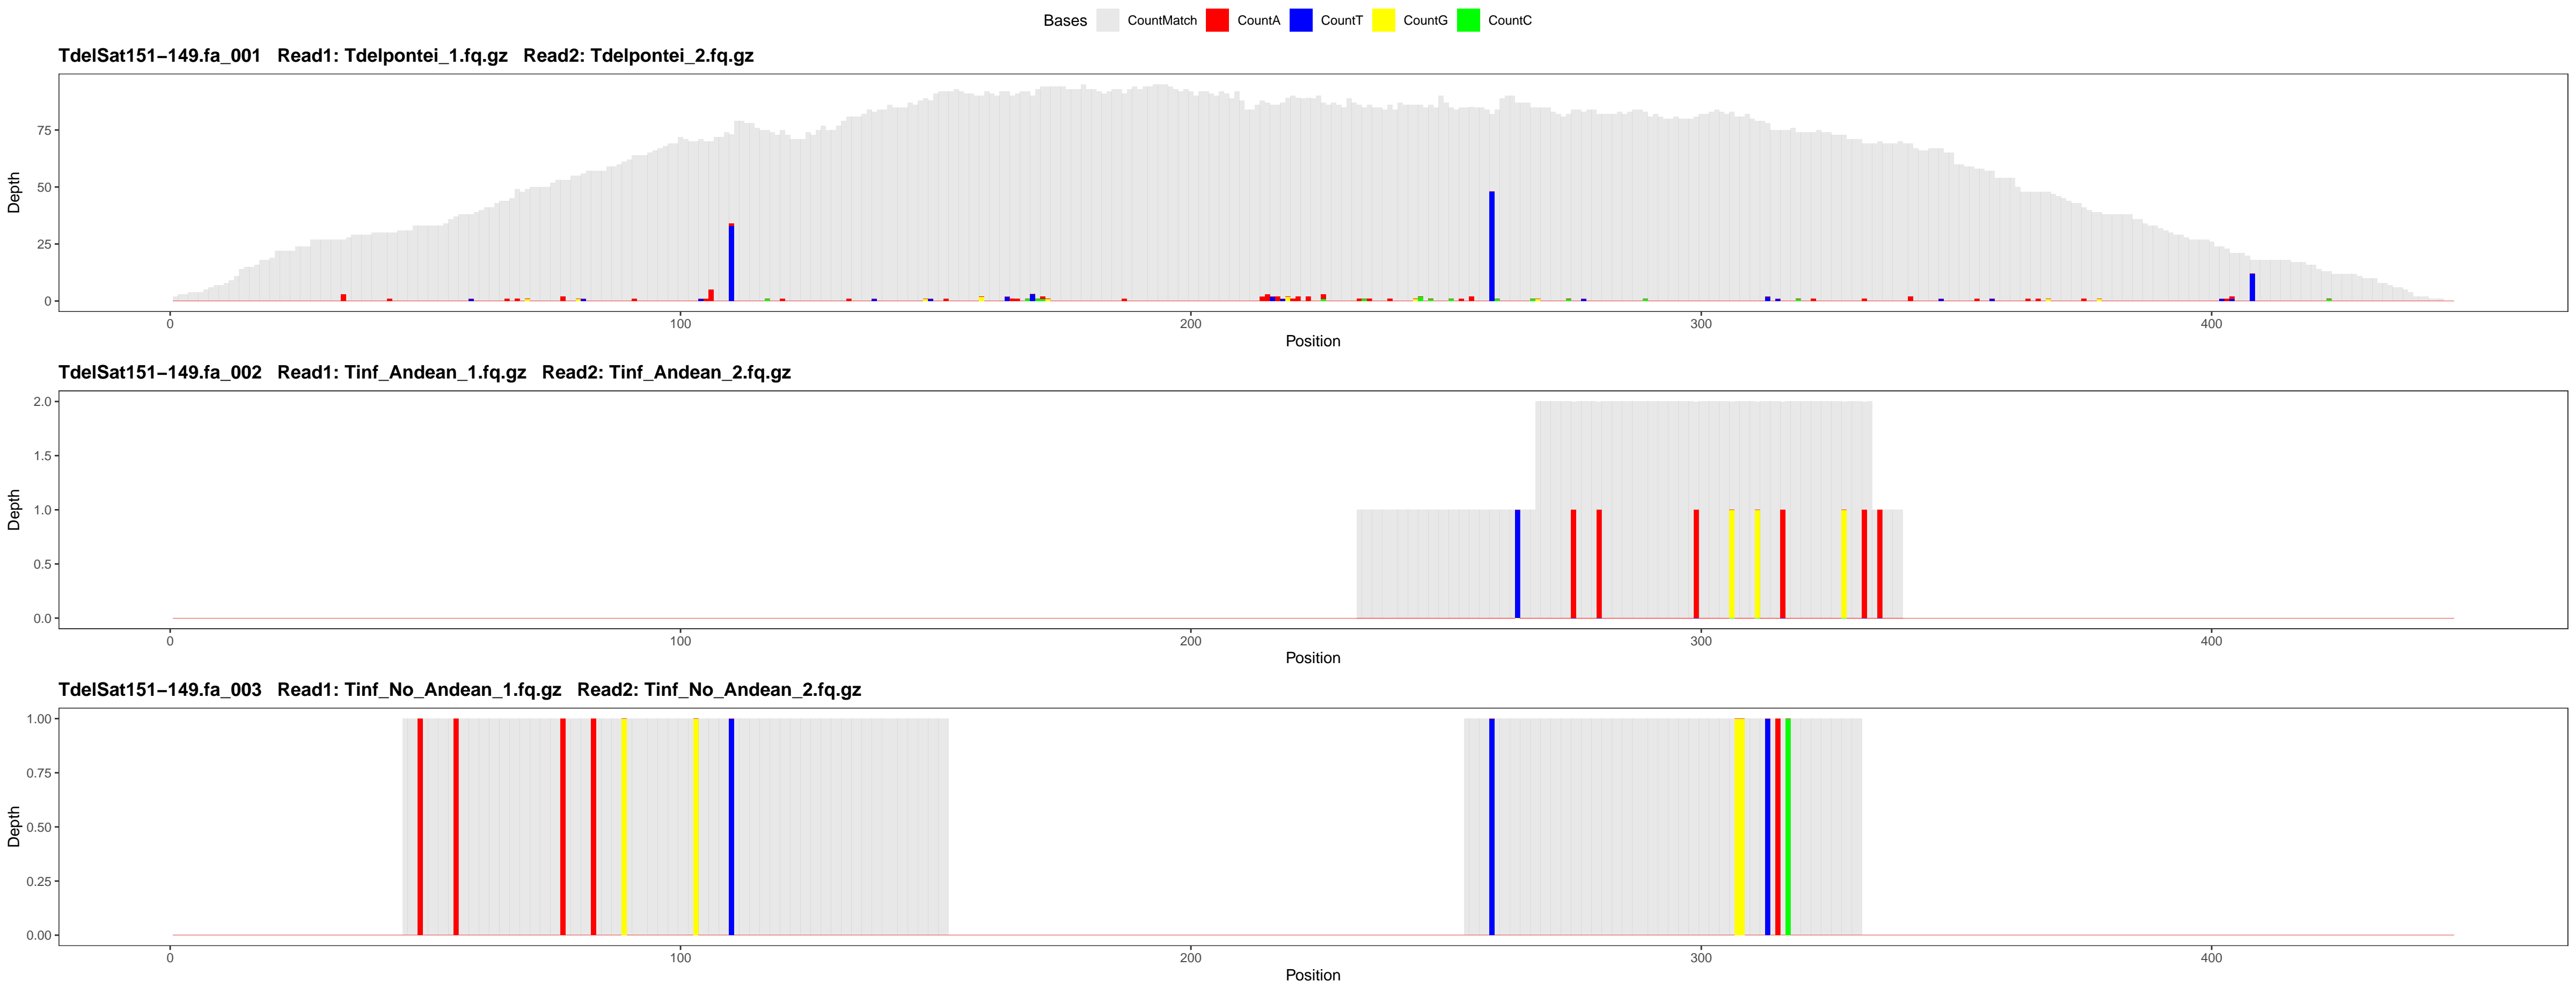

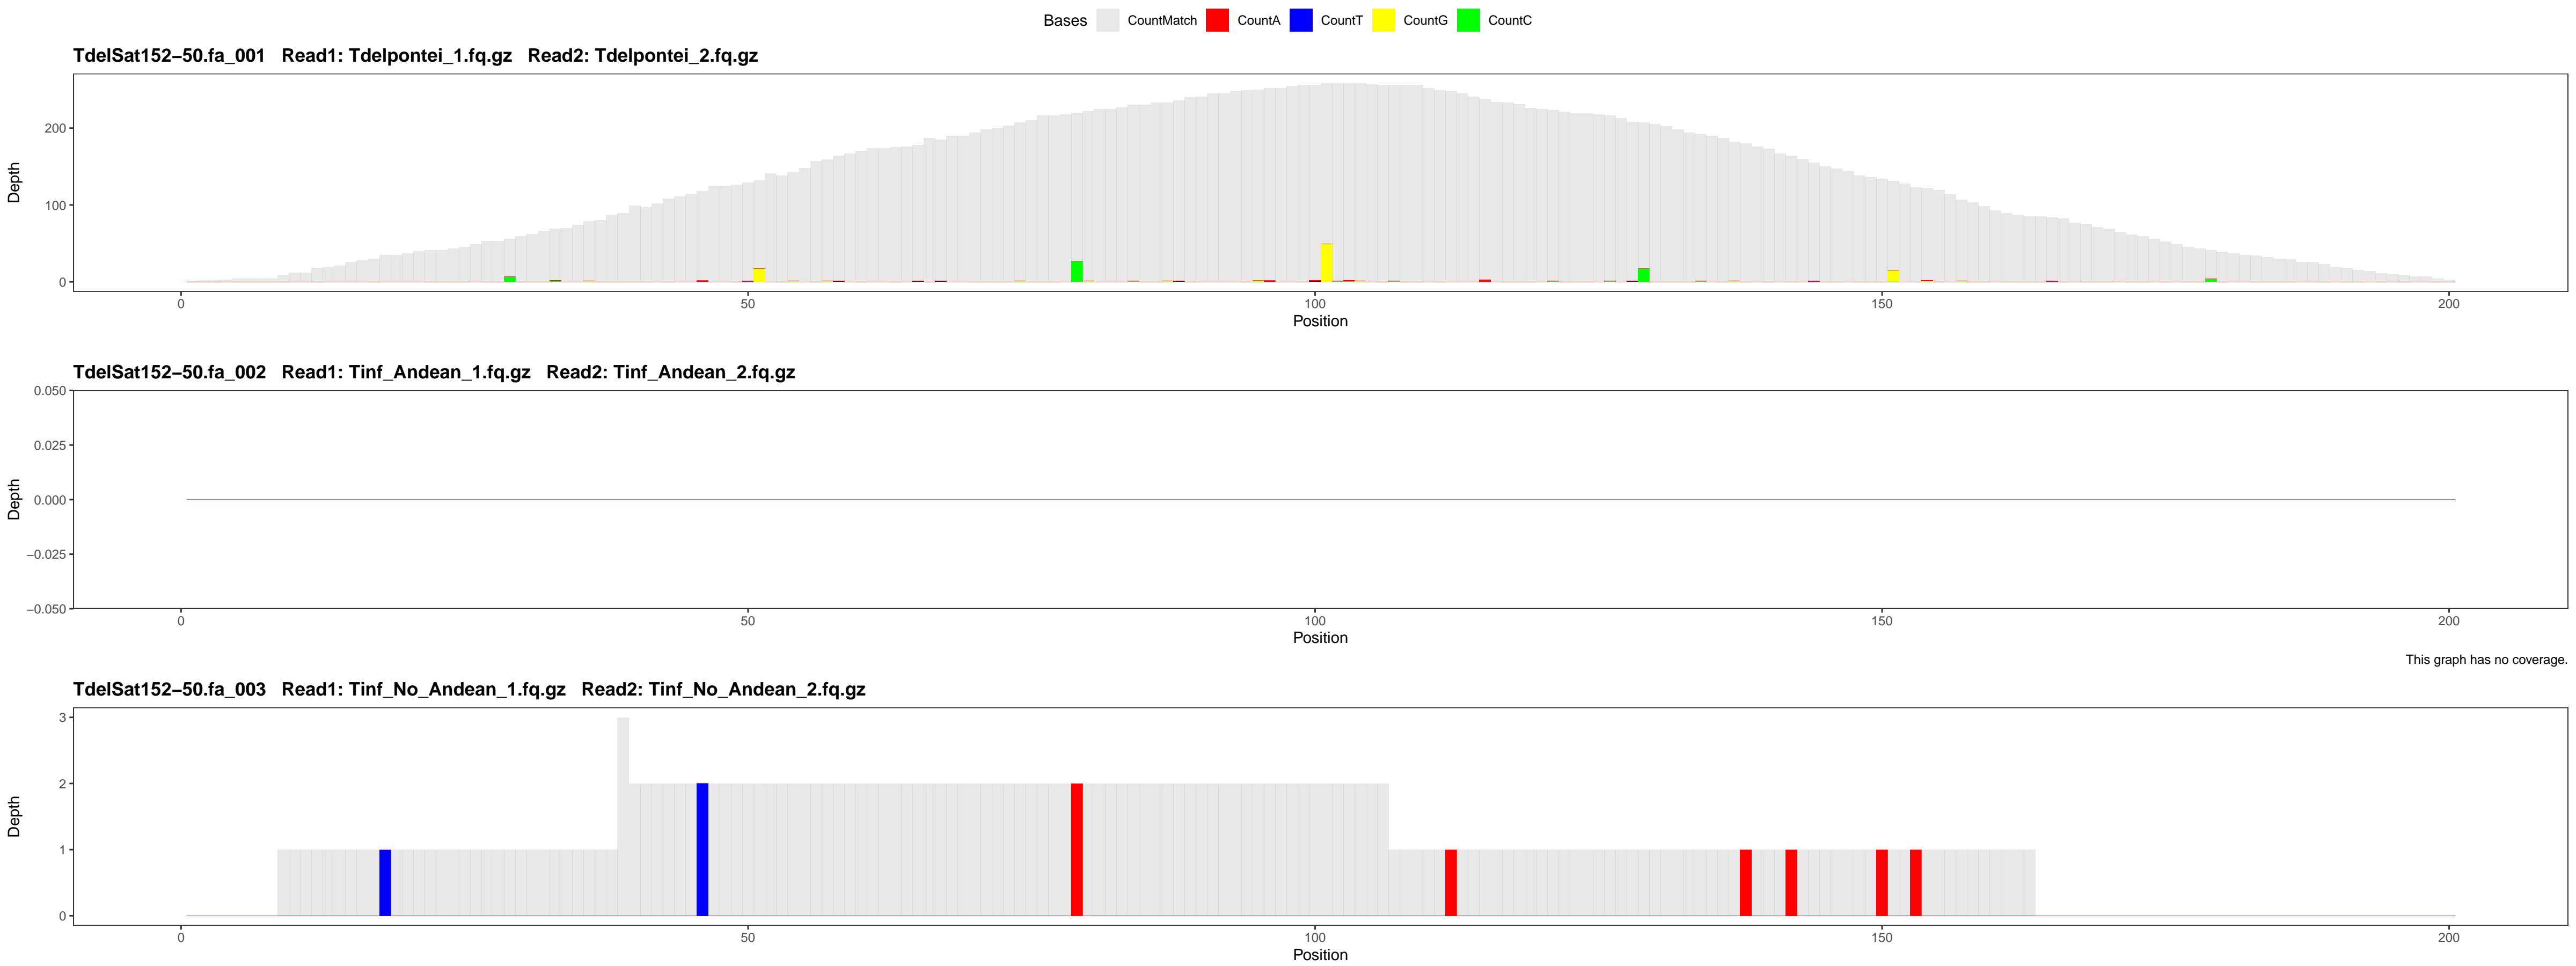

This graph has no coverage.

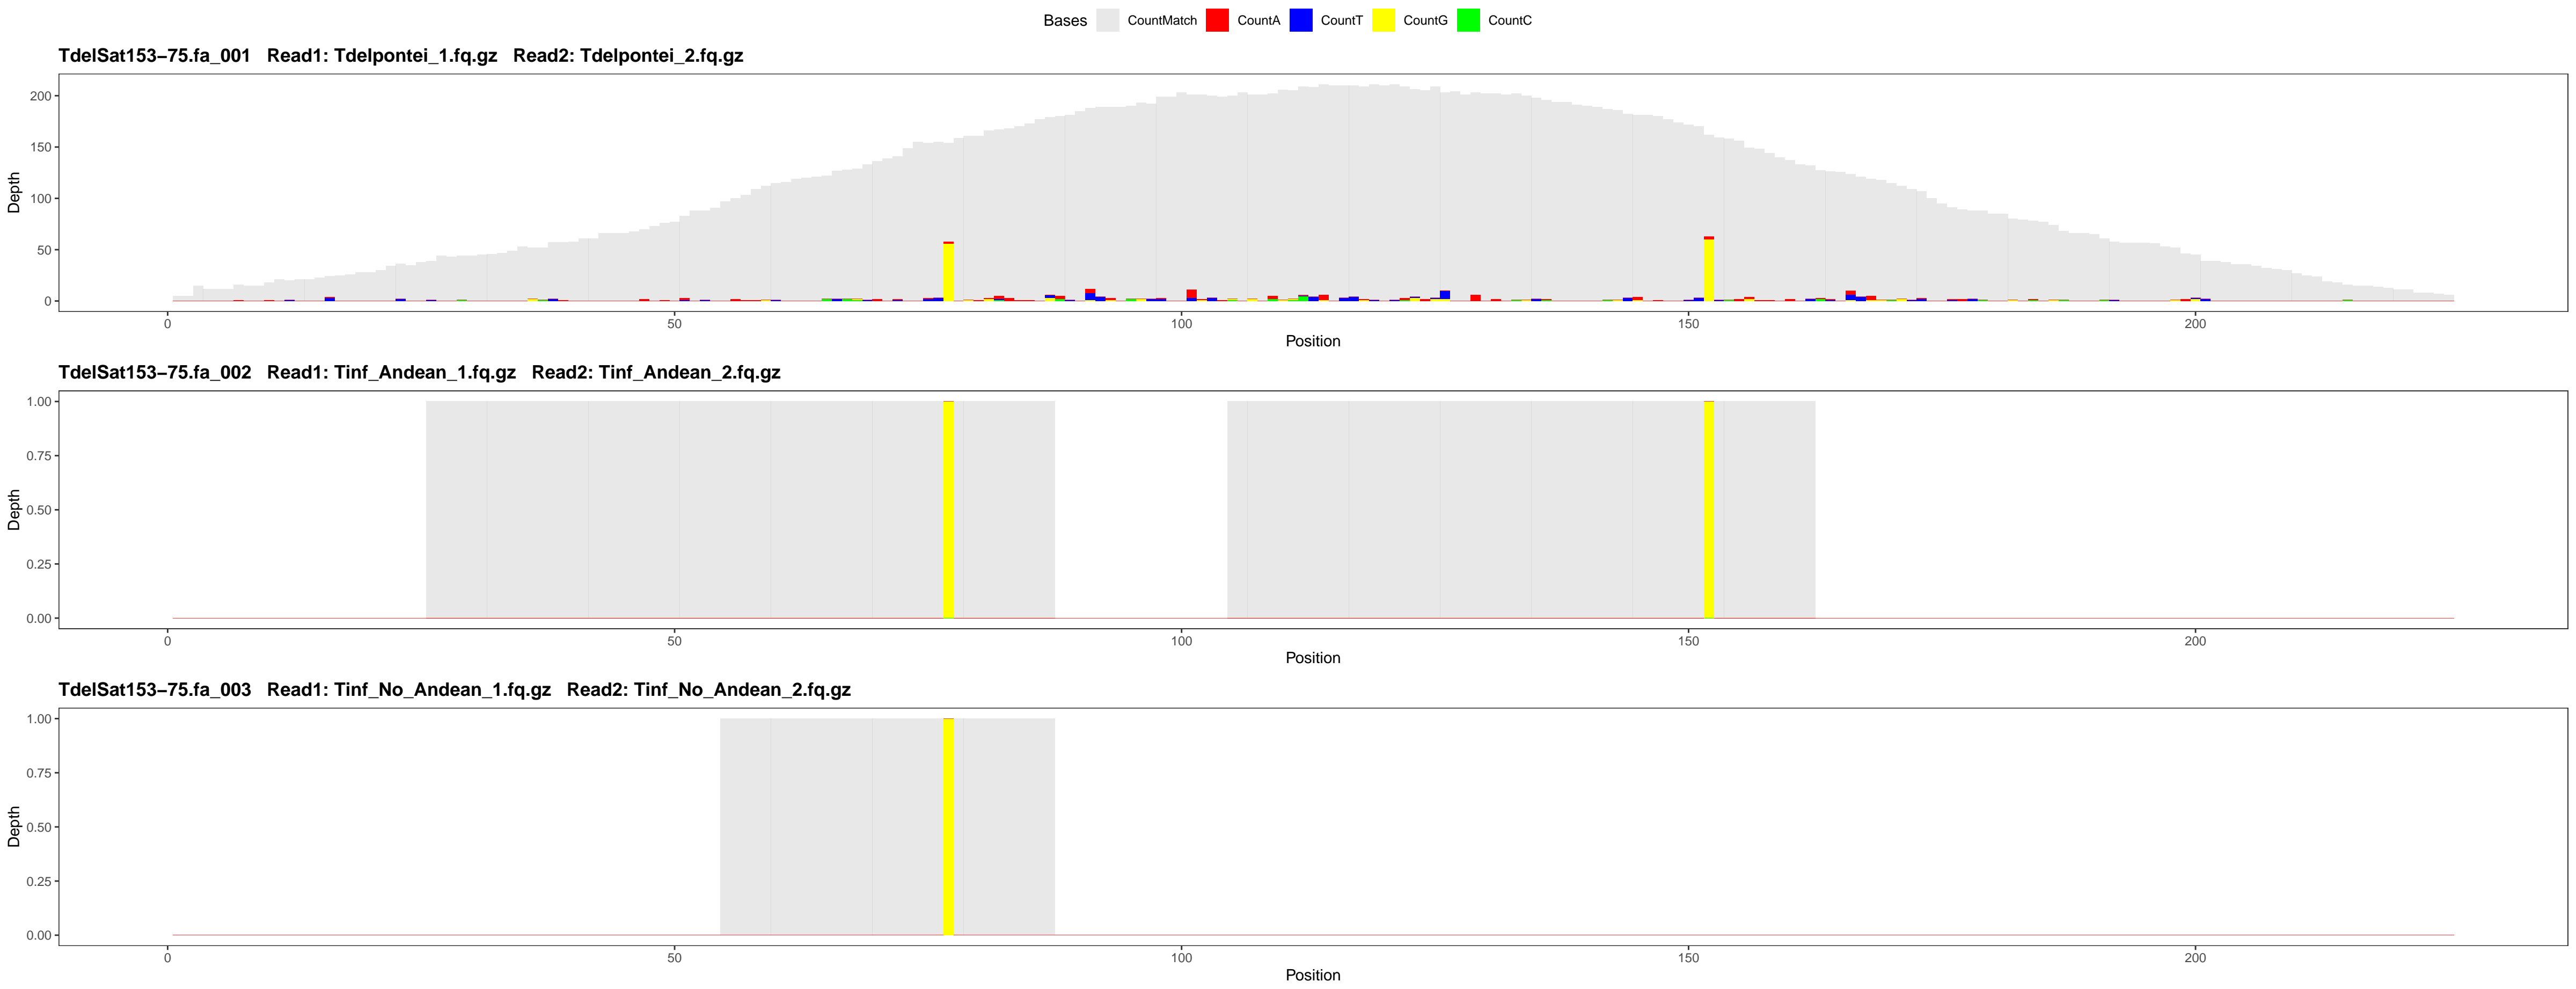

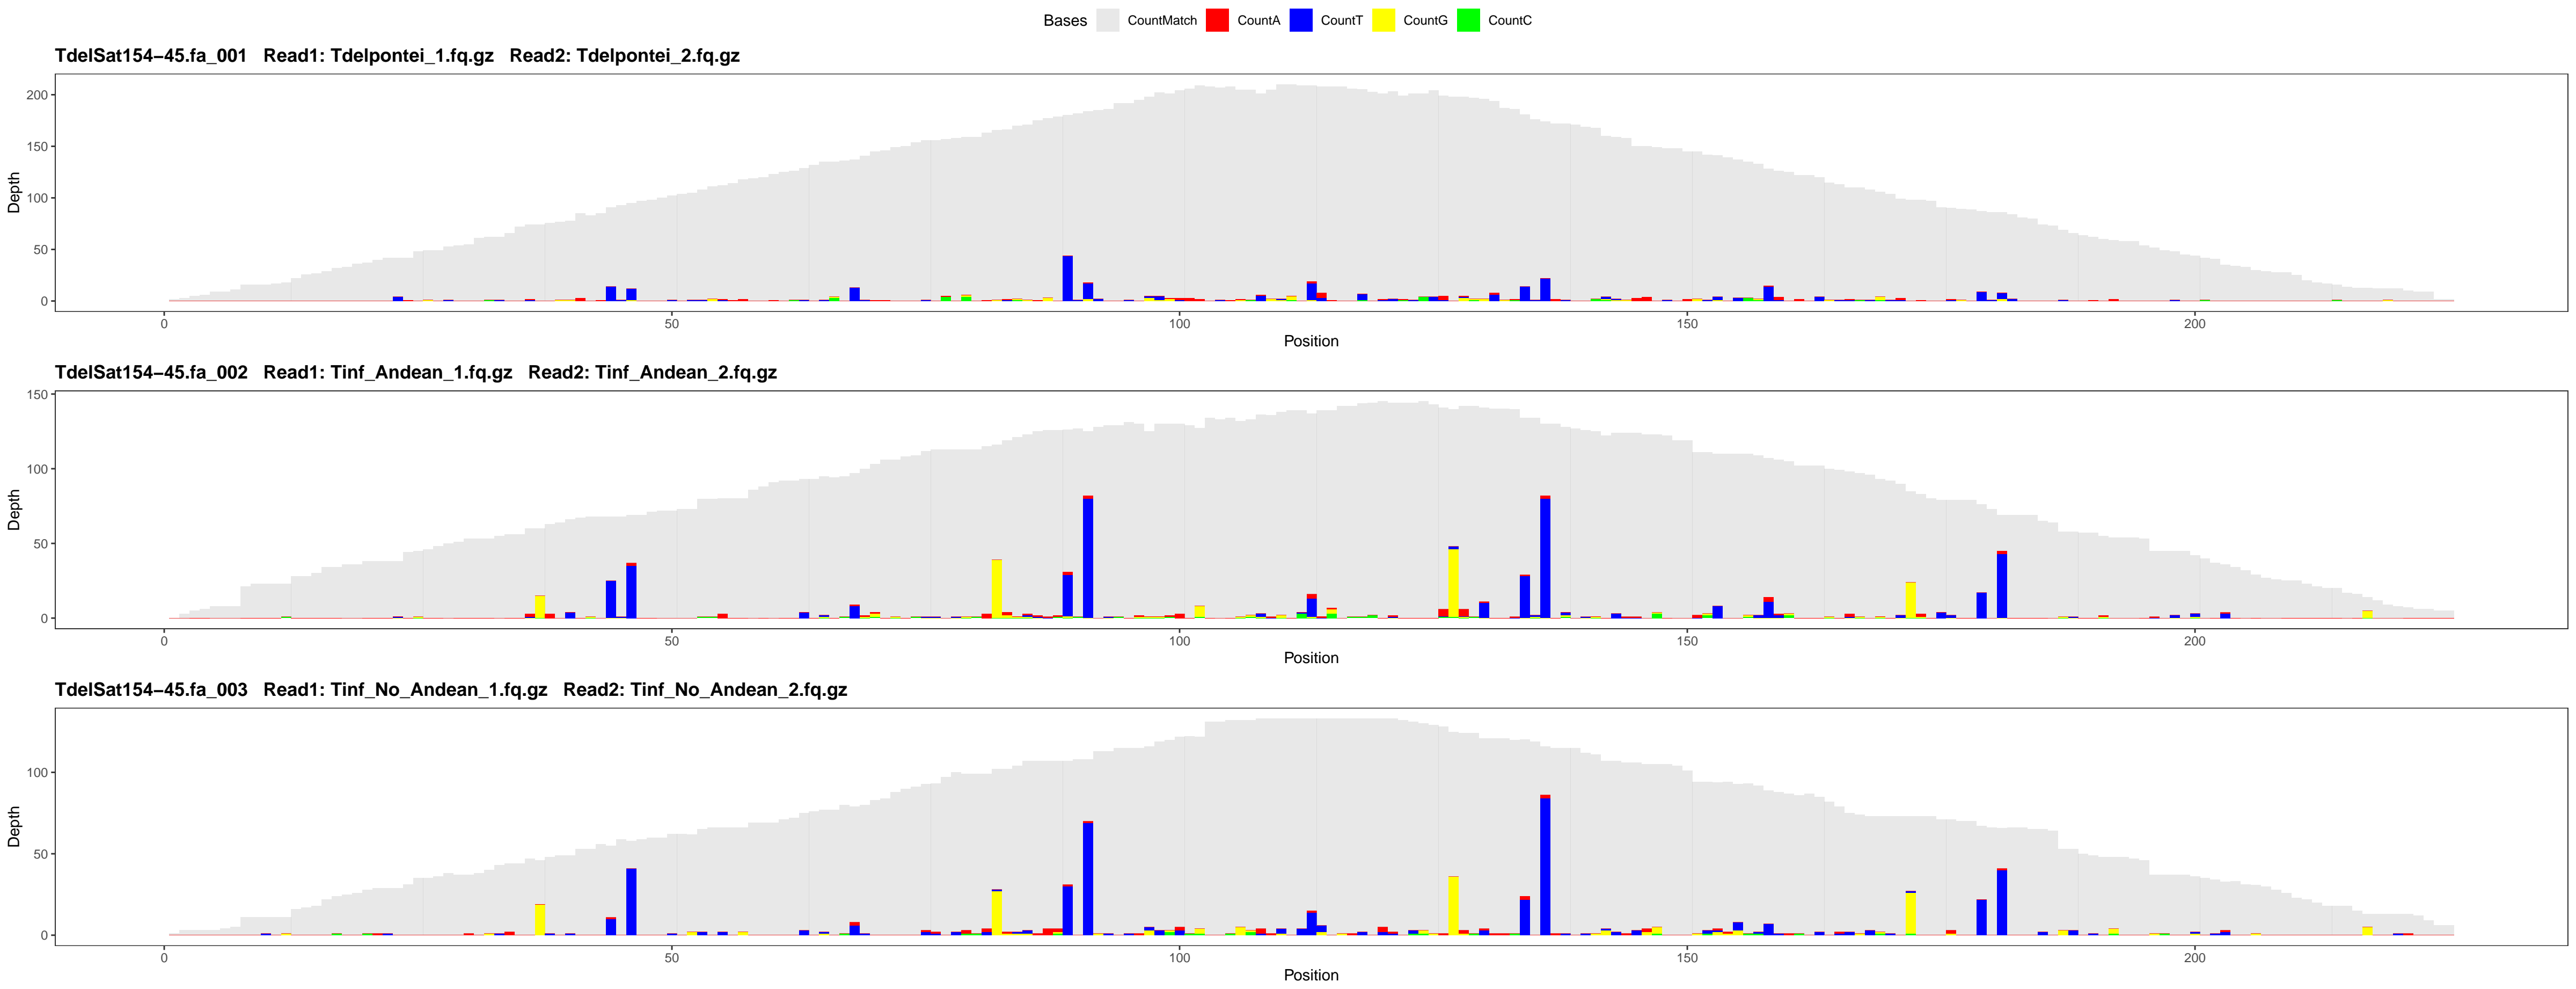

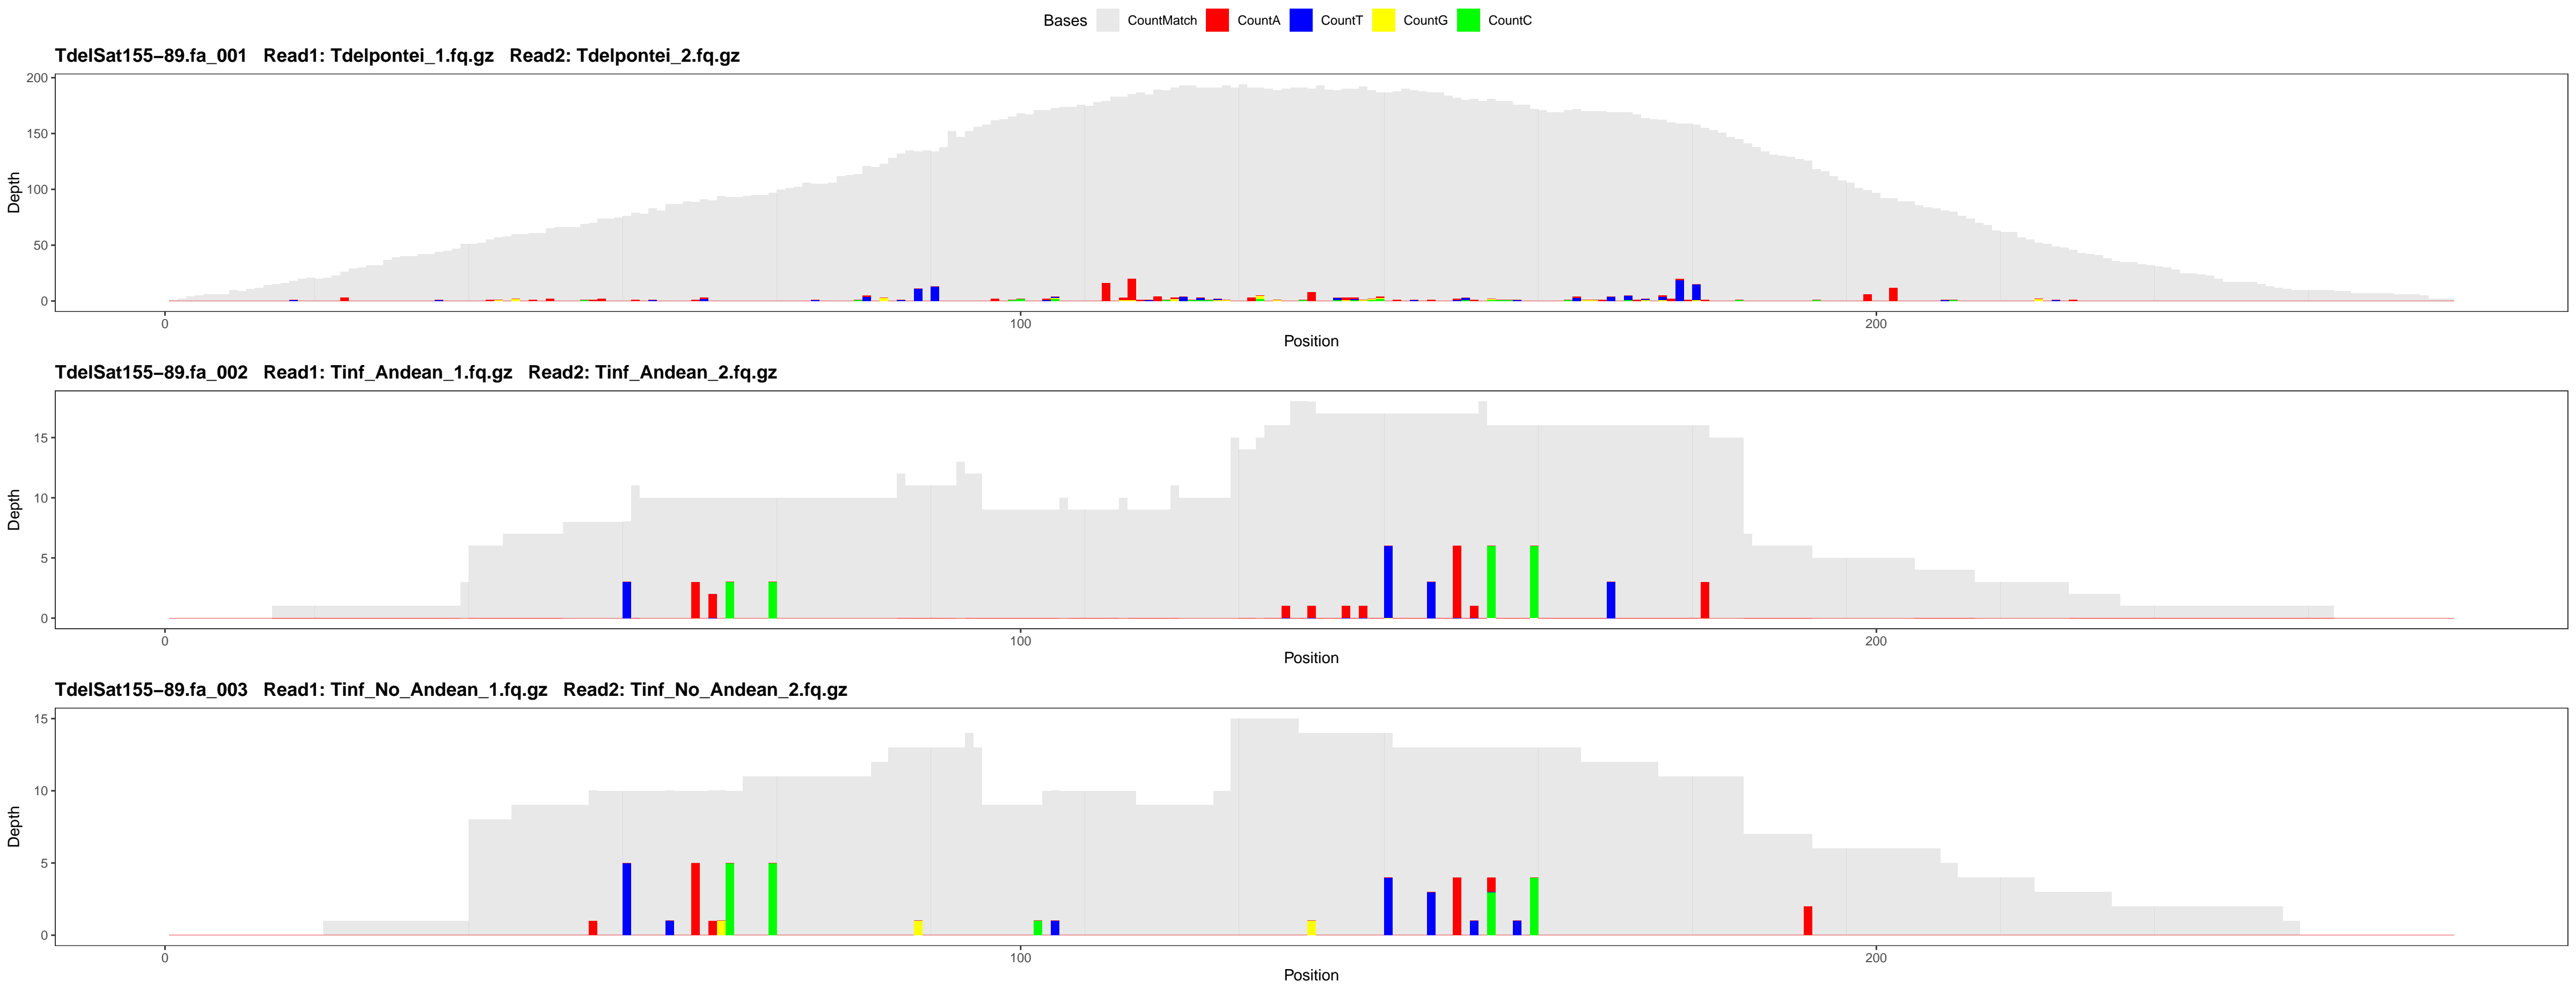

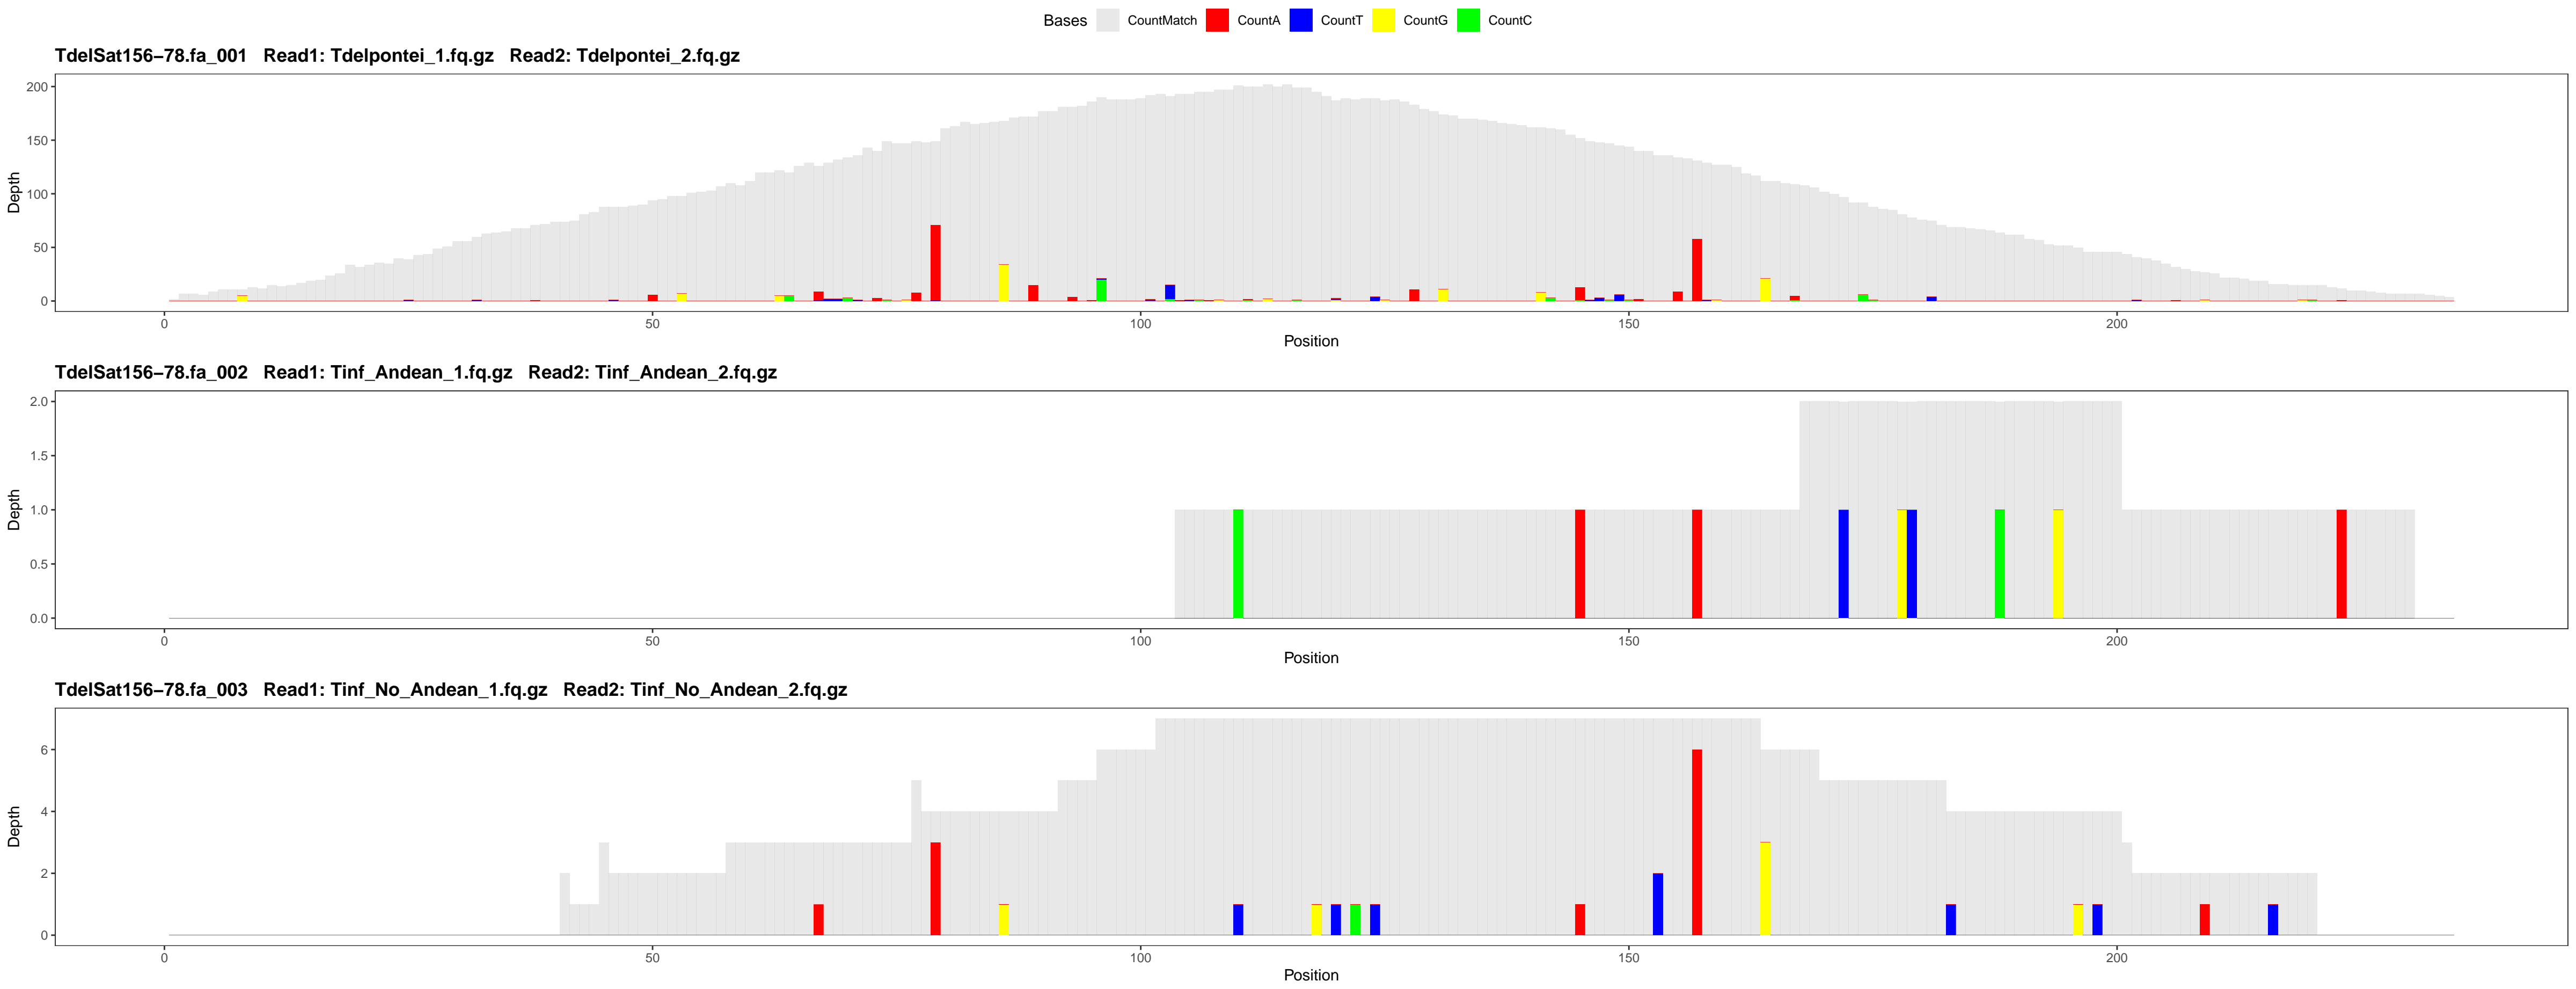

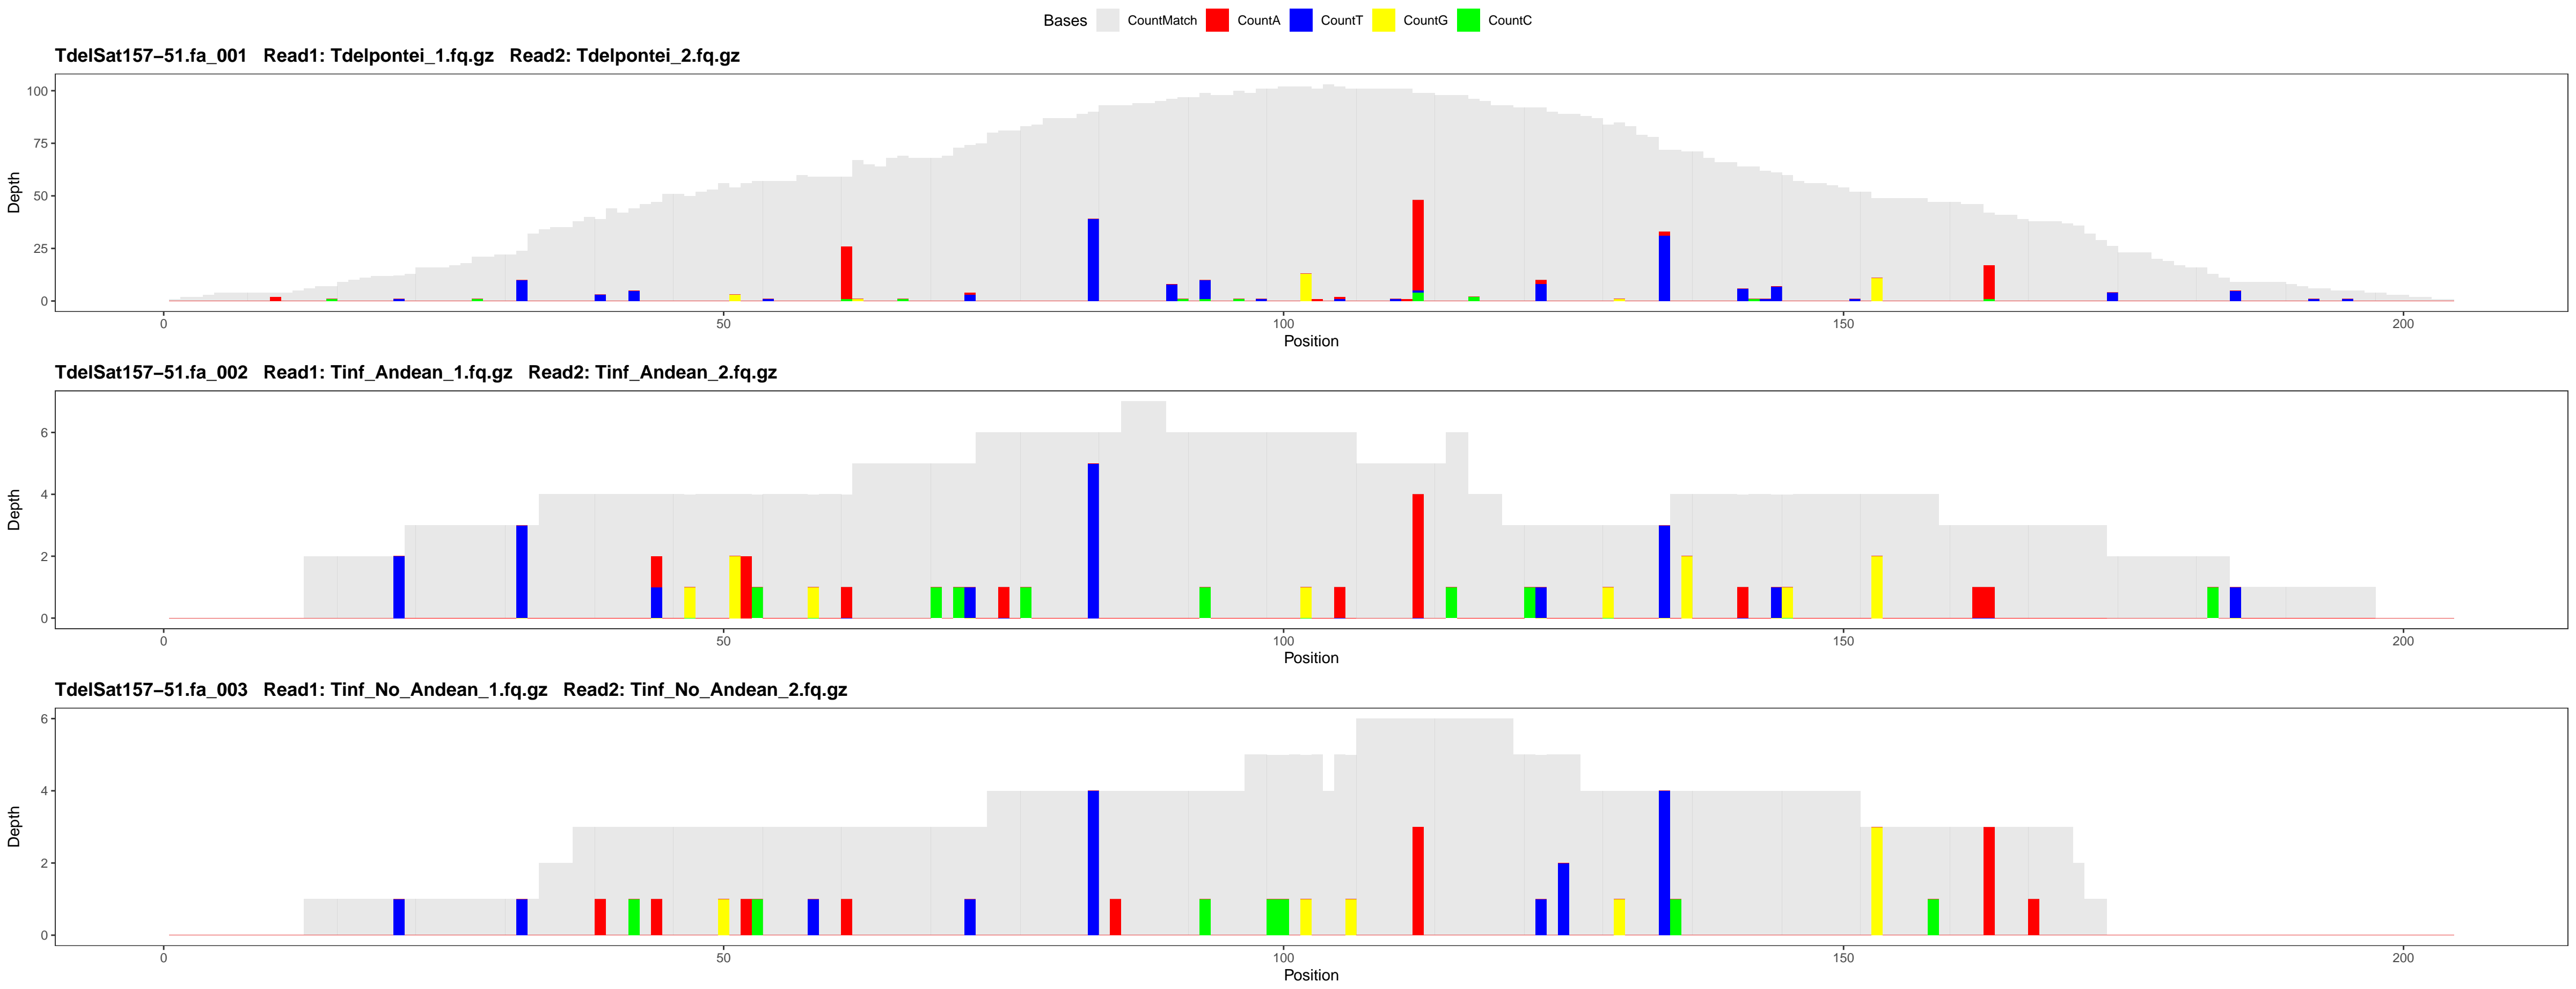

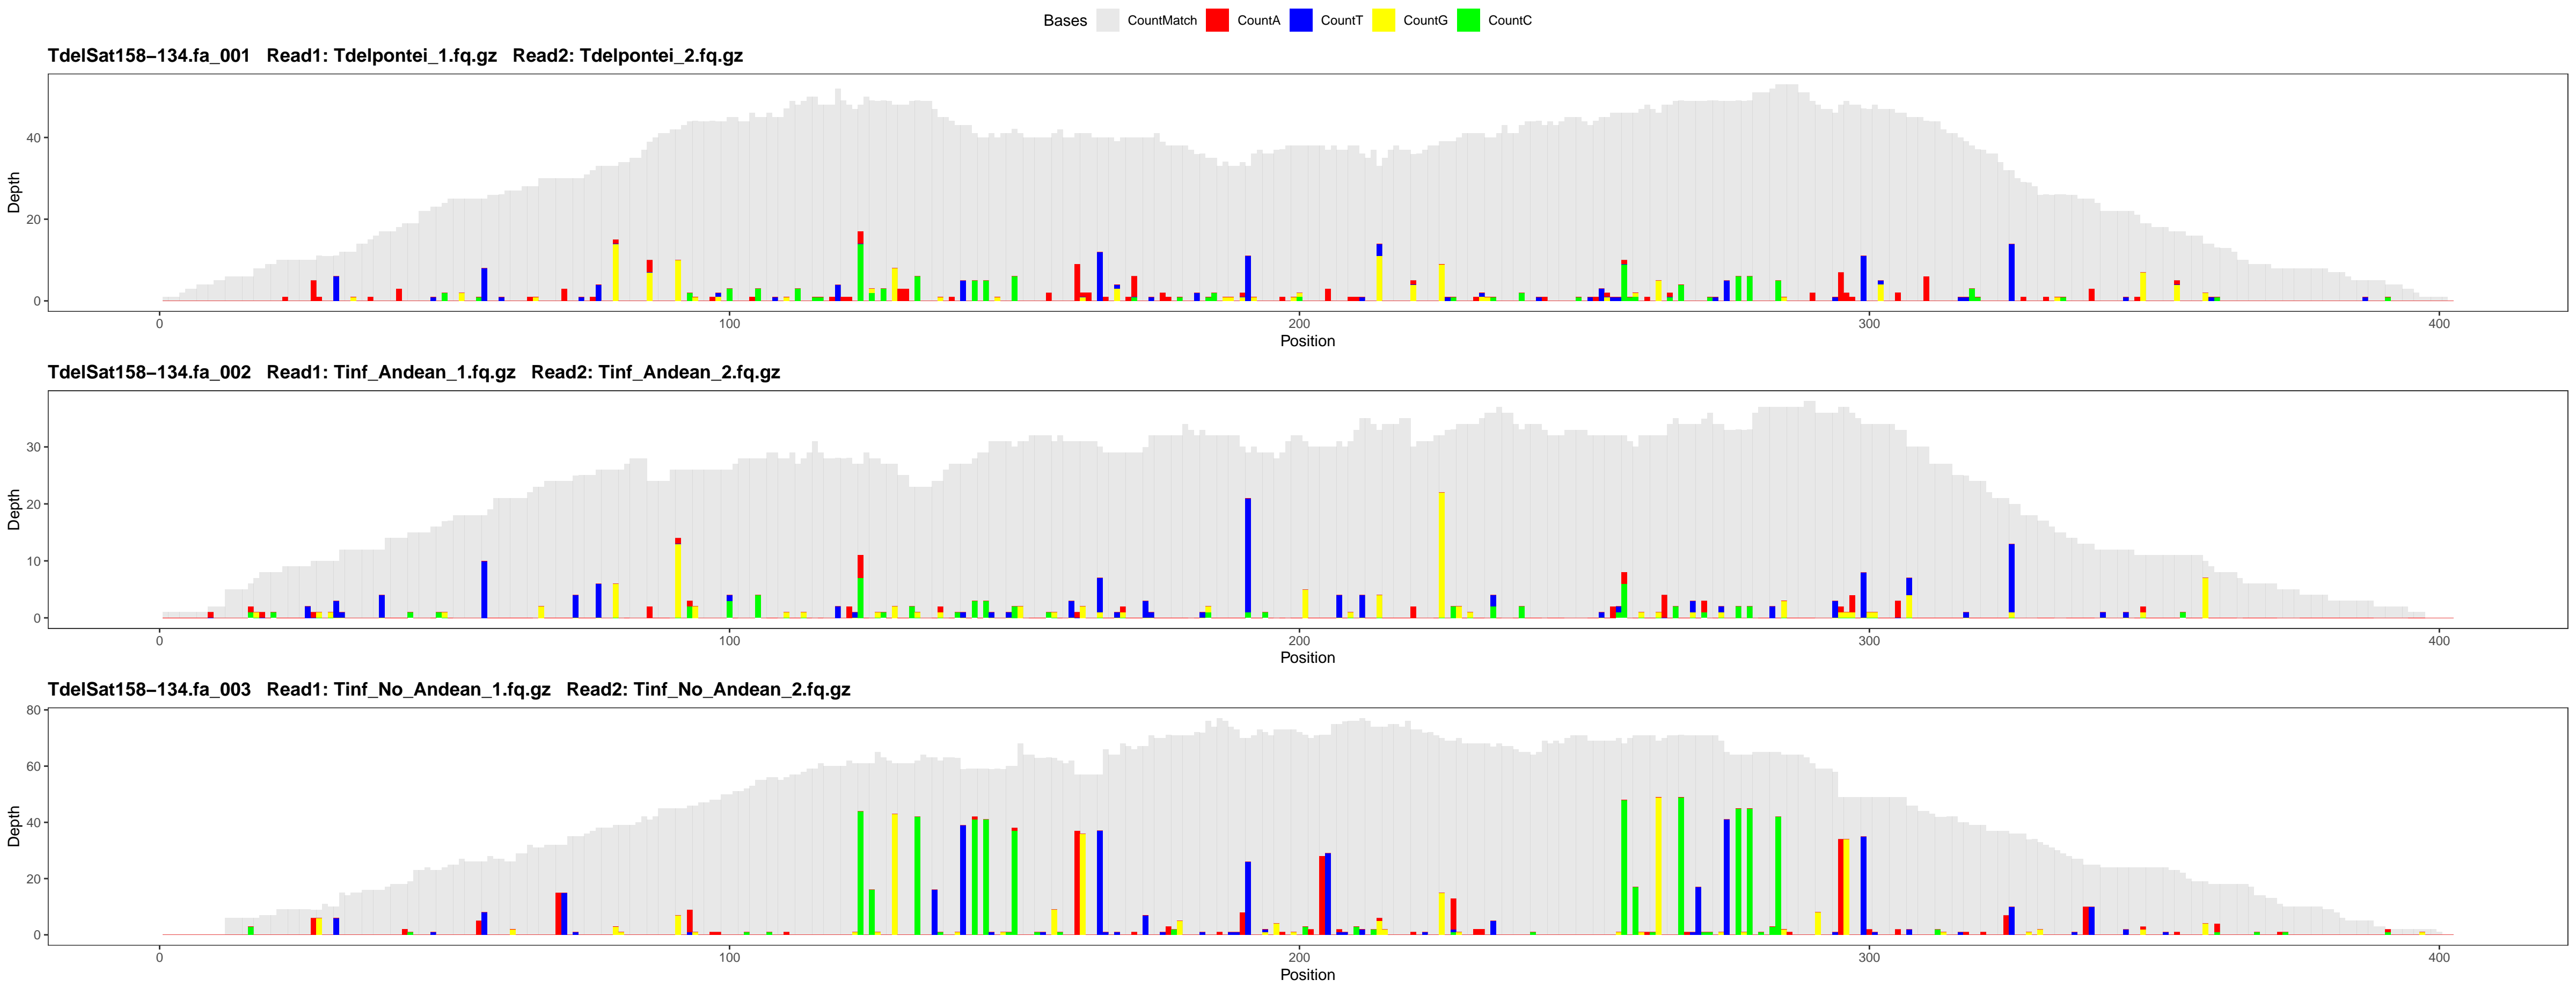



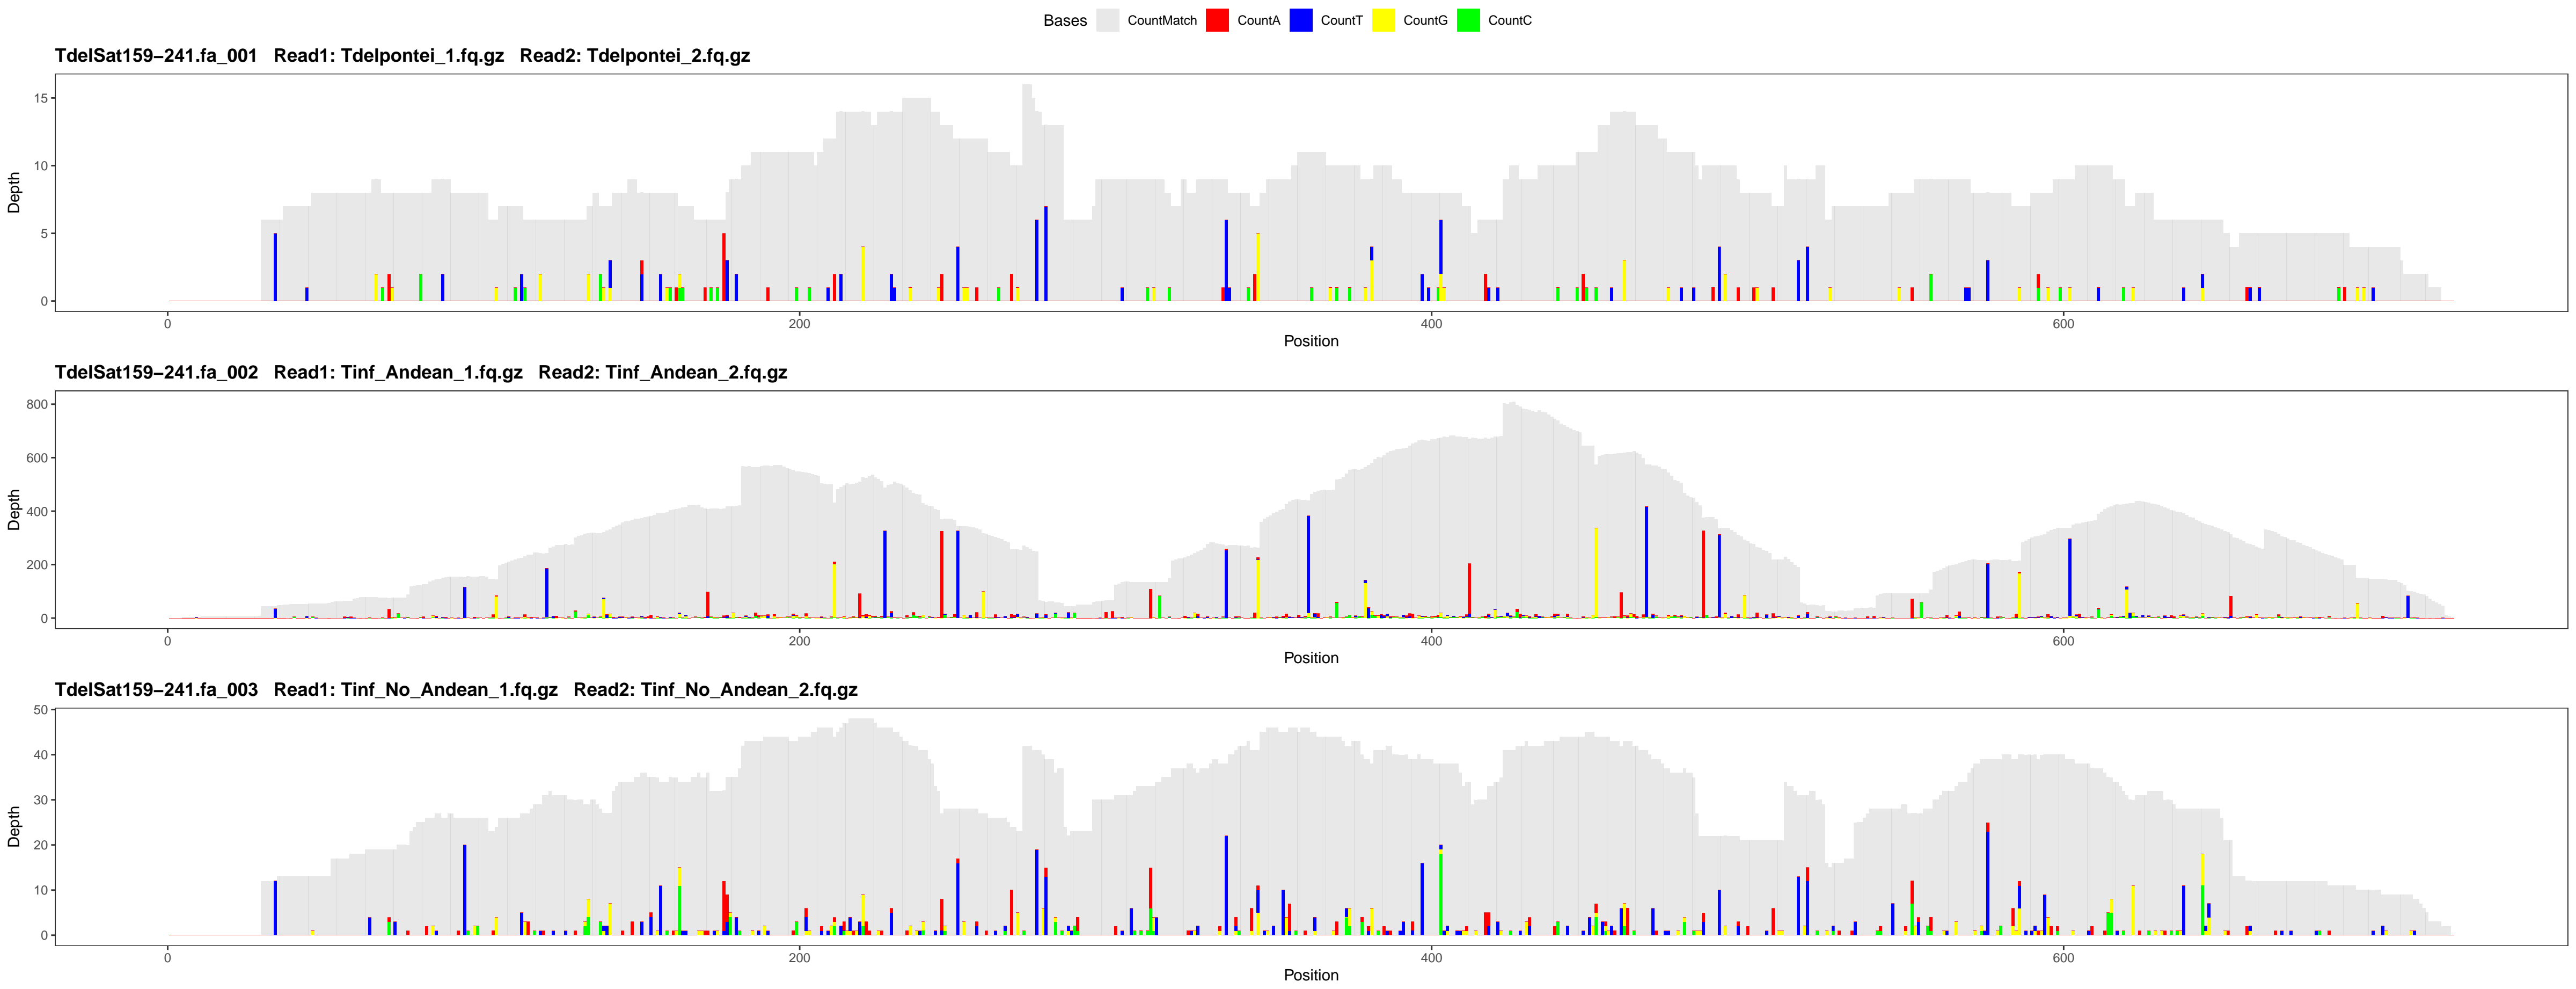

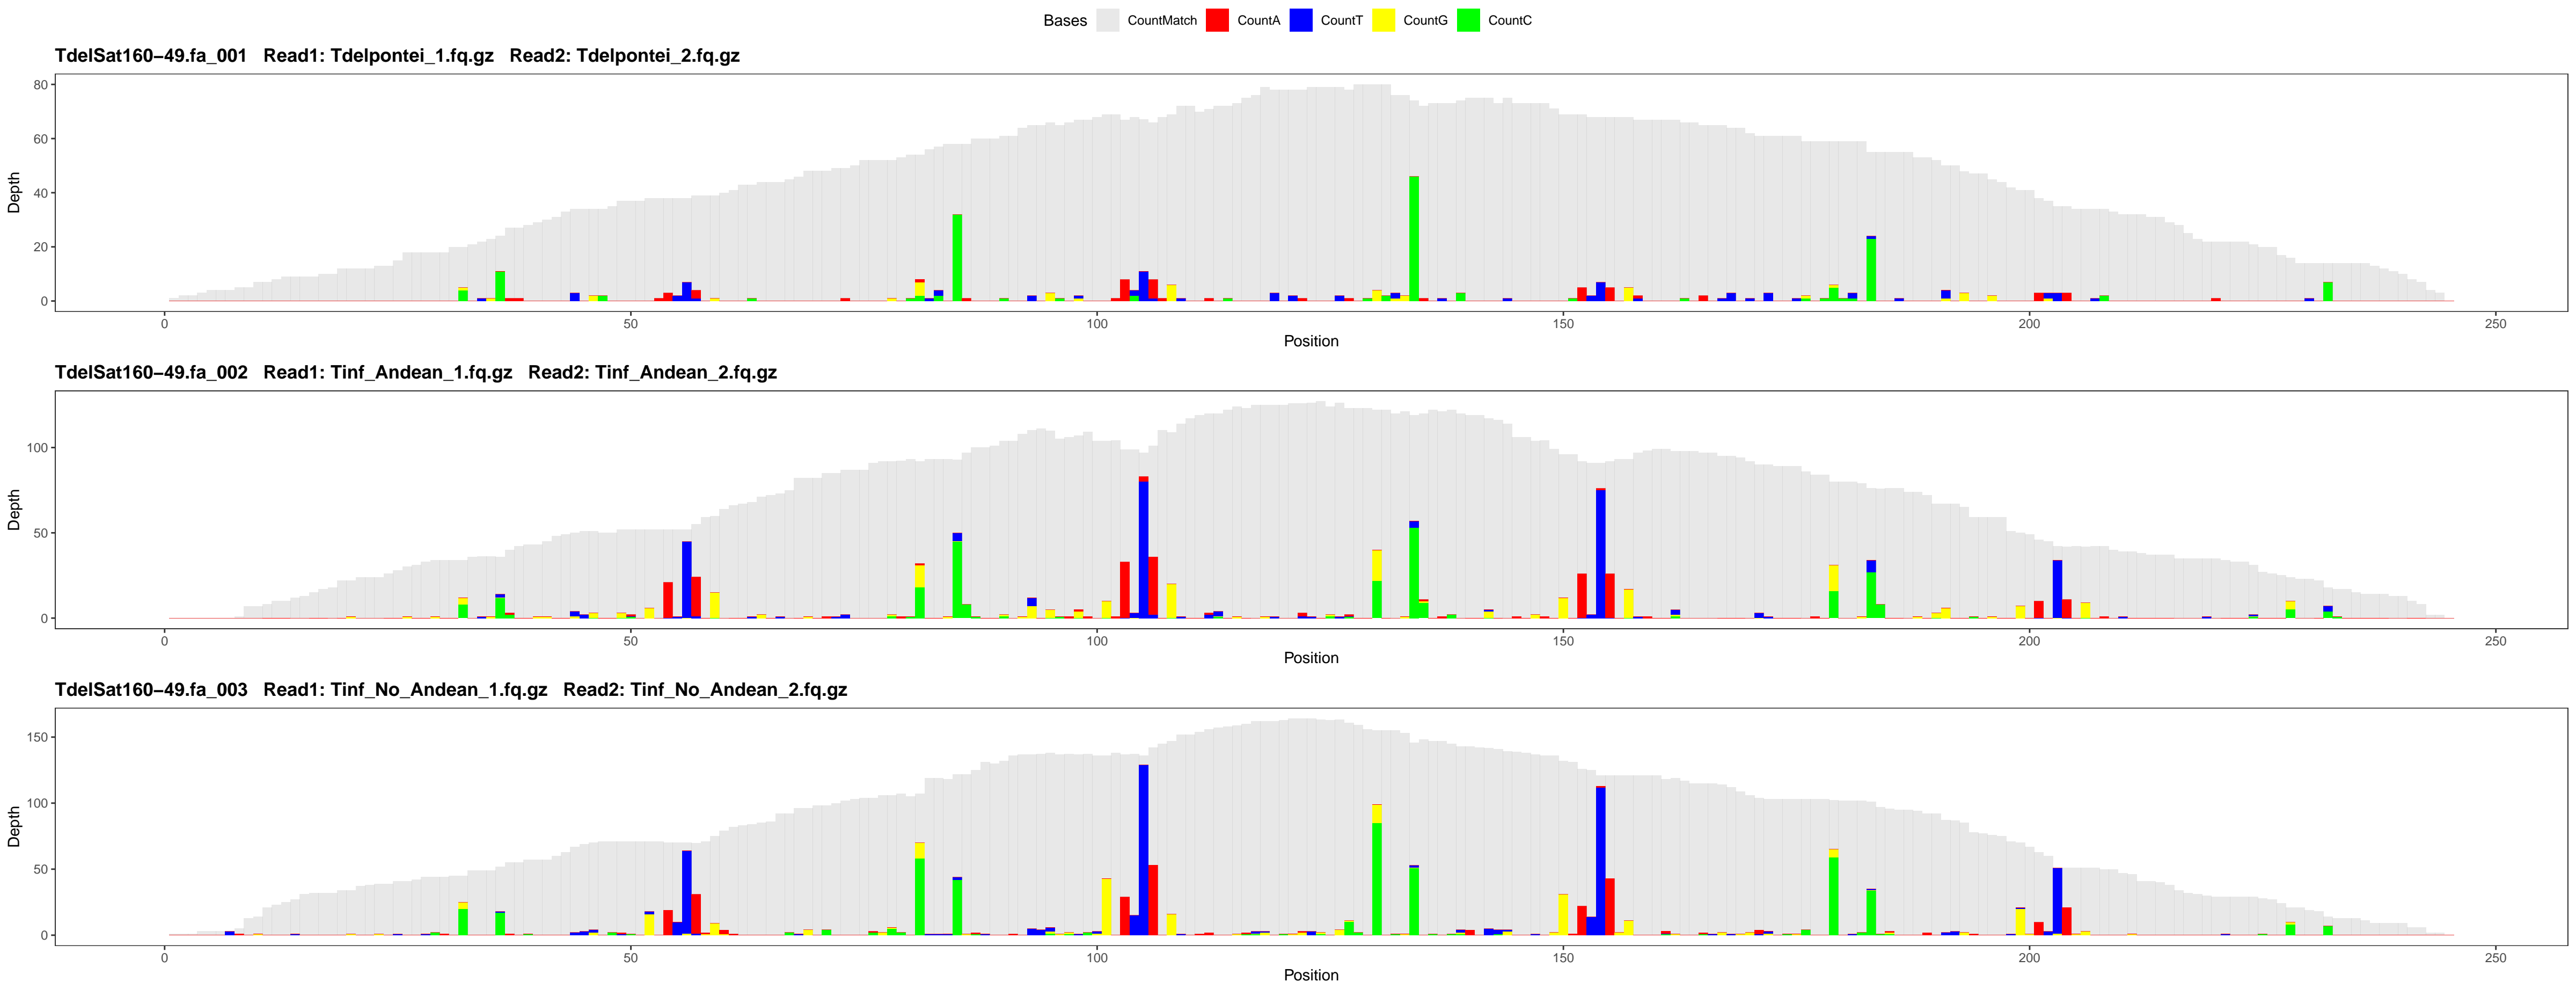

Supplement: s1 [file s1]
