# Supplementary material for: Making the Genome Huge: The Case of Triatoma delpontei, a Triatominae Species with More than 50% of Its Genome Full of Satellite DNA
Source: MDPI journal article supplement (doi:10.3390/genes14020371), 2023-01-31
Supplement: s1 [file s1]

**Supplementary Table S1.** Data of the satDNA families found in *Triatoma delponte*: genome abundances (%), divergences, A+T contents, accession numbers and consensus sequences.

| Name                        | Genome abundance (%) | Divergence | A+T  | Accession number | Consensus sequence                                                                                                                                                                                                                                                                                                                                                                                                                                                                                                                                                                                                                                                                                                                                                                                                                                                                                                                                                                                                                                                                                                             |
|-----------------------------|----------------------|------------|------|------------------|--------------------------------------------------------------------------------------------------------------------------------------------------------------------------------------------------------------------------------------------------------------------------------------------------------------------------------------------------------------------------------------------------------------------------------------------------------------------------------------------------------------------------------------------------------------------------------------------------------------------------------------------------------------------------------------------------------------------------------------------------------------------------------------------------------------------------------------------------------------------------------------------------------------------------------------------------------------------------------------------------------------------------------------------------------------------------------------------------------------------------------|
| TdelSat01-79                | 18.158               | 12.73      | 0.59 | OQ082080         | >TdelSat01-79<br>CCCTAAAATCGGCGTTTCAAACGTAAGAGTGAGTTTTTCGAGCAACACTCACTTCA<br>GTTGGTTGTAAGGTTCAAGAAAAT                                                                                                                                                                                                                                                                                                                                                                                                                                                                                                                                                                                                                                                                                                                                                                                                                                                                                                                                                                                                                          |
| TdelSat02-8 (GATA-GATAGTTA) | 14.21                | 10.37      | 0.75 |                  | >TdelSat02-8<br>GATAGTTA                                                                                                                                                                                                                                                                                                                                                                                                                                                                                                                                                                                                                                                                                                                                                                                                                                                                                                                                                                                                                                                                                                       |
| TdelSat03-10                | 12.786               | 6.73       | 0.50 | OQ082081         | >TdelSat03-10<br>RCATACTCGK                                                                                                                                                                                                                                                                                                                                                                                                                                                                                                                                                                                                                                                                                                                                                                                                                                                                                                                                                                                                                                                                                                    |
| TdelSat04-53                | 3.146                | 6.59       | 0.58 | OQ082082         | >TdelSat04-53<br>AACGGTTTTGGTTATACTATTTTTCCAAACCCGCAATACACGTTTGCCCTTC                                                                                                                                                                                                                                                                                                                                                                                                                                                                                                                                                                                                                                                                                                                                                                                                                                                                                                                                                                                                                                                          |
| TdelSat05-1000              | 2.502                | 12.99      | 0.67 | OQ082083         | >TdelSat05-1000<br>ATCGTCGGAGCCATTTTTGAGAAAATCGCAAAAAAGTAAAAAAAAAACAAGT<br>AAAGTGGTACTTCCGGTTGAGGAATTTGACAGATAACGTACTGTCAGATCCCAT<br>GGTGATACCTAAACGGAATATCAAGTTTCACTTTCTACGGTTTTTCGTTTTGAGC<br>TATGCTGTTACATACATACATACACACACACACACACACACACCATTTGCTAAAAA<br>CCACTTTTTTGGACTCAGGGGACCTCAAAACGGATATTTCCGGTGAAAACTCGAT<br>ATCGAAAATTTGACACGATTACAATACTTCCTCTTACTAGGAGTAAGAGAAAAGTA<br>AAAAAAAAAAAAATCTGGTGTGAAACACTCACACAACCTTCTCTTACTCCAGTTCTC<br>AAAATTATAATTGACAAATTTTATAGTTTGTGTACCAAATTTAATGAAATTCGTCG<br>AAAAGTAAAAAACTGTTTCAGTAAAAGCGCACTTCCGGTTTACTAATTTTCTTG<br>AAACTCGGAATTTTGGCCATCTATTTATTCTAATTAATTTGTTTGGATGATAGAA<br>TTGTATAATCAACTATGATAGCACTTTAGAGAAAAACATAACCCACCCCTCCCC<br>TAAAAGTGCCCTTAAATGAATTTCCAGAGAAATGTTTTAAATAAAAGTTGTAG<br>ATCTTTGTATGTGTAGTTTATATACGAAGTTTCAAGAAAATCGTCGGAGCCATTTT<br>TGAGAAAATCGCGAAAAAGTGAAGAAAATCATTTAGTAAAGTGGTAAAGTAAAC<br>GCACTTCGGTTATCCGATTTTTTTCAAACCTCGGAATTTCAACAACATATTTAATT<br>TAATTAACATTATTTAGATGACAGAATTGTCTAATAAACTGAAATAGCACTTTAG<br>ATGAAAACCTAACCCACCCCTCCCCAAAAGTGCCCTTAAATGAATTTCCCGG<br>AGAAATGTTTCAAATAAAAGTTGTAGCTCTTTGTATGTGTAGTTGATATACCAAGT<br>TTAAAGAAA |
| TdelSat06-25                | 0.437                | 13.14      | 0.76 | OQ082084         | >TdelSat06-25<br>AGAATGTATAACTTTGACAAATGTT                                                                                                                                                                                                                                                                                                                                                                                                                                                                                                                                                                                                                                                                                                                                                                                                                                                                                                                                                                                                                                                                                     |

|                  |       |       |      |          |                                                                                                                                                                                                                                                                                                                                                                                      |
|------------------|-------|-------|------|----------|--------------------------------------------------------------------------------------------------------------------------------------------------------------------------------------------------------------------------------------------------------------------------------------------------------------------------------------------------------------------------------------|
| TdelSat07-334    | 0.410 | 4.61  | 0.70 | OQ082085 | >TdelSat07-334<br>TAAACAGGCATAGGATATTATGCGCTAAAAAACATGTTACTTTTTAATCAAAGAA<br>TATTGGAACAAGTTAAACCATTATAAGTTTCTAATCTGGGGAAATGATTGCATTAT<br>ATCCAAATTCGAAATCTTCTGTTTTGTAGCCATTGTCTAACGTCTATTAGTCCAAG<br>AAAAACACAGATATACAATAGAATATAAACATATATTGCACATAAACATTCTTAA<br>GTTATCGCATGGCAATTATTGTGGATTGCAATAACAGTTTTGTCTAGTAATTTCCAA<br>GTTCTTTCTCAACCTTTCTAAATATGTAACAACCTTCTCTGCCATCTTACATTCT |
| TdelSat08-247    | 0.303 | 12.21 | 0.49 | OQ082086 | >TdelSat08-247<br>GGCGCGTCAACATCTATGGTCATTGGCGCCCGGAGCCTTCTCAGTGCACTGCCGG<br>CCTCCGGACAGTGTTCTCTCGTTACAGACAACACTGTCCATCACCGGACAGTGAG<br>CTGTAGAGGCTCCTAGGAAGAGAAAAATCTAAGGGTAGCACAGCTGGACTCGAAC<br>CCGGGACCTCCGCGTGGGAGTCCAGTACGCTAACCACTTAGCTATTCCCTTCCCTT<br>TATTATTATTATTATTTTAAATTTAA                                                                                            |
| TdelSat09-181    | 0.173 | 11.32 | 0.77 | OQ082087 | >TdelSat09-181<br>CGGCTCAAAAAACAATATTAAAGTCCTTAGAATGTTTTAGCTAAAAATATTATAAGT<br>GTAAACATAATTTAAATATACATAAAAAAAAACAAAGTCTTTGTTTCATAGTATTG<br>GATGATAATATATTTAATGTTTCTAGCTAAATATTATAAAATATTAGCCCTAGTCTT<br>GTATGTCATCTCA                                                                                                                                                                |
| TdelSat10-315    | 0.117 | 2.97  | 0.45 | OQ082088 | >TdelSat10-315<br>GCAGATATATGGCTAGCCAGAGTGGTAGTGGGCTGAAAGCCCGCTTAAAACTGG<br>CTGATTGGGCAACTGAGATTCAATCTGCTGACTATGCCATCACTGCCGGGGCGGC<br>GGTGTGCGAGAAATCGGCGATTAAGGTCGATAACGCCACCTATACGGCAGGTAA<br>TGACATGACCATTAGTGTGACGCTGAAGGATGCGCAGGGTAATGGGGTTACTGGC<br>CAAGCTGCTGCCTTAACGTCCCAGGCGGTAAACGGTGGCCAATGCCAGTGAGAAAT<br>CCGGTGTCACGTGGATCGATAACGGCGACGGCACCTATAGCC                   |
| TdelSat11-239    | 0.092 | 12.63 | 0.60 | OQ082089 | >TdelSat11-239<br>ACCCGCGCGCACCTATTCTAAAAATTAAATTCTCTGAAATAAAAAGTAAAAGTAAA<br>GAATGCCTATTTTTTCAGGCTGACGTAACATTCAACTAACAAATTAGGTATCGTGGA<br>CGGGGGCAGAACTCCTACTTCACTATTAACATTTTTCCATACCAATATAAAATTT<br>AGCAACTATACGCGGGACTCGAACTGGGGACCTCCCGCGTTTCGAGTCCATGCTCA<br>CAACCACTAATGAATTAA                                                                                                 |
| TdelSat12-52     | 0.086 | 4.2   | 0.62 | OQ082090 | >TdelSat12-52<br>ATATAAATCTGATGTGTAATCACACGACTTTCTCTTAGTGCTGTAGGAGGTG                                                                                                                                                                                                                                                                                                                |
| TdelSat13-4 CATA | 0.056 | 2.13  | 0.75 |          | >TdelSat13-4<br>CATA                                                                                                                                                                                                                                                                                                                                                                 |
| TdelSat14-94     | 0.053 | 6.3   | 0.73 | OQ082091 | >TdelSat14-94<br>CGGAAAATGTCTCTGATAAAGAATATTATGAATGTAAAGAATGTAAAGAATATTA<br>GAATAAAGAATGTAAAAAACAAAATGAAGCAGGCTACCA                                                                                                                                                                                                                                                                  |

|               |       |       |      |          |                                                                                                                                                                              |
|---------------|-------|-------|------|----------|------------------------------------------------------------------------------------------------------------------------------------------------------------------------------|
| TdelSat15-93  | 0.053 | 4.56  | 0.61 | OQ082092 | >TdelSat15-93<br>AGAGTGTGTGGTTTCCTCAACAAATCCATTTTATTAAGTTTAGATTCTCTCCAATG<br>ACACACAATGTAAACAAGTACACATTAGGGGAGAGGG                                                           |
| TdelSat16-31  | 0.053 | 1.07  | 0.65 | OQ082093 | >TdelSat16-31<br>ATATACGGTCAGTTTGGTCACAGTTATTACT                                                                                                                             |
| TdelSat17-84  | 0.045 | 18.73 | 0.64 | OQ082094 | >TdelSat17-84<br>AAAAGACATATGCGAACACATACAGGCGAGAAGCCATATAAATGTAGTGAATGC<br>GATTACAGTTGTACAACAACCTGGAAATTTA                                                                   |
| TdelSat18-62  | 0.040 | 9.18  | 0.58 | OQ082095 | >TdelSat18-62<br>TTTTCTGCGATTTTCTCCATAACGGTGGACTAGAAGTGCTACTTCACTGGTGAAGT<br>TCTTTG                                                                                          |
| TdelSat19-58  | 0.040 | 6.26  | 0.66 | OQ082096 | >TdelSat19-58<br>TAATCTGAGTTGGAACATCCATTGTAGTGAACCACATATTTGTTACTATCAGCGT<br>AT                                                                                               |
| TdelSat20-27  | 0.035 | 10.77 | 0.74 | OQ082097 | >TdelSat20-27<br>CGCATTTCCTTTATCAAACCTTAATAA                                                                                                                                 |
| TdelSat21-33  | 0.034 | 7.16  | 0.70 | OQ082098 | >TdelSat21-33<br>TCTACACACATAAATACCTATCACTGTATACTA                                                                                                                           |
| TdelSat22-104 | 0.033 | 6.45  | 0.63 | OQ082099 | >TdelSat22-104<br>GCTTAGTCAGTTCAATTATACATTTAGTTGGCTGAATGGTGAGCAACCTAATGTTT<br>GTATTTATTAGCGAGAATGTGATGATAGGTTAGAGTGTGCTTGATGG                                                |
| TdelSat23-112 | 0.031 | 7.68  | 0.63 | OQ082100 | >TdelSat23-112<br>GAACCCACGGTGATATCTAAACAGAATGTCAAGTTTGAATTTTCTGCGATTTTGT<br>TTTTGTTGTGGTTGTGTTTGTTCGGTTGTGGAATTTTGACAGATAACTTAGTGTC                                         |
| TdelSat24-147 | 0.030 | 11.84 | 0.63 | OQ082101 | >TdelSat24-147<br>CCAAGAAAGTTCATTTTATGGCGTTTTGGGTGGGGGGTAAGGGGCAAGCTTTTCCC<br>AAAATAGTGGTTTTTATTGTTTAGATTCTCCCACTGATGTAAAATTGAAGACAAC<br>AAACATCTAGTGAGAGAATTAGACTTTTGAAAGTT |
| TdelSat25-138 | 0.028 | 24.02 | 0.60 | OQ082102 | >TdelSat25-138<br>TATGGGGTCACAGGGCGAATAGTAGCGTCAAGCTTCTCTACGGTACCACTTCA<br>GTACAAAAATACGGTTCTCCCACTACATACATAAATGCCAACCTTGATTTGAA<br>GTATTGTTCCAAGAAAAGTGTTTTTTT              |
| TdelSat26-32  | 0.028 | 2.28  | 0.63 | OQ082103 | >TdelSat26-32<br>AATTGCCACCGTTTGTCTGTATGTACAACAT                                                                                                                             |
| TdelSat27-57  | 0.026 | 2.7   | 0.63 | OQ082104 | >TdelSat27-57<br>AAAGAAAAGTGAAGGGAAAATCTTTGCTGTTTGTGTGGAGTAAGGTTACTT<br>GC                                                                                                   |

|                      |       |       |      |          |                                                                                                                                                                                                                         |
|----------------------|-------|-------|------|----------|-------------------------------------------------------------------------------------------------------------------------------------------------------------------------------------------------------------------------|
| TdelSat28-5-Telomere | 0.024 | 1.14  | 0.60 |          | >TdelSat28-5-telomere<br>TTAGG                                                                                                                                                                                          |
| TdelSat29-137        | 0.023 | 16    | 0.62 | OQ082105 | >TdelSat29-137<br>CTACAATGAGATATATATAAAGTGACGAATTTACTTTAAACTTCCAATTTTACTCA<br>TTTGTCTAACATATAGTTTGGTGATGTTAGGAGGGGGAGGTGGTGGGGGACACT<br>CACACGACTTTCTCTTACTCCTGTTA                                                      |
| TdelSat30-38         | 0.022 | 3.24  | 0.63 | OQ082106 | >TdelSat30-38<br>ACACACTAAGTGAACAATAGTAATACTCGTCCTTGTAC                                                                                                                                                                 |
| TdelSat31-52         | 0.022 | 2.76  | 0.52 | OQ082107 | >TdelSat31-52<br>ACTTACTGCTCAGTCCAACTTCACACGGTCACACATGAGGTCGTTACAGTC                                                                                                                                                    |
| TdelSat32-49         | 0.022 | 5.33  | 0.71 | OQ082108 | >TdelSat32-49<br>GAAGCTGTACAATAGTCAATTAGAATTAACAGAAAATTATGTGAAAGGT                                                                                                                                                      |
| TdelSat33-46         | 0.022 | 2.27  | 0.54 | OQ082109 | >TdelSat33-46<br>AATGCCCTAGTATGGTGTAGGTGGTAGAACCGTCTATTGTACTGA                                                                                                                                                          |
| TdelSat34-27         | 0.019 | 1.76  | 0.70 | OQ082110 | >TdelSat34-27<br>ATGGTTATACATTGTGTTCACTTATCT                                                                                                                                                                            |
| TdelSat35-188        | 0.018 | 2.49  | 0.67 | OQ082111 | >TdelSat35-188<br>TGAGCCATTTCCATTGTTCTATACTCTGTTTCCTCTAGGAGCTAAGACCGGTTTCAG<br>GCCCATTATTTCTAGTTCATTTTTATTTATTTTGTCAACCATTTTCTAAATTATCTA<br>GGTTAATAAACATGCTATTCAATCCTACCTTTCAAATATTTTATACTTTCTACGC<br>CCTGAAGTAGTGGTTC |
| TdelSat36-128        | 0.018 | 13.48 | 0.63 | OQ082112 | >TdelSat36-128<br>TCTCAATTACTCATATGTCCTAATATAAATATACAGGTGGTGGGAGACAAGTGCC<br>AGCCTAGCAACACAGACAGGTACAGAATGATTACATTGTAGACAGCCAATAATA<br>TTGAACAAACACATTTGAA                                                              |
| TdelSat37-38         | 0.017 | 1.13  | 0.58 | OQ082113 | >TdelSat37-38<br>TGGTGTGTAATATTCACGCGCCTTTCCCATATCTATTG                                                                                                                                                                 |
| TdelSat38-147        | 0.016 | 8.43  | 0.59 | OQ082114 | >TdelSat38-147<br>GTTATCTGGTTGGCTTTTTCTGCGTTTCAGATTTTCGATTCTTTCTGCCGCAGTT<br>TTTGATCCCGCTTGAATGAATGGTGGGATTGGTGAACATTGTCTATTTCAGATAT<br>CGATTGTGAGCATCTTCACCTTCATTACTTGA                                                |
| TdelSat39-18         | 0.016 | 6.08  | 0.56 | OQ082115 | >TdelSat39-18<br>GCTAGTACTGCTCTTACT                                                                                                                                                                                     |
| TdelSat40-72         | 0.016 | 4.92  | 0.64 | OQ082116 | >TdelSat40-72<br>TTAGCGAAATGTCTGTATGTATGTGTGAGTGTGTGAGAGAAAGAGAAAGAGAAA<br>CCATCTCCAAAAATGTTT                                                                                                                           |

|               |       |       |      |          |                                                                                                                                                              |
|---------------|-------|-------|------|----------|--------------------------------------------------------------------------------------------------------------------------------------------------------------|
| TdelSat41-49  | 0.015 | 2.08  | 0.61 | OQ082117 | >TdelSat41-49<br>AGAAGACTGGAGGAGAAGAAGAAGAAGTATGAAATACTGGAGTAGT                                                                                              |
| TdelSat42-128 | 0.015 | 0.72  | 0.60 | OQ082118 | >TdelSat42-128<br>CCCTTCCATACCCTTTTGTAATTTTGTTTACAGTGTTTCAGTTAGGAGGTGTTAGCCA<br>TGAACAGAAAAGTGGAAAGTGCTTATATTTGGCCATCTGATTATGTTTGGATCTCTA<br>ACTGGAAGGCACTTC |
| TdelSat43-111 | 0.015 | 9.47  | 0.68 | OQ082119 | >TdelSat43-111<br>AAAAAAAAAATCTGGTGTGAAACACTAACACCTTTCTCTTACAGCTAGCATAGGAA<br>GTACTGTGATCGTGTCATTTTTTTTAAAAATTGAGTTTACACCGGAAAGACATATTT                      |
| TdelSat44-34  | 0.014 | 10    | 0.56 | OQ082120 | >TdelSat44-34<br>ATGGACAGTAATTTGGTGGGACCCTGTTGTAACA                                                                                                          |
| TdelSat45-102 | 0.014 | 5.9   | 0.64 | OQ082121 | >TdelSat45-102<br>TTCGCGGAAAAAAGTTCCCAATAAAAGTGACGGCATTTCATTTCACAGTTACTGT<br>AGGACGTTTAGTGAAATCCGTTGCCATTTTTACTAAATAAATCAACT                                 |
| TdelSat46-114 | 0.014 | 4.71  | 0.68 | OQ082122 | >TdelSat46-114<br>TATCGTTACAACACTATTATTAATCTCATTACAGAGAATCTCTATATCGTTTTTAGCAG<br>AACATTCTACAATAACTCCGCCATTAGAGATTCCCTTAATGTTTTCTACACCCAAT<br>T               |
| TdelSat47-25  | 0.014 | 4.16  | 0.64 | OQ082123 | >TdelSat47-25<br>TTGCTGGTTGTTGTAAGAAGGTATA                                                                                                                   |
| TdelSat48-118 | 0.014 | 16.72 | 0.64 | OQ082124 | >TdelSat48-118<br>ATACAATTTAACTGTTCAATCGCTTGTACAGCAGTAAATGGAACCATTAACCTTGCT<br>ACCAGGTGTTTCAAAGTAAACTGGTGTGAAATATTCACACGACTTCTCTTACTC<br>CAGTTA              |
| TdelSat49-49  | 0.014 | 4.47  | 0.71 | OQ082125 | >TdelSat49-49<br>CAAAACAAAAATGATACGATCTGTATACATTCTCTTACACAGTAAGTGAAAA                                                                                        |
| TdelSat50-101 | 0.013 | 12.06 | 0.68 | OQ082126 | >TdelSat50-101<br>ATATTTGTAGCAAAATAGTTAATTCTAAAGTAGGGGGGGGAATGCAGAGAGCAG<br>TCAACTTCATTTGAACATAAACATCATTTATTATGTAACTTACACT                                   |
| TdelSat51-46  | 0.013 | 2.73  | 0.63 | OQ082127 | >TdelSat51-46<br>ATGTACAGCCGATACAGAAAGTGTAATAAAAGTTGTCGCTCTTTGT                                                                                              |
| TdelSat52-88  | 0.013 | 7.19  | 0.73 | OQ082128 | >TdelSat52-88<br>AGGTGAGTGTTGTACTAAAATGAAATTTTTAGATGAATTTTGGTGAAAATAGTGG<br>ATCTAGTATTTTATTGTACATTAAACACAACG                                                 |
| TdelSat53-48  | 0.013 | 4.74  | 0.54 | OQ082129 | >TdelSat53-48<br>TATAGAGAAAAGCCTAACGTTACAGTTCTCCCCAGCCCGAACTGTTAC                                                                                            |

|               |       |       |      |          |                                                                                                                                                                                                                                                                                                                                                                     |
|---------------|-------|-------|------|----------|---------------------------------------------------------------------------------------------------------------------------------------------------------------------------------------------------------------------------------------------------------------------------------------------------------------------------------------------------------------------|
| TdelSat54-189 | 0.013 | 17.6  | 0.60 | OQ082130 | >TdelSat54-189<br>TTTCAAATTTTGCTCATATATCCCAACATAAAATATCCAGGTGGTGGGGGGAGGGA<br>CGAGTGCCAATGTACCACCAGGGCAGGTAGATAACGGATTGCACGGTAGAGAGC<br>GTCAATAATGAACAAACACATTTGAATTTTAAACGTCTCTTGATTCCTCAGAGAAC<br>CACCTAAAAACAATTTTTTTTAAA                                                                                                                                        |
| TdelSat55-51  | 0.012 | 2.9   | 0.65 | OQ082131 | >TdelSat55-51<br>GTATACAAATGTATTATATAGCCAGCCTAACTAAACATTGTAGCCGTTTCAG                                                                                                                                                                                                                                                                                               |
| TdelSat56-102 | 0.012 | 1.46  | 0.60 | OQ082132 | >TdelSat56-102<br>TTATTACTTGATGAGCTAGGGCTAGTCATTACATTTTCGTAACCAGACAAAGCTT<br>CATCTATCAACTCGCAATATTACAGGTAACAGCTGCAGATTCCGGAC                                                                                                                                                                                                                                        |
| TdelSat57-271 | 0.012 | 18.68 | 0.70 | OQ082133 | >TdelSat57-271<br>TCTACACATATAAAATCCCTTTCACTTTTTATTTGTAAATTTTTTTTGAAAAACATG<br>GATTTTAATGTAGTTTTGCGGAATCTGTAGCGTTGAAATTCAAATTTATATGGGCT<br>TGATGGTTGAATGTTATTGGCACACTCTTCTGGCCGACTTGTCATCACTTCTACTAT<br>CCTACTTTTTACTTTCTTACTCCTACTAACAGGAAGTATTTATTTTTTTGTGTTT<br>TGCGATTTCCCTCAAACAATGGCTTCAAATTTTGTATACTA                                                        |
| TdelSat58-84  | 0.011 | 1.99  | 0.62 | OQ082134 | >TdelSat58-84<br>CTGACAGACAGCTGACGCTATATCAGAATACCATATTTTTCTCTTGTTGAAGATG<br>TGTGATCTCCTTCTAAGATTGTGCATTC                                                                                                                                                                                                                                                            |
| TdelSat59-63  | 0.011 | 12.44 | 0.41 | OQ082135 | >TdelSat59-63<br>CGTGGCCTAAGTGCTCGTCCAGTTCGATGATTGGTCAGTTGGAGAGGGGTGGGGG<br>TAAGTGGG                                                                                                                                                                                                                                                                                |
| TdelSat60-99  | 0.011 | 9.24  | 0.69 | OQ082136 | >TdelSat60-99<br>TACGTATTGCGTCATACCGTGCAACATGACATGTCTCAACATGTTCAATTTAATTT<br>ATTTCTTACTCTTGCTAAAACATCGAAAAAATACTAGATTGG                                                                                                                                                                                                                                             |
| TdelSat61-315 | 0.010 | 15.5  | 0.62 | OQ082137 | >TdelSat61-315<br>ACAATTTATAAGGCCGAGACTGTAGGTGAAAACCTGAAAGCGACTGTAAAGCTT<br>CCAGATTGGAAGGGTACAACCTGAATCAGCTAATTACGCAATTACTACCGGTAACC<br>CTGCGTATATGAAGTCAACAATTACGTTAGATAAAGACATCTATCCCGCAAATAG<br>TGATATGAAGGTTACGGTAACCTTGAAAGATTTGTATGGTAATAGCGTAACCTGGA<br>AAAGTTGCAGAATTAAGTATGCGGTAGTAACAGTACCAAATGCAAAAAATGAAA<br>ATAGGTGAAAAATGGAAAGAAAATGAAGCTGGGACCTATACT |
| TdelSat62-53  | 0.009 | 0.4   | 0.68 | OQ082138 | >TdelSat62-53<br>TCACACATTATAGAGGCGAAACGGTTTGGTTTTCCAAATTTATGTTTCATTTA                                                                                                                                                                                                                                                                                              |
| TdelSat63-51  | 0.009 | 1.94  | 0.71 | OQ082139 | >TdelSat63-51<br>GGTTGGTTCCAACATAAATTAGCAATTAATAGAAAAACATAATTGTTGTGGT                                                                                                                                                                                                                                                                                               |
| TdelSat64-39  | 0.009 | 5.81  | 0.82 | OQ082140 | >TdelSat64-39<br>ACTAACTACACACATAATTATTTAAATTATATATCGTAT                                                                                                                                                                                                                                                                                                            |

|               |       |      |      |          |                                                                                                                                                                                                                                                                                                                                                                                                                              |
|---------------|-------|------|------|----------|------------------------------------------------------------------------------------------------------------------------------------------------------------------------------------------------------------------------------------------------------------------------------------------------------------------------------------------------------------------------------------------------------------------------------|
| TdelSat65-71  | 0.008 | 6.75 | 0.62 | OQ082141 | >TdelSat65-71<br>GGGTCAGGTGGGGACAACCTGGCTGCTTGTAAGTGATTGCAATAATACAAAATAC<br>GATACATAAATATAGA                                                                                                                                                                                                                                                                                                                                 |
| TdelSat66-64  | 0.008 | 0.5  | 0.78 | OQ082142 | >TdelSat66-64<br>AATGTGCAAAATCTAAGTAATATTTATGACAAAGTTCTACATTCTAATACTAATAT<br>AAAATGGA                                                                                                                                                                                                                                                                                                                                        |
| TdelSat67-83  | 0.008 | 2.95 | 0.71 | OQ082143 | >TdelSat67-83<br>AAAAACATATACATATCACCCCTGTACTATTGATTAAGCTCCCAAATCTCTTTAAC<br>ATAACTTTACACTATTACTATACCTAG                                                                                                                                                                                                                                                                                                                     |
| TdelSat68-160 | 0.008 | 7.98 | 0.63 | OQ082144 | >TdelSat68-160<br>TAGTGCTGCGTTTGTGCCGGCGATTACCAAATTCATCGTTTGTGCCGTAAAATT<br>GACAAAGATATTAAAGAAAAAAGTGCCAGTCCAACCTTGACGTCAAGTTAGAC<br>TGGCCACCAATTTCTATTCACTTTTTTAAAAATTTCTTTTTACCAATCGT                                                                                                                                                                                                                                      |
| TdelSat69-52  | 0.007 | 0.33 | 0.63 | OQ082145 | >TdelSat69-52<br>GTATATAGATAAGTGGTGGGTGTAATTTGTAGAGAATGTTGTCGTCTGTTCA                                                                                                                                                                                                                                                                                                                                                        |
| TdelSat70-86  | 0.007 | 8.15 | 0.58 | OQ082146 | >TdelSat70-86<br>GTACCACTGCTTCTAACACGAACGGAAGGTTAGTGGCAGTTTGTGATACCTAAAC<br>GGAATGTCAAACTTGGTATTCCGTTTATGTA                                                                                                                                                                                                                                                                                                                  |
| TdelSat71-102 | 0.007 | 0.85 | 0.64 | OQ082147 | >TdelSat71-102<br>GGAATTTAAATAGAGTCCGTTACAAACGGTAATGAATTATTTTTTTCTAAGCCAC<br>TATAACTAGGGCTAGTAGCAACCAGCACTGTCTATCAGCTCATTTT                                                                                                                                                                                                                                                                                                  |
| TdelSat72-85  | 0.007 | 6.2  | 0.60 | OQ082148 | >TdelSat72-85<br>ATAACATAAATATGGAGGTGGTGGGAGATAGGTAAATACCTCTCTACTCAGCTGG<br>CAGGTAGACAAGTGTTTATGTATTTGTCCT                                                                                                                                                                                                                                                                                                                   |
| TdelSat73-372 | 0.007 | 4.41 | 0.58 | OQ082149 | >TdelSat73-372<br>TAGTGCTGCGTTTGTGCCGGCGATTACCAAATTTCAACGTTTGTGCCGTAAAATT<br>GACAAAGATATTGACGAAAAACTGTTTCGTCGTAATTGAAAACCAAAGGCCATGG<br>CTGCGAGTAACATTTGAATGTGCGCGTGCTCCACTGACCGCCAACGGCCCTTATC<br>AGGGCCAGCAACTAAAAATGTAAGTGGCCCTCGATTCTAATCAAAATTTCTGGAATT<br>TTTTCTTCGCTATTCTTAAGTGATTCATTTGTGCCAGCGACCCACCAAATTTAGCG<br>TTTGTGCTGCAAAATTGACAAAGTTATTGAGGCGTCAAGTTAGACTGGCCACCAA<br>TTTCTATTCATTTTTTAACTTTTCTTTTGCCAATCGT |
| TdelSat74-137 | 0.007 | 4.77 | 0.62 | OQ082150 | >TdelSat74-137<br>TCAATATTATGATGGTCGCGGCTACAGATTCTGTAAAAATTCCATGATTGAAGAA<br>AATTTGTCCCGTCGCAAGTCTTCTCTTACGAGGAGTAAAAGGAAATAAAAAACT<br>AATAATGTACAATTATGGCCCCCCCCA                                                                                                                                                                                                                                                           |

|               |       |       |      |          |                                                                                                                                                                                                                     |
|---------------|-------|-------|------|----------|---------------------------------------------------------------------------------------------------------------------------------------------------------------------------------------------------------------------|
| TdelSat75-25  | 0.007 | 1.7   | 0.71 | OQ082151 | >TdelSat75-25<br>TTATATAGTTGGTGTATAGTTCATTGTACTTGGTA                                                                                                                                                                |
| TdelSat76-96  | 0.007 | 7.29  | 0.70 | OQ082152 | >TdelSat76-96<br>GGCAAGAAAGGTAATGAGTACAAAGTTTTATTTTACATAATAGGATTAAGTATT<br>ACTAAACATGTTAATAAGACCTGTGGTAACATGTCCGAACA                                                                                                |
| TdelSat77-102 | 0.007 | 1.36  | 0.79 | OQ082153 | >TdelSat77-102<br>CAAATTTTAAATTTTCGCTTTTATTGTAAGTATGCTTTTTAAATGCGATTAACATTA<br>TCATTAATCAAAATGTTAAGTCTTAATATAGATTAGTTATGTACA                                                                                        |
| TdelSat78-29  | 0.006 | 1.95  | 0.59 | OQ082153 | >TdelSat78-29<br>CTGTACAGAATAGCTAAGTGTGTGTGTGA                                                                                                                                                                      |
| TdelSat79-26  | 0.006 | 4.22  | 0.62 | OQ082155 | >TdelSat79-26<br>GTACCTAACACCATCTACACAGATAA                                                                                                                                                                         |
| TdelSat80-52  | 0.006 | 7.61  | 0.42 | OQ082156 | >TdelSat80-52<br>GGAGGGGGGTGACGTGGGACTTCCCTCTGCGATATCCTGTAGCGATTGT                                                                                                                                                  |
| TdelSat81-185 | 0.006 | 12.38 | 0.68 | OQ082157 | >TdelSat81-185<br>CACACACCACACACACATATATATATAGAAAGAGAAAGAAAACAATTTTATA<br>AAAATCACATTTTGGACTCAGGGGATCTCAAAACATACACTTGCAATTTTATTTA<br>ATTGAAACTGCGTGTCGTATTCCCTAGAGATATCCATAATATGAGAGTTATATTGT<br>TTCCCTCTCACACGCATA |
| TdelSat82-108 | 0.006 | 3.6   | 0.60 | OQ082158 | >TdelSat82-108<br>CCTTCTCACTTGGCAAAATTAAGAATGGTAAAACCCCTAGCTGCAACAGTAATTT<br>CTTTGGTGTATCACACCCGTTCTAGAAAGCCCAAATTACCCTAGAAGAATTAA                                                                                  |
| TdelSat83-66  | 0.006 | 7.66  | 0.68 | OQ082159 | >TdelSat83-66<br>GGTACATCTAACAGTTTGTATAGGTACCTCTAACAGTTTATATAGATACATGCAAC<br>AGTTTACATA                                                                                                                             |
| TdelSat84-73  | 0.006 | 4.24  | 0.52 | OQ082160 | >TdelSat84-73<br>GTTTCTCCTGGTACGAGGAGTACACCAACTTGGTATGTCATCGGAAC TACCCATG<br>GCATCTACATGACTTCCT                                                                                                                     |
| TdelSat85-49  | 0.006 | 0.04  | 0.71 | OQ082161 | >TdelSat85-49<br>TATTCTCTACTTTCACCAATGTACATAATTGTCAATGTTTGTCCAATA                                                                                                                                                   |
| TdelSat86-164 | 0.005 | 6.95  | 0.62 | OQ082162 | >TdelSat86-164<br>AATTGTTTGGAGTTAAATAAGGTGAGTGGCCAGTGCTGCTGTGCTGGTCACGTTTG<br>TAGCTTTGTTAACATAATCCTTCAATTCTACCCACAGCTTGCCGTTATGTTAGTTC<br>TTAGGAATTAACATATATATGCGGCGCCTCTTTTATTTTATTTTAGCGTAG                       |
| TdelSat87-61  | 0.005 | 1.49  | 0.67 | OQ082163 | >TdelSat87-61<br>CCTGTAATCAGTAAAGGAACAGATAGAAATAAGGTCCTCATTTCCCAATTATCTA<br>TTAGTA                                                                                                                                  |



|               |       |       |      |          |                                                                                                                                                                                                                                                                              |
|---------------|-------|-------|------|----------|------------------------------------------------------------------------------------------------------------------------------------------------------------------------------------------------------------------------------------------------------------------------------|
| TdelSat88-87  | 0.005 | 16.82 | 0.71 | OQ082164 | >TdelSat88-87<br>TAACTGCAATGAGACCAAGTCGTCTGAATGTTTCACACCATTGAGTAACATTACA<br>ATATAAAGAAAATTTGTAAATTGTAATTGTAT                                                                                                                                                                 |
| TdelSat89-86  | 0.005 | 1.93  | 0.78 | OQ082165 | >TdelSat89-86<br>GTAGGTACAGATACAGTTACGGTTTAAAAATAAAATAAATGAAAAATAAAATAAAAA<br>TGATATATTTCTAGATTACATGTTTACAGTTG                                                                                                                                                               |
| TdelSat90-157 | 0.005 | 3.42  | 0.75 | OQ082166 | >TdelSat90-157<br>TTTGTAATTTAGAATTAGAGAAAATTTGTAAATGTAAATATAAGCATTAAATTTGGT<br>ATGGATATTTACAAACATAGTTTACACTTTAAATGTATGACAAGCGATTAGAAA<br>AAGTATCAAGTATTTTATTATCCTGACAGGAAATGGCGCGTTTAAA                                                                                      |
| TdelSat91-23  | 0.005 | 0.87  | 0.70 | OQ082167 | >TdelSat91-23<br>ACATGTGTACCAATGTAAACAAT                                                                                                                                                                                                                                     |
| TdelSat92-196 | 0.005 | 8.89  | 0.67 | OQ082168 | >TdelSat92-196<br>TTTGTTTTATTTTTCTATTTATCCTGACATAAATATATAGAGGGGAGTAAGGGGATC<br>AGGACACTTATCCACTAACCTGGACTGGTAGGGAAAGTGATATATTGTGATCAAGA<br>AGAAAGCACCAAAAACACTGAAGATTTGCTGTTACTCTGTCTAGTACAATTATATA<br>CAAAAGGACAAATTTTCTTTAAATCAAT                                          |
| TdelSat93-57  | 0.004 | 4.09  | 0.61 | OQ082169 | >TdelSat93-57<br>GATCAATTTTGACCAAAACCTTAGTATCTATTCAGTAAAGTGGTGGCACAGGAGG<br>AT                                                                                                                                                                                               |
| TdelSat94-72  | 0.004 | 7.29  | 0.65 | OQ082170 | >TdelSat94-72<br>TCCAGCCACACTAACTTCAAATATTAGAATAGTTTTCGCCATTAAACCATATCACC<br>AATCAACGTTCTAACA                                                                                                                                                                                |
| TdelSat95-38  | 0.004 | 6.35  | 0.63 | OQ082171 | >TdelSat95-38<br>TAACCCGTAGATATTGTTGGAGGAATATTGCTGGAATA                                                                                                                                                                                                                      |
| TdelSat96-58  | 0.004 | 1.79  | 0.74 | OQ082172 | >TdelSat96-58<br>GATTTGATTATGAACCTTAGTTACAGCCTTTTATAATTTTATTTTCTAAATTGGG<br>T                                                                                                                                                                                                |
| TdelSat97-238 | 0.004 | 5.81  | 0.71 | OQ082173 | >TdelSat97-238<br>CCAAACAACAATAATATGAACGGTTAACGGTCGTTTTTTTCCATCAGTTACCATTC<br>AAACAGTTACAAAGTAGTGCAATTTAACATTTTTTAATAAACTATTTCCATGTTTT<br>CCAATTATTTTCGTATTATTTTCTCTTTGAACACTATATCCAACCTGGCACATTCCA<br>ATCTAACAAAAGTTTTATATGTTTTCCACCTATATTTTATTAACACTACACCCAC<br>CTTGAACATT |
| TdelSat98-104 | 0.004 | 1.1   | 0.65 | OQ082174 | >TdelSat98-104<br>AGTGCAAATAGAATTTAAATCTAACGCCACACAGATTCCTTACAACCTCACTCAGT<br>ATCAATTTTCTAATGTCAGAGTACATGATTACATCATTGTCCAGAAGTC                                                                                                                                              |

|                |       |       |      |          |                                                                                                                                                                            |
|----------------|-------|-------|------|----------|----------------------------------------------------------------------------------------------------------------------------------------------------------------------------|
| TdelSat99-128  | 0.004 | 4.57  | 0.56 | OQ082175 | >TdelSat99-128<br>GGGGTAAATTTGAAATATATTGGTGGCTGGTTGTTTGTATTGGCGCGAACCATAT<br>TTCCCTAGCTGCTTGCCTTGCTAGCTCCCTCCATTTACGCTACATACAAGAAAGTA<br>CAAAATTGTGGGGGA                   |
| TdelSat100-99  | 0.004 | 0.23  | 0.66 | OQ082176 | >TdelSat100-99<br>TCAGAACATACATACAAAAAGTAGCGTGACTTGTTTTCTCTTGTTGTAATCGA<br>AAACTGTCATGCCCAGCTTGTCACCATATATTGGTTATATTAT                                                     |
| TdelSat101-55  | 0.004 | 1.2   | 0.71 | OQ082177 | >TdelSat101-55<br>AAAATTGTAAAAACAATAGCCACCTCAGAAAGAAAAGTGTTATACTAGTATTGGAT                                                                                                 |
| TdelSat102-39  | 0.004 | 3.44  | 0.74 | OQ082178 | >TdelSat102-39<br>TGAAGTTAGATTTTTGAAAAATTATATTCTGATCGATCTG                                                                                                                 |
| TdelSat103-138 | 0.004 | 2.07  | 0.70 | OQ082179 | >TdelSat103-138<br>TACATTTACAGTTGCCGAAAGTATTTCGAACTATATCTTGTTTCTGGAAATTGGTC<br>GCCCTCCGATTTATTTATTGAATAGTTTATCTAAAGGATGTACTAGCACACTGCTA<br>TTAGAAATAATTCCTTTAAAAAATA       |
| TdelSat104-78  | 0.004 | 1.82  | 0.62 | OQ082180 | >TdelSat104-78<br>CGAAACTTGACAATGAAATATCTTTATTTTTATTGCGGTTATAGTGAGACGCGCCC<br>TAATGAGCTGATGAGATACTGC                                                                       |
| TdelSat105-35  | 0.004 | 4.44  | 0.57 | OQ082181 | >TdelSat105-35<br>CTATCTGCCCACATATAGTTCATAACTTGGCATG                                                                                                                       |
| TdelSat106-44  | 0.004 | 5.73  | 0.57 | OQ082182 | >TdelSat106-44<br>TAGGTAGTGCTAACACCAACAGAATCAATATTACCCCACTC                                                                                                                |
| TdelSat107-57  | 0.004 | 10.56 | 0.58 | OQ082183 | >TdelSat107-57<br>GAGCCCCGCTACACCCATAGTATAGCAAATAAAATAGCACATTAGAGAATAG<br>CAT                                                                                              |
| TdelSat108-81  | 0.004 | 6.98  | 0.49 | OQ082184 | >TdelSat108-81<br>TACAGCAGATTGTATGGACTGCCCTCACTAGGCTGGTCCAGTCCAATCACAGACC<br>CCCATATTTAAAACCCCAAATCCCC                                                                     |
| TdelSat109-142 | 0.004 | 3.73  | 0.61 | OQ082185 | >TdelSat109-142<br>TAGTGTGTTGATGTTCTTTAAGACCGTTGTATTTGGATATTGTATGGAATGGATGTCG<br>TGGTTGGGTCAGTATCCGACTAATATAGTAACAAATAAGAACAACACACTGTCCG<br>AACCTCTGCACCCATTGACAAGCTCAGTAA |
| TdelSat110-99  | 0.004 | 2.61  | 0.78 | OQ082186 | >TdelSat110-99<br>ATTATAAAAACAATACATATCTAACTAAATATACCAAGATAACAAAGTTATAAA<br>CCAACGATACAAGAAAACCAAACCTGTAAAAAGTAAAGTTTAAAC                                                  |

|                |       |       |      |          |                                                                                                                                                                                                                                                                                                                                                                                                           |
|----------------|-------|-------|------|----------|-----------------------------------------------------------------------------------------------------------------------------------------------------------------------------------------------------------------------------------------------------------------------------------------------------------------------------------------------------------------------------------------------------------|
| TdelSat111-7   | 0.004 | 15.29 | 0.86 | OQ082187 | >TdelSat111-7<br>ACAATTT                                                                                                                                                                                                                                                                                                                                                                                  |
| TdelSat112-113 | 0.004 | 2.75  | 0.55 | OQ082188 | >TdelSat112-113<br>GTAGTGGTGTCCGTGAAGAATCGCAGACAGCATTGGATTGGCAGAGAGGATTAG<br>AGTGCATCCTGGCTCTGGCGAGTAGTTTGTACAGTCCTTGTTTAATAAAGTCACTA<br>ATA                                                                                                                                                                                                                                                              |
| TdelSat113-88  | 0.004 | 3.18  | 0.57 | OQ082189 | >TdelSat113-88<br>CCCTCTGCCTCTCCATTTATTATGTGATGTTATTGGCAGTACATTGTAATAGCACTT<br>CTTCTACCTGCCTGGGTAGAGTTACTTGTCC                                                                                                                                                                                                                                                                                            |
| TdelSat114-56  | 0.004 | 5.82  | 0.68 | OQ082190 | >TdelSat114-56<br>ATTTCAATGCACTATAAACAATAGTTATGTCTGGCCGTGGTTAATTAAGAGAAAC<br>T                                                                                                                                                                                                                                                                                                                            |
| TdelSat115-15  | 0.004 | 4.85  | 0.73 | OQ082191 | >TdelSat115-15<br>GTAGTGTTTAGTAAA                                                                                                                                                                                                                                                                                                                                                                         |
| TdelSat116-66  | 0.003 | 2.22  | 0.79 | OQ082192 | >TdelSat116-66<br>AAGTAATTTTTCTGAGTAGAAGTAAAAATATAAAGAAATTATTTTGGTTTGTCAAAA<br>TGACTAGAAT                                                                                                                                                                                                                                                                                                                 |
| TdelSat117-46  | 0.003 | 9.49  | 0.67 | OQ082193 | >TdelSat117-46<br>ATCTAGTAAACAGTTCTCCACCTATATAATATTACAGTTACCATC                                                                                                                                                                                                                                                                                                                                           |
| TdelSat118-207 | 0.003 | 6.97  | 0.62 | OQ082194 | >TdelSat118-207<br>TCAGTGGGCTTTTCGGTTACTCTAGTTGTAGCTTCAGTATCATGAATTGTAGATTGT<br>TCTGTGATAAGTGTAAGTCGGTTGCTCAGTGTGTTGTTGTAAATTCATCAGCGGTTTGT<br>GCATCCGTGCTAGATCCTATGTAAGATGCAGTATGGTCATTGTGTAATATTTCCG<br>GTTATTTGGTGTATTCGGTTTGAATGTTGTTATAATA                                                                                                                                                           |
| TdelSat119-348 | 0.003 | 4.01  | 0.55 | OQ082195 | >TdelSat119-348<br>GTGAAGCCTATCACAACCTCGGCAACCTACACCGAAGAGTTCTCAACAATACAAT<br>CTTCATCACCTCATTCCACAGAACCAACATCAGAAAGTTATACTACTAACAGCCA<br>TCGCACAACCTGAATCAGAATCTACACCAATCACACAATCAAGCCCAGAGATACA<br>TACCATATTTACGTCCGCGTCCCCATCTACTGAGAACAGTGCAACAACAACCGCC<br>ACCGCGCACACATCACAGCCTAGCTCTGAAACATTCAATACAATTAATACTACTA<br>CGGGTCCGGGCACTGAAACCTATTCAACAATAGTGGGTTTCAGGCTCGACATCTCA<br>CAGCGAAGGTTATACTTCC |
| TdelSat120-101 | 0.003 | 2.83  | 0.74 | OQ082196 | >TdelSat120-101<br>GTAATGAAAAAATAAAGTATTTAATATCTAACTTGATAATTGAAAACATCCAATT<br>AAAATTTATTAATGCTTGCCCAAAGGCCGGTCTCTATACACATATT                                                                                                                                                                                                                                                                              |

|                |       |       |      |          |                                                                                                                                                                                   |
|----------------|-------|-------|------|----------|-----------------------------------------------------------------------------------------------------------------------------------------------------------------------------------|
| TdelSat121-51  | 0.003 | 11.93 | 0.63 | OQ082197 | >TdelSat121-51<br>CTTTCTCGGGAAAAAGTTCTTCTTCCCTTCCCCAAAACCTTCTTTCAATAAA                                                                                                            |
| TdelSat122-43  | 0.003 | 4.33  | 0.72 | OQ082198 | >TdelSat122-43<br>ACTTAAGTATTGTAAAATTGAAGACAAGCAAACGAAATTGAAG                                                                                                                     |
| TdelSat123-149 | 0.003 | 2.82  | 0.77 | OQ082199 | >TdelSat123-149<br>TTTTTACAACCTGACTTCGTCTATACAAAAAGGAACCTAATTCCTAAAATACAATTC<br>GAAATATTTTAGTTTTTCTTACTTTTCTATAGAAATATTAAGAATATTCTTATAGAA<br>GATAATGATTAATATGAGTGTATGAGGTGTAAAATG |
| TdelSat124-69  | 0.003 | 1.85  | 0.65 | OQ082200 | >TdelSat124-69<br>TAAGAGGTCTTGAATAAGTAATAGTAGTAGTAGTAGTAGAAATGTATAAAACCTC<br>TACACCGGGTGGTA                                                                                       |
| TdelSat125-35  | 0.003 | 9.52  | 0.54 | OQ082201 | >TdelSat125-35<br>TCCCCATCTCCATTTTAGAGGTAAGACACTTCCAC                                                                                                                             |
| TdelSat126-46  | 0.003 | 6.94  | 0.54 | OQ082202 | >TdelSat126-46<br>TACACATCTACCAGCACATCAACGACACATCTACCAGCACATCAAC                                                                                                                  |
| TdelSat127-49  | 0.003 | 5.5   | 0.65 | OQ082203 | >TdelSat127-49<br>CTGTACAGTGAATTGAAATAACACATTAGAGGAAAGCATAACCCCATAT                                                                                                               |
| TdelSat128-66  | 0.003 | 0.23  | 0.73 | OQ082204 | >TdelSat128-66<br>AAAGGAAAATCAATCTGACAACCTATTAACATAAAACAACTGCTATTAACGAAAC<br>AACAAACACATA                                                                                         |
| TdelSat129-60  | 0.002 | 6.5   | 0.63 | OQ082205 | >TdelSat129-60<br>ACCGTTATATGTTTCTATTTATGCTGCAAGCCTCTGCCAAGTTTAAAGAACTCTCT<br>GTT                                                                                                 |
| TdelSat130-105 | 0.002 | 0.6   | 0.72 | OQ082206 | >TdelSat130-105<br>AGTGGACAAACAACAGTATAATAAATTGATTAGAACCTAAATTGACTTGACTAGT<br>ATTTCTCTGTGGAATCTTAAACATAAAATACAATGTCCTTCATCTAAATT                                                  |
| TdelSat131-66  | 0.002 | 1.42  | 0.65 | OQ082207 | >TdelSat131-66<br>ACAATGGTGTAATACTCTGTCCAGTTGTCCTAATAAAAAGAAGATGACATACAT<br>GTCAGATCTAG                                                                                           |
| TdelSat132-39  | 0.002 | 1.82  | 0.72 | OQ082208 | >TdelSat132-39<br>AATAGTTGTATAAACTGTATTACAGAGTAAGATTGTTG                                                                                                                          |
| TdelSat133-28  | 0.002 | 3.73  | 0.61 | OQ082209 | >TdelSat133-28<br>AGGTGTAGTTGCTGAGATAGATGTAGAT                                                                                                                                    |

|                |       |      |      |          |                                                                                                                                                                                                                                                                                                                                                                                                                           |
|----------------|-------|------|------|----------|---------------------------------------------------------------------------------------------------------------------------------------------------------------------------------------------------------------------------------------------------------------------------------------------------------------------------------------------------------------------------------------------------------------------------|
| TdelSat134-32  | 0.002 | 8.44 | 0.72 | OQ082210 | >TdelSat134-32<br>GGAAATATTACGATCGTATTA AAACTGTAAGA                                                                                                                                                                                                                                                                                                                                                                       |
| TdelSat135-105 | 0.002 | 7.8  | 0.58 | OQ082211 | >TdelSat135-105<br>TTTCCTCTAAACTGTCATTGAAGTGGGATTCTATAGGAGGGGAAATGTTCCGCATT<br>CCTCTAATCTGCTATATAAGTGGGTTCTATAGCAGAGGTAATGTTCCGC                                                                                                                                                                                                                                                                                          |
| TdelSat136-61  | 0.002 | 1.46 | 0.64 | OQ082212 | >TdelSat136-61<br>TATGTGGACAAAATATTTATAGCAAGTGACGTGTGTAGTATGCTAGTGTGTAACGT<br>AAAGG                                                                                                                                                                                                                                                                                                                                       |
| TdelSat137-183 | 0.002 | 7.1  | 0.69 | OQ082213 | >TdelSat137-183<br>TTTTCTACACTTTTACTAAAAATACTGGCATATTTCTACACTTTTACAGAAGGCAC<br>CTACATGTTTCTACATTTATACTTATACCTATTACATATTTCTTCAATTTTACAGAG<br>GACACCTGCATATTTCTACACATTACAGGGCATATATATATTTCTATACTTTTACA<br>GAGGACACCTGCAT                                                                                                                                                                                                    |
| TdelSat138-63  | 0.002 | 3    | 0.75 | OQ082214 | >TdelSat138-63<br>CAGCAATAAGAGAAAAGTAAAAAAGAAGAAAATTTGCCATTTTACATATAATTATT<br>GCCACTAA                                                                                                                                                                                                                                                                                                                                    |
| TdelSat139-152 | 0.002 | 0.73 | 0.66 | OQ082215 | >TdelSat139-152<br>ATTCTAGTTTTAAGAAAATTTGTCAGTAATAATGACTGTATTGACTGCAATAAAG<br>TCAATCCAGGACTGTATTTATGAAGTCCCTCGAATGTAAATAACTAAAATCATGA<br>ACCCAACAGTGTGTTGTTAGGCCGACTAACCGTGAAAATAA                                                                                                                                                                                                                                        |
| TdelSat140-68  | 0.002 | 0.99 | 0.60 | OQ082216 | >TdelSat140-68<br>AAGTAATTTTTTCATTGTAACCACTGTGTCTCAGACAAACTGCGTCACTCGGAGTAA<br>GGGGACTTTAAT                                                                                                                                                                                                                                                                                                                               |
| TdelSat141-369 | 0.002 | 6.38 | 0.69 | OQ082217 | >TdelSat141-369<br>TCCTGACGCAAAACATACCATACAGTATCATTTCCCAGAGTAGAATAGAAACAA<br>GATATGGGGTTCAGTATTAGTCAGTTTGAGAAACAGTGATGAAAACGAAGAAATT<br>CGCTACTTCTTACCAAAAAATTTTACAGAACAAATCACTGATGACGTAATTAAGG<br>ATTATAAGAATAATAAACCATCACCTATCACATATCTATAGGAGGTTGAACCTA<br>ATAAATCTTTTAATATTCATTTTCGCCTAATGGGACACATGACCTTGATGAGTATGT<br>ATGTTTTAAAGTTAAATGTACATAACTGATGAAGATTTTTATGTCCTGAATGTG<br>CGCAACCATTAGAATTAGAGGACAAATTAATATAAAA |
| TdelSat142-23  | 0.002 | 6.6  | 0.65 | OQ082218 | >TdelSat142-23<br>TACACACATTGACAGTCTATACT                                                                                                                                                                                                                                                                                                                                                                                 |
| TdelSat143-52  | 0.002 | 2.04 | 0.67 | OQ082219 | >TdelSat143-52<br>CTTTCTAATACTCACCAACTGAGAATTGCAAAAGTTGTAAATCTCGTTGTTA                                                                                                                                                                                                                                                                                                                                                    |

|                |       |      |      |          |                                                                                                                                                                                                                                                                                                     |
|----------------|-------|------|------|----------|-----------------------------------------------------------------------------------------------------------------------------------------------------------------------------------------------------------------------------------------------------------------------------------------------------|
| TdelSat144-121 | 0.002 | 0.23 | 0.69 | OQ082220 | >TdelSat144-121<br>GTATACTTGTTTTTCGAGCCCAATGAGTATAAAAAAAAAATTGCTGATGTTCTGCTGACATCTAGACGGACATTCTCTTAACTAAAACAGTTATATATATAAAATGAGAAATTTTCATGCC                                                                                                                                                        |
| TdelSat145-36  | 0.002 | 5.61 | 0.75 | OQ082221 | >TdelSat145-36<br>TGTACTACTTATAGGGAACAAATGAAATACTATTTA                                                                                                                                                                                                                                              |
| TdelSat146-62  | 0.002 | 1.73 | 0.74 | OQ082222 | >TdelSat146-62<br>ATCATTTAGAGATAACATGTTACTGTCAGTTACGAACCAATAGAAATAAACAAATTAAAACT                                                                                                                                                                                                                    |
| TdelSat147-275 | 0.002 | 3.74 | 0.73 | OQ082223 | >TdelSat147-275<br>CTGGCTGTTAATAAGGTTCACAATTTATACACTCTAATTATTGATATGCAGCCAATAAATTCCTTGTGAACTAAAAAATTATCATCATGTTGGGACCAAGACACCAAAAATAGATCTACAAAGAAGATTCAAGTTACTAAAAATGGAAATATTCACCACTATACATAATTCAGTGATTGTAACCCCTTGATAAGAACACGTGAAGTGTTGAAACGTTGGTTTGTTAAAAAGATAATAATGTAAAAATTATAAATTAATAAATATAAATTCAT |
| TdelSat148-53  | 0.001 | 7.71 | 0.62 | OQ082224 | >TdelSat148-53<br>CAGTAAGAGAAAGTGGGAAATGTATCACATTTCAGTTGGCAAGAACTAAATTG                                                                                                                                                                                                                             |
| TdelSat149-26  | 0.001 | 4.79 | 0.58 | OQ082225 | >TdelSat149-26<br>ATAGTGGGTAACAGTGCTACACATGT                                                                                                                                                                                                                                                        |
| TdelSat150-56  | 0.001 | 0.06 | 0.66 | OQ082226 | >TdelSat150-56<br>TGTTGAGGTTGGTTTGCCCTCTACTAACTATGCAAATATAACATATTGTAAAAATGGG                                                                                                                                                                                                                        |
| TdelSat151-149 | 0.001 | 0.52 | 0.70 | OQ082227 | >TdelSat151-149<br>GTTTAGTTTATAAAGGGCACTGTTTAGTAATACCTAGCAAATTTTAAAGGAATATTACAAAACGGATGTGGCCTCTTAAAACCAAAATTGTAAATGTAAAACCCCAGCCTTACAATAAAGGTGAGAAATGAAATTAATATTATCAATG                                                                                                                             |
| TdelSat152-50  | 0.001 | 0.65 | 0.76 | OQ082228 | >TdelSat152-50<br>AATTAATAAACTAGACATATACTTGTAGAATTCACCATTGTACTTAC                                                                                                                                                                                                                                   |
| TdelSat153-75  | 0.001 | 1.86 | 0.47 | OQ082229 | >TdelSat153-75<br>ACAAGTGGGCACTCACCTTGCCACGTAGAGATGTTGGTTAGTACCTAGCCAGGCCTTAGTAGAAGTGTAGCC                                                                                                                                                                                                          |
| TdelSat154-45  | 0.001 | 1.67 | 0.62 | OQ082230 | >TdelSat154-45<br>CCATATAATGTTGGGTACTATACCTTTATGGTGTAGACACCTTCA                                                                                                                                                                                                                                     |
| TdelSat155-89  | 0.001 | 2.24 | 0.62 | OQ082231 | >TdelSat155-89<br>ACCAGACCAAAAAGATATTCTTCTCCATAAAAAAATACTCCACATATGCTTCCCTCACGACCTAAGATAATTCACCTCTGGACCGCT                                                                                                                                                                                           |

|                |               |      |      |          |                                                                                                                                                                                                                                                                                     |
|----------------|---------------|------|------|----------|-------------------------------------------------------------------------------------------------------------------------------------------------------------------------------------------------------------------------------------------------------------------------------------|
| TdelSat156-78  | 0.001         | 1.6  | 0.67 | OQ082232 | >TdelSat156-78<br>GGAAAATTTTGTGAAATTTACTGCATCAAATCTTTATTTCTTACTTCTTCCAAGG<br>ATCCACTAAGGCTCTCAGTCA                                                                                                                                                                                  |
| TdelSat157-51  | 0.001         | 5.78 | 0.75 | OQ082233 | >TdelSat157-51<br>GACAATACTGAAATATATATCGCTAGTAAATGGCAAATCTAAAGTTATAAA                                                                                                                                                                                                               |
| TdelSat158-134 | 0.001         | 5.99 | 0.67 | OQ082234 | >TdelSat158-134<br>ACTTCAATTTGCATGTTTGAAGATAATTTACCAATTGGAATGTTAATAGTTGAAGT<br>AAGAGAGATTACTGGGGATGCTTCAAACTGATTTGCTTTCTATTACTATAGTCT<br>CTATGTGTGAGAACTAACTGTG                                                                                                                     |
| TdelSat159-241 | 0.001         | 7.38 | 0.75 | OQ082235 | >TdelSat159-241<br>AATGTATTGATAATGAATTTCTAAACGAAAATTCAACAATAAACGTGTTAGGATT<br>TACGGCAAATATTTTACAATTAAATGCAACACGAAATCCAACAAAATTCAATAAT<br>TCTGTTTACAACGAAACAGACAAAATACATTAGATTTACGGCAAATATTTAACA<br>AAAATGTATAGCAAATAAATGCAACACGAAATCTAACAAAAGAATTAATAATTC<br>TGTTTACAACGAAACAGACAAA |
| TdelSat160-49  | 0.001         | 6.31 | 0.84 | OQ082236 | >TdelSat160-49<br>TAATGACGTTCTTGATATAAATACAATATTTTAAAATTGAATAAAATTC                                                                                                                                                                                                                 |
| <b>TOTAL</b>   | <b>53.920</b> |      |      |          |                                                                                                                                                                                                                                                                                     |
