# Supplementary material for: Making the Genome Huge: The Case of Triatoma delpontei, a Triatominae Species with More than 50% of Its Genome Full of Satellite DNA
Source: MDPI journal article supplement (doi:10.3390/genes14020371), 2023-01-31
Supplement: s1 [file s1]

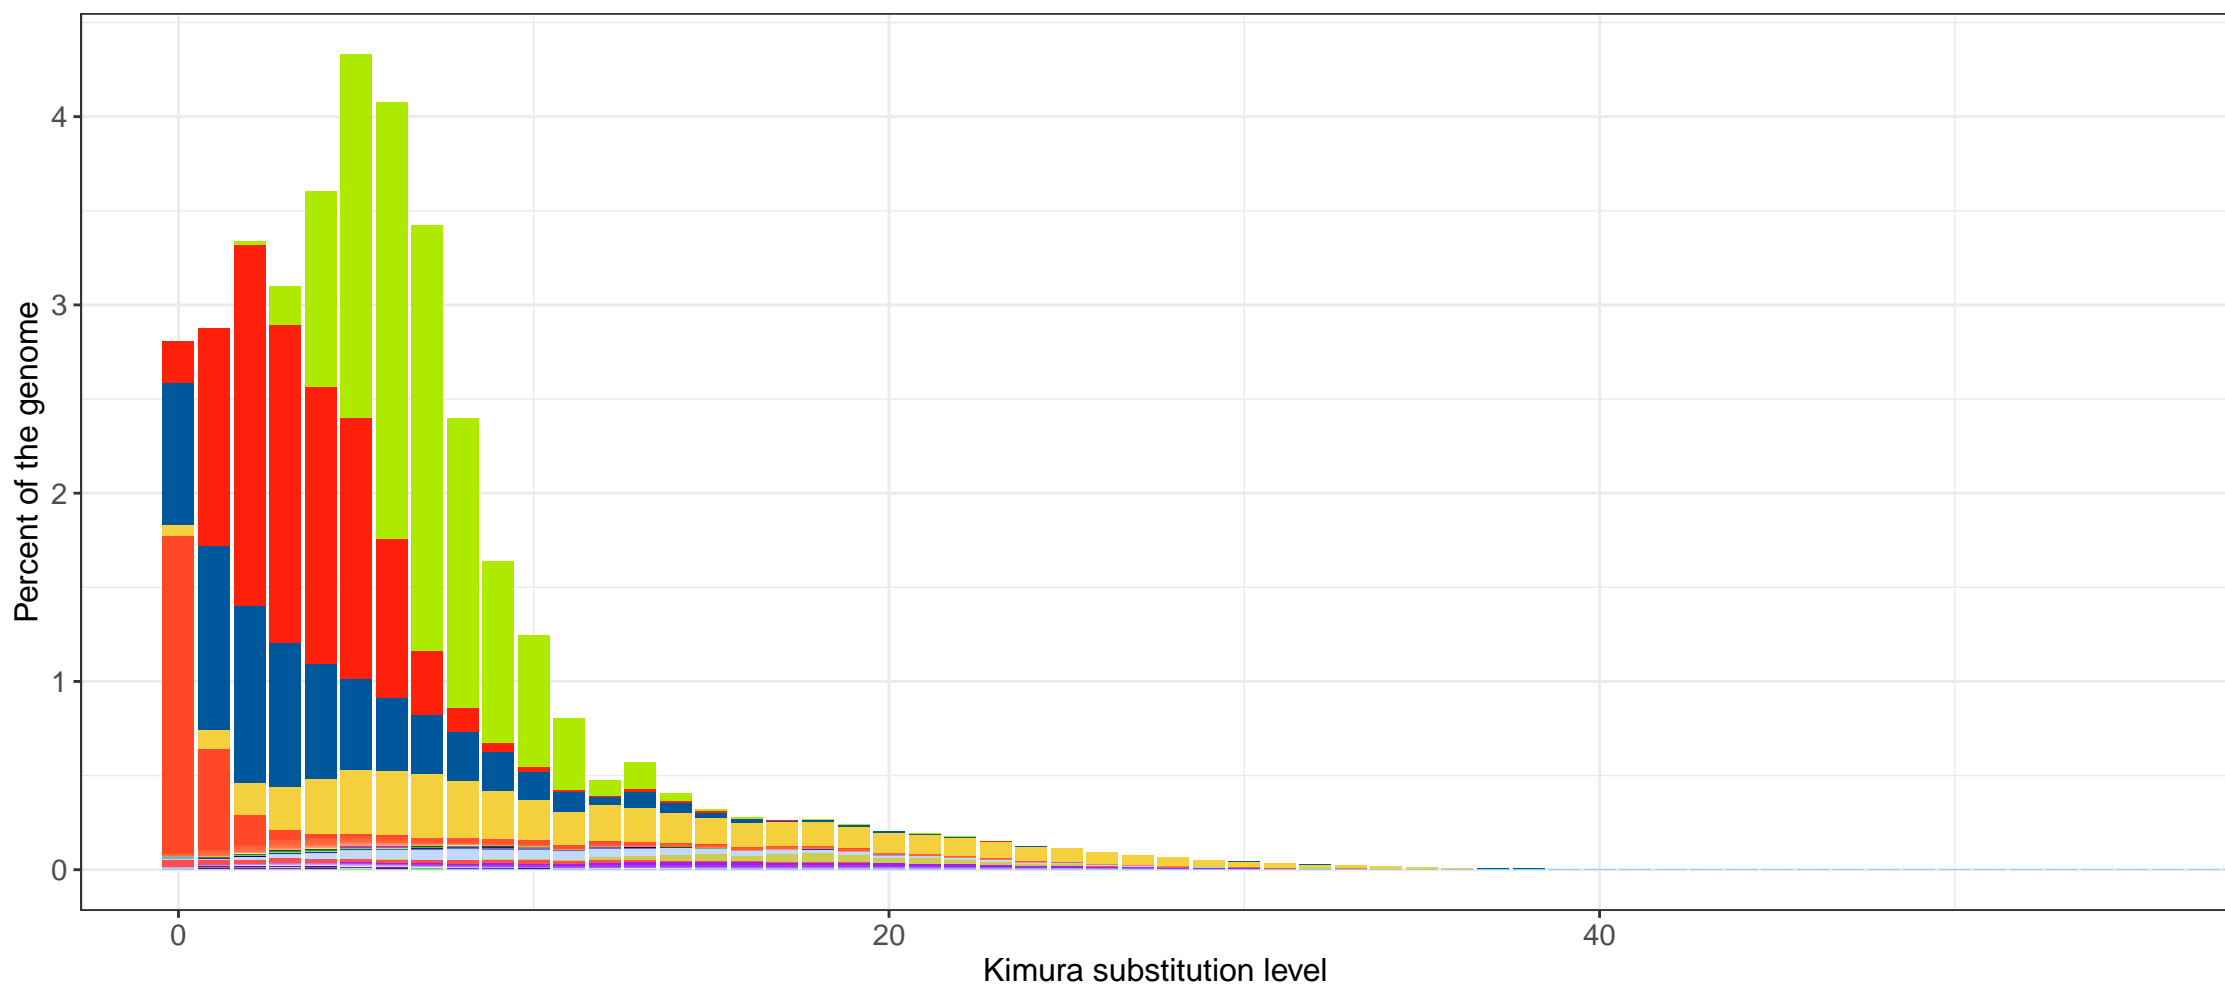

|                |                 |               |               |               |
|----------------|-----------------|---------------|---------------|---------------|
| TinfSat01.33   | TinfSat21.38    | TinfSat41.101 | TinfSat61.89  | TinfSat81.51  |
| TinfSat02.79   | TinfSat22.64    | TinfSat42.112 | TinfSat62.120 | TinfSat82.207 |
| TinfSat03.4    | TinfSat23.51    | TinfSat43.242 | TinfSat63.237 | TinfSat83.235 |
| TinfSat04.1000 | TinfSat24.112   | TinfSat44.8   | TinfSat64.88  | TinfSat84.379 |
| TinfSat05.4    | TinfSat25.62    | TinfSat45.94  | TinfSat65.103 | TinfSat85.83  |
| TinfSat06.181  | TinfSat26.53    | TinfSat46.131 | TinfSat66.161 | TinfSat86.114 |
| TinfSat07.10   | TinfSat27.47    | TinfSat47.87  | TinfSat67.114 | TinfSat87.98  |
| TinfSat08.239  | TinfSat28.46    | TinfSat48.120 | TinfSat68.136 | TinfSat88.121 |
| TinfSat09.113  | TinfSat29.87    | TinfSat49.94  | TinfSat69.58  | TinfSat89.49  |
| TinfSat10.53   | TinfSat30.58    | TinfSat50.63  | TinfSat70.170 | TinfSat90.29  |
| TinfSat11.85   | TinfSat31.71    | TinfSat51.137 | TinfSat71.99  | TinfSat91.238 |
| TinfSat12.84   | TinfSat32.52    | TinfSat52.334 | TinfSat72.49  | TinfSat92.61  |
| TinfSat13.147  | TinfSat33.372   | TinfSat53.128 | TinfSat73.44  | TinfSat93.102 |
| TinfSat14.147  | TinfSat34.28    | TinfSat54.128 | TinfSat74.147 | TinfSat94.89  |
| TinfSat15.99   | TinfSat35.35    | TinfSat55.89  | TinfSat75.167 | TinfSat95.7   |
| TinfSat16.49   | TinfSat36.10    | TinfSat56.118 | TinfSat76.70  | TinfSat96.101 |
| TinfSat17.118  | TinfSat37.314   | TinfSat57.164 | TinfSat77.133 |               |
| TinfSat18.102  | TinfSat38.315   | TinfSat58.96  | TinfSat78.348 |               |
| TinfSat19.104  | TinfSat39.5.Tel | TinfSat59.132 | TinfSat79.72  |               |
| TinfSat20.46   | TinfSat40.73    | TinfSat60.33  | TinfSat80.61  |               |

# *Triatoma infestans* Andean

Percent of the genome

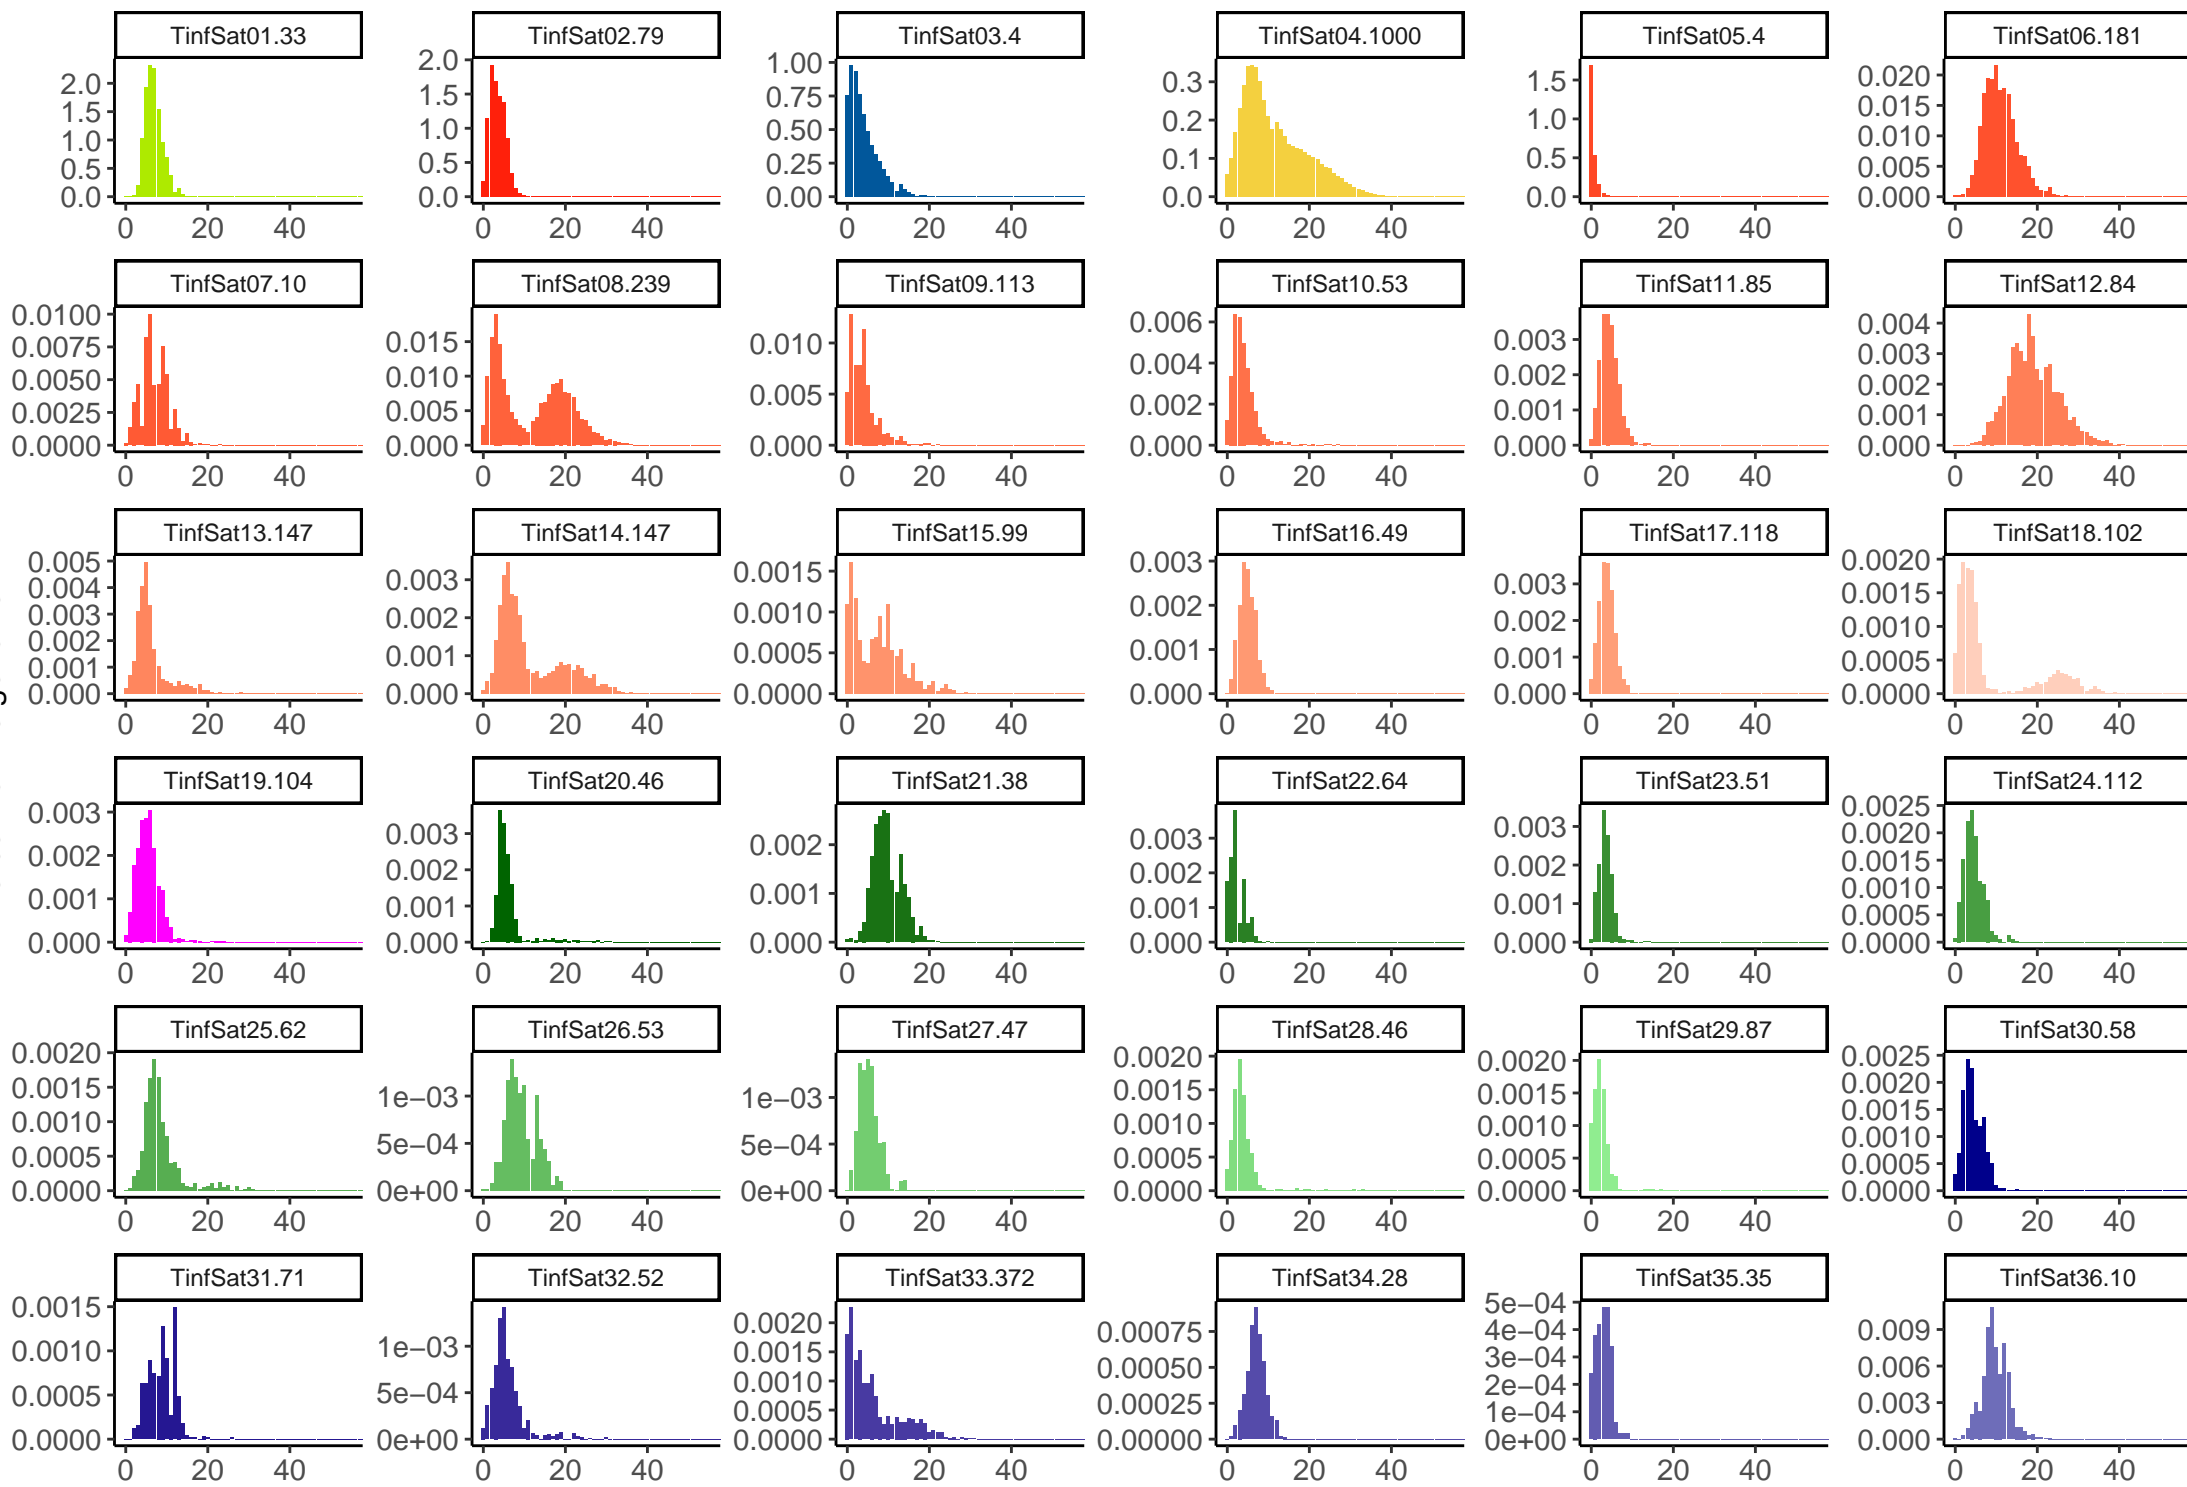

Kimura substitution level

# Triatoma infestans Andean

Percent of the genome

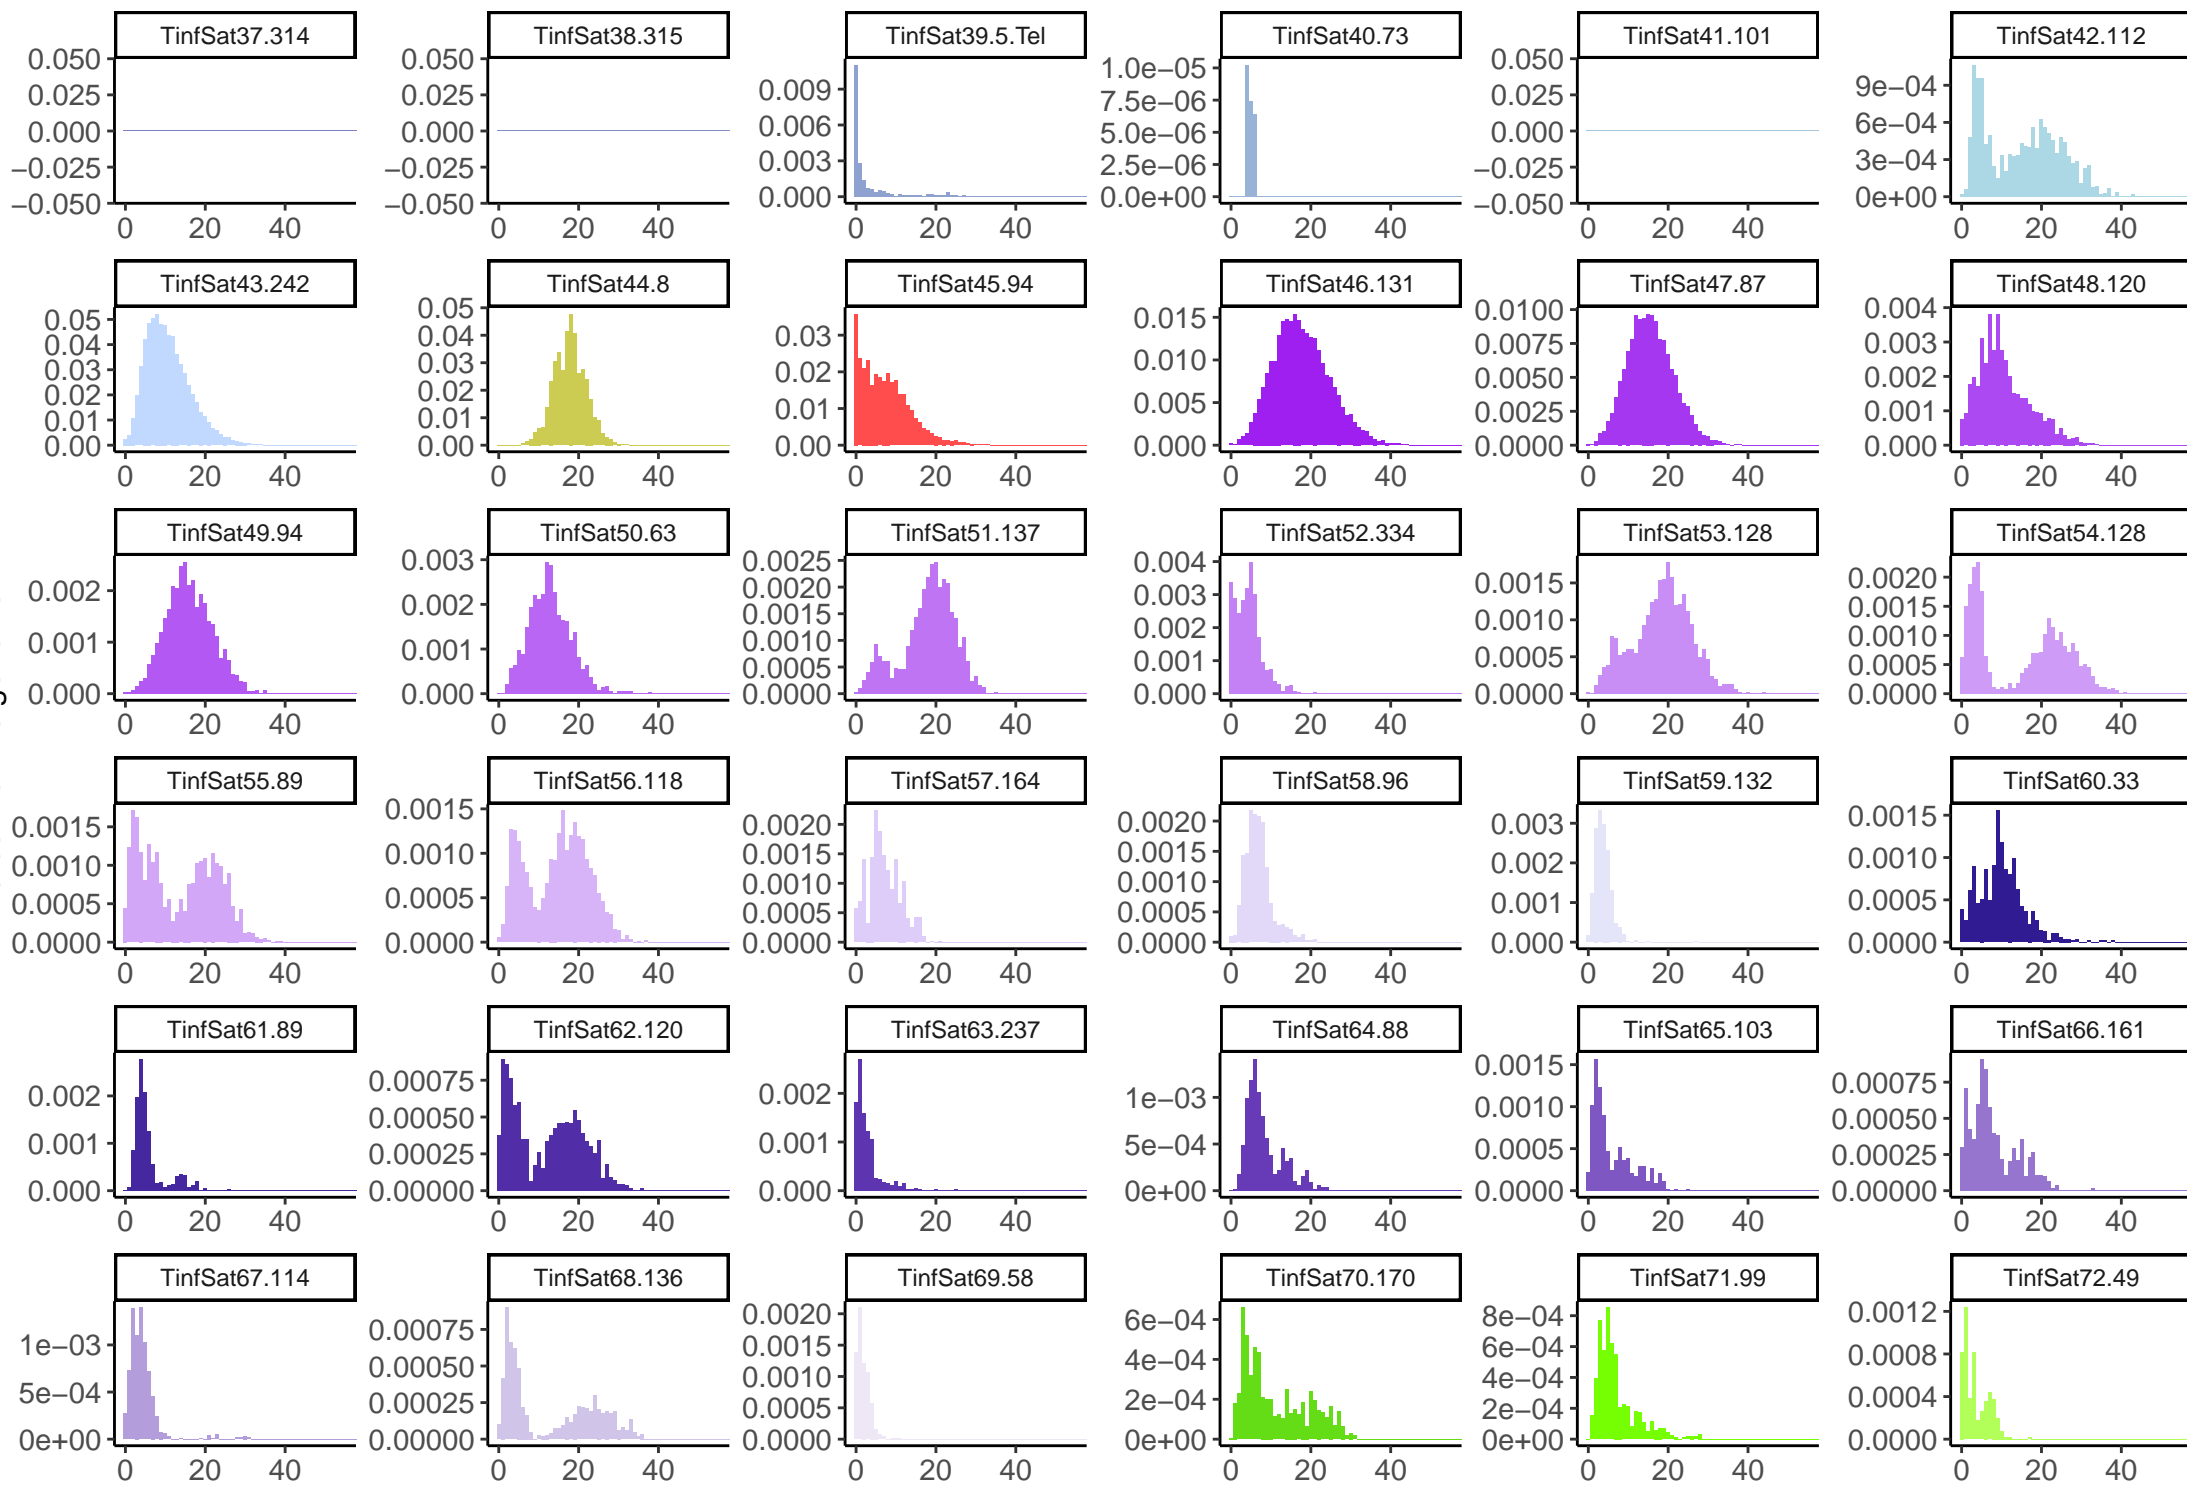

Kimura substitution level

# *Triatoma infestans* Andean

Percent of the genome

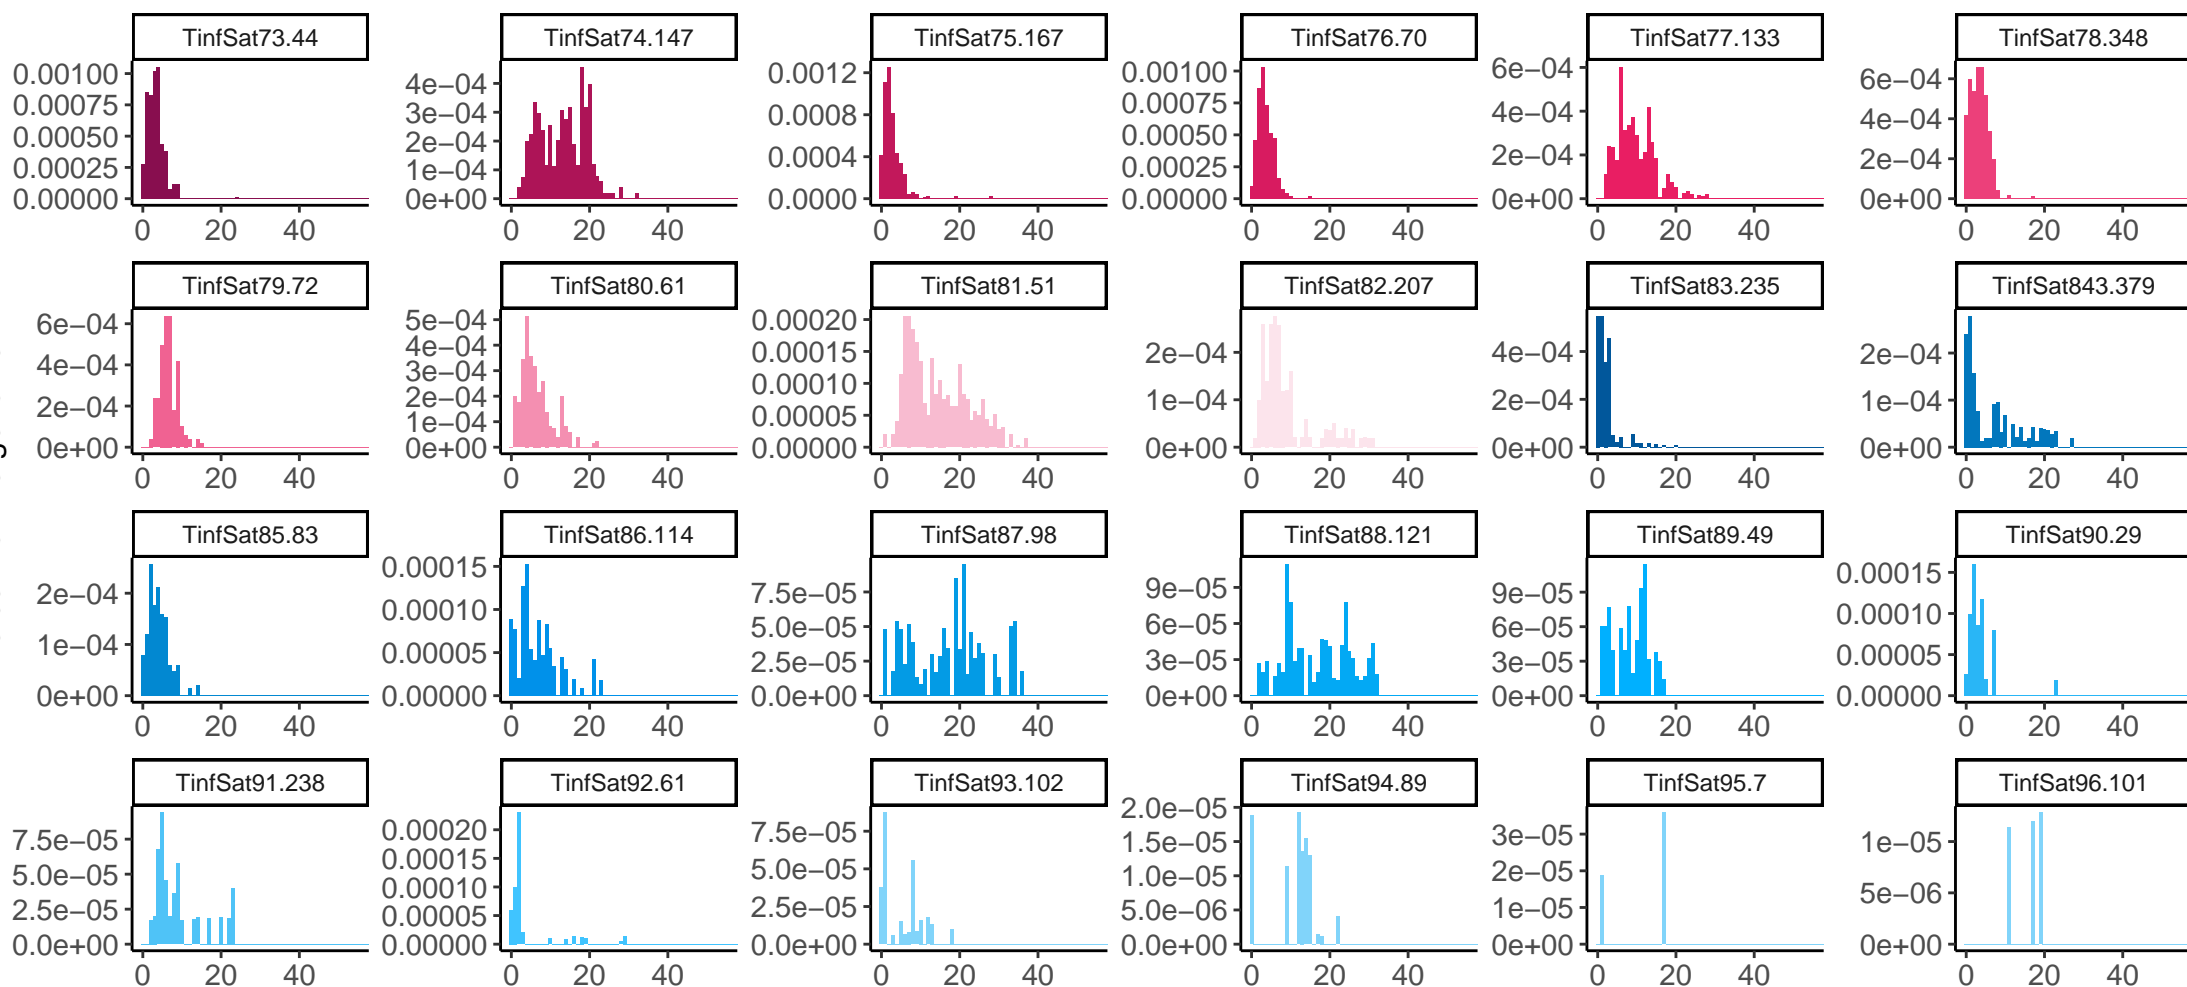

Kimura substitution level
