# Supplementary material for: Making the Genome Huge: The Case of Triatoma delpontei, a Triatominae Species with More than 50% of Its Genome Full of Satellite DNA
Source: MDPI journal article supplement (doi:10.3390/genes14020371), 2023-01-31
Supplement: s1 [file s1]

**Figure S1.** Alignments of the consensus sequences between different satDNA families of *Triatoma delpontei*. The regions with the highest similarity are marked.

### TdelSat05-1000 vs TdelSat23-112, TdelSat12-52, TdelSat51-46

|                |                                                                      |      |
|----------------|----------------------------------------------------------------------|------|
| TdelSat05-1000 | ATCGTCGGAGCCATTTTGGAGAAATCGCAAAAAAGTAAAAAAAACAACCTAGTAAAGTG          | 60   |
| TdelSat05-1000 | GTACTTCCGGTTGAGGAATTTTGACAGATAACGTACTGTCA                            | 120  |
| TdelSat23-112  | GATCCCATGGTGATACCTA<br>GAACCCACGGTGATATCTA<br>** **                  | 19   |
| TdelSat05-1000 | AACGGAATATCAAGTTTCAACTTTCTACGGTTTTTCGTTTTTGAGCTATGCTGTTACACAT        | 180  |
| TdelSat23-112  | AACAGAAATGTCAGTTTGAATTTTCTGCGATTTTGTGTTTTGTTGTGGTTGTGTTGTTC<br>** ** | 79   |
| TdelSat05-1000 | ACATACATACACACACACACACACACACACACACCATTTGCTAAAAACCACTTTTTTGGACTCAGG   | 240  |
| TdelSat23-112  | CGGTTGTGGAATTTTGACAGATAACTTAGTGTC<br>* * * *                         | 112  |
| TdelSat05-1000 | GGACCTCAAAACGGATATTTCCGGTGAAAACCTCGATATCGAAAATTTGACACGATTACAA        | 300  |
| TdelSat05-1000 | TACTTCCTCTTACTAGGAGTAAGAGAAAGTAAAAAAA                                | 360  |
| TdelSat12-52   | AAATCTGGTGTGAAACACTCA<br>ATATAATCTGATGT--GTAATCA<br>* * **           | 22   |
| TdelSat05-1000 | CACAACCTTCTCTTACTCCAGTTCTCAAATTTATAATGACAAATTTTATAGTTTGTGTA          | 420  |
| TdelSat12-52   | CACGACTTCTCTTGTGCTGTAGGAGGTG<br>** **                                | 52   |
| TdelSat05-1000 | CCAAATTTAATGAAATTCGTCGAAAACCTGAAAAAACTGTTTCAAGTAAAGCGCACTTCCG        | 480  |
| TdelSat05-1000 | GTTTACTAATTTTCTTGAAACTCGGAATTTTGGCCATCTATTTATTTCTAATTAATTTTG         | 540  |
| TdelSat05-1000 | TTTGATGATAGAAATGTATAATCAACTATGATAGCACTTTAGAGAAAAACATAACCCCA          | 600  |
| TdelSat05-1000 | CCCTCCCTTAAAGTGCCTTAAATGAATTTTCCAGAGAAATGTTTAAATAAAAGTT              | 660  |
| TdelSat05-1000 | GTAGATCTTTGTATGTGTAGTTTATATACGAAGTTTCAAGAAAATCGTCGGAGCCATTTT         | 720  |
| TdelSat05-1000 | TGAGAAAATCGCGAAAAGTGAAAAAATCATTTAGTAAAGTGGTAAAGTAAACGCACTT           | 780  |
| TdelSat05-1000 | CCGGTTATCCGATTTTTCAAACTCGGAATTTCAACAACATATTTAATTTCAATTAACA           | 840  |
| TdelSat05-1000 | TTATTTAGATGACAGAATTTGTCTAATAAACTGAAATAGCACTTTAGATGAAAACCTAAC         | 900  |
| TdelSat05-1000 | CCACCCCTCCCCAAAAGTGCCTTAAATGAATTTTCCCGGAGAAATGTTTC                   | 960  |
| TdelSat51-46   | AAATAAAA<br>CCGATACAGAAAGTGT<br>** * *                               | 31   |
| TdelSat05-1000 | GTGTAGCTCTTTGTATGTGTAGTTGATATACCAAGTTTAAAGAAA                        | 1006 |
| TdelSat51-46   | GTGTGCTCTTTGTATGTACAG<br>*****                                       | 46   |

### TdelSat05-1000 vs TdelSat70-86, TdelSat29-137

|                |                                                                        |     |
|----------------|------------------------------------------------------------------------|-----|
| TdelSat05-1000 | ATCGTCGGAGCCATTTTGGAGAAATCGCAAAAAAGTAAAAAAAACAACCTAGTAAAGTG            | 60  |
| TdelSat05-1000 | GTACTTCCGGTTGAGGAATTTTGACAGATAACGTACTGTGATCCCATG                       | 120 |
| TdelSat70-86   | GTACCACTGCTTCTAACGACGGAAGTTAGTGGCAGTTTGTGATACCTA<br>* * * *            | 52  |
| TdelSat05-1000 | AACGGAATATCAA                                                          | 180 |
| TdelSat70-86   | ACTTGGTATTTCCGTTTATGTA<br>*****                                        | 86  |
| TdelSat05-1000 | ACATACATACACACACACACACACACACACACACCATTTGCTAAAAACCACTTTTTTGGACTCAGG     | 240 |
| TdelSat05-1000 | GGACCTCAAAACGGATAT--TTCCGGTGAAAACCTCGATATCGAAAATTTGACACGATTAC          | 298 |
| TdelSat29-137  | CTACAATGAGATATATATAAAGTGACGAATTTACTT--TAACTT--CCAATTTT<br>* * * *      | 51  |
| TdelSat05-1000 | AATACTTCCTCTTACTAGGAGTAAGAGAAAGTAAAAAAAATCTGGTGTGAAACACT               | 358 |
| TdelSat29-137  | ACTCATTTGTCTTAACATATAGTTTGTGTAGTTAGGAGGGGGAGGTGGTGGGGGACACT<br>* * * * | 111 |
| TdelSat05-1000 | CACACAACCTTCTCTTACTCCAGTTCTCAAAATTTATAATGACAAATTTTATAGTTTGTG           | 418 |
| TdelSat29-137  | CACACGACTTCTCTTACTCCTGTTA<br>*****                                     | 137 |
| TdelSat05-1000 | CGGTTTACTAATTTTCTTGAAACTCGGAATTTTGGCCATCTATTTATTTCTAATTAATTT           | 538 |
| TdelSat05-1000 | TGTTTGGATGATAGAAATGTATAATCAACTATGATAGCACTTTAGAGAAAAACATAACCC           | 598 |
| TdelSat05-1000 | CACCCCTCCCTTAAAGTGCCTTAAATGAATTTTCCAGAGAAATGTTTAAATAAAAG               | 658 |
| TdelSat05-1000 | TTGTAGATCTTTGTATGTGTAGTTTATATACGAAGTTTCAAGAAAATCGTCGGAGCCATT           | 718 |
| TdelSat05-1000 | TTTGAGAAAATCGCGAAAAGTGAAAAAATCATTTAGTAAAGTGGTAAAGTAAACGCAC             | 778 |
| TdelSat05-1000 | TTCCGGTTATCCGATTTTTCAAACTCGGAATTTCAACAACATATTTAATTTCAATTA              | 838 |
| TdelSat05-1000 | CATTAATTTAGATGACAGAATTTGTCTAATAAACTGAAATAGCACTTTAGATGAAAACCTAA         | 898 |

## TdelSat05-1000 vs TdelSat43-111

|                |                                                                |      |
|----------------|----------------------------------------------------------------|------|
| TdelSat05-1000 | GTCTACTAATTTTCTTGAAACTCGGAATTTTGGCCATCTATTTTATTTCTAATTAATTTTG  | 540  |
| TdelSat05-1000 | TTTGGATGATAGAAATGTGATAATCAACTATGATAGCACTTTAGAGAAAAACATAAACCCCA | 600  |
| TdelSat05-1000 | CCCCCCCCCTTAAAGTCGCCCTTAAATGAATTTTCCGAGAAATGTTTAAATAAAGGCTT    | 660  |
| TdelSat05-1000 | GTAGATCTTTGTATGTGTAGTTTATATACGAAGTTTCAAGAAATCGTCGGAGCCATTTT    | 720  |
| TdelSat05-1000 | TGAGAAAAATCGCGAAAAAGTGAAAAAAATCATTTAGTAAAGTGGTAAAGTAAACGCACCTT | 780  |
| TdelSat05-1000 | CCGGTATTCGGAATTTTTTCAAACTCGGAATTTCAACAACATATTTAATTCATTAACA     | 840  |
| TdelSat05-1000 | TTAATTTAGATGACAGAATGTGCTTAATAAATCGAATAGCACTTTAGATGAAACCTTAACC  | 900  |
| TdelSat05-1000 | CCACCCCTCCCCCAAAGTCGCCCTTAAATGAATTTTCCCGGAGAAATGTTTCAAATAAAA   | 960  |
| TdelSat05-1000 | GTGTAGCTCTTTGTATGTGTAGTTGATATACCAAGTTTAAAGAAA                  | 1006 |

## TdelSat05-1000 vs TdelSat48-118

|                |                                                                 |      |
|----------------|-----------------------------------------------------------------|------|
| TdelSat05-1000 | CCAAATTATTAATGAAATTCGTCGAAAAC TGAAAAAACTGTTCAAGTAAAAGCGCACTTCCG | 480  |
| TdelSat05-1000 | GTTTTCACTAAATTTCTTGAAACTCGGAATTTGGCCATCTATTTATTTCTAAATTAATTTTG  | 540  |
| TdelSat05-1000 | TTTGGATGATGAGAATGTATAATCACTATGATAGCACTTTAGAGAAAAACATACCCCA      | 600  |
| TdelSat05-1000 | CCCCCTCCCCTAAAAGTGCCCTTAAATGAATTTTCCCAGAGAAATGTTTTAAATAAAAGTT   | 660  |
| TdelSat05-1000 | GTAGATCTCTTGATATGTGTAGTTTATATACGAAGTTTCAAGAAAATCGCTCGGAGCACTTTT | 720  |
| TdelSat05-1000 | TGAGAAAAATCGCGAAAAGTGAAAAAAATCACTTAGTAAAGTGGTAAATCAACGCATTT     | 780  |
| TdelSat05-1000 | CCGGTTATCCGATTTTTTTCAAAC TCGGAATTTCAACAACATATTTAAATCTAATTAAACA  | 840  |
| TdelSat05-1000 | TTAATTTAGATGACAGAATTTGTCTAATAAATCGAATAGCACTTTAGATGAAAACCTTAACC  | 900  |
| TdelSat05-1000 | CCACCCCTCCCCCAAAGTGCCCTTAAATGAATTTTCCCGGAGAAATGTTTCAAATAAAA     | 960  |
| TdelSat05-1000 | GTGTAGACTCTTTGTATGTGTAGTTTGATATACCAAGTTTAAAGAAA                 | 1006 |

## TdelSat05-1000 vs TdelSat57-271

|                |                                                             |     |
|----------------|-------------------------------------------------------------|-----|
| TdelSat05-1000 | CACA-----ACTTTCCTCTACTCCAGTTCTCAAATAATGACAAAATTTTATAGTT     | 414 |
| TdelSat57-271  | GTGGGCCGAGAAGAGTGTCGAATAACATCTCAACCATCA-----AGCCCATAAAAAATT | 128 |
|                | * * * * *                                                   |     |
|                | * * * * *                                                   |     |
|                | * * * * *                                                   |     |
|                | * * * * *                                                   |     |

|                |                                                                                                                  |     |
|----------------|------------------------------------------------------------------------------------------------------------------|-----|
| TdelSat05-1000 | TGTGTACCAAAATTTAATGAAATTCGTGCGAAACTGAAAAAACTGTTTCAGTAAAAGCGCA                                                    | 474 |
| TdelSat57-271  | TGAATTTCA-----<br>** * **                                                                                        | 137 |
| TdelSat05-1000 | CTTCCGGTTTACTAATTTTCTTGAAACTCGGAATTTTGCCATCTATTTATTTCTAATTA                                                      | 534 |
| TdelSat05-1000 | ATTTTGTTTGGATGATAGAATTGTATAATCAACTATGATAGCACTTTAGAGAAAAACATA                                                     | 594 |
| TdelSat05-1000 | ACCCACCCCTCCCTAAAAGTGCCCTTAAATGAATTTTCC-CAGAGAAATGTTTTAAAT                                                       | 653 |
| TdelSat57-271  | ACGCTACAGATTCGCGAAAACTACATTAATAATCCATGTTTTCAAAAAAATTTACAAAT<br>** * ** * ** * ** * ** * ** * ** * ** * ** * ** * | 197 |
| TdelSat05-1000 | AAAA-GTTGT-AGATCTTTGTATGTGTAGTTTATATACGAAAGTTTCAAGAAAATCGTCGG                                                    | 711 |
| TdelSat57-271  | AAAAAGTGAAGGGATTTTATATGTGTAGATAGTATACAAAATTTGAAGCC-----<br>**** * * ** * **** * * **** * * *                     | 249 |
| TdelSat05-1000 | AGCCATTTTTGAGAAAATCGCGAAAAGTGAAAAAATCATTTAGTAAAGTGGTAAAGTA                                                       | 771 |
| TdelSat57-271  | --ATTCTTTGAGGAAATCGCAAAA<br>* **** * **** *                                                                      | 271 |
| TdelSat05-1000 | AACGCACTTCGGTTATCCGATTTTTTTCAAACCTCGGAATTTCAACAACATATTTAATTC                                                     | 831 |
| TdelSat05-1000 | TAATTAACATTATTTAGATGACAGAATTGTCTAATAAACTGAAATAGCACTTTAGATGAA                                                     | 891 |
| TdelSat05-1000 | AACCTAACCCACCCCTCCCCCAAAGTGCCCTTAAATGAATTTTCCGGAGAAATGTTT                                                        | 951 |
| TdelSat05-1000 | CAAATAAAAGTTGTAGCTCTTTGTATGTGTAGTTGATATACCAAGTTTAAAGAAA 1006                                                     |     |

## TdelSat05-1000 vs TdelSat74-137

|                |                                                                                                         |     |
|----------------|---------------------------------------------------------------------------------------------------------|-----|
| TdelSat05-1000 | ATCGTCGGAGCCATTTTTTGAGAAAATCGCAAAAAAGTAAAAAAAACAAC TAGTAAAGTG                                           | 60  |
| TdelSat05-1000 | GTACTTCCGGTTGAGGAATTTTGACAGATAACGTACTGTGTCAGATCCCATGGTGATACCTA                                          | 120 |
| TdelSat05-1000 | AACGGAATATCAAGTTTCAACTTTCTACGGTTTTTCGTTTTTGAGCTATGCTGTTTCACAT                                           | 180 |
| TdelSat05-1000 | ACATACATACACACACACACACACACCATTTGCTAAAAACCCTTTTTTGG- ACTCAG                                              | 239 |
| TdelSat74-137  | TCAATATATGATGGTCG<br>* * * * *                                                                          | 19  |
| TdelSat05-1000 | GGGACCTCAAAACGGATATTTCCGGTGAAACTCGATATCGAAAATTTGACACGATTACA                                             | 299 |
| TdelSat74-137  | GGCT-----ACAGAT-TCTGTAAAAATTCATGATGAAGAAAATTTGTCCCGTCGCA<br>** * * * * * * * * * *                      | 71  |
| TdelSat05-1000 | ATACTTCCTCTTACTAGGAGTAAGAGAAAAGTAAAAAATAAAAAATCTGGTGTGAAACACTC                                          | 359 |
| TdelSat74-137  | AGTTTCCTCTTACGAGGAGTAAAAGGAAATAAAAAACTAATAATGTACAATTATGGCCC<br>* **** * * * * * * * * * * * * * * * * * | 131 |
| TdelSat05-1000 | ACACAACTTTCTCTTACTCCAGTTCTCAAAATTATAATTGACAAATTTTATAGTTTGTGT                                            | 419 |
| TdelSat74-137  | CCCCCA<br>* * *                                                                                         | 137 |
| TdelSat05-1000 | ACCAAATTTAATGAAATTCGTGCGAAACTGAAAAAACTGTTTCAGTAAAAGCGCACTTCC                                            | 479 |
| TdelSat05-1000 | GGTTTACTAATTTTCTTGAAACTCGGAATTTTGCCATCTATTTATTTCTAATTAATTTT                                             | 539 |
| TdelSat05-1000 | GTTTGGATGATAGAATTGTATAATCAACTATGATAGCACTTTAGAGAAAAACATAACCCC                                            | 599 |
| TdelSat05-1000 | ACCCCTCCCTAAAAGTGCCCTTAAATGAATTTTCCAGAGAAATGTTTTAAATAAAAGT                                              | 659 |
| TdelSat05-1000 | TGTAGATCTTTGTATGTGTAGTTTATATACGAAGTTTCAAGAAAATCGTCGGAGCCATTT                                            | 719 |
| TdelSat05-1000 | TTGAGAAAATCGCGAAAAAGTGAAAAAATCATTTAGTAAAGTGGTAAAGTAAACGCACT                                             | 779 |
| TdelSat05-1000 | TCCGGTTATCCGATTTTTTTCAAACCTCGGAATTTCAACAACATATTTAATTTCTAATTAAC                                          | 839 |
| TdelSat05-1000 | ATTATTTAGATGACAGAATTGTCTAATAAACTGAAATAGCACTTTAGATGAAAACCTAAC                                            | 899 |
| TdelSat05-1000 | CCACCCCTCCCCAAAAGTGCCCTTAAATGAATTTTCCCGAGAAATGTTTCAAATAAA                                               | 959 |
| TdelSat05-1000 | AGTTGTAGCTCTTTGTATGTGTAGTTGATATACCAAGTTTAAAGAAA 1006                                                    |     |

## TdelSat05-1000 vs TdelSat81-185

|                |                                                                                                          |     |
|----------------|----------------------------------------------------------------------------------------------------------|-----|
| TdelSat05-1000 | ATCGTCGGAGCCATTTTTTGAGAAAATCGCAAAAAAGTAAAAAAAACAAC TAGTAAAGTG                                            | 60  |
| TdelSat05-1000 | GTACTTCCGGTTGAGGAATTTTGACAGATAACGTACTGTGTCAGATCCCATGGTGATACCTA                                           | 120 |
| TdelSat05-1000 | AACGGAATATCAAGTTTCAACTTTCTACGGTTTTTCGTTTTTGAGCTATGCTGTTACAT                                              | 180 |
| TdelSat81-185  | CACACACCACA<br>* * ****                                                                                  | 16  |
| TdelSat05-1000 | ACATACATACACACACA-CACACACACACCATTGCTAAAAACCACTTTTTTGGACTCAG                                              | 239 |
| TdelSat81-185  | ACATATATATATAGAAAAGAGAAAGAAAACAATTTTATAAAAATCACATTTTGGACTCAG<br>***** ** * * * * * * * * * * * * * * * * | 76  |
| TdelSat05-1000 | GGGACCTCAAAACGGATATTTCCGGTGAAACTCGATATCGAAAATTTGACACGATTACA                                              | 299 |
| TdelSat81-185  | GGGATCTCAAAACATACACTTGCAATTTTATTTAATTGAAACTGCGTGTGCTATTCCTTA<br>**** * * * * * * * *                     | 137 |
| TdelSat05-1000 | ATACTTCTCTTACTAGGAGTAAGAGAAAAGTAAAAAAAATACTGGTGTGAAACACTC                                                | 359 |
| TdelSat81-185  | GAGATATCCATAATATGAGAGTTTATATTGTTTCCCTCTCACACGCATA<br>* * * * *                                           | 185 |
| TdelSat05-1000 | ACACAACTTTCTCTTACTCCAGTTCTCAAAATTATAATTGACAAATTTTATAGTTTGTGT                                             | 419 |
| TdelSat05-1000 | ACCAAATTTAATGAAATTCGTGCGAAACTGAAAAAACTGTTTCAGTAAAAGCGCACTTCC                                             | 479 |
| TdelSat05-1000 | GGTTTACTAATTTTCTTGAAACTCGGAATTTTGCCATCTATTTATTTCTAATTAATTTT                                              | 539 |
| TdelSat05-1000 | GTTTGGATGATAGAATTGTATAATCAACTATGATAGCACTTTAGAGAAAAACATAACCCC                                             | 599 |
| TdelSat05-1000 | ACCCCTCCCTAAAAGTGCCCTTAAATGAATTTTCCAGAGAAATGTTTTAAATAAAAGT                                               | 659 |

|                |                                                                |      |
|----------------|----------------------------------------------------------------|------|
| TdelSat05-1000 | TGTAGATCTTTGTATGTGTAGTTTATATACGAAGTTTCAAGAAAAATCGTCGGAGCCATTT  | 719  |
| TdelSat05-1000 | TTGAGAAAAATCGCGAAAAAGTGAAAAAAATCATTTAGTAAAGTGGTAAAGTAAACGCACT  | 779  |
| TdelSat05-1000 | TCCGGTTATCCGATTTTTTTTCAAACCTCGGAATTTCAACAACATATTTAATTCTAATTAAC | 839  |
| TdelSat05-1000 | ATTATTTAGATGACAGAATTGTCTAATAAACTGAAATAGCACTTTAGATGAAAAACCTAAC  | 899  |
| TdelSat05-1000 | CCACCCCTCCCCCAAAGTGCCCTTAAATGAATTTTCCCGGAGAAATGTTTCAAATAAA     | 959  |
| TdelSat05-1000 | AGTTGTAGCTCTTTGTATGTGTAGTTGATATACCAAGTTTAAAGAAA                | 1006 |

## TdelSat05-1000 vs TdelSat-138-63

|                |                                                                            |      |
|----------------|----------------------------------------------------------------------------|------|
| TdelSat05-1000 | ATCGTCGGAGCCATTTTTGAGAAAAATCGCAAAAAAGTAAAAAAAACAACCTAGTAAAGTG              | 60   |
| TdelSat05-1000 | GTACTTCCGGTTGAGGAATTTTGACAGATAACGTACTGTGATGCCATGGTGATACCTA                 | 120  |
| TdelSat05-1000 | AACGGAATATCAAGTTTCAACTTTCTACGGTTTTTCGTTTTTGAGCTATGCTGTTACAT                | 180  |
| TdelSat05-1000 | ACATACATACACACACACACACACACCATTGCTAAAAACCCTTTTTTGGACTCAGG                   | 240  |
| TdelSat05-1000 | GGACCTCAAACCGATATTTCCGGTGAAAACTCGATATCGAAAAATTTGACACGATTACAA               | 300  |
| TdelSat05-1000 | TACTTCTCTTTACTAGGAGTAAGAGAAAGTAAAAAAAAAAATCTGGTGTGAAACACTCA                | 360  |
| TdelSat-138-63 | ---TTGCCACTAACAGCAAATAGAGAAAGTAAAAAAAAAGAGAAATTTGCCATTTTACATA<br>* * * * * |      |
| TdelSat05-1000 | CACAACTTTTCTCTTACTCCAGTTCTCTCAAATTATAATTGACAAATTTTATAGTTTGTGTA             | 420  |
| TdelSat-138-63 | TAATTA<br>*                                                                | 63   |
| TdelSat05-1000 | CCAAATTTAATGAAATTCGTCGAAAACTGAAAAAACTGTTTCAGTAAAAGCGCACTTCCG               | 480  |
| TdelSat05-1000 | GTTTACTAATTTTCTTGAAACTCGGAATTTTGCCCATCTATTTATTTCTAATTAATTTTG               | 540  |
| TdelSat05-1000 | TTTGATGATAGAATTGTATAATCAACTATGATAGCACTTTAGAGAAAAACATAACCCCA                | 600  |
| TdelSat05-1000 | CCCTCCCCCTAAAAGTGCCCTTAAATGAATTTTCCAGAGAAATGTTTAAATAAAAGTT                 | 660  |
| TdelSat05-1000 | GTAGATCTTTGTATGTGTAGTTTATATACGAAGTTTCAAGAAAAATCGTCGGAGCCATTTT              | 720  |
| TdelSat05-1000 | TGAGAAAAATCGCGAAAAAGTGAAAAAAATCATTTAGTAAAGTGGTAAAGTAAACGCACTT              | 780  |
| TdelSat05-1000 | CCGGTTATCCGATTTTTTTCAAACCTCGGAATTTCAACAACATATTTAATTCTAATTAACA              | 840  |
| TdelSat05-1000 | TTATTTAGATGACAGAATTGTCTAATAAACTGAAATAGCACTTTAGATGAAAACCTTAACC              | 900  |
| TdelSat05-1000 | CCACCCCTCCCCCAAAGTGCCCTTAAATGAATTTTCCCGAGAAATGTTTCAAATAAAA                 | 960  |
| TdelSat05-1000 | GTTGTAGCTCTTTGTATGTGTAGTTGATATACCAAGTTTAAAGAAA                             | 1006 |

## TdelSat12-52 vs TdelSat48-118

|               |                                                                        |     |
|---------------|------------------------------------------------------------------------|-----|
| TdelSat48-118 | ATACAATTTAACTGTTCAATCGCTTGTACAGCAGTAAATGGAACCATTAACTTGCTACCA           | 60  |
| TdelSat12-52  | ATATAAAA---TCTGATGTCTAATCACACGACTTTCTCTTATGCTGTAGGA                    | 48  |
| TdelSat48-118 | GGTGTTCCAAAGTAAACTGGTGTGAAATATTCACACGACTTTCTCTTACTCCAGTTA<br>* * * * * | 118 |
| TdelSat12-52  | GGTG                                                                   | 52  |

## TdelSat12-52 vs TdelSat29-137

|               |                                                                          |     |
|---------------|--------------------------------------------------------------------------|-----|
| TdelSat29-137 | CTACAATGAGATATATATAAAGTGACGAATTTACTTTAAACTTCCAATTTTACTCATTGG             | 60  |
| TdelSat12-52  | ATATAAATCTGATGTGTAAATCACACGACT                                           | 31  |
| TdelSat29-137 | TCCTAACATATAGTTTGGTGATGTTAGGAGGGGGAGGTGGTGGGGACACTCACACGACT<br>* * * * * | 120 |
| TdelSat12-52  | TTCTCTTAGTGCTGTAGGAGGTG                                                  | 52  |
| TdelSat29-137 | TTCTCTTACTCCTGTTA                                                        | 137 |
|               | * * * * *                                                                |     |

## TdelSat21-33 vs TdelSat57-271

|               |                                                                              |     |
|---------------|------------------------------------------------------------------------------|-----|
| TdelSat21-33  | TCTACACACATAAAATACC-TATCAC-----                                              | 23  |
| TdelSat57-271 | TCTACACATATAAAATCCCTTTCAGTTTTATTTGTAAATTTTTTTTGAAAAACATGGAT<br>***** * * * * | 60  |
| TdelSat21-33  | -----                                                                        | 23  |
| TdelSat57-271 | TTTAATGTAGTTTTGCGGAATCTGTAGCGTTGAAATTTCAAATTTTATATGGGCTTGATGG                | 120 |
| TdelSat21-33  | -----                                                                        | 23  |
| TdelSat57-271 | TTGAATGTTATTGGCACACTCTTCTGGCCGACTTGTCATCACTTCTACTATCCTACTTTT                 | 180 |
| TdelSat21-33  | -----                                                                        | 23  |
| TdelSat57-271 | TTACTTTCTCTTACTCCTACTAACAGGAAGTATTTTATTTTTTTGTGTTTGCGATTTCC                  | 240 |
| TdelSat21-33  | -----TGTATACTA                                                               | 33  |
| TdelSat57-271 | TCAAACAATGGCTTCAAATTTTGTATACTA                                               | 271 |
|               | * * * * *                                                                    |     |

TdelSat21-33 vs TdelSat64-39

TdelSat21-33 ACTATCTACACACATAAAATA-----CCTATCACTGTAT 33  
TdelSat64-39 ACTAACTACACACATAAATTATTAAATTATATATCGTAT 39  
\*\*\*\*\* \* \*\*\*\*

TdelSat24-147 vs TdelSat122-43

TdelSat24-147 CCAAGAAAGTTTCATTTTATGGCGTTTTGGGTGGGGGGTAAGGGGCAAGCTTTTCCCAAAA 60  
  
TdelSat24-147 TAGTGGTTTTTATTGTTTAGATTCTCCCACTGATGTAAAAATTGAAGACAACATAACATCT 120  
TdelSat122-43 ACTTAAGTATGTAAAAATTGAAGACAAGCAAACGAAA 37  
\* \* \*\*\*\*\*  
  
TdelSat24-147 AGTGAGAGAATTAGACTTTTGAAAGTT 147  
TdelSat122-43 TTGAAG 43  
\*\*

TdelSat29-137 vs TdelSat48-118

TdelSat29-137 CTACAATGAGATATATATAAAGTGACGAATTACTTTAAACTTCCAATTTTACTCATTTG 60  
TdelSat48-118 -----ATACAATTAACTGTTCAATCGCTTG-----TACAGCAGTAAATGG 41  
\*\*\*\*\* \*  
  
TdelSat29-137 TCCTAACATATAGTTTGGTGATGTTAGGAGGGGGAGGTGGTGGGGACACTCACACGACT 120  
TdelSat48-118 AACCATTAACCTTGCTACCAGGTGTTTCAAAGTAAACGGGTGAAATATCACACGACT 101  
\* \* \* \* \* \* \* \* \* \*  
  
TdelSat29-137 TTCTCTTACTCCTGTTA 137  
TdelSat48-118 TTCTCTTACTCCAGTTA 118  
\*\*\*\*\*

TdelSat36-128 vs TdelSat54-189

TdelSat36-128 TCTCAA TTACTCATATGTCTTAATATAAATATACAGGTGGTGGGAGACAAG----T 52  
TdelSat54-189 TTTCAAATTTTGCTCATATATCCCAACATAAATATCCAGGTGGTGGGGGGAGGGACGAGT 60  
\* \* \* \* \* \* \* \* \* \*  
  
TdelSat36-128 GCCAGCCTAGCAACACAGACAGGTACAGAATGATTACATTGTAGACAGCCAATAATATTG 112  
TdelSat54-189 GCCAATGTACCACCAGGCAGGTAGATAACGGATTGCACGGTAGAGA-GCGTCAATAATG 119  
\* \* \* \* \* \* \* \* \* \*  
  
TdelSat36-128 AACAAACACATTTGAA 128  
TdelSat54-189 AACAAACACATTGAA TTTTAAACGTCTCTTGATTCTCAGAGAACCACCTAAAAACAAT 179  
\*\*\*\*\*  
  
TdelSat54-189 TTTTTTTAAA 189

TdelSat36-128 vs TdelSat72-85

TdelSat36-128 TCTCAATTACTCATATGTCC TAATATAAATATACAGGTGGTGGGAGACAAGTGCCAGCCT 60  
TdelSat72-85 ATAAACATAAATATGGAGGTGGTGGGAGATAGGTAAATACCT 41  
\* \* \* \* \* \* \* \* \* \*  
  
TdelSat36-128 AGCAACACAGACAGGTACAG--AATG-ATTACATTGTAGACAGCCAATAATATTGAACA 116  
TdelSat72-85 CTCTACTCAGCTGGCAGGTAGACAAGTGTATGTATTGTCTT -----AAATTTCTTTA 85  
\* \* \* \* \* \* \* \* \* \*  
  
TdelSat36-128 AACACATTGAA 128

TdelSat48-118 vs TdelSat88-87 (reverse)

TdelSat48-118 ATACAATTAACTGTTCAATCGCTTGTACAGCAGTAAATGGAACCATTAACTTGCTACCA 60  
TdelSat88-87 (rev) ATACAATTACAATTAC-----AAATTTCTTTA 29  
\*\*\*\*\* \* \* \* \*  
  
TdelSat48-118 GGTGTTTCAAAGTAAAC TGGTGTGAAATATTCACACGACTTTCTCTTACTCCAGTTA 118  
TdelSat88-87 (rev) TATTGTAATGTTACTCAAT TGGTGTGAAACATTGACACGACTTGGTCTCATTGCAGTTA 87  
\* \* \* \* \* \* \* \* \* \*

TdelSat54-189 vs TdelSat72-85

|               |                          |                                      |                                      |      |
|---------------|--------------------------|--------------------------------------|--------------------------------------|------|
| TdelSat54-189 | TTTCAAATTTTGCTCATATATCCC | AACATAAATATCCAGGTGGTGGG              | GGGAGGGACGAGT                        | 60   |
| TdelSat72-85  |                          | AT                                   | AACATAAATATGGAGGTGGTGGCAGATAGGTA-AAT | 37   |
|               |                          | *****                                | ***** *                              | ** * |
| TdelSat54-189 | GCCAATGTACCACCAG         | GGCAGGTAGATAA                        | CGGATTGCACGGTAGAGAGCGTCAATAATGA      | 120  |
| TdelSat72-85  | ACCTCTCTACTCAGCT         | GGCAGGTAGACAA                        | GTGTTTATGTATTGTCTT                   | 85   |
|               | ** * **                  | ***** **                             | * **                                 | * *  |
| TdelSat54-189 | ACAAACACATTTGAATTTTAA    | CGTCTCTTGATTCTCAGAGAACCACTAAAAACAATT |                                      | 180  |
| TdelSat54-189 | TTTTTTAAA                | 189                                  |                                      |      |

TdelSat68-160 vs TdelSat73-372

The sequence of TdelSat73-372 was separated into two regions: the first one between positions 1 to 237 (TdelSat73-372-1) and the second one between positions 238 and 372 (TdelSat73-372-2). Ast

|                 |                                                               |                         |
|-----------------|---------------------------------------------------------------|-------------------------|
|                 | *****                                                         |                         |
| TdelSat73-372-1 | TAGTGCTGCGTTTGTGCCGGCGATTACCAAATTTCAACGTTTGTGCCGTAAAATTGACA   | 60                      |
| TdelSat68-160   | TAGTGCTGCGTTTGTGCCGGCGATTACCAAATTTTCATCGTTTGTGCCGTAAAATTGACA  | 60                      |
| TdelSat73-372-2 | AAGTGATTCATTTGTGCCAGCGACCCACCAAATTTTCAGCGTTTGTGCTGCAAAATTGACA | 297                     |
|                 | **** * *                                                      | ***** *                 |
|                 | ***** * ***** **                                              | ** *                    |
| TdelSat73-372-1 | AAGATATTGACGAAAACTGTTTCGTCGTACTTGAAAACCAAAGGCCATGGCTGCGAGTAA  | 120                     |
| TdelSat68-160   | AAGATATTAAAGAAAAAAGTGCCAGTCCAACCTTGA-----                     | 97                      |
| TdelSat73-372-2 | AAGTTATTGAGG-----                                             | 309                     |
|                 | *** **** *                                                    |                         |
|                 |                                                               | **                      |
| TdelSat73-372-1 | CATTTGAATGTGCGCGTGCTCCACTGACCGCCAACGGCCCTTATCAGGGCCAGCAACTAA  | 180                     |
| TdelSat68-160   | -----CGTCAA                                                   | 103                     |
| TdelSat73-372-2 | -----CGTCAA                                                   | 315                     |
|                 | *****                                                         |                         |
|                 | * ***** * ***** **                                            | ** * ***** * ** * * * * |
| TdelSat73-372-1 | AATGTACTGGCCCTCGATTCTAATCAAAATTTCTGGAATTTTCTTCGCTATTCTT       | 237                     |
| TdelSat68-160   | GTTAGACTGGCCACCAATTCTATTCACTTTTTTAAATTTTCTTTTACCAATCGT        | 160                     |
| TdelSat73-372-2 | GTTAGACTGGCCACCAATTCTATTCACTTTTTTAACTTTTCTCTTTGCCAATCGT       | 372                     |
|                 | *****                                                         | ***** ** *              |
