# Supplementary material for: Making the Genome Huge: The Case of Triatoma delpontei, a Triatominae Species with More than 50% of Its Genome Full of Satellite DNA
Source: MDPI journal article supplement (doi:10.3390/genes14020371), 2023-01-31
Supplement: s1 [file s1]

**Figure S2.** Alignments of the consensus sequences for the shared satDNA families between *Triatoma delpontei* and *Triatoma infestans*.

|                  |                                                                |     |
|------------------|----------------------------------------------------------------|-----|
| TdelSat01-79     | CCCTAAAATCGGCGTTTCAAACGTAAGAGTGAGTTTTTCGAGCAACACTCACTTCAGTT 60 |     |
| TinfSat02-79     | CCCTAAAATCGGCGTTTCAAACGTAAGAGTGAGTTTTTCGAGCAACACTCACTTCAGTT 60 |     |
|                  | *****                                                          |     |
| TdelSat01-79     | GGTTGTAAGGTTCAAGAAAAT                                          | 79  |
| TinfSat02-79     | GGTTGTAAGGTTCAAGAAAAT                                          | 79  |
|                  | *****                                                          |     |
| <hr/>            |                                                                |     |
| TdelSat02-8      | GATAGTTA                                                       | 8   |
| TinfSat03-4 (2X) | GATAGATA                                                       | 8   |
|                  | *****                                                          |     |
| <hr/>            |                                                                |     |
| TdelSat03-10     | RCATACTCGK                                                     | 10  |
| TinfSat07-10     | RCATACTCGK                                                     | 10  |
| TinfSat36-10-rev | ACATACTCGK                                                     | 10  |
|                  | *****                                                          |     |
| <hr/>            |                                                                |     |
| TdelSat04-53     | AACGGTTTTGGTTATACTATTTTTTCCAAACCCGCAATACACGTTTGCCCTTC          | 53  |
| TinfSat10-53     | AACGGTTTTGGTTATACTATTTTTTCCAAACCCGCAATACACGTTTGCCCTTC          | 53  |
|                  | *****                                                          |     |
| <hr/>            |                                                                |     |
| TdelSat05-1000   | ATCGTCGGAGCCATTTTTGAGAAAATCGCAAAAAGTAAAAAAAAACAACACTAGTAAAGTG  | 60  |
| TinfSat04-1000   | ATCGTCGGAGCCATTTTTGAGAAAATCGCAAAAAGTAAAAAAAAACAACACTAGTAAAGTG  | 60  |
|                  | *****                                                          |     |
| TdelSat05-1000   | GTACTTCCGGTTGAGGAATTTGACAGATAACGTACTGTCAGATCCCATGGTGATACCTA    | 120 |
| TinfSat04-1000   | GTACTTCCGGTTGAGGAATTTGACAGATAACGTACTGTCAGATCCCATGGTGATACCTA    | 120 |
|                  | *****                                                          |     |
| TdelSat05-1000   | AACGGAATATCAAGTTTCAACTTTCTACGGTTTTTCGTTTTGAGCTATGCTGTTTCACAT   | 180 |
| TinfSat04-1000   | AACGGAATATCAAGTTTCAACTTTCTACGGTTTTTCGTTTTGAGCTATGCTGTTTCACAT   | 180 |
|                  | *****                                                          |     |
| TdelSat05-1000   | ACATACATACACACACACACACACCATTGCTAAAAACCACTTTTTTGACTCAGG         | 240 |
| TinfSat04-1000   | ACATACATAC-----TTTGCTAAAAACCACTTTTTTGACTCAGG                   | 220 |
|                  | *****                                                          |     |
| TdelSat05-1000   | GGACCTCAAAACGGATATTTCCGGTGAAAACTCGATATCGAAAATTTGACACGATTACAA   | 300 |
| TinfSat04-1000   | GGACCTCAAAACGGATATTTCCGGTGAAAACTCGATATCGAAAATTTGACACGATTACAA   | 280 |
|                  | *****                                                          |     |
| TdelSat05-1000   | TACTTCCTCTTACTAGGAGTAAGAGAAAGTAAAAAAAAAAATCTGGTGTGAAACACTCA    | 360 |
| TinfSat04-1000   | TACTTCCTCTTACTAGGAGTAAGAGAAAGTAAAAAAAAAAATCTGGTGTGAAACACTCA    | 340 |
|                  | *****                                                          |     |
| TdelSat05-1000   | CACAACTTTCTCTTACTCCAGTTCTCAAAATTATAATTGACAAATTTTATAGTTTGTGTA   | 420 |
| TinfSat04-1000   | CACAACTTTCTCTTACTCCAGTTCTCAAAATTATAATTGACAAATTTTATAGTTTGTGTA   | 400 |
|                  | *****                                                          |     |
| TdelSat05-1000   | CCAAATTATGAAATTCGTCGAAAACCTGAAAAAACTGTTTCAGTAAAAGCGCACTTCCG    | 480 |
| TinfSat04-1000   | CCAAATTATGAAATTCGTCGAAAACCTGAAAAAACTGTTTCAGTAAAAGCGCACTTCCG    | 460 |
|                  | *****                                                          |     |
| TdelSat05-1000   | GTTTACTAATTTTCTTGAAACTCGGAATTTTGGCCATCTATTTATTCTAATTAATTTTG    | 540 |
| TinfSat04-1000   | GTTTACTAATTTTCTTGAAACTCGGAATTTTGGCCATCTATTTATTCTAATTAATTTTG    | 520 |
|                  | *****                                                          |     |
| TdelSat05-1000   | TTTGGATGATAGAATTGTATAATCAACTATGATAGCACTTTAGAGAAAAACATAACCCCA   | 600 |
| TinfSat04-1000   | TTTGGATGATAGAATTGTATAATCAACTATGATAGCACTTTAGAGAAAAACATAACCCCA   | 580 |
|                  | *****                                                          |     |
| TdelSat05-1000   | CCCTCCCTAAAAGTGCCCTTAAATGAATTTTCCAGAGAAATGTTTAAATAAAAGTT       | 660 |
| TinfSat04-1000   | CCCTCCCTAAAAGTGCCCTTAAATGAATTTTCCAGAGAAATGTTTAAATAAAAGTT       | 640 |
|                  | *****                                                          |     |
| TdelSat05-1000   | GTAGATCTTTGTATGTGTAGTTTATATACGAAGTTTCAAGAAAATCGTCGGAGCCATTTT   | 720 |
| TinfSat04-1000   | GTAGATCTTTGTATGTGTAGTTTATATAGGAAGTTTCAAGAAAATCGTCGGAGCCATTTT   | 700 |
|                  | *****                                                          |     |
| TdelSat05-1000   | TGAGAAAATCGCGAAAAAGTGAAAAAATCATTTAGTAAAGTGGTAAAGTAAACGCACTT    | 780 |
| TinfSat04-1000   | TGAGAAAATCGCGAAAAAGTAAAAAATCATTTAGTAAAGTGGTAAAGTAAACGCACTT     | 760 |
|                  | *****                                                          |     |
| TdelSat05-1000   | CCGGTTATCCGATTTTTTCAAACCTCGGAATTTCAACAACATATTTAATTCTAATTAACA   | 840 |
| TinfSat04-1000   | CCGGTTATCCGATTTTTTCAAACCTCGGAATTTCAACAACATATTTAATTCTAATTAACA   | 820 |
|                  | *****                                                          |     |

|                   |                                                                        |      |
|-------------------|------------------------------------------------------------------------|------|
| TdelSat05-1000    | TTATTTAGATGACAGAATTGTCTATAAACTGAAATAGCACTTTAGATGAAAACCTAACC            | 900  |
| TinfSat04-1000    | TTATTTAGATGAYAGAATTGTCTATAAACTGAAATAGCACTTTAGATGAAAACCTAACC<br>*****   | 880  |
| TdelSat05-1000    | CCACCCCTCCCCAAAAGTGCCCTTAAATGAATTTCCCGGAGAAATGTTTCAAATAAAA             | 960  |
| TinfSat04-1000    | CCACCCCTCCCCAAAAGTGCCCTTAAATGAATTTCCCRGAGAAATGTTTCAAATAAAA<br>*****    | 940  |
| TdelSat05-1000    | GTTGTAGCTCTTTGTATGTGTAGTTGATATACCAAGTTTAAAGAAA                         | 1006 |
| TinfSat04-1000    | GTTGTAGCTCTTTGTATGTGTAGTTGATATACCAAGTTTAAAGAAA<br>*****                | 986  |
| <hr/>             |                                                                        |      |
| TdelSat06-25 (4x) | AGAATGTATAACTTTGACAAAATGTAGAAATGTATAACTTTGACAAAATGTAGAAATGTATA         | 60   |
| TinfSat09-113     | AGAATGTAGAACTTTGAAAAATGTTAGAAATGTAGAAATTTGCGTAATATAGAAATGTATA<br>***** | 60   |
| TdelSat06-25 (4x) | ACTTTGACAAA-----TGTTAGAAATGTATAACTTTGACAAA-----TGTT                    | 100  |
| TinfSat09-113     | ACTTTGAAAAACATGAATTATTAGAAATGTAGAACTTT-ACAAATACTAATTATT<br>*****       | 113  |
| <hr/>             |                                                                        |      |
| TdelSat07-334     | TAAACAGGCATAGGATATTATGCGCTAAAAACATGTTACTTTTAAATCAAAGAAATATTG           | 60   |
| TinfSat52-334     | TAAACAGGCATAGGATATTATGCGCTAAAAACATGTTACTTTTAAATCAAAGAAATATTG<br>*****  | 60   |
| TdelSat07-334     | GAACAAGTTAAACCATTATAAGTTTCTAATCTGGGGAAATGATTGCATTATATCCAAATT           | 120  |
| TinfSat52-334     | GAACAAGTTAAACCATTATAAGTTTCTAATCTGGGGAAATGATTGCATTATATCCAAATT<br>*****  | 120  |
| TdelSat07-334     | CGAAATCTTCTGTTTGTAGCCATTGTCTAACGTCTATTAGTCCAAGAAAAACACAGATA            | 180  |
| TinfSat52-334     | CGAAATCTTCTGTTTGTAGCCATTGTCTAACGTCTATTAGTCCAAGAAAAACACAGATA<br>*****   | 180  |
| TdelSat07-334     | TACAATAGAATATAAACATATATTGCACTAAAACATTCTTAAGTTATCGCATGGCAATTA           | 240  |
| TinfSat52-334     | TACAATAGAATATAAACATATATTGCACTAAAACATTCTTAAGTTATCGCATGGCAATTA<br>*****  | 240  |
| TdelSat07-334     | TTGTGGATTGCAATAACAGTTTGTCTAGTAATTTCCAAGTTCTTTCCCTCAACCTTTCTAA          | 300  |
| TinfSat52-334     | TTGTGGATTGCAATAACAGTTTGTCTAGTAATTTCCAAGTTCTTTCCCTCAACCTTTCTAA<br>***** | 300  |
| TdelSat07-334     | ATATGTAACAACTTCTTCTGCCATCTTACATTCT                                     | 334  |
| TinfSat52-334     | ACATGTAACAACTTGTCTACTGTCTTACATTCT                                      | 334  |
| <hr/>             |                                                                        |      |
| TdelSat08-247     | GGCGCGTCAACATCTATGGTCATTGGCGCCCGAGCCTTCTCAGTGCACCTGCCGCCCTCC           | 60   |
| TinfSat43-242     | GGCGCGTCAACATCTATGGTCATTGGCGCCCGAGCCTTCTCAGTGCACCTGCCGCCCTCC<br>*****  | 60   |
| TdelSat08-247     | GGACAGTGTTCTCTCGTTACAGACAACACTGTCCATCACCGGACAGTGAGCTGTAGAGGC           | 120  |
| TinfSat43-242     | GGACAGTGTTCTCTCGTTACAGACAACACTGTCCATCACCGGACAGTGAGCTGTAGAGGC<br>*****  | 120  |
| TdelSat08-247     | TCCTAGGAAGAGAAAATCTAAGGGTAGCACAGCTGGACTCGAACC CGGGACCTCCGCGTG          | 180  |
| TinfSat43-242     | TCCTAGGAAGAGAAAATCTAAGGGCAGCAC-GCTGGACTCGAACC CGGGACCTCCGCGT-<br>***** | 179  |
| TdelSat08-247     | GGAGTCCAGTACGCTAACCACTTAGCTATTCCTTCCCTTTATTATTATTATTATTTTTT            | 240  |
| TinfSat43-242     | GGAGTCCAGT-CGCTAACCACTGAGCTAATCCCTTCCCTTT--TTTTTTTTTTTTTTTTT<br>*****  | 235  |
| TdelSat08-247     | AATTTAA                                                                | 247  |
| TinfSat43-242     | AATTTAA                                                                | 242  |
| <hr/>             |                                                                        |      |
| TdelSat09-181     | CGGCTCAAAAAACAATATTAAAGTCCTTAGAATGTTTTAGCTAAAAATATTATAAGTGTA           | 60   |
| TinfSat06-181     | CGGCTCAAAAAACAATATTAAAGTCCTTAGAATGTTTTAGCTAAAAATATTATAAGTGTA<br>*****  | 60   |
| TdelSat09-181     | ACATAATTTAAATATACATAAAAAAAACAAAGTCTTTGTTTCATAGTATTGGATGATAAT           | 120  |
| TinfSat06-181     | ACATAATTTAAACATACATAAAAAAAACAAAGTCTTTGTTTCATAGTATTGGATGATAAT<br>*****  | 120  |
| TdelSat09-181     | ATATTTAATGTTTCTAGCTAAATATTATAAAATATTAGCCCTAGTCTTGTATGTCATCTC           | 180  |
| TinfSat06-181     | ATATTTAATGTTTTAGCTAAATATTATAAAATATTAGCCCTCGTCTTGATGTCATCTC<br>*****    | 180  |
| TdelSat09-181     | A 181                                                                  |      |
| TinfSat06-181     | A 181                                                                  |      |
| <hr/>             |                                                                        |      |

|               |                                                                                |     |
|---------------|--------------------------------------------------------------------------------|-----|
| TdelSat10-315 | GCAGATATATGGCTAGCCAGAGTGGTAGTGGGCTGAAAGCCCGCTTAAAACTGGCTGATT                   | 60  |
| TinfSat37-314 | GCATATATATGGCTAGCCAGAGTGGTCGTGGGCTGAAAGCCCGCTTAAAACTGGCTGATT<br>*** *****      | 60  |
| TdelSat10-315 | GGGCAACTGAGATTCAATCTGCTGACTATGCCATCACTGCCGGGCGGCGGTGTCGGAGA                    | 120 |
| TinfSat37-314 | GGGCTACTGAGGTTCAATCTGCTGACTATGCCATCACTGCCGGGCGGCGGTGCCGGAGA<br>**** *****      | 120 |
| TdelSat10-315 | AATCGGCGATTAAAGTCGATAACGCCACCTATACGGCAGGTAATGACATGACCATTAGTG                   | 180 |
| TinfSat37-314 | AATCGGCGATTAAAGTCGATAACACCACCTATACGGCAGGTAATGACATGACCGTTAGTG<br>*****          | 180 |
| TdelSat10-315 | TGACGCTGAAGGATGCGCAGGGTAATGGGGTTACTGGCCAAGCTGCTGCCTTAACGTCCC                   | 240 |
| TinfSat37-314 | TGACGCTGAAGGATGCGCAGGGTAATGGGGTTACTGGCCAAGCTGCTGCCTTAACGTCCC<br>*****          | 240 |
| TdelSat10-315 | AGGCGGTAAACGGTGGCCAATGCCAGTGAGAAATCCGGTGTCACGTGGATCGATAACGGCG                  | 300 |
| TinfSat37-314 | AGGCGGTAAACGGTGGCCAATGCCAGTGAGAAAGACGGTGTCACGTGGATCGATAACGGCG<br>*****         | 300 |
| TdelSat10-315 | ACGGCACCTATAGCC                                                                | 315 |
| TinfSat37-314 | A-GGCACCTATAGCC<br>* *****                                                     | 314 |
| <hr/>         |                                                                                |     |
| TdelSat11-239 | ACCCGCGCGCACCTATTCTAAAAATTAAATTCTCTGAAATAAAAGTAAAGTAAAGAATG                    | 60  |
| TinfSat08-239 | TCCCGCGCGAACCTATTCTAAAACTAAATTCTCTGAAATAAAAGTAAAGTAAAGAGTG<br>*****            | 60  |
| TdelSat11-239 | CCTATTTTTCAGGCTGACGTAACATTCAACTAACAAATTAGGTATCGTGACGGGGGCAG                    | 120 |
| TinfSat08-239 | CCTATTTTTCAGGCTGACGTAACATTCAACTAACAAATTAGGTATCGTGGTAGGGGGCAC<br>*****          | 120 |
| TdelSat11-239 | AAACTCCTACTTCACTATTAACATTTTCCATACCAATATAAAATTTAGCAACTATACGC                    | 180 |
| TinfSat08-239 | AACTCCTACTTCACTATTAACATTTT-CCATACCGATATAAAATTTAGCAACTCGACGC<br>*****           | 179 |
| TdelSat11-239 | GGGACTCGAACTGGGGACCTCCCGCGTTCGAGTCCATGCTCACAACCACTAATGAATTAA                   | 240 |
| TinfSat08-239 | GGGACCCGAACTGGGGACCTCCCGCGTTCGAGTCCATGCTCACAACCACTAATGAATAA<br>*****           | 239 |
| <hr/>         |                                                                                |     |
| TdelSat12-52  | CACCTCCTACAGCACTAAGAGAAAGTCGTGTGATTACACATCAGATTTATAT                           | 52  |
| TinfSat32-52  | CAACTCCTACAGCACTAAGAGAAAGTCGTGTGATTACACATCAGATTTGTAT<br>*****                  | 52  |
| <hr/>         |                                                                                |     |
| TdelSat14-94  | CGGAAAATGTCTCTGATAAAG--AATATTAT-GAATGTAAAGAATGTAAAGAATATTAG                    | 56  |
| TinfSat45-94  | CGGAAAATGTCTCTGATGCTTTCAGCTCTGCGGAA-CCAACCACCACAAAACGCCCGAA<br>***** * * * * * | 59  |
| TdelSat14-94  | AATAAGAATGTAAAAACAAAATGAAGCAGGCTACCA                                           | 94  |
| TinfSat45-94  | ACCGGTCGATG--ACCACAAAATGAAGCAGGCTACCA<br>* * * * *                             |     |
| <hr/>         |                                                                                |     |
| TdelSat15-93  | AGAGTGTGTGGTTTCCTCAACAAATCCATTTTATTAAGTTTAGATTCTCCCAATGACAC                    | 60  |
| TinfSat49-94  | GGAGTGTATGGTTTCCTCAAAAAGTCATTTTATTAAGTTTAGATTCTCCAATGTATATA<br>*****           | 60  |
| TdelSat15-93  | ACAATGTAAACAAGTACACATT-AGGGGAGAGGG                                             | 93  |
| TinfSat49-94  | AAATTGAAGACAATTAAACATTTTGAGAGAGAGGG                                            | 94  |
|               | * * * * *                                                                      |     |
| <hr/>         |                                                                                |     |
| TdelSat17-84  | AAAAGACATATGCGAACACATACAGCGGAGAAGCCATATAAATGTAGTGAATGCGATTAC                   | 60  |
| TinfSat12-84  | AAAAACATATGCGAACACATACAGCGGAGAAGCCATATAAATGTAGTGAATGTGATTAC<br>*****           | 60  |
| TdelSat17-84  | AGTTGTACAACAACCTGGAAATTTA                                                      | 84  |
| TinfSat12-84  | AGTTGTACACAATCTGGAAATCTT<br>***** * ***** *                                    | 84  |
| <hr/>         |                                                                                |     |
| TdelSat18-62  | TTTTCTGCGATTTTCTCCATAACGGTGGACTAGAAAGTGCTACTTCACTGGTGAAGTTCTT                  | 60  |
| TinfSat25-62  | TTTTCTGCGATTTTCTCCATAACGGTGGACTAGAAAGTGCTACTTCACTGGTGAAGTTCTT<br>*****         | 60  |
| TdelSat18-62  | TG                                                                             | 62  |
| TinfSat25-62  | CG                                                                             | 62  |
|               | *                                                                              |     |
| <hr/>         |                                                                                |     |
| TdelSat19-58  | TAATCTGAGTTGGAACATATCCATTGTAGTGAACCATATTTGTTACTATCAGCGTAT                      | 58  |
| TinfSat30-58  | TAATCTGAGTTGGAACATATCCATTGTAGTGAACCATATTTGTTACTATCAGCGTAT<br>*****             | 58  |

|               |                                                                        |     |  |
|---------------|------------------------------------------------------------------------|-----|--|
| TdelSat21-33  | TCTACACACATAAAATACCTATCACTGTATACTA                                     | 33  |  |
| TinfSat60-33  | TCTACACACATAAAATACCTATCACTGTATACTA<br>*****                            | 33  |  |
| TdelSat22-104 | GCTTAGTCAGTTCAATTATACATTTAGTTGGCTGAATGGTGAGCAACCTAATGTTTGTAT           | 60  |  |
| TinfSat19-104 | GCTTAGTCAGTTCAATTATACATTTAGTTGGCTGAATGGTGAGCAACCTAATGTTTGTAT<br>*****  | 60  |  |
| TdelSat22-104 | TTATTAGCGAGAATGTGATGATAGGTTAGAGTGTGCTTGTATGG                           | 104 |  |
| TinfSat19-104 | TTATTAGCGAGAATGTGATGATAGGTTAGAGTGTGCTTGTATGG<br>*****                  | 104 |  |
| TdelSat23-112 | GACACTAAGTTATCTGTCAAAATTCCACAACCGGAACAAACACAACCACAACAAAAACAA           | 60  |  |
| TinfSat42-112 | GACACTAAGTTATCTGTCAAAATTCCACAACCGGAACAAACACAACCACAACAAAAACAA<br>*****  | 60  |  |
| TdelSat23-112 | AAATCGCAGAAAATTCAAACCTTGACATTCTGTTTAGATATCACCGTGGGTTC                  | 112 |  |
| TinfSat42-112 | AAATCGCAGAAAATTCAAACCTTGACATTCTGTTTAGATATCACCGTGGGTTC<br>*****         | 112 |  |
| TdelSat24-147 | CCAAGAAAGTTCATTTTATGGCGTTTGGGTGGGGGTAAGGGGCAAGCTTTTCCCAAAA             | 60  |  |
| TinfSat14-147 | CCAAGAAAGTTCATTTTATGGCGTTTGGGTGGGGGTAAGAGGCAAGCTTTTCCCAAAA<br>*****    | 60  |  |
| TdelSat24-147 | TAGTGGTTTTTATTGTTTAGATTCTCCCACTGATGTAAAATTGAAGACAACATAACATCT           | 120 |  |
| TinfSat14-147 | TAGTGGTTTTTATTGTTTAGATTCTCCCACTGATGTAAAATTGAAGACAACATAACATCT<br>*****  | 120 |  |
| TdelSat24-147 | AGTGAGAGAATTAGACTTTTGAAAGTT                                            | 147 |  |
| TinfSat14-147 | AGTGAGAGAATTAGACTTTTGAAAGTT<br>*****                                   | 147 |  |
| TdelSat29-137 | TAACAGGAGTAAGAGAAAAGTCGTGTGAGTGTCCCCACCACCTCCCCCTCCTAACATCAC           | 60  |  |
| TinfSat51-137 | TAACAGGAGTAAGAGAAAAGGCGTGTGAGTGTCCCCACCACCTCCCCCTCCTAACATCAC<br>*****  | 60  |  |
| TdelSat29-137 | CAAACATATATGTTAGGACAAATGAGTAAAATTGGAAGTTTAAAGTAAATTCGTCACTTTA          | 120 |  |
| TinfSat51-137 | CAAACATATATGTTAGGACAAATGAGTAAAATTGGAAGTTTAAAGTAAATTCGTCACTTTA<br>***** | 120 |  |
| TdelSat29-137 | TATATATCTCATTGTAG                                                      | 137 |  |
| TinfSat51-137 | TATATATCTCATTGTAG<br>*****                                             | 137 |  |
| TdelSat32-49  | GAAGCTGTACAATAGTCAATTAGAATTAACAGAAAAATTATGTGAAAGGT                     | 49  |  |
| TinfSat16-49  | GAAGTGTGACAATAGTCAATTAGAATTAACAGAAAAATTATGTGAAAGGT<br>****             | 49  |  |
| TdelSat36-128 | TCTCAATTACTCATATGTCCTAATATAAATATACAGGTGGTGGGAGACAAGTGCCAGCCT           | 60  |  |
| TinfSat53-128 | TTTCAATTACTCATATGTCCTAATATAAATATACAGGTGGTGGGAGACAAGTGCCAGCCT<br>*****  | 60  |  |
| TdelSat36-128 | AGCAACACAGACAGGTACAGAATGATTACATTGTAGACAGCCAATAATATTGAACAAACA           | 120 |  |
| TinfSat53-128 | AGCAACACAGACAGGTACAGAATGATTACATTGTAGATAGCCAATAATATTGAACAAACA<br>*****  | 120 |  |
| TdelSat36-128 | CATTTGAA                                                               | 128 |  |
| TinfSat53-128 | CATTTGAA<br>*****                                                      | 128 |  |
| TdelSat38-147 | GTTATCTGGTTGGCTTTTTCCTGCGTTTCAGATTTGATTCTTTTCTGCGCAGTTTT               | 60  |  |
| TinfSat13-147 | GTTATCTGGTTGGCTTTTTCCTGCGTTTCAGATTTTGAATTCCTTTTCTGCGCAGTTTT<br>*****   | 60  |  |
| TdelSat38-147 | TGATCCCGCTTGAATGAATGGTGGGATTGGTGGAACATTGTCTATTTTCAGATATCGATTT          | 120 |  |
| TinfSat13-147 | TGATCCCGCTTGAATGAATGGTGGGATTGGCGGAACATCGTCTATTTTCAGATATCGATTT<br>***** | 120 |  |
| TdelSat38-147 | GTCAGCATCTTCACCTTCATTACTTGA                                            | 147 |  |
| TinfSat13-147 | GTCAGCATCTTCACCTTCATTACTTGA<br>*****                                   | 147 |  |
| TdelSat45-102 | TTTCGCGGAAAAAAGTTCCCAATAAAAGTGACGGCATTTCGATTCACAGTTACTGTAGGAC          | 60  |  |
| TinfSat18-102 | GTTCGCGGAAAAAAGTTCCCAATAAAAGTGACGGCATTTCGATTCACAGTTACTGTAGGAC<br>***** | 60  |  |

|               |                                                              |     |
|---------------|--------------------------------------------------------------|-----|
| TdelSat45-102 | GTTTAGTGAAATCCGTTGCCATTTTACTAAATAAATCAACT                    | 102 |
| TinfSat18-102 | GTTTAGTGAAATCCGTTGCCATTTTACTAAATAAATCAACT                    | 102 |
| *****         |                                                              |     |
| <hr/>         |                                                              |     |
| TdelSat46-114 | TATCGTTTACAACTATTATTAATCTCATTACAGAGAATCTCTATATCGTTTTAGCAGAAC | 60  |
| TinfSat67-114 | TATCGTTTACAACTATTATTAATCTCATTACAGAGAATCTCTATATCGTTTTAGCAGAAC | 60  |
| *****         |                                                              |     |
| TdelSat46-114 | ATTCTACAATAACTCCGCCATTAGAGATTCCCTTAATGTTTTCTACACCCAATT       | 114 |
| TinfSat67-114 | ATTCTACAATAACTCCGCCATTAGAGATTCCCTTAATGTTTTCTACACCCAATT       | 114 |
| *****         |                                                              |     |
| <hr/>         |                                                              |     |
| TdelSat48-118 | TAACTGGAGTAAGAGAAAGTCGTGTGAATATTTACACCAGTTTACTTTGAAACACCTG   | 60  |
| TinfSat56-118 | TAACTGGAGTAAGAGAAAGTCGTGTGAATATTTCCACCAGTTTACTTTGAAACACCTG   | 60  |
| *****         |                                                              |     |
| TdelSat48-118 | GTAGCAAGTTAATGGTTCATTTACTGCTGTACAAGCGATTGAACAGTTAAATTGTAT    | 118 |
| TinfSat56-118 | GTAGCAAGTTAATGGTTCGTTTACTGCTGTACAAGCGATTGAACAGTTAAATTGTAT    | 118 |
| *****         |                                                              |     |
| <hr/>         |                                                              |     |
| TdelSat50-101 | ATATTTGTAGCAAAATAGTTAATTCTAAAGTAGGGGGGGAATGCAGAGAGCAGTCAACT  | 60  |
| TinfSat96-101 | ATATTTGTAGCAAAATAGTTAATTCTAAAGTAGGGGGGGAATGCAGAGAGCAGTCAACT  | 60  |
| *****         |                                                              |     |
| TdelSat50-101 | TCATTTGAACATAAACATCATTTATTATGTAACTTACACT                     | 101 |
| TinfSat96-101 | TCATTTGAACATAAACATCATTTATTATGTAACTTACACT                     | 101 |
| *****         |                                                              |     |
| <hr/>         |                                                              |     |
| TdelSat51-46  | ATGTACAGCCGATACAGAAAGTGTAATAAAGTTGTCGCTCTTTGT                | 46  |
| TinfSat28-46  | ATGTACAGCCGATACAGAAAGTTAATAAAGTTGTCGCTCTTTGT                 | 46  |
| *****         |                                                              |     |
| <hr/>         |                                                              |     |
| TdelSat52-88  | AGGTGAGTGTGTACTAAAATGAAATTTTATAGATGAATTTGGTGAAAATAGTGGATCTA  | 60  |
| TinfSat64-88  | AGGTGAGTGTGTACTAAAATGAAATTTTATAGATGAATTTGGTGAAAATAGTGGATTTA  | 60  |
| *****         |                                                              |     |
| TdelSat52-88  | GTATTTTATTTGTACATTAACACAACCTG                                | 88  |
| TinfSat64-88  | GTATTTTATTTGTACATTAACGCAACCTG                                | 88  |
| *****         |                                                              |     |
| <hr/>         |                                                              |     |
| TdelSat59-63  | CGTGGCCTAAGTGCTCGTCCAGTTCGATGATTGGTCAGTTGGAGAGGGGTGGGGGTAAGT | 60  |
| TinfSat50-63  | CGTGCTCTAAGTGCTCGTCCAGTTCGATGATTGGTCAGTTGGAGAGGGGTGGGGGTAAGT | 60  |
| *****         |                                                              |     |
| TdelSat59-63  | GGG 63                                                       |     |
| TinfSat50-63  | GGG 63                                                       |     |
| ***           |                                                              |     |
| <hr/>         |                                                              |     |
| TdelSat60-99  | TACGTATTGCGTCATACCGTGCAACATGACATGTCTCAACATGTTTCAATTTTATTT    | 60  |
| TinfSat15-99  | TACGTATTGCGTCATACCGTGCAACATGACATGTCTCAACATGTTTCAATTTTATTT    | 60  |
| *****         |                                                              |     |
| TdelSat60-99  | CTTACTCTTGCTAAAACATCGAAAAAATACTAGATTG                        | 99  |
| TinfSat15-99  | CTTACTCTTGCTAAAACATCGAAAAAATACTAGATTG                        | 99  |
| *****         |                                                              |     |
| <hr/>         |                                                              |     |
| TdelSat61-315 | ACAATTTATAAGGCCGAGACTGTAGGTGAAAACCTGAAAGCGACTGTAAAGCTTCCAGAT | 60  |
| TinfSat38-315 | ACAATTTATAAGGCCGAGACTGTAGGTGAAAACCTGAAAGCGACTGTAAAGCTTCCAGAT | 60  |
| *****         |                                                              |     |
| TdelSat61-315 | TGGAAGGGTACAACGAATCAGCTAATTACGCAATTACTACCGGTAACCCCTGCGTATATG | 120 |
| TinfSat38-315 | TGGAAGGGTACAACGAATCGGCTAATTACGCAATTACTACCGGTAACCCCTGCGTATATG | 120 |
| *****         |                                                              |     |
| TdelSat61-315 | AAGTCAACAATTACGTTAGATAAAGACATCTATCCCGCAAATAGTGATATGAAGGTTACG | 180 |
| TinfSat38-315 | AAGTCAACGATTACGTTAGATAAAGACATCTATCCCGCAAATAGTGATATGAAGGTTACG | 180 |
| *****         |                                                              |     |
| TdelSat61-315 | GTAACCTTGAAAGATTTGTATGGTAATAGCGTAAGTGGAAAAGTTGCAGAATTAAGTAT  | 240 |
| TinfSat38-315 | GTAACCTTGAAAGATTTGTATGGTAATAGCGTAAGTGGAAAAGTTGCAGAATTAAGTAT  | 240 |
| *****         |                                                              |     |
| TdelSat61-315 | GCGGTAGTAACAGTACCAAATGCAAAAATGAAAAAGGTGAAAAATGGAAAGAAAATGAA  | 300 |
| TinfSat38-315 | GCGGTAGTAACAGTACCAAATGCAAAAATGAAAAAGGTGAAAAATGGAAAGAAAATGAA  | 300 |
| *****         |                                                              |     |

|               |                                                               |     |  |
|---------------|---------------------------------------------------------------|-----|--|
| TdelSat61-315 | GCTGGGACCTATACT                                               | 315 |  |
| TinfSat38-315 | GCTGGGACCTATACT                                               | 315 |  |
|               | *****                                                         |     |  |
| <hr/>         |                                                               |     |  |
| TdelSat66-64  | AATGTGCAAAATCTAAGTAATATTTATGACAAAGTTCTACATTCTAATACTAATATAAAA  | 60  |  |
| TinfSat22-64  | AATGTGCAAAATCTAAGTAATATTTATGACAAAGTTCTACATTCTAATACTAATATAAAA  | 60  |  |
|               | *****                                                         |     |  |
| TdelSat66-64  | TGGA                                                          | 64  |  |
| TinfSat22-64  | TGGA                                                          | 64  |  |
|               | ****                                                          |     |  |
| <hr/>         |                                                               |     |  |
| TdelSat67-83  | AAAAACATATACATATCACCCCTGTACTATTGATTAAGCTCCCAAATCTCTTTAACATAA  | 60  |  |
| TinfSat85-83  | AAAAACATATACATATCACCCCTGTACTATTGATTAAGCTCCCAAATCTCTTTAACATAA  | 60  |  |
|               | *****                                                         |     |  |
| TdelSat67-83  | CTTTACACTATTACTATACTTAG                                       | 83  |  |
| TinfSat85-83  | CTTTACACTATTACTATACTTAG                                       | 83  |  |
|               | *****                                                         |     |  |
| <hr/>         |                                                               |     |  |
| TdelSat68-160 | TAGTGCTGCGTTTGTGCCGGCGATTACCAAATTTTCATCGTTTGTGCCGTAAAATTGACA  | 60  |  |
| TinfSat66-161 | TAGTGCTGCGTTTGTGCCGGCGATTACCAAATTTTCATCGTTTGTGCCGTAAAATTGACA  | 60  |  |
|               | *****                                                         |     |  |
| TdelSat68-160 | AAGATATTAAAGAAAAAAGTGCCAGTCCAACCTTGACGTCAAGTTAGACTGGCCACCAA   | 120 |  |
| TinfSat66-161 | AAGATATTGAAGAAAAAAGTGCCAGTCCAACCTTGACGTCAAGTTAGACTGGCCACCAA   | 120 |  |
|               | *****                                                         |     |  |
| TdelSat68-160 | -TTTCTATTCACTTTTTTAAATTTTCTTTTACCAATCGT                       | 160 |  |
| TinfSat66-161 | ATTTCTATTCACTTTTTTAACTTTTCTTTTGCCAATCGT                       | 161 |  |
|               | ***                                                           |     |  |
| <hr/>         |                                                               |     |  |
| TdelSat70-86  | TACATAAACGGAATACCAAGTTTGACATTCCGTTTAGGTATCACAACTGCCACTAACCT   | 60  |  |
| TinfSat47-87  | TACCTAAACGGAATACCAAGTTTGAGCTTCCTGCAATTTTCGTTTTCGCCGA          | 60  |  |
|               | ***                                                           |     |  |
| TdelSat70-86  | TCCGTTTCGTGT-TAGAAGCAGTGGTAC                                  | 86  |  |
| TinfSat47-87  | AATCTTCGTGTCTAGATGCGGTGGTAG                                   | 87  |  |
|               | *****                                                         |     |  |
| <hr/>         |                                                               |     |  |
| TdelSat73-372 | TAGTGCTGCGTTTGTGCCGGCGATTACCAAATTTCAACGTTTGTGCCGTAAAATTGACA   | 60  |  |
| TinfSat33-372 | TAGTGCTGCGTTTGTGCCGGCGATTACCAAATTTTCATCGTTTGTGCCGTAAAATTGACA  | 60  |  |
|               | *****                                                         |     |  |
| TdelSat73-372 | AAGATATTGACGAAAAACTGTTTCGTCGTACTTGAAAACCAAAGGCCATGGCTGCGAGTAA | 120 |  |
| TinfSat33-372 | AAGATATTAAAGAAAAACTGTTTCGTCGTACTTGAAAACCAAAGGCCATGGCTGCGAGTAA | 120 |  |
|               | *****                                                         |     |  |
| TdelSat73-372 | CATTTGAATGTGCGCGTGCTCCACTGACCGCCAACGGCCCTTATCAGGGCCAGCAACTAA  | 180 |  |
| TinfSat33-372 | CATTTGAATGTGCGCGTGCTCCACTGACCGCCAACGGCCCTTATCAGGGCCAGCAACTAA  | 180 |  |
|               | *****                                                         |     |  |
| TdelSat73-372 | AATGTACTGGCCCTCGATTTCCTAATCAAAATTCCTGGAATTTTCTTCGCTATTCTTAAG  | 240 |  |
| TinfSat33-372 | AATGTACTGGCCCTCGATTTCCTAATCAAAATTCCTGGAATTTTCTTCGCTATTCTTAAG  | 240 |  |
|               | *****                                                         |     |  |
| TdelSat73-372 | TGATTCAATTTGTGCCAGCGACCCACCAAATTCAGCGTTTGTGCTGCAAAATTGACAAAG  | 300 |  |
| TinfSat33-372 | TGTTTCATTTGTGCCAGCGACCCACCAAATTCAGCGTTTGTGCTGCAAAATTGACAAAG   | 300 |  |
|               | **                                                            |     |  |
| TdelSat73-372 | TTATTGAGGCGTCAAGTTAGACTGGCCACCAATTTCTATTCACTTTTTTAACTTTTCTC   | 360 |  |
| TinfSat33-372 | TTATTGAGGCGTCAAGTTAGACTGGCCACCAATTTCTATTCACTTTTTTAACTTTTCTC   | 360 |  |
|               | *****                                                         |     |  |
| TdelSat73-372 | TTTGCCAATCGT                                                  | 372 |  |
| TinfSat33-372 | TTTGCCAATCGT                                                  | 372 |  |
|               | *****                                                         |     |  |
| <hr/>         |                                                               |     |  |
| TdelSat76-96  | GGCAAGAAAGGTAATGAGTACAAAGTTTATTTTACATAATAGGATTAAGTATTACTAA    | 60  |  |
| TinfSat58-96  | GGCAAGAAAGGTAATGAGTACAAAGTTTATTTTACATAATAGGATTAAGTATTACTAA    | 60  |  |
|               | *****                                                         |     |  |
| TdelSat76-96  | ACATGTTAATAAGACCTGTGGTAACATGTCCGAACA                          | 96  |  |
| TinfSat58-96  | ACATGCTAATAAGACCTGTGGTAACATGTCCGACA                           | 96  |  |
|               | *****                                                         |     |  |
| <hr/>         |                                                               |     |  |

|                |                                                                                            |     |
|----------------|--------------------------------------------------------------------------------------------|-----|
| TdelSat86-164  | AATTGTTTGGAGTTAAATAAGGTGAGTGGCCAGTGCTGCTGTGCTGGTCACGTTTGTAGC                               | 60  |
| TinfSat57-164  | AATTGTTTGGAGTTAAATAAGGTGAGTGGCCAGTGCTGCTGTGCTGGTCACGTTTGTAGC<br>*****                      | 60  |
| TdelSat86-164  | TTTGTTTAACATAATCCTTCAATTCTACCCACAGCTTGCCGTTATGTTAGTTCCTTAGGAA                              | 120 |
| TinfSat57-164  | TTTGTTTAACATAATCCTTCAATTCTACCCACAGCTTGCCGTTATGTTAGTTCCTTAGGAA<br>*****                     | 120 |
| TdelSat86-164  | TTAACATATATATGCGGCGCCTCTTTTATTTTATTTTAGCGTAG                                               | 164 |
| TinfSat57-164  | TTAGCATATATATGCGGCGCCTTTTATATATATATTAGTGTAG<br>*** ***** ** * ** * ** *                    | 164 |
| TdelSat88-87   | TAACTGCAATGAGACCAAGTCGTCCTGAATGTTT--CACACCATTGAGTAACATTACAATA                              | 58  |
| TinfSat55-89   | TAACTGCAAGTGAGAGTAAGTTGTGTGAATGTTTTCACACCATTGAGTAACATTCCATTA<br>***** ** * ** * ***** ** * | 60  |
| TdelSat88-87   | TAAAGAAAATTTGTAATTTGTAATTGTAT                                                              | 87  |
| TinfSat55-89   | TAAAGAAAATTTGTCAATTGTAATTGTAT<br>*****                                                     | 89  |
| TdelSat94-72   | TCCAGCCACACTAAGTTCAAATATTAGAATAGTTTTTCGCCATTAAACCATATCACCAATC                              | 60  |
| TinfSat79-72   | TCCAGCCACACTAAGTTCAAATATTAGAATAGTTTTTCGCCATTAAACCATATCACCAATC<br>*****                     | 60  |
| TdelSat94-72   | AACGTTCTAACA                                                                               | 72  |
| TinfSat79-72   | AACGTTCTAACA<br>*****                                                                      | 72  |
| TdelSat106-44  | TAGGTAGTGCTAACACCAACAGAAT--CAATATTACCCCACTC                                                | 44  |
| TinfSat27-47   | TAGGTAGTGCTAACACCAACAGAATAATTAATATTACCCCACTC<br>*****                                      | 47  |
| TdelSat111-7   | ACAATTT                                                                                    | 7   |
| TinfSat95-7    | ACAATTT<br>*****                                                                           | 7   |
| TdelSat118-207 | TCAGTGGGCTTTTCGGTTACTCTAGTTGTAGCTTCAGTATCATGAATTGTAGATTGTTCT                               | 60  |
| TinfSat82-207  | TCAGTGGGCTTTTCGGTTACTCTAGTTGTAAATTCAGTATCATGAATTGTAGATTCTTCT<br>*****                      | 60  |
| TdelSat118-207 | GTGATAAGTGTAGTCGGTTGCTCAGTGTGTTGTTGTAATTCATCAGCGGTTTGTGCATCC                               | 120 |
| TinfSat82-207  | GTGATAATGTAGTCGGTTGCTCAGTGTGTTGTTGTAATTCATCAGCGGTTTGTGCATCC<br>*****                       | 120 |
| TdelSat118-207 | GTGCTAGATCCTATGTAAGATGCAGTATGGTCATTTGTGTAATATTTTCGGGTTATTTGGT                              | 180 |
| TinfSat82-207  | GTGCTAGATCCTATGTAAGATGCAGTATGGTCATTTGTGTAATATTTTCGGGTTATTTGGT<br>*****                     | 180 |
| TdelSat118-207 | GTATTCGGTTTGAATGTTGTTATAATA                                                                | 207 |
| TinfSat82-207  | GTATTCGGTTTGAATGTTGTTATAATA<br>*****                                                       | 207 |
| TdelSat119-348 | GTGAAGCCTATCACAACTTCGGCAACCTACACCGAAGAGTTCTCAACAATACAATCTTCA                               | 60  |
| TinfSat78-348  | GTGAAGCCTATCACAACTTCGGCAACCTACACCGAAGAGTTCTCAACAATACAATCTTCA<br>*****                      | 60  |
| TdelSat119-348 | TCACCTCATTCCACAGAACCAACATCAGAAAGTTATACTACTAACAGCCATCGCACAACT                               | 120 |
| TinfSat78-348  | TCACCTCATTCCACAGAACCAACATCAGAAAGTTATACTACTAACAGCCATCGCACAACT<br>*****                      | 120 |
| TdelSat119-348 | GAATCAGAATCTACACCAATCACACAATCAAGCCCAGAGATACATACCATATTTACGTCC                               | 180 |
| TinfSat78-348  | GAATCAGAATCTACACCAATCACACAATCAAGCCCAGAGATACGTACCACATTTACGTCC<br>*****                      | 180 |
| TdelSat119-348 | GCGTCCCCATCTACTGAGAACAGTGCACAACAACCGCCACCGCGCACACATCACAGCCT                                | 240 |
| TinfSat78-348  | GCGTCCCCATCTACTGAGAACAGTGCACAACAACCGCCACCGCGCACACATCACAGCCT<br>*****                       | 240 |
| TdelSat119-348 | AGCTCTGAAACATTCAATACAATTAAATACACTACGGGTCCGGGCACTGAAACCTATTCA                               | 300 |
| TinfSat78-348  | AGCTCTGAAACATTCAATACAATTAAATACACTACGGGTCCGGGCACTGAAACCTATTCA<br>*****                      | 300 |
| TdelSat119-348 | ACAATAGTGGGTTTCAGGCTCGACATCTCACAGCGAAGGTTATACTTCC                                          | 348 |
| TinfSat78-348  | ACAATAGTGGGTTTCAGGCTCGACATCTCACAGCGAAGGTTATACTTCC<br>*****                                 | 348 |
| TdelSat148-53  | CAGTAAGAGAAAGTGGGAAATGTATCACATTTCAGTTGGCAAGAACTAAATTG                                      | 53  |
| TinfSat26-53   | CAGTAAGAGAAAGTGGGAAATGTATCACATTTCAGTTGGCAAGAACTAAATTG<br>*****                             | 53  |

|                |                                                                                |     |
|----------------|--------------------------------------------------------------------------------|-----|
| TdelSat159-241 | AATGTATTGATAATGAATTTCTAAACGAAATTCAACAATAAACGTGTTAGGATTACGG                     | 60  |
| TinfSat63-237  | AATATATTTATAATGAATTTCTAAAGAAAATTCGGAACACAAATGCGTTAGGTTAAGG<br>*** **           | 60  |
| TdelSat159-241 | CAATATTTTA-CAATTAATGCAACACGAAATCCAACAAAA-TTCAATAATTCTGTTTAC                    | 119 |
| TinfSat63-237  | CAATATTTAACCAGAAATGCAACACGAAATCTAACAAAAGATAATTCTGTTTACTAC<br>***** **          | 118 |
| TdelSat159-241 | AACGAAACAGACAAAAATACATTAGATTACGGCAAATATTTAACAAAAATGTATAGCAA                    | 179 |
| TinfSat63-237  | GAAACAGACGACAAAAATACATTAGATTACGGCAAATATTTAACAAAAATGTATAGCAA<br>* * *****       | 178 |
| TdelSat159-241 | ATAAATGCAACACGAAATCTAACAAAA-GAATTAATAATTCTGTTTACAACGAAACAGACA                  | 239 |
| TinfSat63-237  | ATAAATGCAACACGAAATCTAACAAAAAGAA---TAATTCTGTTTACTACGAAACAGACA<br>***** ** ***** | 235 |
| TdelSat159-241 | AA                                                                             | 241 |
| TinfSat63-237  | AA                                                                             | 237 |
|                | **                                                                             |     |
