# Supplementary material for: Making the Genome Huge: The Case of Triatoma delpontei, a Triatominae Species with More than 50% of Its Genome Full of Satellite DNA
Source: MDPI journal article supplement (doi:10.3390/genes14020371), 2023-01-31

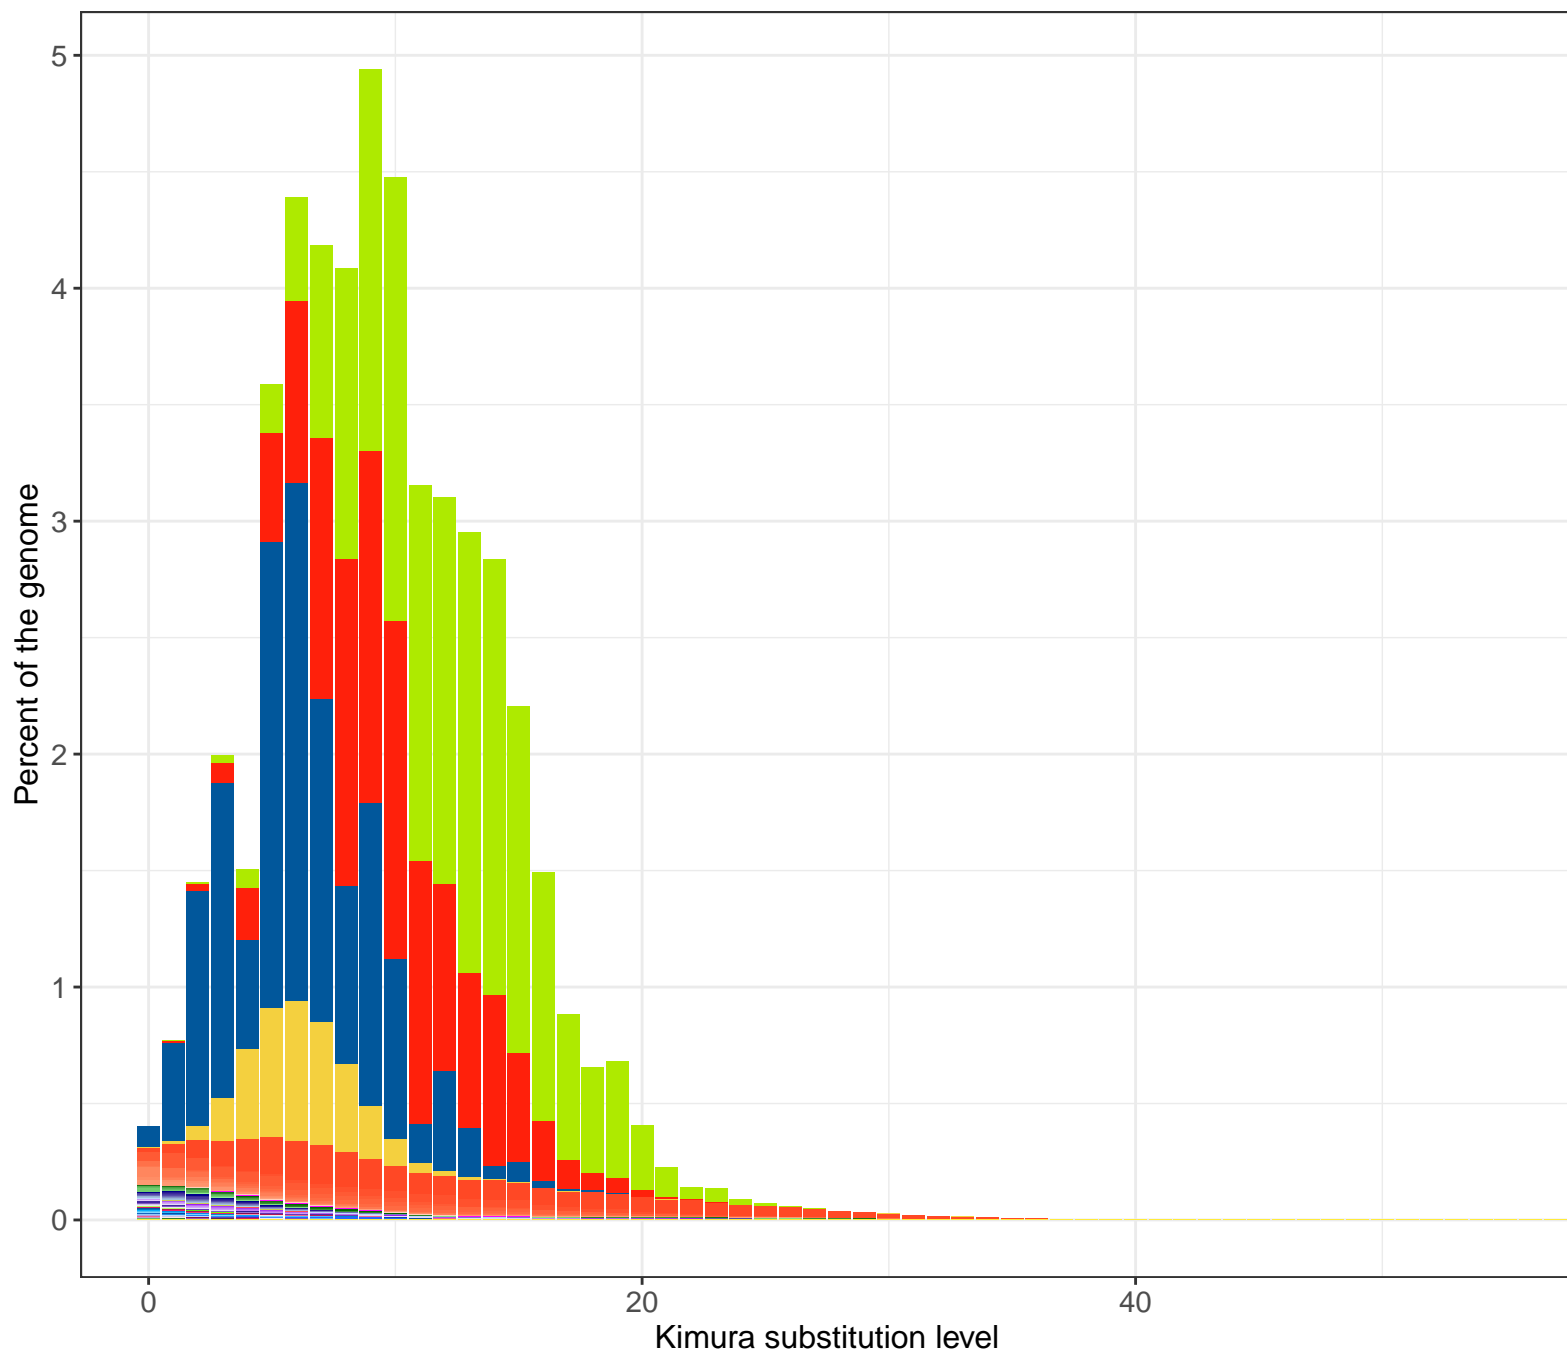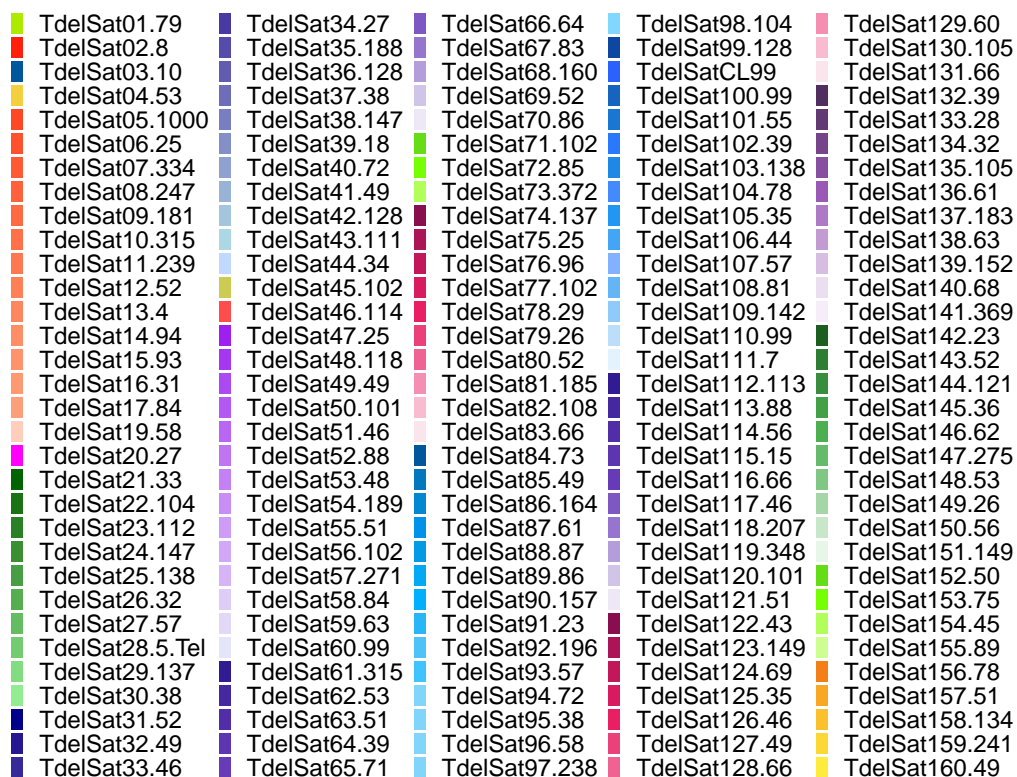

# Triatoma delpontei

Percent of the genome

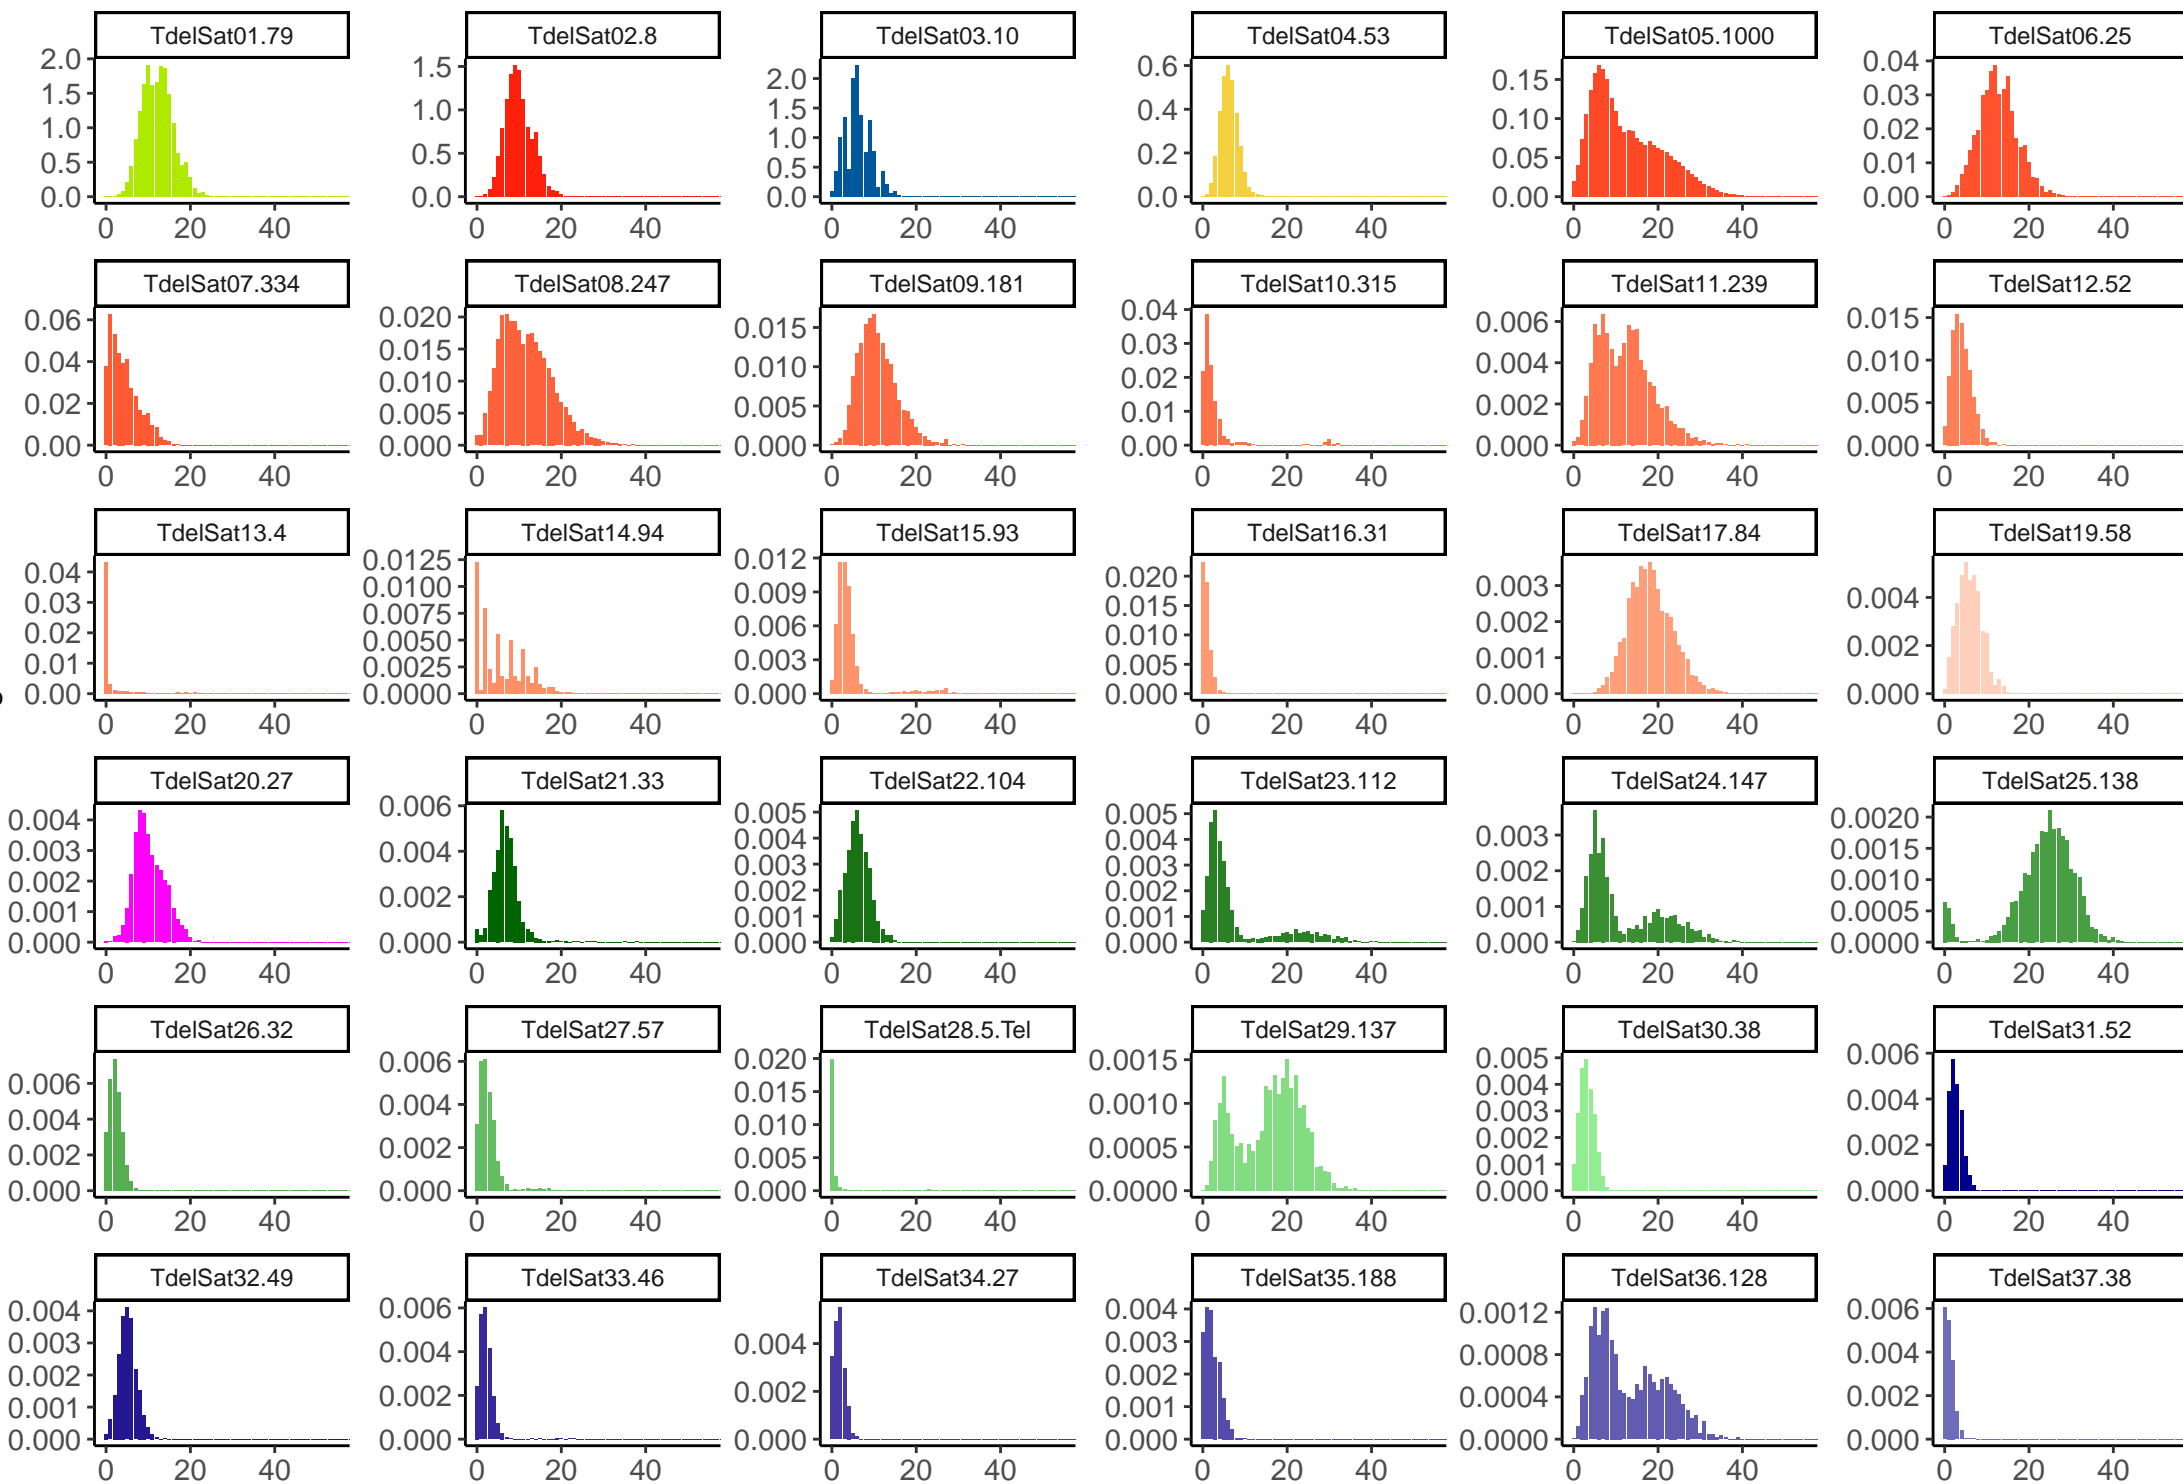

Kimura substitution level

# Triatoma delponte

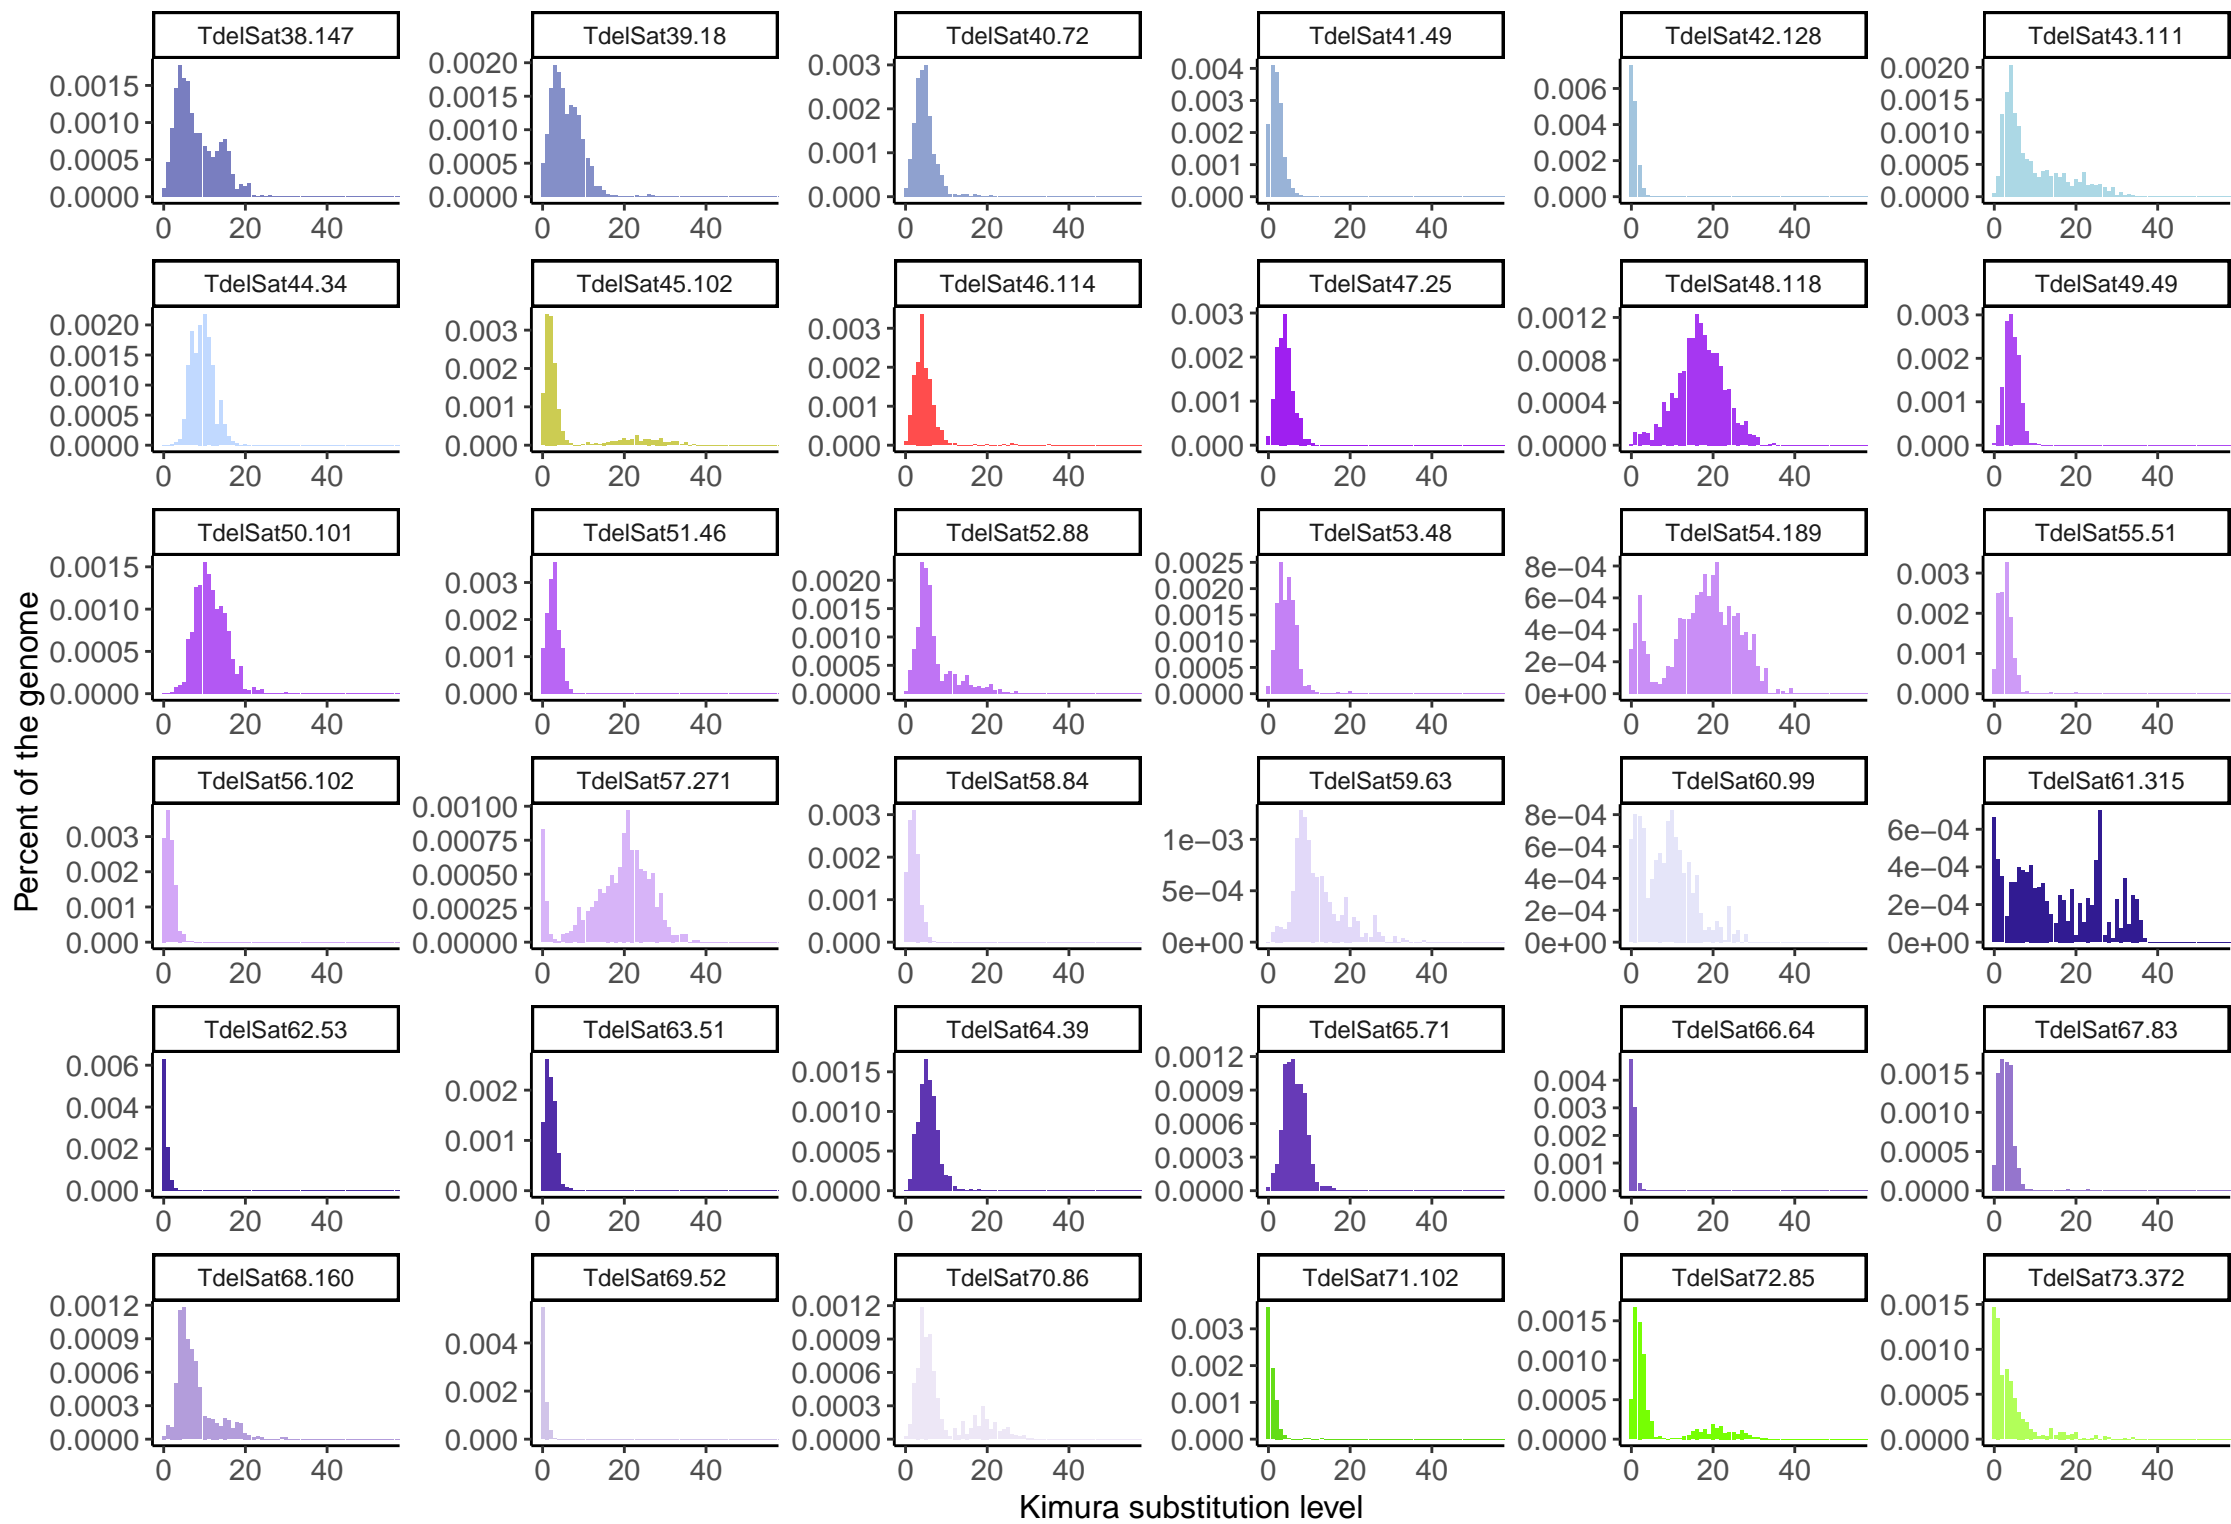

# Triatoma delponteii

Percent of the genome

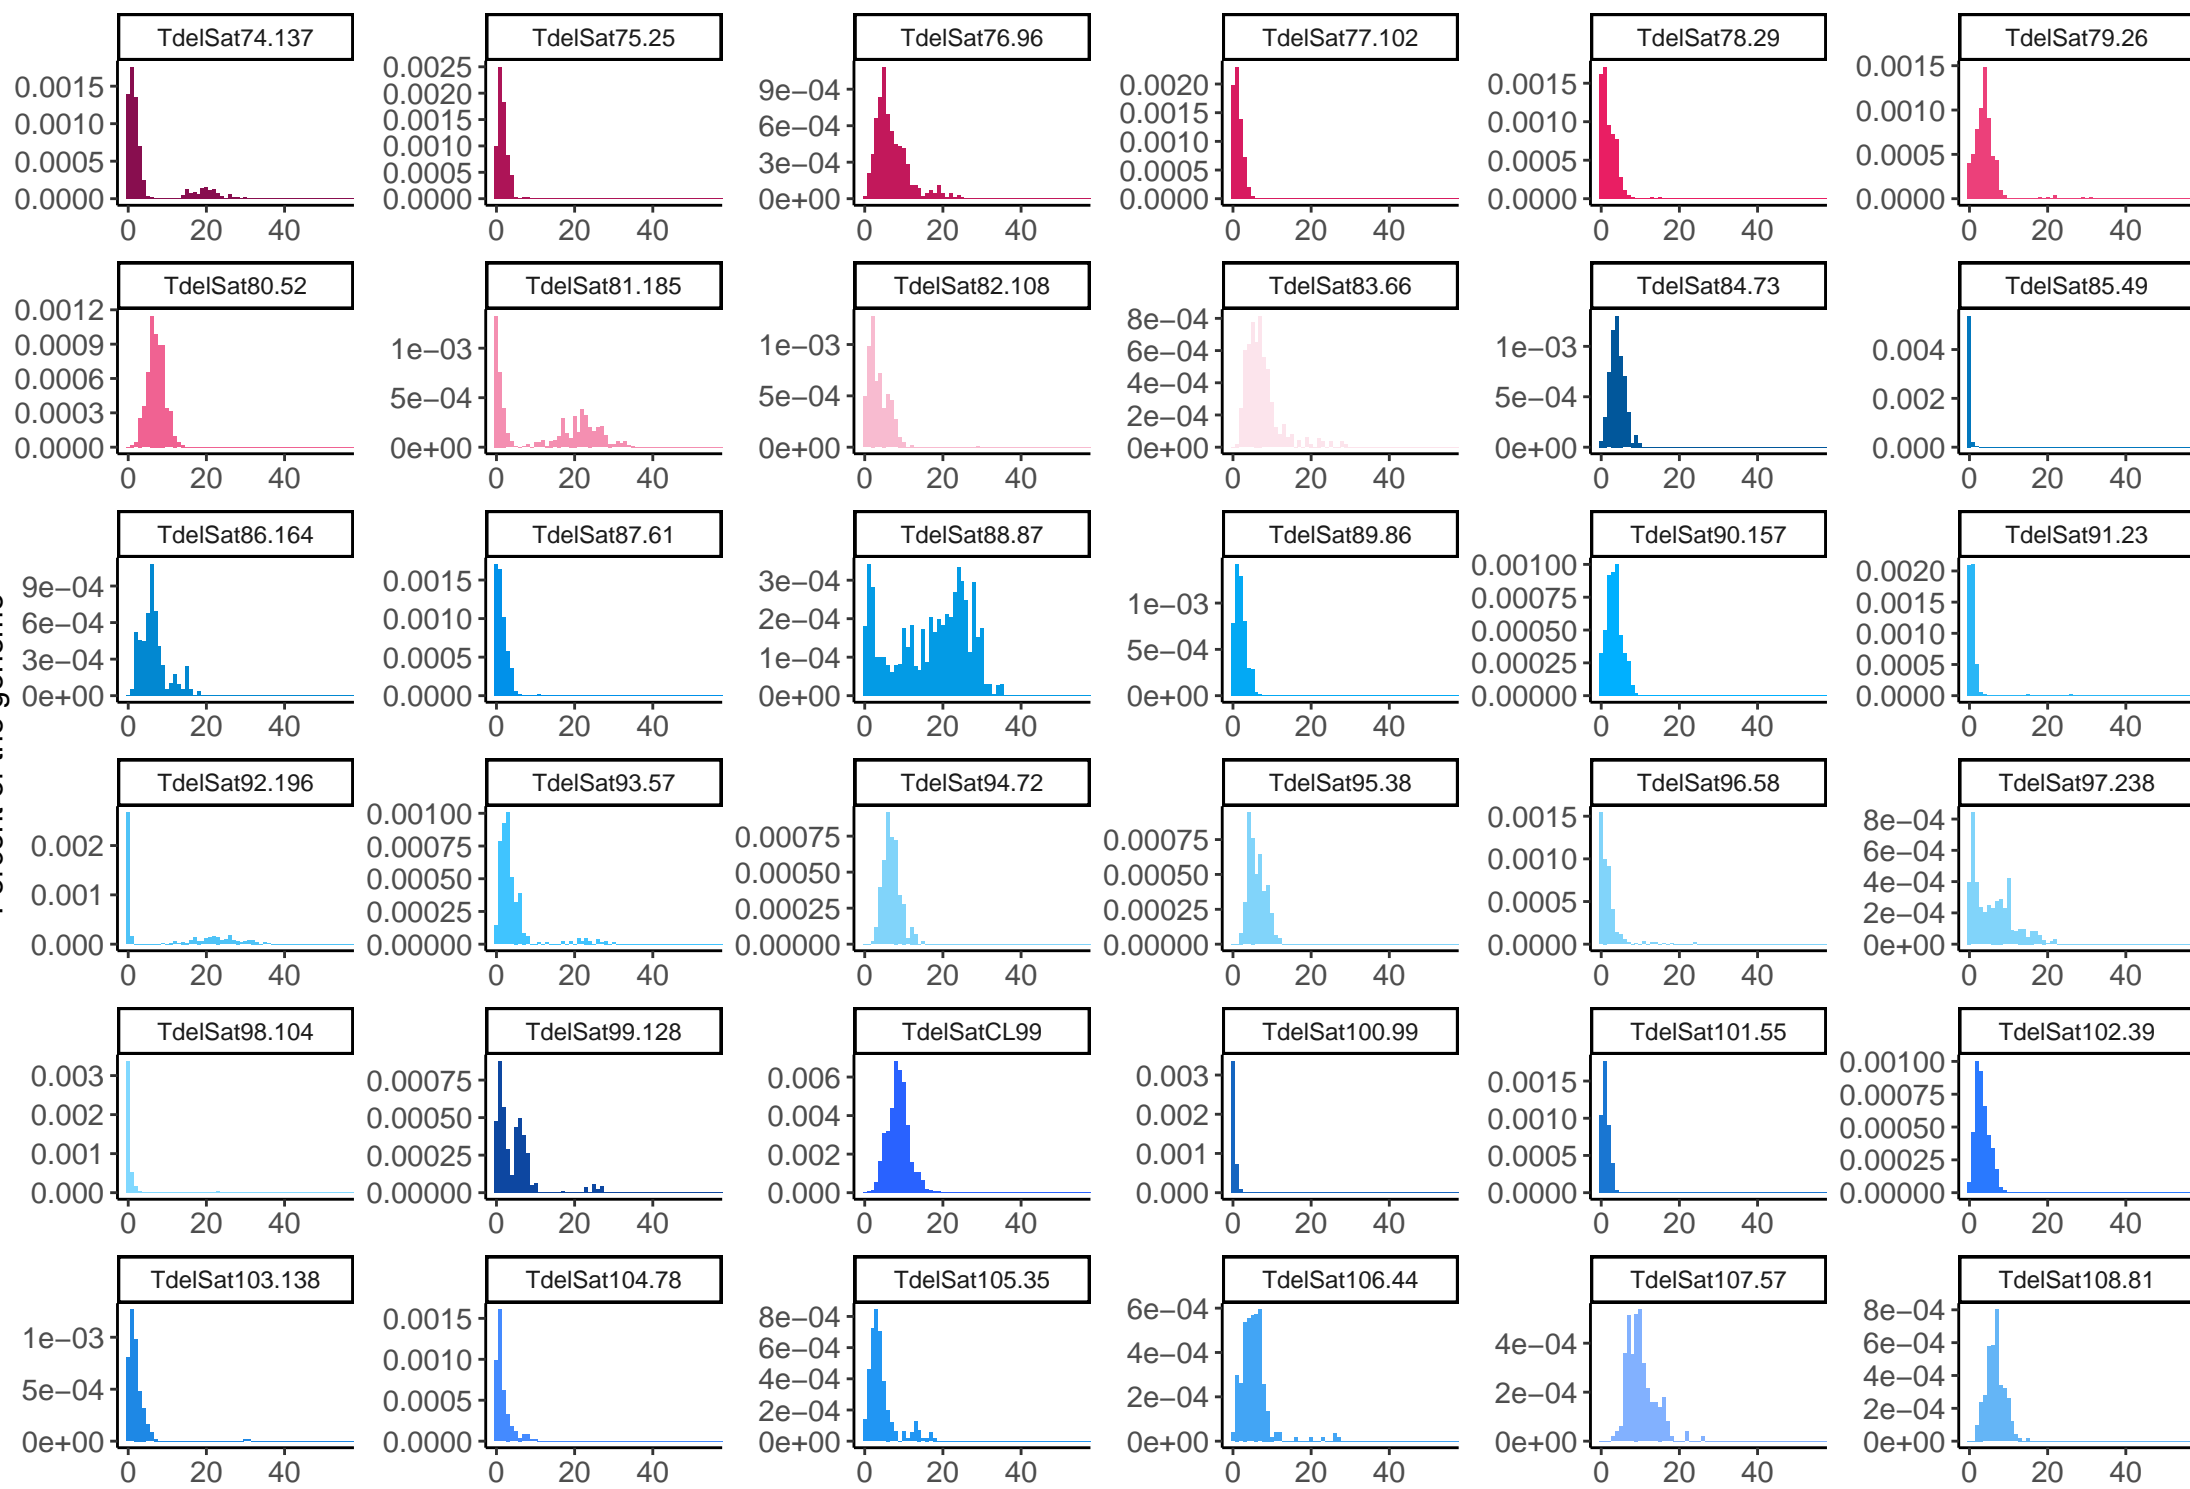

Kimura substitution level

## Triatoma delpontei

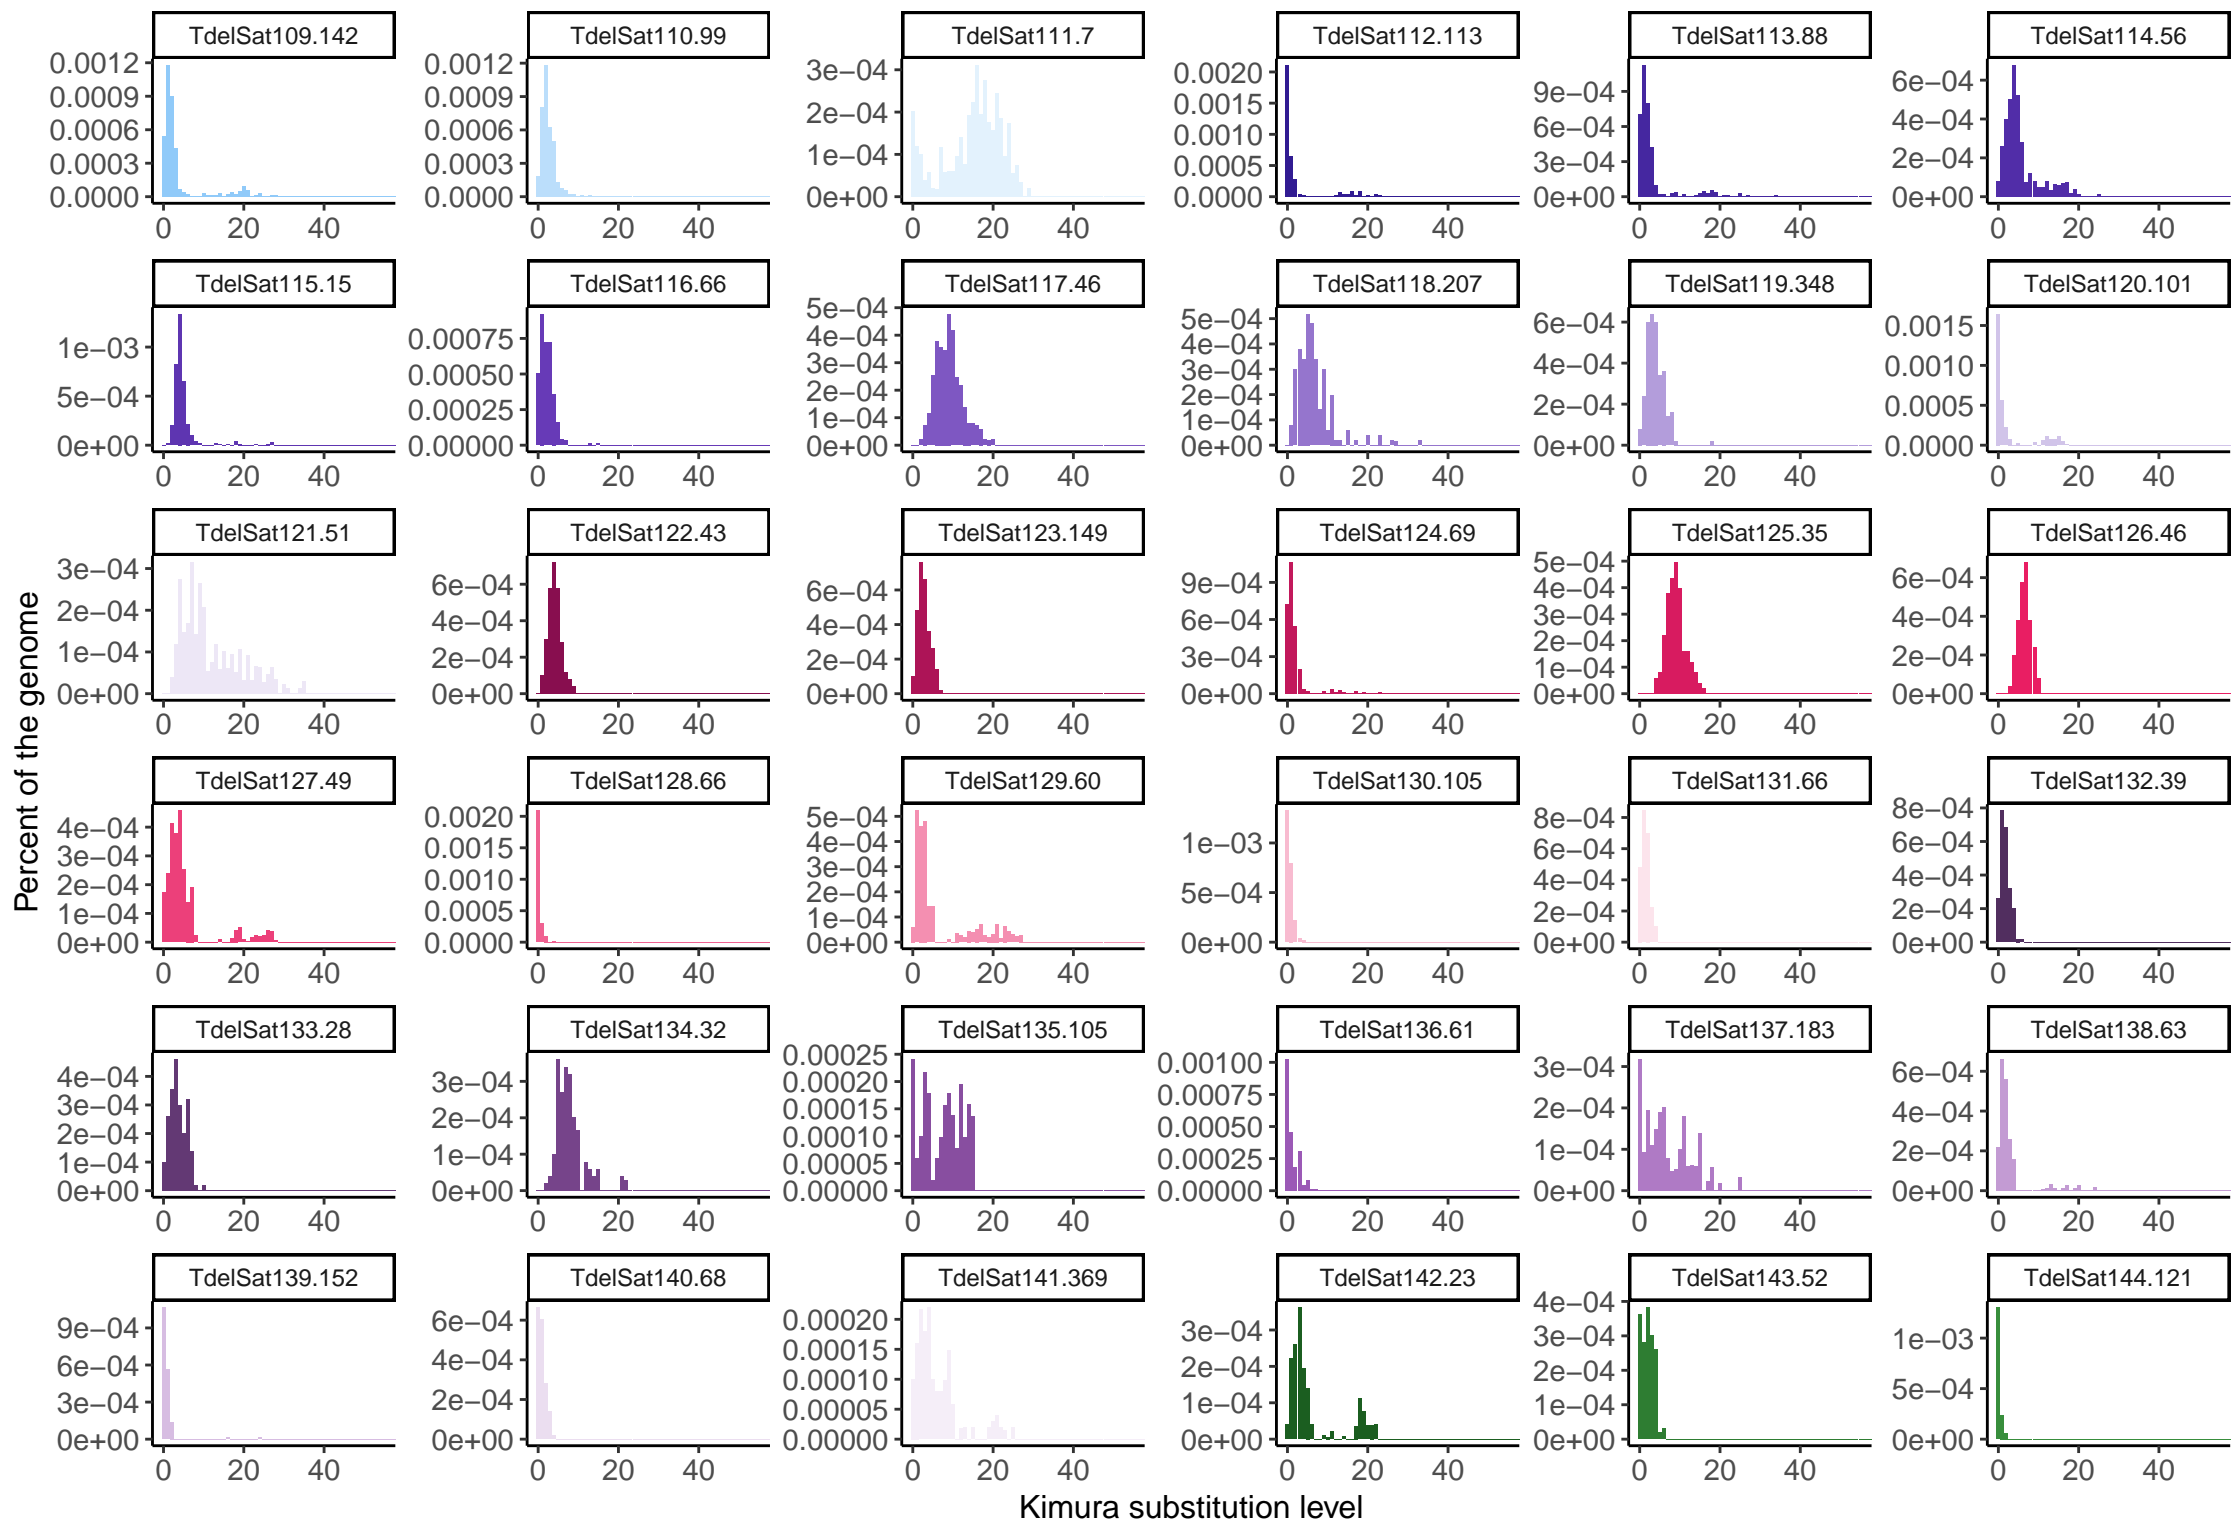

# Triatoma delpontei

Percent of the genome

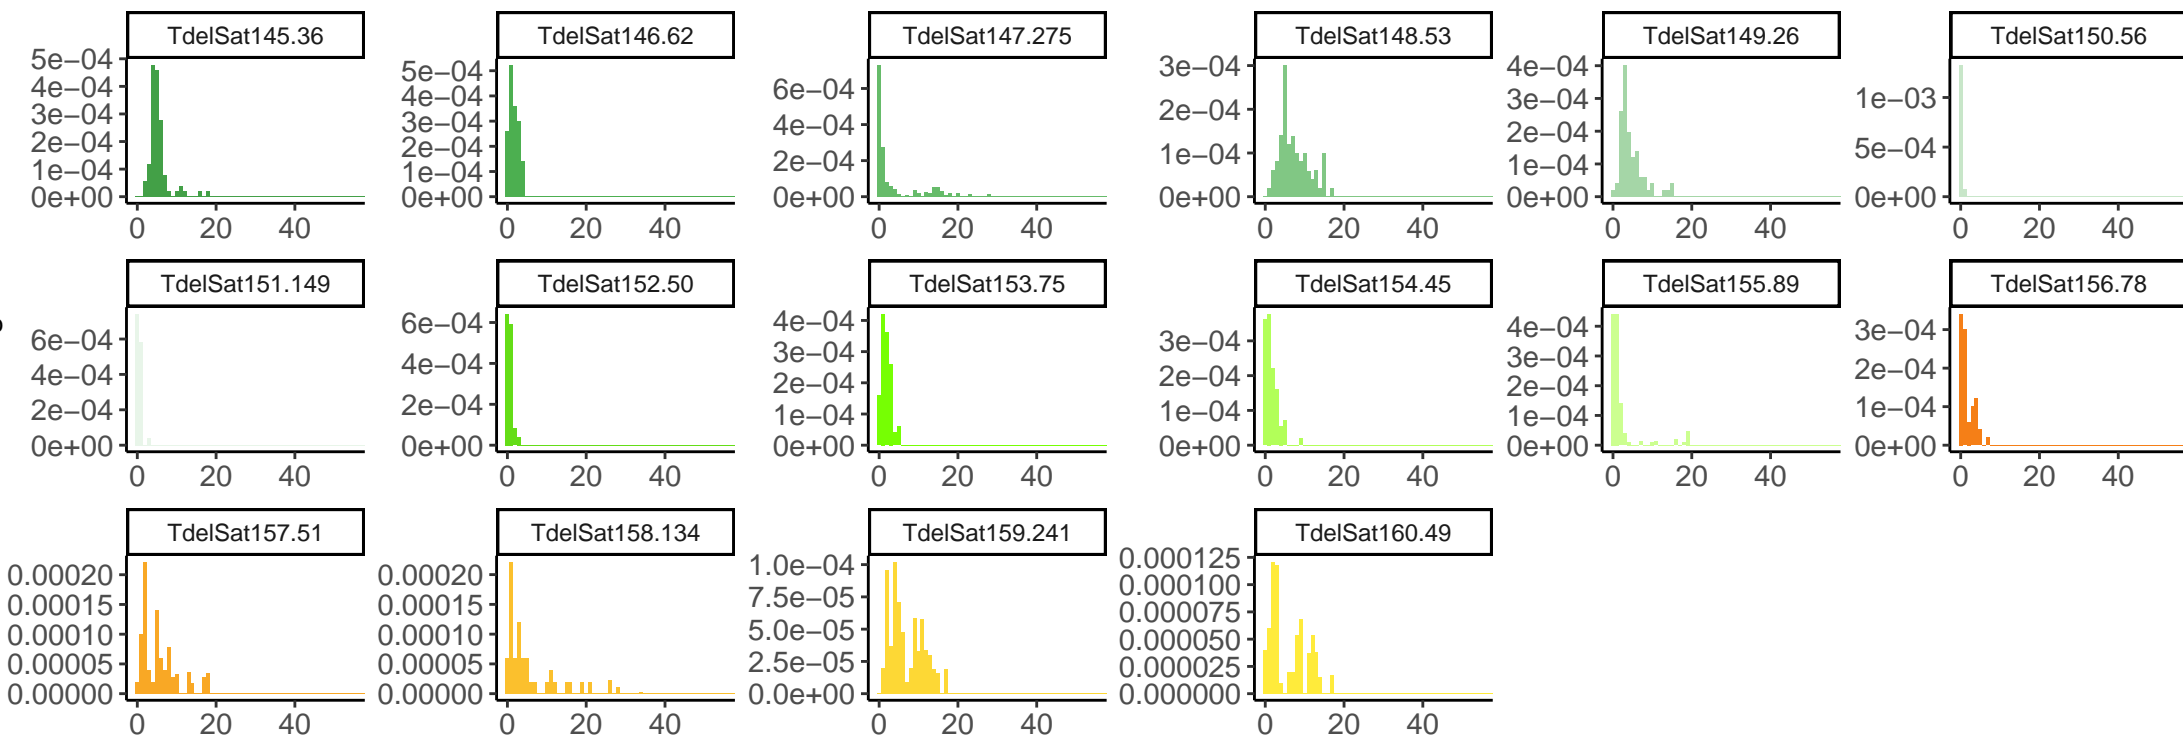

Supplement: s1 [file s1]
