# Supplementary material for: Making the Genome Huge: The Case of Triatoma delpontei, a Triatominae Species with More than 50% of Its Genome Full of Satellite DNA
Source: MDPI journal article supplement (doi:10.3390/genes14020371), 2023-01-31
Supplement: s1 [file s1]

**Supplementary Table S2.** Data of the satDNA families found in *Triatoma infestans*: genome abundances (%), divergences, A+T contents, and consensus sequences. Table includes the satDNAs families previously characterized in Pita et al. (2017) (Old families) and the new satDNAs detected in this study (New families).

| Old families   | New families  | Genome<br>abundance<br>(Andean)<br>(%) | Divergence<br>(Andean) | Genome<br>abundance<br>(non-Andean)<br>(%) | Divergence<br>(non-Andean) | A+T  | Accession<br>number | Consensus sequence                                                                                                                                                                                                                                                                   |
|----------------|---------------|----------------------------------------|------------------------|--------------------------------------------|----------------------------|------|---------------------|--------------------------------------------------------------------------------------------------------------------------------------------------------------------------------------------------------------------------------------------------------------------------------------|
| TinfSat01-33   |               | 11.671                                 | 7.31                   | 2.099                                      | 7.28                       | 0.67 |                     | Pita et al. (2017)                                                                                                                                                                                                                                                                   |
| TinfSat02-79   |               | 9.300                                  | 3.71                   | 11.127                                     | 4.79                       | 0.59 |                     | Pita et al. (2017)                                                                                                                                                                                                                                                                   |
| TinfSat03-4    |               | 6.236                                  | 4.24                   | 3.202                                      | 4.15                       | 0.75 |                     | Pita et al. (2017)                                                                                                                                                                                                                                                                   |
| TinfSat04-1000 |               | 4.927                                  | 12.13                  | 6.473                                      | 13.26                      | 0.67 |                     | Pita et al. (2017)                                                                                                                                                                                                                                                                   |
| TinfSat05-4    |               | 2.627                                  | 0.64                   | 0.734                                      | 1.29                       | 0.75 |                     | Pita et al. (2017)                                                                                                                                                                                                                                                                   |
|                | TinfSat43-242 | 0.679                                  | 11.28                  | 0.697                                      | 11.63                      | 0.48 | OQ082237            | >TinfSat43-242<br>GGCGCGTCAACATCTATGGTCATTGGCGCCCGGAGCCTTCT<br>CAGTGCAGTCCCGCCTCCGGACAGTGTTCTCTCGTTACAG<br>ACAACACTGTCCATCACCGGACAGTGAGCTGTAGAGGCTC<br>CTAGGAAGAAAAATCTAAGGGCAGCACGCTGGACTCGA<br>ACCCGGGACCTCCGCGTGGAGTCCAGTCGCTAACCACTGA<br>GCTAATCCCTTCCCTTTTTTTTTTTTTTTTTTAATTTAA |
|                | TinfSat44-8   | 0.405                                  | 18.22                  | 0.126                                      | 18.65                      | 0.63 |                     | >TinfSat44-8<br>GATAGTTG                                                                                                                                                                                                                                                             |
|                | TinfSat45-94  | 0.318                                  | 7.81                   | 0.342                                      | 8.15                       | 0.48 | OQ082238            | >TinfSat45-94<br>CGGAAAATGTCTCTGATGCTTTCCAGCTCTGCGGAACCAA<br>CCACCACAAAACGCCCGAAACCGGTCGATGACCACAAAA<br>TGAAGCAGGCTACCA                                                                                                                                                              |
|                | TinfSat46-131 | 0.264                                  | 17.95                  | 0.358                                      | 19                         | 0.65 | OQ082239            | >TinfSat46-131<br>GGGGTTCTGGGGGAACAGTAGCGTTATGCTTTCCTCTAAAG<br>TACCACTTCAGTATAATATATGGTTTTACCACCTACATAAT<br>ATACCTATCACTTTTATTGAAACATTTCCCGGGAAAAATT<br>GATTTTTT                                                                                                                     |
| TinfSat06-181  |               | 0.204                                  | 11.49                  | 0.129                                      | 11.94                      | 0.76 |                     | Pita et al. (2017)                                                                                                                                                                                                                                                                   |
| TinfSat08-239  |               | 0.196                                  | 12.36                  | 0.184                                      | 14.34                      | 0.59 |                     | Pita et al. (2017)                                                                                                                                                                                                                                                                   |

|               |               |       |       |       |       |      |          |                                                                                                                                                                                                                                                                                                                                                                                                |
|---------------|---------------|-------|-------|-------|-------|------|----------|------------------------------------------------------------------------------------------------------------------------------------------------------------------------------------------------------------------------------------------------------------------------------------------------------------------------------------------------------------------------------------------------|
|               | TinfSat47-87  | 0.133 | 15.08 | 0.135 | 15.44 | 0.59 | OQ082240 | >TinfSat47-87<br>TACCTAAACGGAATACCAAGTTTGAGCTTCCTGCAATTTTC<br>GTTTTTGGATTTTCCCGAAATCTTCGTGTCTAGATGCGGTG<br>GTAG                                                                                                                                                                                                                                                                                |
| TinfSat36-10  |               | 0.066 | 10.26 | 0.010 | 10.06 | 0.50 |          | Pita et al. (2017)                                                                                                                                                                                                                                                                                                                                                                             |
| TinfSat09-113 |               | 0.064 | 3.94  | 0.358 | 11.18 | 0.78 |          | Pita et al. (2017)                                                                                                                                                                                                                                                                                                                                                                             |
| TinfSat07-10  |               | 0.058 | 7.56  | 0.008 | 7.66  | 0.40 |          | Pita et al. (2017)                                                                                                                                                                                                                                                                                                                                                                             |
| TinfSat12-84  |               | 0.049 | 19.53 | 0.047 | 20.69 | 0.64 |          | Pita et al. (2017)                                                                                                                                                                                                                                                                                                                                                                             |
|               | TinfSat48-120 | 0.047 | 11.04 | 0.048 | 11.55 | 0.56 | OQ082241 | >TinfSat48-120<br>TATTACATCATCAGGTTCTCCCACTCTAGCCTGCTTAAGTC<br>AGAGAGTACCAGAGAGGGTCTTTTCTCTCTTAATTCTCTCG<br>TCTGTCTGCTCTCTTGCTGATGTAATTCTCTCTTGC                                                                                                                                                                                                                                               |
|               | TinfSat49-94  | 0.033 | 16.31 | 0.045 | 16.68 | 0.70 | OQ082242 | >TinfSat49-94<br>GGAGTGTATGGTTTCCTCAAAAAAGTCATTTTATTAAGTTT<br>AGATTCTCCAATTGATATAAAATTGAAGACAATTAAACAT<br>TTTGGAGAGAGGG                                                                                                                                                                                                                                                                        |
| TinfSat10-53  |               | 0.033 | 4.16  | 0.024 | 3.54  | 0.58 |          | Pita et al. (2017)                                                                                                                                                                                                                                                                                                                                                                             |
|               | TinfSat50-63  | 0.032 | 13.4  | 0.011 | 15.71 | 0.43 | OQ082243 | >TinfSat50-63<br>CGTGGCTTAAGTGCTCGTCCAGTTCGATGATTGGTCAGTTG<br>GAGAGGGGTGGGGTAAGTGGG                                                                                                                                                                                                                                                                                                            |
|               | TinfSat51-137 | 0.032 | 18.4  | 0.041 | 21.03 | 0.61 | OQ082244 | >TinfSat51-137<br>TAACAGGAGTAAGAGAAAGGCGTGTGAGTGTCCCCCACC<br>ACCTCCCCCTCCTAACATCACCAAATATATGTTAGGACA<br>AATGAGTAAAATTGGAAGTTTAAAGTAAATTCGTCACTTT<br>ATATATATCTCATTGTAG                                                                                                                                                                                                                         |
| TinfSat14-147 |               | 0.031 | 11.6  | 0.032 | 17.6  | 0.64 |          | Pita et al. (2017)                                                                                                                                                                                                                                                                                                                                                                             |
|               | TinfSat52-334 | 0.028 | 4.72  | 0.150 | 4.36  | 0.70 | OQ082245 | >TinfSat52-334<br>TAAACAGGCATAGGATATTATGCGCTAAAAAACATGTTAC<br>TTTTTAATCGAAGAATATTGGAACAAGTTAAACCATTATAA<br>GTTTCTAATCTGGGGAATGATTGCATTATATCCAAATTCG<br>AAATCTTCTGTTTTGTAGCCATTGTCTAACGTCTATTAGTCC<br>AAGAAAAACACAGATATACAATAGAATATAAACATATAT<br>TGCATAAAACATTCTTAAGTTATCGCATGGCAATTATTGT<br>GGATTGCAATAACAGTTTTGCTAGTAATTTCCAAGTTCTTT<br>CCTCAACCTTTCTAAACATGTAACAACTTGTTCTACTGTCTT<br>ACATTCT |

|               |               |       |       |       |       |      |          |                                                                                                                                                                                                    |
|---------------|---------------|-------|-------|-------|-------|------|----------|----------------------------------------------------------------------------------------------------------------------------------------------------------------------------------------------------|
|               | TinfSat53-128 | 0.027 | 18.91 | 0.035 | 20.23 | 0.65 | OQ082246 | >TinfSat53-128<br>TTTCAATTACTCATATGTCCTAATATAAAATATACAGGTGGT<br>GGGAGACAAGTGCCAGCCTAGCAACACAGACAGGTACAG<br>AATGATTACATTGTAGATAGCCAATAATTGAACAAACA<br>CATTGAA                                       |
|               | TinfSat54-128 | 0.027 | 15.2  | 0.025 | 18.41 | 0.61 | OQ082247 | >TinfSat54-128<br>AGATTGTGTGTTACAAAACACACCGACTATTAGCTCCGCAT<br>TCTTACATTGCACATATATAGGCCAGATACGGTGGCAGTGT<br>CTAAACAGAATACCATATTTGAGCTTCCTGTAATTTTCGTT<br>ATTG                                      |
|               | TinfSat55-89  | 0.026 | 13.66 | 0.031 | 16.21 | 0.71 | OQ082248 | >TinfSat55-89<br>TAAGTGCAGTGAGAGTAAGTTGTGTGAATGTTTTTCACACC<br>ATTGAGTAACATTCCATTATAAAGAAAATTGTCAATTGTA<br>ATTGTAT                                                                                  |
| TinfSat13-147 |               | 0.025 | 6.57  | 0.014 | 6.8   | 0.59 |          | Pita et al. (2017)                                                                                                                                                                                 |
|               | TinfSat56-118 | 0.023 | 14.48 | 0.026 | 16.71 | 0.64 | OQ082249 | >TinfSat56-118<br>TAAGTGGAGTAAGAGAAAGTCGTGTGAATATTTCCACCA<br>GTTTTACTTTGAAACACCTGGTAGCAAGTTAATGGTTCCGT<br>TACTGCTGTACAAGCGATTAAACAGTTAAATTGTAT                                                     |
| TinfSat21-38  |               | 0.021 | 10.16 | 0.007 | 10.58 | 0.63 |          | Pita et al. (2017)                                                                                                                                                                                 |
| TinfSat39-5   |               | 0.021 | 3.39  | 0.011 | 4.67  | 0.60 |          | Pita et al. (2017)                                                                                                                                                                                 |
| TinfSat11-85  |               | 0.020 | 4.68  | 0.020 | 4.43  | 0.71 |          | Pita et al. (2017)                                                                                                                                                                                 |
| TinfSat19-104 |               | 0.020 | 5.79  | 0.002 | 6.36  | 0.63 |          | Pita et al. (2017)                                                                                                                                                                                 |
| TinfSat17-118 |               | 0.017 | 4.04  | 0.003 | 3.99  | 0.60 |          | Pita et al. (2017)                                                                                                                                                                                 |
|               | TinfSat57-164 | 0.017 | 7.43  | 0.006 | 7.62  | 0.62 | OQ082250 | >TinfSat57-164<br>AATTGTTTGGAGTTAAATAAGGTGAGTGGCCAGTGCTGCT<br>GTGCTGGTCACGTTTGTAGCTTTGTTTAAACATAATCCTTCAA<br>TTCTACCCACAGCTTGCCGTTATGTTAGTTCTTAGGAATTA<br>GCATATATATGCGGCGCCCTTTATATATATATTAGTGTAG |
|               | TinfSat58-96  | 0.016 | 7.24  | 0.010 | 8.14  | 0.68 | OQ082251 | >TinfSat58-96<br>GGCAAGAAAGGTAATGAGTACAAAGTTAATTTTTACATA<br>ATAGGATTAAGTATTACTAAACATGCTAATAAGACCTGTG<br>GTAACATGTCGGACA                                                                            |

|               |               |       |       |       |       |      |          |                                                                                                                                                                    |
|---------------|---------------|-------|-------|-------|-------|------|----------|--------------------------------------------------------------------------------------------------------------------------------------------------------------------|
|               | TinfSat59-132 | 0.015 | 3.92  | 0.004 | 4.32  | 0.56 | OQ082252 | >TinfSat59-132<br>GAGACACGAGTTTCCCTTATTACAATTACAGTTATAGTTTG<br>GTAAATTAACACAGAGTGGTGGGGGTACATGTAGCAGGTA<br>GCAGCTAGTACTTTACCCGGTCCACAATACGCCACCTCCAT<br>CACACTGAAT |
| TinfSat33-372 |               | 0.015 | 6.59  | 0.017 | 5.98  | 0.58 |          | Pita et al. (2017)                                                                                                                                                 |
| TinfSat16-49  |               | 0.015 | 5.2   | 0.004 | 6.1   | 0.73 |          | Pita et al. (2017)                                                                                                                                                 |
| TinfSat20-46  |               | 0.014 | 6.16  | 0.002 | 16.64 | 0.70 |          | Pita et al. (2017)                                                                                                                                                 |
| TinfSat18-102 |               | 0.014 | 8.94  | 0.006 | 23.45 | 0.63 |          | Pita et al. (2017)                                                                                                                                                 |
|               | TinfSat60-33  | 0.014 | 10.3  | 0.015 | 8.8   | 0.70 | OQ082253 | >TinfSat60-33<br>TCTACACACATAAAATACCTATCACTGTATACTA                                                                                                                |
| TinfSat42-112 |               | 0.014 | 15.5  | 0.017 | 14.36 | 0.63 |          | Pita et al. (2017)                                                                                                                                                 |
| TinfSat30-58  |               | 0.013 | 4.63  | 0.005 | 4.53  | 0.66 |          | Pita et al. (2017)                                                                                                                                                 |
| TinfSat15-99  |               | 0.013 | 7.69  | 0.011 | 8.44  | 0.69 |          | Pita et al. (2017)                                                                                                                                                 |
| TinfSat23-51  |               | 0.012 | 3.61  | 0.007 | 3.43  | 0.67 |          | Pita et al. (2017)                                                                                                                                                 |
| TinfSat24-112 |               | 0.012 | 4.75  | 0.010 | 4.38  | 0.58 |          | Pita et al. (2017)                                                                                                                                                 |
| TinfSat22-64  |               | 0.012 | 2.46  | 0.002 | 3.15  | 0.78 |          | Pita et al. (2017)                                                                                                                                                 |
|               | TinfSat61-89  | 0.012 | 6.35  | 0.007 | 8.82  | 0.71 | OQ082254 | >TinfSat61-89<br>CAGTTGGGTGTAATGTTCAAGAAAAATACTAAATACTCTG<br>TTTTCAGCAAAAATACATCGGAAAATTTTATTTTAGTACAAC<br>ACACACTT                                                |
| TinfSat25-62  |               | 0.012 | 8.95  | 0.019 | 8.56  | 0.56 |          | Pita et al. (2017)                                                                                                                                                 |
|               | TinfSat62-120 | 0.011 | 12.05 | 0.019 | 11.58 | 0.61 | OQ082255 | >TinfSat62-120<br>TAAGAGAAAGTTGAGTGAGTATTTACACCAGTTTTTAGTC<br>ACACTCAAGAACTGTCAGCAATGTGTGCAATAAAAATGCA<br>CTAACACAACCAGTGTGTCCATGCTAGTACTAACTGCAG                  |
| TinfSat26-53  |               | 0.011 | 9.73  | 0.002 | 8.97  | 0.62 |          | Pita et al. (2017)                                                                                                                                                 |

|               |       |      |       |       |      |          |                                                                                                                                                                                                                                                                                     |
|---------------|-------|------|-------|-------|------|----------|-------------------------------------------------------------------------------------------------------------------------------------------------------------------------------------------------------------------------------------------------------------------------------------|
| TinfSat63-237 | 0.010 | 2.94 | 0.002 | 9.85  | 0.74 | OQ082256 | >TinfSat63-237<br>AATATATTTATAATGAATTTCTAAAGAAAAATTCGAAAAAC<br>ACAATGCGTTAGGTTAAAGGCAAATATTTAACCAAAATGC<br>AACACGAAATCTAACAAAAGAATAATTCTGTTTACTACGA<br>AACAGACGACAAAAATACATTAGATTACGGCAAATATTT<br>AACAAAAATGTATAGCAAATAAATGCAACACGAAATCTA<br>ACAAAAAGAATAATTCTGTTTACTACGAAACAGACAAA |
| TinfSat64-88  | 0.009 | 8.71 | 0.003 | 5.44  | 0.73 | OQ082257 | >TinfSat64-88<br>AGGTGAGTGTGTACTAAAATGAAATTTTATAGATGAATTTT<br>GGTGAAAATAGTGGATTTAGTATTTTATTGTACATTAAACG<br>CAACTG                                                                                                                                                                   |
| TinfSat65-103 | 0.009 | 6.44 | 0.007 | 10.6  | 0.67 | OQ082258 | >TinfSat65-103<br>TATAGCCTTTTCGAAACAATCGCGAAAAAAAACATTCAGT<br>TACTTCTTTCAGGTAGAAGTTACAGACCATTATGCGTGTAT<br>TTAGTGTGTGAAGTAATGTTTT                                                                                                                                                   |
| TinfSat31-71  | 0.009 | 9.18 | 0.001 | 10.47 | 0.70 |          | Pita et al. (2017)                                                                                                                                                                                                                                                                  |
| TinfSat27-47  | 0.008 | 5.57 | 0.008 | 5.47  | 0.62 |          | Pita et al. (2017)                                                                                                                                                                                                                                                                  |
| TinfSat66-161 | 0.008 | 8.29 | 0.011 | 8.21  | 0.61 | OQ082259 | >TinfSat66-161<br>TAGTGCTGCGTTTGTGCCGGCGATTACCAAATTTTCATCGT<br>TTGTGCCGTAAAATTGACAAAGATATTGAAGAAAAAAGT<br>GGCCAGTCCAACCTTGACGTCAAGTTAGACTGGCCACAAAA<br>TTTCTATTCACTTTTTTAACTTTTCTCTTGCCAATCGT                                                                                       |
| TinfSat28-46  | 0.008 | 3.87 | 0.009 | 4.22  | 0.65 |          | Pita et al. (2017)                                                                                                                                                                                                                                                                  |
| TinfSat32-52  | 0.008 | 5.97 | 0.012 | 6.37  | 0.60 |          | Pita et al. (2017)                                                                                                                                                                                                                                                                  |
| TinfSat67-114 | 0.008 | 4.55 | 0.007 | 4.78  | 0.68 | OQ082260 | >TinfSat67-114<br>TATCGTTACAACATTATTAATCTCATTACAGAGAATCTCT<br>ATATCGTTTTTAGCAGAACATTCTACAATAACTCCGCCATT<br>AGAGATTCCCTTAATGTTTTCTACACCCAATT                                                                                                                                         |
| TinfSat29-87  | 0.008 | 2.42 | 0.007 | 2.68  | 0.64 |          | Pita et al. (2017)                                                                                                                                                                                                                                                                  |
| TinfSat68-136 | 0.007 | 13   | 0.008 | 15.19 | 0.65 | OQ082261 | >TinfSat68-136<br>TTTCAAATTTGCTCATTGTGTCATGACATAAATATACAAATA<br>GTGGGGGAACAAGAGCCATCCAACTACCTATAGAGGCA<br>GCTACAGAATGAGTACATTGTAGGGAGGCCAATTATAGTA<br>AACAAACATATTGAA                                                                                                               |
| TinfSat69-58  | 0.007 | 1.87 | 0.006 | 1.85  | 0.71 | OQ082262 | >TinfSat69-58<br>TATGAGGAAGGAGAAATCATTAACTGTAACCTCCACAAGA<br>AACATAAAGAAAGAAAATT                                                                                                                                                                                                    |

|               |       |       |         |       |      |          |                                                                                                                                                                                                                       |
|---------------|-------|-------|---------|-------|------|----------|-----------------------------------------------------------------------------------------------------------------------------------------------------------------------------------------------------------------------|
| TinfSat70-170 | 0.006 | 11.64 | 0.004   | 13.72 | 0.70 | OQ082263 | >TinfSat70-170<br>TTAAATTTACTACAATTTATGTTCTGTGGTATTTTTAGATAG<br>GACTACTCCTTAAGGAGATATTGCTGAAATACCAGTTAGG<br>TGGAAGGTGAAGCTCCCAATATTTAGCTCATATCTTGGTT<br>AATATTAACCTCTATGATAAACTGTATAGAACTAAAATTGT<br>AGAGAA           |
| TinfSat71-99  | 0.006 | 7.56  | 0.002   | 12.27 | 0.59 | OQ082264 | >TinfSat71-99<br>TTTGTAGGTTGGCTGGCTGAAGGTAAACAGGTACAAGAAA<br>CCGTTAGATTAAGACAATATACTTATTGCCATTCCCCCCCC<br>CCCTTAGAATAGAAGAAA                                                                                          |
| TinfSat72-49  | 0.005 | 3.67  | < 0.001 | 2.32  | 0.69 | OQ082265 | >TinfSat72-49<br>GCAAACTATATAGTGAGATGATATGAGGGCAAGTATAACT<br>ATATTTTGT                                                                                                                                                |
| TinfSat73-44  | 0.005 | 3.45  | 0.007   | 4.14  | 0.66 | OQ082266 | >TinfSat73-44<br>TTTGGTTCTCACATAAAATACAGAACATTGCCGTTATTCAG<br>ATA                                                                                                                                                     |
| TinfSat74-147 | 0.005 | 13.65 | 0.007   | 12.82 | 0.72 | OQ082267 | >TinfSat74-147<br>AAGATAATCTTCTTGTAATTTTATTGTTTCATCTGTTTTTGT<br>TTATCATGAGTTTAACTGTATCGATCTTCTATGAATGGTT<br>TGATCACTTTTAACTTTTGGAAAACTTTTGGAGGATA<br>TACTCTTTCAGGTATTCCTGG                                            |
| TinfSat75-167 | 0.005 | 2.89  | N.D.    | -     | 0.64 | OQ082268 | >TinfSat75-167<br>GTGTGAGGAGACGACTGCTAAAAATTGATGTGCTTGTAAC<br>CCTAAAAATCTCAAGATATTATGCCGATATTTGGTCAAAAT<br>ATACTACACTAGTATAGCATTAAACGAGCCAAAATTCAC<br>TAGATCTGAGCAACGGAAGTGGGTTTTTTTTGCGGGAAATT<br>Pita et al. (2017) |
| TinfSat76-70  | 0.005 | 3.78  | 0.006   | 3.96  | 0.63 | OQ082269 | >TinfSat76-70<br>TGTTTTGAGATCCTTGAGTGGAATGTTTTAGCCTTGATGA<br>CTCTATGTTTCTGTGTATGTGTGAATAGA                                                                                                                            |
| TinfSat77-133 | 0.004 | 10.19 | N.D.    | -     | 0.68 | OQ082270 | >TinfSat77-133<br>AATTGGAGTACTGTAAAAATAGAAAAACGGATCCGTTTACCA<br>TTGAGGCAACGTTGTTTTTTTGTGATGAAAAATCTACGATA<br>ATAGCATTGCAAAGCAACTTTTTCTCAAAATCCATTTTGAAA<br>GATTTACAGTA                                                |

|               |       |       |       |       |      |          |                                                                                                                                                                                                                                                                                                                                                                                                               |
|---------------|-------|-------|-------|-------|------|----------|---------------------------------------------------------------------------------------------------------------------------------------------------------------------------------------------------------------------------------------------------------------------------------------------------------------------------------------------------------------------------------------------------------------|
| TinfSat78-348 | 0.004 | 3.4   | 0.004 | 4.48  | 0.54 | OQ082271 | >TinfSat78-348<br>GTGAAGCCTATCACAACTTCGGCAACCTACACCGAAGAGT<br>TCTCAACAATACAATCTTCATCACCTCATTCCACAGAACCA<br>ACATCAGAAAAGTTATACTACTAACAGCCATCGCACAACTG<br>AATCAGAATCTACACCAATCACACAATCAAGCCCAGAGAT<br>ACGTACCACATTTACGTCCGCGTCCCCATCTACTGAGAAC<br>AGTGCAACAACAACCGCCACCGCGCACACATCACAGCCT<br>AGCTCTGAAACATTCAATACAATTAATACTACGGGTC<br>CGGGCACTGAAACCTATTCAACAATAGTGGGTTACAGGCTC<br>GACATCTCACAGCGAAGGTTATACTTCC |
| TinfSat79-72  | 0.003 | 6.97  | 0.001 | 6.48  | 0.65 | OQ082272 | >TinfSat79-72<br>TCCAGCCACACTAACTTCAAATATTAGAATAGTTTTCGCCA<br>TTAAACCATATCACCAATCAACGTTCTAACA                                                                                                                                                                                                                                                                                                                 |
| TinfSat80-61  | 0.003 | 6.82  | 0.005 | 8.43  | 0.67 | OQ082273 | >TinfSat80-61<br>TATTAAGTGACTTTCTCTTACTGTAATTCTCACAGTCGAGTC<br>AATTTTGAAAATGAAAGGC                                                                                                                                                                                                                                                                                                                            |
| TinfSat81-51  | 0.003 | 14.36 | 0.003 | 14.56 | 0.65 | OQ082274 | >TinfSat81-51<br>CTTCTCAGGAAAAAGTTCTTCTTCCCTTCCCCAAAATTCT<br>TTCAATAAA                                                                                                                                                                                                                                                                                                                                        |
| TinfSat35-35  | 0.002 | 2.99  | 0.007 | 2.91  | 0.69 |          | Pita et al. (2017)                                                                                                                                                                                                                                                                                                                                                                                            |
| TinfSat82-207 | 0.002 | 9.59  | 0.002 | 11.44 | 0.63 | OQ082275 | >TinfSat82-207<br>TCAGTGGGCTTTTCGGTACTCTAGTTGTAAATTCAGTATCA<br>TGAATTGTAGATTCTTCTGTGATATGTGTAGTCGGTTGCTCA<br>GTGTTTGTGTGAAATTCTTCAGCGTTTGTGCATCCGTGCTA<br>GATCCTATGTAAGATGCAGTATGGTCATTTGTGTAATATTT<br>CGGGTTATTTGGTGTATTCGGTTTGAATGTTGTGTAATA                                                                                                                                                                |
| TinfSat83-235 | 0.002 | 2.36  | 0.005 | 2.23  | 0.70 | OQ082276 | >TinfSat83-235<br>AGAGATTGTTATATTCTTGTTAGTTTATAGCTTTGGTAATAT<br>TTTATCGAATTGAATGTTAATTACATAGATGCAGTAGAGAT<br>TGTCACAACTTGCAACATTCTTGATACTTTACACCTTTTACA<br>GTTTTGCTACTTTTGTGGTTTATACCTTACCATATCACAA<br>TTGCAAAAAAATAATAATGTTTGCAATATTTTACCAAGAGTT<br>TGAACGTTAATTGCCGTTACATGCGGA                                                                                                                              |

|                |       |       |       |      |      |          |                                                                                                                                                                                                                                                                                                                                                                                                                                               |
|----------------|-------|-------|-------|------|------|----------|-----------------------------------------------------------------------------------------------------------------------------------------------------------------------------------------------------------------------------------------------------------------------------------------------------------------------------------------------------------------------------------------------------------------------------------------------|
| TinfSat843-379 | 0.001 | 7.3   | 0.002 | 8.71 | 0.69 | OQ082277 | >TinfSat84-379<br>ACCTCACACAAAAATATACCATATACTATCCTTTCCATGCGA<br>AGAATTGAGACGAAATATGGGGCTTCGGTATTAGTTAGTA<br>TGAGAAACAGTACTGACGACGAAGAAATTCGTTGTTTTT<br>ACCCAAAAATTTACAGAACAGATCACAGACGACGTCGTT<br>AAGGATTATAAACATTATAAACCATCATCATTATCACTTAT<br>ATATAGGGGGTTGAACCTAATAAATCTTCAATATTCATT<br>TCGTTTAATGGAAGAACAGATTATTGAGCTTGATCAGTATG<br>TATGTTTTAAAGTTAAATGTACATAACTGATGAAGGTTTC<br>TTATGTCATGATTGTGCGCAACAATTAGAAGTAGAAGATA<br>AATTAAATATAAAA |
| TinfSat85-83   | 0.001 | 4.27  | 0.002 | 4.88 | 0.71 | OQ082278 | >TinfSat85-83<br>AAAAACATATACATATCACCCCTGTACTATTGATTAAGCTC<br>CCAAATCTCTTTAACATAACTTTACACTATTACTATACTTA<br>G                                                                                                                                                                                                                                                                                                                                  |
| TinfSat86-114  | 0.001 | 7.29  | 0.001 | 7.46 | 0.57 | OQ082279 | >TinfSat86-114<br>GTAGAGGTGTCCGTGATGTCATGAAGATGGGAAATAATTG<br>GCAGAGAGGGTTAGGGTGCGTCCTGACTCTGGCGAGTAGT<br>TTTTTCAGTCTTAGCTTTAATAAAGTCAGTTATA                                                                                                                                                                                                                                                                                                  |
| TinfSat87-98   | 0.001 | 17.91 | 0.001 | 17.1 | 0.60 | OQ082280 | >TinfSat87-98<br>ACCAGACCAATTACATAAATACTATAACGACCAATACTCC<br>ACATATACGCTTTCTCTTACAACCCAAGACAATTCCTCTG<br>GACCGCTC                                                                                                                                                                                                                                                                                                                             |
| TinfSat88-121  | 0.001 | 17.31 | 0.006 | 9.21 | 0.67 | OQ082281 | >TinfSat88-121<br>ATCCACTGAACAAACCAAATAGCATTTGAAATTTAACACA<br>TTAGTCCTAACATTAAATATAGTGGGGGATCAACACAGGC<br>GGTATAATTTGAATACATTACTGTCCTATAGATAGCGATAA                                                                                                                                                                                                                                                                                           |
| TinfSat89-49   | 0.001 | 8.62  | 0.002 | 8.06 | 0.86 | OQ082282 | >TinfSat89-49<br>TAATGATGTTCTTGATATAAATACAATATTTTAAAATTGAA<br>TAAAATTC                                                                                                                                                                                                                                                                                                                                                                        |
| TinfSat90-29   | 0.001 | 3.83  | 0.001 | 5.1  | 0.59 | OQ082283 | >TinfSat90-29<br>CTGTACAGAATAGCTAAGTGTGTGTGTGA                                                                                                                                                                                                                                                                                                                                                                                                |
| TinfSat91-238  | 0.001 | 9.79  | 0.001 | 8.89 | 0.74 | OQ082284 | >TinfSat91-238<br>CCAAACAACAATAATATGAACGGTTAACGGTCGTTTTTTTC<br>TATCAGTTATCATTCAATCAGTTACAAAGTTTTACACTTTA<br>ACATTTTTTTAATAAACTATTTGCATGTTTCCAATTATTTT<br>ATTATTATTTCTCTTTAAACACTATATCCAACCTGGCACAT<br>TCCTATCTAACAAAGTTTTTATATGTTTTCAATTTATATTTA<br>ATTTAAACACTACACCCTCCTTGGAACATT                                                                                                                                                            |



|               |               |       |               |       |      |          |                                                                                                                                |
|---------------|---------------|-------|---------------|-------|------|----------|--------------------------------------------------------------------------------------------------------------------------------|
| TinfSat40-73  | < 0.001       | 5.28  | < 0.001       | 6.34  | 0.60 |          | Pita et al. (2017)                                                                                                             |
| TinfSat92-61  | < 0.001       | 4.28  | 0.003         | 3.54  | 0.72 | OQ082285 | >TinfSat92-61<br>TTGCCACTAACAGCAATAAGAGAAAAGTAAAAAAGAAGCA<br>AAT                                                               |
| TinfSat93-102 | < 0.001       | 5.83  | < 0.001       | 7.22  | 0.65 | OQ082286 | >TinfSat93-102<br>GGAATTAATAATAGAGTCCGGTTACAAACGGTAATGAATTA<br>TTTTTCTAAACCACTATAACTAGGGCTAGTAGCAACCAG<br>CACTGTCTATCAGCTCATT  |
| TinfSat94-89  | < 0.001       | 10.09 | < 0.001       | 19.98 | 0.71 | OQ082287 | >TinfSat94-89<br>TAACTGCAGTGAGAGTAAGTTGTGTGAATGTTTTTCACACC<br>ATTGAGTAACATTCCATTATAAAGAAAATTTGTCAATTGTA<br>ATTGTAT             |
| TinfSat95-7   | < 0.001       | 11.88 | 0.005         | 14.63 | 0.86 | OQ082288 | >TinfSat95-7<br>ACAATTT                                                                                                        |
| TinfSat96-101 | < 0.001       | 16.29 | 0.010         | 12.33 | 0.70 | OQ082289 | >TinfSat96-101<br>ATATTGTAGCAAAATAGTTAATTCTAAAGTAGGGGGAGG<br>AATGCAGAGAGCAGTCAAATTCATTTGAACATAAACATCA<br>TTTATTATGTTAACTTACACT |
| TinfSat37-314 | N.D.          | -     | 0.037         | 3.48  | 0.45 |          | Pita et al. (2017)                                                                                                             |
| TinfSat38-315 | N.D.          | -     | 0.031         | 9.36  | 0.62 |          | Pita et al. (2017)                                                                                                             |
| TinfSat41-101 | N.D.          | -     | 0.006         | 2.34  | 0.67 |          | Pita et al. (2017)                                                                                                             |
| <b>TOTAL</b>  | <b>38.078</b> |       | <b>26.891</b> |       |      |          |                                                                                                                                |

N.D.: non detected
